# Supplementary material for: Catalytic asymmetric indolization by a desymmetrizing [3 + 2] annulation strategy
Source: Royal Society of Chemistry journal article supplement (doi:10.1039/d3sc02474a), 2023-01-01
Supplement: d3sc02474a1.pdf [file d3sc02474a1.pdf]

## Supporting Information

### Catalytic Asymmetric Indolization by a Desymmetrizing [3+2] Annulation Strategy

Changhui Wu,<sup>[a]</sup> Zhiqian Chang,<sup>[a]</sup> Chuanyong Peng,<sup>[a]</sup> Chen Bai,<sup>[a]</sup> Junhao Xing,<sup>[a]</sup>  
and Xiaowei Dou<sup>\*[a,b]</sup>

---

[a] C. Wu, Z. Chang, C. Peng, C. Bai, Prof. Dr. J. Xing, Prof. Dr. X. Dou  
Department of Chemistry, School of Science, China Pharmaceutical University, Nanjing, 211198, P. R. China  
E-mail: dxw@cpu.edu.cn

[b] Prof. Dr. X. Dou  
State Key Laboratory of Coordination Chemistry, Nanjing University, Nanjing, 210023, P. R. China

#### Table of Contents

|                                           |      |
|-------------------------------------------|------|
| 1. General information .....              | S2   |
| 2. Materials .....                        | S3   |
| 3. Experimental Section .....             | S13  |
| 4. Product Characterization .....         | S19  |
| 5. QSSR Model.....                        | S34  |
| 6. DFT Calculation .....                  | S37  |
| 7. References .....                       | S47  |
| 8. Single Crystal X-ray Diffraction ..... | S49  |
| 9. NMR Spectra.....                       | S51  |
| 10. HPLC Charts .....                     | S105 |
| 11. Cartesian Coordinates.....            | S141 |

---

## 1. General information

Unless otherwise noted, all commercialized reagents were used as received without further purification. All air-sensitive manipulations were performed under a dry nitrogen atmosphere using vacuum-line and standard Schlenk techniques. Reaction mixtures were stirred using Teflon-coated magnetic stir bars. Silicone oil bath is used as the heat source for all the reactions that requiring heating. Temperature was maintained using heidolph MR Hei-Tec heating blocks. The abbreviation “rt” refers to reactions carried out approximately between 23–27 °C. Thin layer chromatography (TLC) was performed on pre-coated silica gel HSGF<sub>254</sub> plates and compounds were visualized by observation under UV light at 254 nm and/or by treating the plates with KMnO<sub>4</sub> followed by heating. Flash column chromatography was carried out on silica gel (300–400 mesh).

NMR spectra were collected at room temperature on a Bruker AVANCE AV-400 spectrometer (400 MHz for <sup>1</sup>H, 101 MHz for <sup>13</sup>C) or a Bruker AVANCE AV-300 spectrometer (300 MHz for <sup>1</sup>H, 75 MHz for <sup>13</sup>C). Chemical shifts were reported in  $\delta$  (ppm) referenced to the residual solvent peak of CHCl<sub>3</sub>-*d* ( $\delta$  7.26) for <sup>1</sup>H NMR and CHCl<sub>3</sub>-*d* ( $\delta$  77.0) for <sup>13</sup>C NMR, the residual solvent peak of DMSO-*d*<sub>6</sub> ( $\delta$  2.50) for <sup>1</sup>H NMR and DMSO-*d*<sub>6</sub> ( $\delta$  39.52) for <sup>13</sup>C NMR. Multiplicity was indicated as follows: s (singlet), d (doublet), t (triplet), q (quartet), dd (doublet of doublets), dt (doublet of triplets), dq (doublet of quartets), td (triplet of doublets), tt (triplet of triplets), ddd (doublet of doublet of doublets), ddt (doublet of doublet of triplets), dtd (doublet of triplet of doublets), m (multiplet), br (broad), etc. Coupling constants were reported in Hertz (Hz). Enantiomeric excesses (ee) were determined by HPLC analysis on Shimadzu HPLC system with Daicel chiral columns. Authentic racemic samples of products for chiral HPLC assay determinations were obtained using [Rh(cod)Cl]<sub>2</sub> (3 mol %) as an achiral precatalyst. Optical rotations were measured on an Anton Paar MCP 100 automatic polarimeter. High resolution mass spectra (HRMS) were performed on Waters XEVO G2-S TOF or Agilent 6520B Q-FOF (ESI). Single crystal X-ray diffraction were obtained on Bruker D8 VENTURE diffractometer.

## 2. Materials

All solvents were purchased from commercial suppliers and degassed with N<sub>2</sub> before use. The catalysts [RhCl(L1)]<sub>2</sub>, [RhCl(L2)]<sub>2</sub> were prepared according to the reported procedures.<sup>1a</sup> The catalyst [RhCl(L3)]<sub>2</sub> was prepared according to the reported procedures.<sup>1b</sup> The catalyst [RhCl(L4)]<sub>2</sub> was prepared according to the reported procedures.<sup>1c</sup> The catalysts [RhCl(L7)]<sub>2</sub>, [RhCl(L8)]<sub>2</sub> were prepared according to the reported procedures.<sup>1d</sup> The catalysts [RhCl(L9)]<sub>2</sub>, [RhCl(L12)]<sub>2</sub> were prepared according to the reported procedures.<sup>1e</sup> The catalyst [RhCl(L16)]<sub>2</sub> was prepared according to the reported procedures.<sup>1f</sup> The catalyst [RhCl(L18)]<sub>2</sub> was prepared according to the reported procedures.<sup>1g</sup> The arylboronic acids **2a** was purchased from commercial suppliers and used as received. The 2-aminoarylboronic acid pinacol esters were purchased from commercial suppliers or prepared according to literature methods.<sup>2</sup> The 1,3-diketones were prepared according to literature methods.<sup>3a-3f</sup>

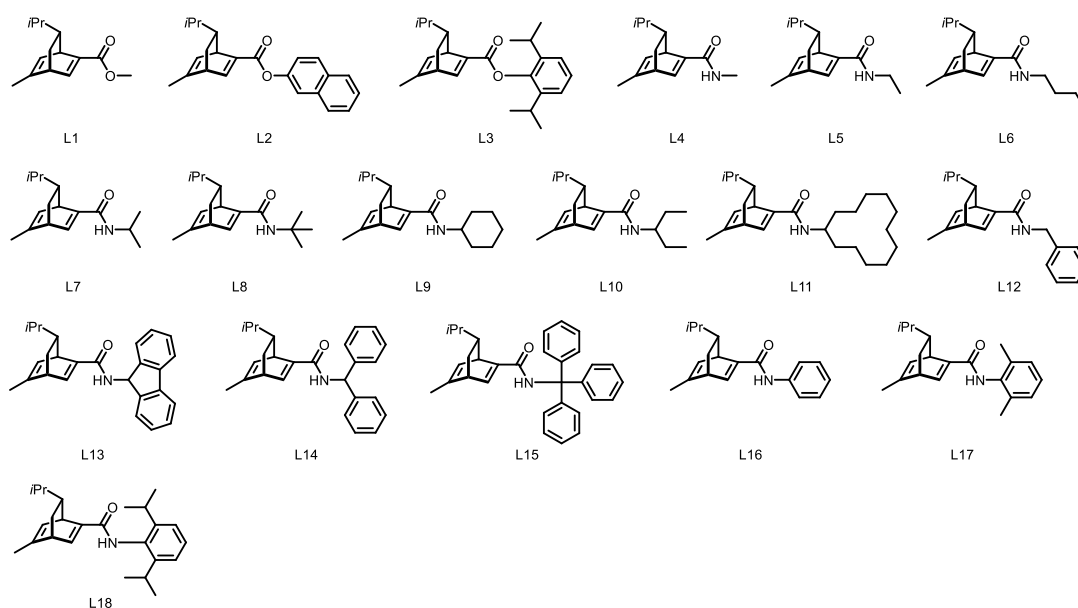

### 2.1 Preparation of ligands and catalysts

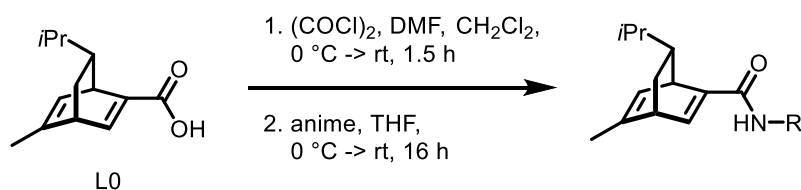

To a solution of carboxylic acid L0 (100 mg, 0.48 mmol, 1.0 equiv.) and DMF (7 μL, 0.01 mmol, 0.2 equiv.) in CH<sub>2</sub>Cl<sub>2</sub> (1.5 mL) at 0 °C was added oxalyl chloride (82

$\mu\text{L}$ , 0.97 mmol, 2.0 equiv.) dropwise over 1 min. The mixture was warmed to room temperature and stirred for 1.5 h to give a solution of the corresponding acyl chloride. The solvent was removed under vacuum, and the residue was dissolved in THF (1.0 mL). To a solution of the corresponding amine (1.21 mmol, 2.5 equiv.) in THF (1.5 mL) was added the solution of acyl chloride dropwise at 0 °C. The mixture was then stirred at room temperature for 16 h. Saturated aqueous  $\text{K}_2\text{CO}_3$  solution was added, and the mixture was extracted with EtOAc for three times. The combined organic extracts were washed with saturated aqueous  $\text{NH}_4\text{Cl}$  solution, dried over  $\text{Na}_2\text{SO}_4$ , filtered, and concentrated under vacuum. Purification of the residue by silica gel column chromatography eluting with petroleum ether/EtOAc (PE/EA) gave the corresponding diene ligands.

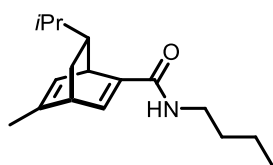

L6: Purified by silica gel column chromatography (PE:EA v/v=5:1) to obtain a white solid (86.7 mg, 68% yield).  $^1\text{H}$  NMR ( $\text{CHCl}_3\text{-}d$ , 300 MHz):  $\delta$  6.77 (dd,  $J$  = 6.2, 1.9 Hz, 1H), 5.90 (t,  $J$  = 5.8 Hz, 1H), 5.74 (dt,  $J$  = 6.0, 1.8 Hz, 1H), 3.98 (dt,  $J$  = 6.1, 2.0 Hz, 1H), 3.31 – 3.18 (m, 3H), 1.76 (d,  $J$  = 1.7 Hz, 3H), 1.56 – 1.48 (m, 1H), 1.48 – 1.40 (m, 2H), 1.35 – 1.25 (m, 2H), 1.18 – 1.11 (m, 1H), 1.08 – 0.99 (m, 1H), 0.94 (d,  $J$  = 5.9 Hz, 3H), 0.92 – 0.89 (m, 1H), 0.87 (t,  $J$  = 7.3 Hz, 4H), 0.76 (d,  $J$  = 6.1 Hz, 3H);  $^{13}\text{C}$  NMR ( $\text{CHCl}_3\text{-}d$ , 75 MHz):  $\delta$  166.03, 144.99, 143.84, 137.57, 124.10, 47.76, 43.53, 39.97, 39.26, 33.84, 31.81, 21.84, 21.38, 20.17, 19.00, 13.81. HRMS (ESI+): calcd. for  $\text{C}_{17}\text{H}_{28}\text{NO}^+$   $[\text{M}+\text{H}]^+$  262.2165, found 262.2175. Optical rotation:  $[\alpha]^{25}_{\text{D}} +20.7$  ( $c$  1.08,  $\text{CHCl}_3$ ).

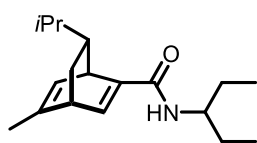

L11: Purified by silica gel column chromatography (PE:EA v/v=10:1) to obtain a white solid (87.5 mg, 66% yield).  $^1\text{H}$  NMR ( $\text{CHCl}_3\text{-}d$ , 300 MHz):  $\delta$  6.76 (dd,  $J$  = 6.2, 1.9 Hz, 1H), 5.80 (dt,  $J$  = 6.0, 1.8 Hz, 1H), 5.35 (d,  $J$  = 9.0 Hz, 1H), 4.01 (dt,  $J$  = 6.1, 2.0 Hz, 1H), 3.88 – 3.75 (m, 1H), 3.37 – 3.28 (m, 1H), 1.81 (d,  $J$  = 1.7 Hz, 3H), 1.61 – 1.51 (m, 3H), 1.43 – 1.33 (m, 2H), 1.23 – 1.17 (m, 1H), 1.12 – 1.04 (m, 1H), 0.99 (d,  $J$  = 5.9 Hz, 3H), 0.92 – 0.85 (m, 7H), 0.81 (d,  $J$  = 6.1 Hz, 3H);  $^{13}\text{C}$  NMR ( $\text{CHCl}_3\text{-}d$ , 75 MHz):  $\delta$  166.03, 145.36, 143.92, 137.13, 124.19, 51.88, 47.89, 43.58, 40.17, 33.90, 31.91, 27.58, 27.50, 21.91, 21.43, 19.08, 10.38, 10.34. HRMS (ESI+): calcd. for  $\text{C}_{18}\text{H}_{30}\text{NO}^+$   $[\text{M}+\text{H}]^+$  276.2322, found 276.2331. Optical rotation:  $[\alpha]^{25}_{\text{D}} +24.3$  ( $c$  0.66,  $\text{CHCl}_3$ ).

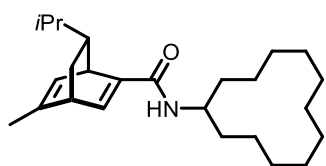

L12: Purified by silica gel column chromatography (PE:EA v/v=15:1) to obtain a white solid (136.1 mg, 76% yield). **<sup>1</sup>H NMR (CHCl<sub>3</sub>-d, 300 MHz):** δ 6.70 (dd, *J* = 6.2, 1.9 Hz, 1H), 5.75 (dt, *J* = 6.0, 1.9 Hz, 1H), 5.52 (d, *J* = 8.6 Hz, 1H), 4.11 – 4.02 (m, 1H), 3.99 (dt, *J* = 6.1, 2.1 Hz, 1H), 3.30 – 3.22 (m, 1H), 1.77 (d, *J* = 1.7 Hz, 3H), 1.57 – 1.17 (m, 26H), 1.08 – 1.00 (m, 1H), 0.95 (d, *J* = 5.8 Hz, 3H), 0.91 – 0.84 (m, 1H), 0.77 (d, *J* = 6.1 Hz, 3H); **<sup>13</sup>C NMR (CHCl<sub>3</sub>-d, 75 MHz):** δ 165.51, 145.29, 143.77, 137.01, 124.23, 47.73, 45.68, 43.52, 40.04, 33.89, 31.90, 30.45, 30.36, 23.85, 23.80, 23.56, 23.52, 23.42, 23.39, 21.86, 21.59, 21.53, 21.39, 19.02. **HRMS (ESI+):** calcd. for C<sub>25</sub>H<sub>42</sub>NO<sup>+</sup> [M+H]<sup>+</sup> 372.3261, found 372.3266. **Optical rotation:** [α]<sup>25</sup><sub>D</sub> +11.8 (*c* 1.28, CHCl<sub>3</sub>).

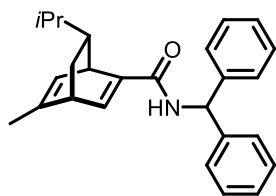

L14: Purified by silica gel column chromatography (PE:EA v/v=10:1) to obtain a white solid (167.3 mg, 93% yield). **<sup>1</sup>H NMR (CHCl<sub>3</sub>-d, 300 MHz):** δ 7.38 – 7.19 (m, 10H), 6.87 (dd, *J* = 6.2, 1.9 Hz, 1H), 6.37 (d, *J* = 7.9 Hz, 1H), 6.30 (d, *J* = 7.8 Hz, 1H), 5.87 – 5.76 (m, 1H), 4.12 (dt, *J* = 6.1, 2.0 Hz, 1H), 3.38 – 3.29 (m, 1H), 1.83 (d, *J* = 1.7 Hz, 3H), 1.59 (ddd, *J* = 11.6, 8.7, 3.0 Hz, 1H), 1.28 – 1.18 (m, 1H), 1.16 – 1.04 (m, 1H), 1.00 (d, *J* = 5.9 Hz, 4H), 0.99 – 0.90 (m, 3H), 0.84 (d, *J* = 6.2 Hz, 3H); **<sup>13</sup>C NMR (CHCl<sub>3</sub>-d, 75 MHz):** δ 165.16, 144.71, 143.69, 141.83, 141.79, 138.19, 128.66, 128.62, 127.49, 127.40, 127.38, 124.24, 56.93, 47.74, 43.61, 40.00, 33.86, 31.83, 21.88, 21.38, 19.05. **HRMS (ESI+):** calcd. for C<sub>26</sub>H<sub>30</sub>NO<sup>+</sup> [M+H]<sup>+</sup> 372.2322, found 372.2323. **Optical rotation:** [α]<sup>25</sup><sub>D</sub> +12.7 (*c* 1.42, CHCl<sub>3</sub>).

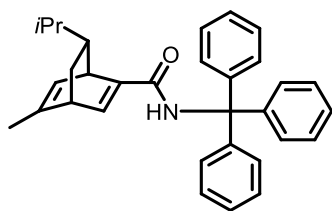

L15: This reaction condition needs to be modified from the standard reaction procedure. The mixture of acyl chloride and amine needed to be heated at reflux for 16 h. Purified by silica gel column chromatography (PE:EA v/v=15:1) to obtain a white solid (114.2 mg, 53% yield). **<sup>1</sup>H NMR (CHCl<sub>3</sub>-d, 300 MHz):** δ 7.38 – 7.28 (m, 15H), 7.00 – 6.91 (m, 2H), 5.91 – 5.80 (m, 1H), 4.09 (dt, *J* = 6.1, 2.0 Hz, 1H), 3.47 – 3.34 (m, 1H), 1.89 (d, *J* = 1.7 Hz, 3H), 1.68 (ddd, *J* = 11.6, 8.7, 3.0 Hz, 1H), 1.33 – 1.25 (m, 1H), 1.21 – 1.11 (m, 1H), 1.02 (d, *J* = 6.3 Hz, 3H), 1.01 – 0.94 (m, 1H), 0.89 (d, *J* = 6.3 Hz, 3H); **<sup>13</sup>C NMR (CHCl<sub>3</sub>-d, 75 MHz):** δ 164.92, 145.90, 145.02, 143.69, 137.76, 128.67, 127.96, 126.95, 124.28, 70.24, 47.78, 43.60, 40.09, 33.89, 31.91, 21.88, 21.40, 19.06.

**HRMS (ESI+):** calcd. for C<sub>32</sub>H<sub>34</sub>NO<sup>+</sup> [M+H]<sup>+</sup> 448.2635, found 448.2639. **Optical rotation:** [α]<sup>25</sup><sub>D</sub> +8.8 (*c* 2.00, CHCl<sub>3</sub>).

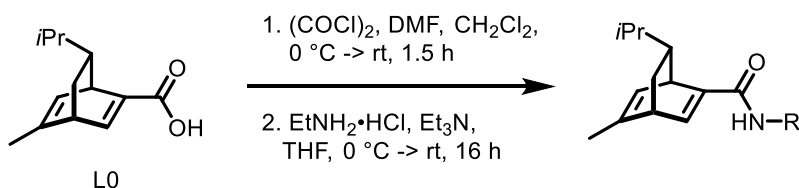

To a solution of carboxylic acid L0 (100 mg, 0.48 mmol, 1.0 equiv.) and DMF (7 μL, 0.01 mmol, 0.2 equiv.) in CH<sub>2</sub>Cl<sub>2</sub> (1.5 mL) at 0 °C was added oxalyl chloride (82 μL, 0.97 mmol, 2.0 equiv.) dropwise over 1 min. The mixture was warmed to room temperature and stirred for 1.5 h to give a solution of the corresponding acyl chloride. The solvent was removed under vacuum, and the residue was dissolved in THF (1.0 mL). To a solution of the corresponding ethylamine hydrochloride (98.8 mg, 1.21 mmol, 2.5 equiv.) in the mixture of THF (1.5 mL) and Et<sub>3</sub>N (0.2 mL, 1.45 mmol, 3.0 equiv.) was added the solution of acyl chloride dropwise at 0 °C. The mixture was then stirred at room temperature for 16 h. Saturated aqueous K<sub>2</sub>CO<sub>3</sub> solution was added, and the mixture was extracted with EtOAc for three times. The combined organic extracts were washed with saturated aqueous NH<sub>4</sub>Cl solution, dried over Na<sub>2</sub>SO<sub>4</sub>, filtered, and concentrated under vacuum. Purification of the residue by silica gel column chromatography eluting with petroleum ether/EtOAc (PE/EA) gave the corresponding diene ligands.

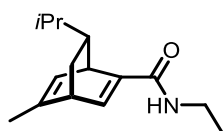

L5: Purified by silica gel column chromatography (PE:EA v/v=3:1) to obtain a white solid (73.2 mg, 65% yield). <sup>1</sup>H NMR (CHCl<sub>3</sub>-*d*, 300 MHz): δ 6.78 (dd, *J* = 6.2, 2.0 Hz, 1H), 5.88 – 5.63 (m, 2H), 4.06 – 3.94 (m, 1H), 3.37 – 3.24 (m, 3H), 1.79 (d, *J* = 1.7 Hz, 3H), 1.54 (ddd, *J* = 11.5, 8.6, 3.0 Hz, 1H), 1.22 – 1.17 (m, 1H), 1.13 (t, *J* = 7.2 Hz, 3H), 1.08 – 1.02 (m, 1H), 0.97 (d, *J* = 5.9 Hz, 3H), 0.93 – 0.88 (m, 1H), 0.79 (d, *J* = 6.1 Hz, 3H); <sup>13</sup>C NMR (CHCl<sub>3</sub>-*d*, 75 MHz): δ 166.05, 145.07, 143.98, 137.75, 124.18, 47.83, 43.62, 40.08, 34.44, 33.94, 31.87, 21.93, 21.47, 19.09, 15.03. **HRMS (ESI+):** calcd. for C<sub>15</sub>H<sub>24</sub>NO<sup>+</sup> [M+H]<sup>+</sup> 234.1852, found 234.1862. **Optical rotation:** [α]<sup>25</sup><sub>D</sub> +28.8 (*c* 0.27, CHCl<sub>3</sub>).

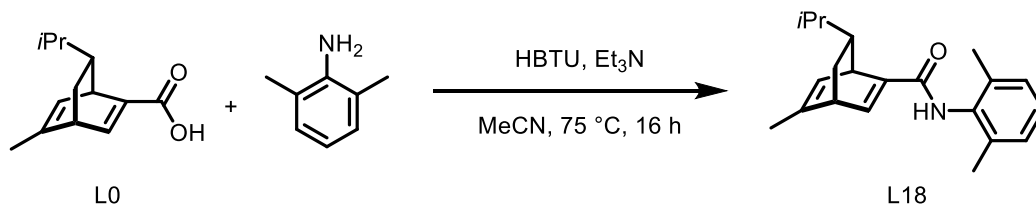

To a solution of carboxylic acid L0 (100 mg, 0.48 mmol, 1.0 equiv.) and HBTU (202.2 mg, 0.53 mmol, 1.1 equiv.) in MeCN (10 mL) at room temperature was added Et<sub>3</sub>N (74 μL, 0.53 mmol, 1.1 equiv.) and 2,6-dimethylaniline (58.7 mg, 1.1 mmol, 1.1 equiv.). The mixture was heated at 75 °C for 16 h, then cooled to room temperature, quenched with brine. The mixture was extracted with EtOAc for three times. The combined organic extracts were washed with 1 M aqueous HCl solution, saturated aqueous NaHCO<sub>3</sub> solution, and brine. The organic layer was dried over Na<sub>2</sub>SO<sub>4</sub>, filtered, and concentrated under vacuum. Purification of the residue by silica gel column chromatography eluting with petroleum ether/EtOAc (PE/EA) gave the corresponding diene ligands.

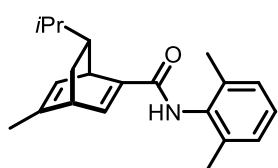

L17: Purified by silica gel column chromatography (PE:EA v/v=10:1) to obtain a white solid (55.6 mg, 37% yield). **<sup>1</sup>H NMR (CHCl<sub>3</sub>-d, 300 MHz):** δ 7.13 – 6.97 (m, 5H), 5.84 (dt, *J* = 6.2, 1.9 Hz, 1H), 4.10 (dt, *J* = 6.1, 2.1 Hz, 1H), 3.44 – 3.35 (m, 1H), 2.21 (s, 6H), 1.86 (d, *J* = 1.6 Hz, 3H), 1.64 (ddd, *J* = 11.6, 8.7, 3.0 Hz, 1H), 1.26 – 1.21 (m, 1H), 1.17 – 1.09 (m, 1H), 1.00 (d, *J* = 6.4 Hz, 3H), 0.98 – 0.96 (m, 1H), 0.84 (d, *J* = 6.3 Hz, 3H); **<sup>13</sup>C NMR (CHCl<sub>3</sub>-d, 75 MHz):** δ 164.24, 144.87, 143.89, 139.02, 135.65, 134.09, 128.19, 127.13, 124.17, 48.09, 43.79, 40.26, 33.93, 31.86, 21.96, 21.49, 19.15, 18.64. **HRMS (ESI+):** calcd. for C<sub>21</sub>H<sub>28</sub>NO<sup>+</sup> [M+H]<sup>+</sup> 310.2165, found 310.2166. **Optical rotation:** [α]<sub>D</sub><sup>25</sup> +7.8 (*c* 0.45, CHCl<sub>3</sub>).

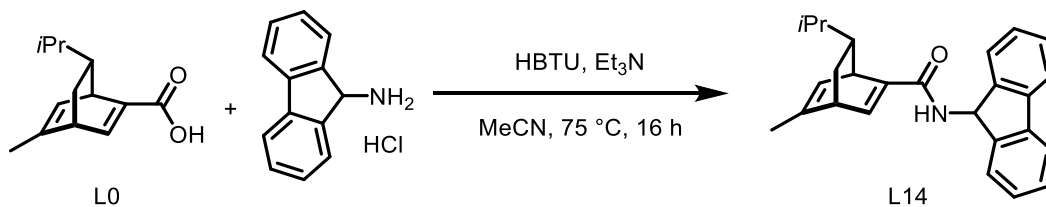

To a solution of carboxylic acid L0 (100 mg, 0.48 mmol, 1.0 equiv.) and HBTU (202.2 mg, 0.53 mmol, 1.1 equiv.) in MeCN (10 mL) at room temperature was added Et<sub>3</sub>N (148 μL, 1.1 mmol, 2.2 equiv.) and 9H-fluoren-9-amine hydrochloride (116.1 mg, 0.53 mmol, 1.1 equiv.). The mixture was heated at reflux for 16 h, then cooled to room

temperature, quenched with brine. The mixture was extracted with EtOAc for three times. The combined organic extracts were washed with 1 M aqueous HCl solution, saturated aqueous NaHCO<sub>3</sub> solution, and brine. The organic layer was dried over Na<sub>2</sub>SO<sub>4</sub>, filtered, and concentrated under vacuum. Purification of the residue by silica gel column chromatography eluting with petroleum ether/EtOAc (PE/EA) gave the corresponding diene ligands.

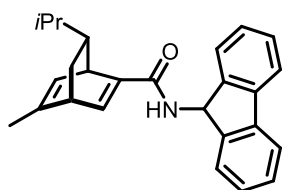

L13: Purified by silica gel column chromatography (PE:EA v/v=10:1) to obtain a white solid (105.0 mg, 59% yield).

**<sup>1</sup>H NMR (CHCl<sub>3</sub>-d, 300 MHz):** δ 7.68 (d, *J* = 7.5 Hz, 2H), 7.58 (t, *J* = 7.0 Hz, 2H), 7.42 – 7.35 (m, 2H), 7.34 – 7.26 (m, 2H), 6.78 (dd, *J* = 6.2, 1.9 Hz, 1H), 6.28 (d, *J* = 8.8 Hz,

1H), 5.95 (d, *J* = 8.9 Hz, 1H), 5.87 – 5.80 (m, 1H), 4.20 – 4.10 (m, 1H), 3.36 – 3.27 (m, 1H), 1.81 (d, *J* = 1.6 Hz, 3H), 1.59 (ddd, *J* = 11.6, 8.7, 3.0 Hz, 1H), 1.30 – 1.24 (m, 1H), 1.18 – 1.08 (m, 1H), 1.04 (d, *J* = 6.0 Hz, 3H), 0.97 (ddd, *J* = 11.5, 4.8, 2.4 Hz, 1H), 0.85 (d, *J* = 6.1 Hz, 3H); **<sup>13</sup>C NMR (CHCl<sub>3</sub>-d, 75 MHz):** δ 166.59, 144.72, 144.69, 144.62, 143.86, 140.67, 140.60, 138.75, 128.67, 127.82, 127.78, 125.34, 125.32, 124.22, 120.02, 120.00, 54.74, 47.87, 43.68, 40.16, 33.95, 31.82, 21.94, 21.51, 19.06. **HRMS (ESI+):** calcd. for C<sub>26</sub>H<sub>28</sub>NO<sup>+</sup> [M+H]<sup>+</sup> 370.2165, found 370.2171. **Optical rotation:** [α]<sub>D</sub><sup>25</sup> +10.9 (*c* 0.75, CHCl<sub>3</sub>).

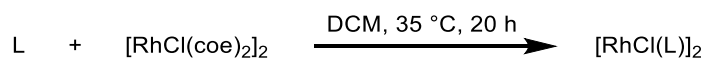

[RhCl(coe)<sub>2</sub>]<sub>2</sub> (0.11 mmol) and ligand L (0.20 mmol) were placed in a Schlenk tube under nitrogen. Dichloromethane (2.0 mL) was added and the resulting solution was stirred at 35 °C for 20 h. Upon completion, the crude mixture was concentrated under vacuum and purified by flash silica gel column chromatography eluting with petroleum ether/EtOAc (PE/EA) as eluent to give the corresponding [RhCl(L)]<sub>2</sub> as an orange solid.

## 2.2 Preparation of 1,3-diketones

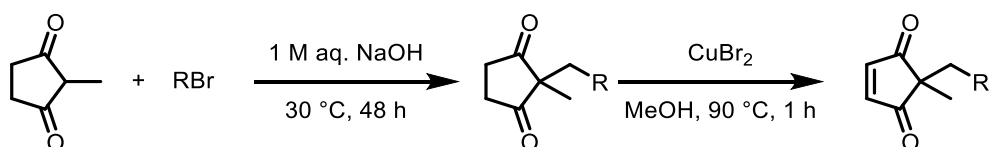

2-Methyl cyclopentane-1,3-dione (8.92 mmol, 1.0 equiv.) was taken with 10.5 mL of 1 M aq. NaOH solution and the suspension was stirred at room temperature for 10



min. To this mixture was added RBr (17.84 mmol, 2.0 equiv.) at once and the resulting biphasic solution was stirred vigorously at room temperature. After being stirred for 48 h, the reaction mixture was diluted with 20 mL of EtOAc, organic phase was separated from aqueous phase, aqueous phase was back-extracted with EtOAc (2 × 20 mL). The combined organic phase was dried over Na<sub>2</sub>SO<sub>4</sub>, filtered and concentrated under reduced pressure. The crude reaction mixture was purified by silica-gel column chromatography eluting with petroleum ether/EtOAc (PE/EA) to obtain 2,2-disubstituted cyclopentane-1,3-dione.

To a solution of 2,2-disubstituted cyclopentane-1,3-dione (1.0 mmol, 1.0 equiv.) in 7 mL MeOH was added copper(II) bromide (2.2 mmol, 2.2 equiv.) and the resulting brown solution was stirred at 90 °C under argon atmosphere for 1 h. After 1 h the reaction mixture was cooled to room temperature, quenched with 2 mL of 1 M aq. HCl solution, 20 mL of Et<sub>2</sub>O was added and the organic phase was separated from aqueous phase. Aqueous phase was back-extracted with Et<sub>2</sub>O (2 × 20 mL). The combined organic phase was dried over Na<sub>2</sub>SO<sub>4</sub>, filtered and concentrated under reduced pressure. The crude reaction mixture was purified by silica-gel column chromatography eluting with petroleum ether/EtOAc (PE/EA) to obtain 2,2-disubstituted cyclopentene-1,3-dione.

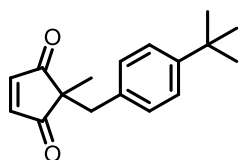

**1c:** Purified by silica gel column chromatography (PE:EA v/v=25:1) to obtain a yellow solid (32% yield in 2 steps). <sup>1</sup>H NMR (CHCl<sub>3</sub>-d, 300 MHz): δ 7.17 – 7.12 (m, 2H), 6.98 (s, 2H), 6.86 – 6.81 (m, 2H), 2.94 (s, 2H), 1.22 (s, 9H), 1.22 (s, 3H); <sup>13</sup>C NMR (CHCl<sub>3</sub>-d, 75 MHz): δ 207.47, 149.82, 148.79, 132.48, 129.42, 125.26, 52.53, 40.41, 34.41, 31.32, 19.37. HRMS (ESI<sup>+</sup>): calcd. for C<sub>17</sub>H<sub>20</sub>NaO<sub>2</sub><sup>+</sup> [M+Na]<sup>+</sup> 279.1355, found 279.1382.

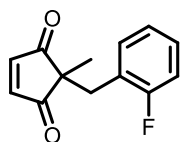

**1j:** Purified by silica gel column chromatography (PE:EA v/v=15:1) to obtain a yellow solid (45% yield in 2 steps). <sup>1</sup>H NMR (CHCl<sub>3</sub>-d, 300 MHz): δ 7.18 – 7.09 (m, 1H), 7.06 (s, 2H), 7.01 – 6.85 (m, 3H), 2.99 (d, *J* = 1.4 Hz, 2H), 1.22 (s, 3H); <sup>13</sup>C NMR (CHCl<sub>3</sub>-d, 75 MHz): δ 206.51, 162.37, 159.10 (d, *J* = 245.3 Hz), 148.44, 132.24 (d, *J* = 4.1 Hz), 129.14 (d, *J* = 8.1 Hz), 124.00 (d, *J* = 3.6 Hz), 122.54 (d, *J* = 15.9 Hz), 115.64 (d, *J* = 22.3 Hz), 51.33, 33.68 (d, *J* = 2.1 Hz), 18.72; <sup>19</sup>F NMR (CHCl<sub>3</sub>-d, 282 MHz) δ –114.98. HRMS (ESI<sup>+</sup>): calcd. for C<sub>13</sub>H<sub>12</sub>FO<sub>2</sub><sup>+</sup> [M+H]<sup>+</sup> 219.0816, found 219.0818.

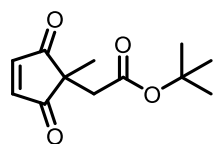

**1s:** This reaction condition needs to be modified from the standard reaction procedure. In the second step of procedure, 2,2-disubstituted cyclopentane-1,3-dione (1.0 mmol, 1.0 equiv.) in 7 mL *t*BuOH was added copper(II) bromide (12.0 mmol, 12.0 equiv.) and the resulting brown solution was stirred at 90 °C under argon atmosphere for 8 h. Purified by silica gel column chromatography (PE:EA v/v=10:1) to obtain a yellow solid (5% yield in 2 steps). **<sup>1</sup>H NMR (CHCl<sub>3</sub>-*d*, 300 MHz):** δ 7.23 (s, 2H), 2.75 (s, 2H), 1.27 (s, 9H), 1.07 (s, 3H); **<sup>13</sup>C NMR (CHCl<sub>3</sub>-*d*, 75 MHz):** δ 206.00, 169.48, 147.55, 81.87, 47.98, 39.05, 27.94, 20.68. **HRMS (ESI+):** calcd. for C<sub>12</sub>H<sub>17</sub>O<sub>4</sub><sup>+</sup> [M+H]<sup>+</sup> 225.1121, found 225.1112.

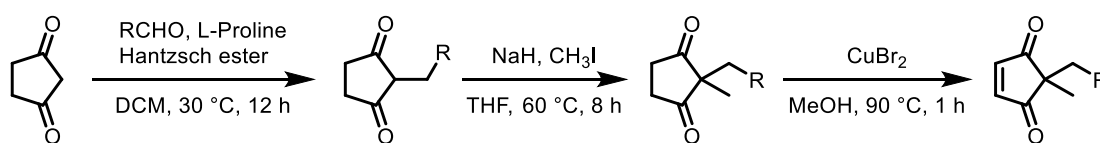

The reaction conditions of the first step are modified from reported procedures.<sup>3f</sup> To a solution of cyclopentane-1,3-dione (981 mg, 10 mmol, 1.0 equiv.), Hantzsch ester (2.78 g, 11 mmol, 1.1 equiv.), and L-proline (57.6 mg, 0.5 mmol, 0.05 equiv.) in 30 mL DCM was added aldehyde (3.37 g, 30 mmol, 3.0 equiv.) and the resulting mixture was stirred at 30 °C for 12 h. After 12 h, the mixture was concentrated to a paste under reduced pressure. The paste was filtered, washed with *n*-hexane, and the filter cake was collected, which was used for the next step without further purification. To a mixture of crude 2-substituted cyclopentane-1,3-dione in 15 mL THF was added a suspension of NaH (60%, 600 mg, 15 mmol, 1.5 equiv.) in 15 mL THF dropwise at 0 °C. The mixture was warm to room temperature and stirred for 10 min. CH<sub>3</sub>I (1.56 mL, 2.28 g, 25 mmol, 2.5 equiv.) was added to the mixture and the resulting mixture was stirred at 60 °C for 8 h. After 8 h the reaction mixture was cooled to room temperature, quenched with 5 mL water, and extracted with EtOAc (3 × 20 mL). The combined organic layer was dried over Na<sub>2</sub>SO<sub>4</sub>, filtered, and concentrated under reduced pressure. The crude reaction mixture was purified by silica-gel column chromatography eluting with petroleum ether/EtOAc (PE/EA) to obtain 2,2-disubstituted cyclopentene-1,3-dione.

To a solution of 2,2-disubstituted cyclopentane-1,3-dione (1.0 mmol, 1.0 equiv.) in 7 mL MeOH was added copper(II) bromide (2.2 mmol, 2.2 equiv.) and the resulting brown solution was stirred at 90 °C under argon atmosphere for 1 h. After 1 h the reaction mixture was cooled to room temperature, quenched with 2 mL of 1 M aq. HCl solution, 20 mL of Et<sub>2</sub>O was added and the organic phase was separated from aqueous

phase. Aqueous phase was back-extracted with Et<sub>2</sub>O (2 × 20 mL). The combined organic phase was dried over Na<sub>2</sub>SO<sub>4</sub>, filtered and concentrated under reduced pressure. The crude reaction mixture was purified by silica-gel column chromatography eluting with petroleum ether/EtOAc (PE/EA) to obtain 2,2-disubstituted cyclopentene-1,3-dione.

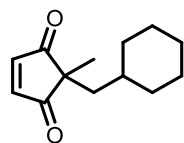

**1p:** Purified by silica gel column chromatography (PE:EA v/v=25:1) to obtain a yellow solid (36% yield in 3 steps). <sup>1</sup>H NMR (CHCl<sub>3</sub>-d, 300 MHz): δ 7.23 (s, 2H), 1.60 (d, *J* = 6.3 Hz, 2H), 1.58 – 1.46 (m, 3H), 1.41 – 1.32 (m, 2H), 1.08 (s, 3H), 1.07 – 0.93 (m, 4H), 0.84 – 0.71 (m, 2H); <sup>13</sup>C NMR (CHCl<sub>3</sub>-d, 75 MHz): δ 208.07, 148.22, 50.21, 42.29, 34.58, 34.38, 26.04, 25.96, 21.48. HRMS (ESI<sup>+</sup>): calcd. for C<sub>13</sub>H<sub>19</sub>O<sub>2</sub><sup>+</sup> [M+H]<sup>+</sup> 207.1380, found 207.1389.

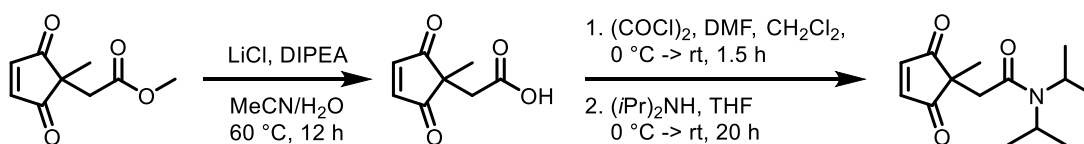

This reaction conditions of the first step are modified from reported procedures.<sup>3g</sup> To a solution of ester (315.0 mg, 1.73 mmol, 1.0 equiv.), LiCl (219.9 mg, 5.19 mmol, 3.0 equiv.) in MeCN/H<sub>2</sub>O (v/v=1:1, 40 mL) was added DIPEA (0.6 mL, 3.46 mmol, 2.0 equiv.). The mixture was stirred for 12 h at 60 °C. The solvent MeCN was removed under vacuum, and 10 mL 1 M aq. HCl solution was added to the residue. The mixture was extracted with EtOAc (3 × 30 mL). The combined organic dried over Na<sub>2</sub>SO<sub>4</sub>, filtered, and concentrated under vacuum, which was used for the next step without further purification. To a solution of carboxylic acid (290.8 mg, 1.73 mmol, 1.0 equiv.) and DMF (27 μL, 0.35 mmol, 0.2 equiv.) in CH<sub>2</sub>Cl<sub>2</sub> (4.8 mL) at 0 °C was added oxalyl chloride (293 μL, 3.46 mmol, 2.0 equiv.) dropwise over 1 min. The mixture was warm to room temperature and stirred for 1.5 h to give a solution of the corresponding acid chloride. The solvent was removed under vacuum, and the residue was dissolved in THF (4.5 mL). To a solution of the diisopropylamine (590 μL, 4.32 mmol, 2.5 equiv.) in THF (4.5 mL) was added the solution of acid chloride dropwise at 0 °C. The mixture was then stirred at room temperature for 20 h. Saturated aqueous K<sub>2</sub>CO<sub>3</sub> solution was added, and the mixture was extracted with EtOAc (3 × 20 mL). The combined organic extracts were washed with saturated aqueous NH<sub>4</sub>Cl solution, dried over Na<sub>2</sub>SO<sub>4</sub>, filtered, and concentrated under vacuum. Purification of the residue by silica gel column chromatography eluting with petroleum ether/EtOAc (PE/EA) gave the corresponding amide.

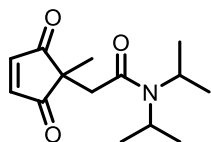

**1t:** Purified by silica gel column chromatography (PE:EA v/v=5:1) to obtain a yellow solid (66% yield in 2 steps). **<sup>1</sup>H NMR (CHCl<sub>3</sub>-*d*, 300 MHz):** δ 7.19 (s, 2H), 3.90 – 3.76 (m, 1H), 3.42 – 3.19 (m, 1H), 2.86 (s, 2H), 1.14 (dd, *J* = 6.8, 1.6 Hz, 12H), 1.06 (s, 3H); **<sup>13</sup>C NMR (CHCl<sub>3</sub>-*d*, 75 MHz):** δ 206.37, 167.76, 147.04, 48.78, 48.40, 45.68, 40.47, 20.77, 20.54, 20.37. **HRMS (ESI+):** calcd. for C<sub>14</sub>H<sub>22</sub>NO<sub>3</sub><sup>+</sup> [M+H]<sup>+</sup> 252.1594, found 252.1602.

### 3. Experimental Section

#### 3.1 Evaluation of Reaction Conditions

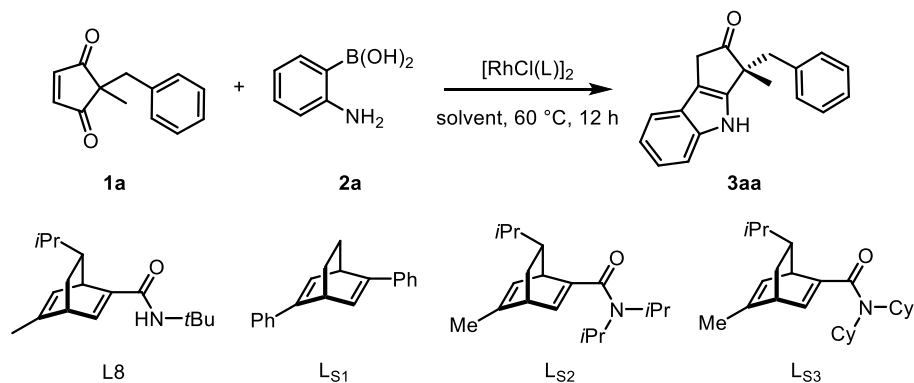

| entry | L                                          | solvent                             | result            |
|-------|--------------------------------------------|-------------------------------------|-------------------|
| 1     | $[\text{RhCl}(\text{L8})]_2$               | toluene/H <sub>2</sub> O (10:1)     | 38%, 92.5:7.5 er  |
| 2     | $[\text{RhCl}(\text{L8})]_2$               | 1,4-dioxane/H <sub>2</sub> O (10:1) | 98%, 81.5:8.5 er  |
| 3     | $[\text{RhCl}(\text{L8})]_2$               | THF/H <sub>2</sub> O (10:1)         | 98%, 82:8 er      |
| 4     | $[\text{RhCl}(\text{L8})]_2$               | EtOH                                | 98%, 93:7 er      |
| 5     | $[\text{RhCl}(\text{L}_{\text{S1}})]_2$    | EtOH                                | 92%, 85.5:14.5 er |
| 6     | $[\text{RhCl}(\text{L}_{\text{S2}})]_2$    | EtOH                                | 98%, 87.5:12.5 er |
| 7     | $[\text{RhCl}(\text{L}_{\text{S3}})]_2$    | EtOH                                | 96%, 90.5:9.5 er  |
| 8     | $[\text{RhCl}((\text{R})\text{-Binap})]_2$ | EtOH                                | 91%, 50:50 er     |

Condition: **1a** (0.10 mmol), **2a** (0.20 mmol), and Rh catalyst (3 mol% Rh), in the corresponding solvent at  $60\text{ }^\circ\text{C}$  for 12 h. Note: Cy = cyclohexyl.

#### 3.2 A General Procedure for Table 1 and Scheme 2

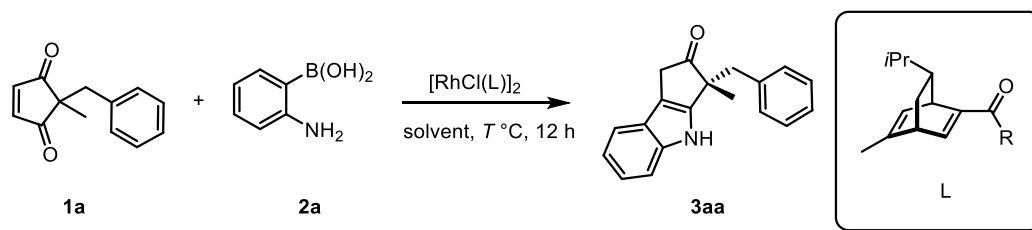

**Procedure:** **1a** (0.10 mmol), **2a** (0.20 mmol),  $[\text{RhCl}(\text{L})]_2$  (3 mol% Rh) were placed in a Schlenk tube under nitrogen. Solvent (1.0 mL) was added and the reaction mixture

was stirred at  $T$  °C for 12 h. Upon completion, aqueous HCl (0.5 mL, 1 M) was added to remove the deboronated product aniline. The reaction mixture was diluted with ethyl acetate (5 mL) and water (2 mL). The layers were separated and the aqueous layer was extracted again with ethyl acetate for two more times (5 mL  $\times$  2). The combined organic phases were concentrated in vacuo, and the residue was purified by silica gel chromatography eluting with petroleum ether/EtOAc (v/v=15:1) to give product **3aa**.

### 3.3 A General Procedure for Scheme 3

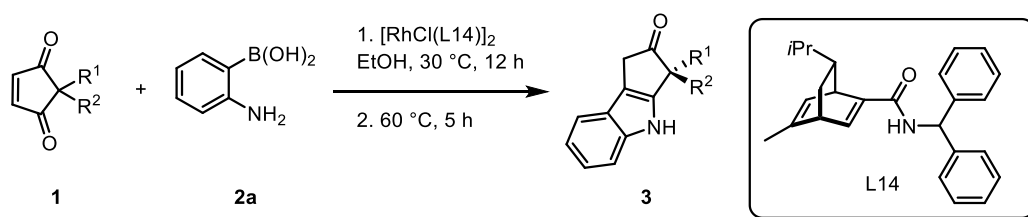

**Procedure:** **1** (0.20 mmol), **2a** (0.30 mmol),  $[\text{RhCl}(\text{L14})]_2$  (3 mol% Rh) were placed in a Schlenk tube under nitrogen. EtOH (2.0 mL) was added and the reaction mixture was stirred at 30 °C for 12 h. The reaction solution was heated and stirred at 60 °C for 5 h. Upon completion, aqueous HCl (0.5 mL, 1 M) was added to remove the deboronated product aniline. The reaction mixture was diluted with ethyl acetate (5 mL) and water (2 mL). The layers were separated and the aqueous layer was extracted again with ethyl acetate for two more times (5 mL  $\times$  2). The combined organic phases were concentrated in vacuo, and the residue was purified by silica gel chromatography eluting with petroleum ether/EtOAc to give product **3**.

### 3.4 A General Procedure for Scheme 4

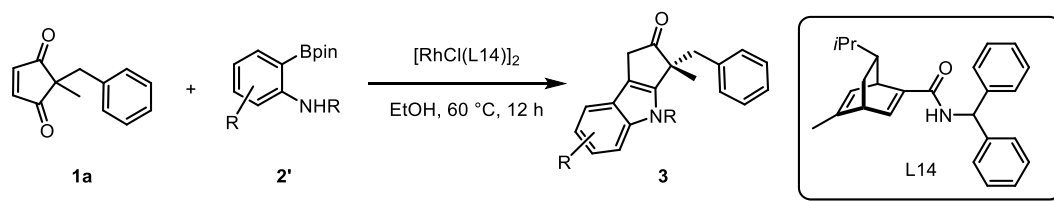

**Procedure:** **1** (0.20 mmol), **2'** (0.30 mmol),  $[\text{RhCl}(\text{L14})]_2$  (3 mol% Rh) were placed in a Schlenk tube under nitrogen. EtOH (2.0 mL) was added and the reaction mixture was stirred at 60 °C for 12 h. Upon completion, aqueous HCl (0.5 mL, 1 M) was added to remove the deboronated product aniline. The reaction mixture was diluted with ethyl acetate (5 mL) and water (2 mL). The layers were separated and the aqueous layer was extracted again with ethyl acetate for two more times (5 mL  $\times$  2). The

combined organic phases were concentrated in vacuo, and the residue was purified by silica gel chromatography eluting with petroleum ether/EtOAc to give product **3**.

### 3.5 Eyring Analysis for Reaction

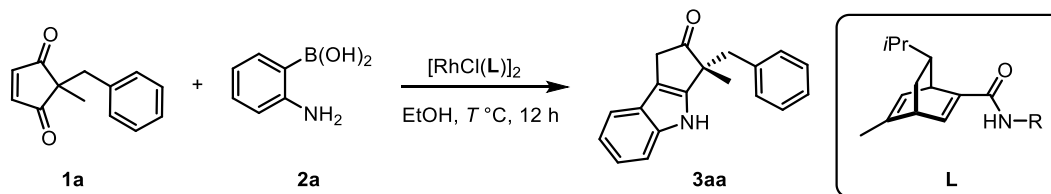

**Procedure:** **1a** (0.10 mmol), **2a** (0.20 mmol),  $[\text{RhCl}(\text{L})_2]_2$  (3 mol% Rh) were placed in a Schlenk tube under nitrogen. EtOH (1.0 mL) was added and the reaction mixture was stirred at  $T$  °C for 12 h. Upon completion, aqueous HCl (0.5 mL, 1 M) was added to remove the deboronated product aniline. The reaction mixture was diluted with ethyl acetate (5 mL) and water (2 mL). The layers were separated and the aqueous layer was extracted again with ethyl acetate for two more times (5 mL  $\times$  2). The combined organic phases were concentrated in vacuo, and the residue was purified by silica gel chromatography eluting with petroleum ether/EtOAc (v/v=15:1) to give product **3aa**. The er was determined by chiral HPLC analysis using Daicel Chiralcel IB column.

Table S1 lists the origin peak area data from HPLC analysis, and the er values are determined as  $A:(100 - A)$ . The activation parameters were calculated using  $R \ln(\text{er}) = -\Delta\Delta H^\ddagger/T + \Delta\Delta S^\ddagger$ , where  $R = 1.98720478 \text{ cal}/(\text{mol} \cdot \text{K})$ . Linear regression models were developed and evaluated using Python package Statsmodels 0.13.2. The visualizations of linear regression models were performed by Python package Matplotlib 3.5.2.<sup>8c</sup>

**Table S1: Eyring plot data**

| R                 | $A$ (100 °C) | $A$ (80 °C) | $A$ (60 °C) | $A$ (40 °C) | $A$ (30 °C) | model $R^2$ |
|-------------------|--------------|-------------|-------------|-------------|-------------|-------------|
| Me                | 86.497       | 87.596      | 89.367      | 89.977      | 90.263      | 96%         |
| <i>t</i> Bu       | 91.075       | 91.830      | 93.221      | 94.029      | 94.398      | 99%         |
| CHPh <sub>2</sub> | 92.277       | 93.020      | 94.828      | 95.554      | 96.130      | 98%         |

### 3.6 Procedures for Scheme 5

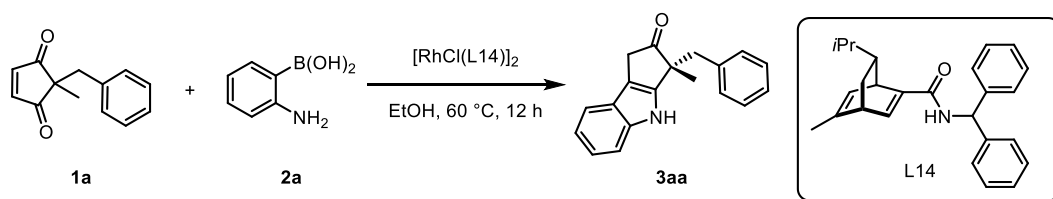

**Procedure:** **1a** (2.00 mmol), **2a** (3.00 mmol),  $[\text{RhCl}(\text{L14})]_2$  (3 mol% Rh) were placed in a Schlenk tube under nitrogen. EtOH (20.0 mL) was added and the reaction mixture was stirred at 30 °C for 12 h. The reaction solution was heated and stirred at 60 °C for 5 h. Upon completion, the reaction mixture was concentrated in vacuo, and then aqueous HCl (5 mL, 1 M) was added to the residue to remove the deboronated product aniline. The mixture was diluted with ethyl acetate (50 mL) and water (20 mL). The layers were separated and the aqueous layer was extracted again with ethyl acetate for two more times (50 mL  $\times$  2). The combined organic phases were concentrated in vacuo, and the residue was purified by silica gel chromatography eluting with petroleum ether/EtOAc (v/v=15:1) to give product **3aa**.

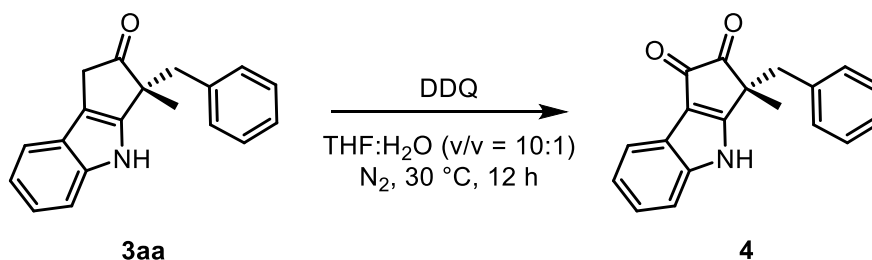

**Procedure:** **3aa** (27.5 mg, 0.10 mmol) and 2,3-dichloro-5,6-dicyano-1,4-benzoquinone (DDQ, 68.3 mg, 0.30 mmol) were placed in a Schlenk tube under nitrogen. THF:H<sub>2</sub>O (1.5 mL: 0.15 mL) was added and the reaction mixture was stirred at 30 °C for 12 h. Upon completion, saturated aqueous NaHCO<sub>3</sub> (3 mL) was added. The reaction mixture was diluted with ethyl acetate (5 mL). The layers were separated and the aqueous layer was extracted again with ethyl acetate for two more times (5 mL  $\times$  2). The combined organic phases were concentrated in vacuo, and the residue was purified by silica gel chromatography eluting with petroleum ether/EtOAc (v/v=2:1) to give the product **4**.



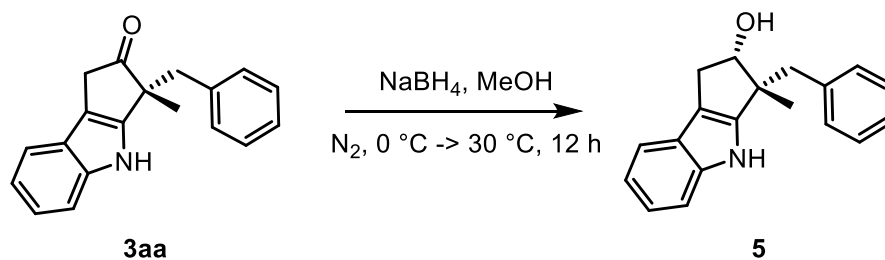

**Procedure:** **3aa** (27.5 mg, 0.10 mmol) and NaBH<sub>4</sub> (11.3 mg, 0.30 mmol) were placed in a Schlenk tube under nitrogen. MeOH (1.0 mL) was added at 0 °C, and the reaction mixture was stirred at 30 °C for 12 h. Upon completion, H<sub>2</sub>O (1 mL) was added. The reaction mixture was diluted with ethyl acetate (5 mL). The layers were separated and the aqueous layer was extracted again with ethyl acetate for two more times (5 mL × 2). The combined organic phases were concentrated in vacuo, and the residue was purified by silica gel chromatography eluting with petroleum ether/EtOAc (v/v=6:1) to give the product **5**.

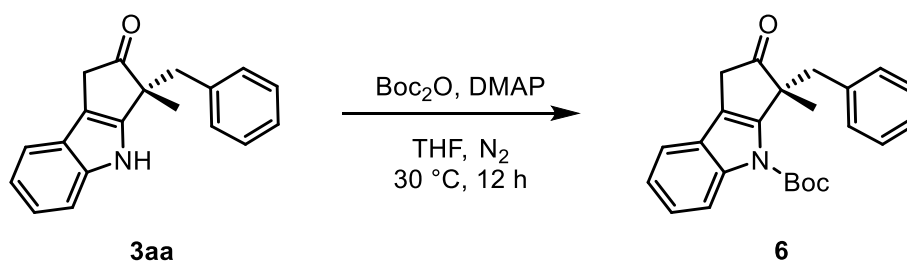

**Procedure:** **3aa** (27.5 mg, 0.10 mmol) and DMAP (18.3 mg, 0.15 mmol) were placed in a Schlenk tube under nitrogen. Boc<sub>2</sub>O (46 μL, 0.20 mmol) and THF (1 mL) was added and the reaction mixture was stirred at 30 °C for 12 h. Upon completion, the reaction mixture was concentrated in vacuo, and the residue was purified by silica gel chromatography eluting with petroleum ether/EtOAc (v/v=50:1) to give the product **6**.

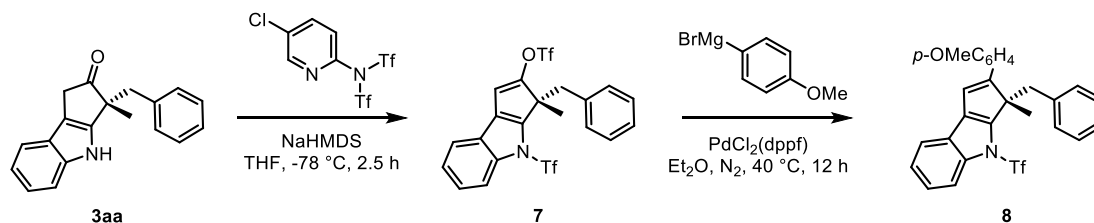

**Procedure:** **3aa** (27.5 mg, 0.10 mmol) and *N*-(5-chloro-2-pyridyl)triflimide (117.7 mg, 0.30 mmol) were placed in a Schlenk tube. Then THF (2.0 mL) was added at -78 °C and NaHMDS (2.0 M in THF, 0.30 mmol, 0.15 mL) was added dropwise and the reaction mixture was stirred at -78 °C for 2.5 h. Upon completion, saturated aqueous

---

NH<sub>4</sub>Cl (3 mL) was added. The reaction mixture was diluted with ethyl acetate (5 mL). The layers were separated and the aqueous layer was extracted again with ethyl acetate for two more times (5 mL × 2). The combined organic phases were concentrated in vacuo, and the residue was purified by silica gel chromatography eluting with petroleum ether/CH<sub>2</sub>Cl<sub>2</sub> (v/v=10:1) to give the product **7**.

**7** (54.1 mg, 0.10 mmol) and PdCl<sub>2</sub>(dppf) (5 mol%, 3.7 mg) were placed in a Schlenk tube under nitrogen. Et<sub>2</sub>O (1 mL) and *p*-OMeC<sub>6</sub>H<sub>4</sub>MgBr (1.0 M in THF, 0.30 mmol, 0.3 mL) was added, and the reaction mixture was stirred at 40 °C for 12 h. Upon completion, H<sub>2</sub>O (1 mL) was added. The reaction mixture was diluted with ethyl acetate (5 mL). The layers were separated and the aqueous layer was extracted again with ethyl acetate for two more times (5 mL × 2). The combined organic phases were concentrated in vacuo, and the residue was purified by silica gel chromatography eluting with petroleum ether/CH<sub>2</sub>Cl<sub>2</sub> (v/v=8:1) to give the product **8**.

## 4. Product Characterization

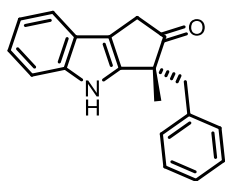

**3aa:** The reaction was carried out on a 0.20 mmol scale. Purified by silica gel column chromatography (PE:EA v/v=15:1) to obtain a white solid (54.0 mg, 98% yield, 96:4 er). **<sup>1</sup>H NMR (DMSO-*d*<sub>6</sub>, 400 MHz):** δ 11.36 (s, 1H), 7.42 (d, *J* = 8.1 Hz, 1H), 7.27 (d, *J* = 7.7 Hz, 1H), 7.09 – 7.04 (m, 1H), 7.04 – 6.99 (m, 3H), 6.97 – 6.92 (m, 1H), 6.80 – 6.74 (m, 2H), 3.26 (d, *J* = 21.3 Hz, 1H), 3.07 (s, 2H), 2.67 (d, *J* = 21.3 Hz, 1H), 1.40 (s, 3H); **<sup>13</sup>C NMR (DMSO-*d*<sub>6</sub>, 75 MHz):** δ 219.10, 144.12, 138.48, 137.13, 129.20, 127.75, 126.25, 123.79, 120.80, 118.97, 118.58, 112.00, 109.40, 52.85, 43.72, 37.95, 23.38. **HRMS (ESI+):** calcd. for C<sub>19</sub>H<sub>18</sub>NO<sup>+</sup> [M+H]<sup>+</sup> 276.1383, found 276.1389. **Optical rotation:** [α]<sup>25</sup><sub>D</sub> +31.3 (*c* 0.21, CH<sub>2</sub>Cl<sub>2</sub>) for 96:4 er (*R*). The er was determined by HPLC analysis using Daicel Chiralcel IB column (hexane/isopropanol = 95/5, 1.0 mL/min, 25 °C, 254 nm, *t*<sub>major</sub> = 16.90 min (*R*), *t*<sub>minor</sub> = 12.04 min (*S*)).

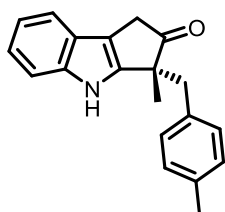

**3ba:** The reaction was carried out on a 0.20 mmol scale. Purified by silica gel column chromatography (PE:EA v/v=15:1) to obtain a white solid (57.3 mg, 99% yield, 96:4 er). **<sup>1</sup>H NMR (DMSO-*d*<sub>6</sub>, 300 MHz):** δ 11.37 (s, 1H), 7.43 (d, *J* = 8.1 Hz, 1H), 7.28 (d, *J* = 7.7 Hz, 1H), 7.12 – 7.00 (m, 1H), 7.00 – 6.92 (m, 1H), 6.83 (d, *J* = 7.8 Hz, 2H), 6.68 (d, *J* = 8.1 Hz, 2H), 3.28 (d, *J* = 21.3 Hz, 1H), 3.04 (s, 2H), 2.72 (d, *J* = 21.3 Hz, 1H), 2.10 (s, 3H), 1.40 (s, 3H); **<sup>13</sup>C NMR (DMSO-*d*<sub>6</sub>, 75 MHz):** δ 219.21, 144.29, 138.51, 135.12, 134.10, 129.13, 128.41, 123.85, 120.77, 118.97, 118.61, 112.03, 109.36, 52.91, 43.33, 38.00, 23.45, 20.54. **HRMS (ESI+):** calcd. for C<sub>20</sub>H<sub>20</sub>NO<sup>+</sup> [M+H]<sup>+</sup> 290.1539, found 290.1548. **Optical rotation:** [α]<sup>25</sup><sub>D</sub> +8.5 (*c* 0.57, CH<sub>2</sub>Cl<sub>2</sub>) for 96:4 er (*R*). The er was determined by HPLC analysis using Daicel Chiralcel IB column (hexane/isopropanol = 95/5, 1.0 mL/min, 25 °C, 254 nm, *t*<sub>major</sub> = 16.40 min (*R*), *t*<sub>minor</sub> = 10.39 min (*S*)).

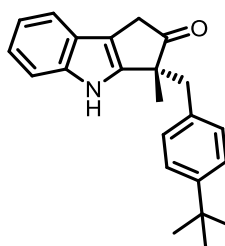

**3ca:** The reaction was carried out on a 0.20 mmol scale. Purified by silica gel column chromatography (PE:EA v/v=15:1) to obtain a white solid (65.6 mg, 99% yield, 95.5:4.5 er). **<sup>1</sup>H NMR (DMSO-*d*<sub>6</sub>, 300 MHz):** δ 11.39 (s, 1H), 7.44 (d, *J* = 8.1 Hz, 1H), 7.29 (d, *J* = 7.8 Hz, 1H), 7.12 – 7.02 (m, 3H), 7.00 – 6.92 (m, 1H), 6.79 – 6.68 (m, 2H), 3.28 (d, *J* = 21.2 Hz, 1H), 3.05 (s, 2H), 2.74 (d, *J* = 21.2 Hz, 1H), 1.39 (s, 3H), 1.14 (s, 9H); **<sup>13</sup>C NMR (DMSO-*d*<sub>6</sub>, 75**

**MHz):**  $\delta$  218.95, 148.34, 144.42, 138.54, 134.08, 129.05, 124.52, 123.91, 120.79, 119.00, 118.60, 112.06, 109.34, 52.62, 43.02, 37.90, 33.99, 31.07, 23.58. **HRMS (ESI+):** calcd. for  $C_{20}H_{20}NO_2^+$   $[M+H]^+$  306.1489, found 306.1521. **Optical rotation:**  $[\alpha]^{25}_D$   $-21.3$  ( $c$  0.66,  $CH_2Cl_2$ ) for 95.5:4.5 er (*R*). The er was determined by HPLC analysis using Daicel Chiralcel IB column (hexane/isopropanol = 95/5, 1.0 mL/min, 25 °C, 254 nm,  $t_{major}$  = 12.20 min (*R*),  $t_{minor}$  = 8.82 min (*S*)).

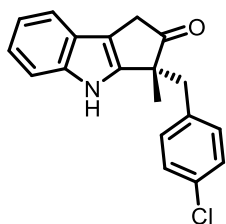

**3da:** The reaction was carried out on a 0.20 mmol scale. Purified by silica gel column chromatography (PE:EA v/v=15:1) to obtain a white solid (61.3 mg, 99% yield, 95.5:4.5 er). **<sup>1</sup>H NMR (DMSO-*d*<sub>6</sub>, 400 MHz):**  $\delta$  11.34 (s, 1H), 7.43 (d,  $J$  = 8.1 Hz, 1H), 7.30 (d,  $J$  = 7.8 Hz, 1H), 7.13 – 7.03 (m, 3H), 7.00 – 6.93 (m, 1H), 6.83 – 6.77 (m, 2H), 3.31 (d,  $J$  = 21.4 Hz,

1H), 3.07 (s, 2H), 2.78 (d,  $J$  = 21.4 Hz, 1H), 1.40 (s, 3H); **<sup>13</sup>C NMR (DMSO-*d*<sub>6</sub>, 101 MHz):**  $\delta$  218.94, 143.80, 138.48, 136.15, 131.02, 131.01, 127.76, 123.75, 120.89, 119.03, 118.64, 112.03, 109.44, 52.74, 42.77, 37.91, 23.25. **HRMS (ESI+):** calcd. for  $C_{19}H_{17}^{35}ClNO^+$   $[M+H]^+$  310.0993, found 310.0988. **Optical rotation:**  $[\alpha]^{25}_D$   $+35.4$  ( $c$  0.61,  $CH_2Cl_2$ ) for 95.5:4.5 er (*R*). The er was determined by HPLC analysis using Daicel Chiralcel IB column (hexane/isopropanol = 92/8, 1.0 mL/min, 25 °C, 254 nm,  $t_{major}$  = 14.42 min (*R*),  $t_{minor}$  = 9.14 min (*S*)).

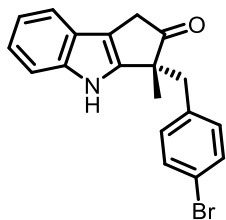

**3ea:** The reaction was carried out on a 0.20 mmol scale. Purified by silica gel column chromatography (PE:EA v/v=15:1) to obtain a white solid (70.1 mg, 99% yield, 95:5 er). **<sup>1</sup>H NMR (DMSO-*d*<sub>6</sub>, 300 MHz):** 11.36 (s, 1H), 7.43 (d,  $J$  = 8.1 Hz, 1H), 7.30 (d,  $J$  = 7.7 Hz, 1H), 7.27 – 7.19 (m, 2H), 7.12 – 7.03 (m, 1H), 7.01 – 6.91 (m, 1H), 6.80 – 6.69 (m, 2H), 3.32 (d,  $J$  = 21.4

Hz, 1H), 3.05 (s, 2H), 2.78 (d,  $J$  = 21.4 Hz, 1H), 1.39 (s, 3H); **<sup>13</sup>C NMR (DMSO-*d*<sub>6</sub>, 75 MHz):**  $\delta$  218.98, 143.81, 138.48, 136.59, 131.42, 130.71, 123.76, 120.91, 119.61, 119.05, 118.67, 112.07, 109.44, 52.70, 42.82, 37.94, 23.32. **HRMS (ESI+):** calcd. for  $C_{19}H_{17}^{79}BrNO^+$   $[M+H]^+$  354.0488, found 354.0477. **Optical rotation:**  $[\alpha]^{25}_D$   $+31.7$  ( $c$  0.64,  $CH_2Cl_2$ ) for 95:5 er (*R*). The er was determined by HPLC analysis using Daicel Chiralcel IB column (hexane/isopropanol = 95/5, 1.0 mL/min, 25 °C, 254 nm,  $t_{major}$  = 24.93 min (*R*),  $t_{minor}$  = 14.15 min (*S*)).

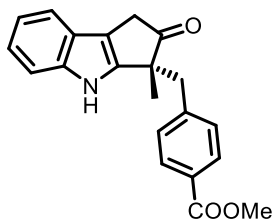

**3fa:** The reaction was carried out on a 0.20 mmol scale. Purified by silica gel column chromatography (PE:EA v/v=15:1) to obtain a white solid (65.3 mg, 98% yield, 95.5:4.5 er). **<sup>1</sup>H NMR (DMSO-*d*<sub>6</sub>, 300 MHz):** δ 11.37 (s, 1H), 7.63 (d, *J* = 8.2 Hz, 2H), 7.44 (d, *J* = 8.1 Hz, 1H), 7.27 (d, *J* = 7.8 Hz, 1H), 7.11 – 7.02 (m, 1H), 7.01 – 6.87 (m, 3H), 3.72 (s, 3H), 3.30 (d, *J* = 21.4 Hz, 1H), 3.15 (s, 2H), 2.74 (d, *J* = 21.4 Hz, 1H), 1.42 (s, 3H); **<sup>13</sup>C NMR (DMSO-*d*<sub>6</sub>, 75 MHz):** δ 218.92, 166.02, 143.73, 142.97, 138.50, 129.61, 128.69, 127.69, 123.73, 120.95, 119.05, 118.66, 112.07, 109.46, 52.83, 51.92, 43.52, 37.93, 23.36. **HRMS (ESI+):** calcd. for C<sub>21</sub>H<sub>20</sub>NO<sub>3</sub><sup>+</sup> [M+H]<sup>+</sup> 334.1438, found 334.1442. **Optical rotation:** [α]<sup>25</sup><sub>D</sub> +30.9 (*c* 0.59, CH<sub>2</sub>Cl<sub>2</sub>) for 95.5:4.5 er (*R*). The er was determined by HPLC analysis using Daicel Chiralcel IB column (hexane/isopropanol = 90/10, 1.0 mL/min, 25 °C, 254 nm, *t*<sub>major</sub> = 16.26 min (*R*), *t*<sub>minor</sub> = 10.56 min (*S*)).

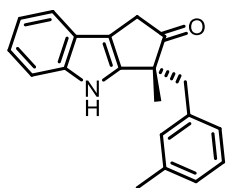

**3ga:** The reaction was carried out on a 0.20 mmol scale. Purified by silica gel column chromatography (PE:EA v/v=15:1) to obtain a white solid (55.6 mg, 96% yield, 95.5:4.5 er). **<sup>1</sup>H NMR (DMSO-*d*<sub>6</sub>, 300 MHz):** δ 11.37 (s, 1H), 7.44 (d, *J* = 8.1 Hz, 1H), 7.28 (d, *J* = 7.9 Hz, 1H), 7.12 – 7.03 (m, 1H), 7.00 – 6.79 (m, 3H), 6.62 – 6.53 (m, 2H), 3.27 (d, *J* = 21.2 Hz, 1H), 3.03 (s, 2H), 2.68 (d, *J* = 21.2 Hz, 1H), 2.02 (s, 3H), 1.41 (s, 3H); **<sup>13</sup>C NMR (DMSO-*d*<sub>6</sub>, 75 MHz):** δ 219.11, 144.21, 138.52, 137.02, 136.59, 130.03, 127.60, 126.89, 126.28, 123.84, 120.81, 118.97, 118.58, 111.97, 109.52, 52.86, 43.81, 38.00, 23.27, 20.85. **HRMS (ESI+):** calcd. for C<sub>20</sub>H<sub>20</sub>NO<sup>+</sup> [M+H]<sup>+</sup> 290.1539, found 290.1546. **Optical rotation:** [α]<sup>25</sup><sub>D</sub> +8.9 (*c* 0.55, CH<sub>2</sub>Cl<sub>2</sub>) for 95.5:4.5 er (*R*). The er was determined by HPLC analysis using Daicel Chiralcel IB column (hexane/isopropanol = 95/5, 1.0 mL/min, 25 °C, 254 nm, *t*<sub>major</sub> = 16.88 min (*R*), *t*<sub>minor</sub> = 10.89 min (*S*)).

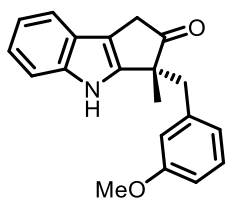

**3ha:** The reaction was carried out on a 0.20 mmol scale. Purified by silica gel column chromatography (PE:EA v/v=15:1) to obtain a white solid (59.9 mg, 98% yield, 95.5:4.5 er). **<sup>1</sup>H NMR (DMSO-*d*<sub>6</sub>, 400 MHz):** δ 11.39 (s, 1H), 7.44 (d, *J* = 8.1 Hz, 1H), 7.29 (d, *J* = 7.8 Hz, 1H), 7.11 – 7.04 (m, 1H), 7.00 – 6.92 (m, 2H), 6.61 – 6.54 (m, 1H), 6.45 – 6.37 (m, 1H), 6.29 – 6.21 (m, 1H), 3.35 (s, 3H), 3.28 (d, *J* = 21.2 Hz, 1H), 3.07 (d, *J* = 13.1 Hz, 1H), 3.03 (d, *J* = 13.0 Hz, 1H), 2.69 (d, *J* = 21.2 Hz, 1H), 1.41 (s, 3H); **<sup>13</sup>C NMR (DMSO-*d*<sub>6</sub>, 101 MHz):** δ 219.07, 158.52, 144.14,

138.64, 138.54, 128.70, 123.84, 121.57, 120.87, 119.03, 118.62, 114.29, 112.24, 111.94, 109.64, 54.36, 52.83, 43.77, 37.98, 23.36. **HRMS (ESI+)**: calcd. for  $C_{20}H_{20}NO_2^+$   $[M+H]^+$  306.1489, found 306.1495. **Optical rotation**:  $[\alpha]^{25}_D +37.8$  ( $c$  0.49,  $CH_2Cl_2$ ) for 95.5:4.5 er (*R*). The er was determined by HPLC analysis using Daicel Chiralcel IB column (hexane/isopropanol = 92/8, 1.0 mL/min, 25 °C, 254 nm,  $t_{major}$  = 14.06 min (*R*),  $t_{minor}$  = 9.97 min (*S*)).

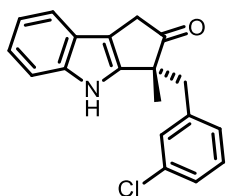

**3ia**: The reaction was carried out on a 0.20 mmol scale. Purified by silica gel column chromatography (PE:EA v/v=15:1) to obtain a white solid (60.7 mg, 98% yield, 94.5:5.5 er). **<sup>1</sup>H NMR (DMSO-*d*<sub>6</sub>, 300 MHz)**:  $\delta$  11.37 (s, 1H), 7.45 (d,  $J$  = 8.0 Hz, 1H), 7.30 (d,  $J$  = 7.8 Hz, 1H), 7.14 – 7.01 (m, 3H), 7.01 – 6.93 (m, 1H), 6.88 – 6.80 (m, 1H), 6.78 – 6.66 (m, 1H), 3.33 (d,  $J$  = 21.4 Hz, 1H), 3.08 (s, 2H), 2.78 (d,  $J$  = 21.4 Hz, 1H), 1.40 (s, 3H); **<sup>13</sup>C NMR (DMSO-*d*<sub>6</sub>, 75 MHz)**:  $\delta$  218.89, 143.72, 139.67, 138.50, 132.33, 129.59, 129.14, 127.87, 126.32, 123.75, 120.97, 119.07, 118.67, 112.03, 109.51, 52.74, 42.96, 37.93, 23.33. **HRMS (ESI+)**: calcd. for  $C_{19}H_{17}^{35}ClNO^+$   $[M+H]^+$  310.0993, found 310.0989. **Optical rotation**:  $[\alpha]^{25}_D +50.5$  ( $c$  0.49  $CH_2Cl_2$ ) for 94.5:5.5 er (*R*). The er was determined by HPLC analysis using Daicel Chiralcel IB column (hexane/isopropanol = 92/8, 1.0 mL/min, 25 °C, 254 nm,  $t_{major}$  = 14.94 min (*R*),  $t_{minor}$  = 9.60 min (*S*)).

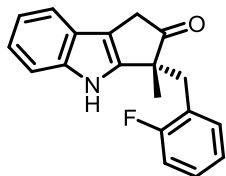

**3ja**: The reaction was carried out on a 0.20 mmol scale. Purified by silica gel column chromatography (PE:EA v/v=15:1) to obtain a white solid (52.8 mg, 93% yield, 90:10 er). **<sup>1</sup>H NMR (DMSO-*d*<sub>6</sub>, 300 MHz)**:  $\delta$  11.32 (s, 1H), 7.42 (d,  $J$  = 8.1 Hz, 1H), 7.31 (d,  $J$  = 7.8 Hz, 1H), 7.17 – 7.02 (m, 2H), 7.01 – 6.79 (m, 4H), 3.31 (d,  $J$  = 21.3 Hz, 1H), 3.14 (d,  $J$  = 13.5 Hz, 1H), 3.08 (d,  $J$  = 13.7 Hz, 1H), 2.90 (d,  $J$  = 21.3 Hz, 1H), 1.41 (s, 3H); **<sup>13</sup>C NMR (DMSO-*d*<sub>6</sub>, 75 MHz)**:  $\delta$  218.20, 160.44 (d,  $J$  = 244.7 Hz), 144.09, 138.52, 131.79 (d,  $J$  = 4.4 Hz), 128.63 (d,  $J$  = 8.2 Hz), 123.79 (d,  $J$  = 3.4 Hz), 123.77 (d,  $J$  = 15.9 Hz), 123.69, 120.90, 118.98, 118.66, 114.94 (d,  $J$  = 22.5 Hz), 112.04, 109.25, 51.96, 37.73, 36.32, 22.68; **<sup>19</sup>F NMR (DMSO-*d*<sub>6</sub>, 282 MHz)**  $\delta$  -116.29. **HRMS (ESI+)**: calcd. for  $C_{19}H_{17}FNO^+$   $[M+H]^+$  294.1289, found 294.1295. **Optical rotation**:  $[\alpha]^{25}_D +40.5$  ( $c$  0.55,  $CH_2Cl_2$ ) for 90:10 er (*R*). The er was determined by HPLC analysis using Daicel Chiralcel IB column (hexane/isopropanol = 92/8, 1.0 mL/min, 25 °C, 254 nm,  $t_{major}$  = 14.94 min (*R*),  $t_{minor}$  = 8.30 min (*S*)).

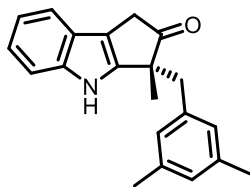

**3ka:** The reaction was carried out on a 0.20 mmol scale. Purified by silica gel column chromatography (PE:EA v/v=15:1) to obtain a white solid (60.1 mg, 99% yield, 95:5 er). **<sup>1</sup>H NMR (DMSO-*d*<sub>6</sub>, 300 MHz):** δ 11.33 (s, 1H), 7.44 (d, *J* = 8.1 Hz, 1H), 7.28 (d, *J* = 7.6 Hz, 1H), 7.12 – 7.02 (m, 1H), 7.01 – 6.90 (m, 1H), 6.63 (s, 1H), 6.35 (s, 2H), 3.26 (d, *J* = 21.2 Hz, 1H), 2.96 (s, 2H), 2.69 (d, *J* = 21.2 Hz, 1H), 1.96 (s, 6H), 1.39 (s, 3H); **<sup>13</sup>C NMR (DMSO-*d*<sub>6</sub>, 75 MHz):** δ 219.12, 144.26, 138.50, 136.87, 136.35, 127.68, 127.11, 123.83, 120.80, 118.93, 118.53, 111.89, 109.57, 52.81, 43.83, 38.00, 23.11, 20.74. **HRMS (ESI+):** calcd. for C<sub>21</sub>H<sub>22</sub>NO<sup>+</sup> [M+H]<sup>+</sup> 304.1696, found 304.1701. **Optical rotation:** [α]<sub>D</sub><sup>25</sup> +1.0 (*c* 0.61, CH<sub>2</sub>Cl<sub>2</sub>) for 95:5 er (*R*). The er was determined by HPLC analysis using Daicel Chiralcel IB column (hexane/isopropanol = 95/5, 1.0 mL/min, 25 °C, 254 nm, *t*<sub>major</sub> = 13.85 min (*R*), *t*<sub>minor</sub> = 9.05 min (*S*)).

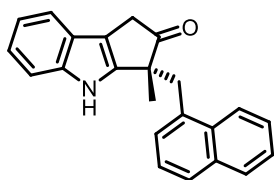

**3la:** The reaction was carried out on a 0.20 mmol scale. Purified by silica gel column chromatography (PE:EA v/v=15:1) to obtain a white solid (63.8 mg, 98% yield, 94.5:5.5 er). **<sup>1</sup>H NMR (DMSO-*d*<sub>6</sub>, 300 MHz):** δ 11.35 (s, 1H), 8.17 – 8.05 (m, 1H), 7.80 – 7.72 (m, 1H), 7.65 (d, *J* = 8.2 Hz, 1H), 7.44 – 7.34 (m, 3H), 7.25 – 7.16 (m, 2H), 7.10 – 6.98 (m, 2H), 6.92 (t, *J* = 7.3 Hz, 1H), 3.65 (d, *J* = 13.8 Hz, 1H), 3.53 (d, *J* = 13.8 Hz, 1H), 3.22 (d, *J* = 21.2 Hz, 1H), 2.66 (d, *J* = 21.2 Hz, 1H), 1.52 (s, 3H); **<sup>13</sup>C NMR (DMSO-*d*<sub>6</sub>, 75 MHz):** δ 218.91, 144.29, 138.39, 133.49, 133.14, 131.78, 128.21, 127.84, 127.05, 125.35, 125.30, 124.97, 124.26, 123.66, 120.82, 118.91, 118.55, 111.91, 109.29, 52.73, 37.96, 23.14. **HRMS (ESI+):** calcd. for C<sub>23</sub>H<sub>20</sub>NO<sup>+</sup> [M+H]<sup>+</sup> 326.1539, found 326.1543. **Optical rotation:** [α]<sub>D</sub><sup>25</sup> +55.4 (*c* 0.70, CH<sub>2</sub>Cl<sub>2</sub>) for 94.5:5.5 er (*R*). The er was determined by HPLC analysis using Daicel Chiralcel IB column (hexane/isopropanol = 90/10, 1.0 mL/min, 25 °C, 254 nm, *t*<sub>major</sub> = 12.85 min (*R*), *t*<sub>minor</sub> = 9.48 min (*S*)).

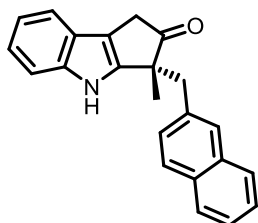

**3ma:** The reaction was carried out on a 0.20 mmol scale. Purified by silica gel column chromatography (PE:EA v/v=15:1) to obtain a white solid (63.1 mg, 97% yield, 95.5:4.5 er). **<sup>1</sup>H NMR (DMSO-*d*<sub>6</sub>, 300 MHz):** δ 11.43 (s, 1H), 7.75 – 7.68 (m, 1H), 7.66 – 7.59 (m, 1H), 7.54 (d, *J* = 8.4 Hz, 1H), 7.46 (d, *J* = 8.1 Hz, 1H), 7.41 – 7.33 (m, 3H), 7.23 (d, *J* = 7.8 Hz, 1H), 7.11 – 7.03 (m, 1H), 6.97 – 6.87 (m, 2H), 3.29 (d, *J* = 21.4 Hz, 3H), 3.26 (s, 2H), 2.69 (d, *J* = 21.4 Hz, 1H), 1.46 (s, 3H); **<sup>13</sup>C NMR (DMSO-*d*<sub>6</sub>, 75 MHz):** δ

219.11, 144.14, 138.52, 134.96, 132.63, 131.57, 127.77, 127.69, 127.35, 127.06, 125.90, 125.46, 123.76, 120.86, 118.99, 118.60, 112.01, 109.41, 52.95, 43.84, 37.96, 23.37. **HRMS (ESI+)**: calcd. for C<sub>23</sub>H<sub>20</sub>NO<sup>+</sup> [M+H]<sup>+</sup> 326.1539, found 326.1542. **Optical rotation**: [ $\alpha$ ]<sub>D</sub><sup>25</sup> +32.2 (*c* 0.43, CH<sub>2</sub>Cl<sub>2</sub>) for 95.5:4.5 er (*R*). The er was determined by HPLC analysis using Daicel Chiralcel IB column (hexane/isopropanol = 92/8, 1.0 mL/min, 25 °C, 254 nm, *t*<sub>major</sub> = 16.19 min (*R*), *t*<sub>minor</sub> = 11.10 min (*S*)).

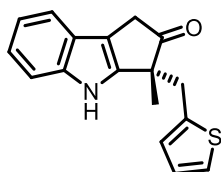

**3na**: The reaction was carried out on a 0.20 mmol scale. Purified by silica gel column chromatography (PE:EA v/v=15:1) to obtain a white solid (50.1 mg, 89% yield, 93.5:6.5 er). **<sup>1</sup>H NMR (DMSO-*d*<sub>6</sub>, 400 MHz)**:  $\delta$  11.36 (s, 1H), 7.44 (d, *J* = 8.1 Hz, 1H), 7.34 (d, *J* = 7.8 Hz, 1H), 7.14 – 7.04 (m, 2H), 7.03 – 6.94 (m, 1H), 6.75 – 6.68 (m, 1H), 6.52 – 6.46 (m, 1H), 3.38 (d, *J* = 21.3 Hz, 1H), 3.35 (d, *J* = 14.4 Hz, 1H), 3.30 (d, *J* = 14.4 Hz, 1H), 2.90 (d, *J* = 21.3 Hz, 1H), 1.40 (s, 3H); **<sup>13</sup>C NMR (DMSO-*d*<sub>6</sub>, 101 MHz)**:  $\delta$  218.91, 143.83, 138.78, 138.53, 126.36, 126.30, 124.74, 123.90, 120.91, 119.01, 118.67, 112.05, 110.04, 52.65, 37.96, 37.34, 23.34. **HRMS (ESI+)**: calcd. for C<sub>17</sub>H<sub>16</sub>NOS<sup>+</sup> [M+H]<sup>+</sup> 282.0947, found 282.0945. **Optical rotation**: [ $\alpha$ ]<sub>D</sub><sup>25</sup> +31.9 (*c* 0.48, CH<sub>2</sub>Cl<sub>2</sub>) for 93.5:6.5 er (*R*). The er was determined by HPLC analysis using Daicel Chiralcel IB column (hexane/isopropanol = 85/15, 1.0 mL/min, 25 °C, 254 nm, *t*<sub>major</sub> = 10.32 min (*R*), *t*<sub>minor</sub> = 6.73 min (*S*)).

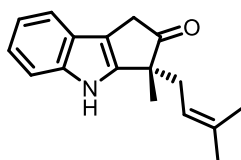

**3oa**: The reaction was carried out on a 0.20 mmol scale. Purified by silica gel column chromatography (PE:EA v/v=15:1) to obtain a white solid (48.1 mg, 95% yield, 87:13 er). **<sup>1</sup>H NMR (DMSO-*d*<sub>6</sub>, 400 MHz)**:  $\delta$  11.22 (s, 1H), 7.44 – 7.35 (m, 2H), 7.11 – 7.05 (m, 1H), 7.04 – 6.97 (m, 1H), 4.82 (t, *J* = 4.2 Hz, 1H), 3.43 (d, *J* = 21.2 Hz, 1H), 3.31 (d, *J* = 21.2 Hz, 1H), 2.49 – 2.35 (m, 2H), 1.52 (s, 3H), 1.48 (s, 3H), 1.28 (s, 3H); **<sup>13</sup>C NMR (DMSO-*d*<sub>6</sub>, 101 MHz)**:  $\delta$  219.31, 145.09, 138.51, 133.84, 123.94, 120.76, 119.03, 118.97, 118.63, 111.97, 108.87, 51.01, 37.84, 36.24, 25.64, 22.25, 17.59. **HRMS (ESI+)**: calcd. for C<sub>17</sub>H<sub>20</sub>NO<sup>+</sup> [M+H]<sup>+</sup> 254.1539, found 254.1538. **Optical rotation**: [ $\alpha$ ]<sub>D</sub><sup>25</sup> +2.7 (*c* 0.52, CH<sub>2</sub>Cl<sub>2</sub>) for 87:13 er (*R*). The er was determined by HPLC analysis using Daicel Chiralcel IB column (hexane/isopropanol = 95/5, 1.0 mL/min, 25 °C, 254 nm, *t*<sub>major</sub> = 14.06 min (*R*), *t*<sub>minor</sub> = 8.20 min (*S*)).



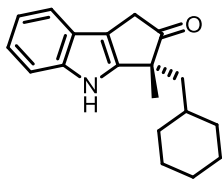

**3pa:** The reaction was carried out on a 0.20 mmol scale. Purified by silica gel column chromatography (PE:EA v/v=20:1) to obtain a white solid (53.5 mg, 95% yield, 93:7 er). **<sup>1</sup>H NMR (DMSO-*d*<sub>6</sub>, 300 MHz):** δ 11.27 (s, 1H), 7.48 – 7.35 (m, 2H), 7.13 – 7.04 (m, 1H), 7.04 – 6.96 (m, 1H), 3.51 (d, *J* = 21.3 Hz, 1H), 3.43 (d, *J* = 21.3 Hz, 1H), 1.75 (d, *J* = 6.1 Hz, 2H), 1.53 – 1.38 (m, 3H), 1.35 – 1.26 (m, 2H), 1.23 (s, 3H), 1.05 – 0.67 (m, 6H); **<sup>13</sup>C NMR (DMSO-*d*<sub>6</sub>, 75 MHz):** δ 219.88, 145.40, 138.51, 124.04, 120.71, 119.01, 118.65, 112.01, 108.62, 50.38, 45.01, 37.84, 34.62, 33.69, 33.58, 25.68, 25.58, 25.56, 25.15. **HRMS (ESI+):** calcd. for C<sub>19</sub>H<sub>24</sub>NO<sup>+</sup> [M+H]<sup>+</sup> 282.1852, found 282.1856. **Optical rotation:** [α]<sup>25</sup><sub>D</sub> +14.5 (*c* 0.55, CH<sub>2</sub>Cl<sub>2</sub>) for 93:7 er (*R*). The er was determined by HPLC analysis using Daicel Chiralcel IB column (hexane/isopropanol = 95/5, 1.0 mL/min, 25 °C, 254 nm, *t*<sub>major</sub> = 13.28 min (*R*), *t*<sub>minor</sub> = 8.08 min (*S*)).

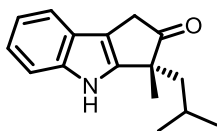

**3qa:** The reaction was carried out on a 0.20 mmol scale. Purified by silica gel column chromatography (PE:EA v/v=20:1) to obtain a white solid (44.4 mg, 92% yield, 91.5:8.5 er). **<sup>1</sup>H NMR (DMSO-*d*<sub>6</sub>, 400 MHz):** δ 11.27 (s, 1H), 7.46 – 7.34 (m, 2H), 7.10 – 7.04 (m, 1H), 7.04 – 6.97 (m, 1H), 3.51 (d, *J* = 21.5 Hz, 1H), 3.44 (d, *J* = 21.4 Hz, 1H), 1.82 – 1.70 (m, 2H), 1.32 – 1.25 (m, 1H), 1.24 (s, 3H), 0.61 (dd, *J* = 6.6, 3.1 Hz, 6H); **<sup>13</sup>C NMR (DMSO-*d*<sub>6</sub>, 101 MHz):** δ 220.03, 145.20, 138.49, 124.01, 120.74, 119.01, 118.59, 111.94, 108.78, 50.61, 46.41, 37.87, 25.53, 25.10, 23.50, 23.49. **HRMS (ESI+):** calcd. for C<sub>16</sub>H<sub>20</sub>NO<sup>+</sup> [M+H]<sup>+</sup> 242.1539, found 242.1539. **Optical rotation:** [α]<sup>25</sup><sub>D</sub> +6.3 (*c* 0.46, CH<sub>2</sub>Cl<sub>2</sub>) for 91.5:8.5 er (*R*). The er was determined by HPLC analysis using Daicel Chiralcel IB column (hexane/isopropanol = 95/5, 1.0 mL/min, 25 °C, 254 nm, *t*<sub>major</sub> = 13.22 min (*R*), *t*<sub>minor</sub> = 8.21 min (*S*)).

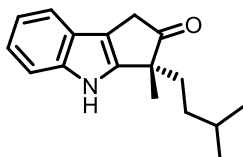

**3ra:** The reaction was carried out on a 0.20 mmol scale. Purified by silica gel column chromatography (PE:EA v/v=20:1) to obtain a white solid (48.0 mg, 94% yield, 84.5:15.5 er). **<sup>1</sup>H NMR (DMSO-*d*<sub>6</sub>, 300 MHz):** δ 11.25 (s, 1H), 7.46 – 7.35 (m, 2H), 7.12 – 7.04 (m, 1H), 7.04 – 6.97 (m, 1H), 3.48 (d, *J* = 21.4 Hz, 1H), 3.37 (d, *J* = 21.4 Hz, 1H), 1.74 (t, *J* = 8.5 Hz, 2H), 1.42 – 1.31 (m, 1H), 1.28 (s, 3H), 0.93 – 0.78 (m, 2H), 0.75 (dd, *J* = 6.6, 1.3 Hz, 6H); **<sup>13</sup>C NMR (DMSO-*d*<sub>6</sub>, 75 MHz):** δ 220.01, 145.21, 138.51, 124.02, 120.75, 119.05, 118.60, 112.00, 108.94, 50.88, 38.01, 35.67, 33.84, 27.81, 23.07, 22.39, 22.28. **HRMS (ESI+):** calcd. for C<sub>17</sub>H<sub>22</sub>NO<sup>+</sup> [M+H]<sup>+</sup> 256.1696, found 256.1702. **Optical rotation:** [α]<sup>25</sup><sub>D</sub> +0.2

(*c* 0.47, CH<sub>2</sub>Cl<sub>2</sub>) for 84.5:15.5 er (*R*). The er was determined by HPLC analysis using Daicel Chiralcel IB column (hexane/isopropanol = 95/5, 1.0 mL/min, 25 °C, 254 nm, *t*<sub>major</sub> = 13.92 min (*R*), *t*<sub>minor</sub> = 7.58 min (*S*)).

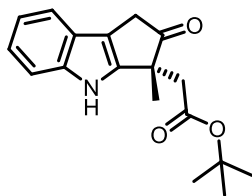

**3sa:** The reaction was carried out on a 0.20 mmol scale. Purified by silica gel column chromatography (PE:EA v/v=15:1) to obtain a white solid (47.9 mg, 80% yield, 85:15 er). **<sup>1</sup>H NMR (DMSO-*d*<sub>6</sub>, 400 MHz):** δ 11.20 (s, 1H), 7.46 – 7.38 (m, 2H), 7.11 – 7.05 (m, 1H), 7.04 – 6.97 (m, 1H), 3.50 (d, *J* = 21.0 Hz, 1H), 3.42 (d, *J* = 21.0 Hz, 1H), 2.86 (d, *J* = 15.3 Hz, 1H), 2.75 (d, *J* = 15.3 Hz, 1H), 1.27 (s, 3H), 1.05 (s, 9H); **<sup>13</sup>C NMR (DMSO-*d*<sub>6</sub>, 101 MHz):** δ 217.56, 169.07, 143.70, 138.35, 123.97, 120.85, 119.04, 118.57, 111.94, 109.47, 80.02, 48.27, 43.32, 37.59, 27.23, 23.64. **HRMS (ESI+):** calcd. for C<sub>18</sub>H<sub>22</sub>NO<sub>3</sub><sup>+</sup> [M+H]<sup>+</sup> 300.1594, found 300.1599. **Optical rotation:** [α]<sup>25</sup><sub>D</sub> –32.1 (*c* 0.41, CH<sub>2</sub>Cl<sub>2</sub>) for 85:15 er (*R*). The er was determined by HPLC analysis using Daicel Chiralcel IB column (hexane/isopropanol = 95/5, 1.0 mL/min, 25 °C, 254 nm, *t*<sub>major</sub> = 7.39 min (*R*), *t*<sub>minor</sub> = 5.76 min (*S*)).

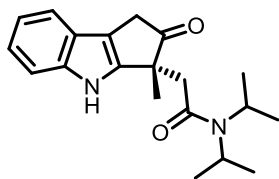

**3ta:** The reaction was carried out on a 0.20 mmol scale. Purified by silica gel column chromatography (PE:EA v/v=10:1) to obtain a white solid (37.2 mg, 57% yield, 97:3 er). **<sup>1</sup>H NMR (DMSO-*d*<sub>6</sub>, 300 MHz):** δ 10.98 (s, 1H), 7.43 – 7.33 (m, 2H), 7.07 – 6.94 (m, 2H), 4.07 – 3.92 (m, 1H), 3.53 (d, *J* = 20.4 Hz, 1H), 3.31 (d, *J* = 20.4 Hz, 1H), 3.33 – 3.25 (m, 1H), 3.13 (d, *J* = 16.0 Hz, 1H), 2.79 (d, *J* = 15.9 Hz, 1H), 1.25 (s, 3H), 1.11 (t, *J* = 7.1 Hz, 6H), 1.03 (d, *J* = 6.6 Hz, 3H), 0.86 (d, *J* = 6.7 Hz, 3H); **<sup>13</sup>C NMR (DMSO-*d*<sub>6</sub>, 75 MHz):** δ 217.89, 167.95, 145.09, 138.14, 124.28, 120.38, 118.88, 118.51, 111.96, 109.43, 48.36, 48.14, 44.55, 42.95, 37.75, 23.78, 20.71, 20.53, 20.48, 20.28. **HRMS (ESI+):** calcd. for C<sub>20</sub>H<sub>27</sub>N<sub>2</sub>O<sub>2</sub><sup>+</sup> [M+H]<sup>+</sup> 327.2067, found 327.2073. **Optical rotation:** [α]<sup>25</sup><sub>D</sub> –18.4 (*c* 0.29, CH<sub>2</sub>Cl<sub>2</sub>) for 97:3 er (*R*). The er was determined by HPLC analysis using Daicel Chiralcel IB column (hexane/isopropanol = 98.5/1.5, 1.0 mL/min, 25 °C, 254 nm, *t*<sub>major</sub> = 8.76 min (*R*), *t*<sub>minor</sub> = 8.07 min (*S*)).

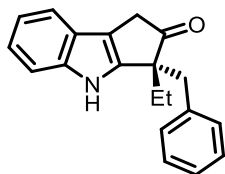

**3ua:** The reaction was carried out on a 0.20 mmol scale. Purified by silica gel column chromatography (PE:EA v/v=15:1) to obtain a white solid (53.8 mg, 93% yield, 84.5:15.5 er). **<sup>1</sup>H NMR (DMSO-*d*<sub>6</sub>, 400 MHz):** δ 11.39 (s, 1H), 7.45 (d, *J* = 8.1 Hz, 1H), 7.28 (d, *J* = 7.8 Hz, 1H), 7.11 – 7.03 (m, 1H), 7.03 –

6.90 (m, 4H), 6.84 – 6.72 (m, 2H), 3.17 (d,  $J = 21.4$  Hz, 1H), 3.10 (d,  $J = 13.1$  Hz, 1H), 3.04 (d,  $J = 13.1$  Hz, 1H), 2.65 (d,  $J = 21.4$  Hz, 1H), 1.92 (q,  $J = 7.4$  Hz, 2H), 0.59 (t,  $J = 7.4$  Hz, 3H);  $^{13}\text{C}$  NMR (DMSO- $d_6$ , 101 MHz):  $\delta$  219.64, 142.21, 138.76, 137.04, 129.27, 127.71, 126.17, 123.79, 120.78, 118.92, 118.54, 111.99, 111.06, 58.44, 42.90, 30.37, 9.42. HRMS (ESI+): calcd. for  $\text{C}_{20}\text{H}_{20}\text{NO}^+$   $[\text{M}+\text{H}]^+$  290.1539, found 290.1554. **Optical rotation:**  $[\alpha]^{25}_{\text{D}} +36.9$  ( $c$  0.27,  $\text{CH}_2\text{Cl}_2$ ) for 84.5:15.5 er ( $R$ ). The er was determined by HPLC analysis using Daicel Chiralcel IB column (hexane/isopropanol = 92/8, 0.5 mL/min, 25 °C, 254 nm,  $t_{\text{major}} = 17.67$  min ( $R$ ),  $t_{\text{minor}} = 16.01$  min ( $S$ )).

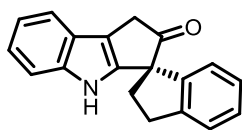

**3va:** The reaction was carried out on a 0.20 mmol scale. Purified by silica gel column chromatography (PE:EA v/v=15:1) to obtain a white solid (45.9 mg, 84% yield, 78.5:21.5 er).  $^1\text{H}$  NMR (DMSO- $d_6$ , 400 MHz):  $\delta$  11.25 (s, 1H), 7.51 (d,  $J = 7.2$  Hz, 1H), 7.37 (dd,  $J = 11.4, 7.7$  Hz, 2H), 7.28 – 7.21 (m, 1H), 7.15 – 7.02 (m, 3H), 6.71 (d,  $J = 7.2$  Hz, 1H), 3.71 (d,  $J = 21.2$  Hz, 1H), 3.57 (d,  $J = 21.2$  Hz, 1H), 3.29 – 3.13 (m, 2H), 2.56 – 2.47 (m, 1H), 2.46 – 2.36 (m, 1H);  $^{13}\text{C}$  NMR (DMSO- $d_6$ , 101 MHz):  $\delta$  216.84, 144.24, 144.18, 143.58, 138.77, 127.73, 126.69, 124.94, 123.81, 123.37, 121.28, 119.24, 118.85, 112.10, 110.70, 62.74, 37.41, 35.39, 30.89. HRMS (ESI+): calcd. for  $\text{C}_{19}\text{H}_{16}\text{NO}^+$   $[\text{M}+\text{H}]^+$  274.1226, found 274.1230. **Optical rotation:**  $[\alpha]^{25}_{\text{D}} +33.9$  ( $c$  0.45,  $\text{CH}_2\text{Cl}_2$ ) for 78.5:21.5 er ( $R$ ). The er was determined by HPLC analysis using Daicel Chiralcel IB column (hexane/isopropanol = 95/5, 1.0 mL/min, 25 °C, 254 nm,  $t_{\text{major}} = 16.63$  min ( $R$ ),  $t_{\text{minor}} = 13.45$  min ( $S$ )).

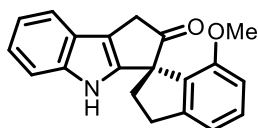

**3wa:** The reaction was carried out on a 0.20 mmol scale. Purified by silica gel column chromatography (PE:EA v/v=6:1) to obtain a white solid (59.5 mg, 98% yield, 99:1 er).  $^1\text{H}$  NMR (DMSO- $d_6$ , 400 MHz):  $\delta$  11.11 (s, 1H), 7.49 (d,  $J = 7.8$  Hz, 1H), 7.33 (d,  $J = 7.9$  Hz, 1H), 7.23 (t,  $J = 7.8$  Hz, 1H), 7.12 – 7.06 (m, 1H), 7.06 – 7.01 (m, 1H), 6.97 (d,  $J = 7.5$  Hz, 1H), 6.70 (d,  $J = 8.2$  Hz, 1H), 3.71 (d,  $J = 20.7$  Hz, 1H), 3.52 (d,  $J = 20.7$  Hz, 4H), 3.47 – 3.40 (m, 1H), 3.11 – 2.99 (m, 1H), 2.55 – 2.44 (m, 1H), 2.27 – 2.17 (m, 1H);  $^{13}\text{C}$  NMR (DMSO- $d_6$ , 101 MHz):  $\delta$  217.83, 155.20, 146.35, 143.79, 138.53, 132.08, 129.60, 123.87, 120.88, 119.06, 118.75, 117.00, 111.98, 109.49, 109.05, 60.88, 55.38, 37.99, 36.95, 31.24. HRMS (ESI+): calcd. for  $\text{C}_{20}\text{H}_{18}\text{NO}_2^+$   $[\text{M}+\text{H}]^+$  304.1332, found 304.1342. **Optical rotation:**  $[\alpha]^{25}_{\text{D}} -44.2$  ( $c$  0.59,  $\text{CH}_2\text{Cl}_2$ ) for 99:1 er ( $R$ ). The er was determined by HPLC analysis using Daicel Chiralcel IB column (hexane/isopropanol = 92/8, 1.0 mL/min, 25 °C, 254 nm,  $t_{\text{major}} = 14.27$  min ( $R$ ),  $t_{\text{minor}} = 9.71$  min ( $S$ )).

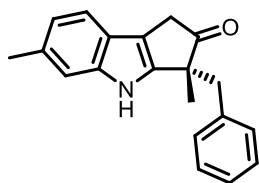

**3ab:** The reaction was carried out on a 0.20 mmol scale. Purified by silica gel column chromatography (PE:EA v/v=15:1) to obtain a white solid (56.7 mg, 98% yield, 94:6 er). **<sup>1</sup>H NMR (DMSO-*d*<sub>6</sub>, 400 MHz):** δ 11.18 (s, 1H), 7.21 (s, 1H), 7.14 (d, *J* = 8.0 Hz, 1H), 7.05 – 6.98 (m, 3H), 6.80 – 6.72 (m, 3H), 3.22 (d, *J* = 21.2 Hz, 1H), 3.05 (s, 2H), 2.61 (d, *J* = 21.2 Hz, 1H), 2.39 (s, 3H), 1.39 (s, 3H); **<sup>13</sup>C NMR (DMSO-*d*<sub>6</sub>, 101 MHz):** δ 219.16, 143.34, 138.91, 137.15, 129.79, 129.17, 127.70, 126.18, 121.71, 120.58, 118.22, 111.95, 109.17, 52.80, 43.74, 37.98, 23.38, 21.39. **HRMS (ESI+):** calcd. for C<sub>20</sub>H<sub>20</sub>NO<sup>+</sup> [M+H]<sup>+</sup> 290.1539, found 290.1548. **Optical rotation:** [α]<sup>25</sup><sub>D</sub> +41.9 (*c* 0.30, CH<sub>2</sub>Cl<sub>2</sub>) for 94:6 er (*R*). The er was determined by HPLC analysis using Daicel Chiralcel IB column (hexane/isopropanol = 95/5, 1.0 mL/min, 25 °C, 254 nm, *t*<sub>major</sub> = 11.47 min (*R*), *t*<sub>minor</sub> = 10.55 min (*S*)).

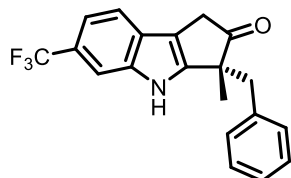

**3ac:** The reaction was carried out on a 0.20 mmol scale. Purified by silica gel column chromatography (PE:EA v/v=15:1) to obtain a white solid (61.1 mg, 89% yield, 94:6 er). **<sup>1</sup>H NMR (DMSO-*d*<sub>6</sub>, 400 MHz):** δ 11.89 (s, 1H), 7.77 (s, 1H), 7.46 (d, *J* = 8.3 Hz, 1H), 7.25 (dd, *J* = 8.4, 1.7 Hz, 1H), 7.05 – 6.99 (m, 3H), 6.81 – 6.74 (m, 2H), 3.33 (d, *J* = 21.3 Hz, 1H), 3.12 (d, *J* = 13.3 Hz, 1H), 3.08 (d, *J* = 13.3 Hz, 1H), 2.71 (d, *J* = 21.3 Hz, 1H), 1.42 (s, 3H); **<sup>13</sup>C NMR (DMSO-*d*<sub>6</sub>, 101 MHz):** δ 218.92, 148.18, 137.68, 137.31, 129.58, 128.30, 126.82, 126.61, 125.96 (q, *J* = 272.5 Hz), 121.55 (q, *J* = 31.2 Hz), 119.67, 115.86 (q, *J* = 3.8 Hz), 110.48, 109.68 (q, *J* = 4.7 Hz), 53.57, 44.07, 38.22, 23.51; **<sup>19</sup>F NMR (DMSO-*d*<sub>6</sub>, 282 MHz)** δ -58.59. **HRMS (ESI+):** calcd. for C<sub>20</sub>H<sub>17</sub>F<sub>3</sub>NO<sup>+</sup> [M+H]<sup>+</sup> 344.1257, found 344.1255. **Optical rotation:** [α]<sup>25</sup><sub>D</sub> +67.4 (*c* 0.14, CH<sub>2</sub>Cl<sub>2</sub>) for 94:6 er (*R*). The er was determined by HPLC analysis using Daicel Chiralcel IB column (hexane/isopropanol = 95/5, 1.0 mL/min, 25 °C, 254 nm, *t*<sub>major</sub> = 10.53 min (*R*), *t*<sub>minor</sub> = 11.90 min (*S*)).

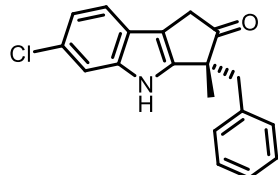

**3ad:** The reaction was carried out on a 0.20 mmol scale. Purified by silica gel column chromatography (PE:EA v/v=15:1) to obtain a white solid (47.7 mg, 77% yield, 94:6 er). **<sup>1</sup>H NMR (DMSO-*d*<sub>6</sub>, 400 MHz):** δ 11.56 (s, 1H), 7.48 (d, *J* = 1.9 Hz, 1H), 7.27 (d, *J* = 8.4 Hz, 1H), 7.04 – 7.00 (m, 3H), 6.96 (dd, *J* = 8.4, 1.9 Hz, 1H), 6.78 – 6.74 (m, 2H), 3.26 (d, *J* = 21.3 Hz, 1H), 3.08 (d, *J* = 13.0 Hz, 1H), 3.04 (d, *J* = 13.2 Hz, 1H), 2.64 (d, *J* = 21.3 Hz, 1H), 1.40 (s, 3H); **<sup>13</sup>C NMR (DMSO-*d*<sub>6</sub>, 101 MHz):** δ 218.69, 145.30, 138.80,

136.98, 129.16, 127.79, 126.31, 125.49, 122.57, 119.78, 119.28, 111.72, 109.73, 53.04, 43.67, 37.87, 23.14. **HRMS (ESI+)**: calcd. for  $C_{19}H_{16}^{35}ClKNO^+$   $[M+K]^+$  348.0552, found 348.0578. **Optical rotation**:  $[\alpha]_D^{25} +46.1$  ( $c$  0.14,  $CH_2Cl_2$ ) for 94:6 er ( $R$ ). The er was determined by HPLC analysis using Daicel Chiralcel IF column (hexane/isopropanol = 95/5, 1.0 mL/min, 25 °C, 254 nm,  $t_{major}$  = 6.42 min ( $R$ ),  $t_{minor}$  = 6.96 min ( $S$ )).

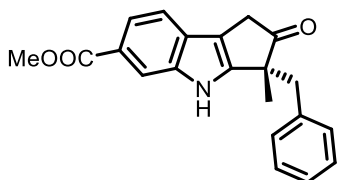

**3ae**: The reaction was carried out on a 0.20 mmol scale. Purified by silica gel column chromatography (PE:EA v/v=5:1) to obtain a white solid (64.0 mg, 96% yield, 94.5:5.5 er).  **$^1H$  NMR (DMSO- $d_6$ , 400 MHz)**:  $\delta$  11.81 (s, 1H), 8.08 (s, 1H), 7.60 (dd,  $J$  = 8.4, 1.5 Hz, 1H), 7.35 (d,  $J$  = 8.3 Hz, 1H), 7.05 – 6.99 (m, 3H), 6.81 – 6.75 (m, 2H), 3.85 (s, 3H), 3.32 (d,  $J$  = 21.3 Hz, 1H), 3.09 (s, 2H), 2.71 (d,  $J$  = 21.3 Hz, 1H), 1.43 (s, 3H);  **$^{13}C$  NMR (DMSO- $d_6$ , 101 MHz)**:  $\delta$  218.42, 167.21, 148.31, 137.71, 136.81, 129.13, 127.81, 127.13, 126.36, 121.74, 119.92, 118.30, 113.72, 110.19, 53.08, 51.75, 43.70, 37.73, 22.99. **HRMS (ESI+)**: calcd. for  $C_{21}H_{20}NO_3^+$   $[M+H]^+$  334.1438, found 334.1449. **Optical rotation**:  $[\alpha]_D^{25} +92.3$  ( $c$  0.31,  $CH_2Cl_2$ ) for 94.5:5.5 er ( $R$ ). The er was determined by HPLC analysis using Daicel Chiralcel IA column (hexane/isopropanol = 96/4, 1.0 mL/min, 25 °C, 254 nm,  $t_{major}$  = 20.49 min ( $R$ ),  $t_{minor}$  = 15.11 min ( $S$ )).

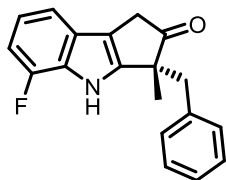

**3af**: The reaction was carried out on a 0.20 mmol scale. Purified by silica gel column chromatography (PE:EA v/v=15:1) to obtain a white solid (43.4 mg, 74% yield, 94.5:5.5 er).  **$^1H$  NMR (DMSO- $d_6$ , 300 MHz)**:  $\delta$  11.86 (s, 1H), 7.12 – 6.98 (m, 4H), 6.96 – 6.86 (m, 2H), 6.81 – 6.72 (m, 2H), 3.28 (d,  $J$  = 21.3 Hz, 1H), 3.12 (d,  $J$  = 13.1 Hz, 1H), 3.06 (d,  $J$  = 13.1 Hz, 1H), 2.63 (d,  $J$  = 21.3 Hz, 1H), 1.42 (s, 3H);  **$^{13}C$  NMR (DMSO- $d_6$ , 75 MHz)**:  $\delta$  219.19, 149.89 (d,  $J$  = 240.6 Hz), 145.76, 137.50, 129.55, 128.25, 127.98 (d,  $J$  = 6.0 Hz), 126.75, 126.26 (d,  $J$  = 12.7 Hz), 119.75 (d,  $J$  = 6.7 Hz), 115.35 (d,  $J$  = 2.9 Hz), 110.97 (d,  $J$  = 2.7 Hz), 106.36 (d,  $J$  = 16.0 Hz), 53.54, 44.01, 38.43, 23.77;  **$^{19}F$  NMR (DMSO- $d_6$ , 282 MHz)**  $\delta$  -133.13. **HRMS (ESI+)**: calcd. for  $C_{19}H_{17}FNO^+$   $[M+H]^+$  294.1289, found 294.1293. **Optical rotation**:  $[\alpha]_D^{25} +9.5$  ( $c$  0.11,  $CH_2Cl_2$ ) for 94.5:5.5 er ( $R$ ). The er was determined by HPLC analysis using Daicel Chiralcel IB column (hexane/isopropanol = 95/5, 1.0 mL/min, 25 °C, 254 nm,  $t_{major}$  = 12.13 min ( $R$ ),  $t_{minor}$  = 9.37 min ( $S$ )).

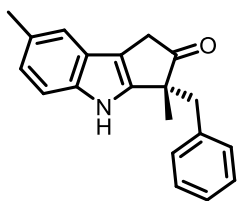

**3ag:** The reaction was carried out on a 0.20 mmol scale. Purified by silica gel column chromatography (PE:EA v/v=15:1) to obtain a white solid (38.2 mg, 66% yield, 94:6 er). **<sup>1</sup>H NMR (DMSO-*d*<sub>6</sub>, 400 MHz):** δ 11.22 (s, 1H), 7.30 (d, *J* = 8.2 Hz, 1H), 7.06 – 6.98 (m, 4H), 6.88 (dd, *J* = 8.3, 1.7 Hz, 1H), 6.79 – 6.71 (m, 2H), 3.22 (d, *J* = 21.2 Hz, 1H), 3.05 (s, 2H), 2.61 (d, *J* = 21.2 Hz, 1H), 2.31 (s, 3H), 1.39 (s, 3H); **<sup>13</sup>C NMR (DMSO-*d*<sub>6</sub>, 101 MHz):** δ 219.24, 144.15, 137.15, 136.81, 129.18, 127.74, 127.41, 126.23, 124.00, 122.28, 118.37, 111.65, 108.91, 52.83, 43.79, 37.94, 23.40, 21.16. **HRMS (ESI+):** calcd. for C<sub>20</sub>H<sub>20</sub>NO<sup>+</sup> [M+H]<sup>+</sup> 290.1539, found 290.1552. **Optical rotation:** [α]<sup>25</sup><sub>D</sub> +16.7 (*c* 0.17, CH<sub>2</sub>Cl<sub>2</sub>) for 94:6 er (*R*). The er was determined by HPLC analysis using Daicel Chiralcel IB column (hexane/isopropanol = 95/5, 1.0 mL/min, 25 °C, 254 nm, *t*<sub>major</sub> = 20.13 min (*R*), *t*<sub>minor</sub> = 10.45 min (*S*)).

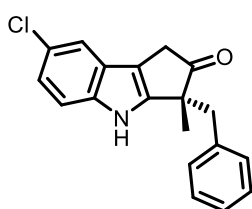

**3ah:** The reaction was carried out on a 0.20 mmol scale. Purified by silica gel column chromatography (PE:EA v/v=15:1) to obtain a white solid (53.9 mg, 87% yield, 94:6 er). **<sup>1</sup>H NMR (DMSO-*d*<sub>6</sub>, 400 MHz):** δ 11.59 (s, 1H), 7.43 (d, *J* = 8.6 Hz, 1H), 7.31 (d, *J* = 2.1 Hz, 1H), 7.09 – 6.98 (m, 4H), 6.79 – 6.72 (m, 2H), 3.25 (d, *J* = 21.3 Hz, 1H), 3.06 (s, 2H), 2.63 (d, *J* = 21.3 Hz, 1H), 1.40 (s, 3H); **<sup>13</sup>C NMR (DMSO-*d*<sub>6</sub>, 101 MHz):** δ 218.62, 146.03, 136.92, 136.89, 129.12, 127.78, 126.32, 124.82, 123.60, 120.63, 117.88, 113.37, 109.39, 52.97, 43.70, 37.86, 23.12. **HRMS (ESI+):** calcd. for C<sub>19</sub>H<sub>17</sub><sup>35</sup>ClNO<sup>+</sup> [M+H]<sup>+</sup> 310.0993, found 310.1001. **Optical rotation:** [α]<sup>25</sup><sub>D</sub> +7.8 (*c* 0.28, CH<sub>2</sub>Cl<sub>2</sub>) for 94:6 er (*R*). The er was determined by HPLC analysis using Daicel Chiralcel IB column (hexane/isopropanol = 92/8, 1.0 mL/min, 25 °C, 254 nm, *t*<sub>major</sub> = 17.37 min (*R*), *t*<sub>minor</sub> = 9.43 min (*S*)).

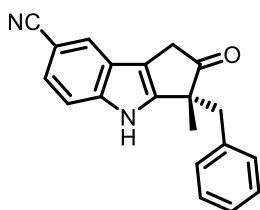

**3ai:** The reaction was carried out on a 0.20 mmol scale. Purified by silica gel column chromatography (PE:EA v/v=5:1) to obtain a white solid (49.2 mg, 81% yield, 92:8 er). **<sup>1</sup>H NMR (DMSO-*d*<sub>6</sub>, 400 MHz):** δ 12.02 (s, 1H), 7.80 (s, 1H), 7.60 (d, *J* = 8.5 Hz, 1H), 7.41 (dd, *J* = 8.4, 1.6 Hz, 1H), 7.06 – 6.99 (m, 3H), 6.80 – 6.73 (m, 2H), 3.31 (d, *J* = 21.4 Hz, 1H), 3.08 (s, 2H), 2.69 (d, *J* = 21.4 Hz, 1H), 1.41 (s, 3H); **<sup>13</sup>C NMR (DMSO-*d*<sub>6</sub>, 101 MHz):** δ 218.63, 147.39, 140.64, 137.26, 129.55, 128.29, 126.85, 124.51, 124.15, 124.00, 121.07, 113.66, 111.09, 101.59, 53.53, 44.08, 38.32, 23.41. **HRMS (ESI+):** calcd. for C<sub>20</sub>H<sub>16</sub>N<sub>2</sub>NaO<sup>+</sup> [M+Na]<sup>+</sup> 323.1155, found 323.1172. **Optical rotation:** [α]<sup>25</sup><sub>D</sub> –7.6 (*c* 0.24, CH<sub>2</sub>Cl<sub>2</sub>) for 92:8 er (*R*). The er was determined by HPLC analysis using

Daicel Chiralcel IB column (hexane/isopropanol = 80/20, 1.0 mL/min, 25 °C, 254 nm,  $t_{\text{major}} = 8.15$  min (*R*),  $t_{\text{minor}} = 6.31$  min (*S*)).

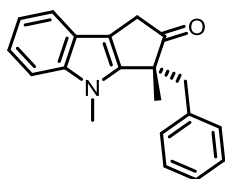

**3aa'**: The reaction was carried out on a 0.20 mmol scale. Purified by silica gel column chromatography (PE:EA v/v=30:1) to obtain a white solid (24.9 mg, 43% yield, 95:5 er). **<sup>1</sup>H NMR (DMSO-*d*<sub>6</sub>, 400 MHz)**:  $\delta$  7.47 (d,  $J = 8.3$  Hz, 1H), 7.29 (d,  $J = 7.8$  Hz, 1H), 7.13 (ddd,  $J = 8.3, 7.1, 1.2$  Hz, 1H), 7.09 – 7.00 (m, 3H), 7.03 – 6.93 (m, 1H), 6.81 – 6.72 (m, 2H), 3.80 (s, 3H), 3.29 (d,  $J = 21.4$  Hz, 1H), 3.20 (d,  $J = 13.5$  Hz, 1H), 3.09 (d,  $J = 13.5$  Hz, 1H), 2.75 (d,  $J = 21.4$  Hz, 1H), 1.49 (s, 3H); **<sup>13</sup>C NMR (DMSO-*d*<sub>6</sub>, 101 MHz)**:  $\delta$  218.66, 144.09, 139.29, 136.98, 129.16, 127.87, 126.38, 123.41, 120.92, 119.18, 118.76, 109.98, 109.66, 53.35, 43.56, 37.67, 30.64, 22.39. **HRMS (ESI+)**: calcd. for C<sub>20</sub>H<sub>20</sub>NO<sup>+</sup> [M+H]<sup>+</sup> 290.1539, found 290.1542. **Optical rotation**:  $[\alpha]^{25}_{\text{D}} +69.2$  ( $c$  0.18, CH<sub>2</sub>Cl<sub>2</sub>) for 95:5 er (*R*). The er was determined by HPLC analysis using Daicel Chiralcel IC column (hexane/isopropanol = 98.5/1.5, 1.0 mL/min, 25 °C, 254 nm,  $t_{\text{major}} = 9.15$  min (*R*),  $t_{\text{minor}} = 8.60$  min (*S*)).

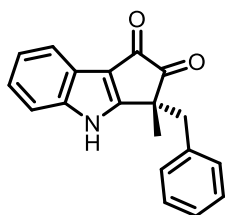

**4**: The reaction was carried out on a 0.10 mmol scale. Purified by silica gel column chromatography (PE:EA v/v=2:1) to obtain a pale yellow solid (26.3 mg, 91% yield, 93.5:6.5 er). **<sup>1</sup>H NMR (DMSO-*d*<sub>6</sub>, 300 MHz)**:  $\delta$  7.65 (t,  $J = 8.7$  Hz, 2H), 7.40 – 7.32 (m, 1H), 7.24 (td,  $J = 7.5, 1.1$  Hz, 1H), 7.09 – 6.96 (m, 3H), 6.81 – 6.72 (m, 2H), 3.24 (d,  $J = 13.4$  Hz, 1H), 3.18 (d,  $J = 13.4$  Hz, 1H), 1.54 (s, 3H); **<sup>13</sup>C NMR (DMSO-*d*<sub>6</sub>, 75 MHz)**:  $\delta$  206.58, 175.47, 168.30, 139.86, 136.06, 129.11, 128.19, 126.81, 125.38, 123.62, 123.30, 120.91, 120.76, 113.61, 47.75, 42.59, 22.49. **HRMS (ESI+)**: calcd. for C<sub>19</sub>H<sub>16</sub>NO<sub>2</sub><sup>+</sup> [M+H]<sup>+</sup> 290.1176, found 290.1180. **Optical rotation**:  $[\alpha]^{25}_{\text{D}} +56.4$  ( $c$  0.16, CHCl<sub>3</sub>) for 93.5:6.5 er (*R*). The er was determined by HPLC analysis using Daicel Chiralcel IE column (hexane/isopropanol = 80/20, 1.0 mL/min, 25 °C, 254 nm,  $t_{\text{major}} = 20.41$  min (*R*),  $t_{\text{minor}} = 22.50$  min (*S*)).

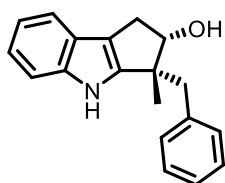

**5**: The reaction was carried out on a 0.10 mmol scale. Purified by silica gel column chromatography (PE:EA v/v=6:1) to obtain a white solid (27.5 mg, 99% yield, >20:1 dr, 95:5 er for both diastereoisomers). **<sup>1</sup>H NMR (DMSO-*d*<sub>6</sub>, 400 MHz)**:  $\delta$  10.54 (s, 1H), 7.30 – 7.23 (m, 2H), 7.14 – 7.10 (m, 3H), 6.98 – 6.86 (m, 4H), 5.46 (d,  $J = 5.5$  Hz, 1H), 4.37 – 4.26 (m, 1H), 2.92 (dd,  $J =$

13.5, 7.1 Hz, 1H), 2.90 (d,  $J = 13.1$  Hz, 1H), 2.81 (d,  $J = 13.0$  Hz, 1H), 2.43 (dd,  $J = 13.5, 7.7$  Hz, 1H), 1.28 (s, 3H);  $^{13}\text{C}$  NMR (DMSO- $d_6$ , 101 MHz):  $\delta$  147.78, 139.61, 130.84, 127.83, 126.03, 124.77, 119.83, 118.81, 118.40, 112.22, 111.09, 84.92, 47.65, 41.03, 32.57, 23.53. HRMS (ESI+): calcd. for  $\text{C}_{19}\text{H}_{20}\text{NO}^+$   $[\text{M}+\text{H}]^+$  278.1539, found 278.1545. Optical rotation:  $[\alpha]^{25}_{\text{D}} -102.2$  ( $c$  0.18,  $\text{CH}_2\text{Cl}_2$ ) for 95:5 er ( $R,S$ ). The er was determined by HPLC analysis using Daicel Chiralcel IF column (hexane/isopropanol = 93/7, 1.0 mL/min, 25 °C, 254 nm,  $t_{\text{major}1} = 8.60$  min ( $R,S$ ),  $t_{\text{minor}1} = 11.11$  min ( $S,R$ ),  $t_{\text{major}2} = 11.89$  min ( $R,R$ ),  $t_{\text{minor}2} = 10.42$  min ( $S,S$ )).

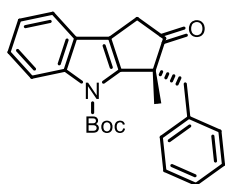

**6:** The reaction was carried out on a 0.10 mmol scale. Purified by silica gel column chromatography (PE:EA v/v=50:1) to obtain a white solid (31.9 mg, 85% yield, 96:4 er).  $^1\text{H}$  NMR ( $\text{CHCl}_3$ - $d$ , 400 MHz):  $\delta$  8.14 (d,  $J = 8.4$  Hz, 1H), 7.32 – 7.25 (m, 2H), 7.22 – 7.17 (m, 1H), 7.03 – 6.98 (m, 3H), 6.87 – 6.80 (m, 2H), 3.70 (d,  $J = 13.1$  Hz, 1H), 3.20 (d,  $J = 21.8$  Hz, 1H), 3.14 (d,  $J = 13.1$  Hz, 1H), 2.66 (d,  $J = 21.8$  Hz, 1H), 1.81 (s, 9H), 1.62 (s, 3H);  $^{13}\text{C}$  NMR (DMSO- $d_6$ , 75 MHz):  $\delta$  218.32, 149.42, 142.85, 137.68, 137.31, 128.62, 128.04, 126.34, 125.58, 124.34, 123.01, 119.47, 118.76, 115.91, 84.93, 56.71, 42.46, 36.90, 27.84, 22.74. HRMS (ESI+): calcd. for  $\text{C}_{24}\text{H}_{26}\text{NO}_3^+$   $[\text{M}+\text{H}]^+$  376.1907, found 376.1908. Optical rotation:  $[\alpha]^{25}_{\text{D}} +130.2$  ( $c$  0.17,  $\text{CH}_2\text{Cl}_2$ ) for 96:4 er ( $R$ ). The er was determined by HPLC analysis using Daicel Chiralcel IC column (hexane/isopropanol = 99/1, 1.0 mL/min, 25 °C, 254 nm,  $t_{\text{major}} = 6.82$  min ( $R$ ),  $t_{\text{minor}} = 6.18$  min ( $S$ )).

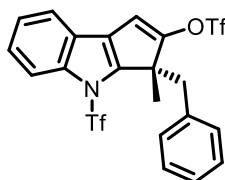

**7:** The reaction was carried out on a 0.10 mmol scale. Purified by silica gel column chromatography (PE:DCM v/v=10:1) to obtain a colorless oil (38.3 mg, 71% yield).  $^1\text{H}$  NMR (DMSO- $d_6$ , 400 MHz):  $\delta$  7.90 (d,  $J = 8.3$  Hz, 1H), 7.75 (d,  $J = 7.6$  Hz, 1H), 7.44 (dt,  $J = 22.4, 7.5$  Hz, 2H), 7.07 – 6.97 (m, 3H), 6.94 (s, 1H), 6.83 (d,  $J = 6.4$  Hz, 2H), 3.48 (d,  $J = 13.7$  Hz, 1H), 3.18 (d,  $J = 13.7$  Hz, 1H), 1.61 (s, 3H);  $^{13}\text{C}$  NMR (DMSO- $d_6$ , 101 MHz):  $\delta$  154.53, 140.73, 138.47, 134.72, 128.14, 127.84, 127.49, 126.93, 126.30, 125.96, 124.19, 120.89, 119.31 (q,  $J = 327.6$  Hz), 118.01 (q,  $J = 322.0$  Hz), 114.26, 109.37, 54.46, 40.43, 17.98;  $^{19}\text{F}$  NMR (DMSO- $d_6$ , 282 MHz)  $\delta$  -72.92, -73.20. HRMS (ESI+): calcd. for  $\text{C}_{21}\text{H}_{16}\text{F}_6\text{NO}_5\text{S}_2^+$   $[\text{M}+\text{H}]^+$  540.0369, found 540.0370.



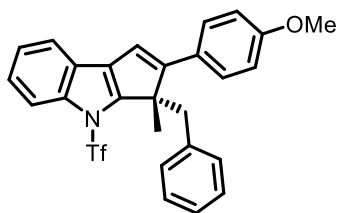

**8:** The reaction was carried out on a 0.10 mmol scale. Purified by silica gel column chromatography (PE:DCM v/v=8:1) to obtain a white solid (42.8 mg, 86% yield, 95:5 er). **<sup>1</sup>H NMR (DMSO-*d*<sub>6</sub>, 400 MHz):**  $\delta$  7.91 (d,  $J$  = 8.1 Hz, 1H), 7.77 (d,  $J$  = 8.4 Hz, 2H), 7.64 (d,  $J$  = 7.3 Hz, 1H), 7.40 (p,  $J$  = 7.1 Hz, 2H), 7.10 (s, 1H), 7.05 (d,  $J$  = 8.3 Hz, 2H), 6.91 – 6.81 (m, 3H), 6.70 – 6.61 (m, 2H), 3.82 (s, 3H), 3.63 (q,  $J$  = 13.8 Hz, 2H), 1.70 (s, 3H); **<sup>13</sup>C NMR (DMSO-*d*<sub>6</sub>, 101 MHz):**  $\delta$  158.75, 152.04, 148.31, 139.79, 136.20, 132.43, 128.09, 128.05, 127.49, 127.36, 126.28, 125.76, 125.62, 124.06, 120.54, 119.50 (q,  $J$  = 328.5 Hz), 117.71, 114.61, 114.23, 56.35, 55.14, 41.89, 20.40; **<sup>19</sup>F NMR (DMSO-*d*<sub>6</sub>, 282 MHz)**  $\delta$  -72.64. **HRMS (ESI+):** calcd. for C<sub>27</sub>H<sub>23</sub>F<sub>3</sub>NO<sub>3</sub>S<sup>+</sup> [M+H]<sup>+</sup> 498.1345, found 498.1343. **Optical rotation:**  $[\alpha]_D^{25}$  -14.6 ( $c$  0.28, CH<sub>2</sub>Cl<sub>2</sub>) for 95:5 er (*R*). The er was determined by HPLC analysis using Daicel Chiralcel IF column (hexane/isopropanol = 97/3, 1.0 mL/min, 25 °C, 254 nm,  $t_{\text{major}}$  = 5.25 min (*R*),  $t_{\text{minor}}$  = 4.74 min (*S*)).

## 5. QSSR Model

The conformational search was implemented for structures of ligands, using ABCluster and xTB.<sup>4,7</sup> The minimized structures of ligands were geometrically optimized in the gas phase by the DFT method with the B3LYP functional in combination with the RI approximation and the def2-TZVP(-f) basis set for all atoms, applying the Grimme's D4 empirical correction as implemented in the ORCA 5.0.2 program package.<sup>4,5</sup> IR frequencies were obtained from the geometry optimized structures at the same level of theory as that used for geometry optimizations. Percent buried volumes of the substituents were calculated for the geometrically optimized structures using the python script DBSTEP developed by the Paton Group.<sup>6c</sup> Measured  $\Delta\Delta G^\ddagger$  values were calculated using the formula  $\Delta\Delta G^\ddagger = -RT\ln(er)$ , where  $R$  is the ideal gas constant,  $T$  is temperature, and  $er$  is the enantiomeric ratio measured by HPLC. Molecular structures were visualized by using VMD 1.9.3.<sup>8a</sup>

Some representative molecular descriptors are listed in the table S2.  $V_{\text{bur}}$  (4 Å) [*resp.*  $V_{\text{bur}}$  (5 Å),  $V_{\text{bur}}$  (6 Å)] is the percent buried volume with a radius of 4 Å [*resp.* 5 Å, 6 Å] centered on the hydrogen atom of the amide in ligand.  $\nu$  (C=O) is the stretching vibration frequency of the C=O.  $\nu$  (N-H) is the stretching vibration frequency of the N-H.  $\delta$  (N-H) is the bending vibration frequency of the N-H. The illustration diagram of  $V_{\text{bur}}$  (5 Å),  $\nu$  (C=O) and  $\delta$  (N-H) is given in figure S1.

**Figure S1: The illustration diagram of  $V_{\text{bur}}$  (5 Å),  $\nu$  (C=O) and  $\delta$  (N-H)**

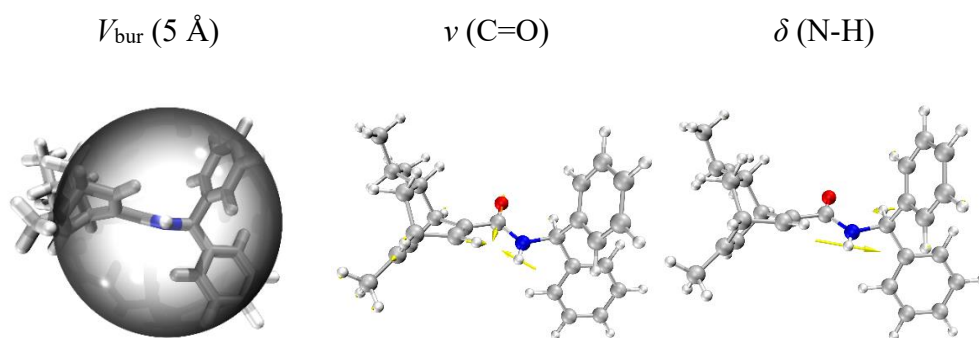

**Table S2: Representative molecular descriptors of ligands**

| R           | $\Delta\Delta G^\ddagger$ | $V_{\text{bur}}$ (4 Å) | $V_{\text{bur}}$ (5 Å) | $V_{\text{bur}}$ (6 Å) | $\nu$ (C=O) | $\nu$ (N-H) | $\delta$ (N-H) |
|-------------|---------------------------|------------------------|------------------------|------------------------|-------------|-------------|----------------|
| Me          | 1.4180                    | 29.75                  | 21.16                  | 16.29                  | 1722.44     | 3637.00     | 1545.43        |
| Et          | 1.5725                    | 33.42                  | 24.15                  | 18.02                  | 1721.60     | 3641.32     | 1539.33        |
| <i>i</i> Pr | 1.7117                    | 38.47                  | 27.00                  | 19.66                  | 1721.13     | 3625.46     | 1531.69        |
| <i>n</i> Bu | 1.6162                    | 36.71                  | 27.58                  | 21.15                  | 1721.80     | 3647.86     | 1537.37        |
| <i>t</i> Bu | 1.7117                    | 41.71                  | 30.14                  | 21.52                  | 1720.99     | 3624.61     | 1535.91        |

|                               |        |       |       |       |         |         |         |
|-------------------------------|--------|-------|-------|-------|---------|---------|---------|
| CHEt <sub>2</sub>             | 1.7643 | 45.77 | 32.96 | 23.16 | 1721.03 | 3626.96 | 1531.42 |
| Cy                            | 1.7117 | 39.47 | 30.31 | 23.53 | 1720.99 | 3614.63 | 1529.41 |
| Cy12                          | 1.8208 | 42.28 | 33.76 | 27.54 | 1720.70 | 3615.27 | 1539.88 |
| CH <sub>2</sub> Ph            | 1.7117 | 37.43 | 29.36 | 23.03 | 1721.26 | 3626.91 | 1540.05 |
| CHPh <sub>2</sub>             | 1.9485 | 46.89 | 38.00 | 29.88 | 1721.38 | 3611.54 | 1523.21 |
| CPh <sub>3</sub>              | 2.0217 | 52.99 | 44.21 | 35.26 | 1723.17 | 3628.17 | 1515.66 |
| Ph                            | 1.6162 | 36.58 | 28.68 | 22.15 | 1723.85 | 3615.01 | 1558.05 |
| Ph(Me) <sub>2</sub>           | 1.7643 | 43.30 | 33.61 | 25.38 | 1724.48 | 3605.74 | 1532.72 |
| Ph( <i>i</i> Pr) <sub>2</sub> | 1.9485 | 50.44 | 40.90 | 31.64 | 1724.42 | 3608.52 | 1521.92 |
| Fr                            | 1.8819 | 43.82 | 35.88 | 28.70 | 1721.08 | 3623.99 | 1522.71 |

Note: Cy = cyclohexyl, Cy12 = cyclododecyl, Ph(Me)<sub>2</sub> = 2,6-Me<sub>2</sub>C<sub>6</sub>H<sub>3</sub>, Ph(*i*Pr)<sub>2</sub> = 2,6-*i*Pr<sub>2</sub>C<sub>6</sub>H<sub>3</sub>, Fr = 9-fluorenyl.

**Figure S2: Visualizations of the linear regression models (with labels)**

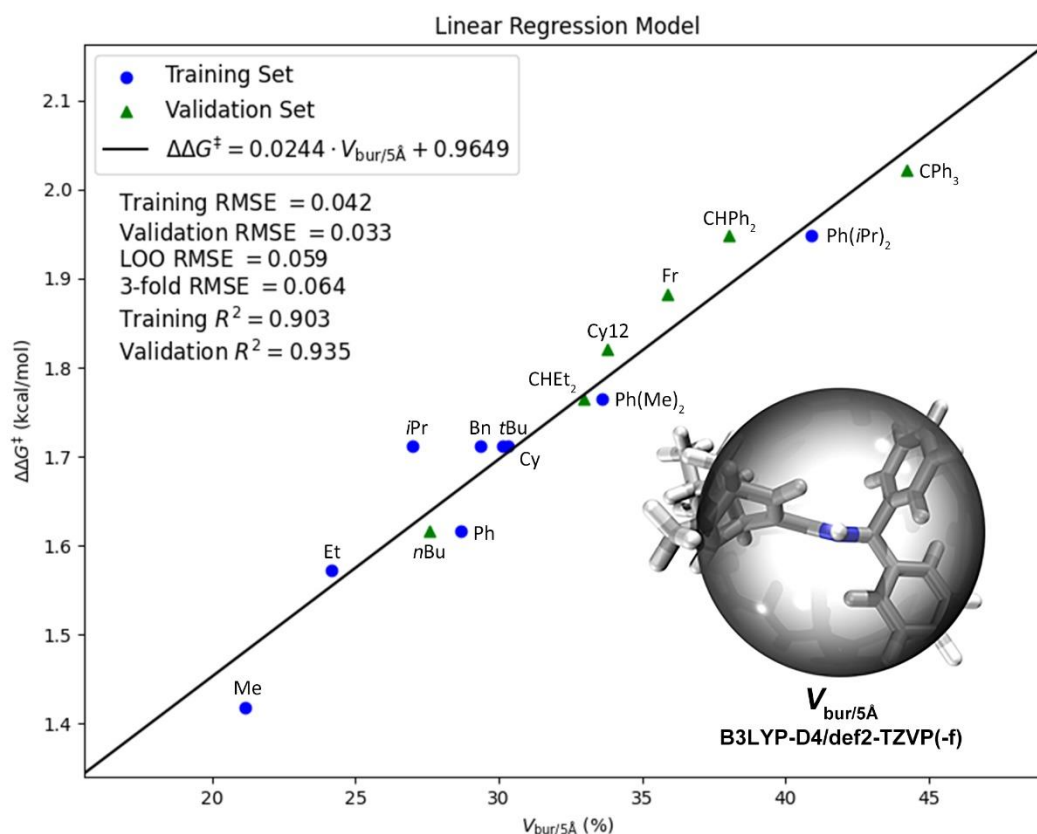

Linear regression models were developed and evaluated using Python package Scikit-learn. Root mean square error (RMSE) and R-square ( $R^2$ ) were employed for model performance evaluation. Leave-one-out (LOO) cross-validation and 3-fold cross-validation were implemented to avoid overfitting. The 3-fold RMSE was obtained from the mean of 10 independent 3-fold cross-validations. Let  $m$  be the amount of

---

data ( $m = 9$  for training set, and  $m = 6$  for validation set) and  $N = 10$  be the number of independent cross-validations, then  $\text{RMSE} = \sqrt{\frac{1}{m} \sum_{i=1}^m (y_i - \hat{y}_i)^2}$ , 3-fold RMSE =  $\sqrt{\frac{1}{3N \sum_i 1} \sum_{k=1}^N \sum_i (y_{ki} - \hat{y}_{ki})^2}$ , LOO RMSE =  $\sqrt{\frac{1}{m} \sum_i (y_i - \hat{y}_i)^2}$ ,  $R^2 = 1 - \frac{\sum_{i=1}^m (y_i - \hat{y}_i)^2}{\sum_{i=1}^m (y_i - \bar{y})^2}$ .

The visualizations of linear regression models were performed by Python package Matplotlib 3.5.2.<sup>8c</sup> A labeled visualizations of the linear regression model was given in figure S2.

---

## 6. DFT Calculation

Geometries of transition states and intermediates were optimized by the DFT method with the PBE0 functional in combination with the RI approximation, the def2-TZVP basis set for rhodium atom and the def2-SVP basis set for other atoms, and the implicit solvent model C-PCM using ethanol as the solvent, applying the Grimme's D4 empirical correction as implemented in the ORCA 5.0.2 program package.<sup>4,5</sup> Frequency analyses were performed at the same level of theory as that used for geometry optimizations to characterize the stationary points as either minima (no imaginary frequencies) or saddle points (one imaginary frequency) on the potential energy surface. Intrinsic reaction coordinate (IRC) calculations were performed to confirm that the transition state connects with its respective reactant and product. All geometrically optimized structures have been checked for the wavefunction stability. Grimme's quasi-harmonic approximation implemented in the ORCA 5.0.2 program package was applied to the vibrational entropies to obtain thermal corrections for Gibbs free energies.<sup>6a</sup> The ZPE scale factor 0.98008286 was derived from linear regression to the experimental values available in the ZPVE15/10 Database.<sup>6b</sup> Single point energies were calculated with the PWPB95 functional in combination with the RI approximation and the def2-TZVPP basis set for all atoms, applying the Grimme's D4 empirical correction as implemented in the ORCA 5.0.2 program package.<sup>5</sup> The solvation energies were evaluated with the SMD(ethanol)/M06-2X/Lan12TZ(Rh)/6-31G\*(other atoms).<sup>5</sup> Free energies calculated using the gas phase standard state concentration (1 atm) were converted to reproduce the standard state concentration in solution (1 M) at 30 °C by adding 1.936116029 kcal/mol. Grimme's FOD plot suggests that the multi-reference effects of these systems are not significant.<sup>6c</sup> The non-covalent interaction (NCI) analysis within the  $\text{sign}(\lambda_2)\rho$  colored reduced density gradient (RDG) plot and the topology analysis of the electron density within the framework of Bader's quantum theory of atoms in molecules (QTAIM) were performed with Multiwfn 3.8(dev).<sup>6d</sup> Molecular structures were visualized by using CYLView20, VMD 1.9.3, and Paraview 5.10.1.<sup>8a,8b</sup> The visualizations of IRC path was performed by Python package Matplotlib 3.5.2.<sup>8c</sup> The visualizations of energy barriers was performed by EnePro v1.6 script.<sup>8d</sup>

Different transition states of olefin insertion with ligand L8 (R = *t*Bu) were carefully examined, which was thought to be critical for the enantioselectivity of rhodium catalyzed conjugate addition.<sup>9</sup> Conformational search was also implemented for typical transition states. The relative Gibbs energy of transition states (TS) of olefin

insertion, enone binding (EB) intermediates, carborhodation (CR) intermediates are listed in table S3 and table S4. The illustration diagram of IRC and FOD plot (isovalue = 0.005) are shown in figure S3. Representative structures are shown in figure S4.

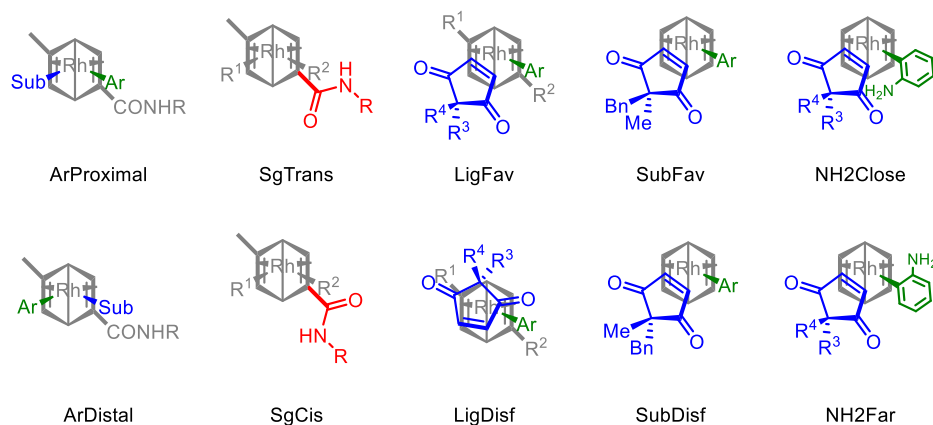

**Figure S3: The illustration diagram of IRC and FOD plot (for TS15)**

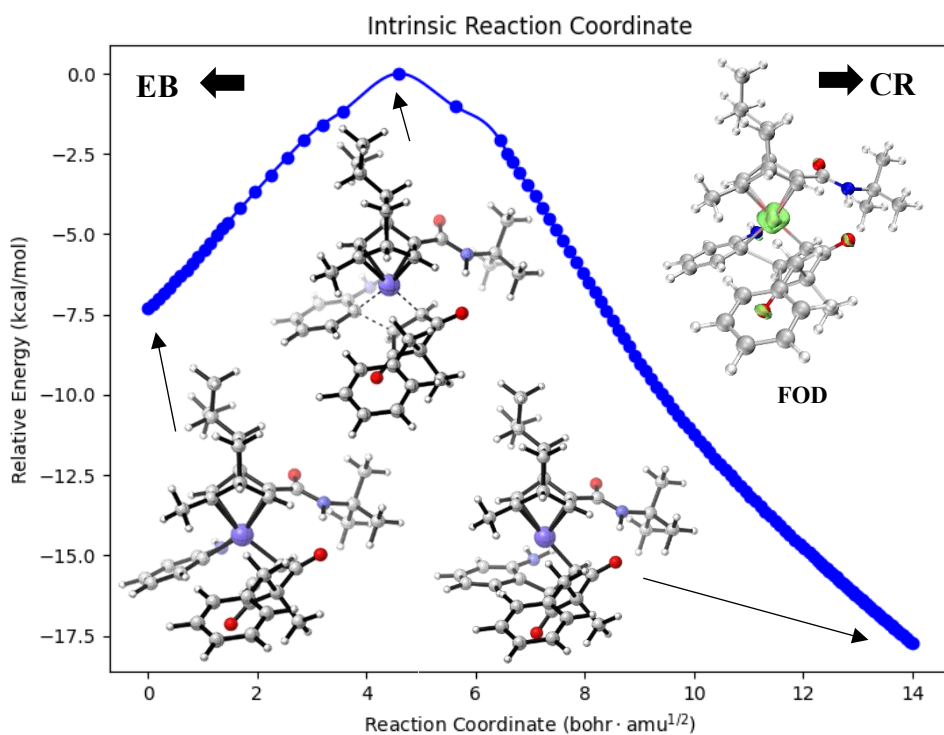

The relation between absolute configuration of transition state and that of product is illustrated (in Hayashi's style) in scheme S1. The absolute configuration of the product follows the Curtin-Hammett principle and the EB intermediates are in equilibrium. The relative energy difference between favored transition state and disfavored transition state determines the enantiomeric excess value, viz.  $er_{\text{calc}} = \exp(-\Delta\Delta G_{\text{TS}}/RT) = \exp(-\Delta(G_{\text{fav}} - G_{\text{disf}})/RT)$ . If the EB intermediates  $R_i$  obey

the Boltzmann distribution, then relative energies of an ensemble of transition states need to be taken into consideration,<sup>10</sup> viz.

$$er_{\text{calcB}} = \frac{k_{\text{fav}}}{k_{\text{disf}}} = \frac{\sum_i^{\text{fav}} k_i[\text{R}_i]}{\sum_j^{\text{disf}} k_j[\text{R}_j]} = \frac{\sum_i^{\text{fav}} k_i p_{\text{EB},i}[\text{R}]}{\sum_j^{\text{disf}} k_j p_{\text{EB},j}[\text{R}]} = \frac{\sum_i^{\text{fav}} \frac{k k_{\text{B}} T}{h} e^{-\beta \Delta G_i^\ddagger} \frac{1}{Z} e^{-\beta(G_{\text{EB},i} - G_{\text{ref}})}}{\sum_j^{\text{disf}} \frac{k k_{\text{B}} T}{h} e^{-\beta \Delta G_j^\ddagger} \frac{1}{Z} e^{-\beta(G_{\text{EB},j} - G_{\text{ref}})}} =$$

$\frac{\sum_i^{\text{fav}} e^{-\beta(G_{\text{TS},i} - G_{\text{ref}})}}{\sum_j^{\text{disf}} e^{-\beta(G_{\text{TS},j} - G_{\text{ref}})}}$ , where  $\beta = 1/RT$ . For our system,  $ee_{\text{calc}} = 0.870$  (considering

TS15 and TS16) and  $ee_{\text{calcB}} = 0.879$  (considering from TS1 to TS16), which means multiple transition states of the similar free energies leading to the same enantiomer require no special consideration.

### Scheme S1: The relation between configuration of TS and that of product

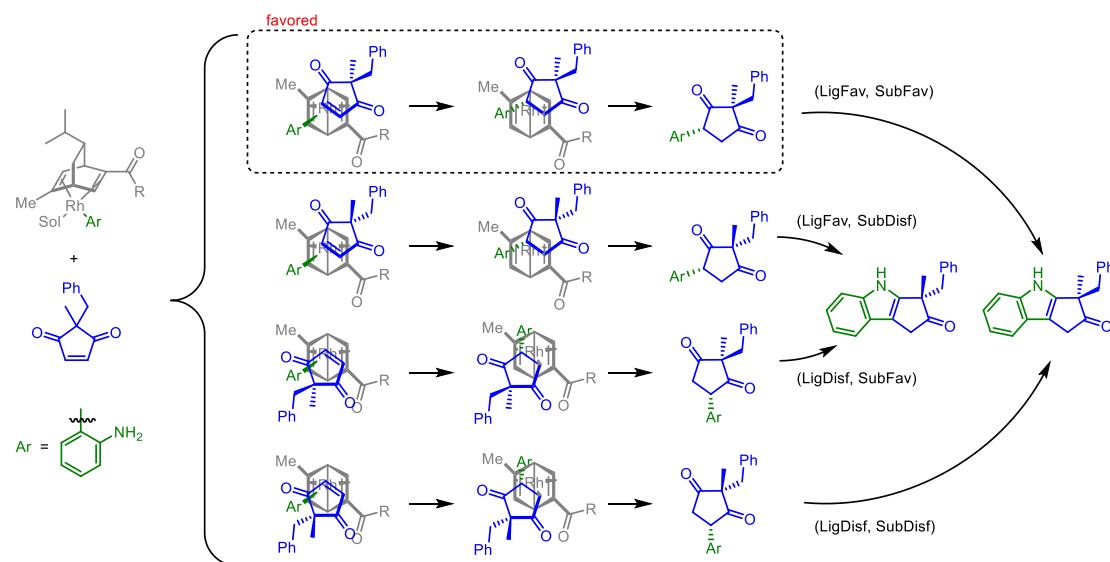

**Table S3: Relative Gibbs energy of TS, EB and CR (unit: kcal/mol)**

| #  | Name                                      | $\Delta G_{EB,gas}$ | $\Delta G_{EB}$ | $\Delta G_{TS,gas}$ | $\Delta G_{TS}$ | $\Delta G_{CR,gas}$ | $\Delta G_{CR}$ |
|----|-------------------------------------------|---------------------|-----------------|---------------------|-----------------|---------------------|-----------------|
| 1  | ArDistal-SgCis-NH2Close-LigDisf-SubDisf   | 0.591611374         | -2.47162134     | 11.89607965         | 13.05141833     | -2.569008773        | -3.557867549    |
| 2  | ArDistal-SgCis-NH2Close-LigDisf-SubFav    | -2.511636353        | -4.562006069    | 8.645851547         | 10.60575983     | -5.465332452        | -4.822170725    |
| 3  | ArDistal-SgCis-NH2Close-LigFav-SubDisf    | -1.751911579        | -0.145801506    | 7.535453727         | 10.4023154      | -12.59513646        | -12.77850397    |
| 4  | ArDistal-SgCis-NH2Close-LigFav-SubFav     | -4.881194638        | -2.969036316    | 4.251000161         | 6.848349814     | -15.18885187        | -13.58694696    |
| 5  | ArDistal-SgCis-NH2Far-LigDisf-SubDisf     | -2.763031483        | -4.528935568    | 11.67889029         | 9.295310592     | -6.958252224        | -11.80026232    |
| 6  | ArDistal-SgCis-NH2Far-LigDisf-SubFav      | -4.23864491         | -6.263200355    | 9.319275151         | 7.847111031     | -10.72378489        | -13.58502231    |
| 7  | ArDistal-SgCis-NH2Far-LigFav-SubDisf      | -6.191350254        | -7.210826354    | 9.026051364         | 7.665419692     | -12.53020959        | -16.74504101    |
| 8  | ArDistal-SgCis-NH2Far-LigFav-SubFav       | -9.286146389        | -9.673665435    | 5.856644343         | 6.622903774     | -17.37469013        | -17.21873423    |
| 9  | ArDistal-SgTrans-NH2Close-LigDisf-SubDisf | -2.2337375          | 4.927215403     | 5.20188968          | 13.19343695     | -8.171553078        | -1.078929049    |
| 10 | ArDistal-SgTrans-NH2Close-LigDisf-SubFav  | -4.76965164         | 2.15856578      | 1.393530245         | 9.552660931     | -11.56584981        | -3.533877463    |
| 11 | ArDistal-SgTrans-NH2Close-LigFav-SubDisf  | -9.147731162        | -1.39506576     | -0.324701146        | 8.643447471     | -22.05984599        | -14.91440323    |
| 12 | ArDistal-SgTrans-NH2Close-LigFav-SubFav   | -12.62648398        | -4.237865998    | -3.509129755        | 5.49608906      | -24.58500607        | -16.01662127    |
| 13 | ArDistal-SgTrans-NH2Far-LigDisf-SubDisf   | -2.878531919        | -3.934165711    | 6.593798081         | 9.906884262     | -13.13957334        | -11.7709077     |
| 14 | ArDistal-SgTrans-NH2Far-LigDisf-SubFav    | -3.146644675        | -5.155118213    | 5.735003197         | 9.905426368     | -15.34689739        | -14.99327043    |
| 15 | ArDistal-SgTrans-NH2Far-LigFav-SubDisf    | -12.57724606        | -8.248236681    | 0.161438532         | 6.141470694     | -22.40871019        | -17.93466718    |
| 16 | ArDistal-SgTrans-NH2Far-LigFav-SubFav     | -15.48270608        | -9.947455038    | -2.688221522        | 4.535110052     | -26.05549248        | -19.68008554    |



**Table S4: Relative Gibbs energy of TS (unit: kcal/mol)**

| #    | Name                                       | $\Delta G_{\text{TS,gas}}$ | $\Delta G_{\text{TS}}$ |
|------|--------------------------------------------|----------------------------|------------------------|
| 15   | ArDistal-SgTrans-NH2Far-LigFav-SubDisf     | 0.161438532                | 6.141470694            |
| 15'  | ArDistal-SgTrans-NH2Far-LigFav-SubDisf     | 0.769676107                | 6.505990982            |
| 15'' | ArDistal-SgTrans-NH2Far-LigFav-SubDisf''   | -0.305981119               | 7.517906019            |
| 16   | ArDistal-SgTrans-NH2Far-LigFav-SubFav      | -2.688221522               | 4.535110052            |
| 16'  | ArDistal-SgTrans-NH2Far-LigFav-SubFav'     | 0.671101238                | 6.684068448            |
| 16'' | ArDistal-SgTrans-NH2Far-LigFav-SubFav''    | 1.003292709                | 6.989813225            |
| 17   | ArProximal-SgTrans-NH2Close-LigFav-SubDisf | 5.222604322                | 10.79320121            |
| 18   | ArProximal-SgTrans-NH2Close-LigFav-SubFav  | 2.353217641                | 8.005701598            |
| 19   | ArProximal-SgTrans-NH2Far-LigDisf-SubDisf  | 7.526295601                | 10.65124364            |
| 20   | ArProximal-SgTrans-NH2Far-LigDisf-SubFav   | 5.296277505                | 9.497193382            |
| 21   | ArProximal-SgTrans-NH2Far-LigFav-SubDisf   | 5.16603455                 | 7.211572459            |
| 22   | ArProximal-SgTrans-NH2Far-LigFav-SubFav    | 3.659484037                | 7.177479816            |

**Figure S4: Representative structures of transition states**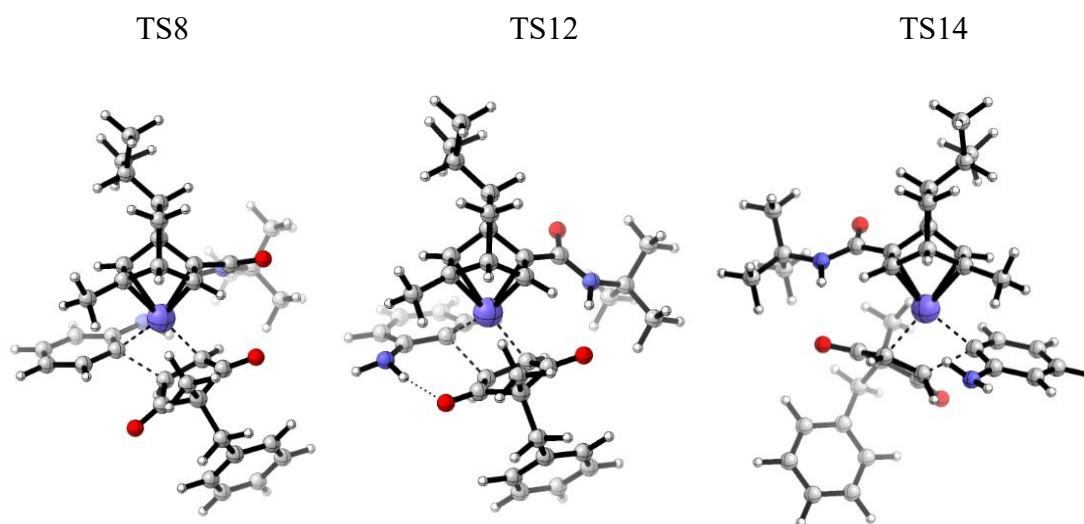

TS15

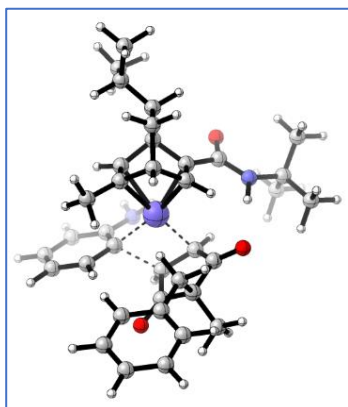

TS15'

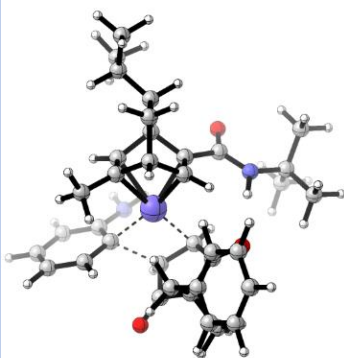

TS15''

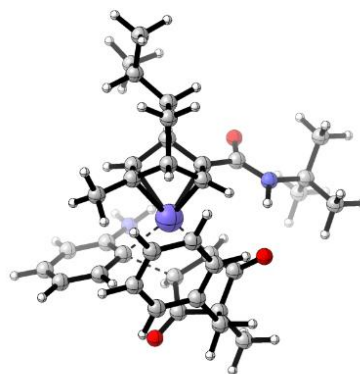

TS16

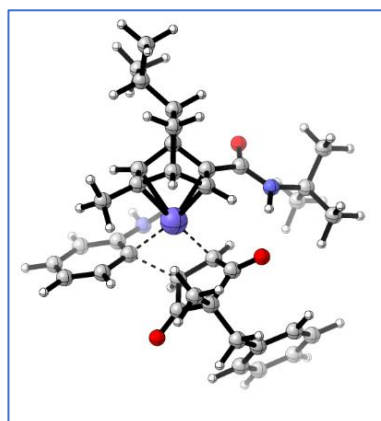

TS16'

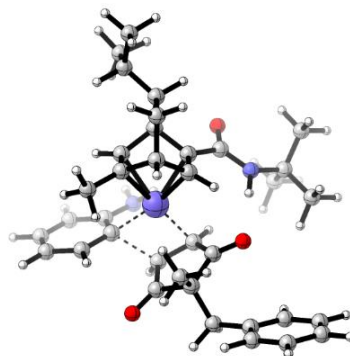

TS16''

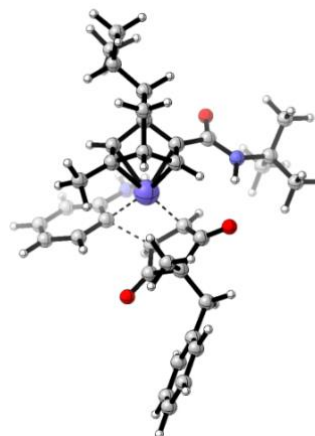

TS20

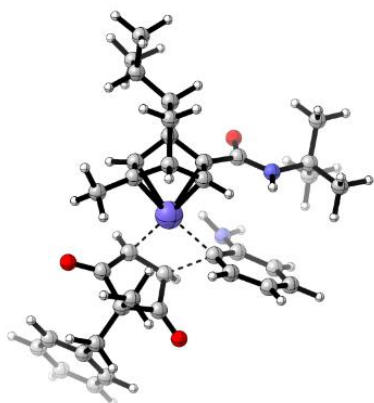

TS21

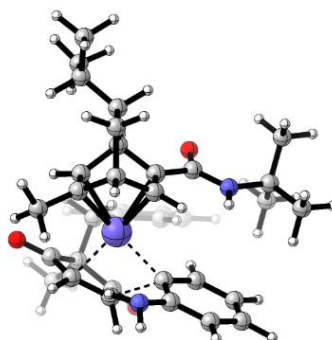

TS22

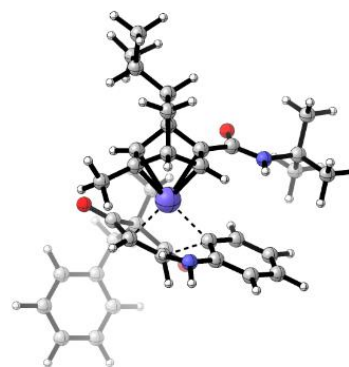

Scheme S2: Comparison of relative Gibbs energy between LigFav and LigDisf

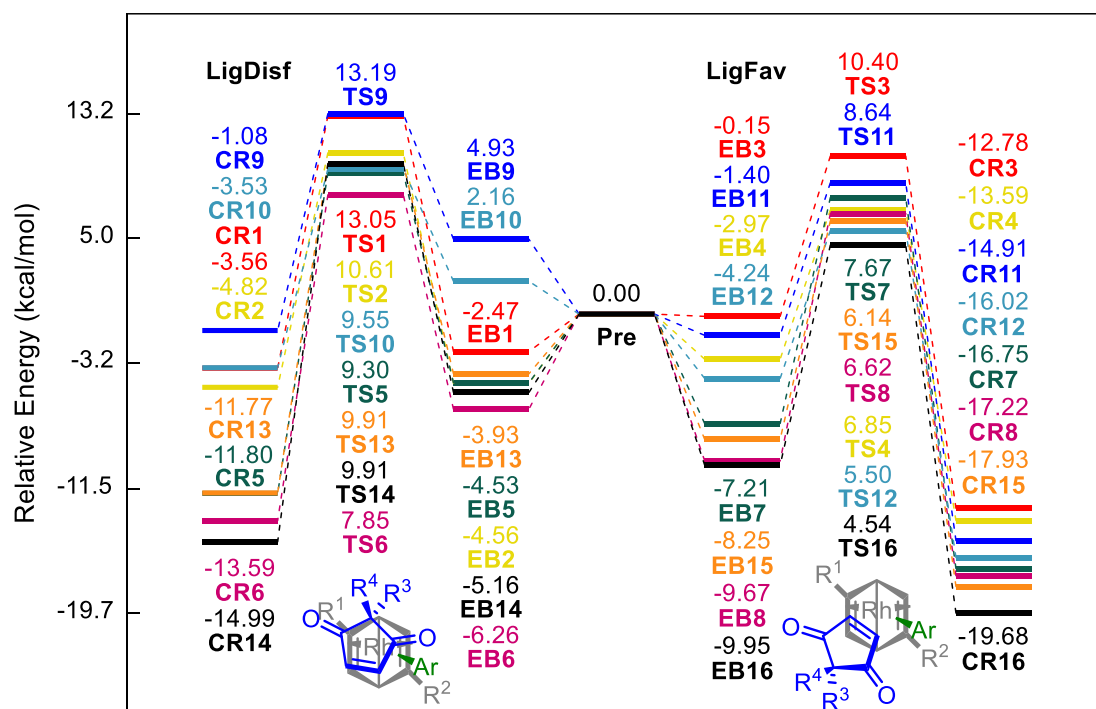

Scheme S3: Comparison of relative Gibbs energy between SgTrans and SgCis

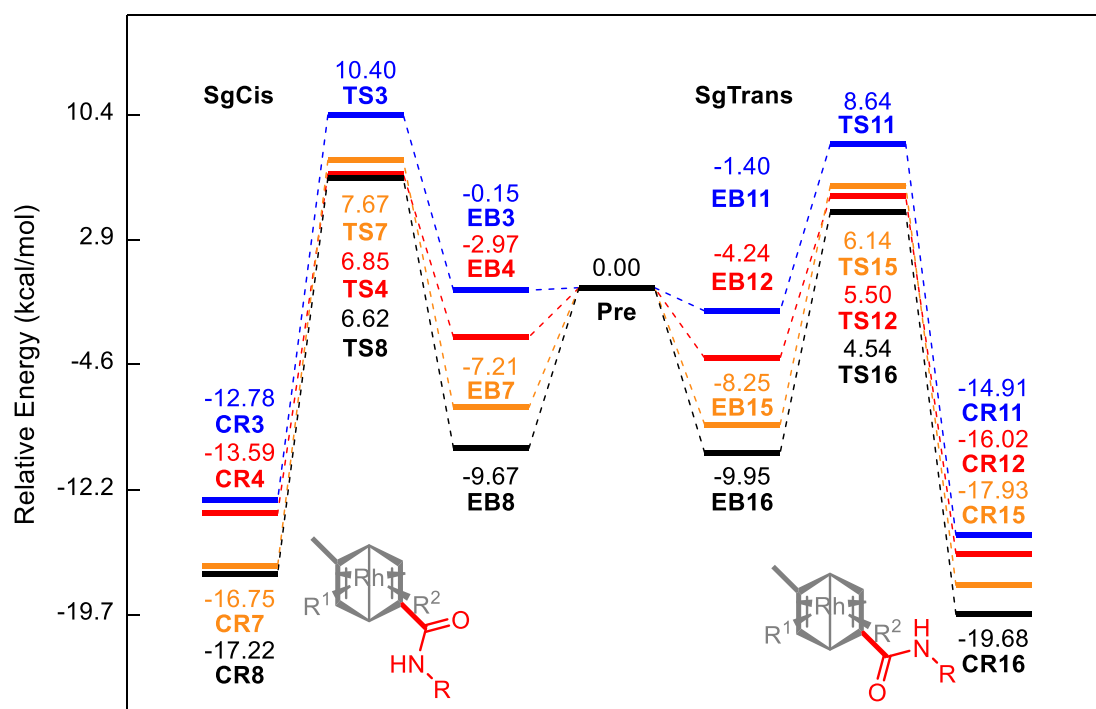

Scheme S2 and scheme S3 provides an intuitive relative energy comparison. The same color on both sides of the **Pre** indicates similar transition states and intermediates

except for one term, viz. LigFav vs. LigDisf [*resp.* SgTrans vs. SgCis]. The scheme S2 indicates the classic Hayashi's stereochemical model is still valid in our system. The relative energies of LigFav transition states are on average 2–4 kcal/mol lower than that of LigDisf. The scheme S3 reveals that the relative energies of SgTrans transition states are on average 1–2 kcal/mol lower than that of SgCis, which suggests hydrogen bonds between the N-H of the amide-diene ligand and the carbonyl group of the substrate in those SgTrans transition states stabilize the relative energy. The relative energies between NH2Close transition states and NH2Far transition states are closely related to the solvation effect, and those potential hydrogen bonds between N-H of aniline and the carbonyl group of the substrate are not important.

Since the enantioselectivity control has been verified to be determined by the transition states ArDistal-SgTrans-NH2Far-LigFav-SubFav and ArDistal-SgTrans-NH2Far-LigFav-SubDisf, we investigated these two transition states for different ligands. For brevity, TS(ArDistal-SgTrans-NH2Far-LigFav-SubFav) is abbreviated as TSFav, and TS(ArDistal-SgTrans-NH2Far-LigFav-SubDisf) is abbreviated as TSDisf. The Gibbs energies and relative Gibbs energies of TSFav and TSDisf for different ligands were given in table S5 and table S6 respectively.

**Table S5: Gibbs energy of TS for different ligands (unit: a.u.)**

| #  | Name                                    | $G_{\text{TS,gas}}$ | $G_{\text{TS}}$ |
|----|-----------------------------------------|---------------------|-----------------|
| 23 | TSDisf for Ligand (R=Me)                | -1725.591099        | -1725.631241    |
| 24 | TSFav for Ligand (R=Me)                 | -1725.594526        | -1725.633013    |
| 15 | TSDisf for Ligand (R= <i>t</i> Bu)      | -1843.406825        | -1843.446989    |
| 16 | TSFav for Ligand (R= <i>t</i> Bu)       | -1843.411403        | -1843.449586    |
| 25 | TSDisf for Ligand (R=CPh <sub>3</sub> ) | -2418.259965        | -2418.315173    |
| 26 | TSFav for Ligand (R=CPh <sub>3</sub> )  | -2418.264596        | -2418.318262    |

**Table S6:  $\Delta\Delta G_{\text{TS,gas}}$  and  $\Delta\Delta G_{\text{TS}}$  for different ligands (unit: kcal/mol)**

| Name                         | $\Delta\Delta G_{\text{TS,gas}}$ | $\Delta\Delta G_{\text{TS}}$ | ee <sub>calc</sub> | ee <sub>exp</sub> |
|------------------------------|----------------------------------|------------------------------|--------------------|-------------------|
| Ligand (R=Me)                | 2.150488997                      | 1.111910679                  | 69%                | 79%               |
| Ligand (R= <i>t</i> Bu)      | 2.872375896                      | 1.629076485                  | 84%                | 86%               |
| Ligand (R=CPh <sub>3</sub> ) | 2.906132236                      | 1.938695477                  | 90%                | 91%               |

The RDG plots of TS for different ligands are given in figure S5, visualizing the non-covalent interactions in the transition states.<sup>6f</sup> Only non-covalent interactions between ligand-Rh-PhNH<sub>2</sub> complex and substrate are displayed (isovalue = 0.5). Except for the non-covalent interactions framed by the orange boxes (in TS16 and TS26), other major non-covalent interactions exist in both TSFav and TSDif. In other words, these framed non-covalent interactions are thought to have important effects on enantioselectivity. The topology analysis of the electron density was also used to give the properties of the bond critical points (BCPs), which were summarized in table S7.<sup>6g</sup> The illustration of bond critical points in TS16 and TS26 was given in figure S6.

**Figure S5: RDG plots of TS for different ligands**

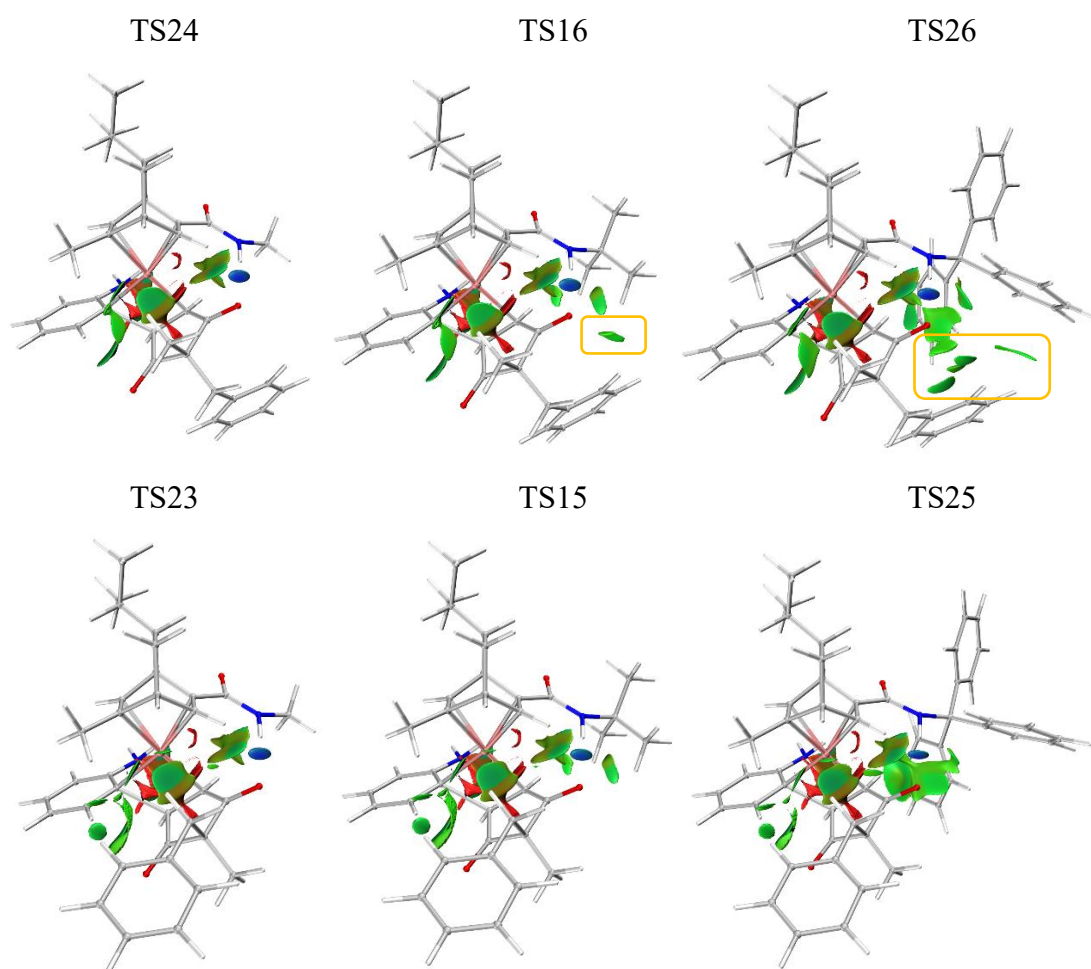

**Table S7: Selected properties of the bond critical points**

| BCP | $\rho(\mathbf{r})$ | $\nabla^2\rho(\mathbf{r})$ | $H(\mathbf{r})$ |
|-----|--------------------|----------------------------|-----------------|
| #1  | 0.002696735386     | 0.01018573320              | 0.0007224062133 |
| #2  | 0.0009630038965    | 0.003544045180             | 0.0002575394580 |

|    |                |                |                 |
|----|----------------|----------------|-----------------|
| #3 | 0.002273823597 | 0.007006044773 | 0.0004249505022 |
| #4 | 0.005966468459 | 0.01720689958  | 0.0007228245874 |
| #5 | 0.005892419053 | 0.01687801384  | 0.0007236948608 |

**Figure S6: The illustration of bond critical points in TS16 and TS26**

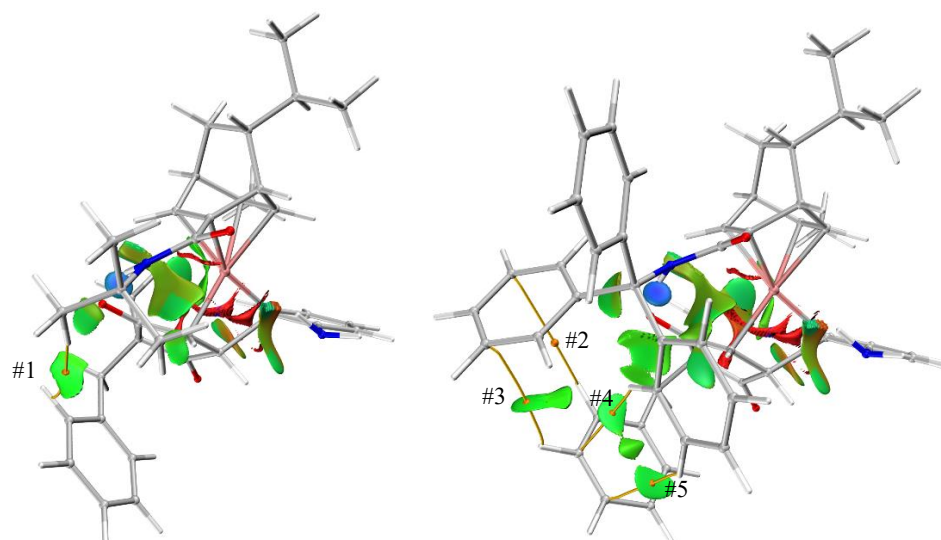

The surface distance projection maps were displayed from  $-0.5 \text{ \AA}$  to  $3.5 \text{ \AA}$  centered on the rhodium atom.<sup>6h</sup> An illustration of the surface distance projection maps was given in figure S7.

**Figure S7: The illustration of surface distance projection maps (TS16)**

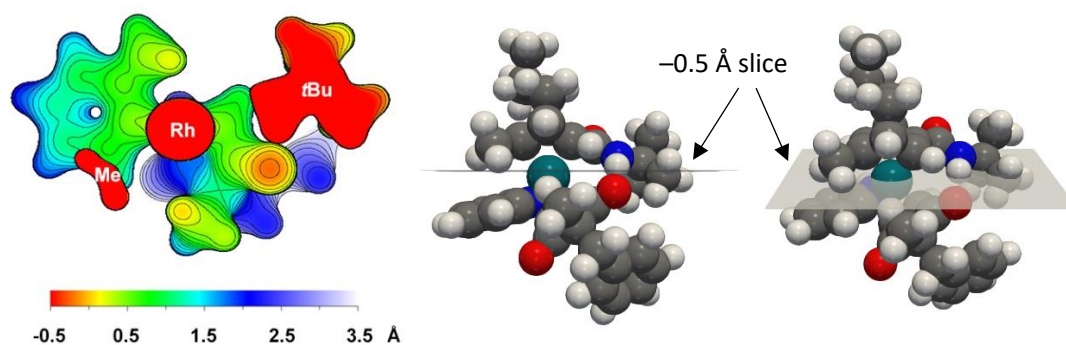

---

## 7. References

1. (a) K. Okamoto, T. Hayashi and V. H. Rawal. *Chem. Commun.* **2009**, 4815–4817. (b) T. Nishimura, A. Noishiki, G. C. Tsui, T. Hayashi. *J. Am. Chem. Soc.* **2012**, 134, 5056–5059. (c) B. Ye, J. Yao, C. Wu, H. Zhu, W. Yao, L. Jin, X. Dou. *ACS Catal.* **2022**, 12, 2434–2440. (d) T. Yasukawa, A. Suzuki, H. Miyamura, K. Nishino, S. Kobayashi. *J. Am. Chem. Soc.* **2015**, 137, 6616–6623. (e) A. Saxenaa, H. W. Lam. *Chem. Sci.* **2011**, 2, 2326–2331. (f) I. D. Roy, A. R. Burns, G. Pattison, B. Michel, A. J. Parkerc, H. W. Lam. *Chem. Commun.* **2014**, 50, 2865–2868. (g) K. Okamoto, A. Nanya, A. Eguchi, K. Ohe. *Angew. Chem. Int. Ed.* **2018**, 57, 1039–1043.
2. (a) M. R. Smith III, R. Bisht, C. Haldar, G. Pandey, J. E. Dannatt, B. Ghaffari, R. E. Maleczka Jr., B. Chattopadhyay. *ACS Catal.* **2018**, 8, 6216–6223. (b) T. Deng, W. Mazumdar, R. L. Ford, N. Jana, R. Izar, D. J. Wink, T. G. Driver. *J. Am. Chem. Soc.* **2020**, 142, 4456–4463. (c) Heather Lam, Jennifer Tsoung, Mark Lautens. *J. Org. Chem.* **2017**, 82, 6089–6099.
3. (a) M. S. Mannaa, S. Mukherjee. *Chem. Sci.* **2014**, 5, 1627–1633. (b) T. Das, P. Saha, V. K. Singh. *Org. Lett.* **2015**, 17, 5088–5091. (c) F. Vetica, S. Bailey, P. Chauhan, M. Turberg, A. Ghaur, G. Raabe, D. Enders. *Adv. Synth. Catal.* **2017**, 359, 3729–3734. (d) X. Dou, Y. Lu, T. Hayashi. *Angew. Chem. Int. Ed.* **2016**, 55, 6739–6743. (e) S. E. Walker, C. J. C. Lamb, N. A. Beattie, P. Nikodemiak, A.-L. Lee. *Chem. Commun.* **2015**, 51, 4089–4092. (f) D. B. Ramachary, M. Kishor. *Org. Biomol. Chem.* **2008**, 6, 4176–4187. (g) S. Mattsson, M. Dahlström, S. Karlsson. *Tetrahedron Lett.* **2007**, 48, 2497–2499.
4. (a) F. Neese. *WIREs Comput. Mol. Sci.* **2012**, 2, 73–78. (b) F. Neese. *WIREs Comput. Mol. Sci.* **2018**, 8, e1327. (c) F. Neese, F. Wennmohs, U. Becker, C. Riplinger. *J. Chem. Phys.* **2020**, 152, 224108. (d) F. Neese. *WIREs Comput. Mol. Sci.* **2022**, 12, e1606. (e) C. Bannwarth, E. Caldeweyher, S. Ehlert, A. Hansen, P. Pracht, J. Seibert, S. Spicher, S. Grimme. *WIREs Comput. Mol. Sci.* **2020**, 11, e01493. (f) S. Grimme, C. Bannwarth, P. Shushkov, *J. Chem. Theory Comput.* **2017**, 13, 1989–2009. (g) C. Bannwarth, S. Ehlert, S. Grimme. *J. Chem. Theory Comput.* **2019**, 15, 1652–1671.
5. (a) P. J. Stephens, F. J. Devlin, C. F. Chabalowski, M. J. Frisch. *J. Phys. Chem.* **1994**, 98, 11623–11627. (b) C. Adamo, V. Barone. *J. Chem. Phys.* **1999**, 110, 6158–6170. (c) Y. Zhao, D. G. Truhlar. *Theor. Chem. Acc.* **2007**, 120, 215–241. (d) L. Goerigk, S. Grimme. *J. Chem. Theory Comput.* **2011**, 7, 291–309. (e) F. Weigend, R. Ahlrichs. *Phys. Chem. Chem. Phys.* **2005**, 7, 3297–3305. (f) F. Weigend. *Phys. Chem. Chem. Phys.*

---

**2006**, 8, 1057–1065. (g) F. Weigend. *J Comput. Chem.* **2008**, 29, 167–175. (h) F. Neese, F. Wennmohs, A. Hansen, U. Becker. *Chem. Phys.* **2009**, 356, 98–109. (i) E. Caldeweyher, C. Bannwarth, S. Grimme. *J Chem Phys.* **2017**, 147, 034112. (j) V. Barone, M. Cossi. *J. Phys. Chem. A* **1998**, 102, 1995–2001. (k) A. V. Marenich, C. J. Cramer, D. G. Truhlar. *J. Phys. Chem. B* **2009**, 113, 6378–6396.

6. (a) S. Grimme. *Chem. Eur. J.* **2012**, 18, 9955–9964. (b) I. M. Alecu, J. Zheng, Y. Zhao, D. G. Truhlar. *J. Chem. Theory Comput.* **2010**, 6, 2872–2887. (c) S. Grimme, A. Hansen. *Angew. Chem. Int. Ed.* **2015**, 54, 12308–12313. (d) T. Lu, F. Chen. *J. Comput. Chem.* **2012**, 33, 580–592. (e) G. Luchini, T. Patterson, R. S. Paton. DBSTEP: DFT Based Steric Parameters. **2022**, doi: 10.5281/zenodo.4702097. (f) E. R. Johnson, S. Keinan, P. Mori-Sánchez, J. Contreras-García, A. J. Cohen, W. Yang. *J. Am. Chem. Soc.* **2010**, 132, 6498–6506. (g) R. F. W. Bader. *Atoms in molecules: a quantum theory*. Clarendon Press, Oxford, **1994**, pp. 1–432. (h) A. Poater, F. Ragone, R. Mariz, R. Dorta, L. Cavallo. *Chem. Eur. J.* **2010**, 16, 14348–14353.

7. (a) J. Zhang, M. Dolg. *Phys. Chem. Chem. Phys.* **2015**, 17, 24173–24181. (b) J. Zhang, M. Dolg. *Phys. Chem. Chem. Phys.* **2016**, 18, 3003–3010.

8. (a) W. Humphrey, A. Dalke, K. Schulten. *J. Molec. Graphics* **1996**, 14, 33–38. (b) C. Y. Legault. CYLview20, Université de Sherbrooke, 2020 ([www.cylview.org](http://www.cylview.org)). (c) J. D. Hunter. *Comput. Sci. Eng.* **2007**, 9, 90–95. (d) Z. Wang. EnePro1.6 ([github.com/wongzit/EnePro](https://github.com/wongzit/EnePro)).

9. E. A. B. Kantchev. *Chem. Sci.* **2013**, 4, 1864–1875.

10. (a) J. I. Seeman. *Chem. Rev.* **1983**, 83, 83–134. (b) J. E. Baldwin, A. S. Raghavan, B. A. Hess, L. Smentek. *J. Am. Chem. Soc.* **2006**, 128, 14854–14862. (c) I. H. Williams. *J. Phys. Org. Chem.* **2022**, 35, e4312.



## 8. Single Crystal X-ray Diffraction

Single crystal of **3aa** for X-ray diffraction was grown by liquid-liquid diffusion in a *n*-hexane/toluene binary solvent system in a 10 mL screw cap vial at room temperature. The X-ray data of **3aa** is deposited in the Cambridge Crystallographic Data Centre with a number of CCDC 2260854.

**Figure S8: ORTEP representation of the X-ray structure of enantiopure 3aa (thermal ellipsoids are drawn at 50% probability)**

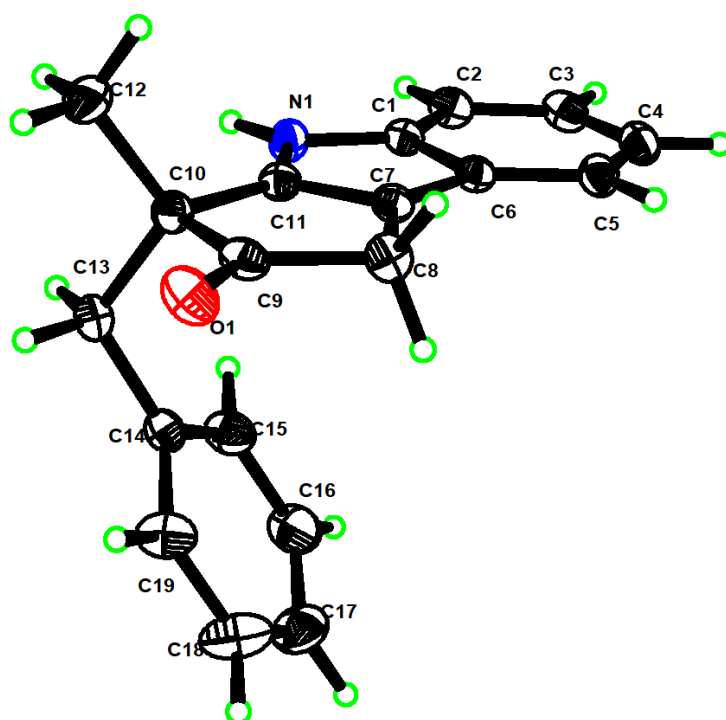

**Table S8: Crystal data and structure refinement for 3aa**

|                     |                                               |
|---------------------|-----------------------------------------------|
| Identification code | WCH262_0m                                     |
| Empirical formula   | C <sub>19</sub> H <sub>16</sub> NO            |
| Formula weight      | 274.33                                        |
| Temperature/K       | 170.0                                         |
| Crystal system      | orthorhombic                                  |
| Space group         | P2 <sub>1</sub> 2 <sub>1</sub> 2 <sub>1</sub> |
| a/Å                 | 9.1061(2)                                     |
| b/Å                 | 12.0634(2)                                    |
| c/Å                 | 14.0083(3)                                    |

---

|                                               |                                                               |
|-----------------------------------------------|---------------------------------------------------------------|
| $\alpha/^\circ$                               | 90                                                            |
| $\beta/^\circ$                                | 90                                                            |
| $\gamma/^\circ$                               | 90                                                            |
| Volume/ $\text{\AA}^3$                        | 1538.82(5)                                                    |
| Z                                             | 4                                                             |
| $\rho_{\text{calc}}/\text{cm}^3$              | 1.184                                                         |
| $\mu/\text{mm}^{-1}$                          | 0.571                                                         |
| F(000)                                        | 580.0                                                         |
| Crystal size/ $\text{mm}^3$                   | $0.15 \times 0.08 \times 0.05$                                |
| Radiation                                     | CuK $\alpha$ ( $\lambda = 1.54178$ )                          |
| $2\Theta$ range for data collection/ $^\circ$ | 9.676 to 149.092                                              |
| Index ranges                                  | $-9 \leq h \leq 11, -13 \leq k \leq 14, -17 \leq l \leq 17$   |
| Reflections collected                         | 14446                                                         |
| Independent reflections                       | 3105 [ $R_{\text{int}} = 0.0344, R_{\text{sigma}} = 0.0244$ ] |
| Data/restraints/parameters                    | 3105/0/191                                                    |
| Goodness-of-fit on $F^2$                      | 1.043                                                         |
| Final R indexes [ $I \geq 2\sigma(I)$ ]       | $R_1 = 0.0403, wR_2 = 0.1089$                                 |
| Final R indexes [all data]                    | $R_1 = 0.0425, wR_2 = 0.1116$                                 |
| Largest diff. peak/hole / $e \text{\AA}^{-3}$ | 0.36/-0.37                                                    |
| Flack parameter                               | 0.03(11)                                                      |

## 9. NMR Spectra

**3aa**  $^1\text{H}$  NMR (400 MHz,  $\text{DMSO-}d_6$ )/ $^{13}\text{C}$  NMR (75 MHz,  $\text{DMSO-}d_6$ )

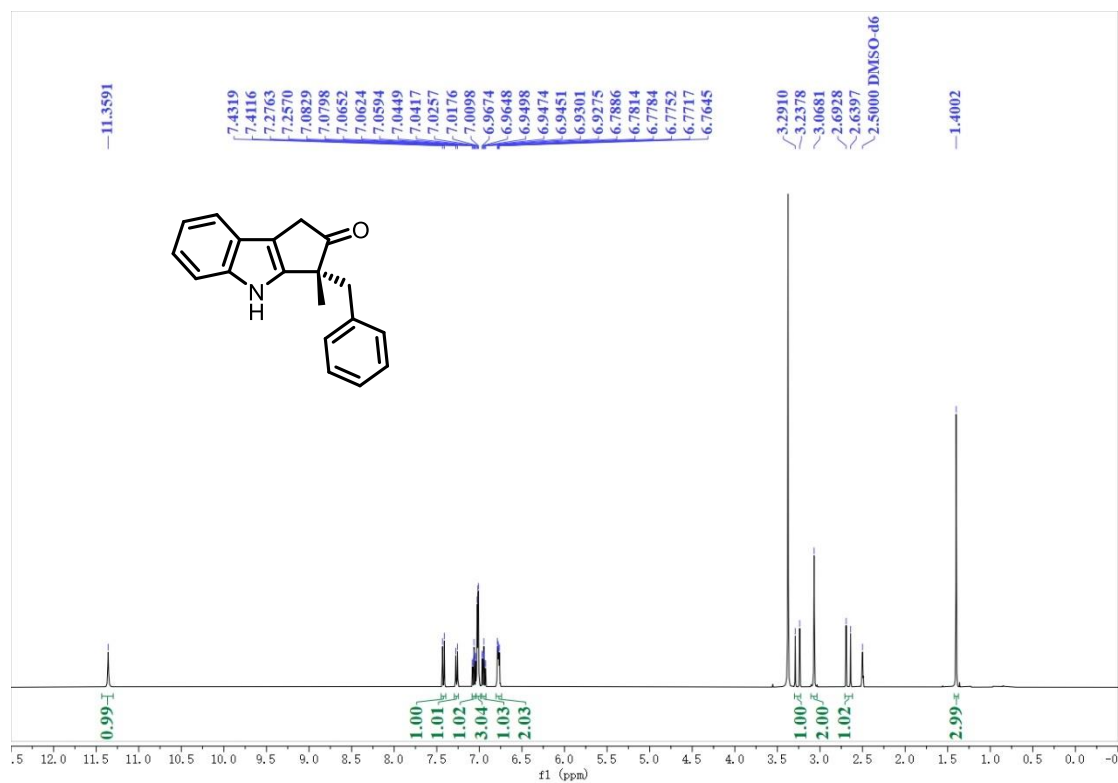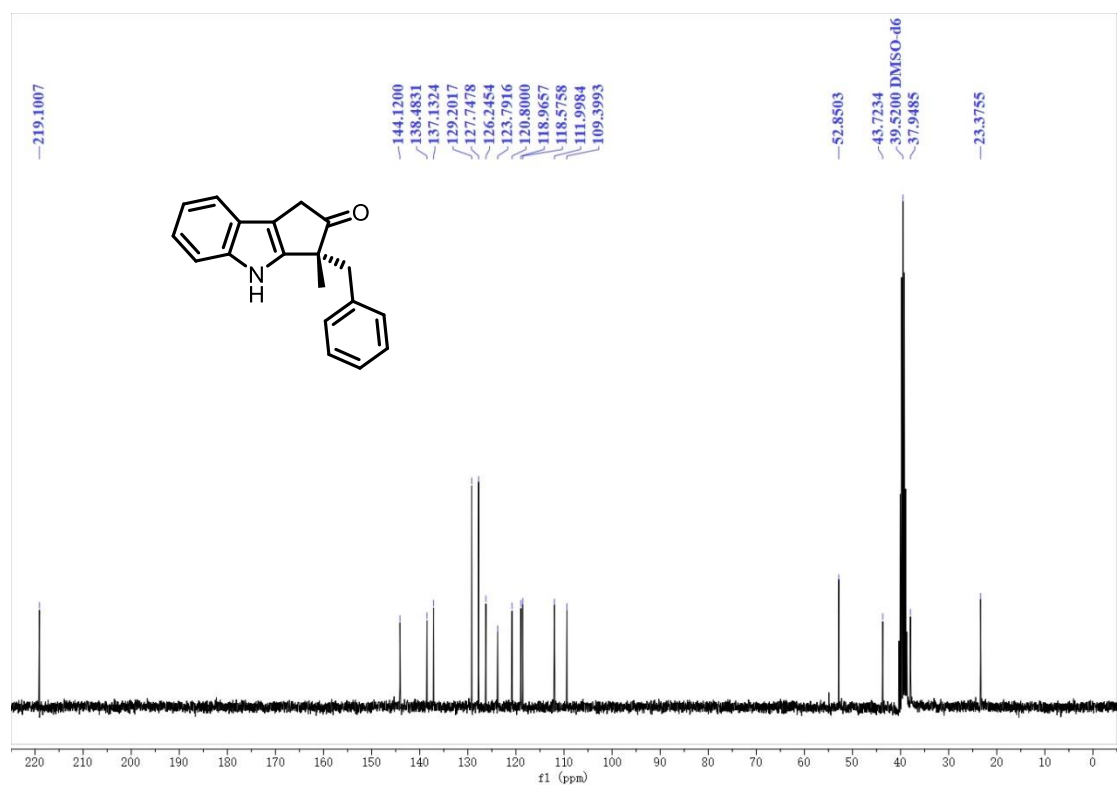

**3ba**  $^1\text{H}$  NMR (300 MHz,  $\text{DMSO-}d_6$ )/ $^{13}\text{C}$  NMR (75 MHz,  $\text{DMSO-}d_6$ )

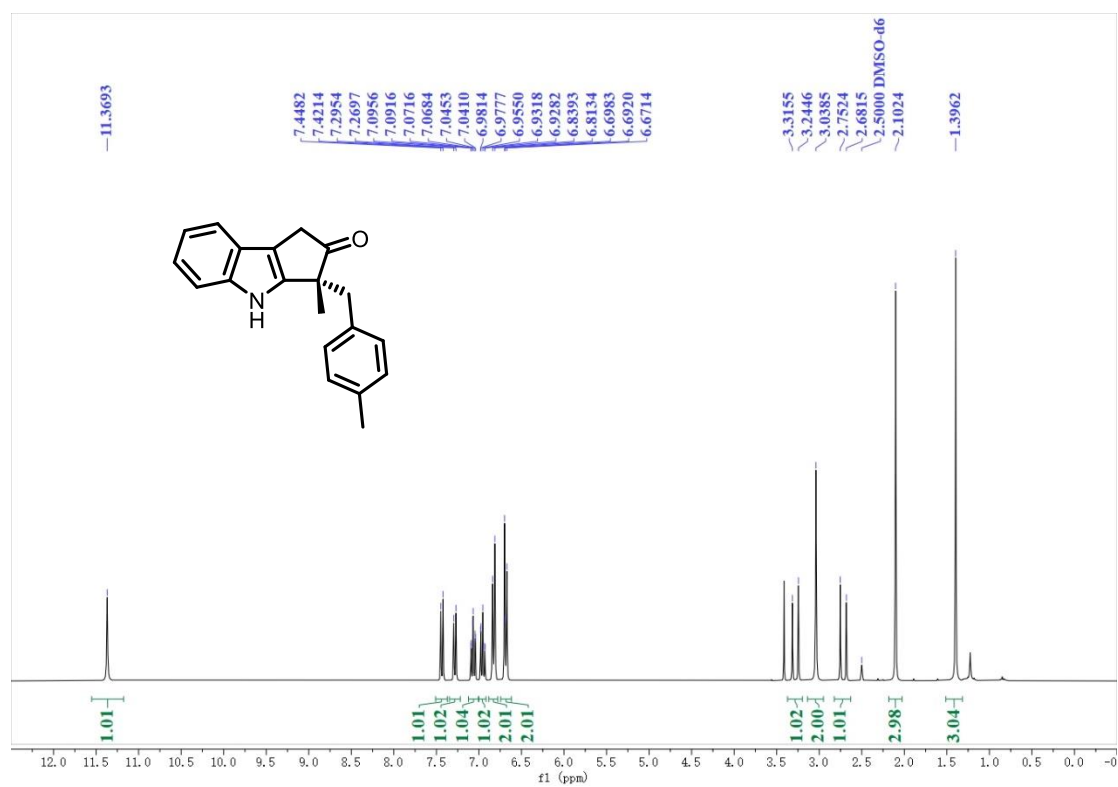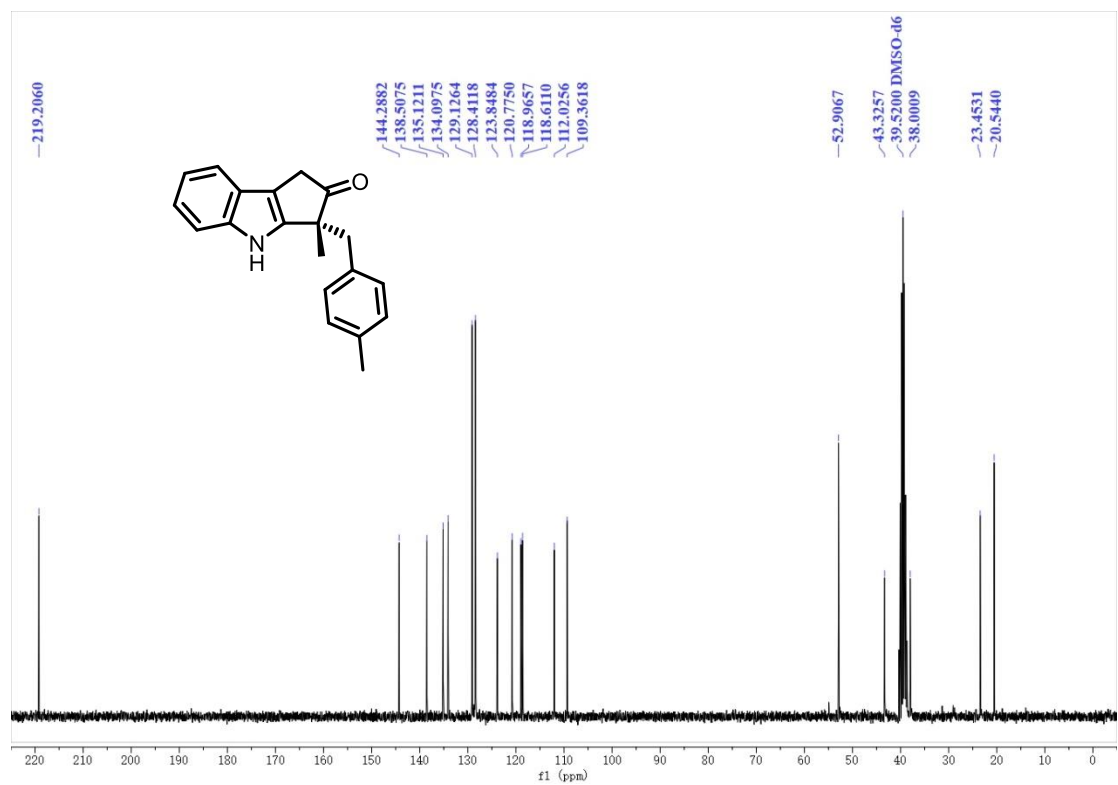

**3ca**  $^1\text{H}$  NMR (300 MHz,  $\text{DMSO-}d_6$ )/ $^{13}\text{C}$  NMR (75 MHz,  $\text{DMSO-}d_6$ )

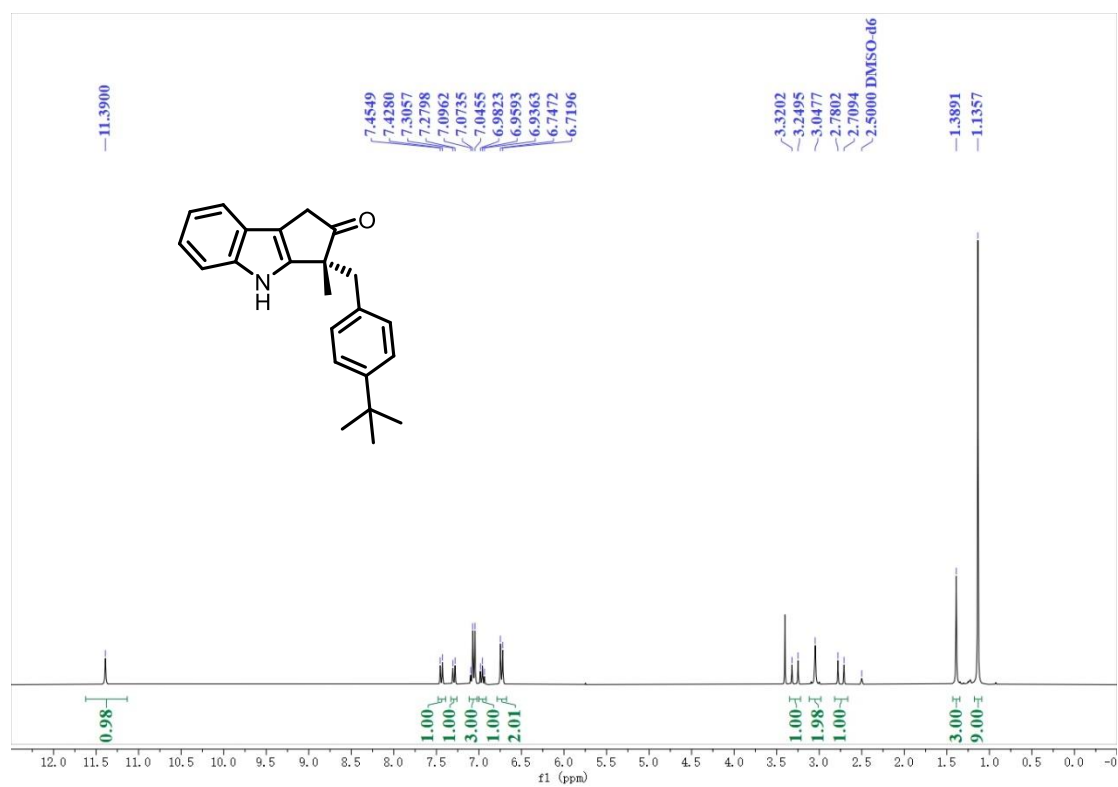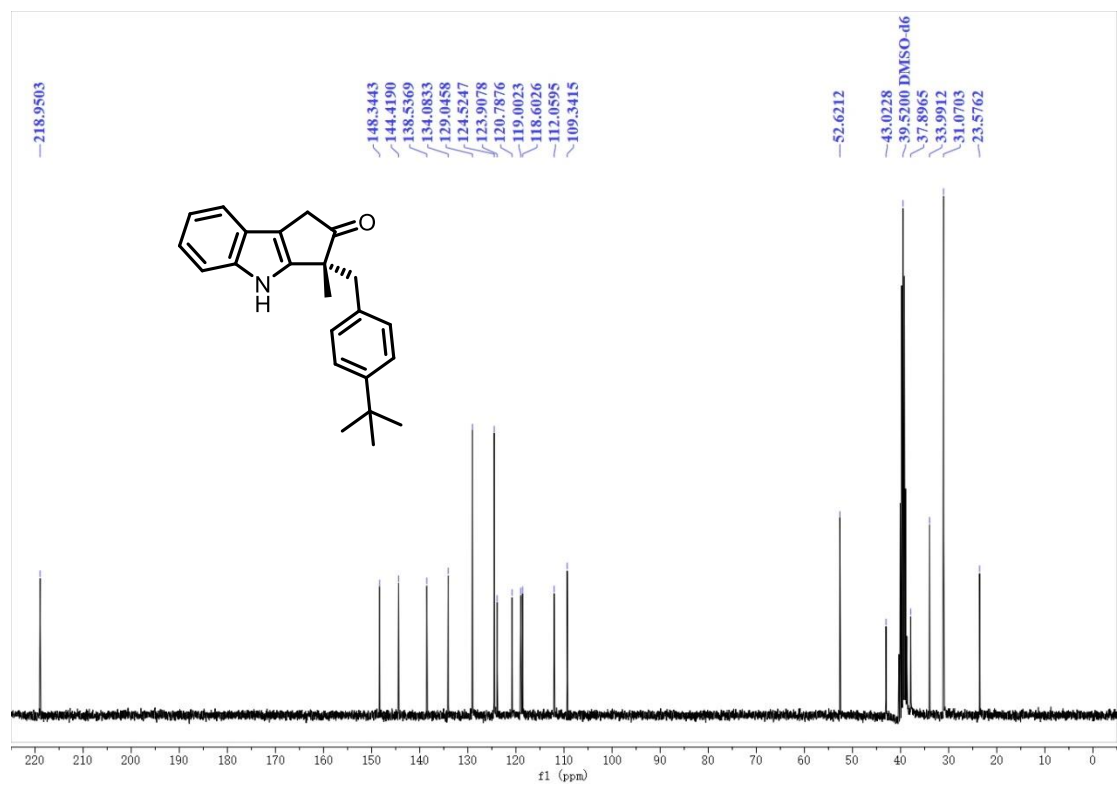

**3da**  $^1\text{H}$  NMR (400 MHz,  $\text{DMSO-}d_6$ )/ $^{13}\text{C}$  NMR (101 MHz,  $\text{DMSO-}d_6$ )

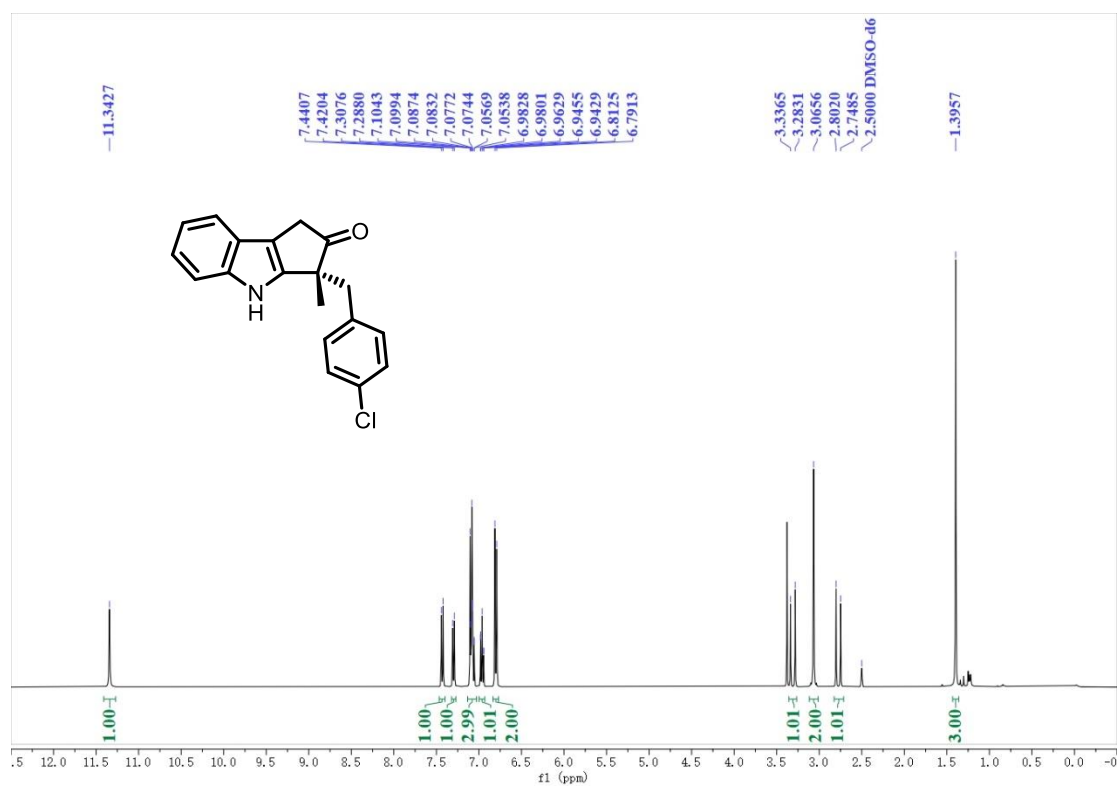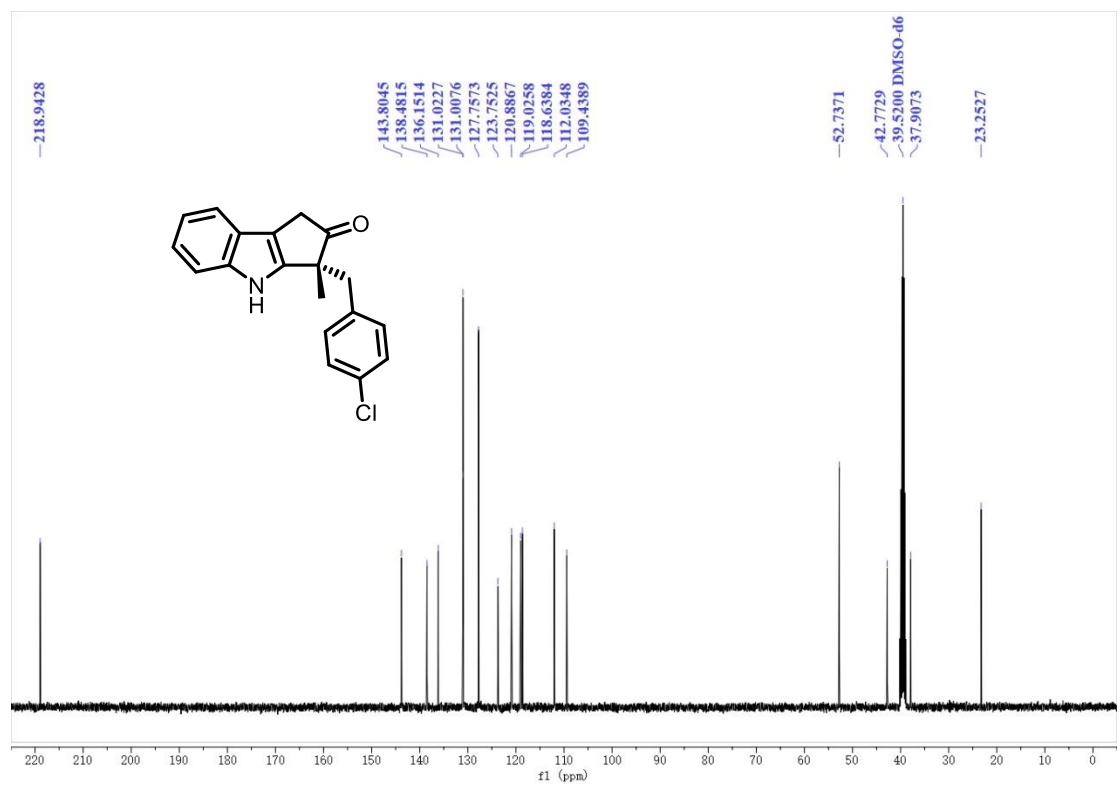

3ea  $^1\text{H}$  NMR (300 MHz,  $\text{DMSO-}d_6$ )/ $^{13}\text{C}$  NMR (75 MHz,  $\text{DMSO-}d_6$ )

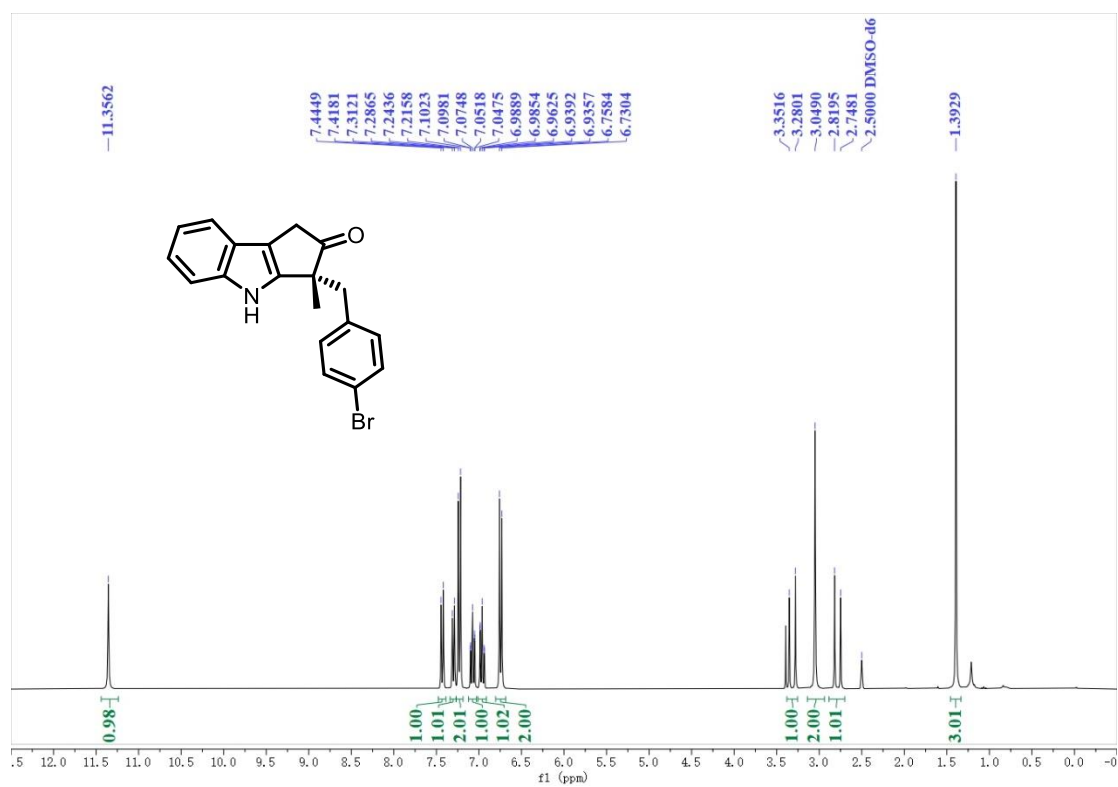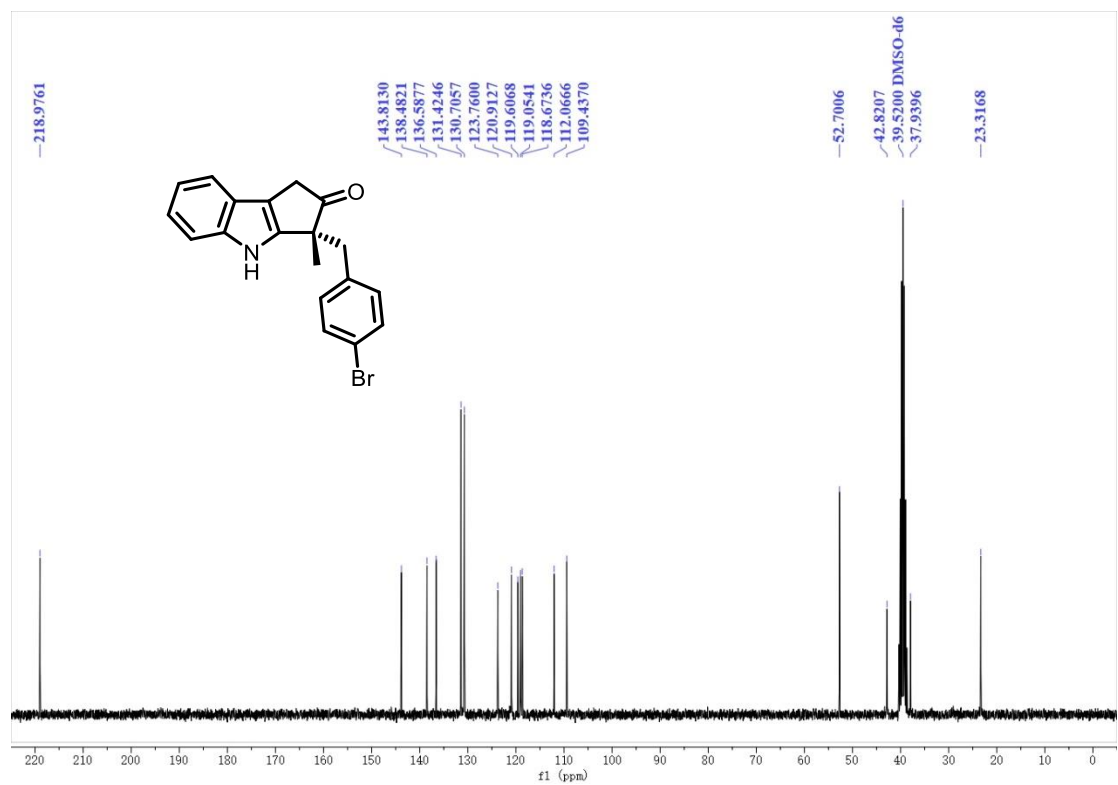

**3fa**  $^1\text{H}$  NMR (300 MHz,  $\text{DMSO-}d_6$ )/ $^{13}\text{C}$  NMR (75 MHz,  $\text{DMSO-}d_6$ )

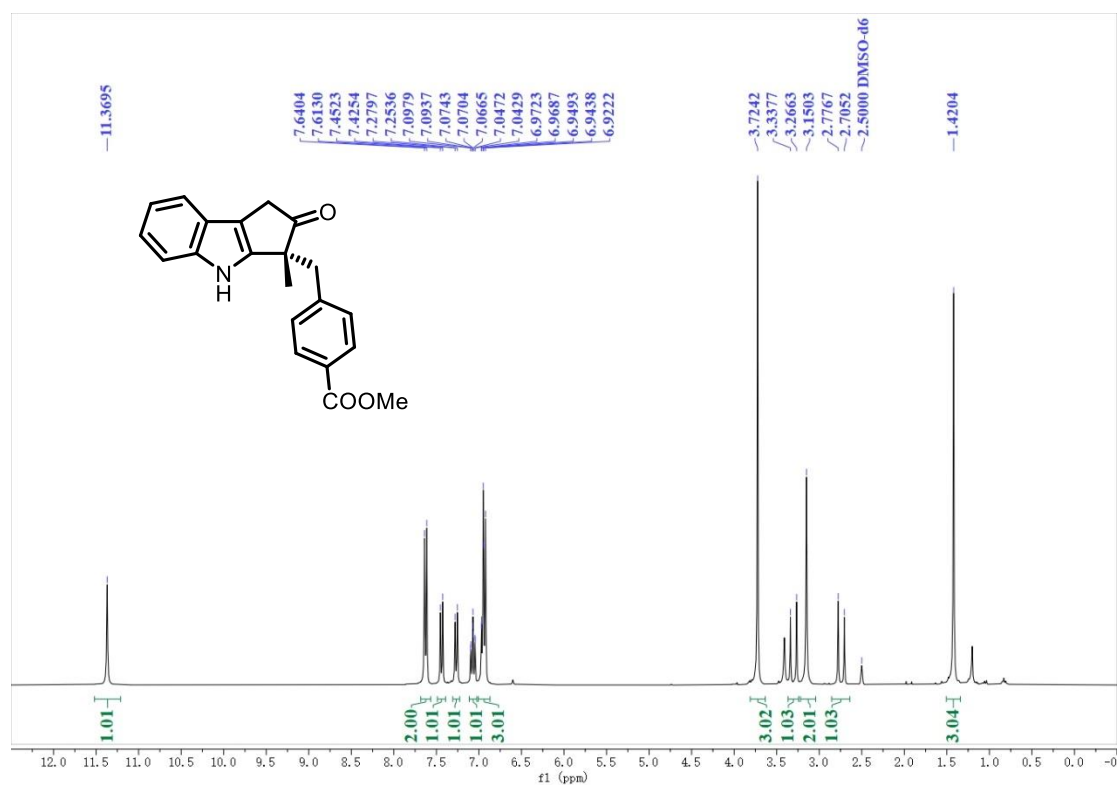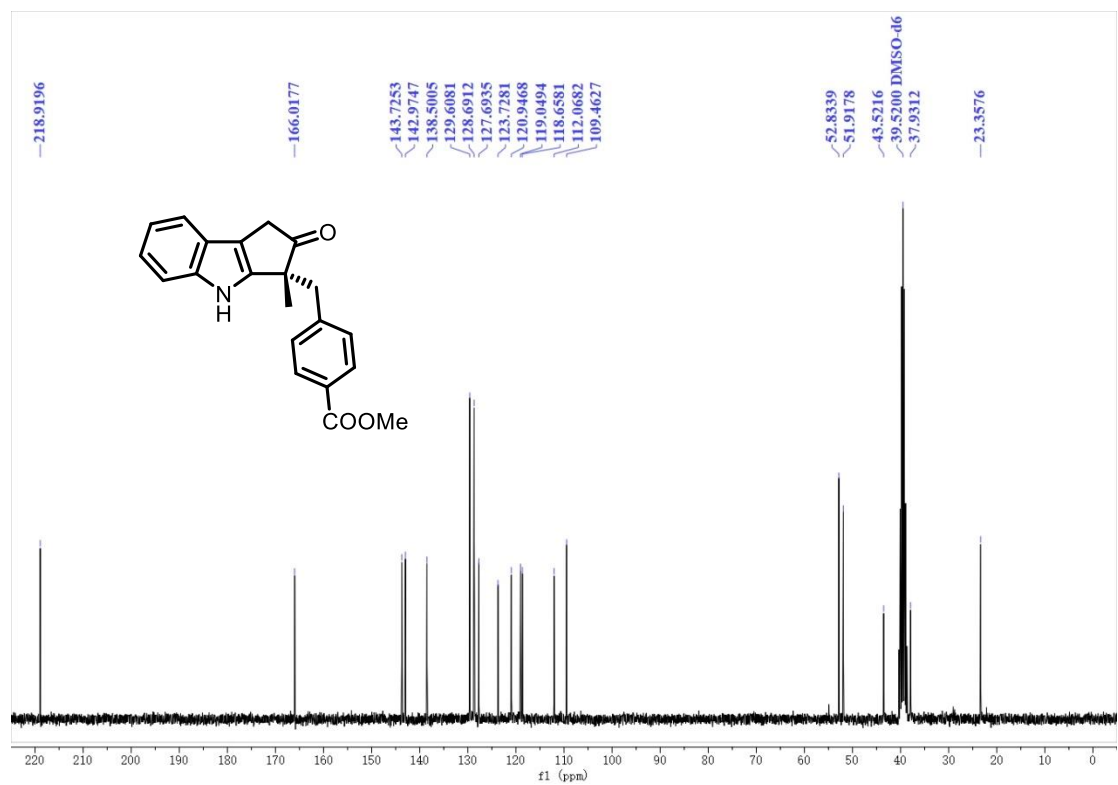



3ga  $^1\text{H}$  NMR (300 MHz,  $\text{DMSO-}d_6$ )/ $^{13}\text{C}$  NMR (75 MHz,  $\text{DMSO-}d_6$ )

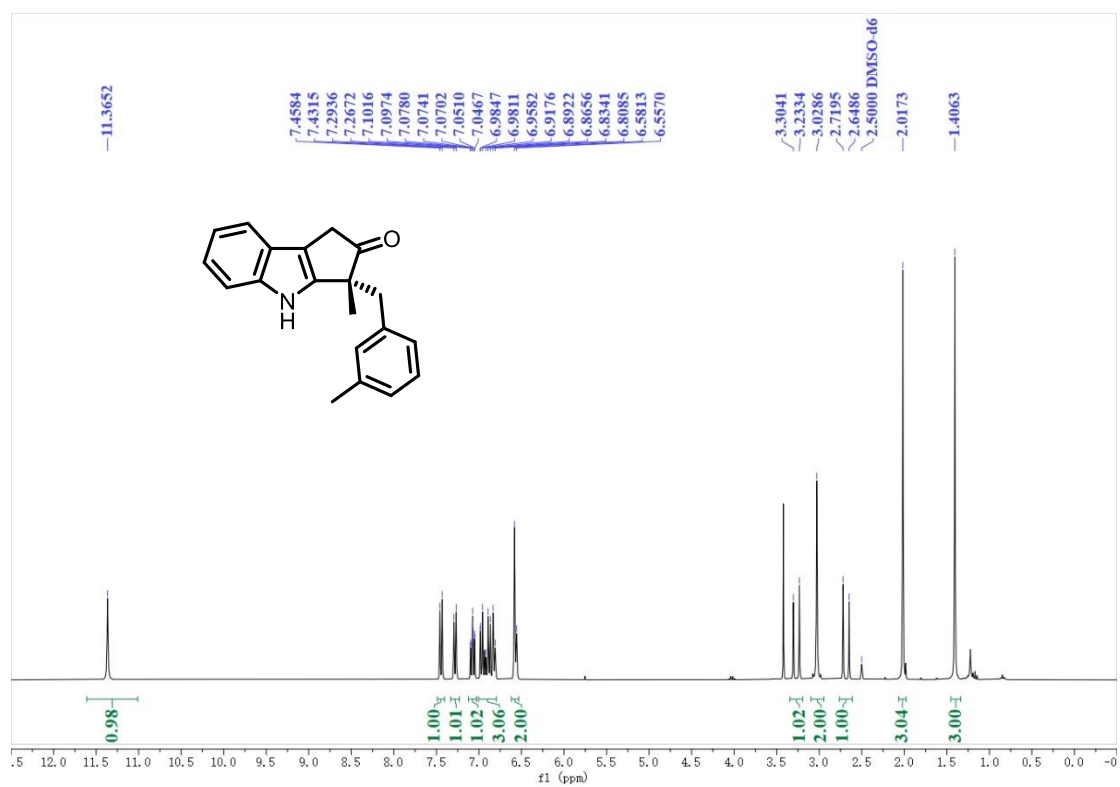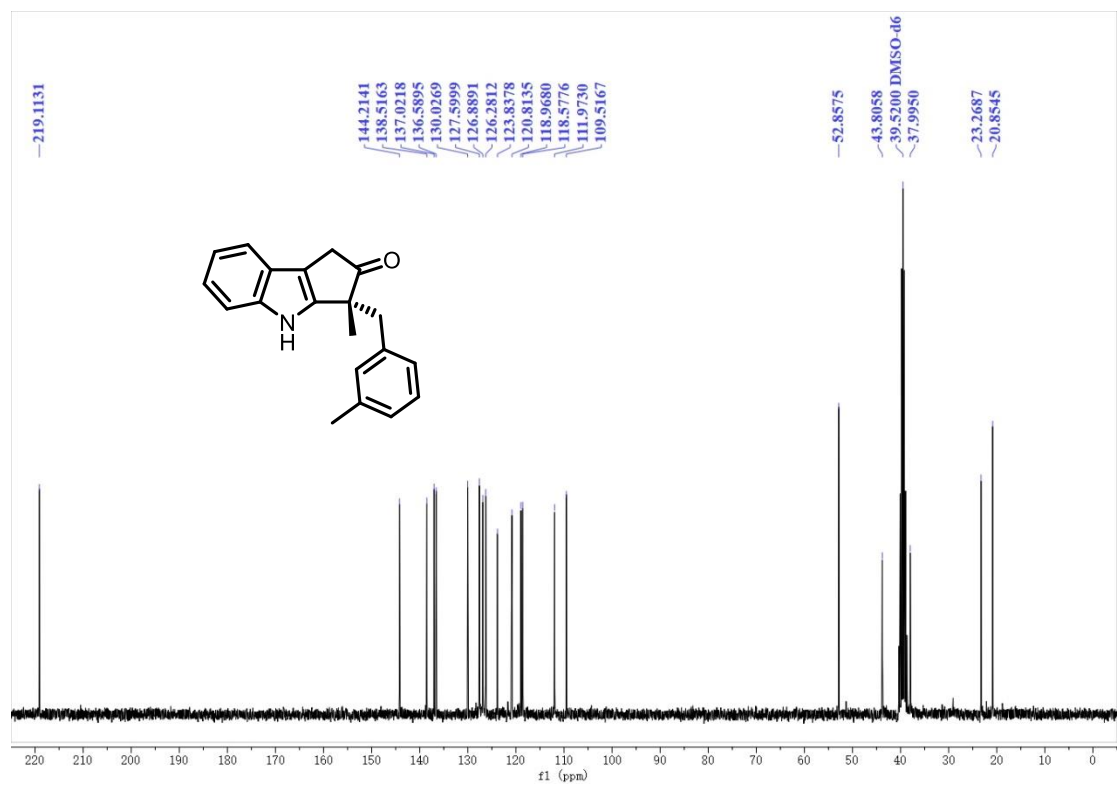

**3ha**  $^1\text{H}$  NMR (400 MHz,  $\text{DMSO-}d_6$ )/ $^{13}\text{C}$  NMR (101 MHz,  $\text{DMSO-}d_6$ )

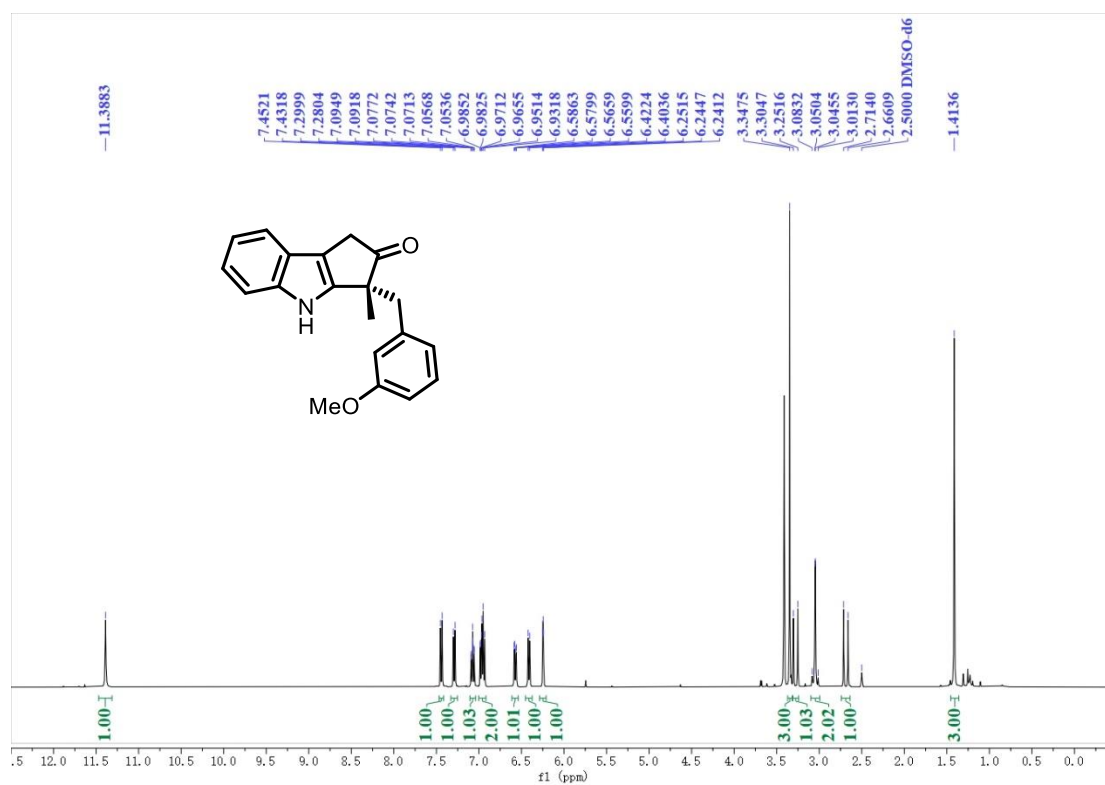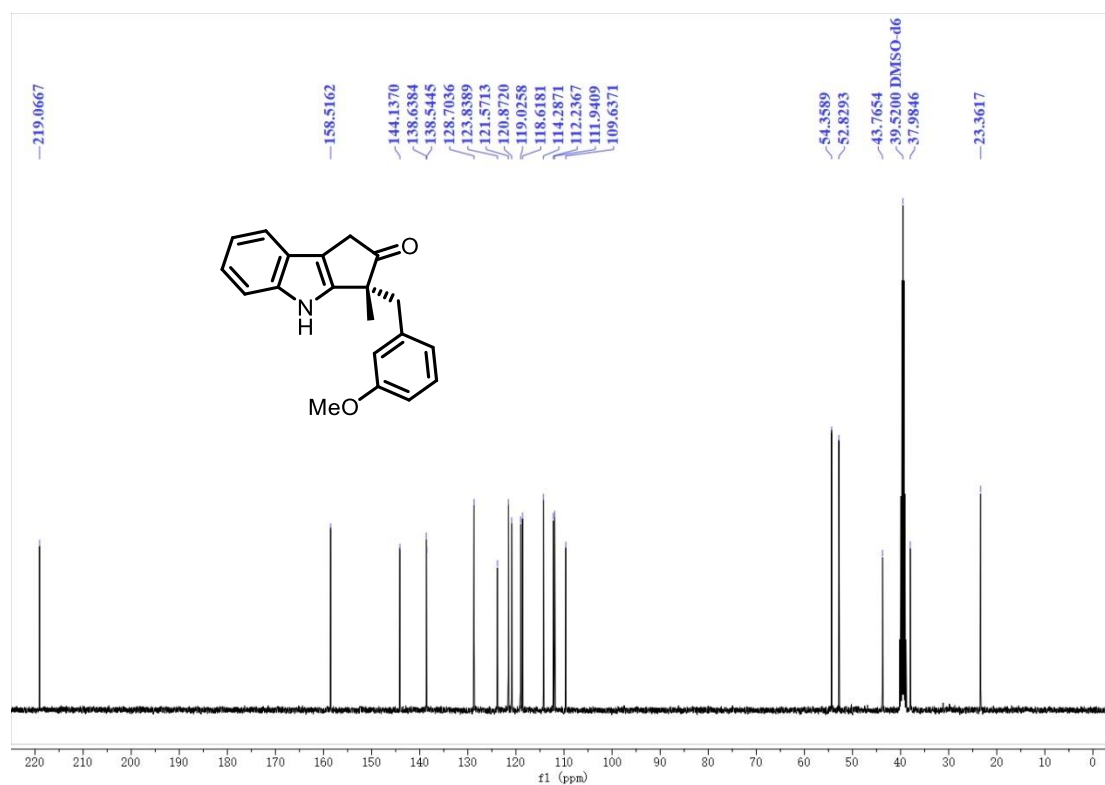

**3ia**  $^1\text{H}$  NMR (300 MHz,  $\text{DMSO-}d_6$ )/ $^{13}\text{C}$  NMR (75 MHz,  $\text{DMSO-}d_6$ )

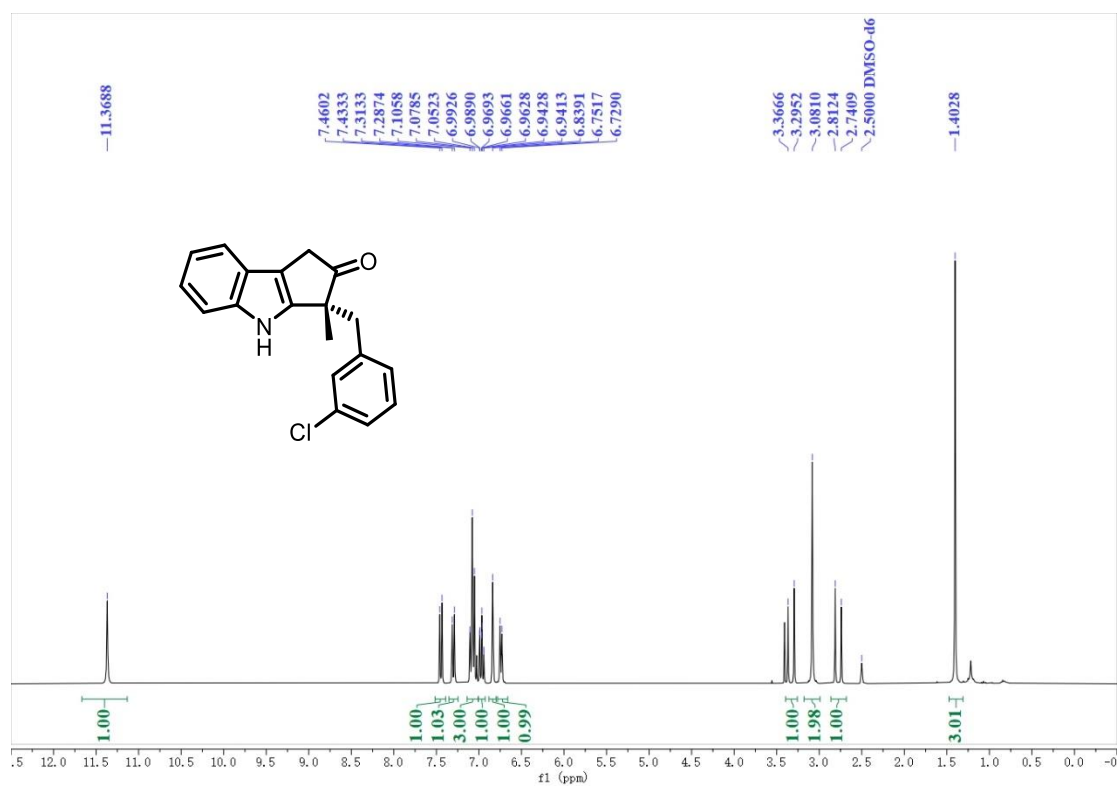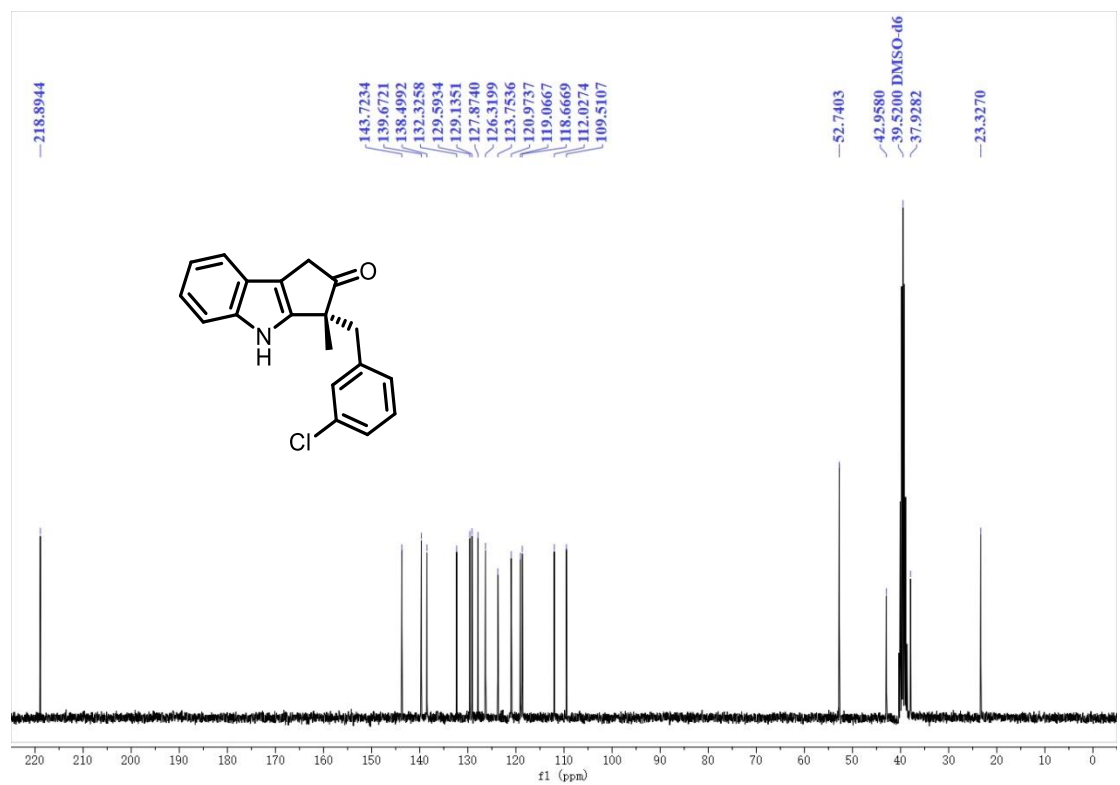

**3ja**  $^1\text{H}$  NMR (300 MHz,  $\text{DMSO-}d_6$ )/ $^{13}\text{C}$  NMR (75 MHz,  $\text{DMSO-}d_6$ )

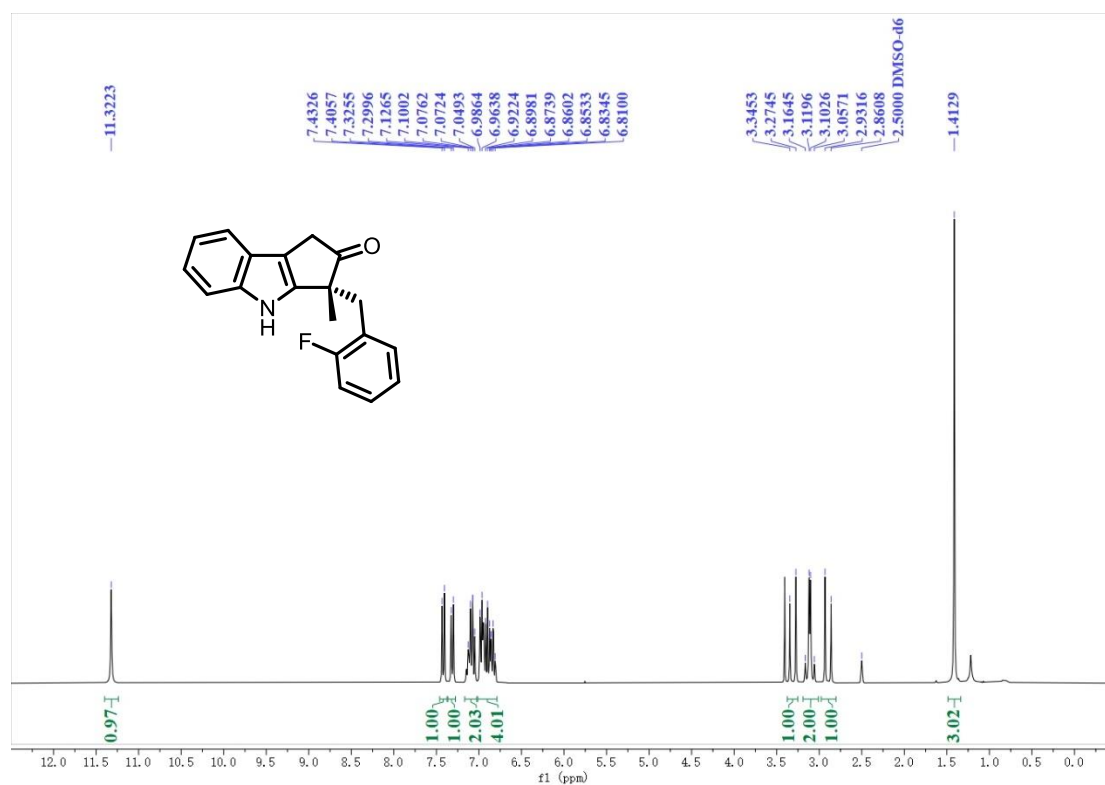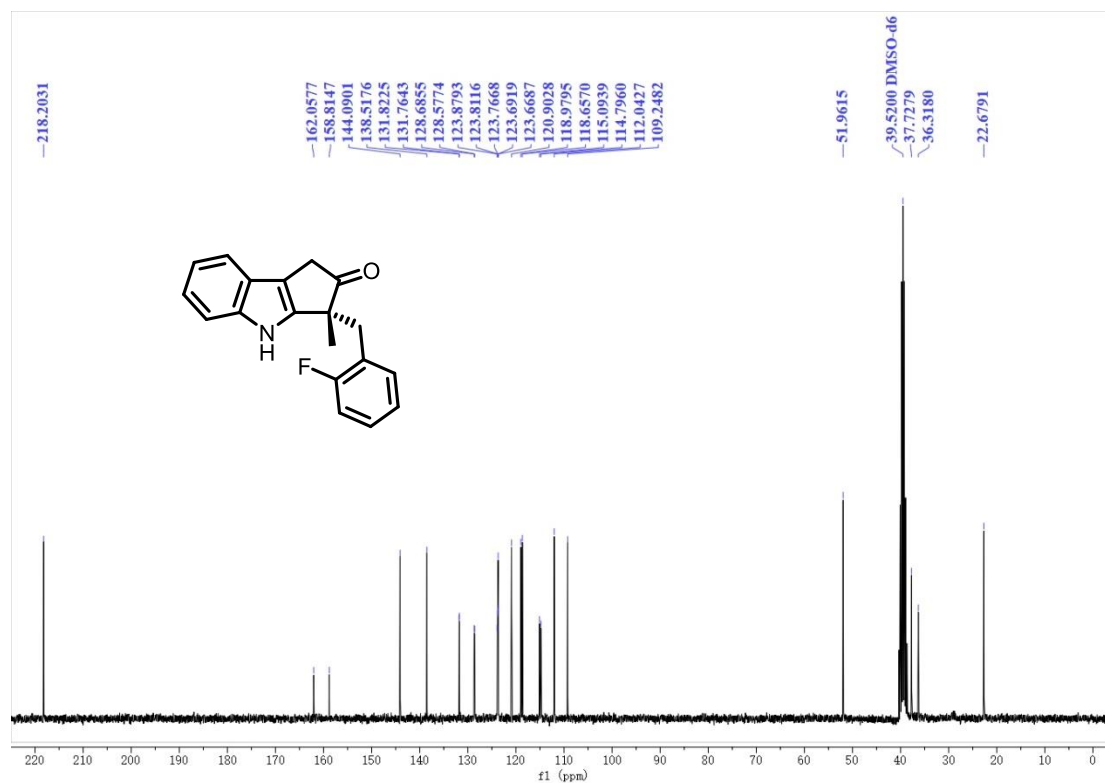

**3ja**  $^{19}\text{F}$  NMR (282 MHz,  $\text{DMSO-}d_6$ )

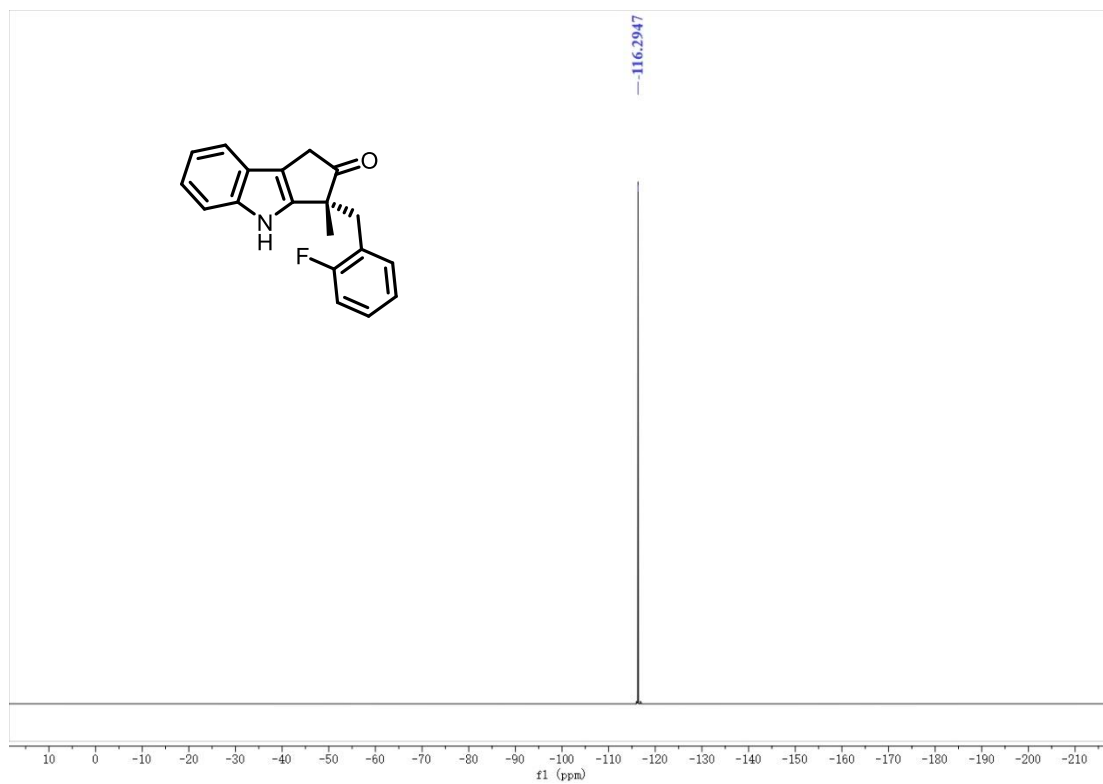

**3ka**  $^1\text{H}$  NMR (300 MHz,  $\text{DMSO-}d_6$ )/ $^{13}\text{C}$  NMR (75 MHz,  $\text{DMSO-}d_6$ )

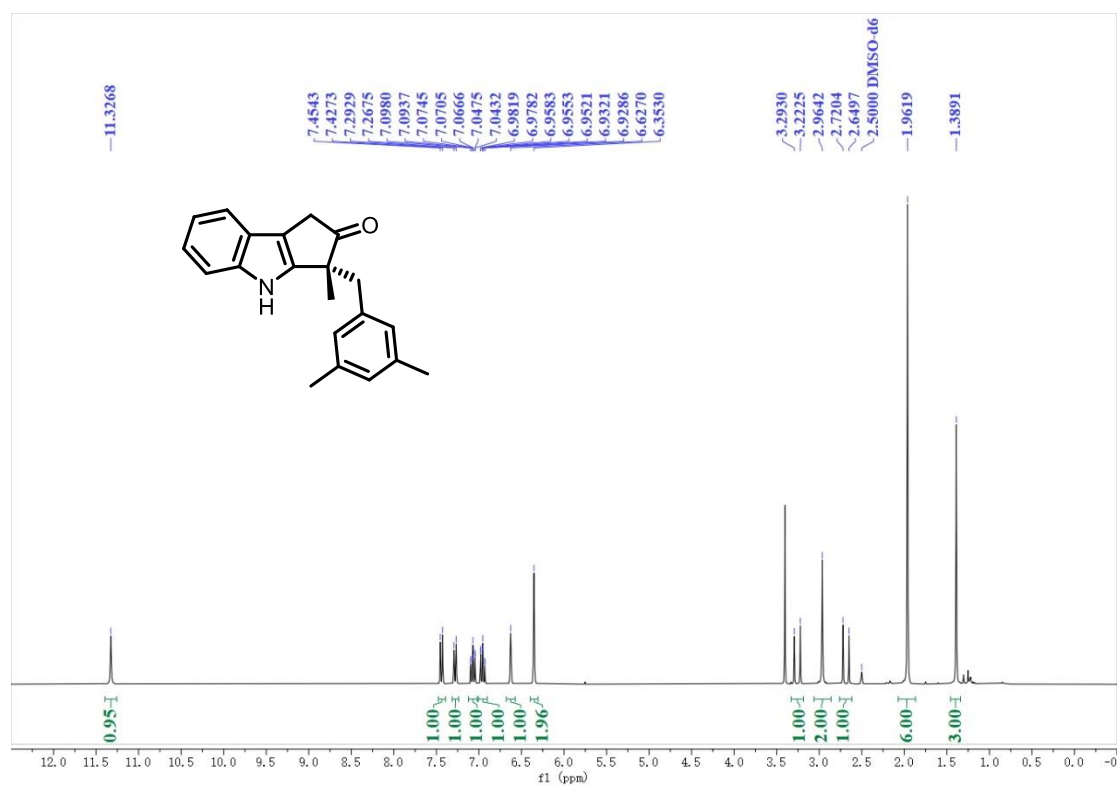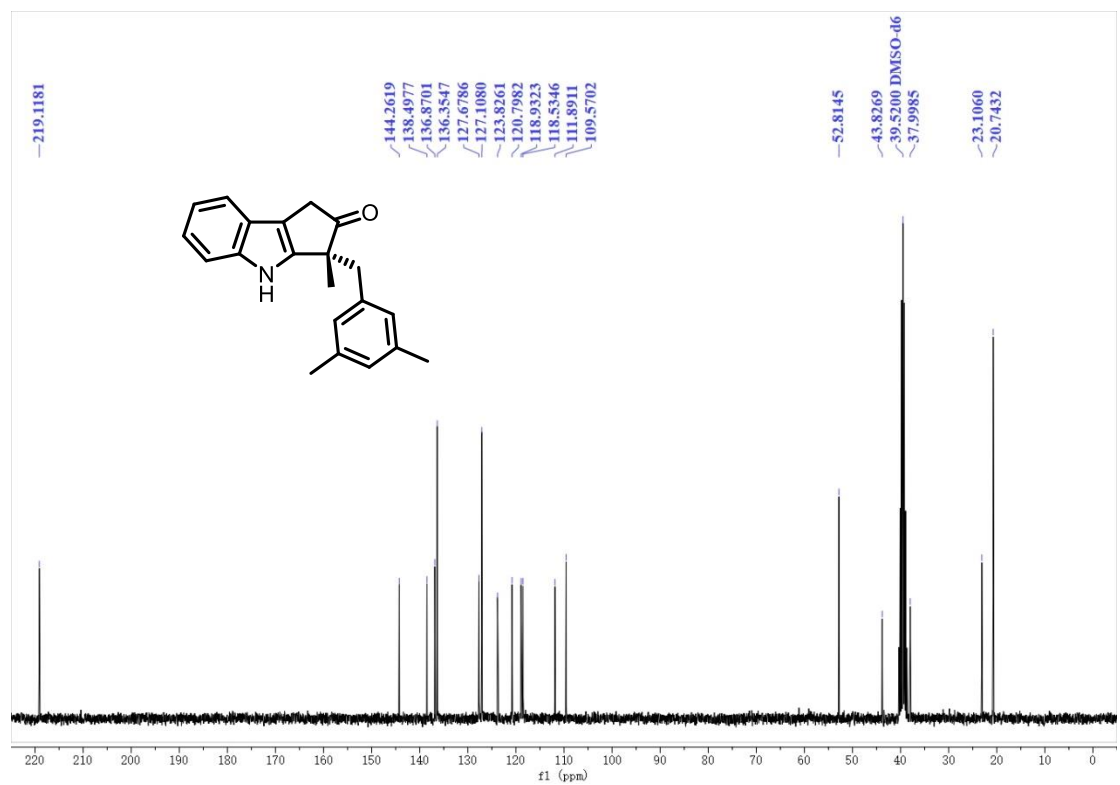

**3la**  $^1\text{H}$  NMR (300 MHz,  $\text{DMSO-}d_6$ )/ $^{13}\text{C}$  NMR (75 MHz,  $\text{DMSO-}d_6$ )

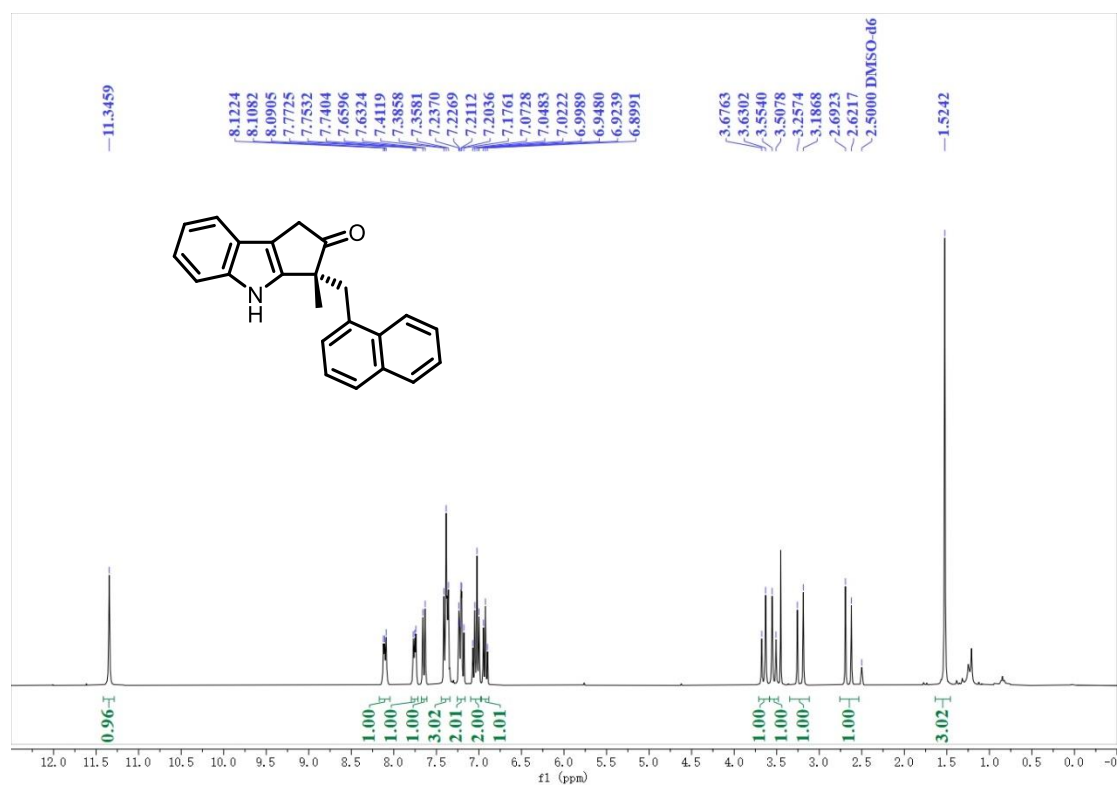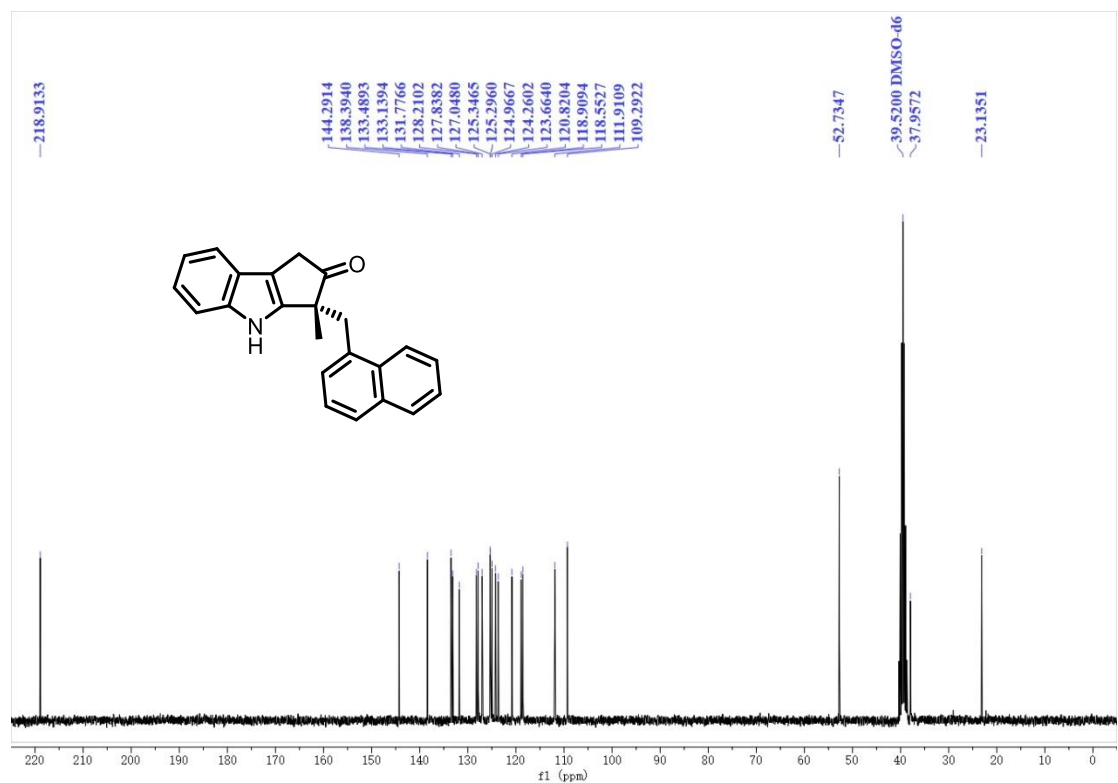

**3ma**  $^1\text{H}$  NMR (300 MHz,  $\text{DMSO-}d_6$ )/ $^{13}\text{C}$  NMR (75 MHz,  $\text{DMSO-}d_6$ )

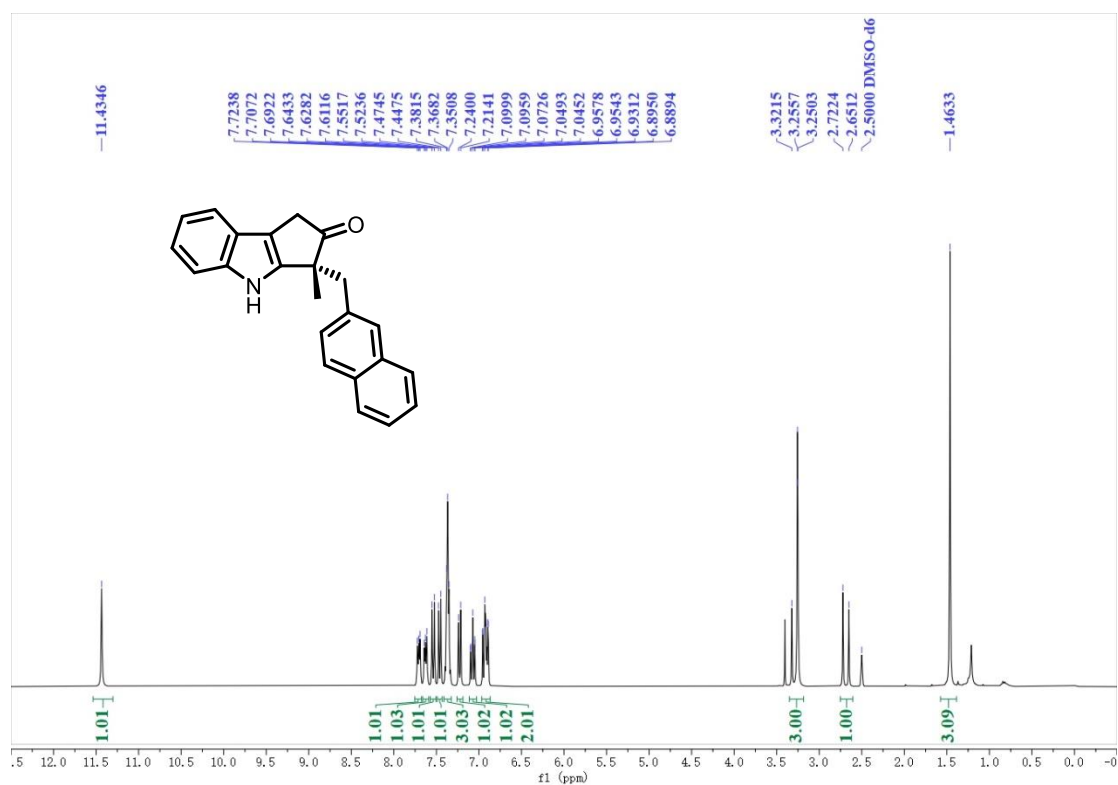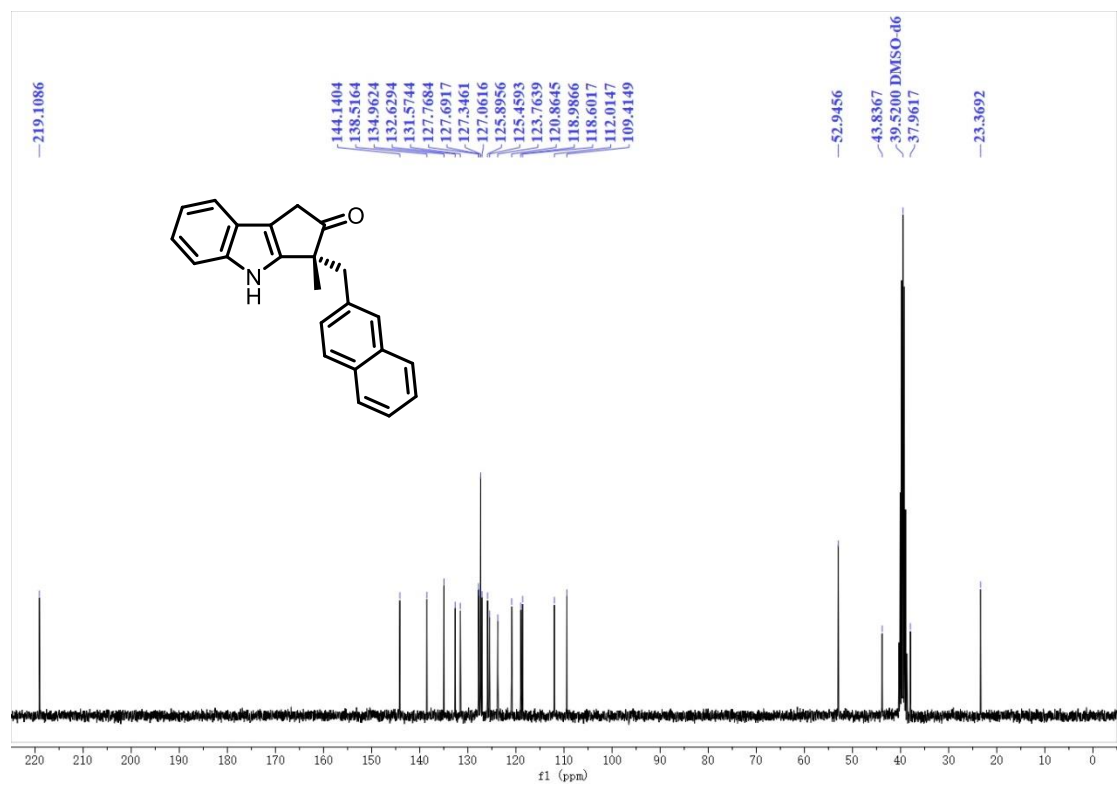



**3na**  $^1\text{H}$  NMR (400 MHz,  $\text{DMSO-}d_6$ )/ $^{13}\text{C}$  NMR (101 MHz,  $\text{DMSO-}d_6$ )

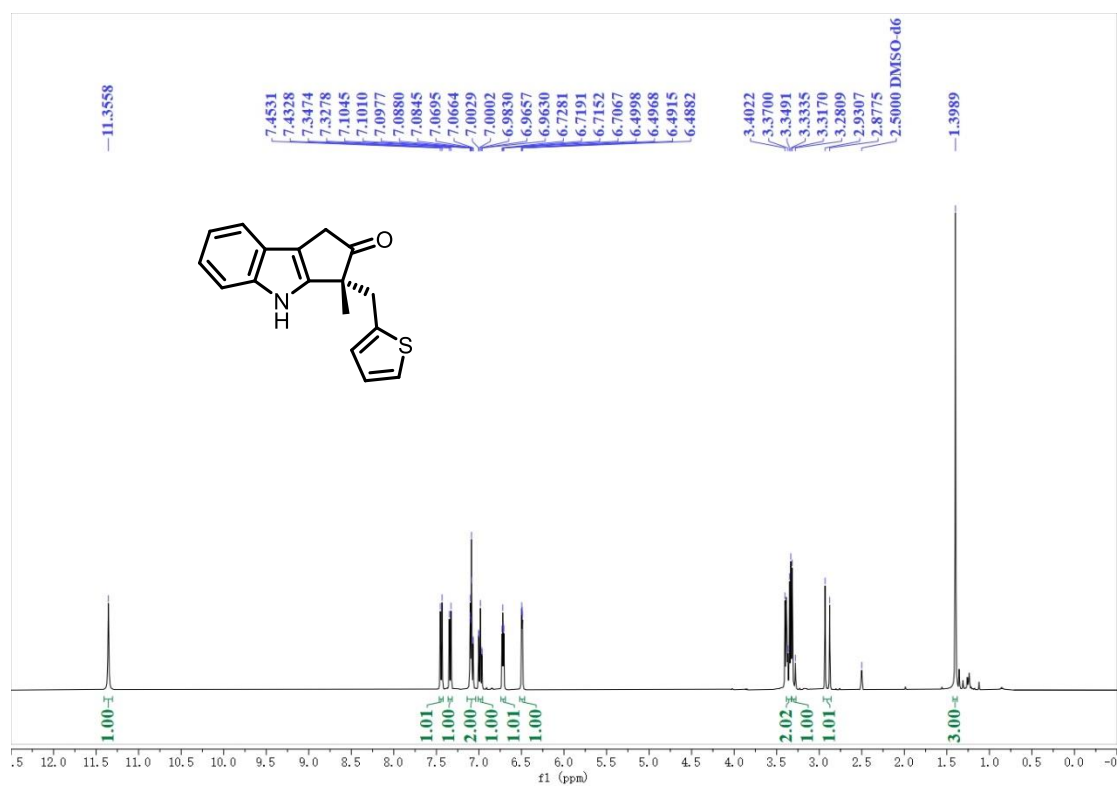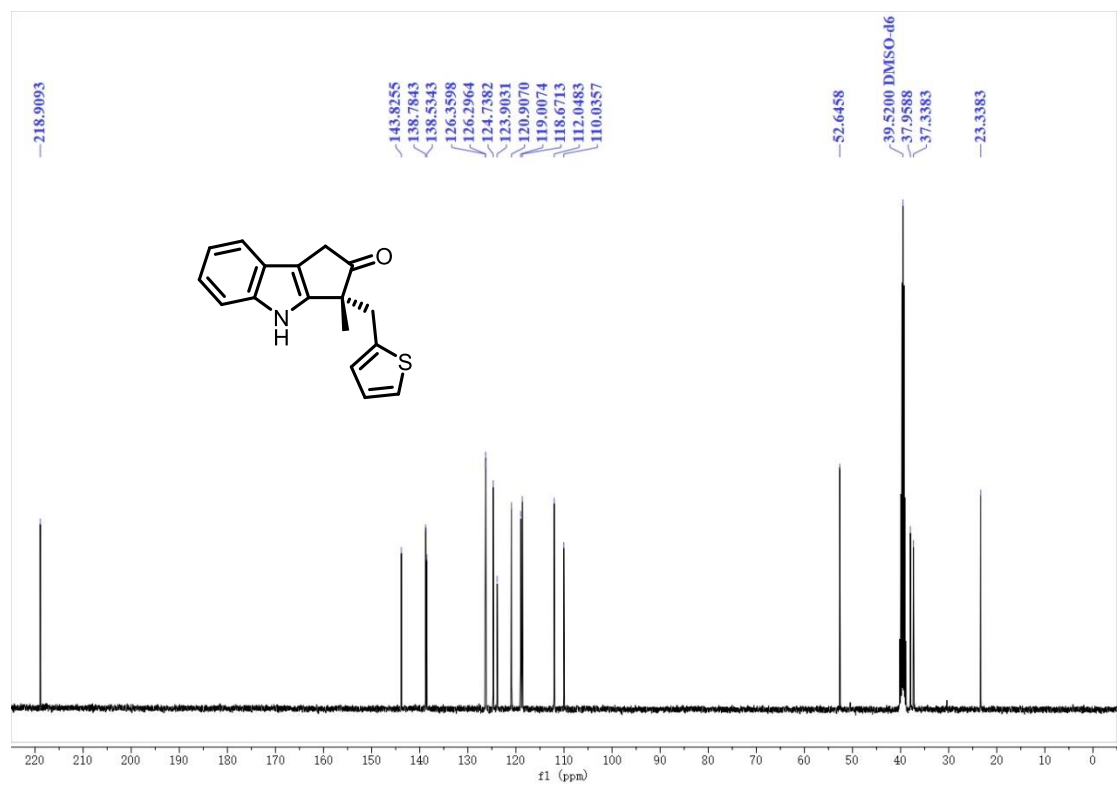

**30a**  $^1\text{H}$  NMR (400 MHz,  $\text{DMSO-}d_6$ )/ $^{13}\text{C}$  NMR (101 MHz,  $\text{DMSO-}d_6$ )

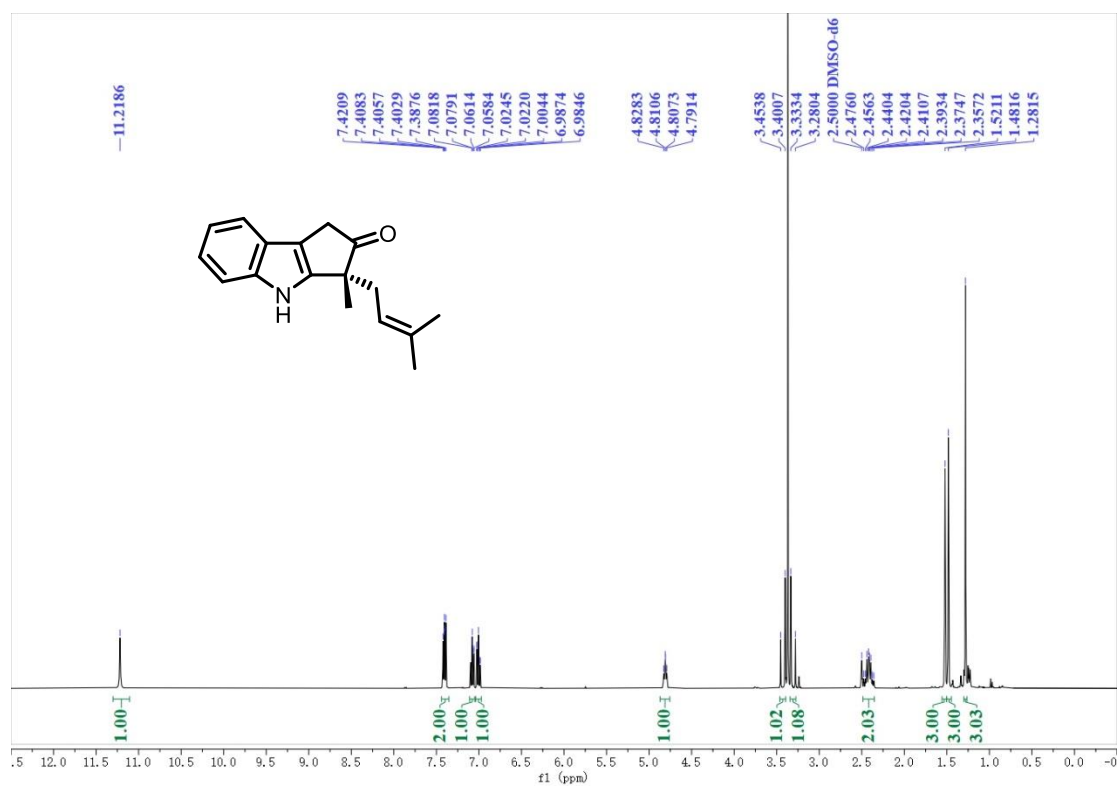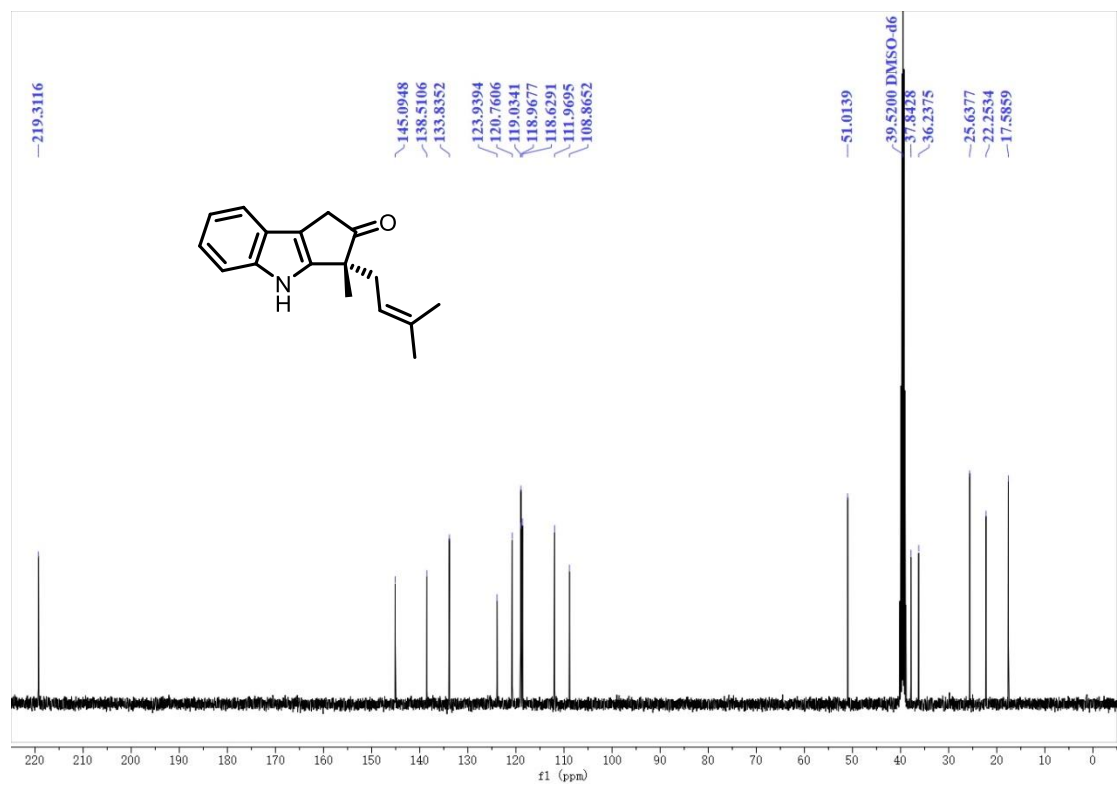

**3pa**  $^1\text{H}$  NMR (300 MHz,  $\text{DMSO-}d_6$ )/ $^{13}\text{C}$  NMR (75 MHz,  $\text{DMSO-}d_6$ )

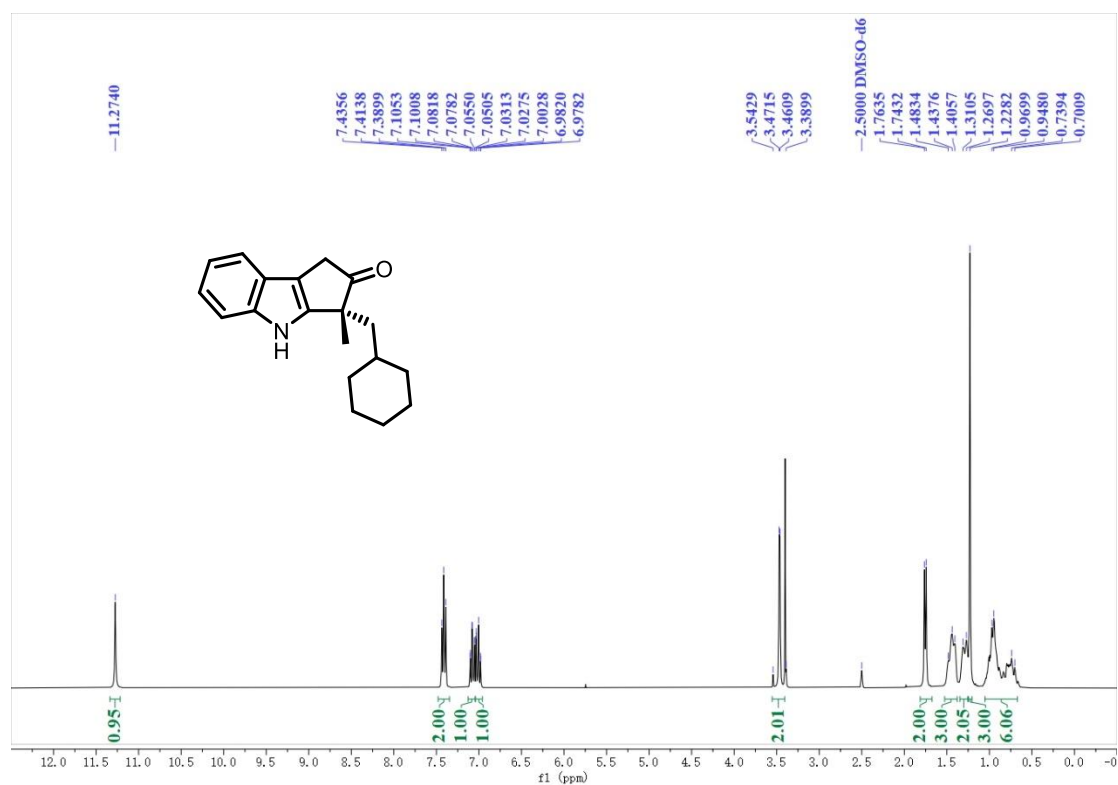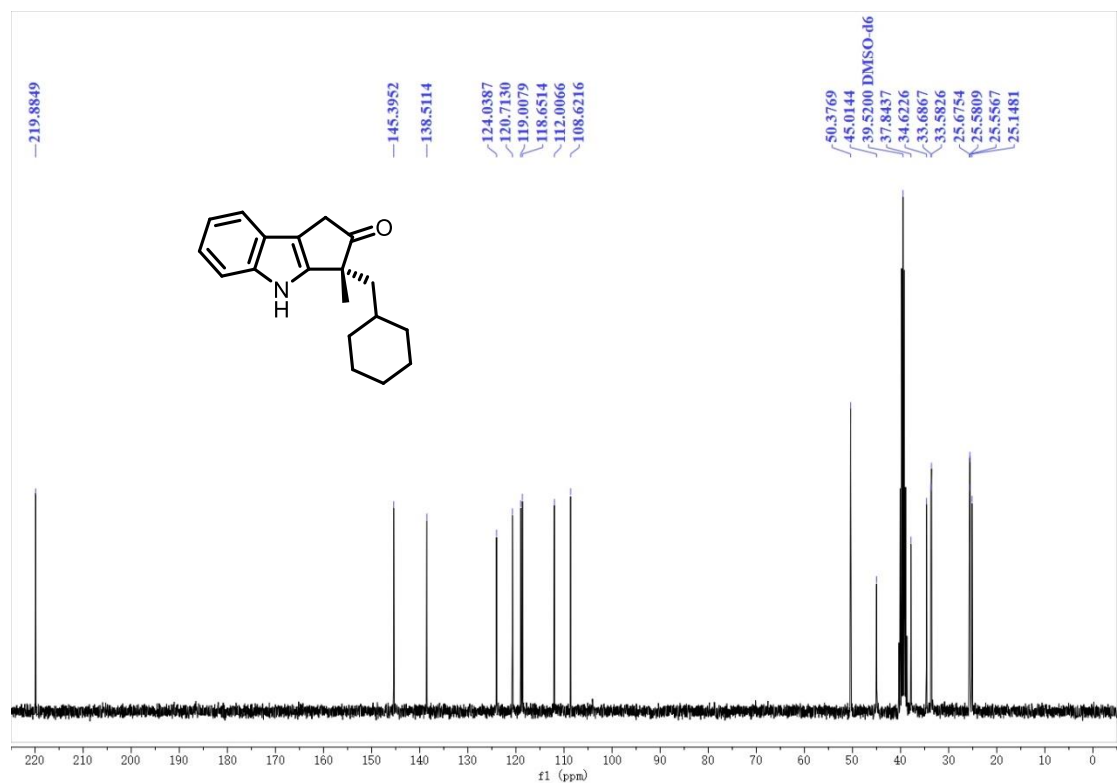

**3qa**  $^1\text{H}$  NMR (400 MHz,  $\text{DMSO-}d_6$ )/ $^{13}\text{C}$  NMR (101 MHz,  $\text{DMSO-}d_6$ )

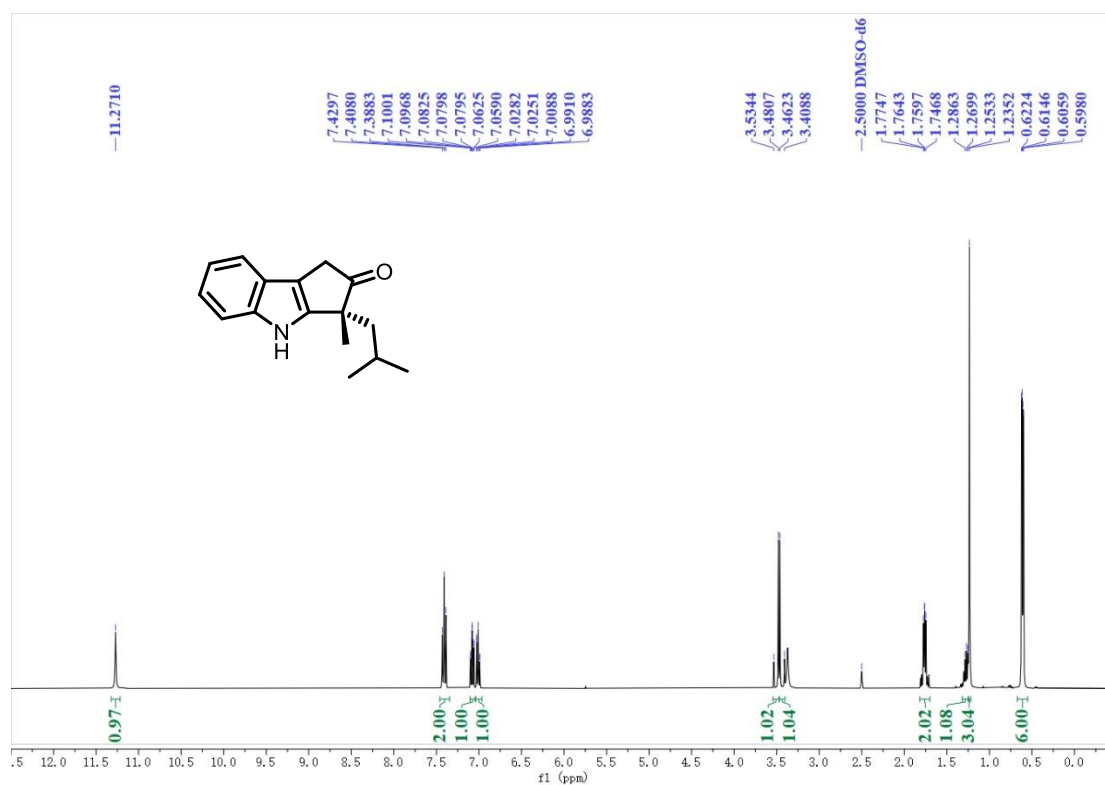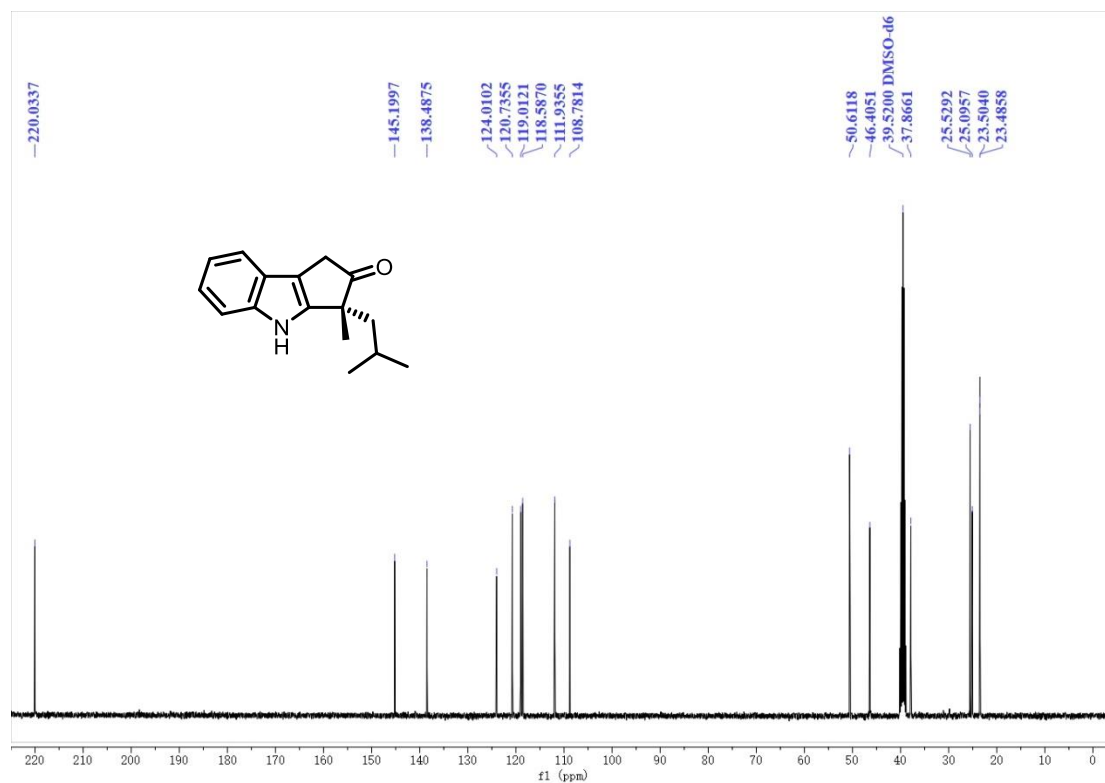

**3ra**  $^1\text{H}$  NMR (300 MHz,  $\text{DMSO-}d_6$ )/ $^{13}\text{C}$  NMR (75 MHz,  $\text{DMSO-}d_6$ )

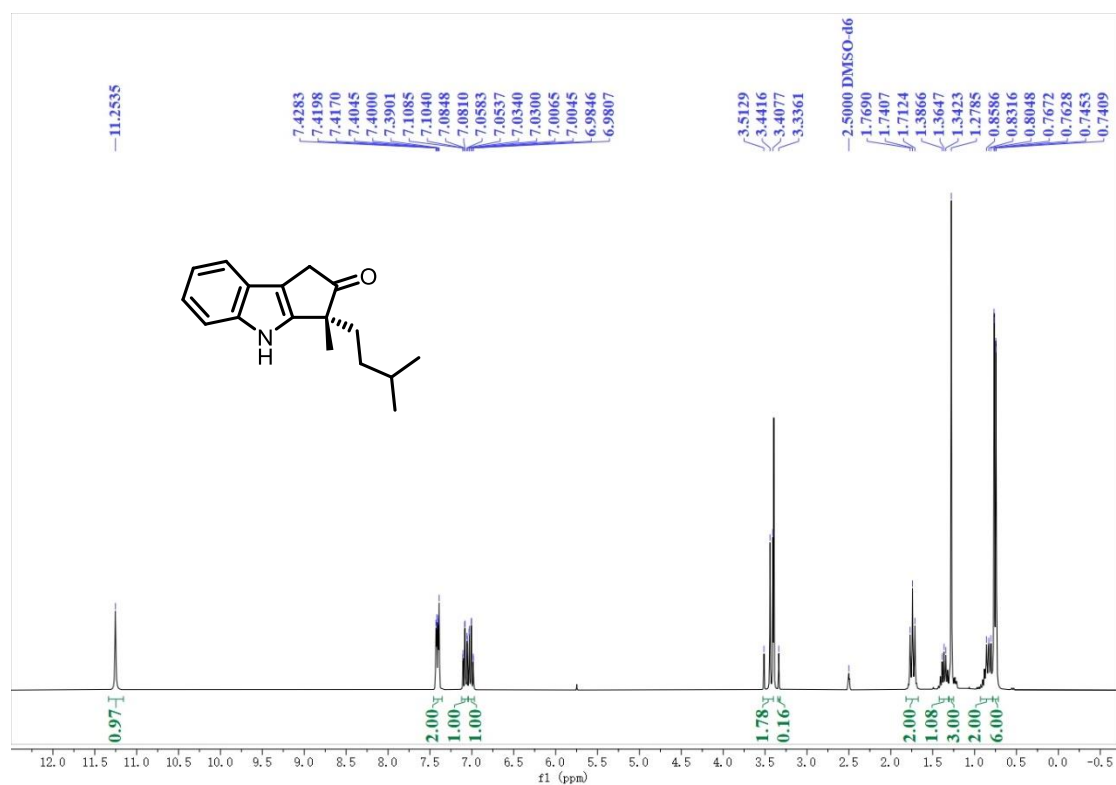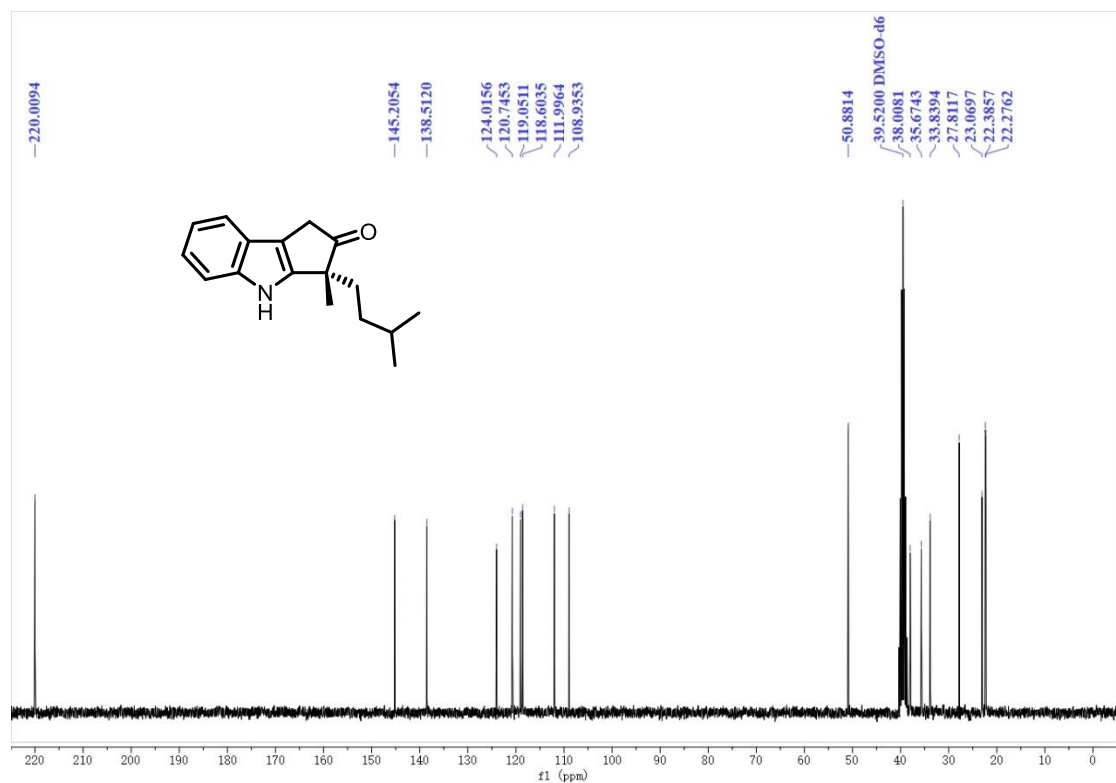

**3sa**  $^1\text{H}$  NMR (400 MHz,  $\text{DMSO-}d_6$ )/ $^{13}\text{C}$  NMR (101 MHz,  $\text{DMSO-}d_6$ )

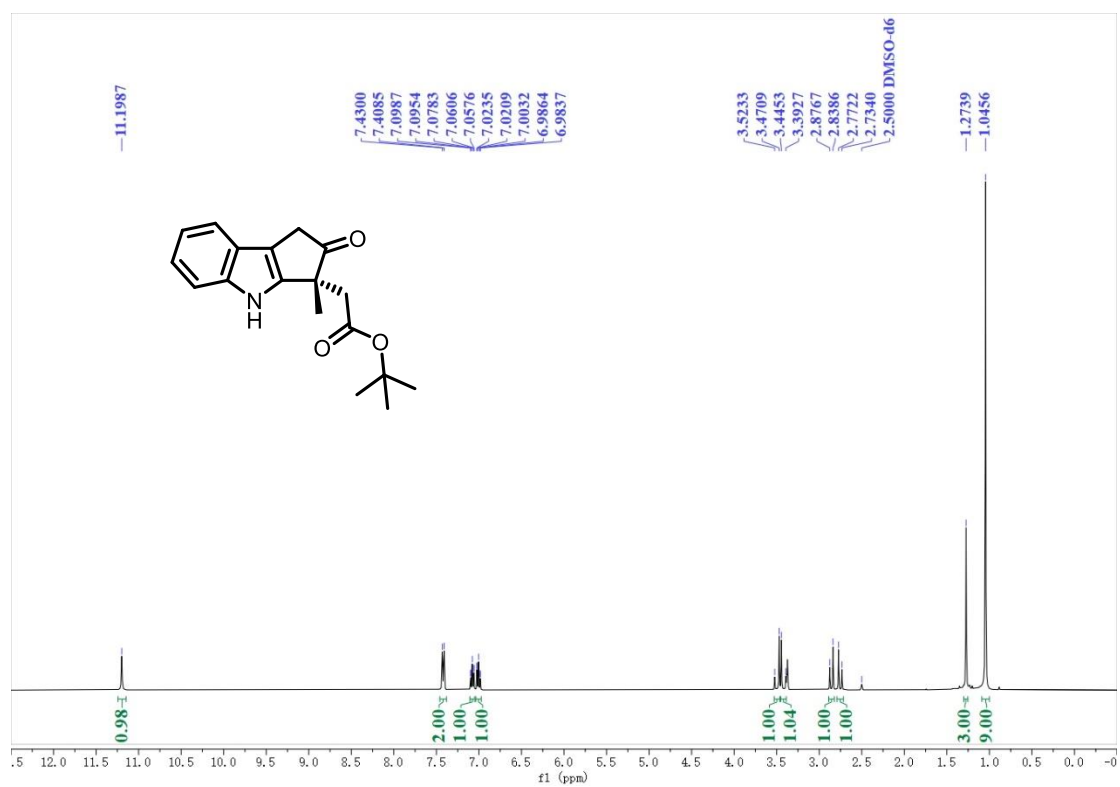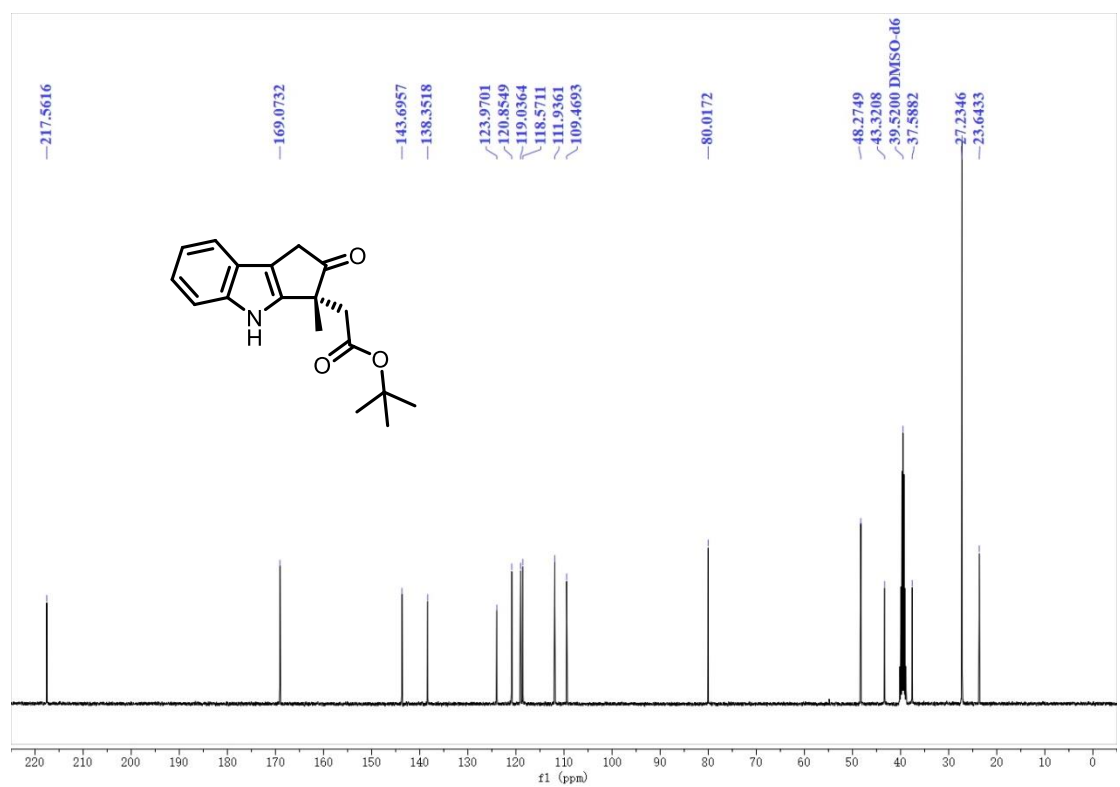

**3ta**  $^1\text{H}$  NMR (300 MHz,  $\text{DMSO-}d_6$ )/ $^{13}\text{C}$  NMR (75 MHz,  $\text{DMSO-}d_6$ )

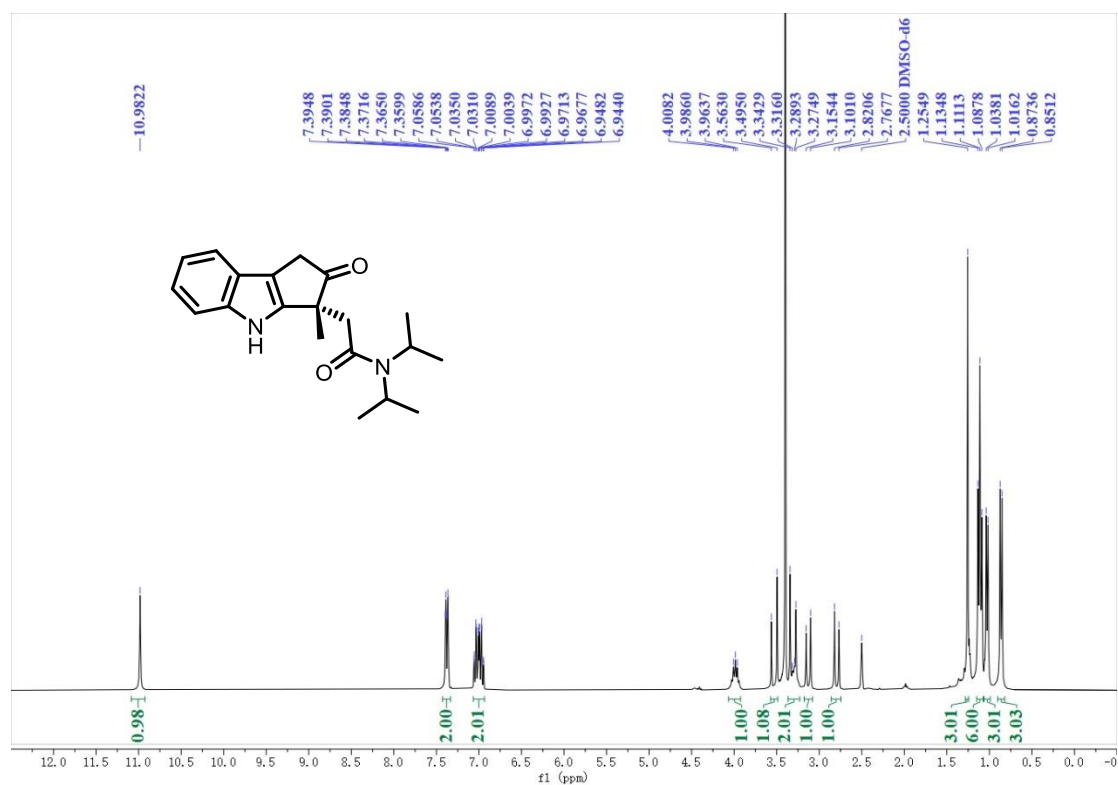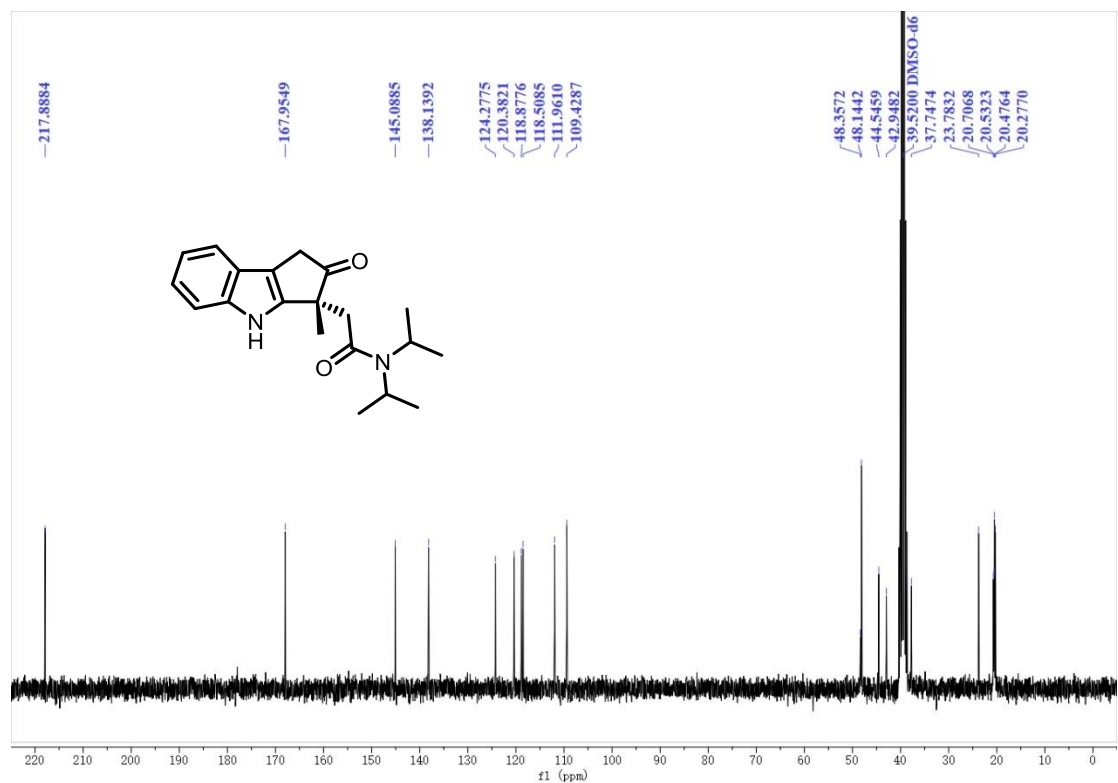

**3ua**  $^1\text{H}$  NMR (300 MHz,  $\text{DMSO-}d_6$ )/ $^{13}\text{C}$  NMR (101 MHz,  $\text{DMSO-}d_6$ )

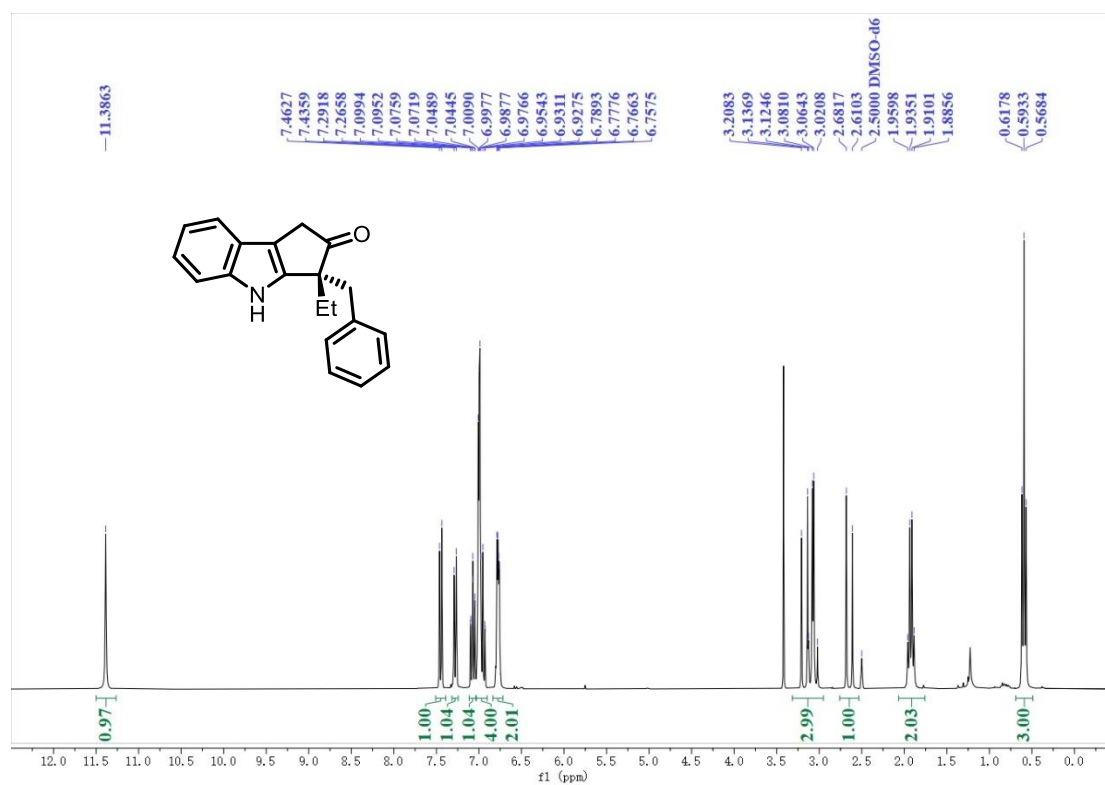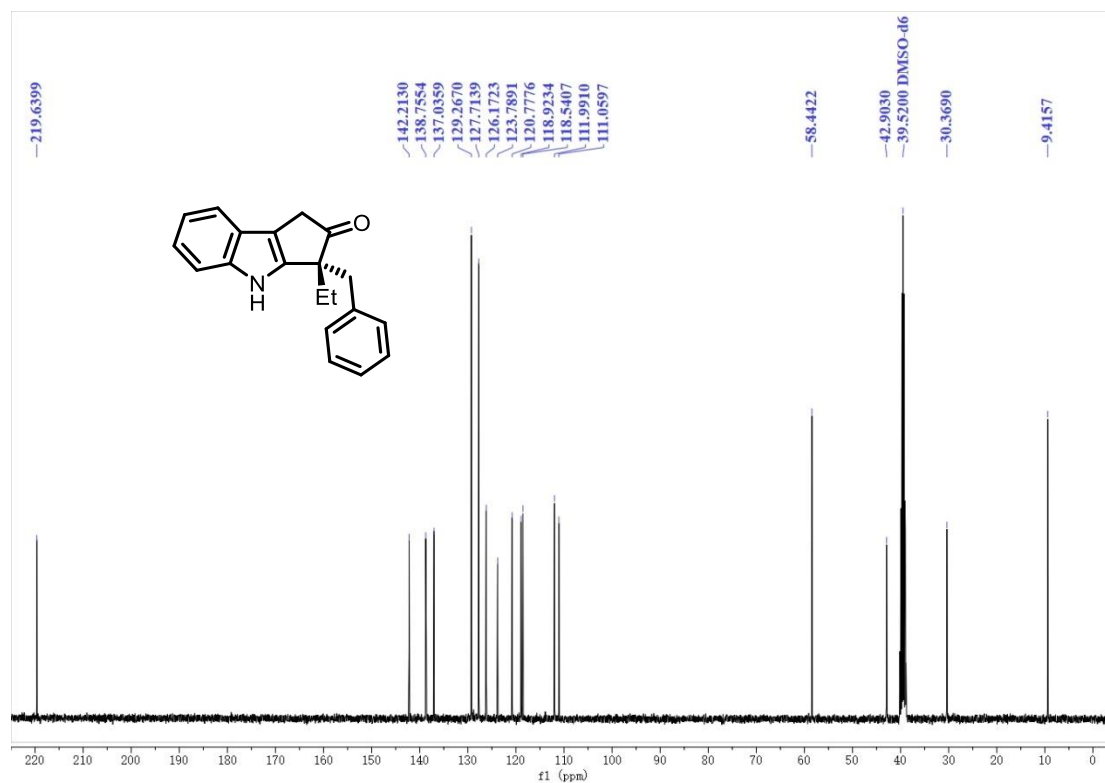



**3va**  $^1\text{H}$  NMR (400 MHz,  $\text{DMSO-}d_6$ )/ $^{13}\text{C}$  NMR (101 MHz,  $\text{DMSO-}d_6$ )

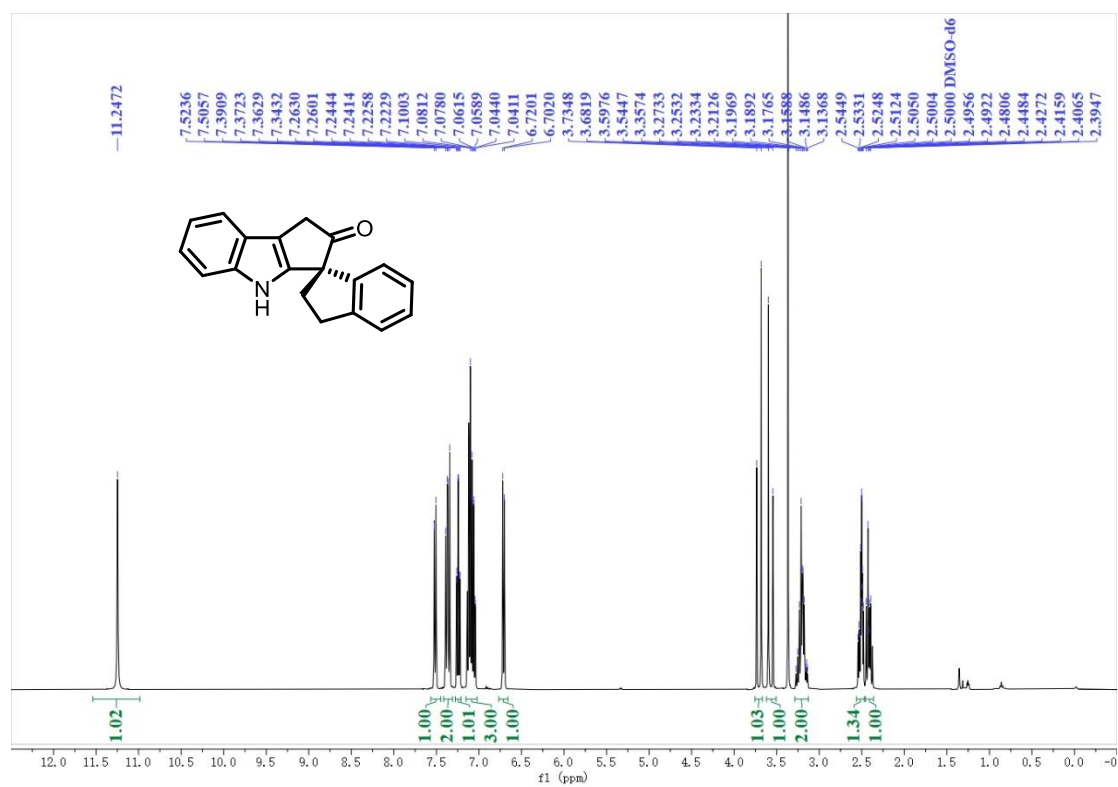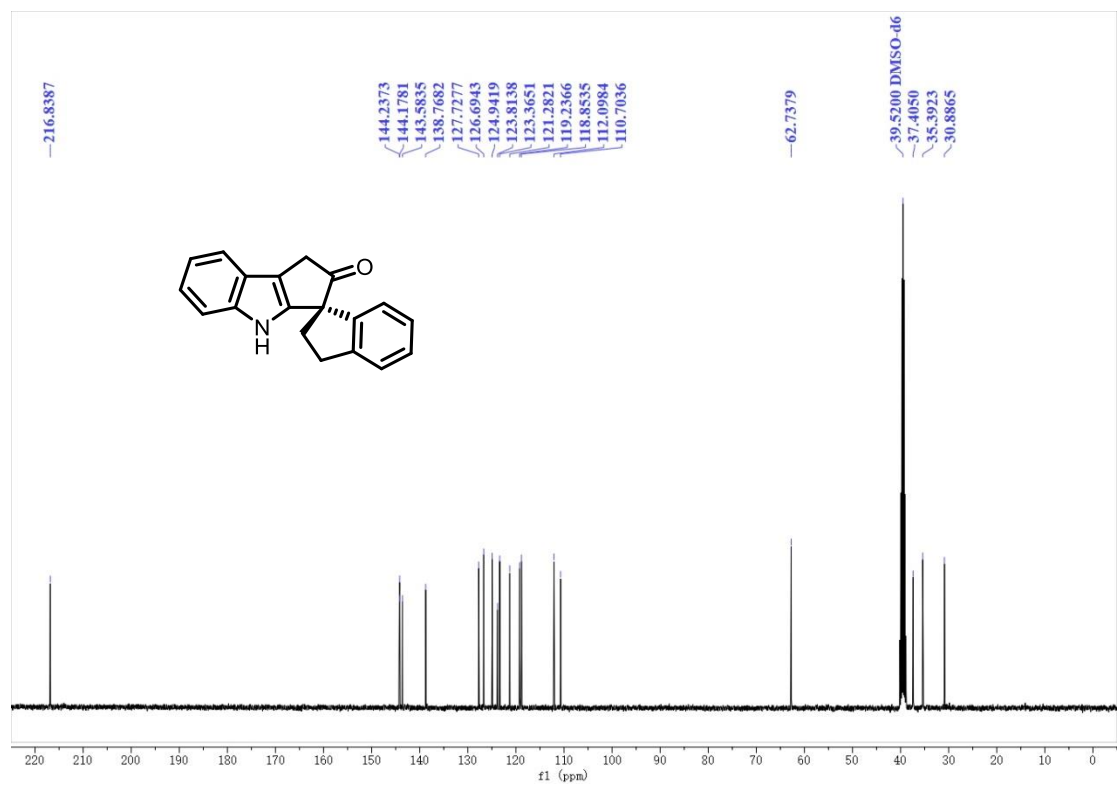

**3wa**  $^1\text{H}$  NMR (400 MHz,  $\text{DMSO-}d_6$ )/ $^{13}\text{C}$  NMR (101 MHz,  $\text{DMSO-}d_6$ )

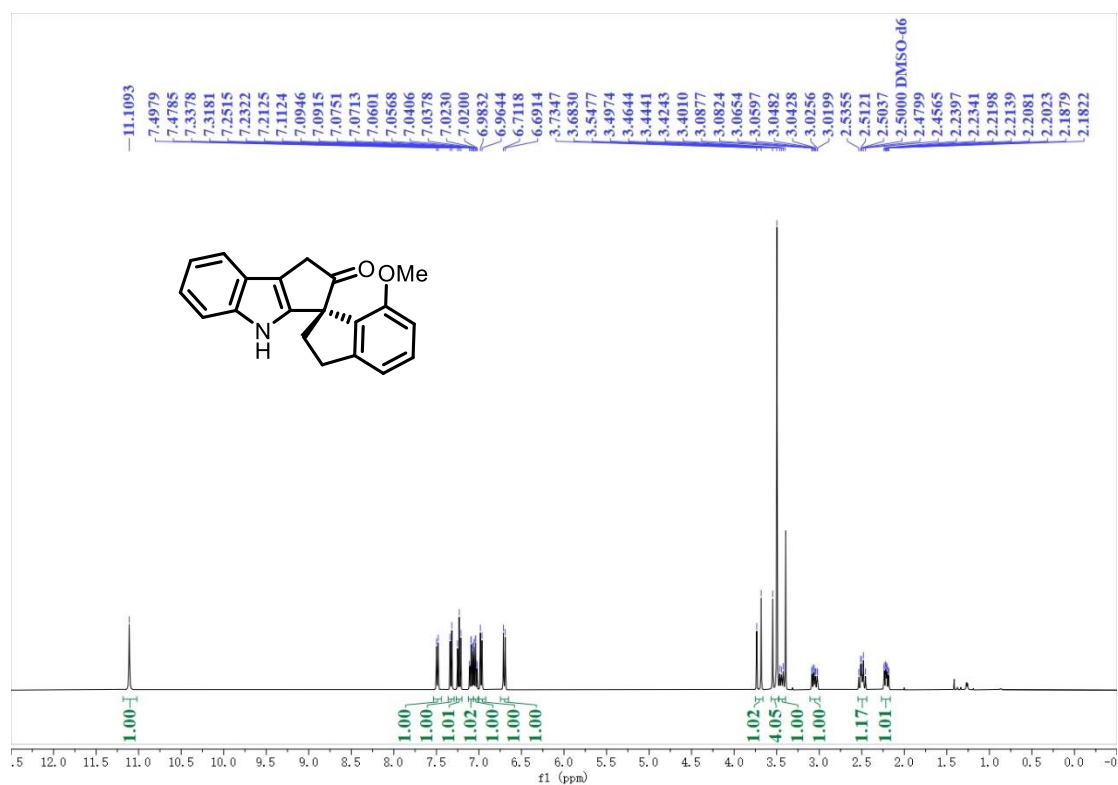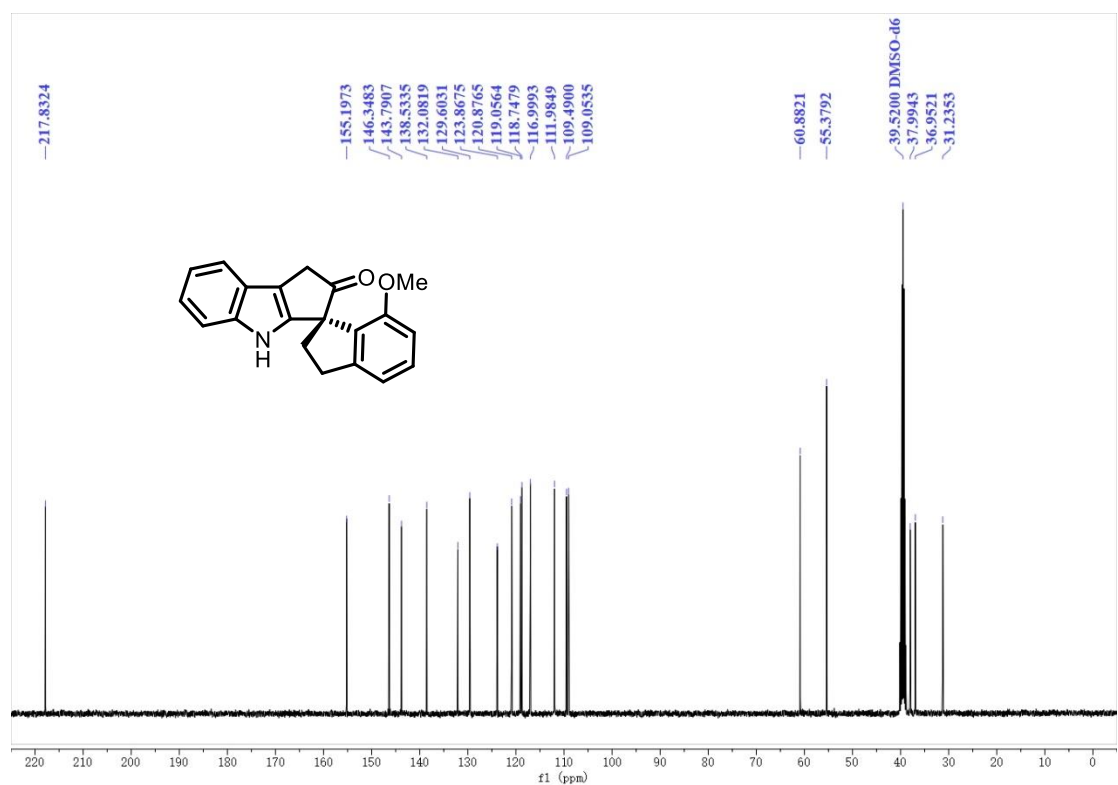

**3ab**  $^1\text{H}$  NMR (400 MHz,  $\text{DMSO-}d_6$ )/ $^{13}\text{C}$  NMR (101 MHz,  $\text{DMSO-}d_6$ )

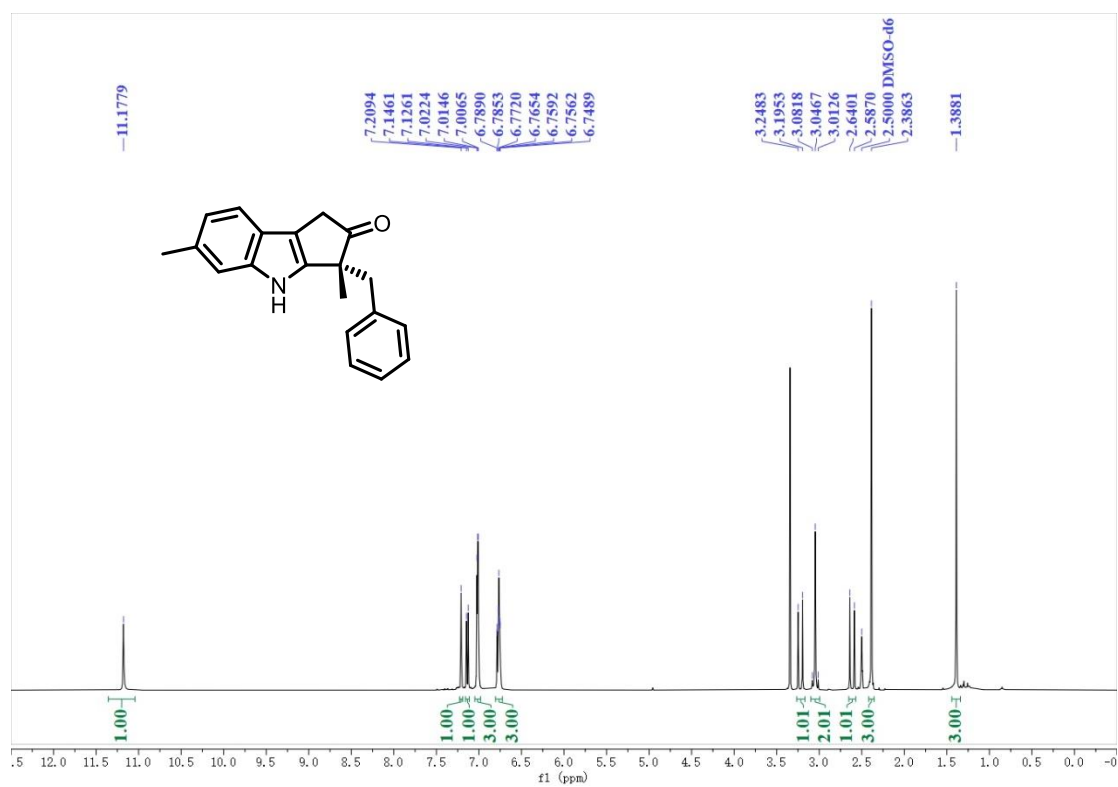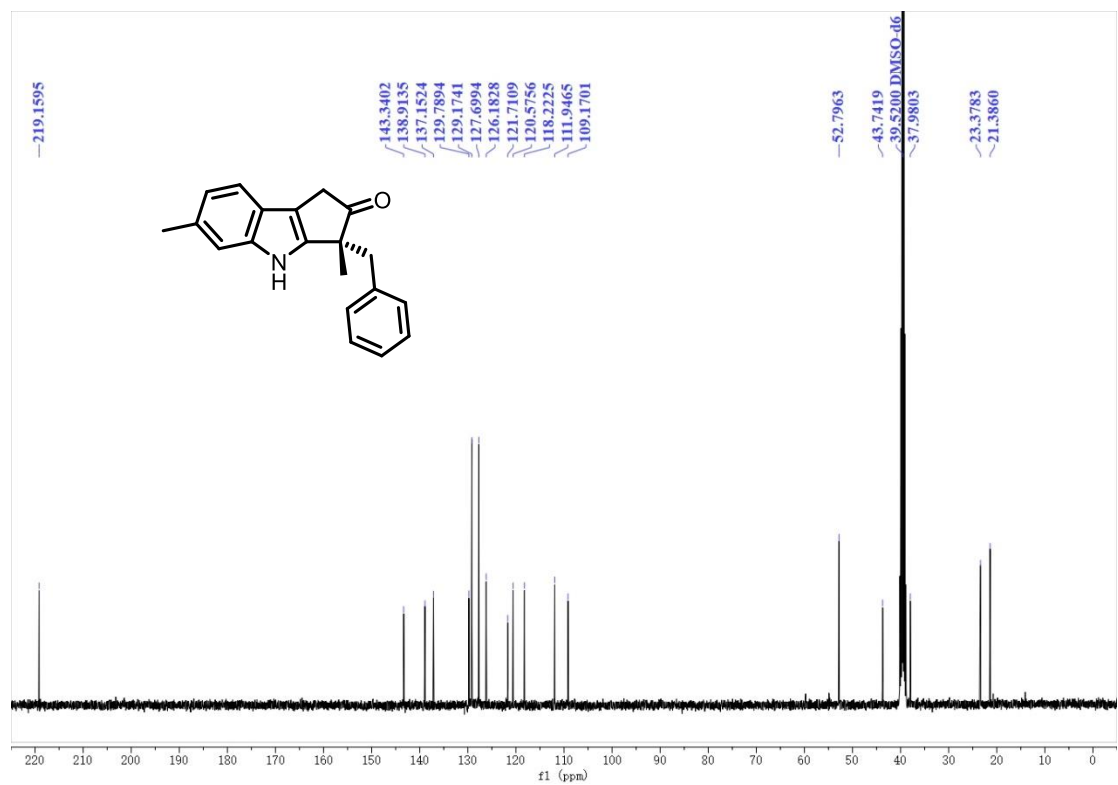

**3ac**  $^1\text{H}$  NMR (400 MHz,  $\text{DMSO-}d_6$ )/ $^{13}\text{C}$  NMR (101 MHz,  $\text{DMSO-}d_6$ )

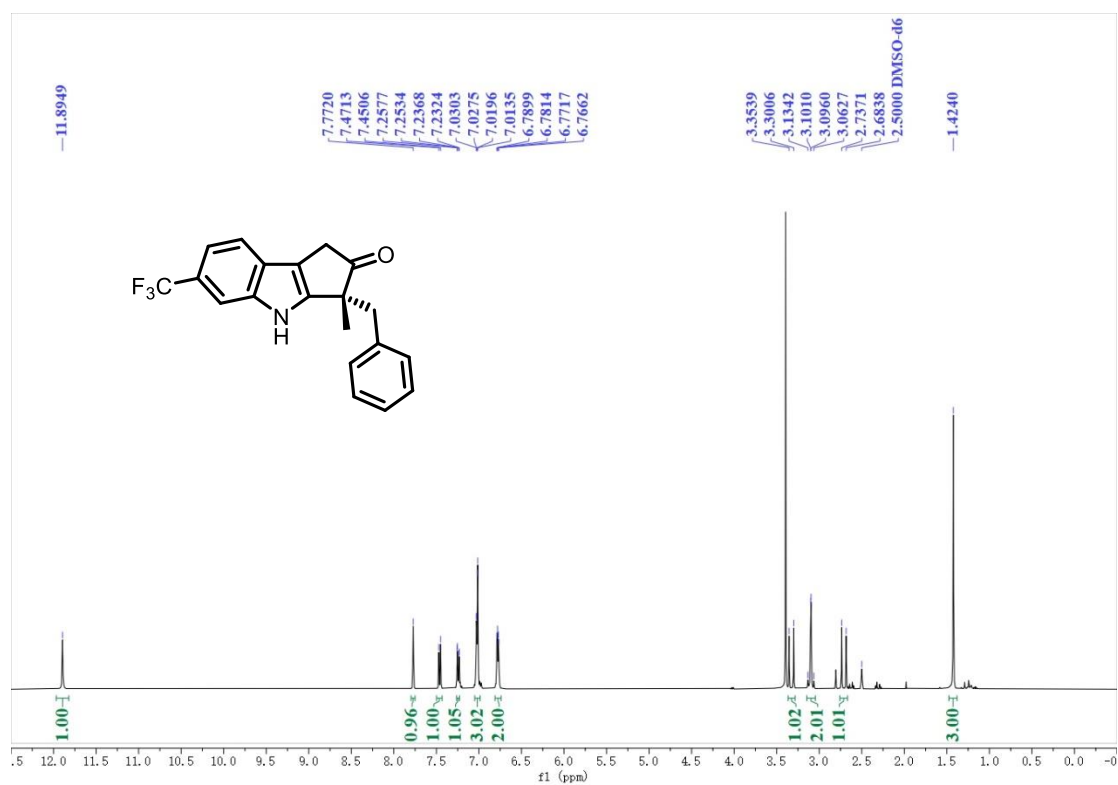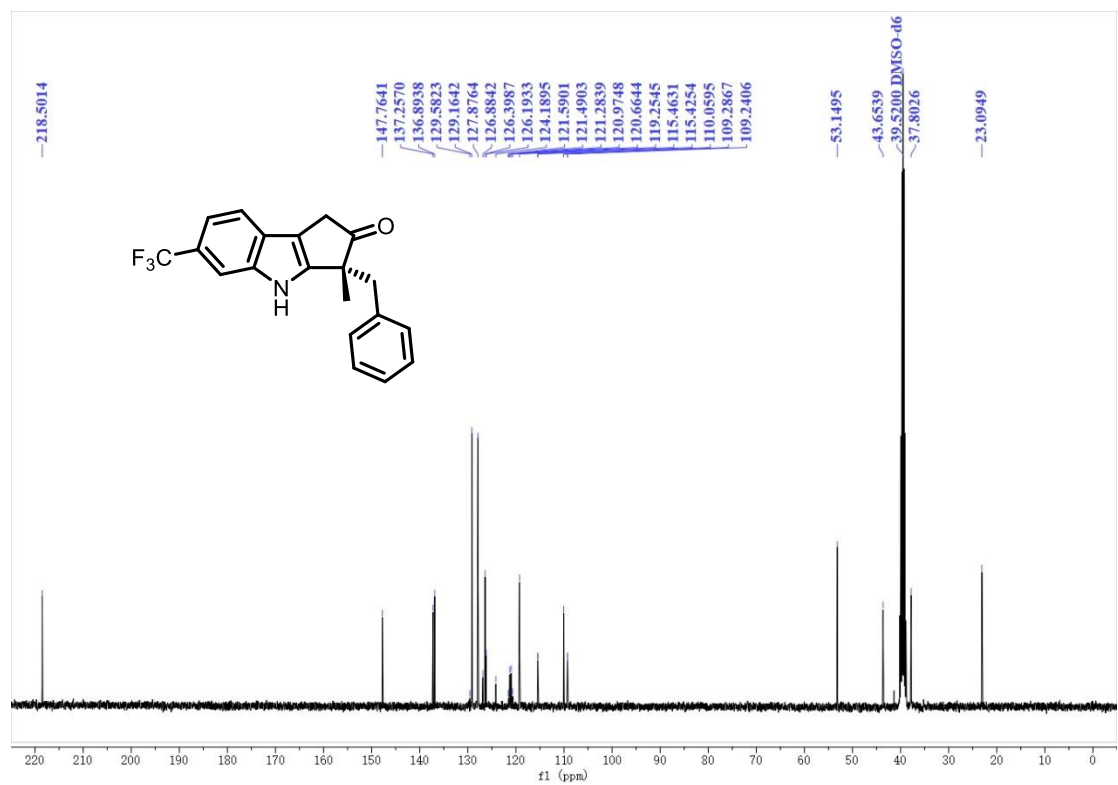

**3ad**  $^1\text{H}$  NMR (400 MHz,  $\text{DMSO-}d_6$ )/ $^{13}\text{C}$  NMR (101 MHz,  $\text{DMSO-}d_6$ )

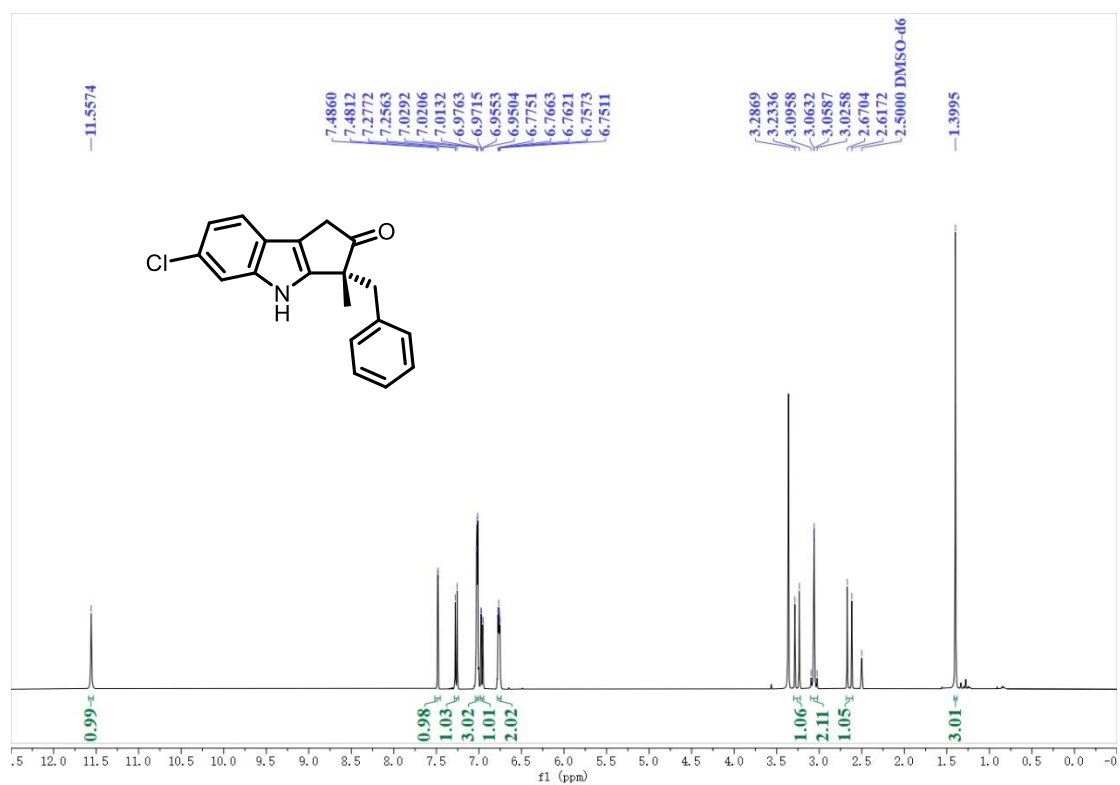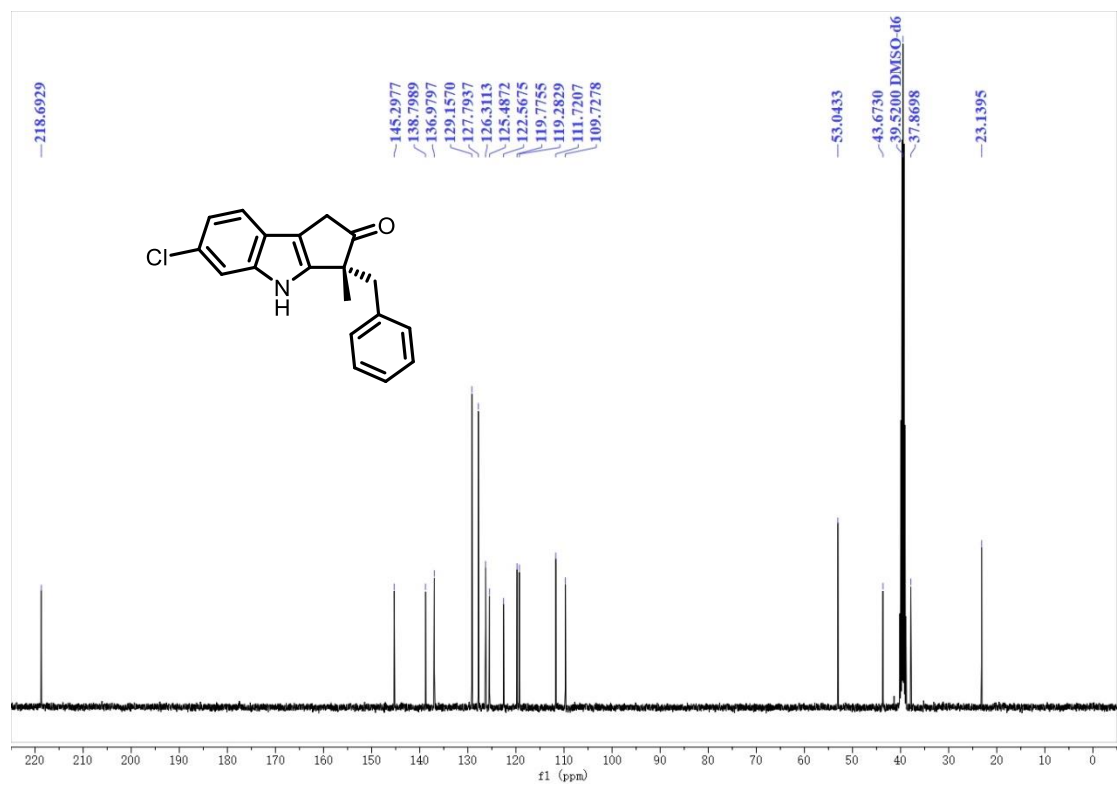

**3ae**  $^1\text{H}$  NMR (400 MHz,  $\text{DMSO-}d_6$ )  $^{13}\text{C}$  NMR (101 MHz,  $\text{DMSO-}d_6$ )

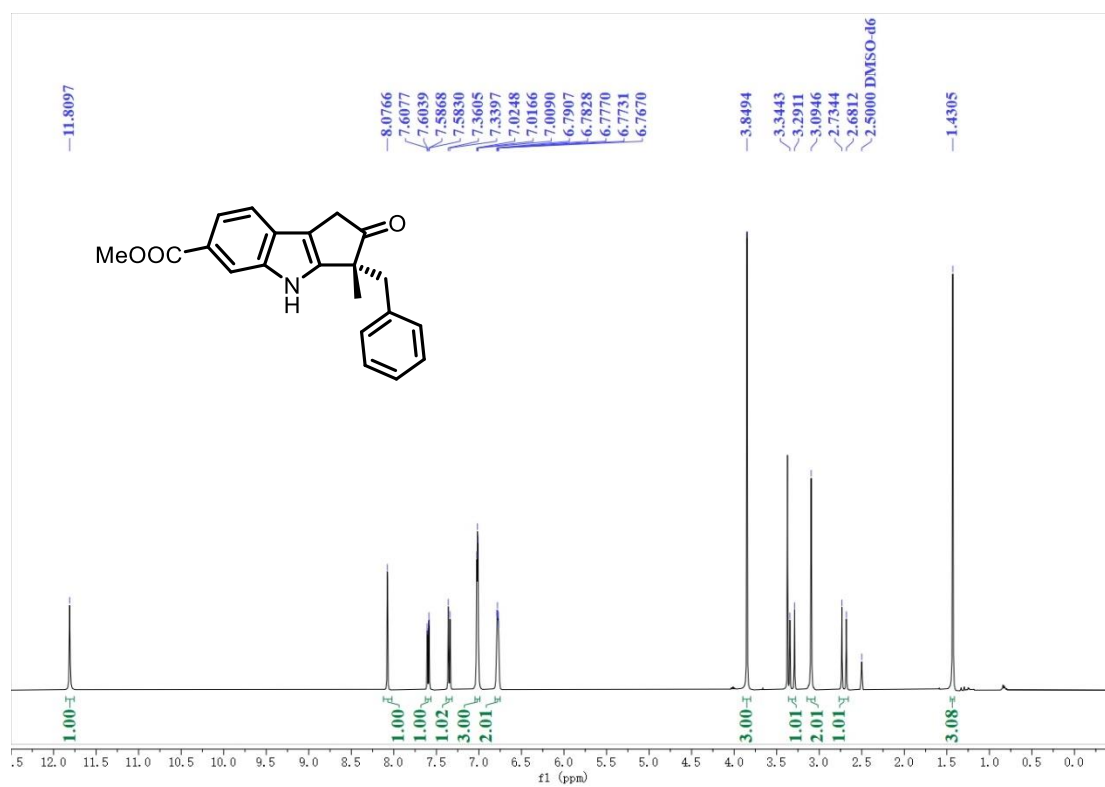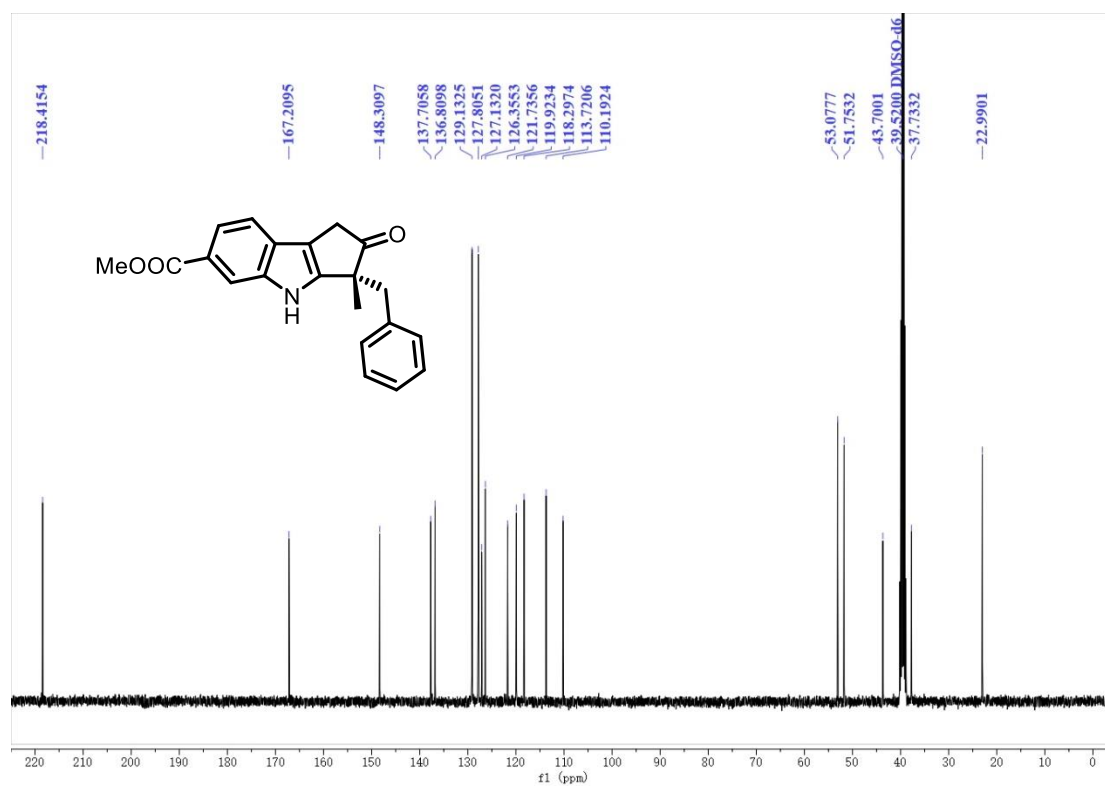

**3af**  $^1\text{H}$  NMR (300 MHz,  $\text{DMSO-}d_6$ )/ $^{13}\text{C}$  NMR (75 MHz,  $\text{DMSO-}d_6$ )

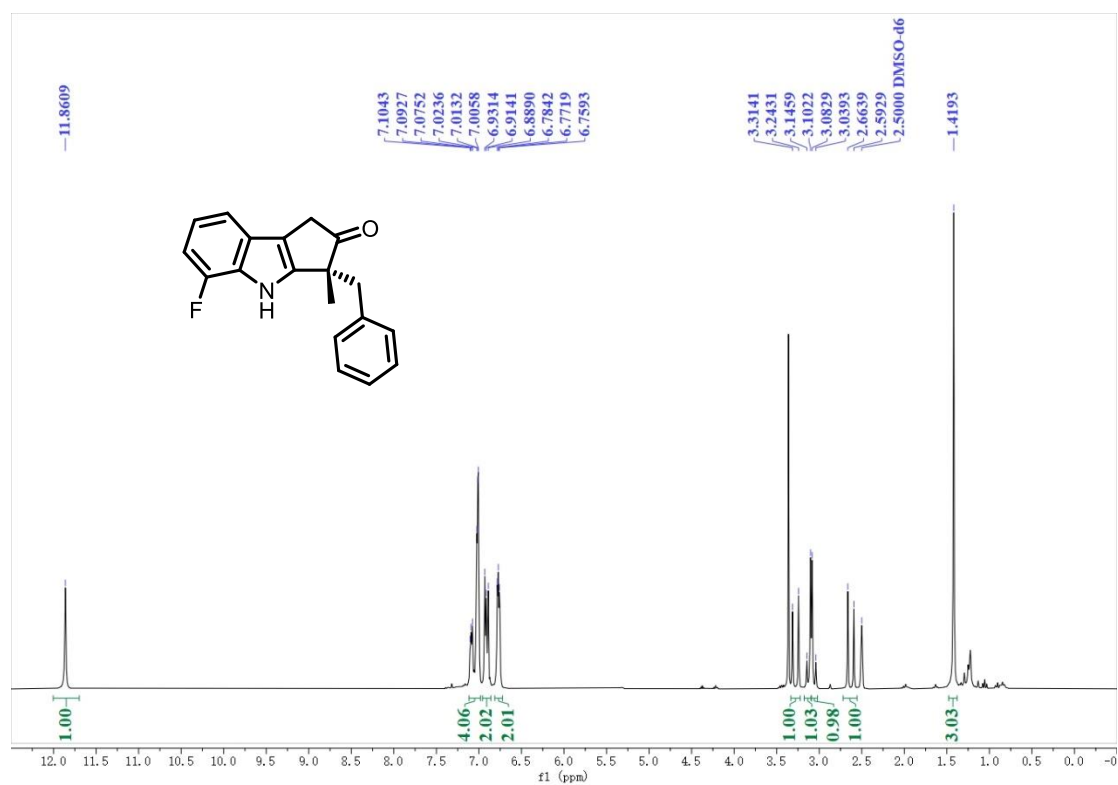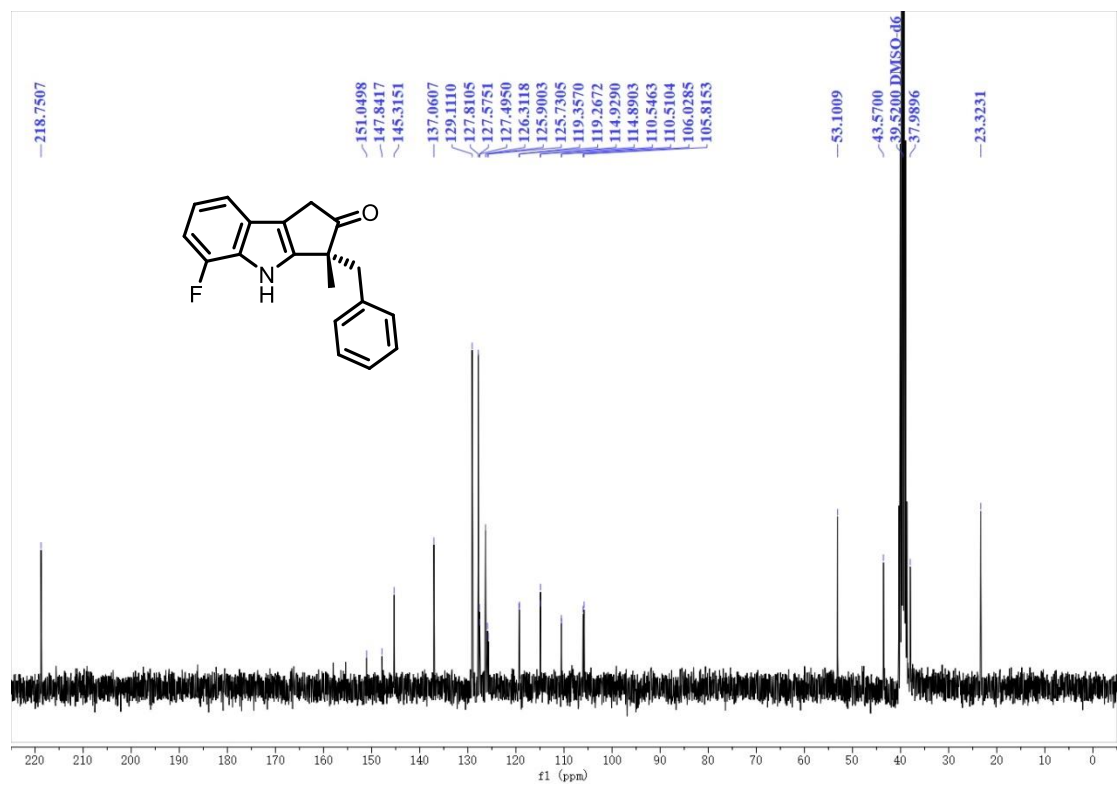

**3ag**  $^1\text{H}$  NMR (400 MHz,  $\text{DMSO-}d_6$ )/ $^{13}\text{C}$  NMR (101 MHz,  $\text{DMSO-}d_6$ )

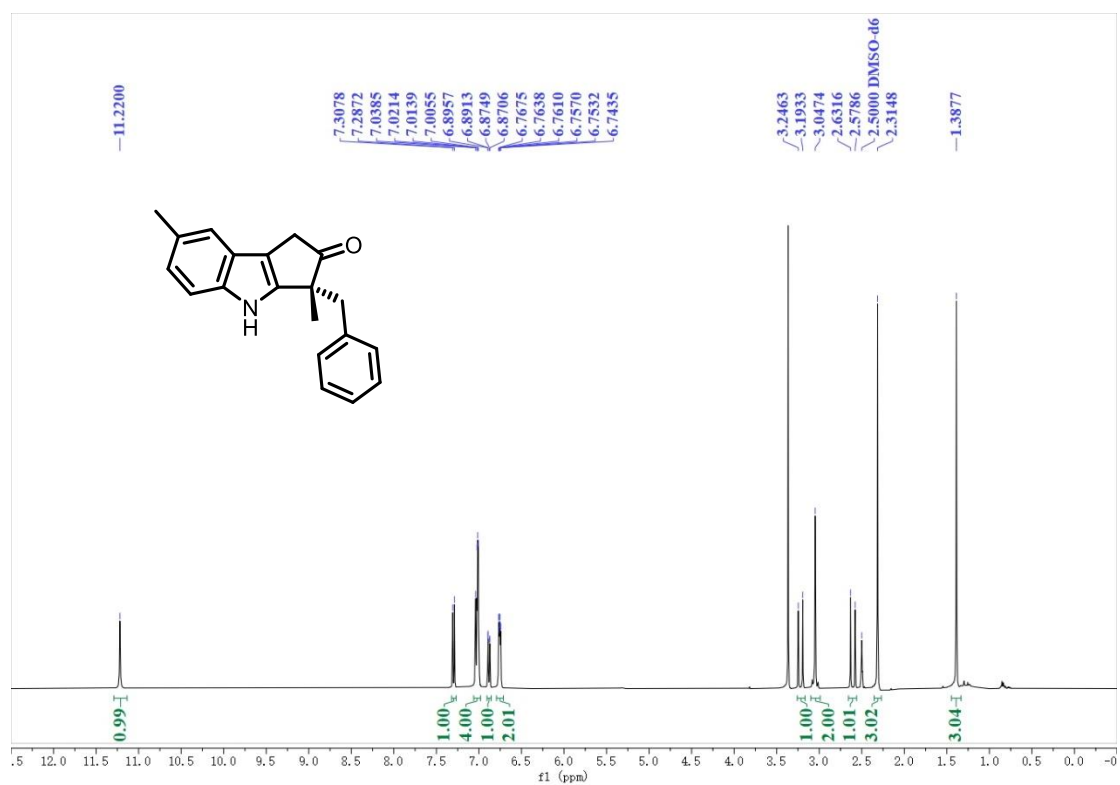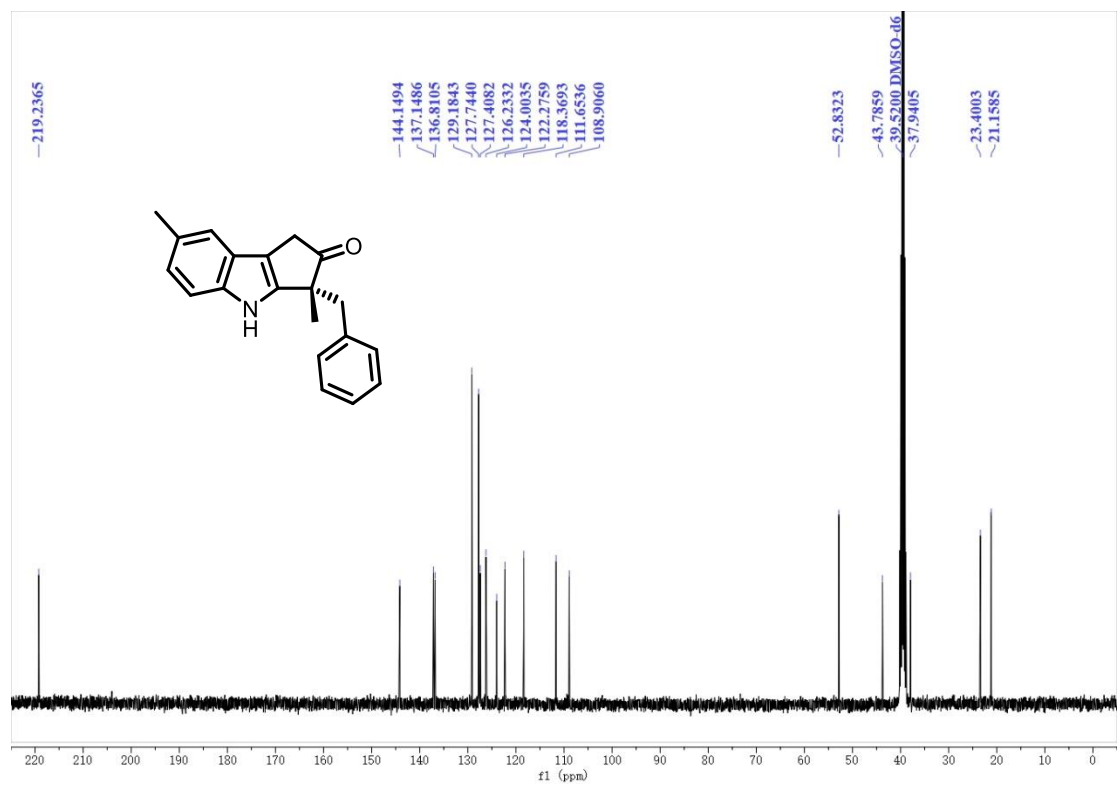



**3ah**  $^1\text{H}$  NMR (400 MHz,  $\text{DMSO-}d_6$ )/ $^{13}\text{C}$  NMR (101 MHz,  $\text{DMSO-}d_6$ )

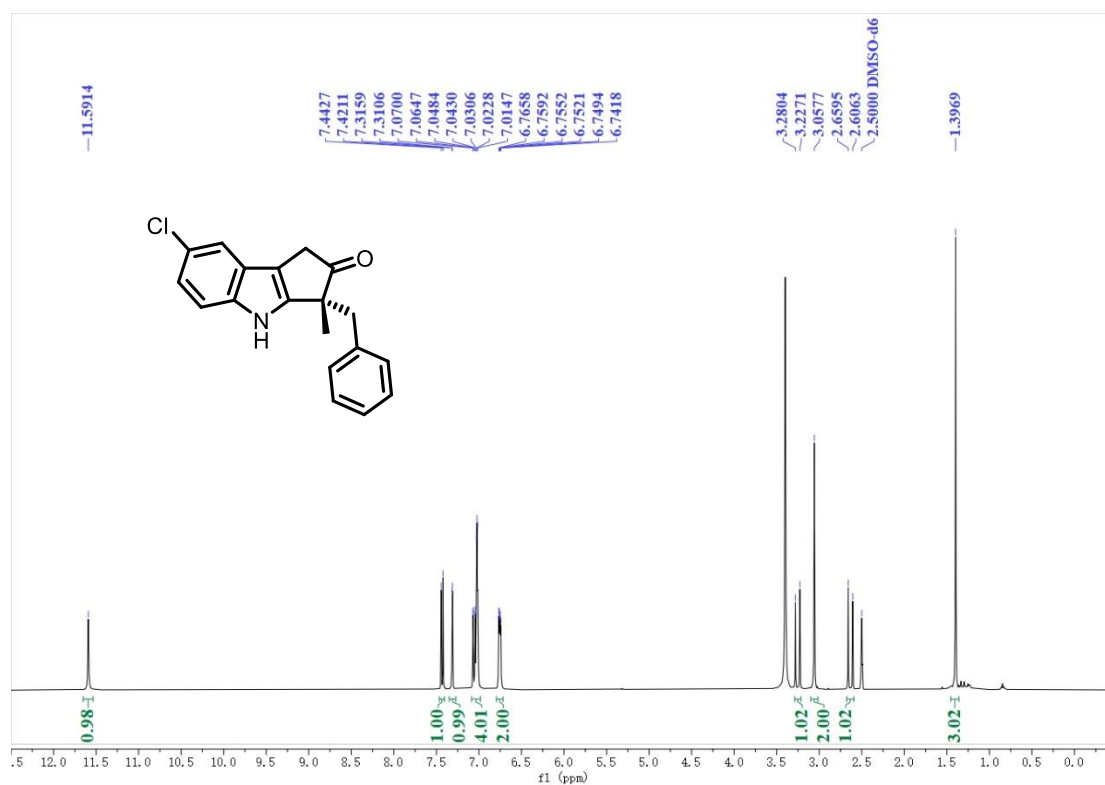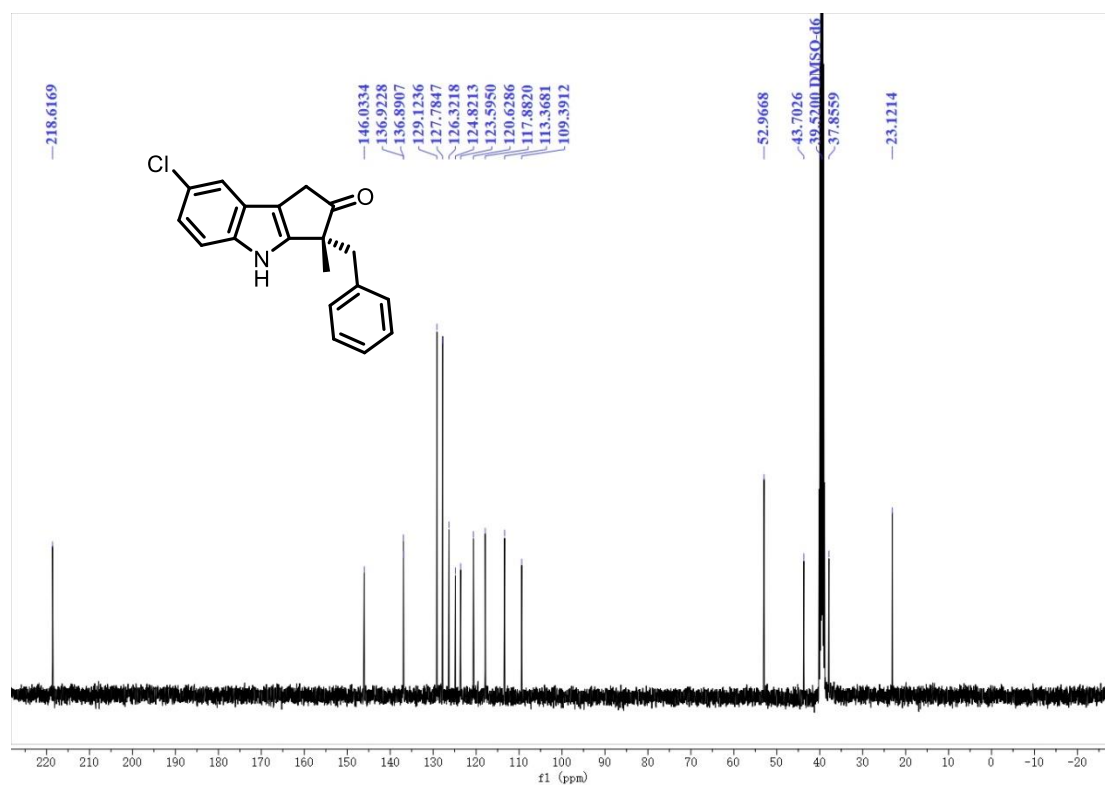

**3ai**  $^1\text{H}$  NMR (400 MHz,  $\text{DMSO-}d_6$ )/ $^{13}\text{C}$  NMR (101 MHz,  $\text{DMSO-}d_6$ )

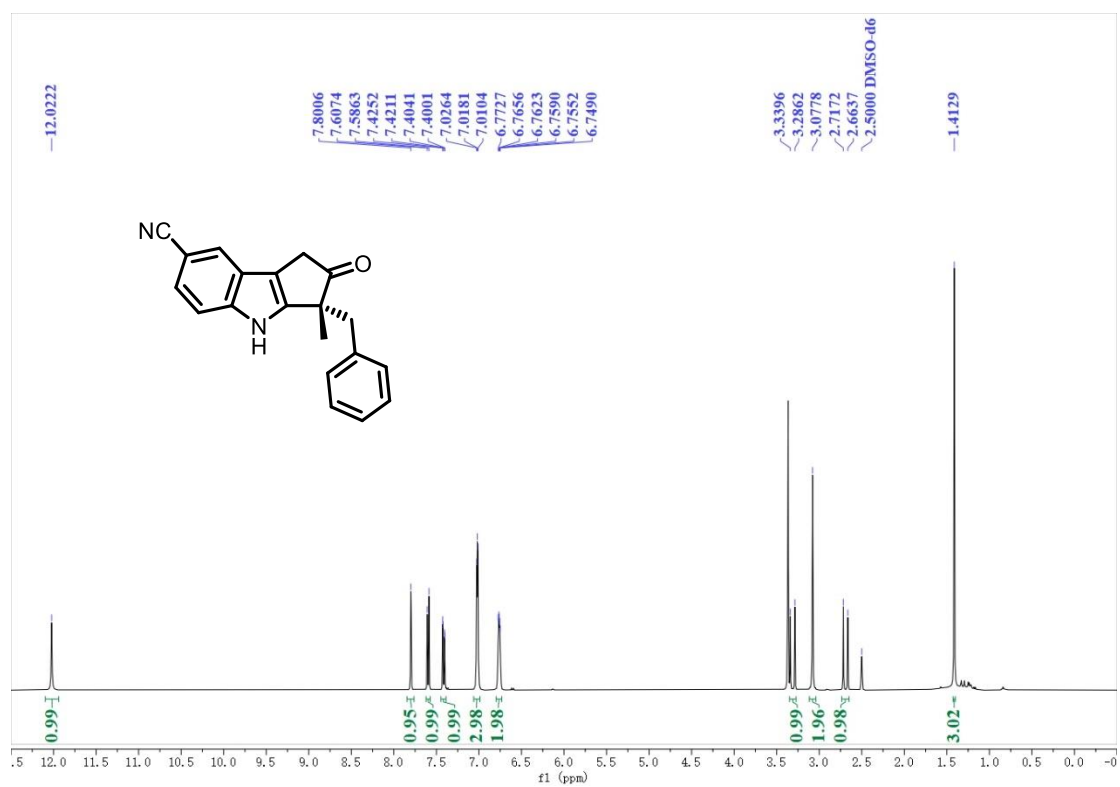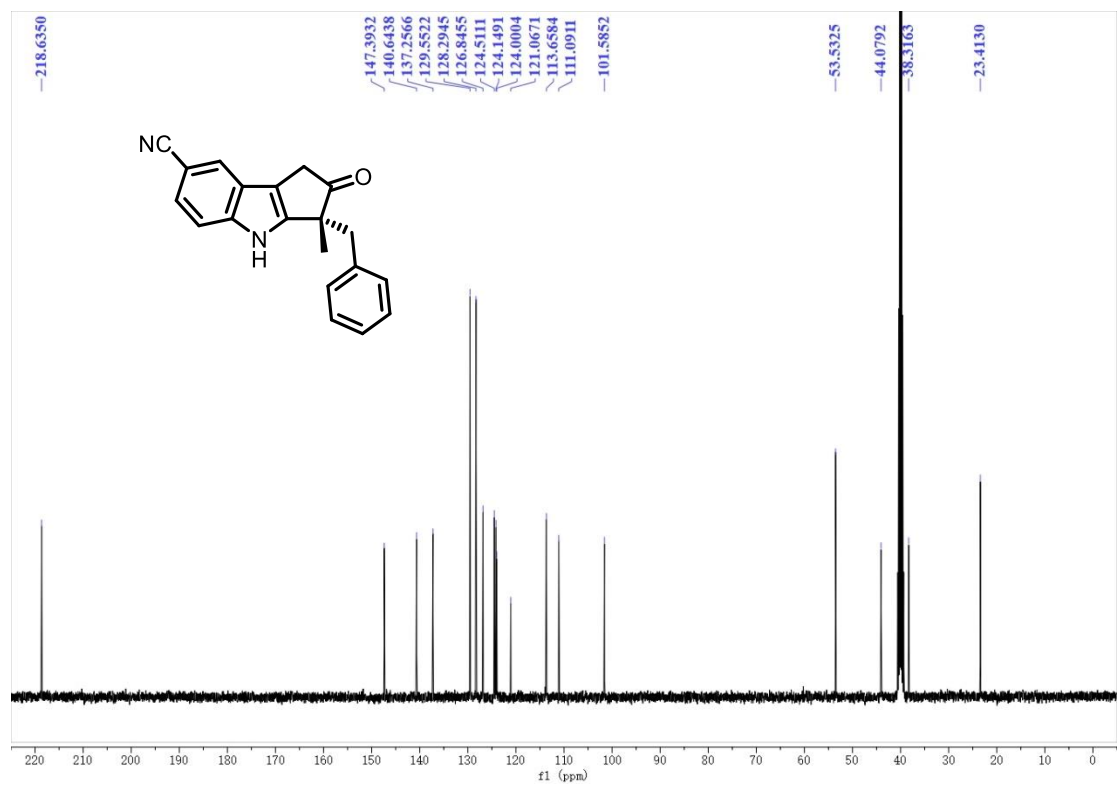

**3aa'**  $^1\text{H}$  NMR (400 MHz,  $\text{DMSO-}d_6$ )/ $^{13}\text{C}$  NMR (101 MHz,  $\text{DMSO-}d_6$ )

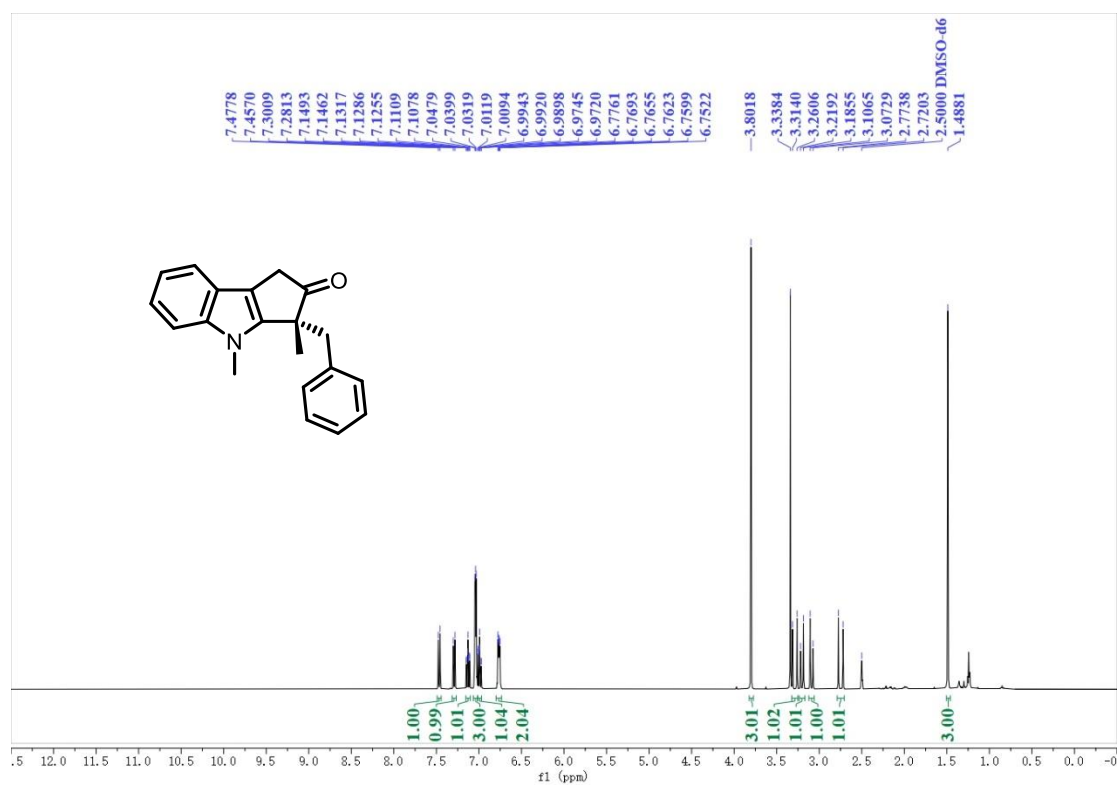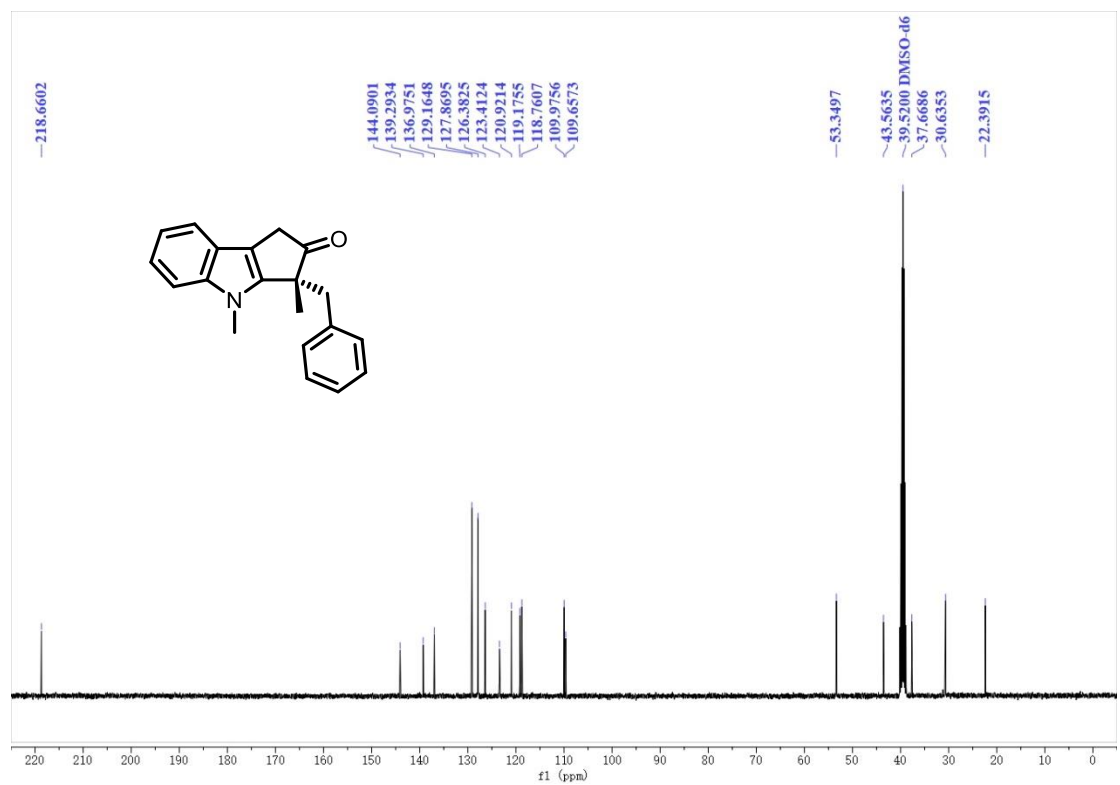

**3ac**  $^{19}\text{F}$  NMR (282 MHz,  $\text{DMSO-}d_6$ )

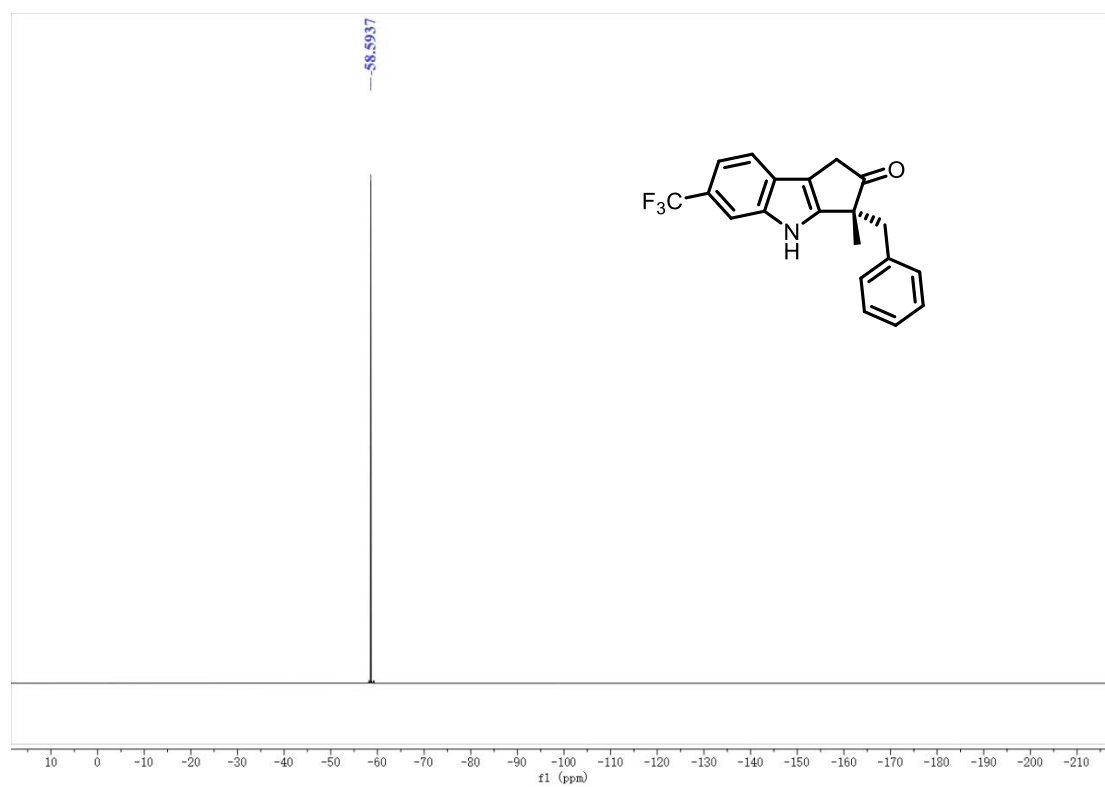

**3af**  $^{19}\text{F}$  NMR (282 MHz,  $\text{DMSO-}d_6$ )

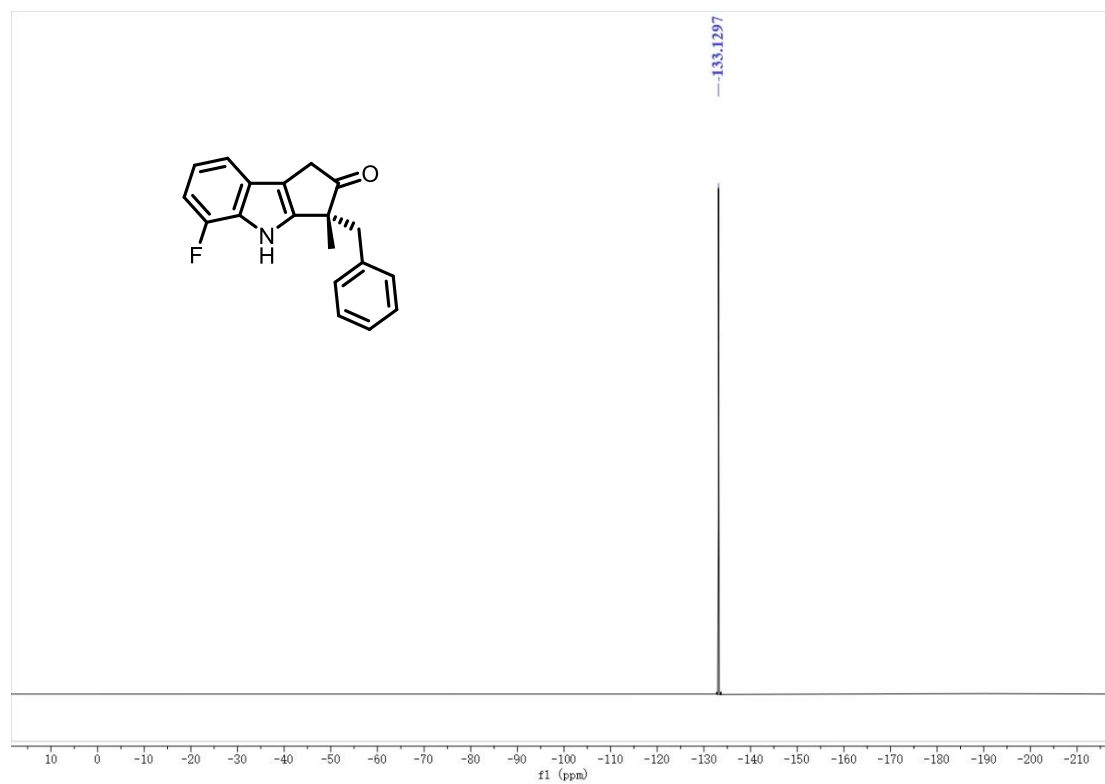

4  $^1\text{H}$  NMR (300 MHz,  $\text{DMSO-}d_6$ )/ $^{13}\text{C}$  NMR (75 MHz,  $\text{DMSO-}d_6$ )

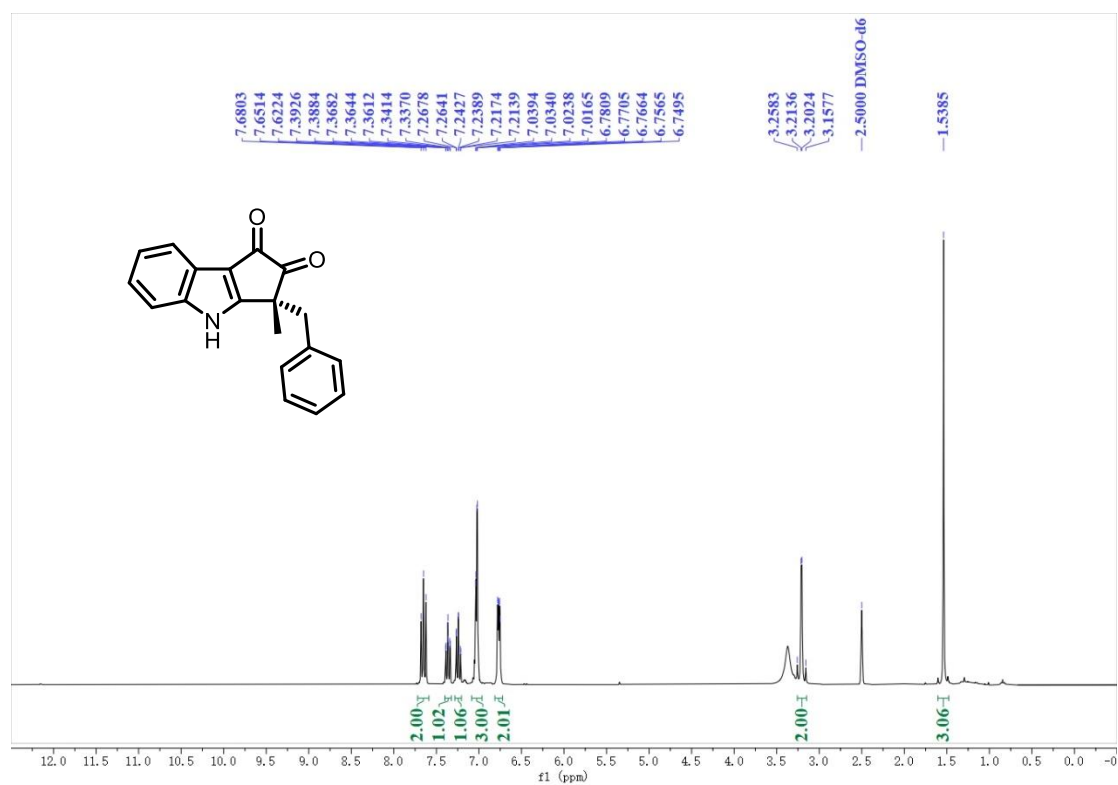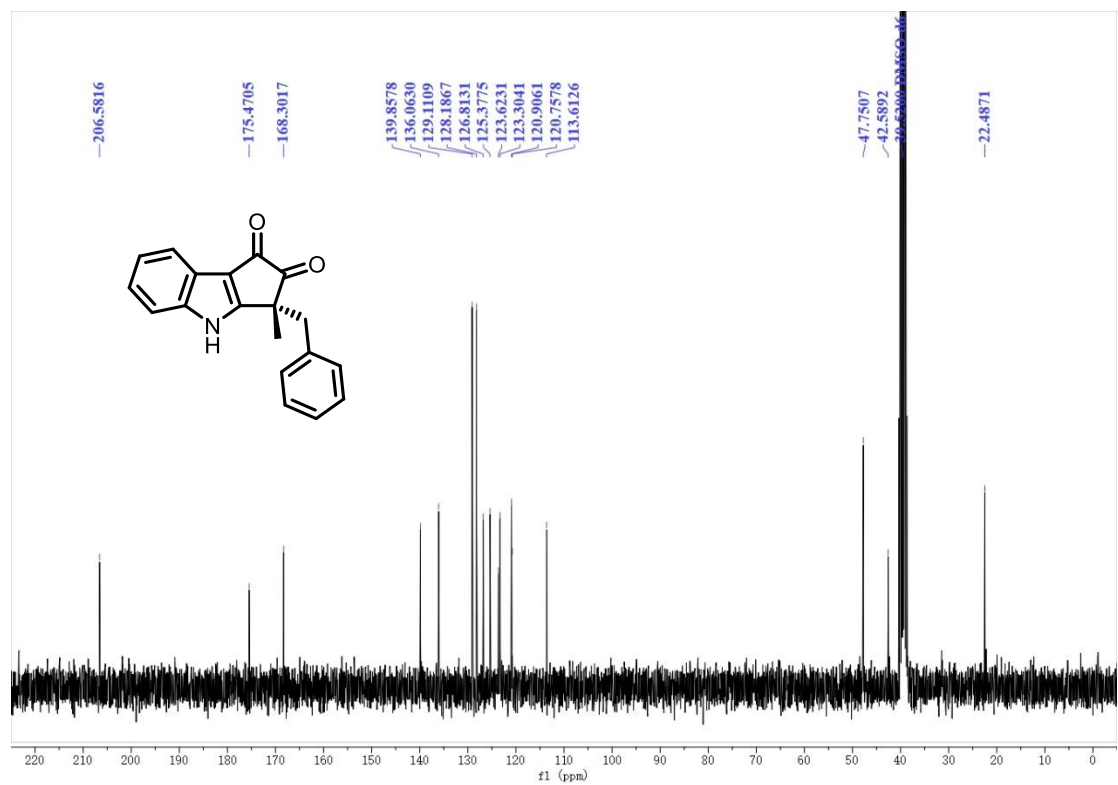

$^1\text{H}$  NMR (400 MHz,  $\text{DMSO-}d_6$ )/ $^{13}\text{C}$  NMR (101 MHz,  $\text{DMSO-}d_6$ )

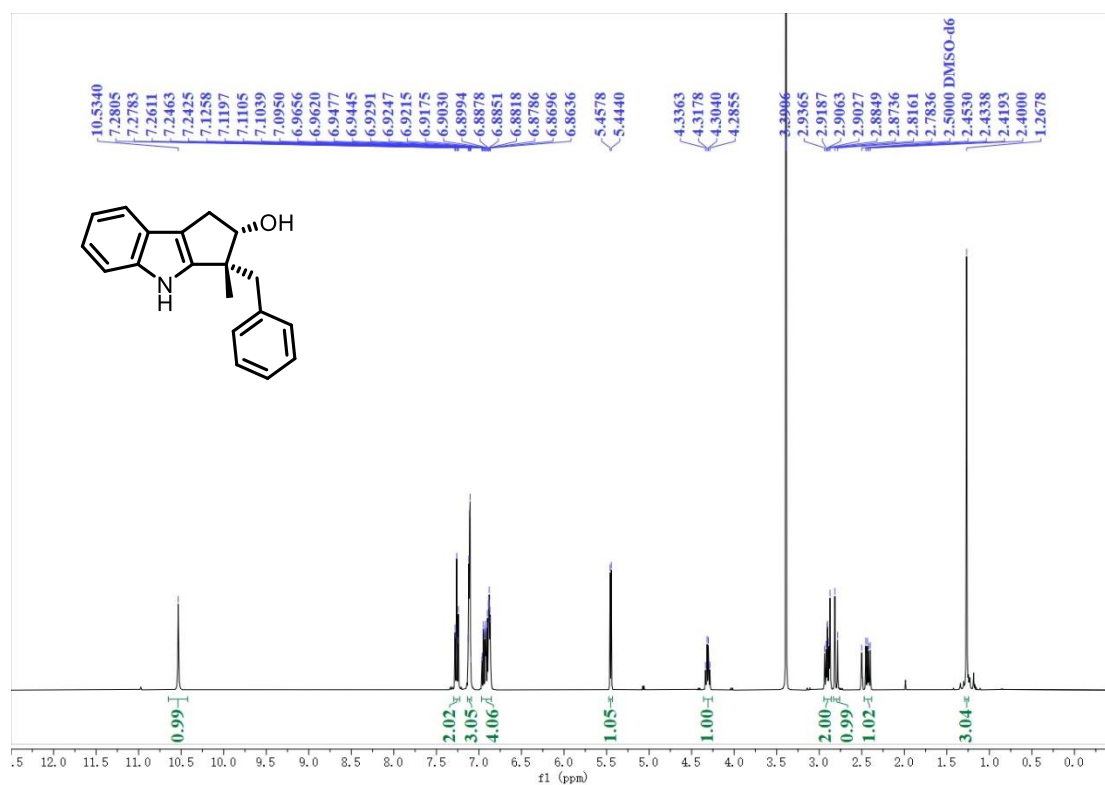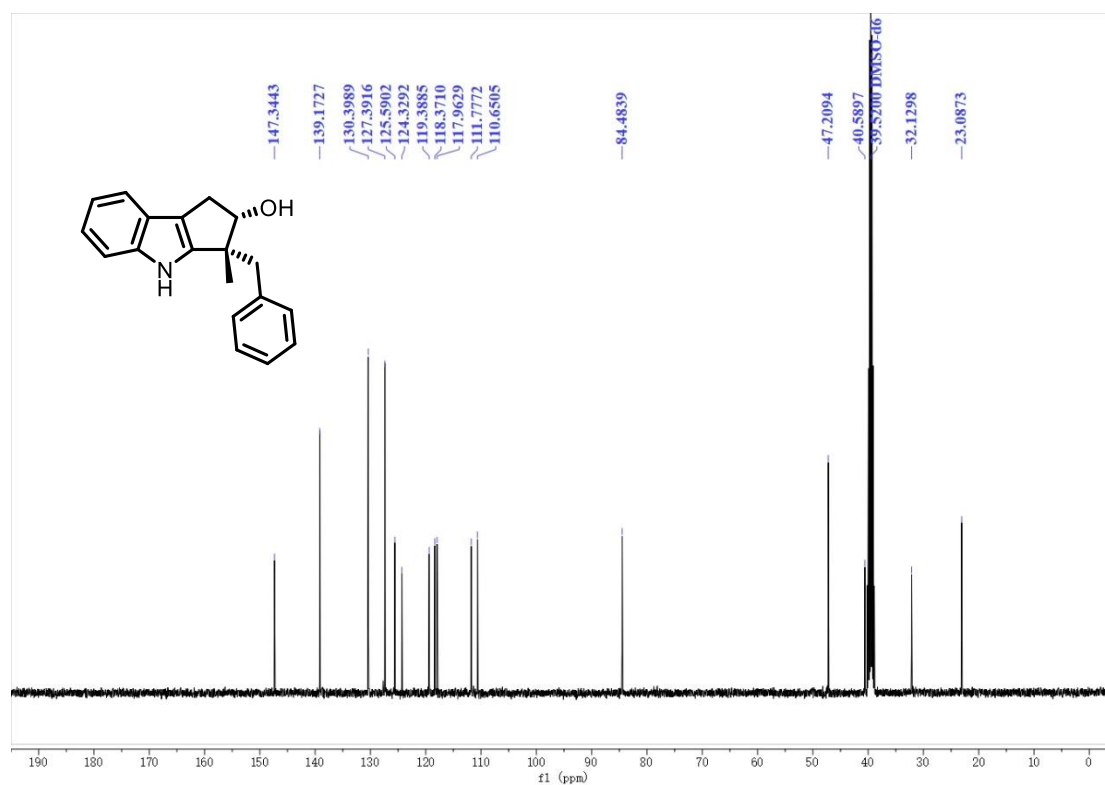

$^1\text{H}$  NMR (400 MHz,  $\text{CHCl}_3\text{-}d$ )/ $^{13}\text{C}$  NMR (75 MHz,  $\text{DMSO-}d_6$ )

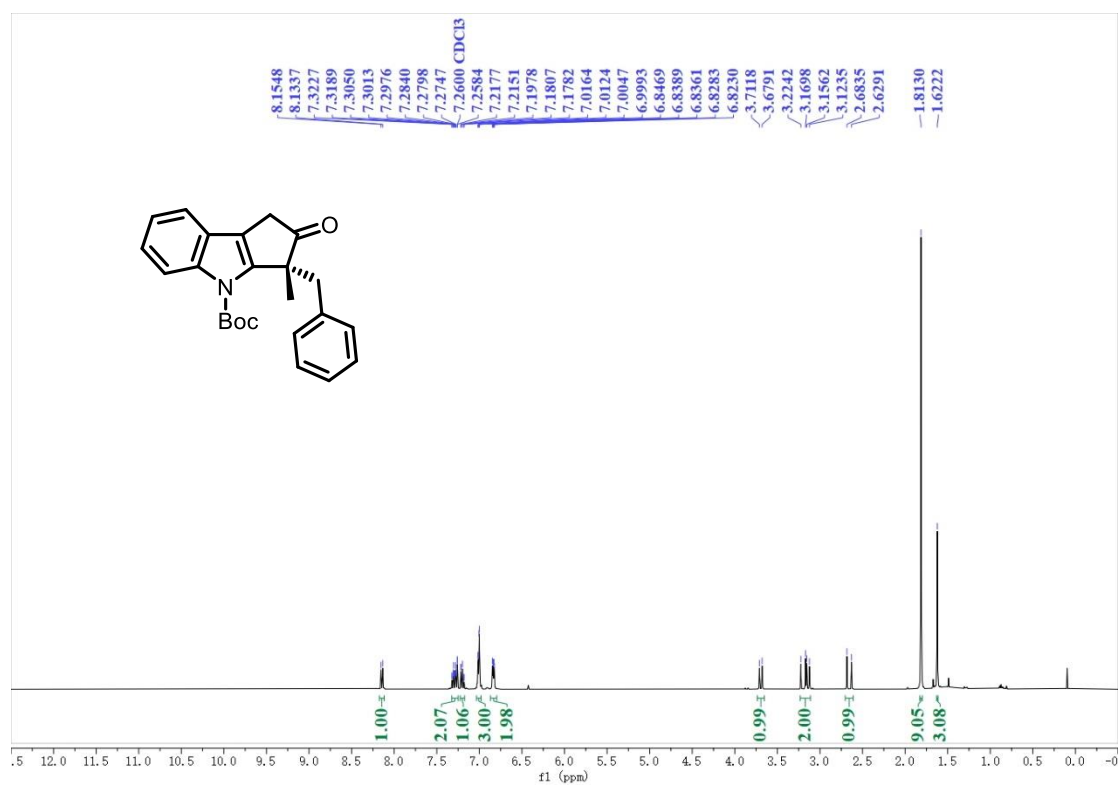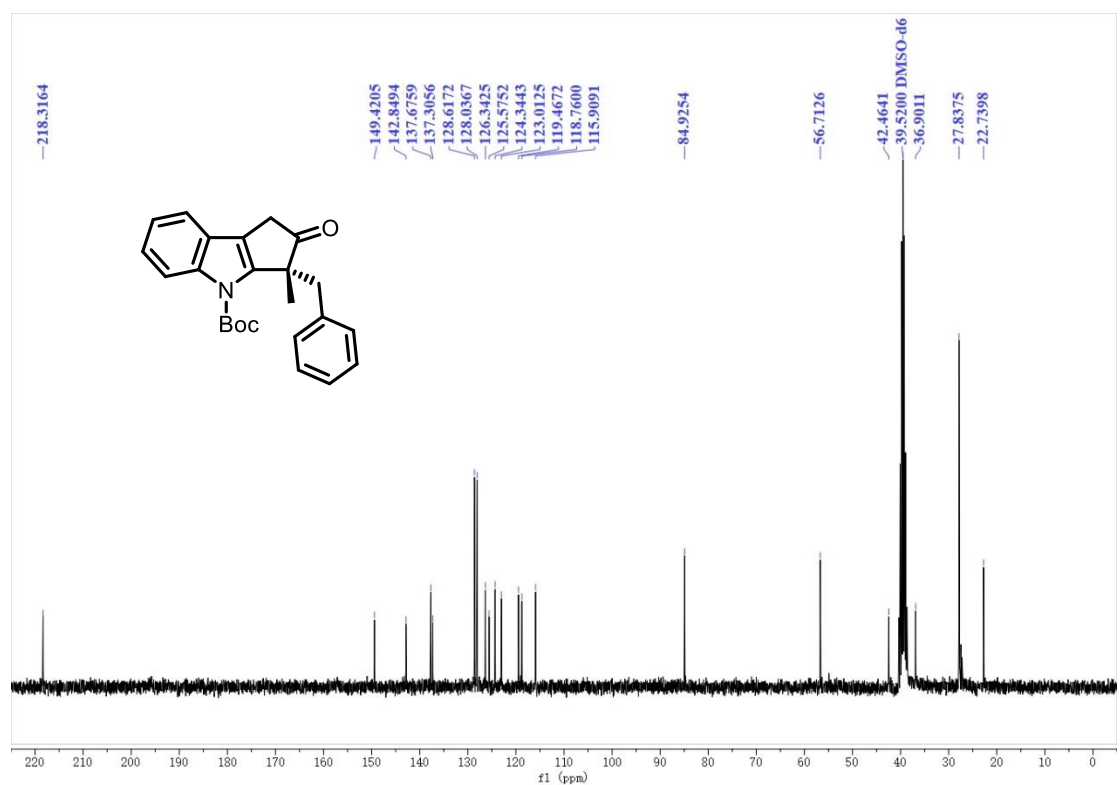

7  $^1\text{H}$  NMR (400 MHz,  $\text{DMSO-}d_6$ )/ $^{13}\text{C}$  NMR (101 MHz,  $\text{DMSO-}d_6$ )

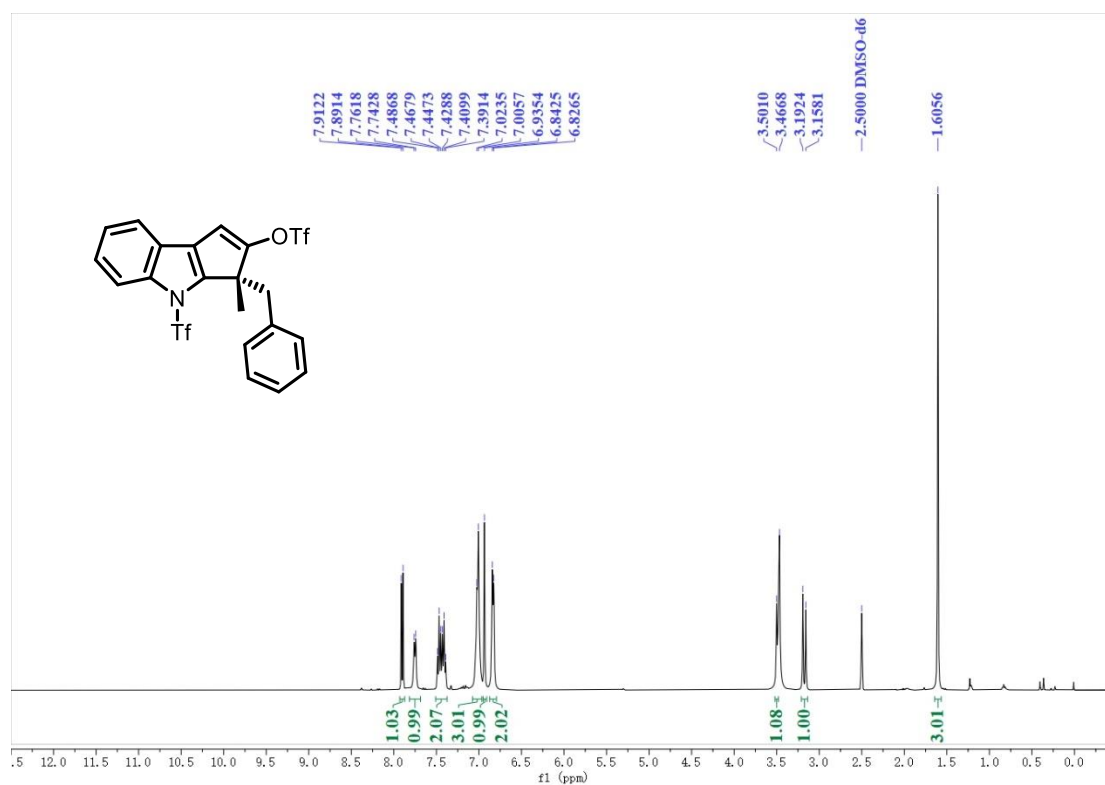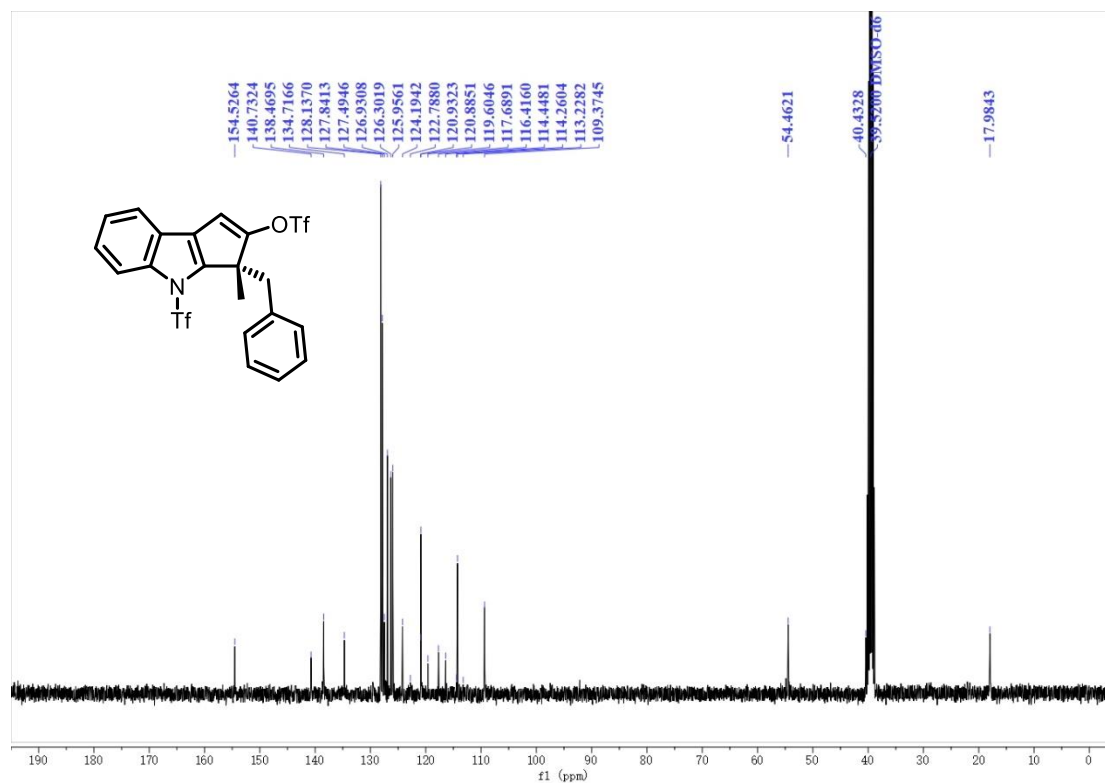



8  $^1\text{H}$  NMR (400 MHz,  $\text{DMSO-}d_6$ )/ $^{13}\text{C}$  NMR (101 MHz,  $\text{DMSO-}d_6$ )

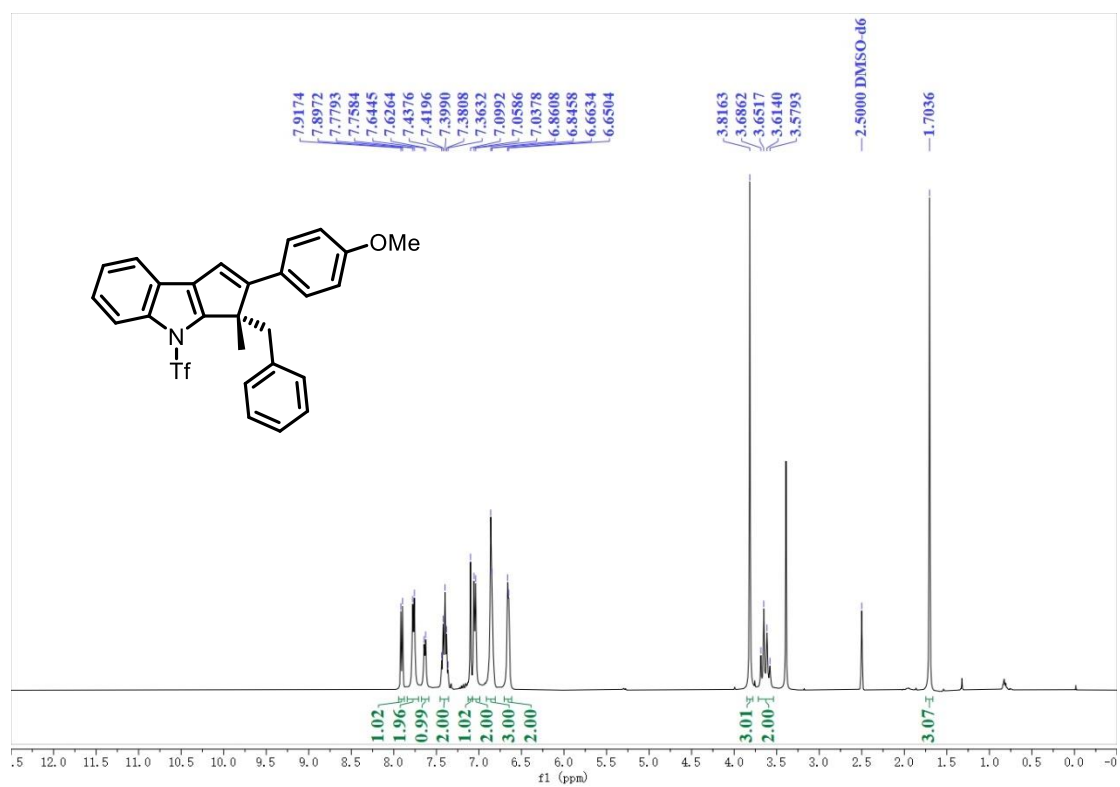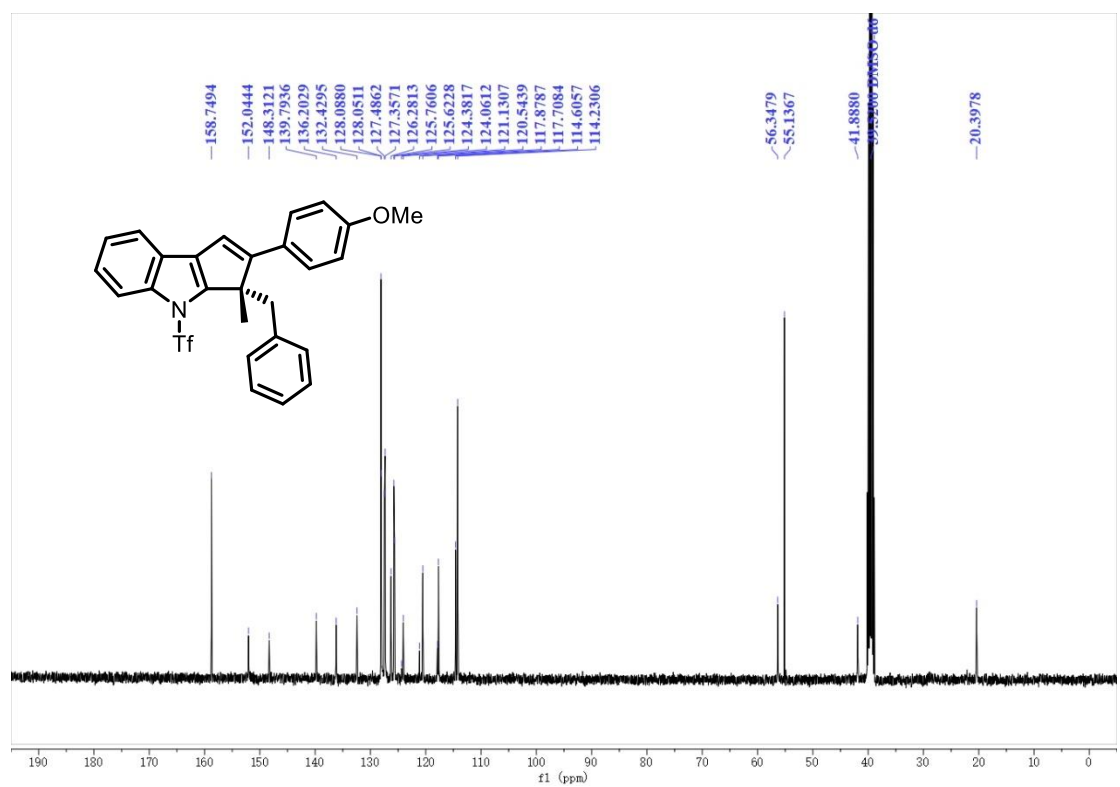

7  $^{19}\text{F}$  NMR (282 MHz,  $\text{DMSO-}d_6$ )

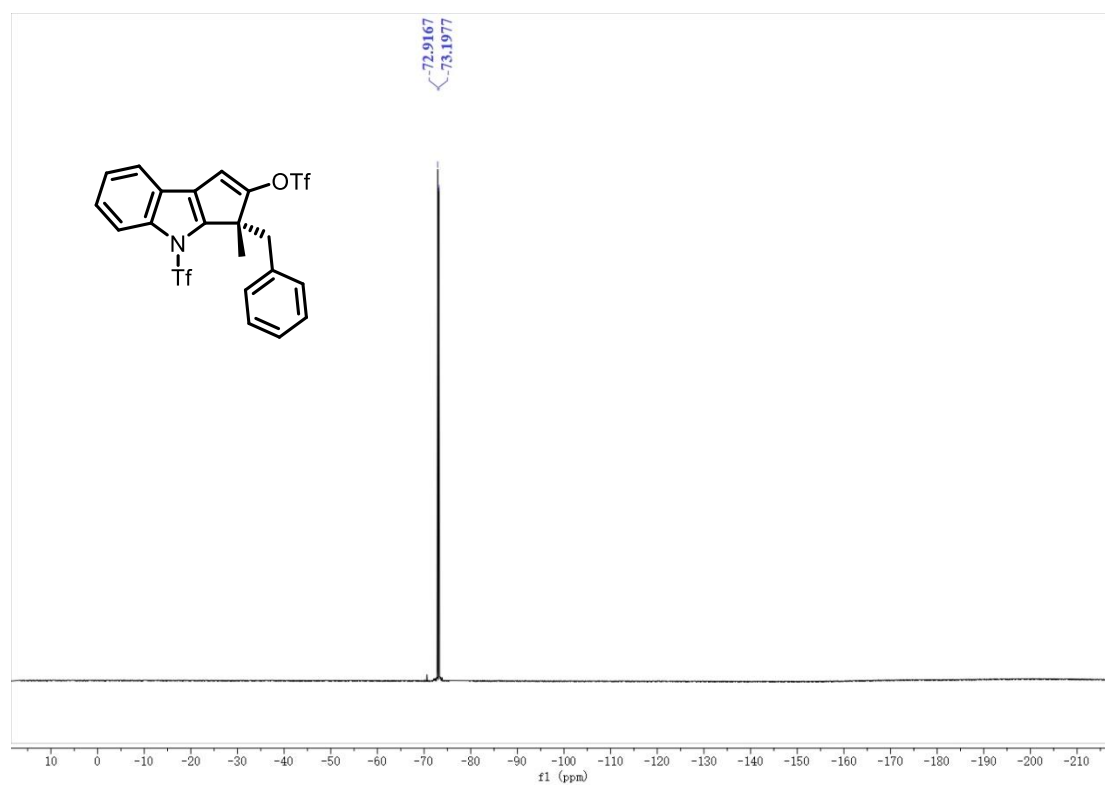

8  $^{19}\text{F}$  NMR (282 MHz,  $\text{DMSO-}d_6$ )

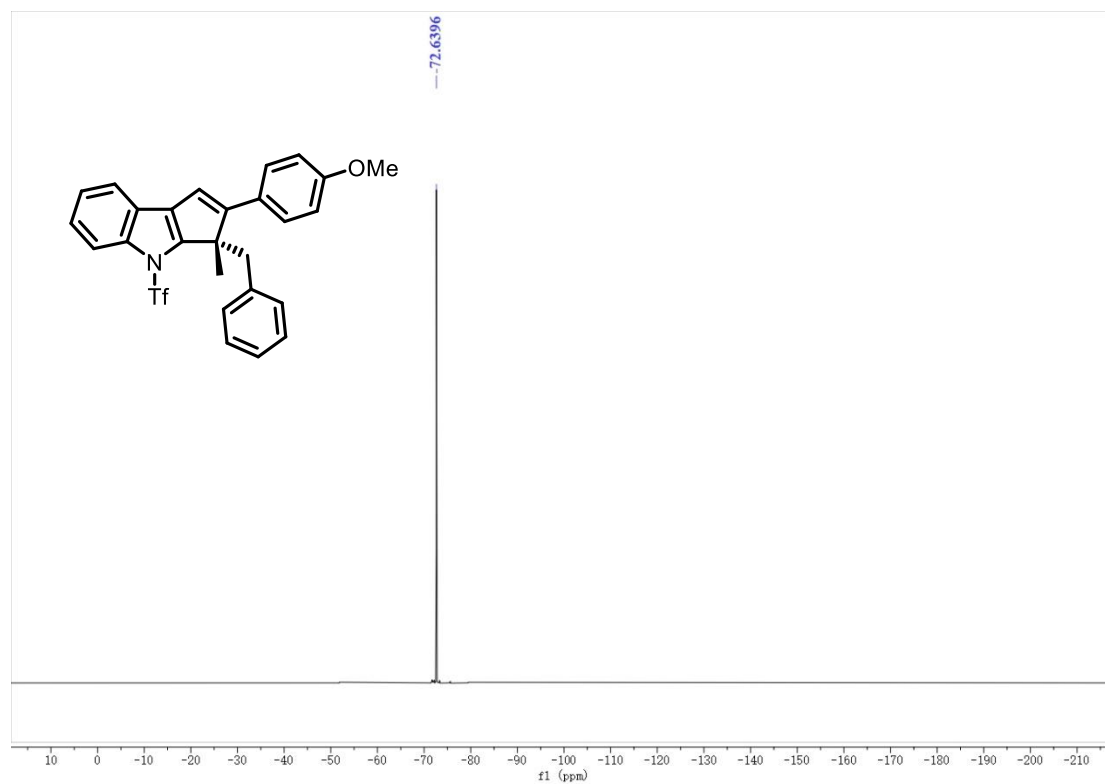

L6  $^1\text{H}$  NMR (300 MHz,  $\text{CHCl}_3-d$ )/ $^{13}\text{C}$  NMR (75 MHz,  $\text{CHCl}_3-d$ )

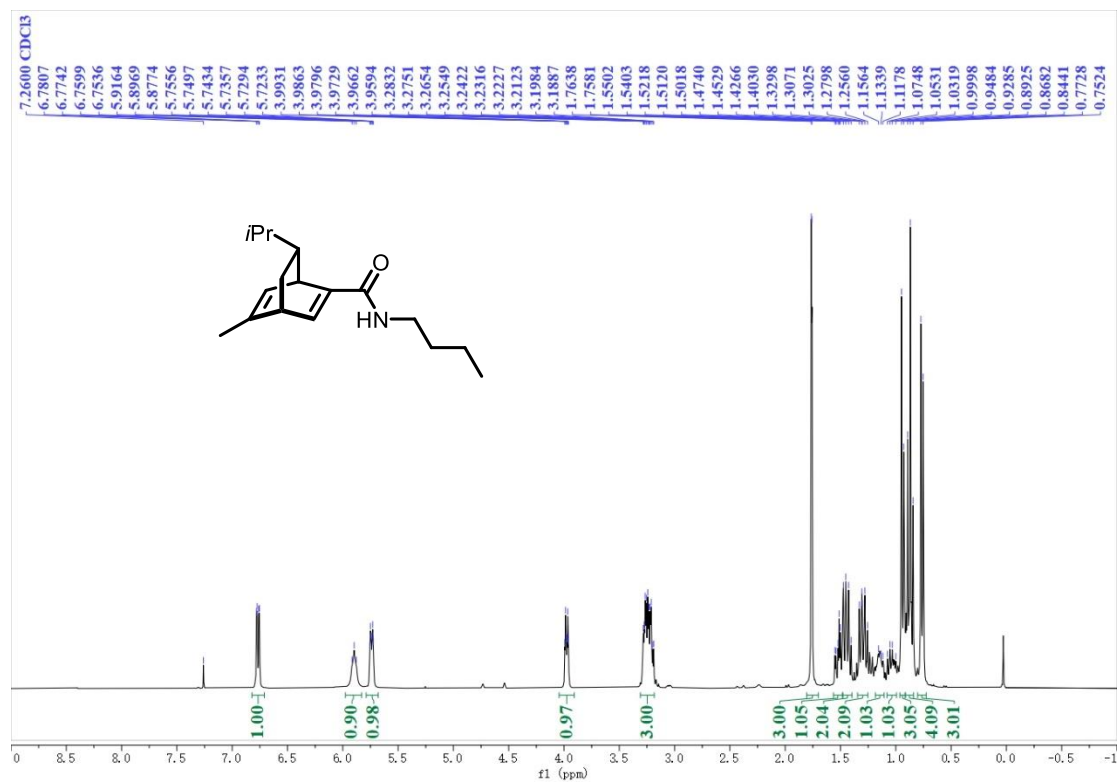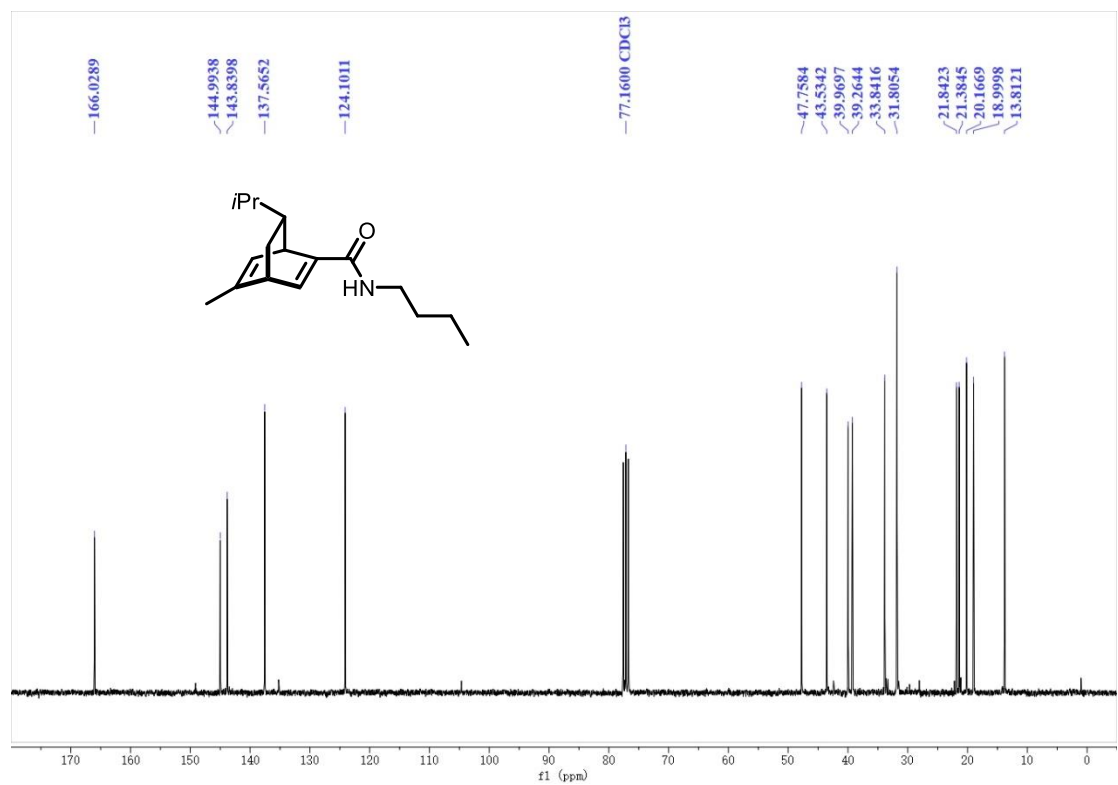

L11  $^1\text{H}$  NMR (300 MHz,  $\text{CHCl}_3-d$ )/ $^{13}\text{C}$  NMR (75 MHz,  $\text{CHCl}_3-d$ )

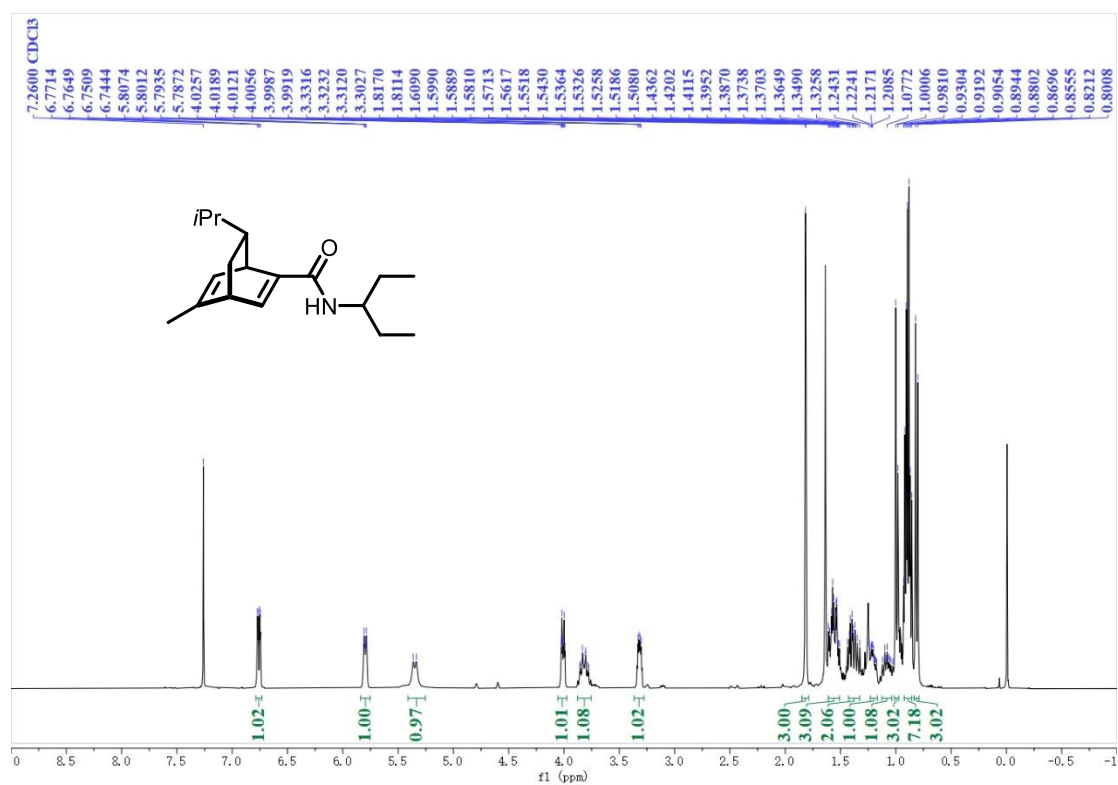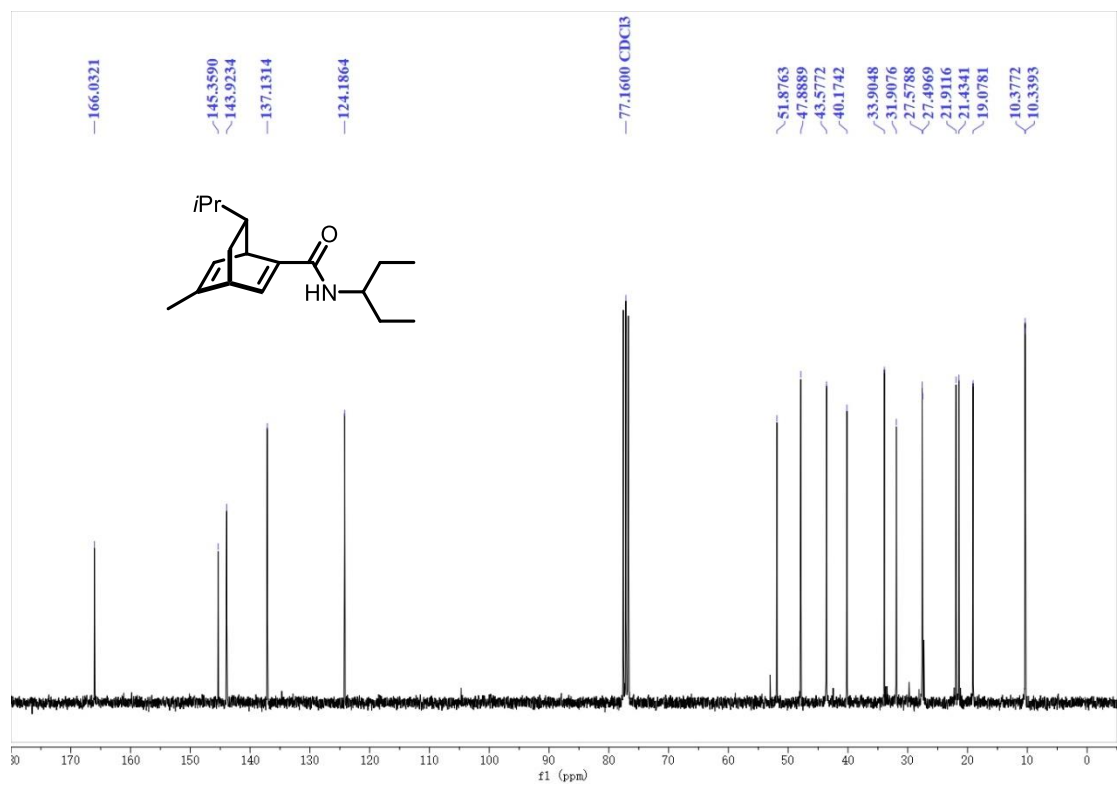

L12  $^1\text{H}$  NMR (300 MHz,  $\text{CHCl}_3-d$ )/ $^{13}\text{C}$  NMR (75 MHz,  $\text{CHCl}_3-d$ )

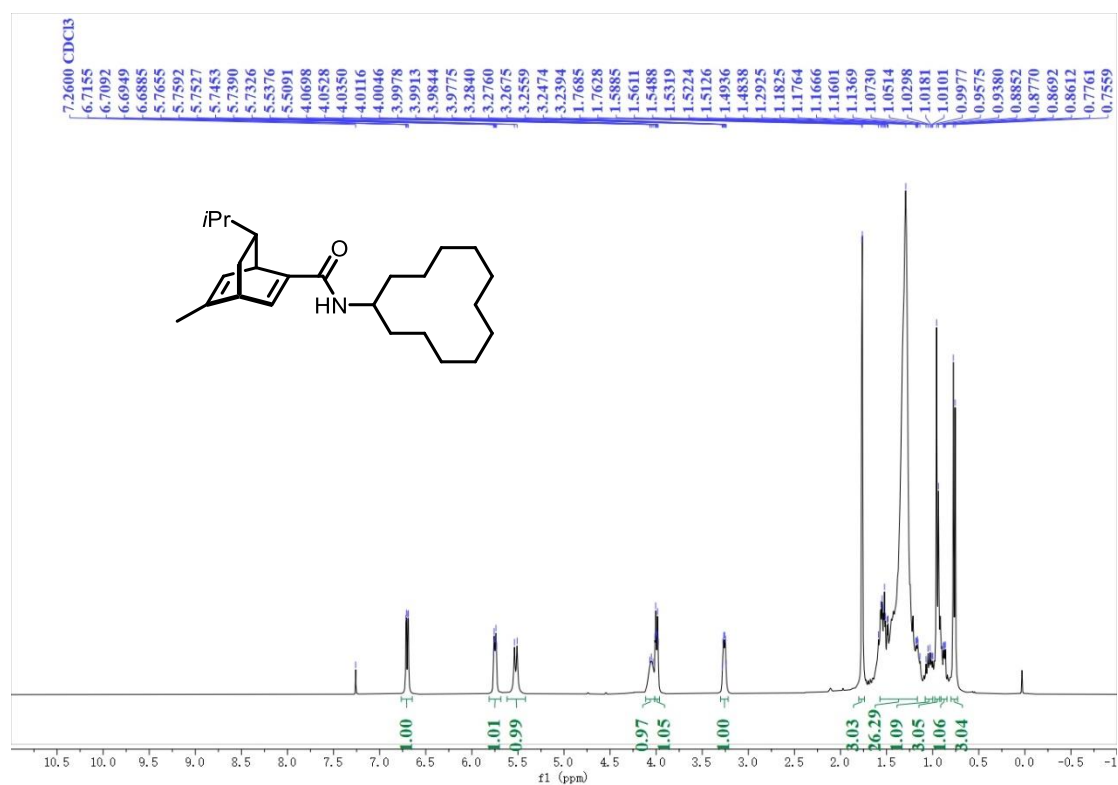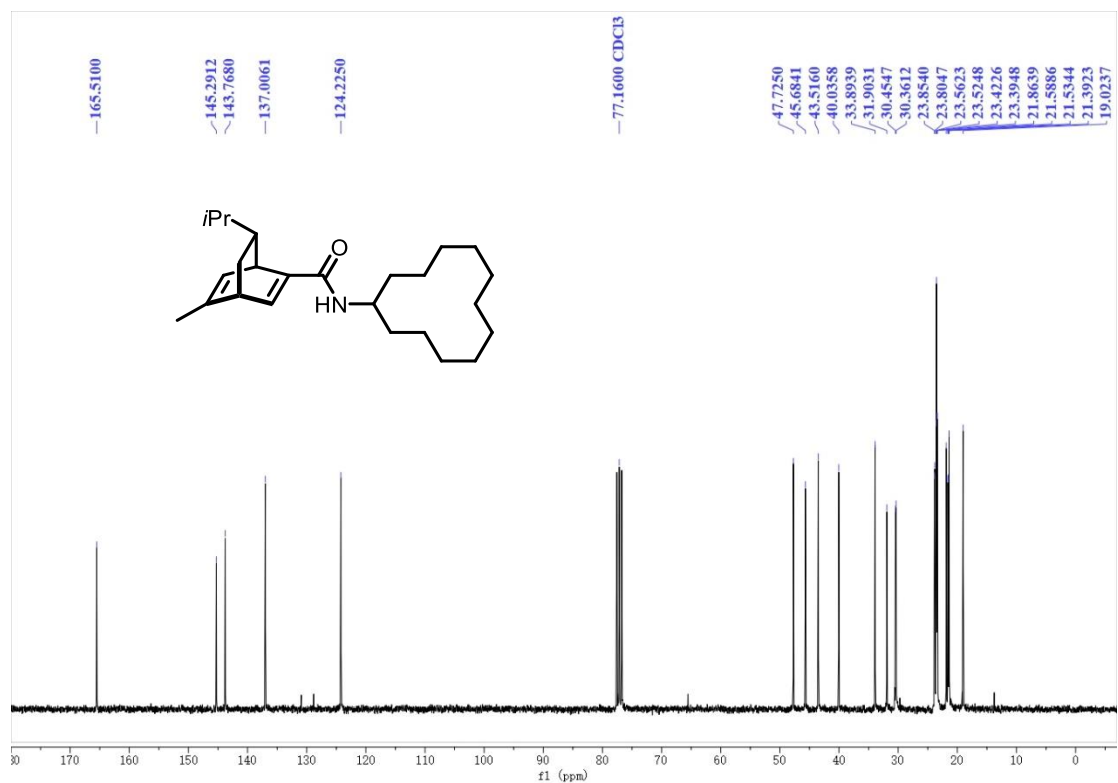

L14  $^1\text{H}$  NMR (300 MHz,  $\text{CHCl}_3\text{-d}$ )/ $^{13}\text{C}$  NMR (75 MHz,  $\text{CHCl}_3\text{-d}$ )

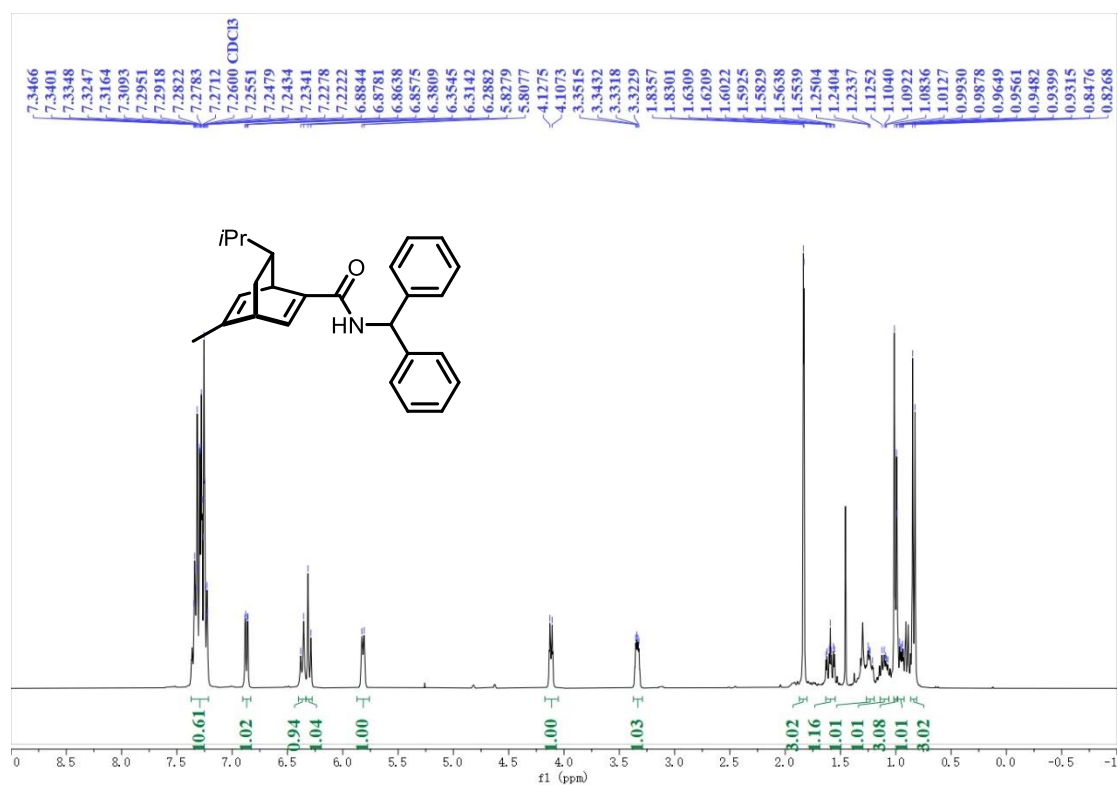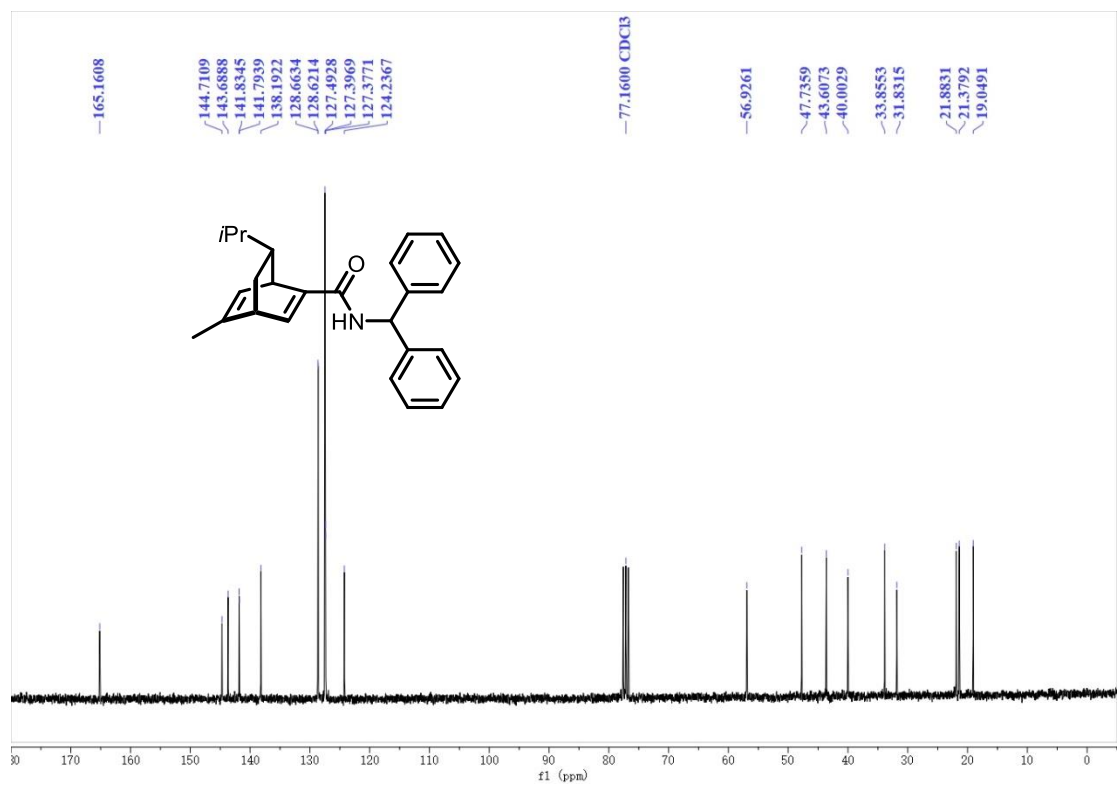

L15  $^1\text{H}$  NMR (300 MHz,  $\text{CHCl}_3-d$ )/ $^{13}\text{C}$  NMR (75 MHz,  $\text{CHCl}_3-d$ )

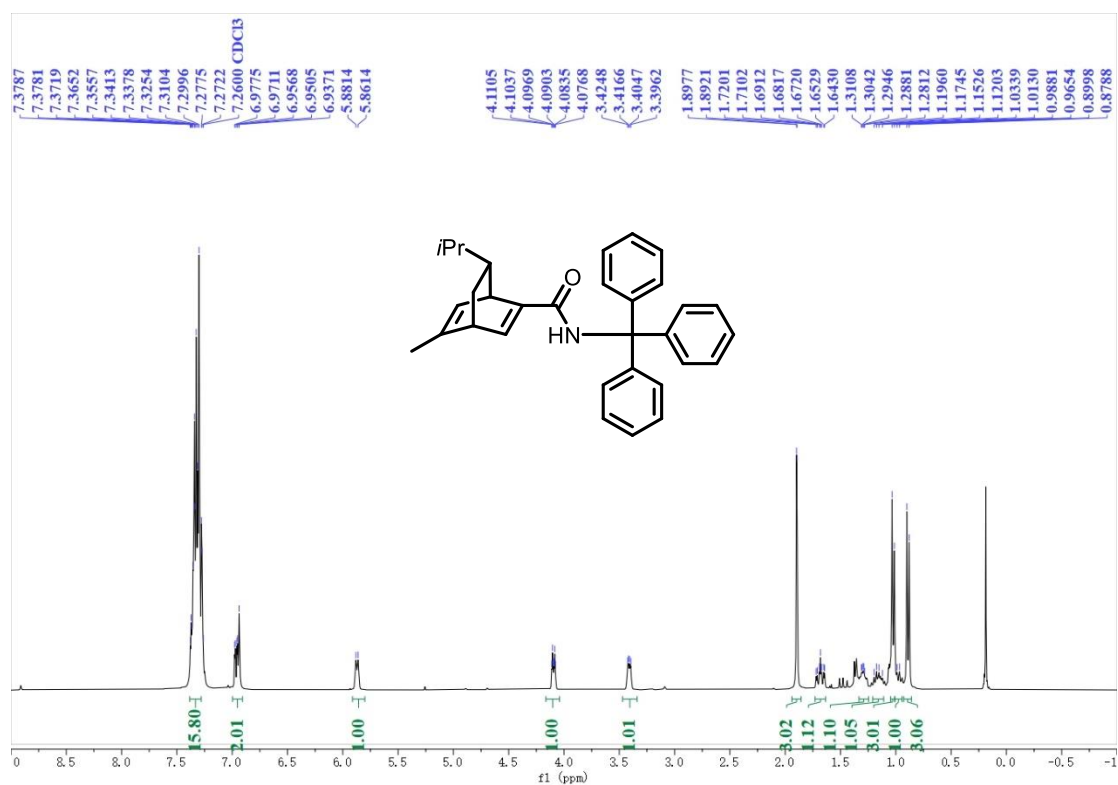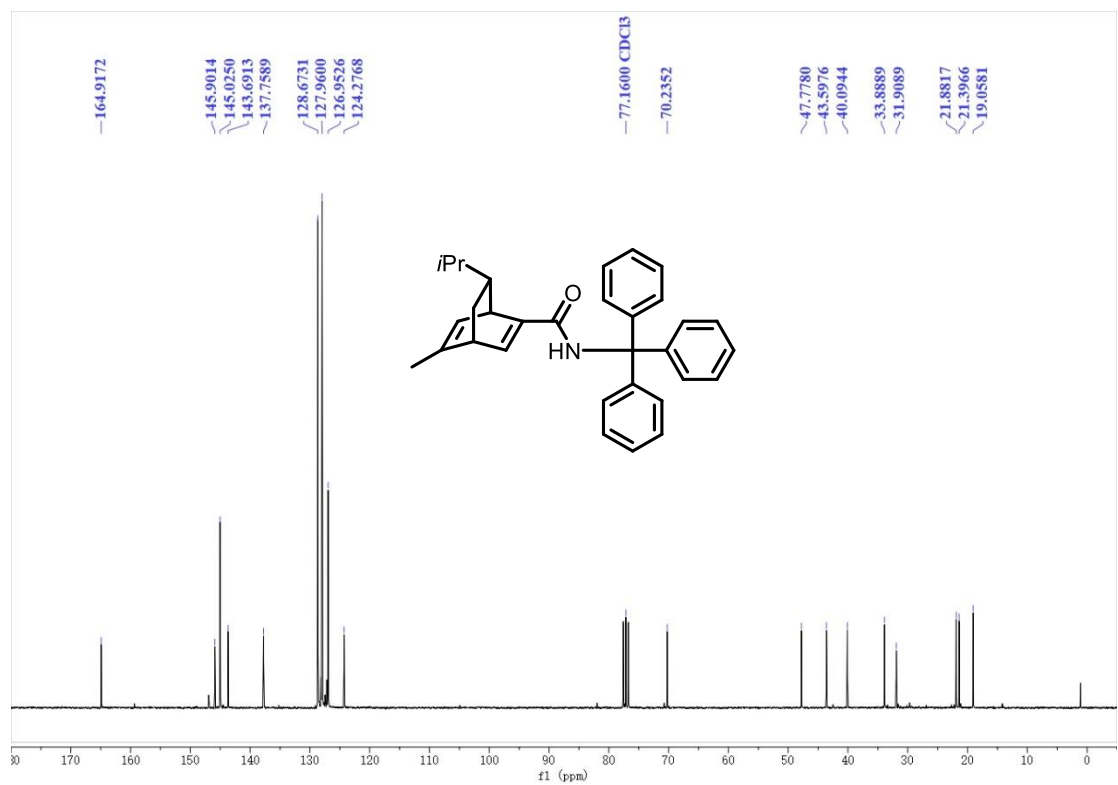

L5  $^1\text{H}$  NMR (300 MHz,  $\text{CHCl}_3\text{-}d$ )/ $^{13}\text{C}$  NMR (75 MHz,  $\text{CHCl}_3\text{-}d$ )

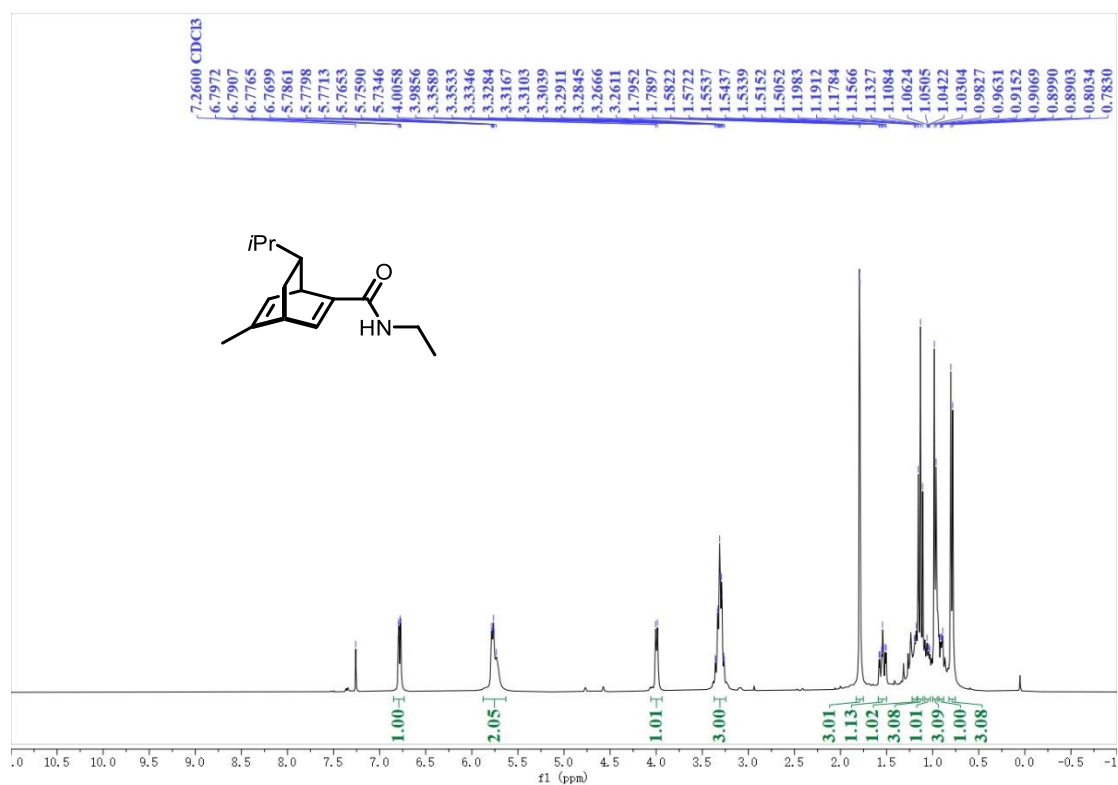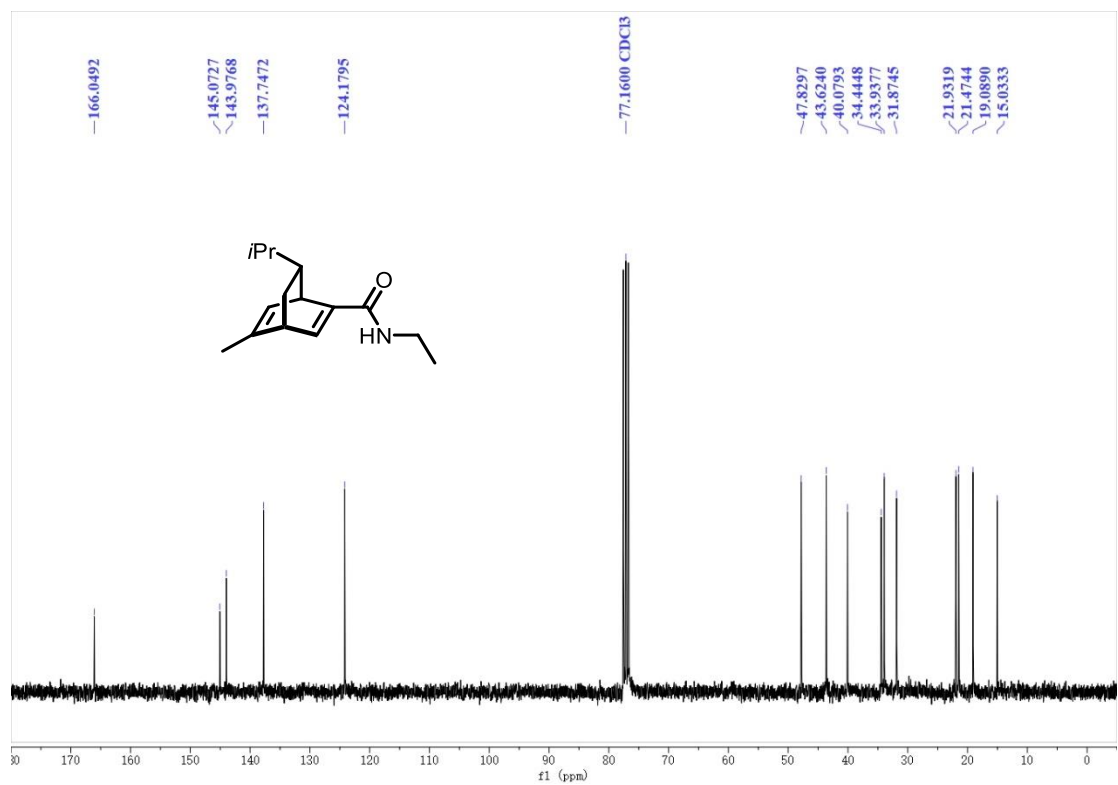



L17  $^1\text{H}$  NMR (300 MHz,  $\text{CHCl}_3-d$ )/ $^{13}\text{C}$  NMR (75 MHz,  $\text{CHCl}_3-d$ )

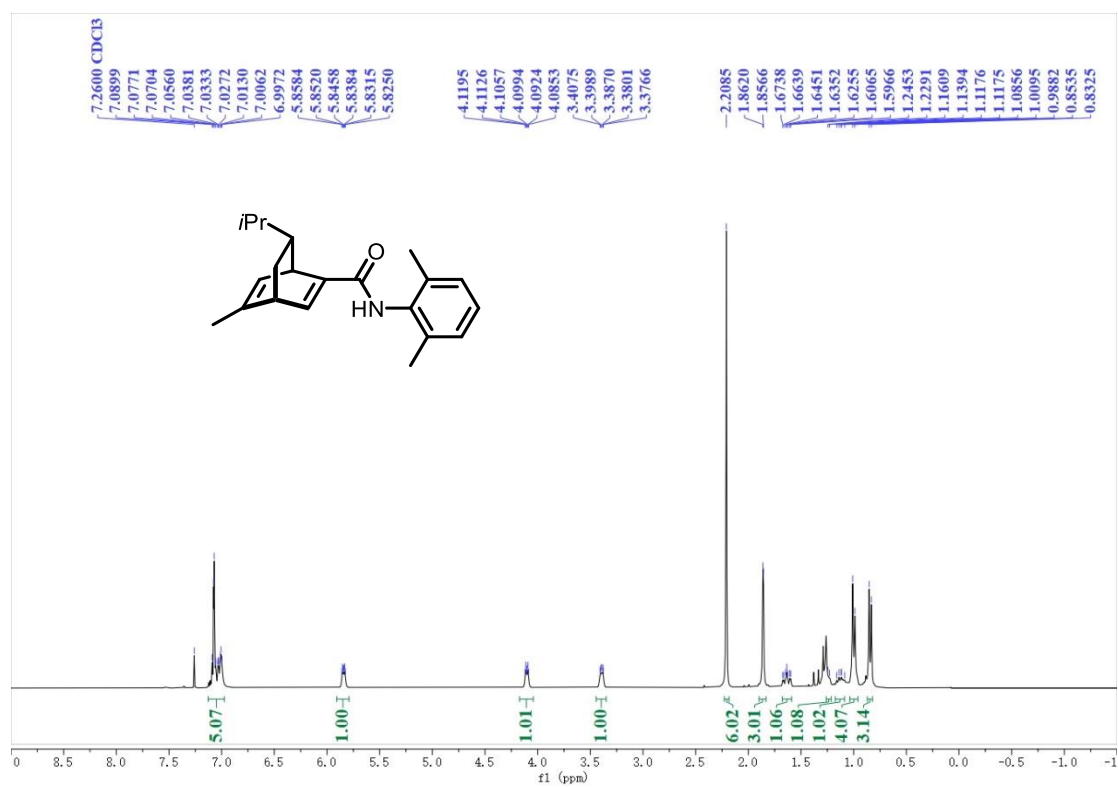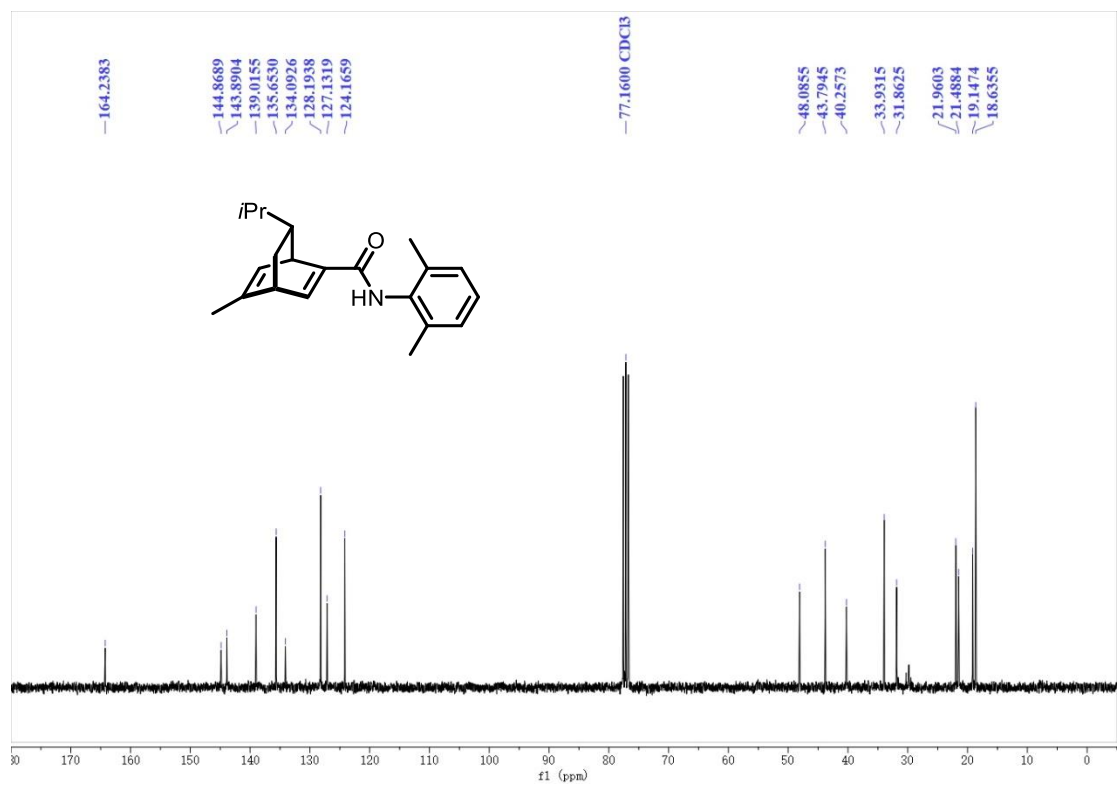

L13  $^1\text{H}$  NMR (300 MHz,  $\text{CHCl}_3-d$ )/ $^{13}\text{C}$  NMR (75 MHz,  $\text{CHCl}_3-d$ )

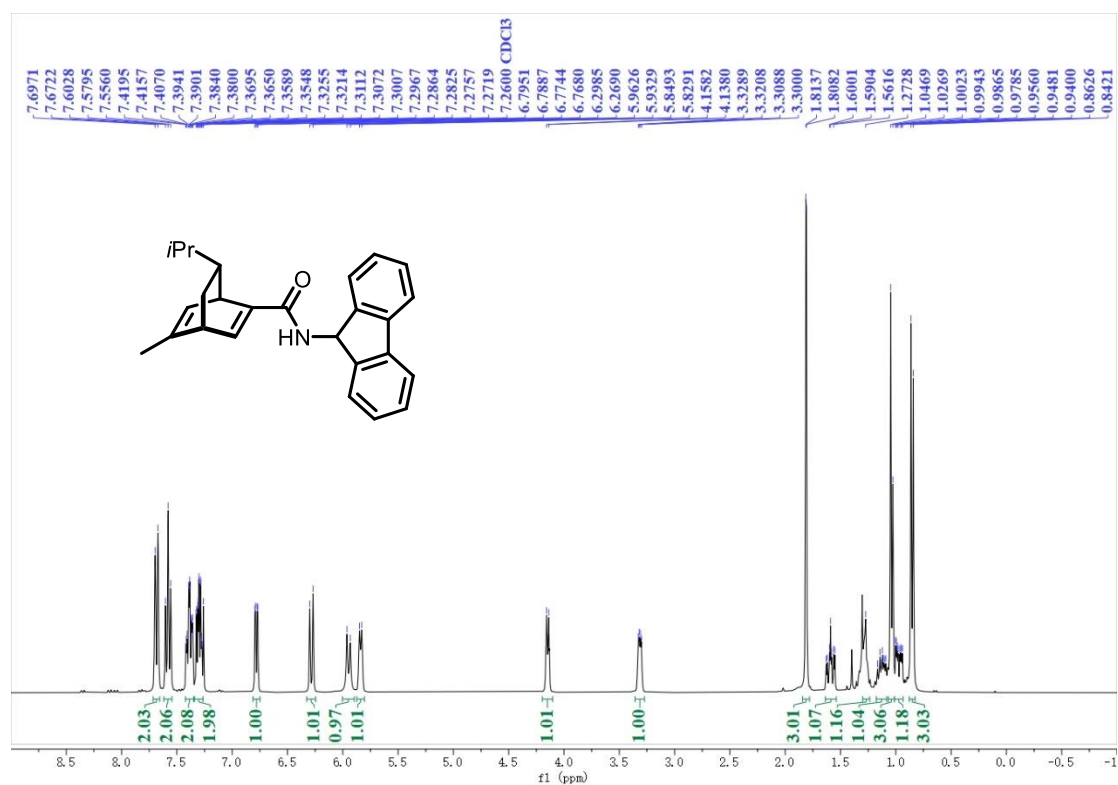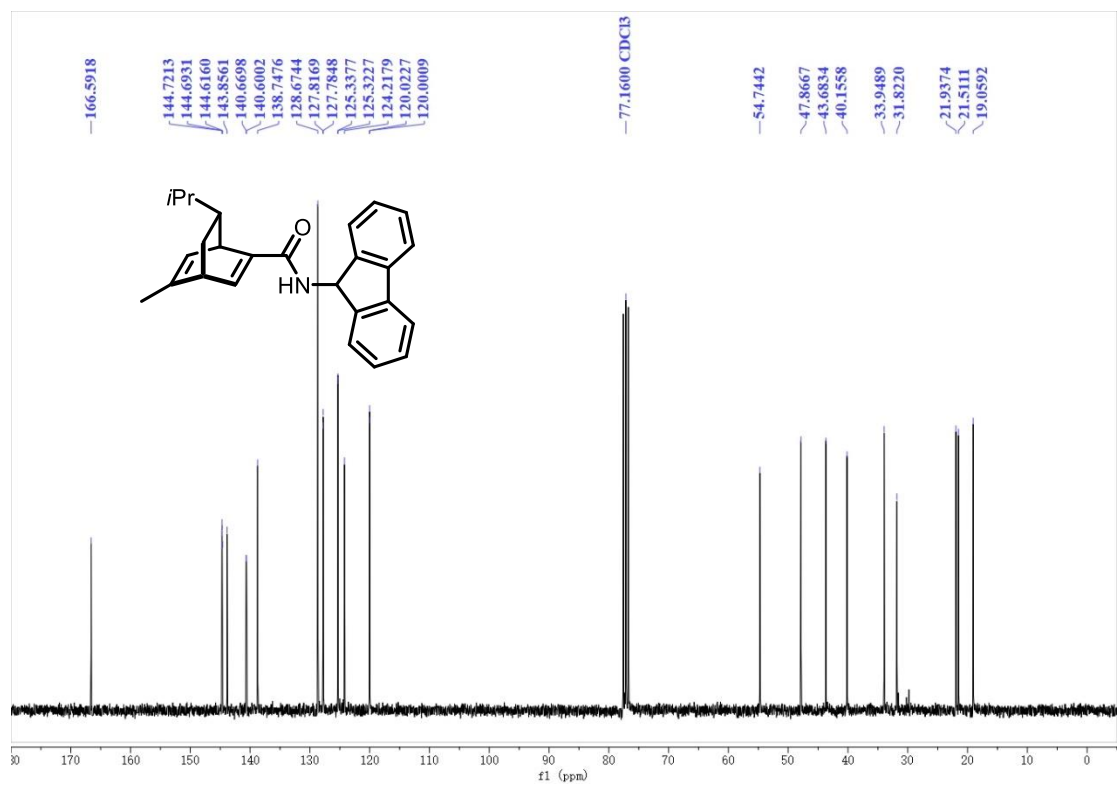

**1c**  $^1\text{H}$  NMR (300 MHz,  $\text{CHCl}_3-d$ )/ $^{13}\text{C}$  NMR (75 MHz,  $\text{CHCl}_3-d$ )

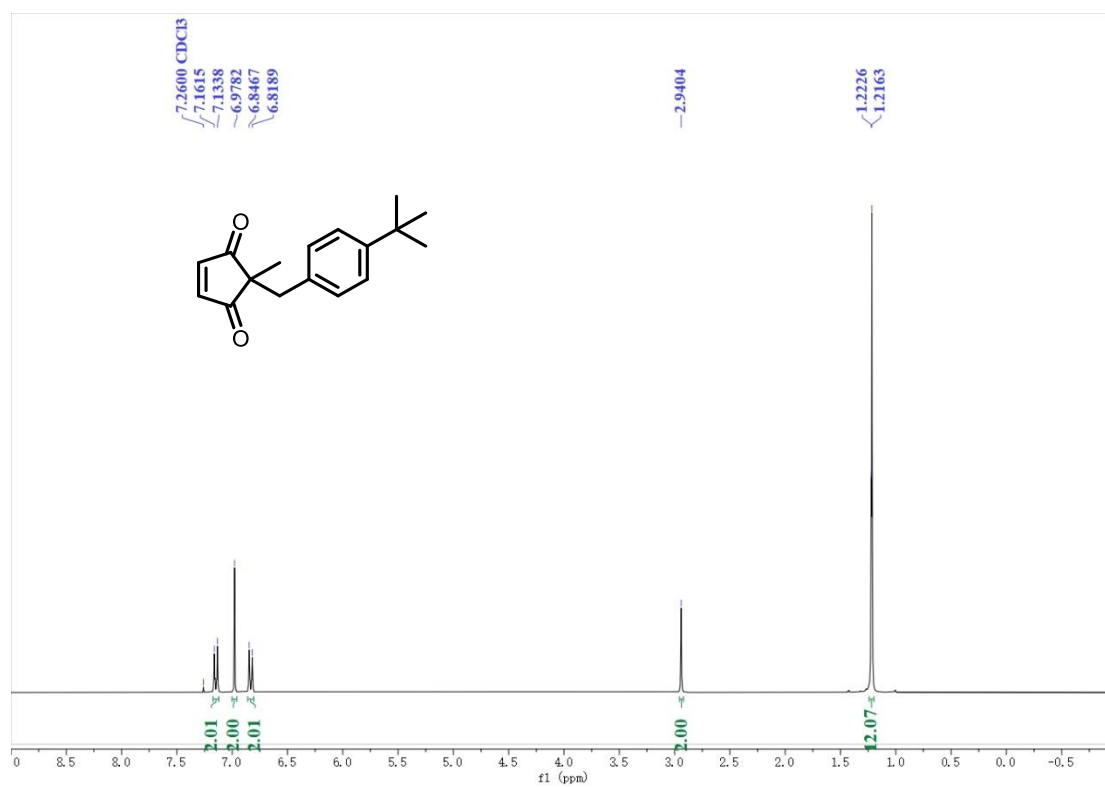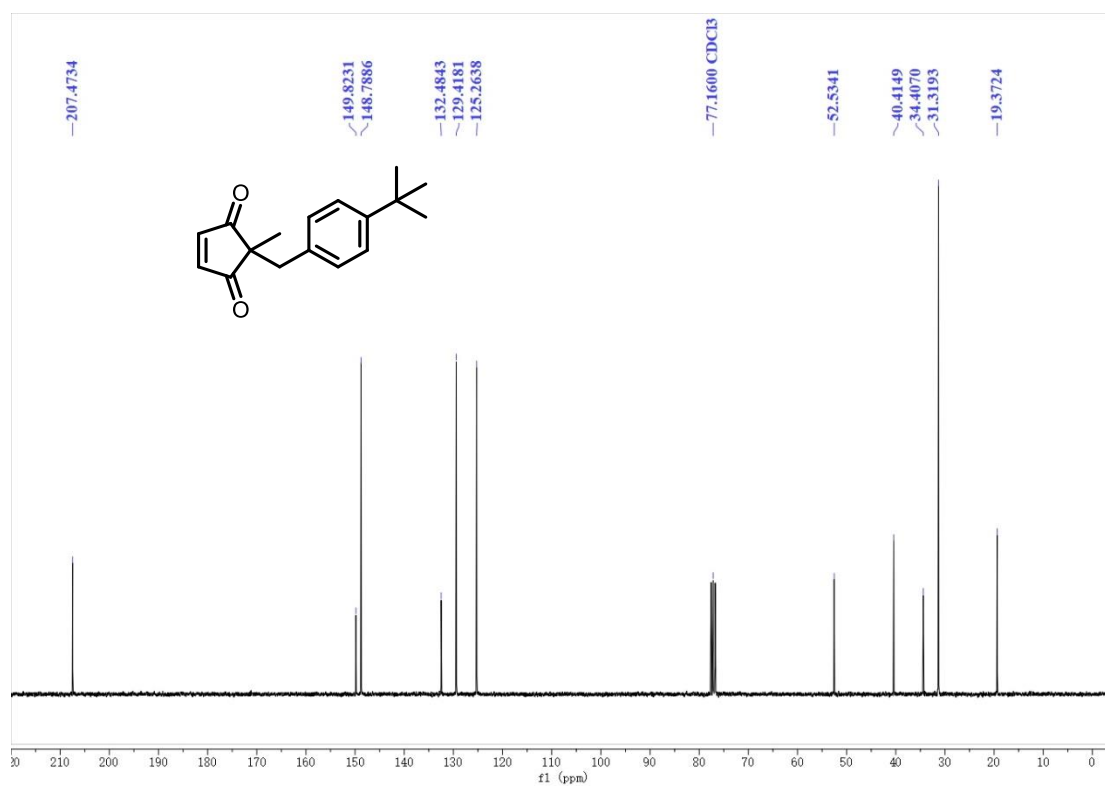

**1j**  $^1\text{H}$  NMR (300 MHz,  $\text{CHCl}_3-d$ )/ $^{13}\text{C}$  NMR (75 MHz,  $\text{CHCl}_3-d$ )

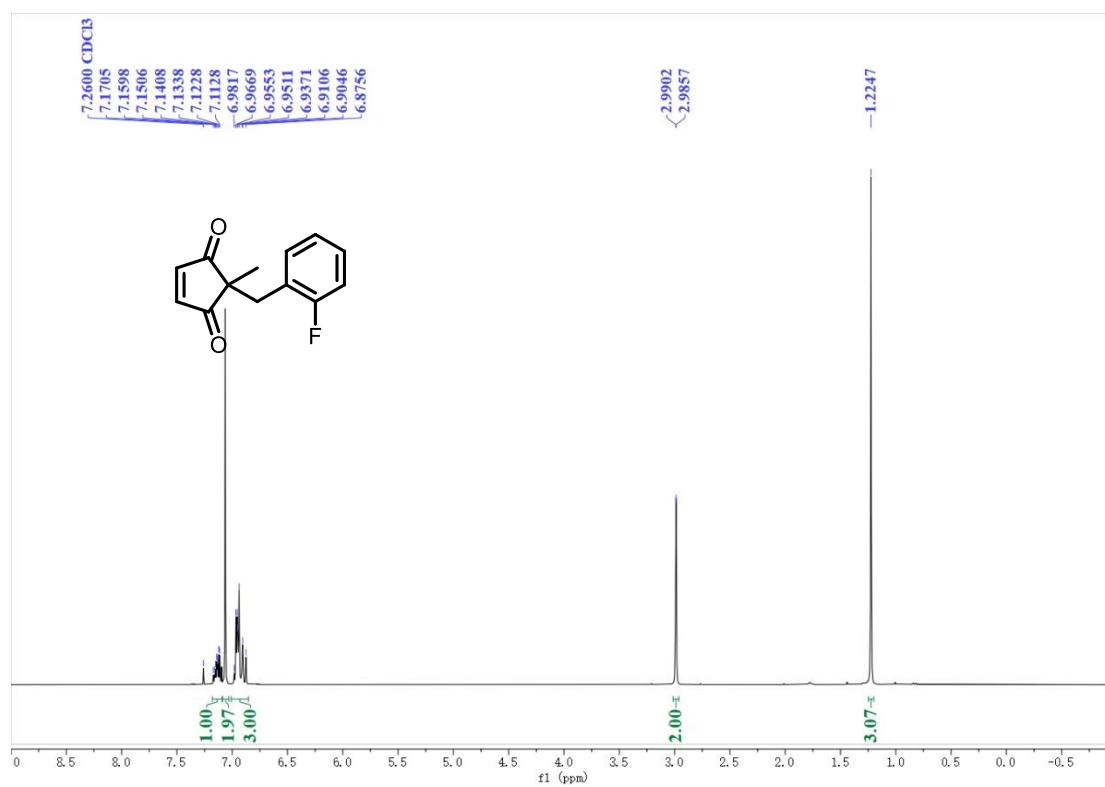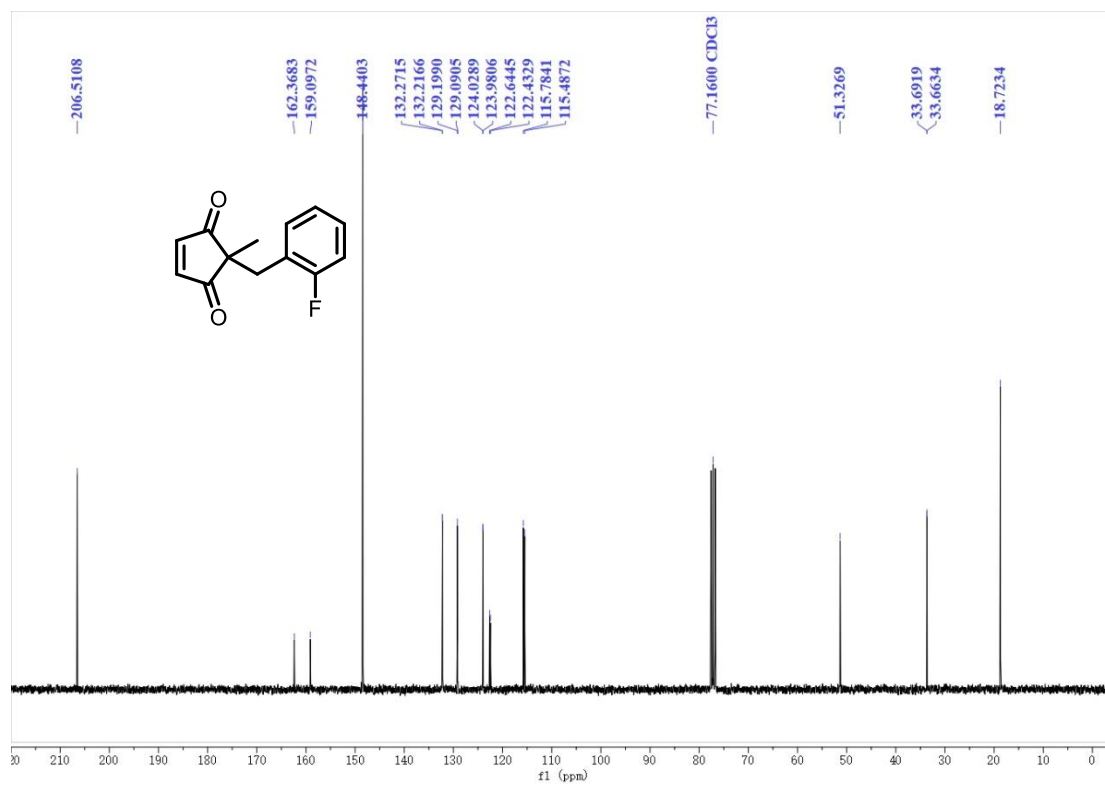

**1j**  $^{19}\text{F}$  NMR (282 MHz,  $\text{CHCl}_3-d$ )

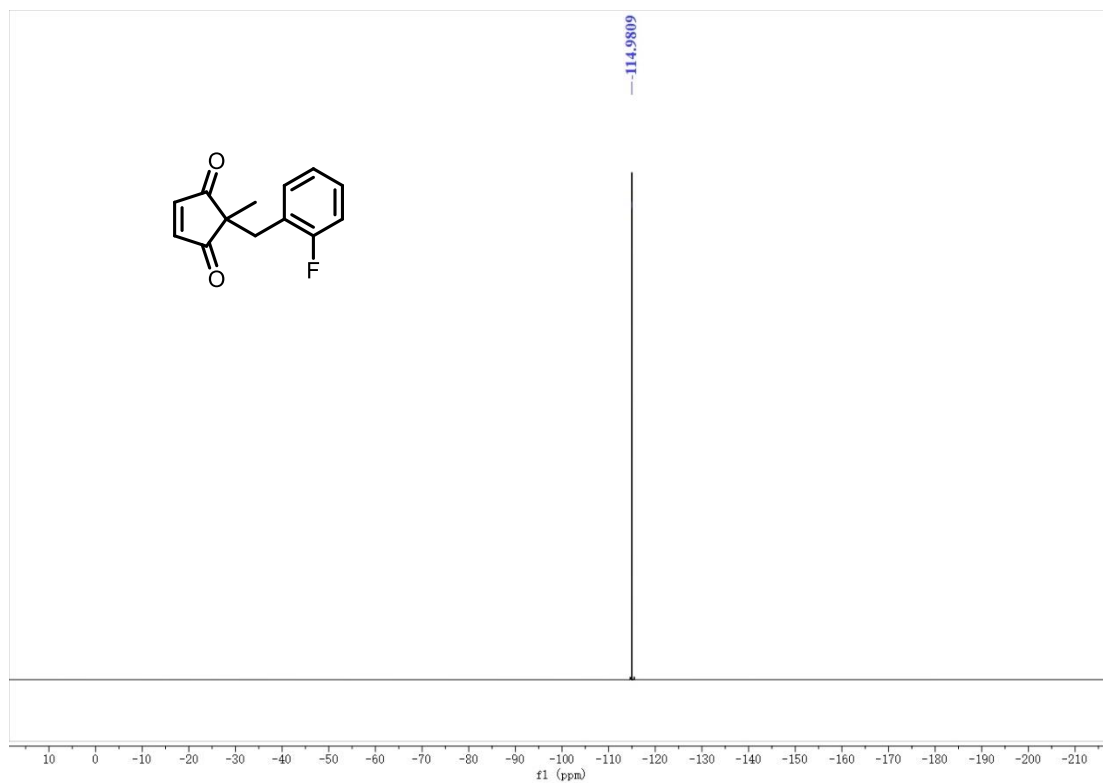

1s  $^1\text{H}$  NMR (300 MHz,  $\text{CHCl}_3-d$ )/ $^{13}\text{C}$  NMR (75 MHz,  $\text{CHCl}_3-d$ )

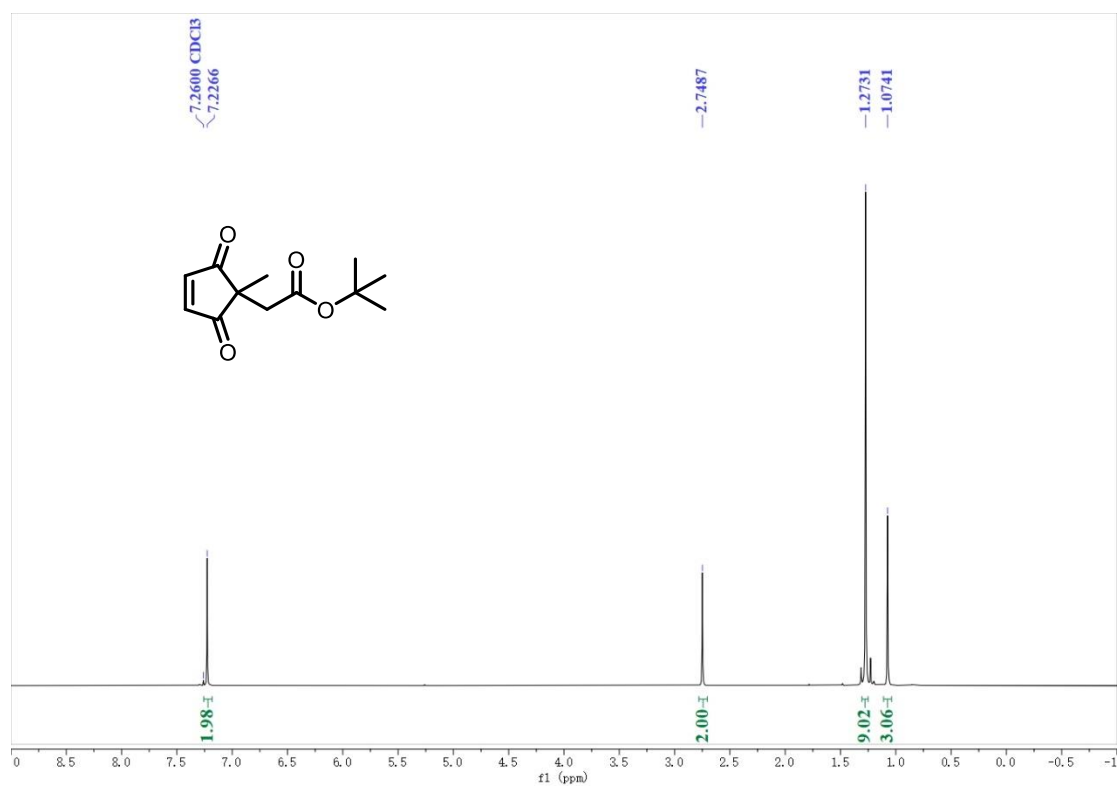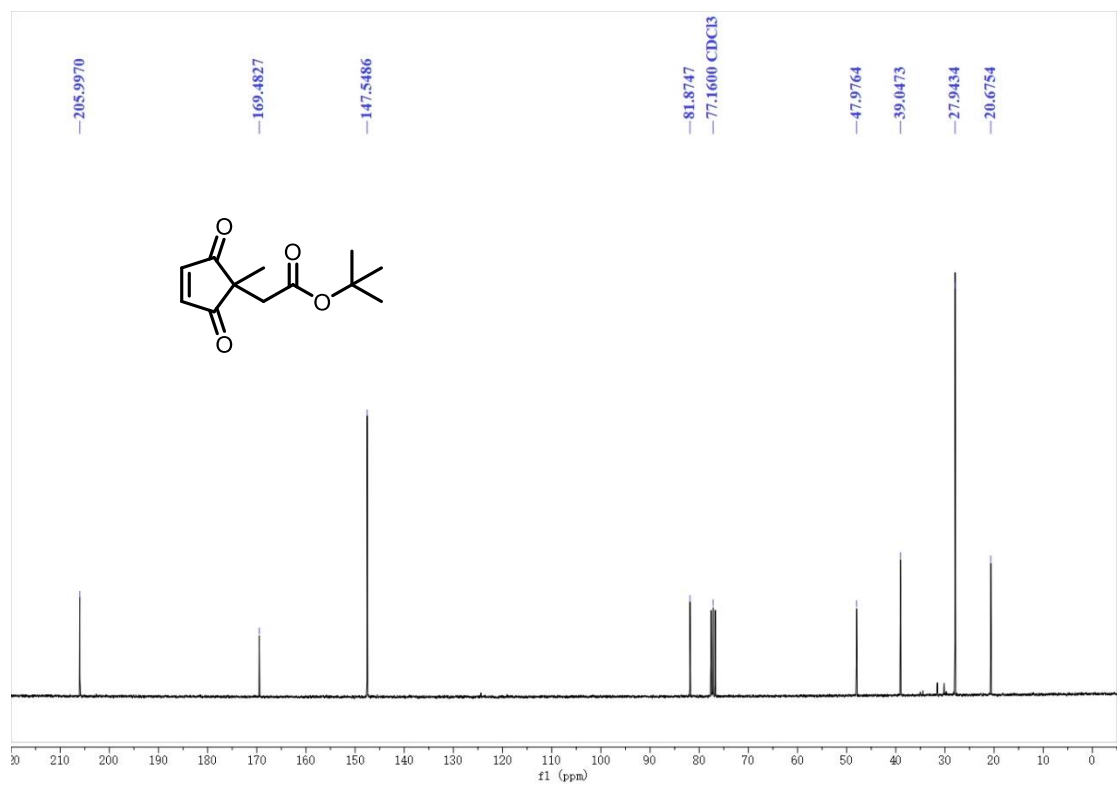

**1p**  $^1\text{H}$  NMR (300 MHz,  $\text{CHCl}_3-d$ ) /  $^{13}\text{C}$  NMR (75 MHz,  $\text{CHCl}_3-d$ )

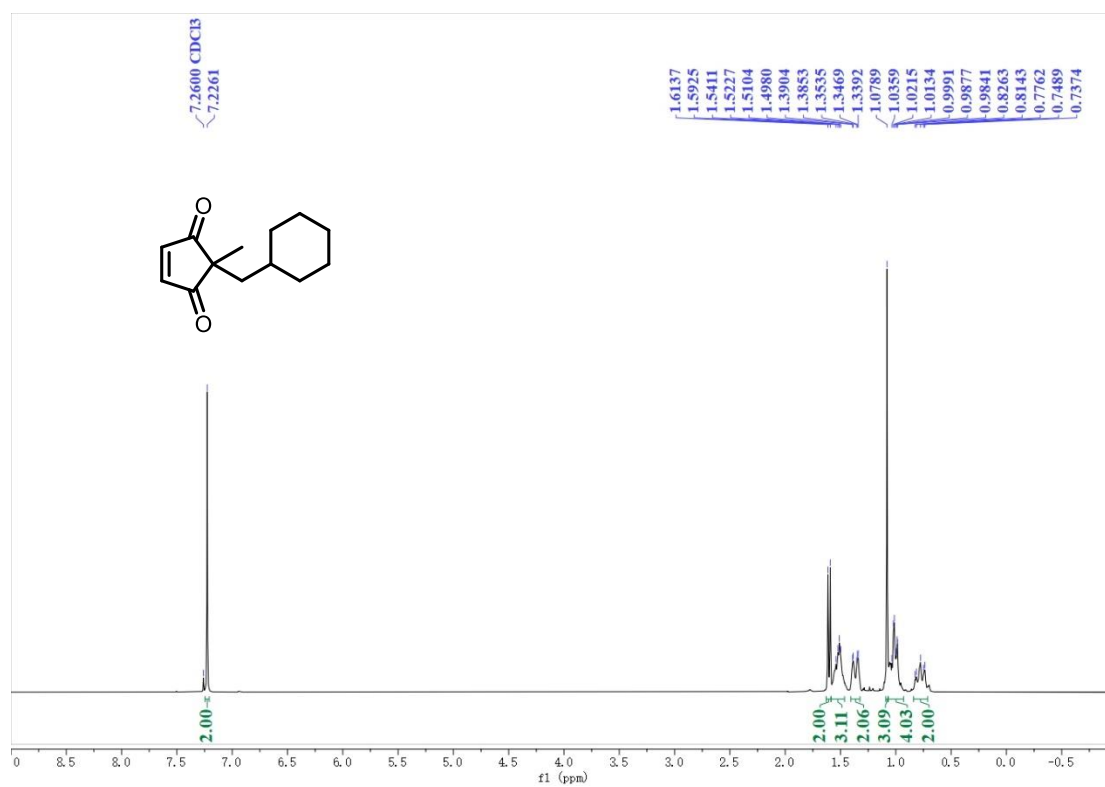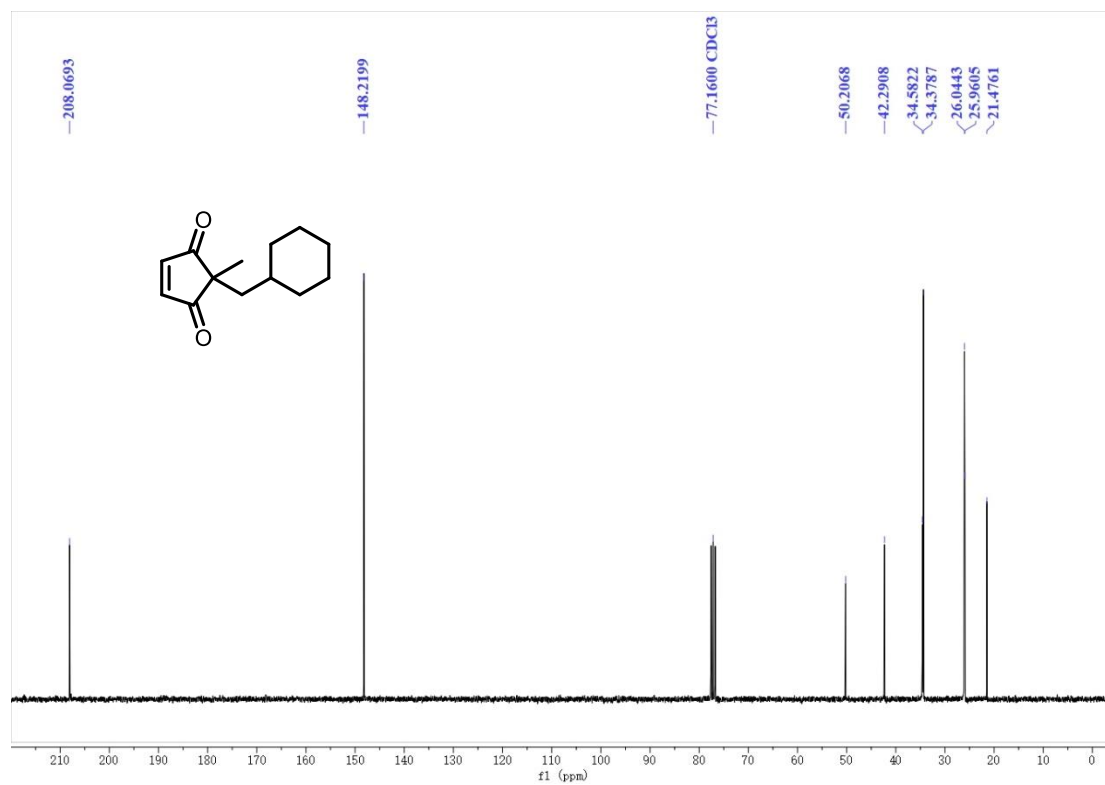

**1t**  $^1\text{H}$  NMR (300 MHz,  $\text{CHCl}_3-d$ )/ $^{13}\text{C}$  NMR (75 MHz,  $\text{CHCl}_3-d$ )

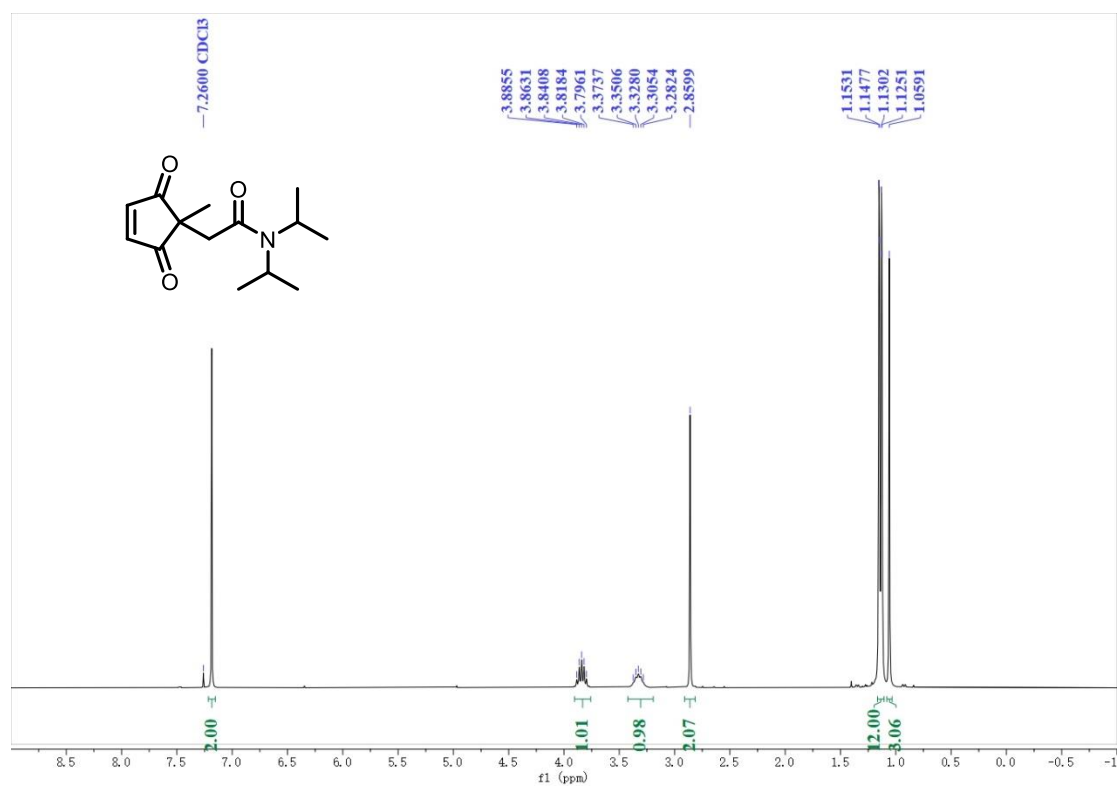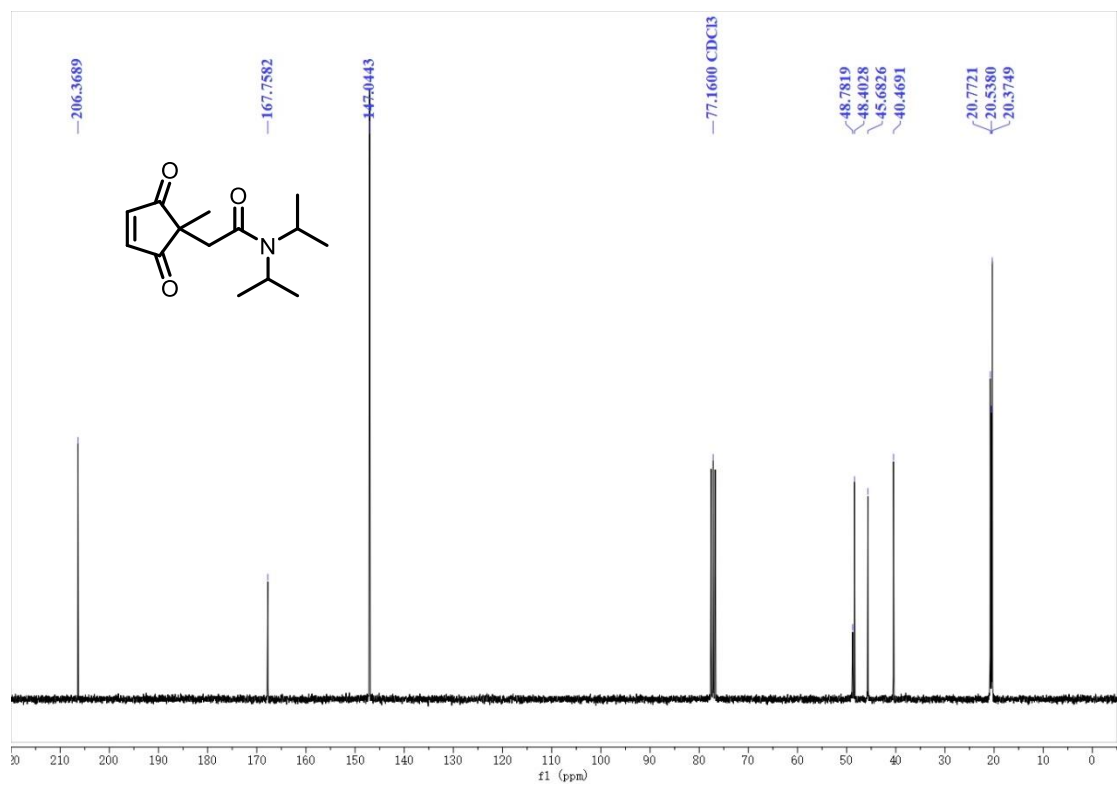



## 10.HPLC Charts

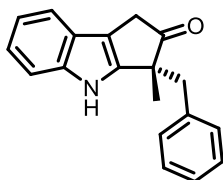

3aa

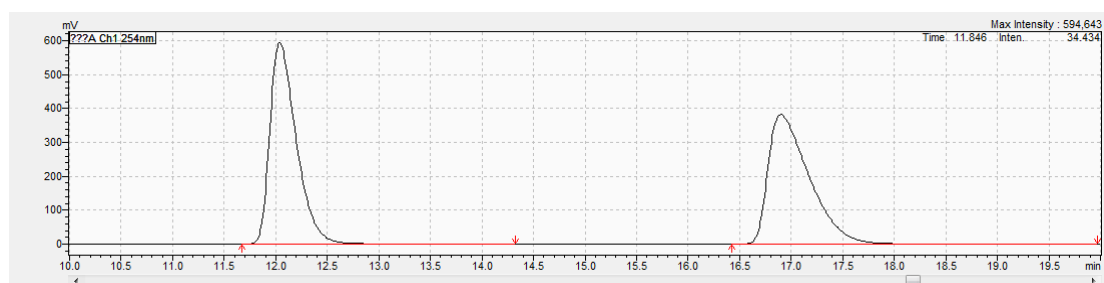

Results View - Peak Table

| Peak# | Ret. Time | Area     | Height | Conc.   | Area%   |
|-------|-----------|----------|--------|---------|---------|
| 1     | 12.038    | 10624513 | 594660 | 50.001  | 50.001  |
| 2     | 16.901    | 10624134 | 382594 | 49.999  | 49.999  |
| Total |           | 21248647 | 977254 | 100.000 | 100.000 |

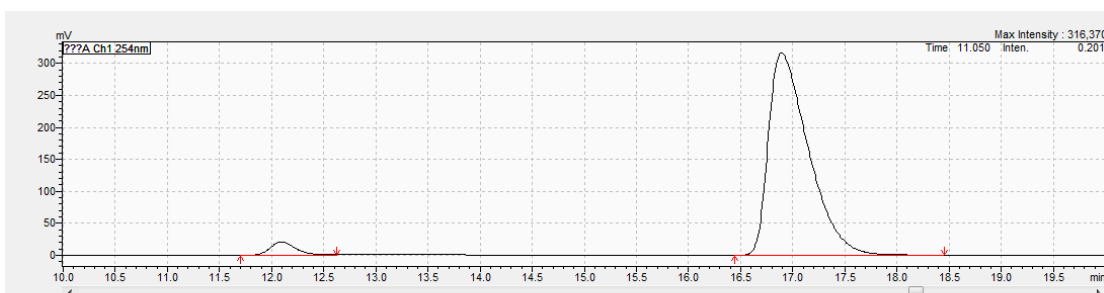

Results View - Peak Table

| Peak# | Ret. Time | Area    | Height | Conc.   | Area%   |
|-------|-----------|---------|--------|---------|---------|
| 1     | 12.094    | 383961  | 20956  | 4.130   | 4.130   |
| 2     | 16.894    | 8449216 | 318298 | 95.870  | 95.870  |
| Total |           | 8813177 | 337252 | 100.000 | 100.000 |

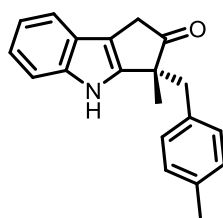

**3ba**

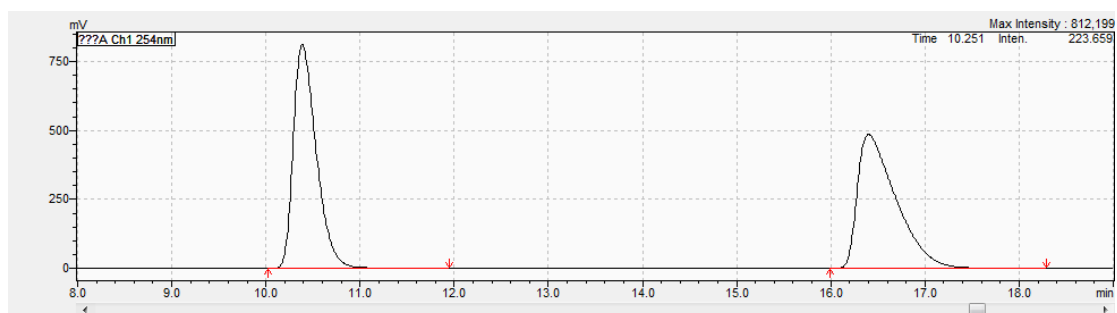

Results View - Peak Table

| Peak# | Ret. Time | Area     | Height  | Conc.   | Area%   |
|-------|-----------|----------|---------|---------|---------|
| 1     | 10.386    | 13781125 | 812195  | 49.916  | 49.916  |
| 2     | 16.400    | 13827385 | 486320  | 50.084  | 50.084  |
| Total |           | 27608509 | 1298515 | 100.000 | 100.000 |

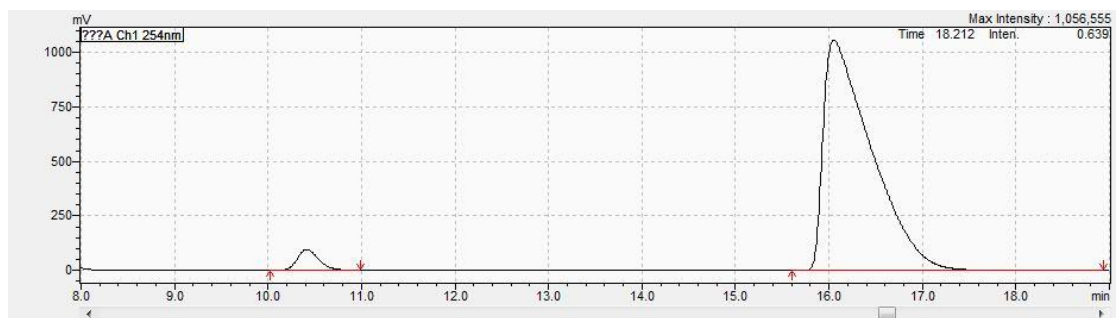

Results View - Peak Table

| Peak# | Ret. Time | Area     | Height  | Conc.   | Area%   |
|-------|-----------|----------|---------|---------|---------|
| 1     | 10.412    | 1569940  | 95556   | 3.983   | 3.983   |
| 2     | 16.052    | 37849943 | 1056590 | 96.017  | 96.017  |
| Total |           | 39419884 | 1152146 | 100.000 | 100.000 |

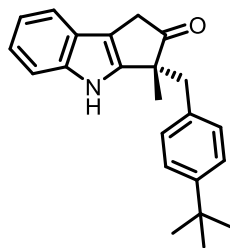

3ca

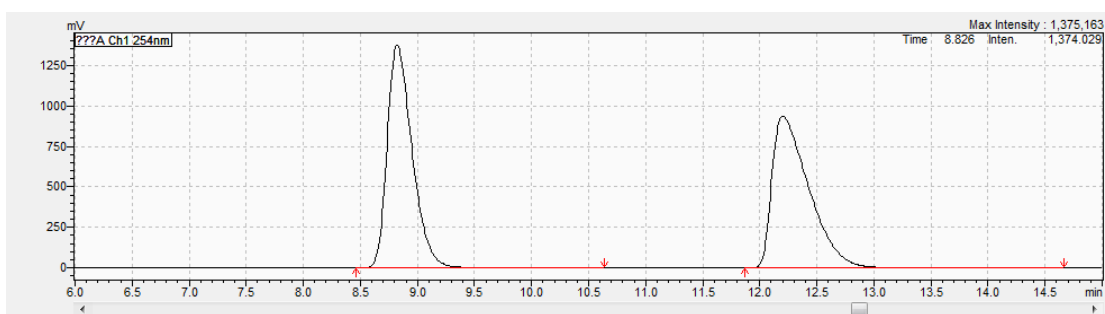

Results View - Peak Table

Peak Table Compound Group Calibration Curve

| Peak# | Ret. Time | Area     | Height  | Conc.   | Area%   |
|-------|-----------|----------|---------|---------|---------|
| 1     | 8.822     | 20928970 | 1375333 | 49.880  | 49.880  |
| 2     | 12.203    | 21029813 | 936993  | 50.120  | 50.120  |
| Total |           | 41958783 | 2312327 | 100.000 | 100.000 |

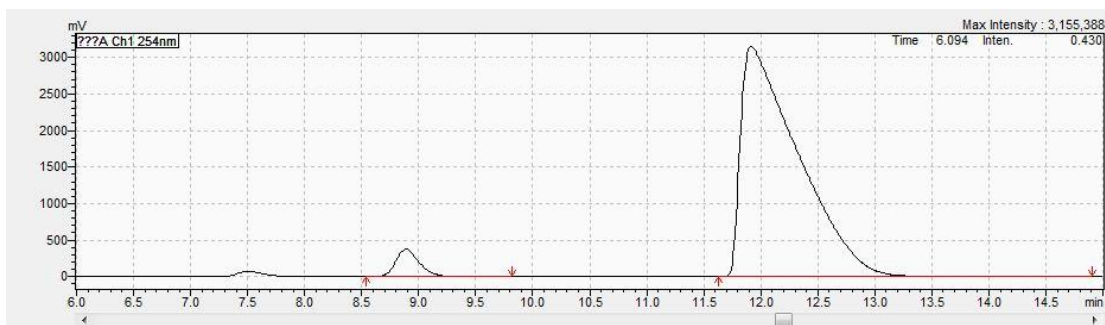

Results View - Peak Table

Peak Table Compound Group Calibration Curve

| Peak# | Ret. Time | Area      | Height  | Conc.   | Area%   |
|-------|-----------|-----------|---------|---------|---------|
| 1     | 8.888     | 5404327   | 374556  | 4.659   | 4.659   |
| 2     | 11.917    | 110590142 | 3155298 | 95.341  | 95.341  |
| Total |           | 115994469 | 3529854 | 100.000 | 100.000 |

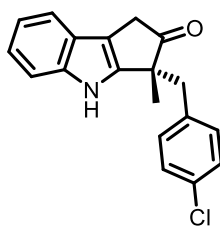

**3da**

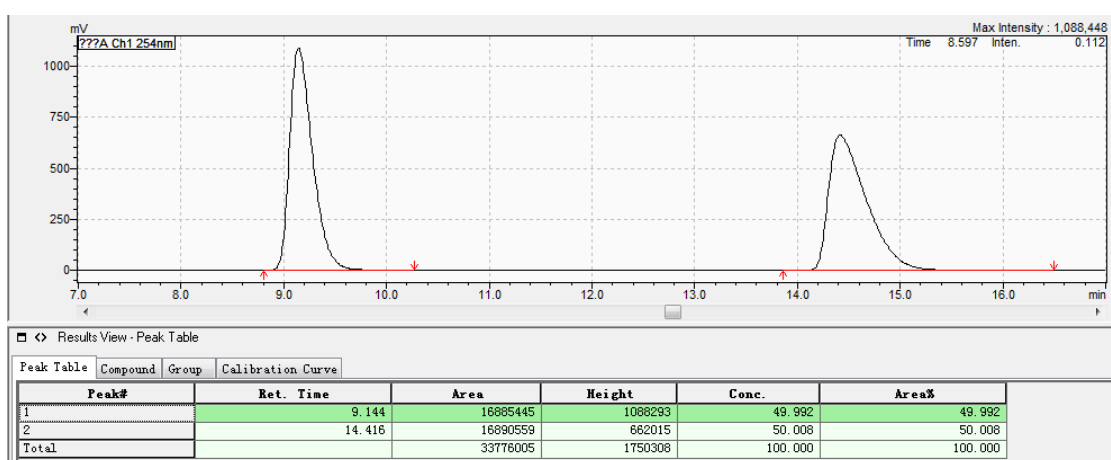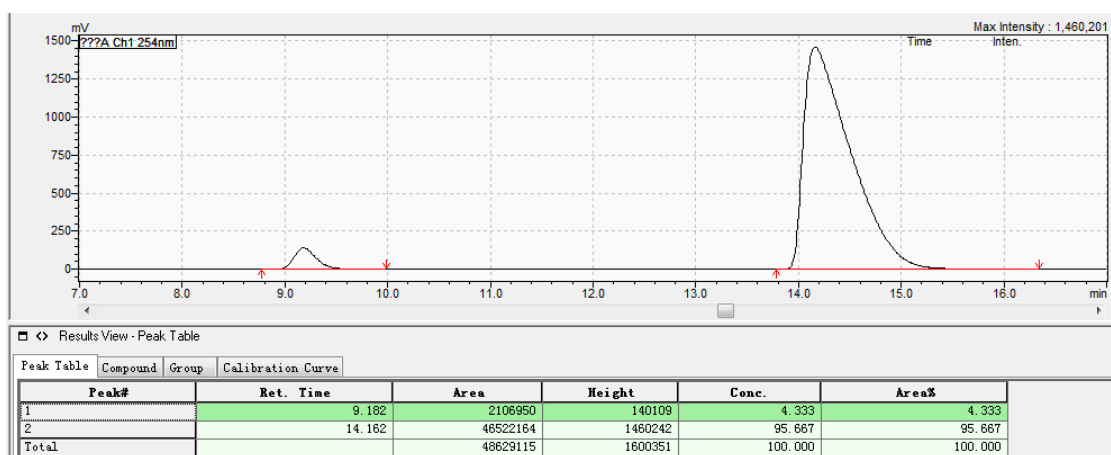

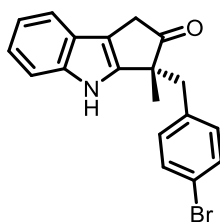

3ea

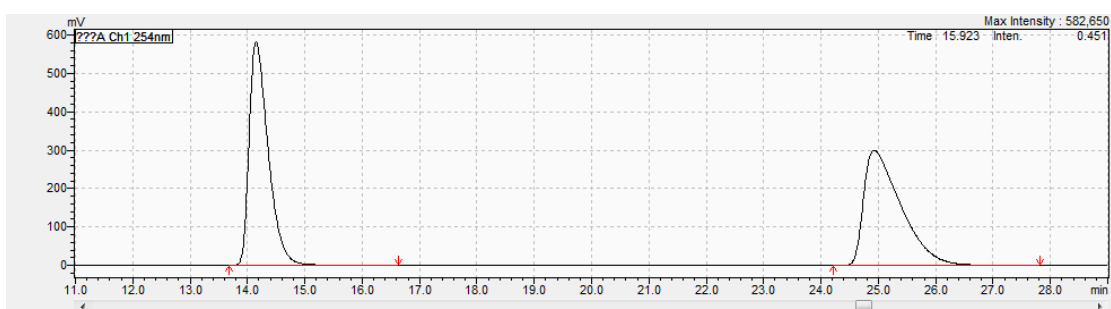

Results View - Peak Table

Peak Table Compound Group Calibration Curve

| Peak# | Ret. Time | Area     | Height | Conc.   | Area%   |
|-------|-----------|----------|--------|---------|---------|
| 1     | 14.151    | 13455291 | 582673 | 50.000  | 50.000  |
| 2     | 24.927    | 13455262 | 299933 | 50.000  | 50.000  |
| Total |           | 26910574 | 882606 | 100.000 | 100.000 |

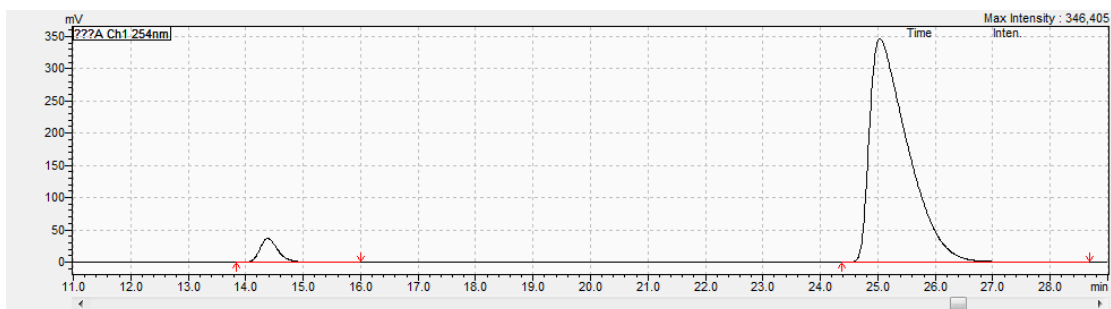

Results View - Peak Table

Peak Table Compound Group Calibration Curve

| Peak# | Ret. Time | Area     | Height | Conc.   | Area%   |
|-------|-----------|----------|--------|---------|---------|
| 1     | 14.383    | 814278   | 37049  | 4.846   | 4.846   |
| 2     | 25.035    | 15988131 | 346696 | 95.154  | 95.154  |
| Total |           | 16802409 | 383745 | 100.000 | 100.000 |

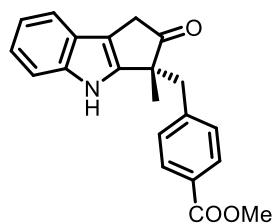

**3fa**

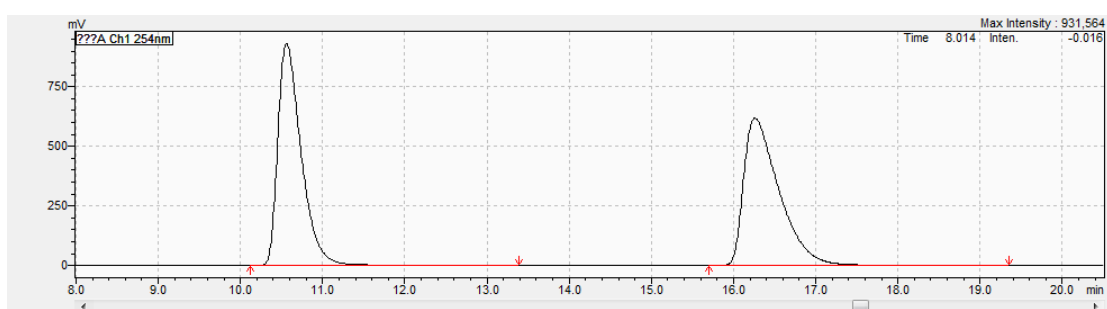

Results View - Peak Table

Peak Table Compound Group Calibration Curve

| Peak# | Ret. Time | Area     | Height  | Conc.   | Area%   |
|-------|-----------|----------|---------|---------|---------|
| 1     | 10.560    | 18438997 | 931802  | 49.883  | 49.883  |
| 2     | 16.259    | 18525671 | 618640  | 50.117  | 50.117  |
| Total |           | 36964668 | 1550241 | 100.000 | 100.000 |

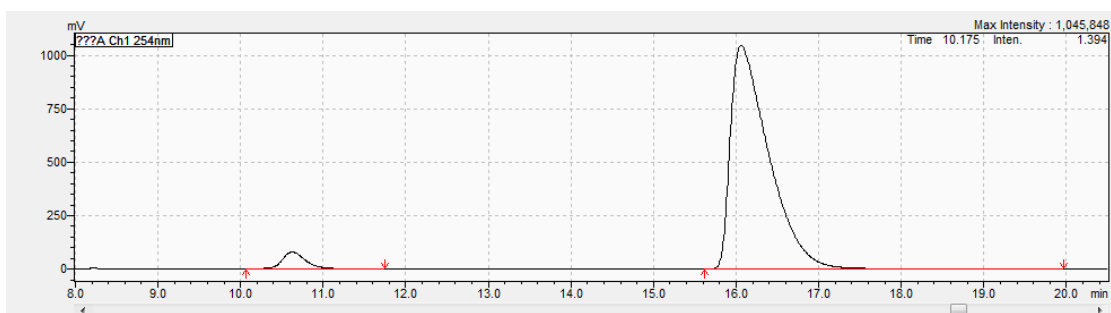

Results View - Peak Table

Peak Table Compound Group Calibration Curve

| Peak# | Ret. Time | Area     | Height  | Conc.   | Area%   |
|-------|-----------|----------|---------|---------|---------|
| 1     | 10.625    | 1825806  | 79874   | 4.597   | 4.597   |
| 2     | 16.061    | 33741781 | 1045900 | 95.403  | 95.403  |
| Total |           | 35367587 | 1125774 | 100.000 | 100.000 |

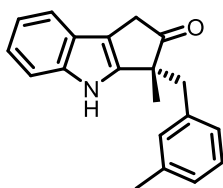

3ga

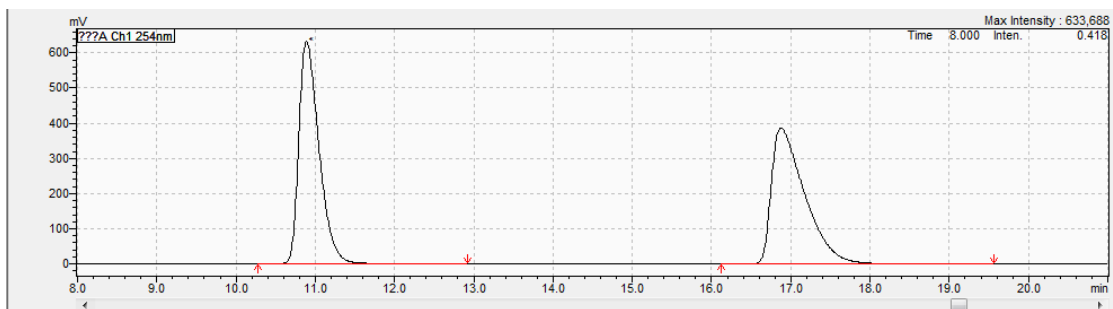

Results View - Peak Table

| Peak# | Ret. Time | Area     | Height  | Conc.   | Area%   |
|-------|-----------|----------|---------|---------|---------|
| 1     | 10.890    | 11258065 | 633688  | 49.920  | 49.920  |
| 2     | 16.878    | 11293978 | 386842  | 50.080  | 50.080  |
| Total |           | 22552043 | 1020510 | 100.000 | 100.000 |

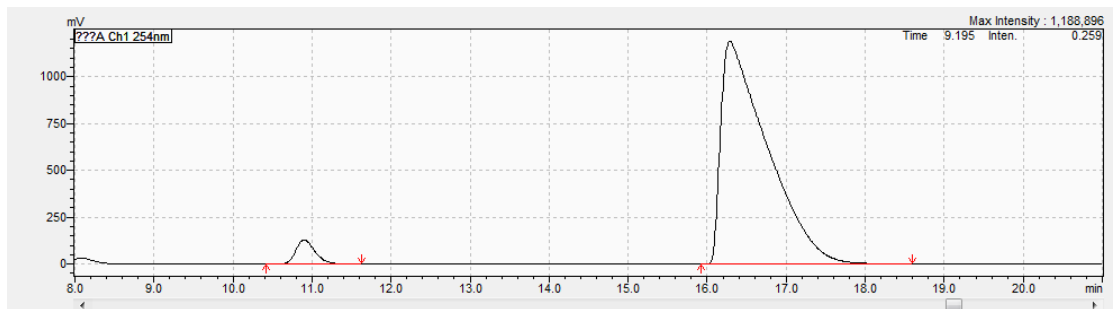

Results View - Peak Table

| Peak# | Ret. Time | Area     | Height  | Conc.   | Area%   |
|-------|-----------|----------|---------|---------|---------|
| 1     | 10.699    | 2175730  | 128915  | 4.277   | 4.277   |
| 2     | 16.287    | 48694843 | 1188784 | 95.723  | 95.723  |
| Total |           | 50870572 | 1317699 | 100.000 | 100.000 |

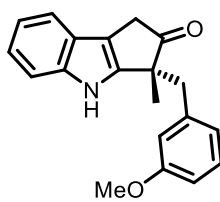

**3ha**

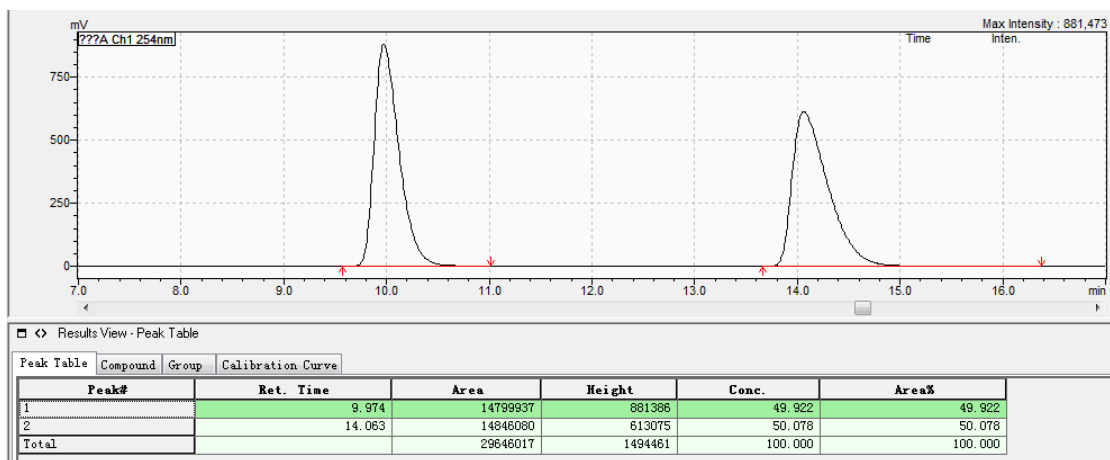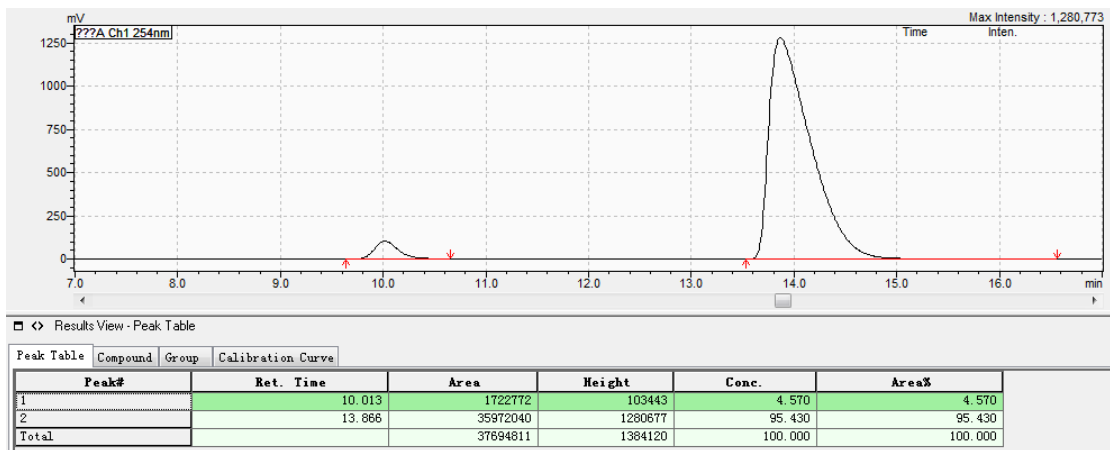



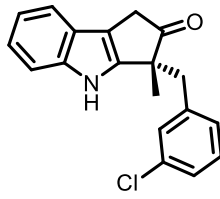

3ia

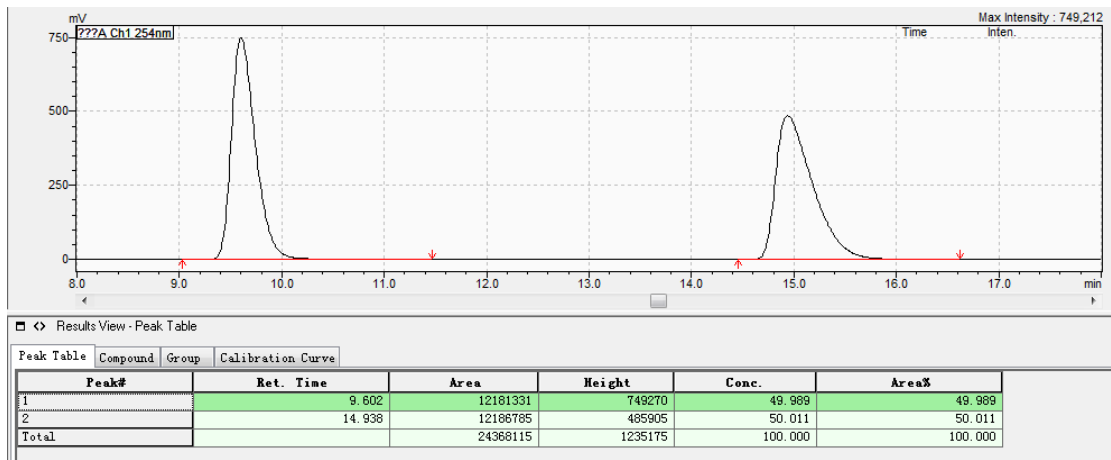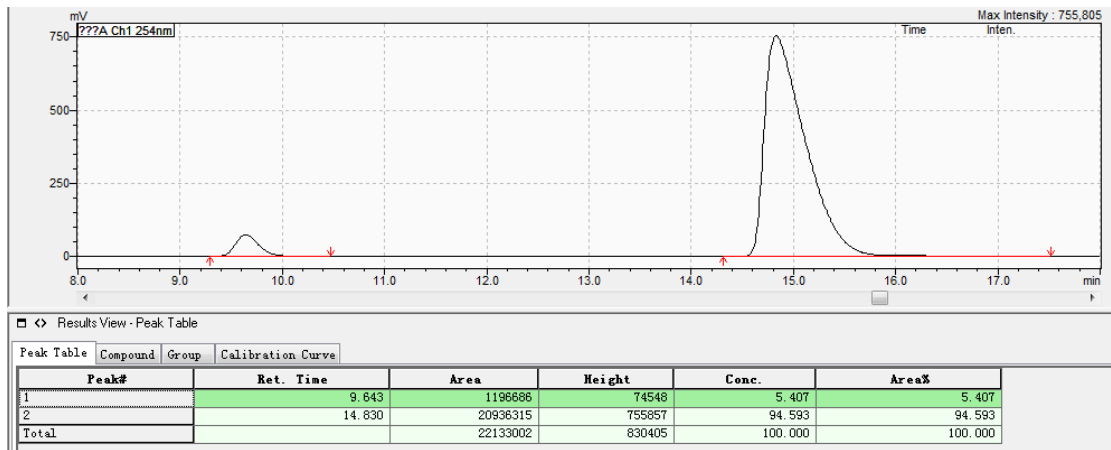

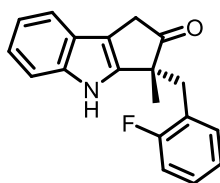

3ja

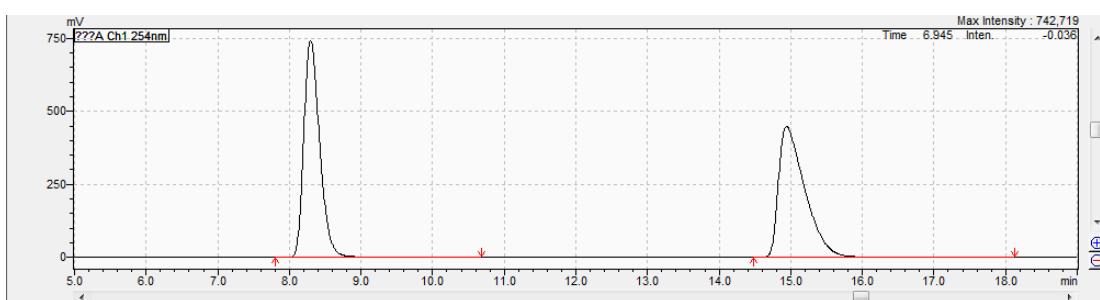

Results View - Peak Table

Peak Table Compound Group Calibration Curve

| Peak# | Ret. Time | Area     | Height  | Conc.   | Area%   |
|-------|-----------|----------|---------|---------|---------|
| 1     | 8.295     | 11442307 | 742862  | 49.918  | 49.918  |
| 2     | 14.943    | 11479832 | 447967  | 50.082  | 50.082  |
| Total |           | 22922139 | 1190829 | 100.000 | 100.000 |

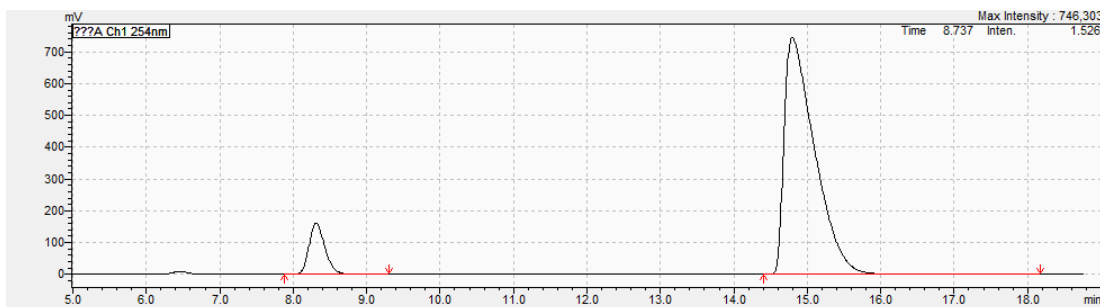

Results View - Peak Table

Peak Table Compound Group Calibration Curve

| Peak# | Ret. Time | Area     | Height | Conc.   | Area%   |
|-------|-----------|----------|--------|---------|---------|
| 1     | 8.313     | 2435907  | 160557 | 10.173  | 10.173  |
| 2     | 14.797    | 21508869 | 746484 | 89.827  | 89.827  |
| Total |           | 23944776 | 907040 | 100.000 | 100.000 |

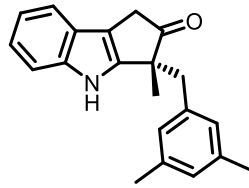

3ka

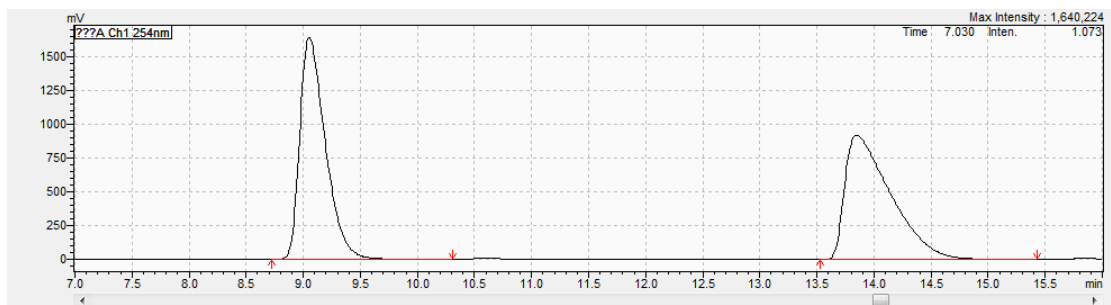

Results View - Peak Table

| Peak# | Ret. Time | Area     | Height  | Conc.   | Area%   |
|-------|-----------|----------|---------|---------|---------|
| 1     | 9.053     | 25577175 | 1639780 | 49.965  | 49.965  |
| 2     | 13.850    | 25812590 | 919415  | 50.035  | 50.035  |
| Total |           | 51189765 | 2559196 | 100.000 | 100.000 |

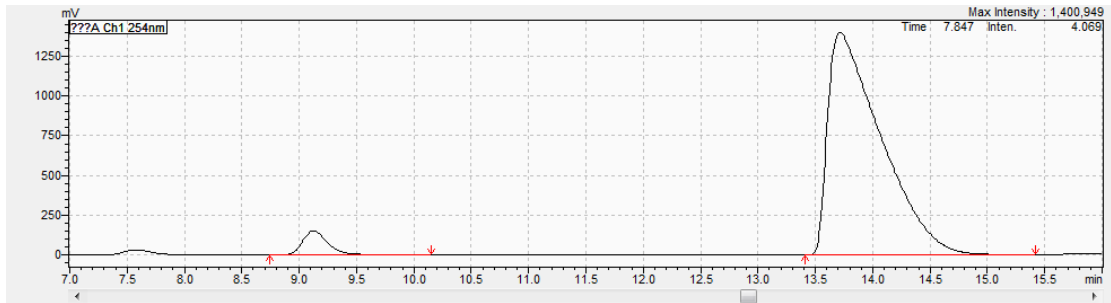

Results View - Peak Table

| Peak# | Ret. Time | Area     | Height  | Conc.   | Area%   |
|-------|-----------|----------|---------|---------|---------|
| 1     | 9.124     | 2354101  | 152322  | 4.949   | 4.949   |
| 2     | 13.715    | 45212707 | 1401332 | 95.051  | 95.051  |
| Total |           | 47566807 | 1553655 | 100.000 | 100.000 |

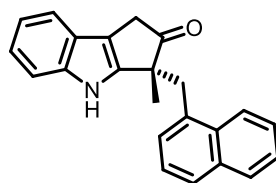

3la

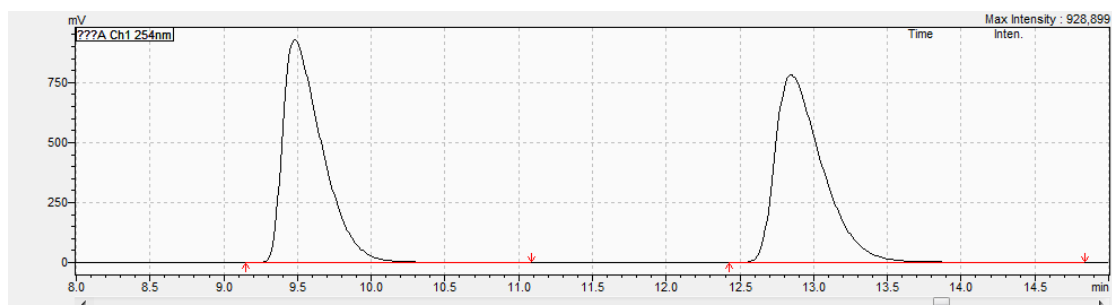

Results View - Peak Table

| Peak# | Ret. Time | Area     | Height  | Conc.   | Area%   |
|-------|-----------|----------|---------|---------|---------|
| 1     | 9.482     | 17239310 | 929442  | 49.631  | 49.631  |
| 2     | 12.846    | 17495428 | 783021  | 50.369  | 50.369  |
| Total |           | 34734738 | 1712463 | 100.000 | 100.000 |

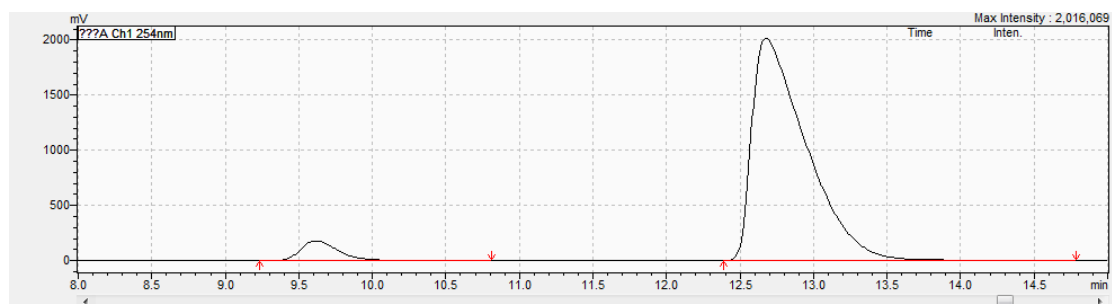

Results View - Peak Table

| Peak# | Ret. Time | Area     | Height  | Conc.   | Area%   |
|-------|-----------|----------|---------|---------|---------|
| 1     | 9.617     | 3138251  | 178361  | 5.718   | 5.718   |
| 2     | 12.678    | 51709909 | 2015230 | 94.282  | 94.282  |
| Total |           | 54848160 | 2193591 | 100.000 | 100.000 |

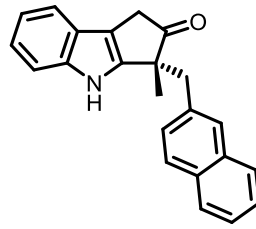

**3ma**

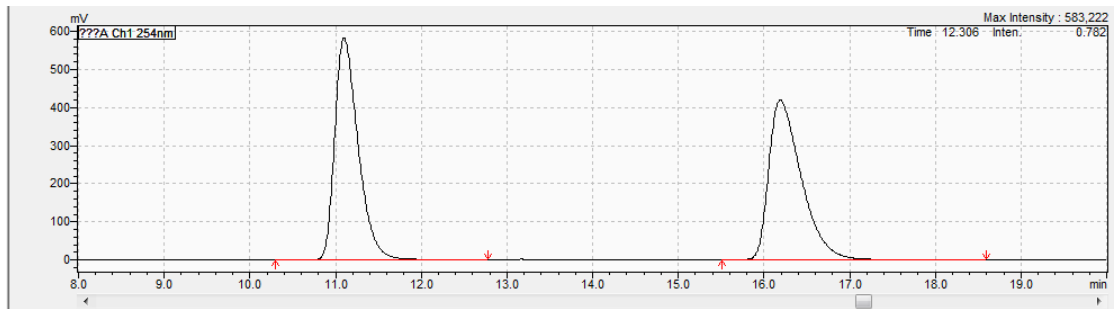

Results View - Peak Table

Peak Table Compound Group Calibration Curve

| Peak# | Ret. Time | Area     | Height  | Conc.   | Area%   |
|-------|-----------|----------|---------|---------|---------|
| 1     | 11.099    | 11110082 | 583206  | 49.934  | 49.934  |
| 2     | 16.191    | 11139471 | 420089  | 50.066  | 50.066  |
| Total |           | 22249553 | 1003295 | 100.000 | 100.000 |

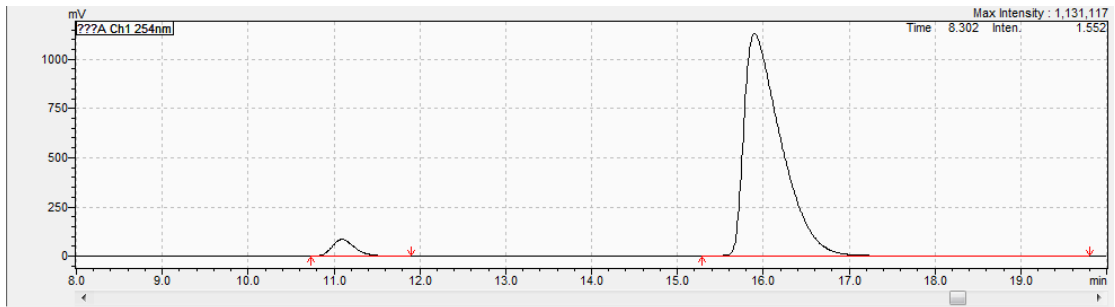

Results View - Peak Table

Peak Table Compound Group Calibration Curve

| Peak# | Ret. Time | Area     | Height  | Conc.   | Area%   |
|-------|-----------|----------|---------|---------|---------|
| 1     | 11.092    | 1610606  | 85795   | 4.530   | 4.530   |
| 2     | 15.899    | 33945954 | 1131127 | 95.470  | 95.470  |
| Total |           | 35556561 | 1216922 | 100.000 | 100.000 |

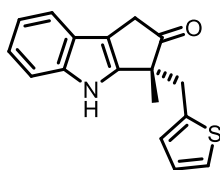

**3na**

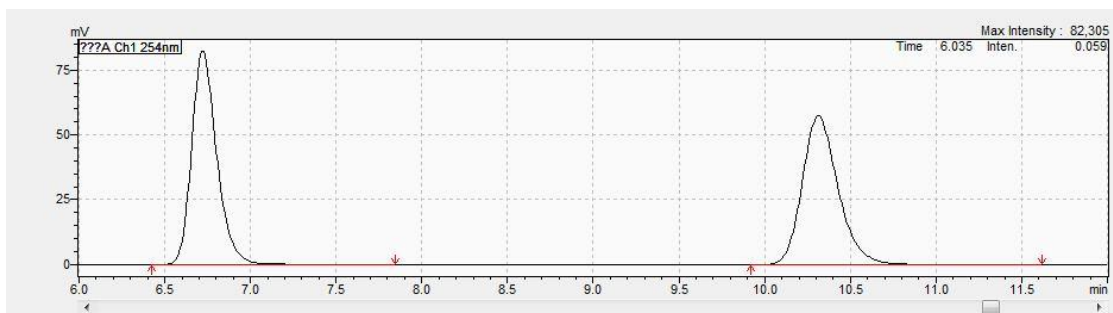

Results View - Peak Table

| Peak# | Ret. Time | Area    | Height | Conc.   | Area%   |
|-------|-----------|---------|--------|---------|---------|
| 1     | 6.721     | 841909  | 82424  | 50.117  | 50.117  |
| 2     | 10.312    | 837980  | 57362  | 49.883  | 49.883  |
| Total |           | 1679889 | 139786 | 100.000 | 100.000 |

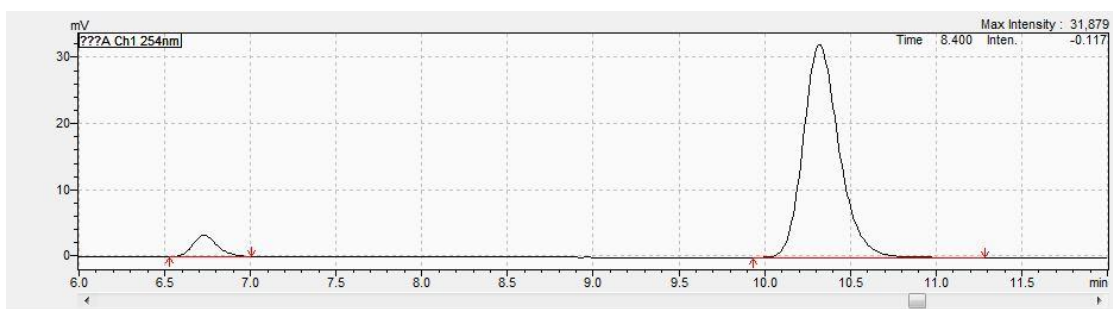

Results View - Peak Table

| Peak# | Ret. Time | Area   | Height | Conc.   | Area%   |
|-------|-----------|--------|--------|---------|---------|
| 1     | 6.727     | 32039  | 3221   | 6.410   | 6.410   |
| 2     | 10.320    | 487795 | 32102  | 93.590  | 93.590  |
| Total |           | 499834 | 35324  | 100.000 | 100.000 |

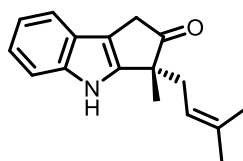

30a

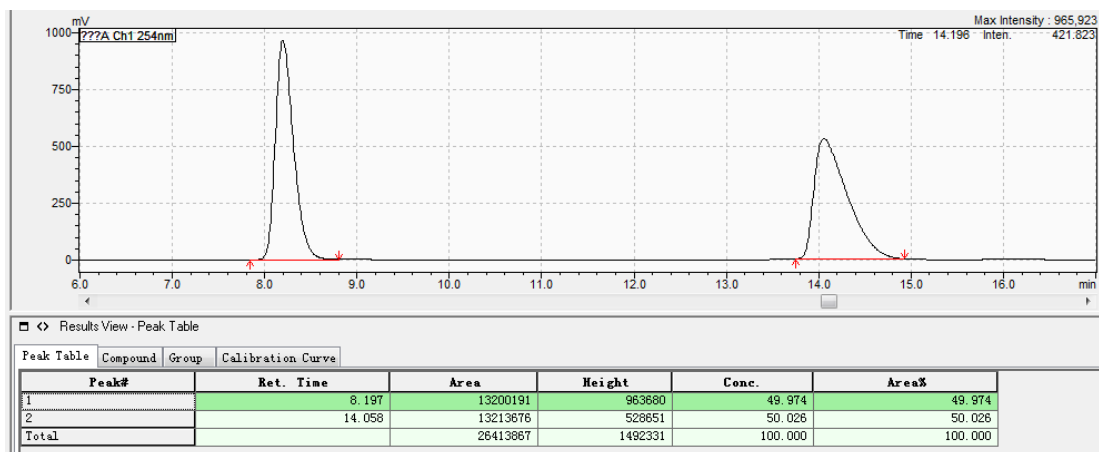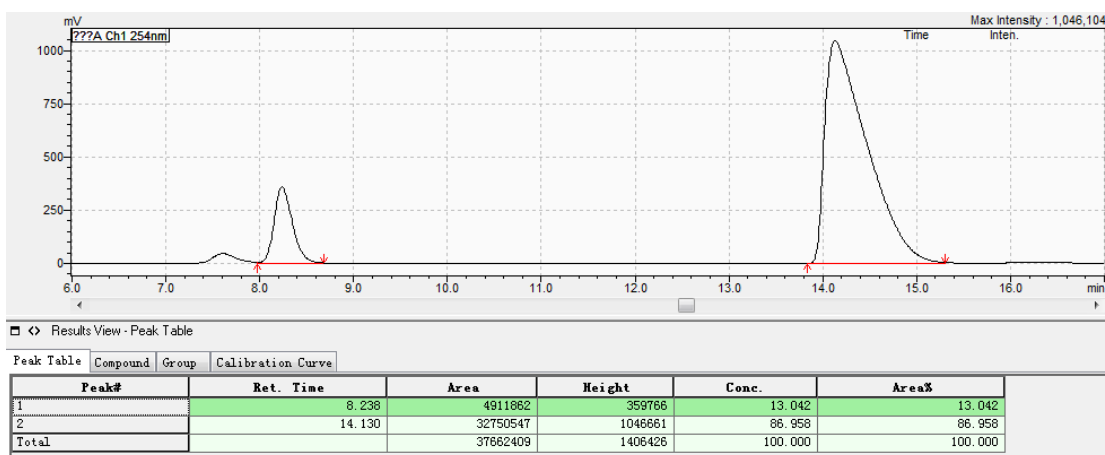

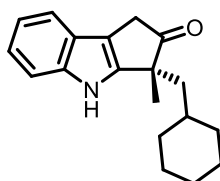

3pa

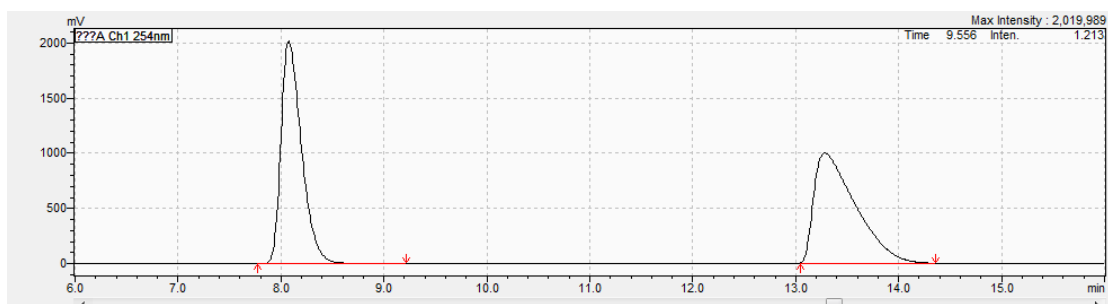

Results View - Peak Table

| Peak# | Ret. Time | Area     | Height  | Conc.   | Area%   |
|-------|-----------|----------|---------|---------|---------|
| 1     | 8.076     | 27957956 | 2019732 | 49.996  | 49.996  |
| 2     | 13.284    | 27962782 | 998152  | 50.004  | 50.004  |
| Total |           | 55920738 | 3017884 | 100.000 | 100.000 |

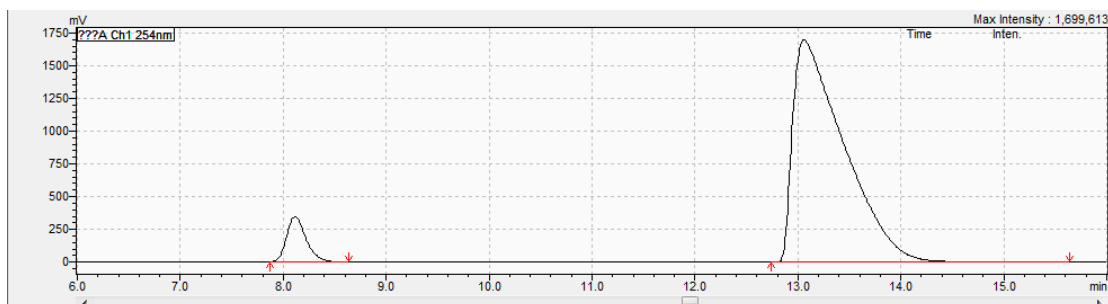

Results View - Peak Table

| Peak# | Ret. Time | Area     | Height  | Conc.   | Area%   |
|-------|-----------|----------|---------|---------|---------|
| 1     | 8.114     | 4572337  | 345635  | 7.225   | 7.225   |
| 2     | 13.060    | 58710030 | 1699638 | 92.775  | 92.775  |
| Total |           | 63282367 | 2045273 | 100.000 | 100.000 |



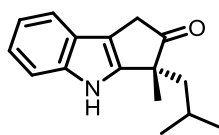

3qa

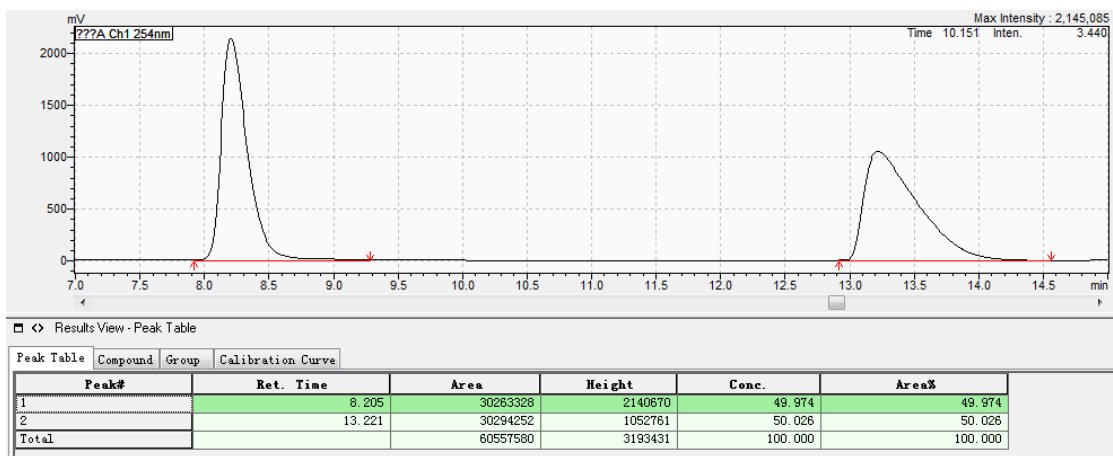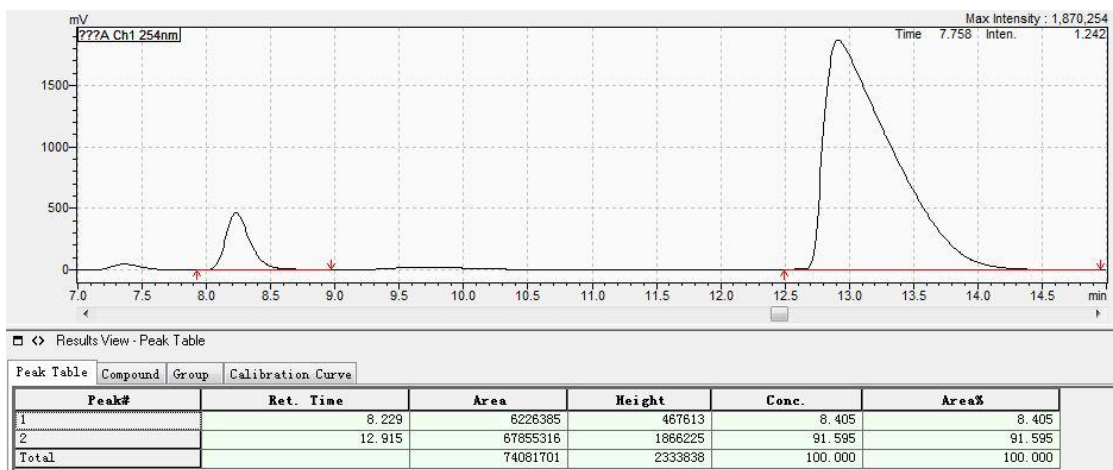

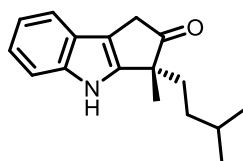

3ra

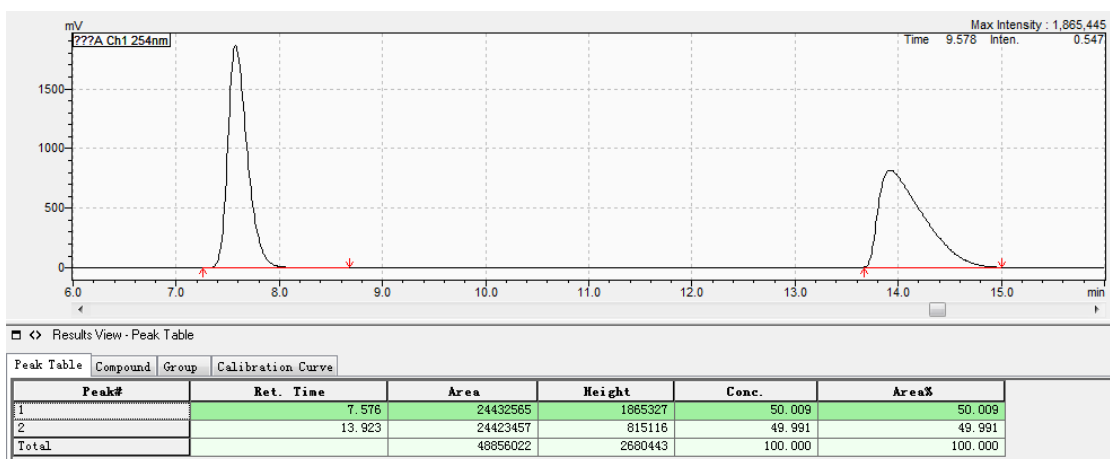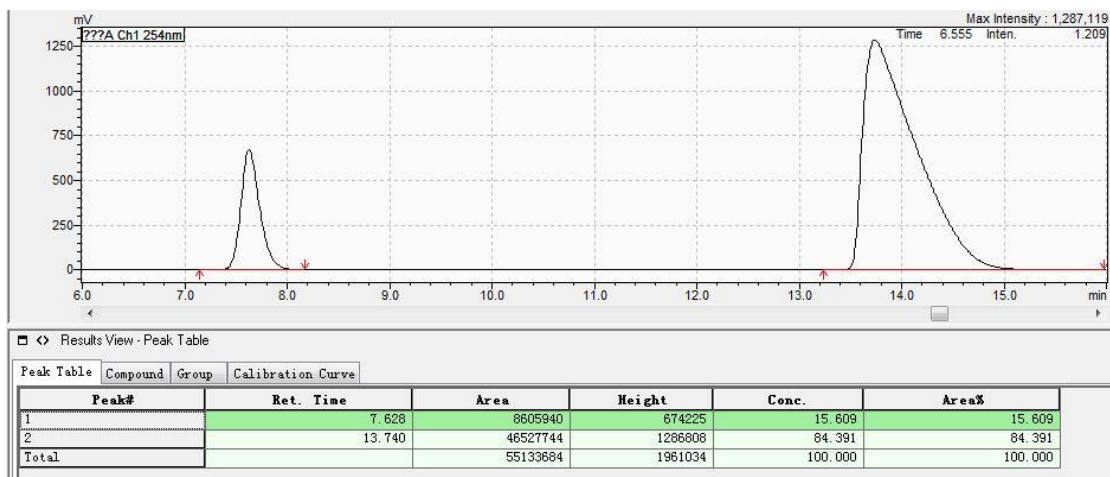

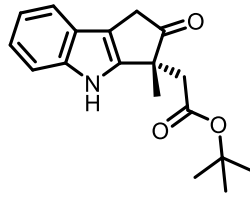

3sa

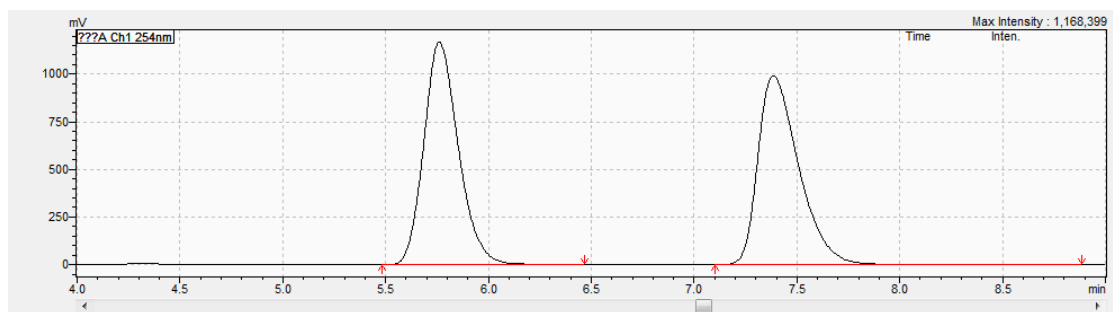

Results View - Peak Table

| Peak# | Ret. Time | Area     | Height  | Conc.   | Area%   |
|-------|-----------|----------|---------|---------|---------|
| 1     | 5.761     | 13836170 | 1187830 | 50.008  | 50.008  |
| 2     | 7.385     | 13631772 | 991705  | 49.992  | 49.992  |
| Total |           | 27267943 | 2159535 | 100.000 | 100.000 |

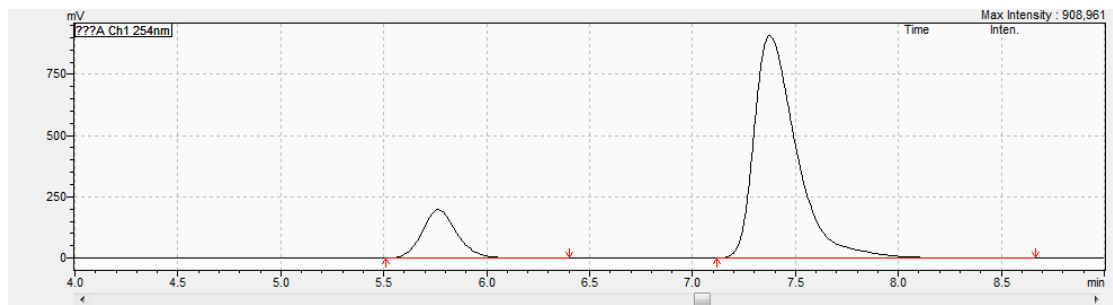

Results View - Peak Table

| Peak# | Ret. Time | Area     | Height  | Conc.   | Area%   |
|-------|-----------|----------|---------|---------|---------|
| 1     | 5.784     | 2284346  | 196740  | 15.023  | 15.023  |
| 2     | 7.375     | 12921780 | 908659  | 84.977  | 84.977  |
| Total |           | 15206127 | 1105400 | 100.000 | 100.000 |

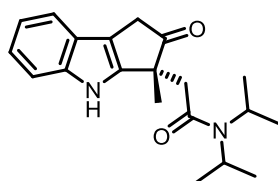

3ta

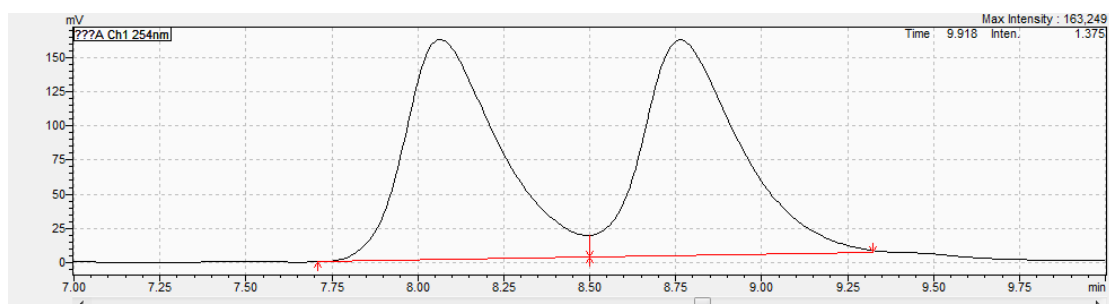

Results View - Peak Table

Peak Table Compound Group Calibration Curve

| Peak# | Ret. Time | Area    | Height | Conc.   | Area%   |
|-------|-----------|---------|--------|---------|---------|
| 1     | 8.065     | 3094860 | 161309 | 49.763  | 49.763  |
| 2     | 8.764     | 3124335 | 158037 | 50.237  | 50.237  |
| Total |           | 6219196 | 319346 | 100.000 | 100.000 |

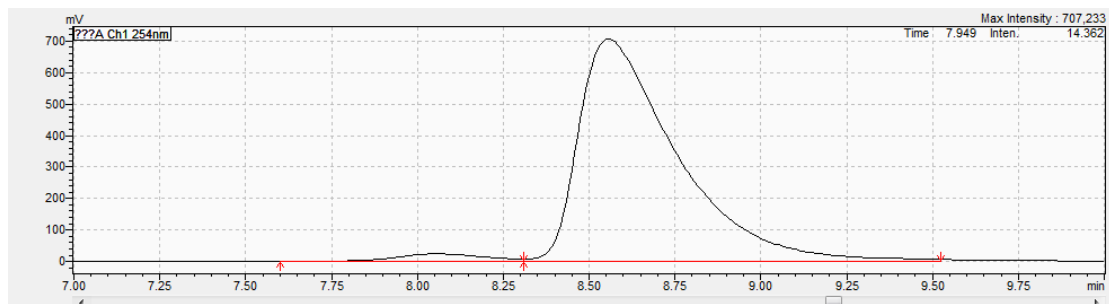

Results View - Peak Table

Peak Table Compound Group Calibration Curve

| Peak# | Ret. Time | Area     | Height | Conc.   | Area%   |
|-------|-----------|----------|--------|---------|---------|
| 1     | 8.057     | 428186   | 23820  | 2.978   | 2.978   |
| 2     | 8.556     | 13952085 | 706239 | 97.022  | 97.022  |
| Total |           | 14380271 | 730059 | 100.000 | 100.000 |

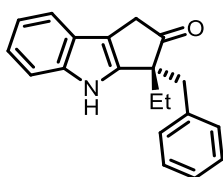

3ua

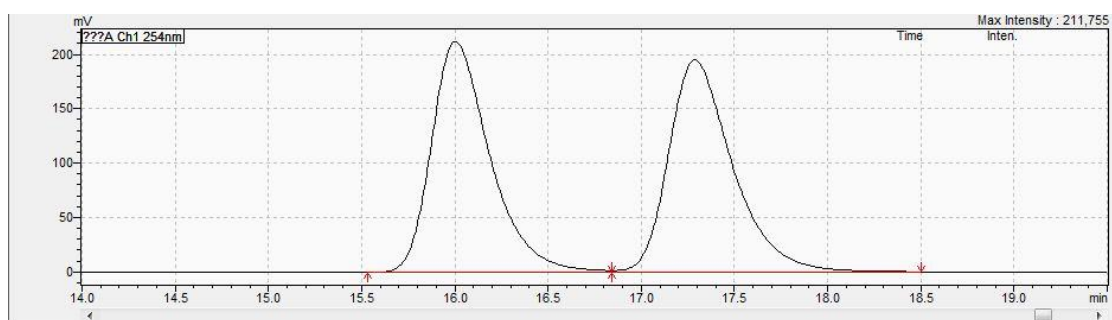

Results View - Peak Table

| Peak# | Ret. Time | Area    | Height | Conc.   | Area%   |
|-------|-----------|---------|--------|---------|---------|
| 1     | 16.004    | 4630872 | 211999 | 49.896  | 49.896  |
| 2     | 17.287    | 4650182 | 194681 | 50.104  | 50.104  |
| Total |           | 9281055 | 406680 | 100.000 | 100.000 |

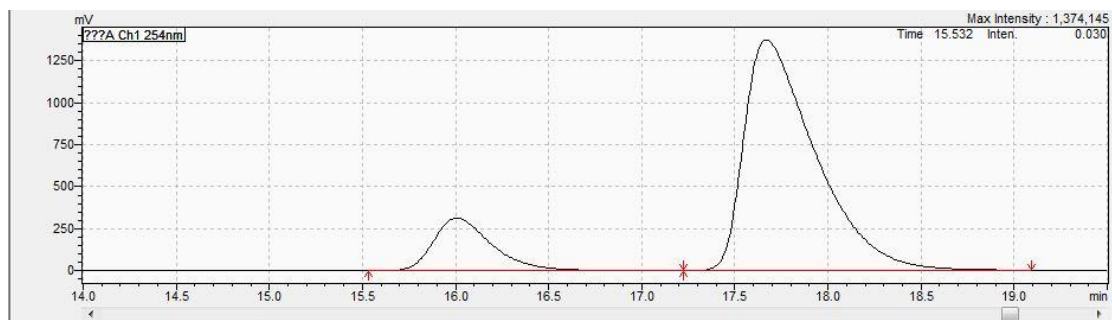

Results View - Peak Table

| Peak# | Ret. Time | Area     | Height  | Conc.   | Area%   |
|-------|-----------|----------|---------|---------|---------|
| 1     | 16.008    | 6781977  | 313854  | 15.615  | 15.615  |
| 2     | 17.669    | 36649665 | 1373479 | 84.385  | 84.385  |
| Total |           | 43431642 | 1687334 | 100.000 | 100.000 |

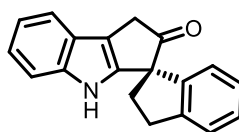

3va

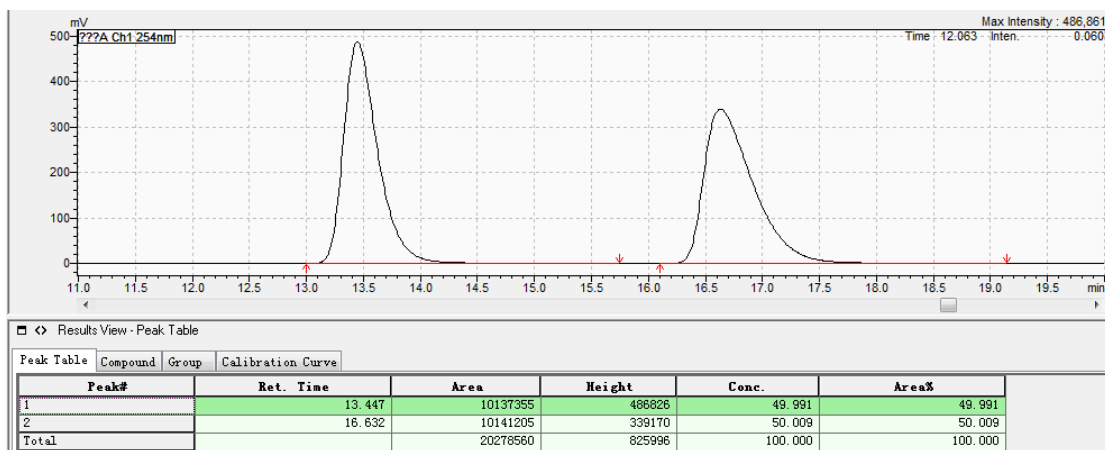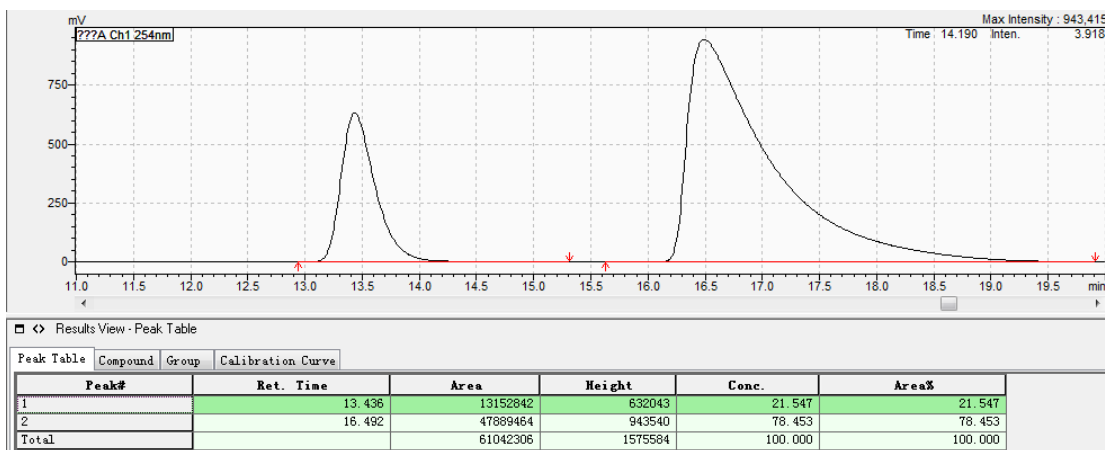

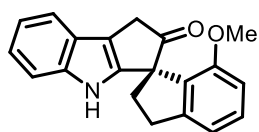

3wa

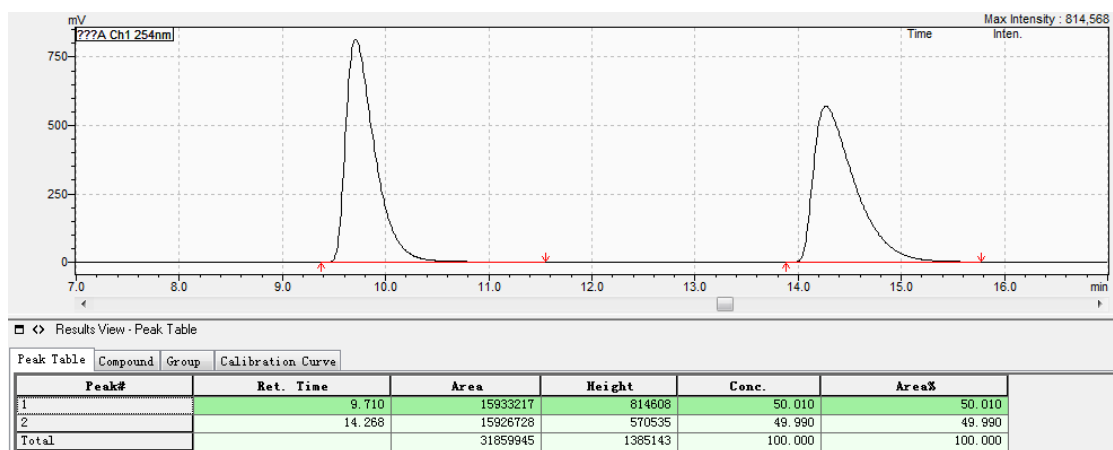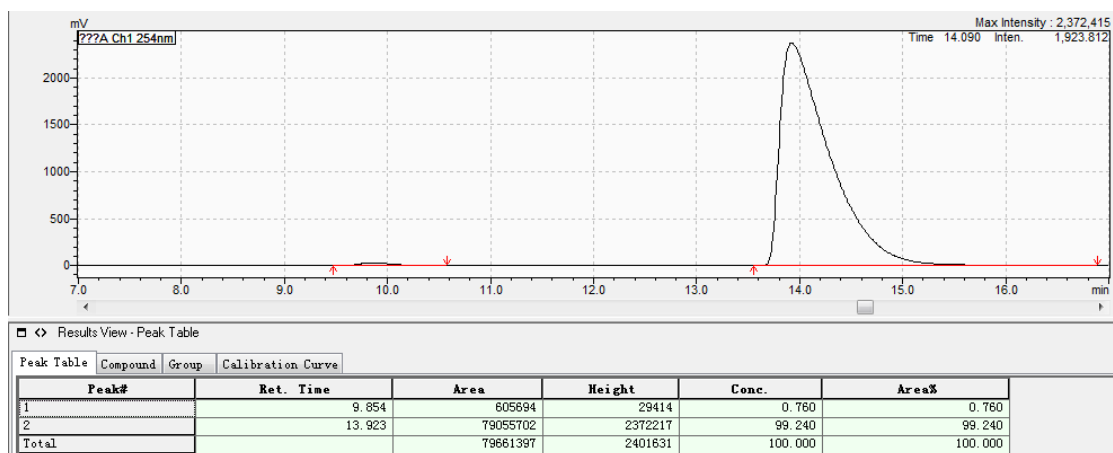

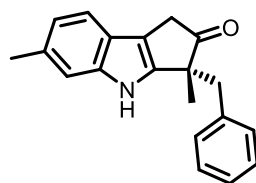

**3ab**

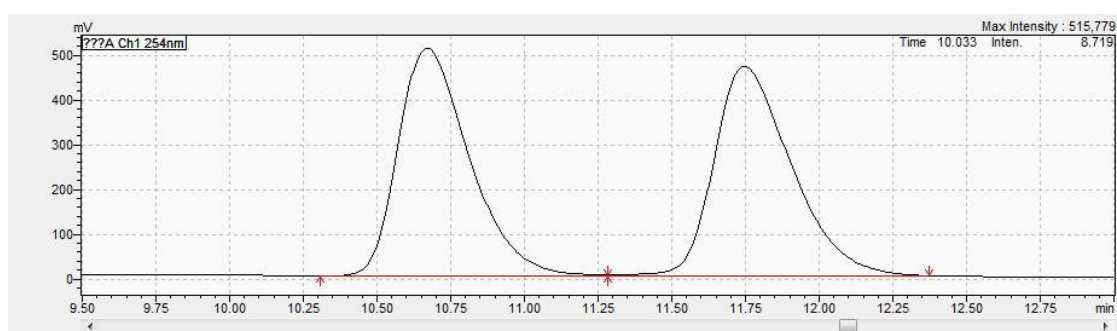

Results View - Peak Table

Peak Table Compound Group Calibration Curve

| Peak# | Ret. Time | Area     | Height | Conc.   | Area%   |
|-------|-----------|----------|--------|---------|---------|
| 1     | 10.669    | 8513331  | 508544 | 49.910  | 49.910  |
| 2     | 11.747    | 8543949  | 467522 | 50.090  | 50.090  |
| Total |           | 17057280 | 976066 | 100.000 | 100.000 |

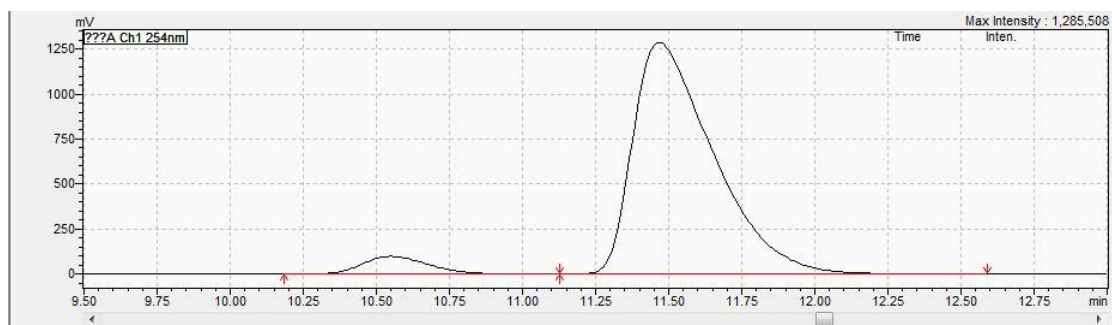

Results View - Peak Table

Peak Table Compound Group Calibration Curve

| Peak# | Ret. Time | Area     | Height  | Conc.   | Area%   |
|-------|-----------|----------|---------|---------|---------|
| 1     | 10.552    | 1544949  | 98593   | 5.916   | 5.916   |
| 2     | 11.467    | 24570229 | 1283976 | 94.084  | 94.084  |
| Total |           | 26115178 | 1382569 | 100.000 | 100.000 |



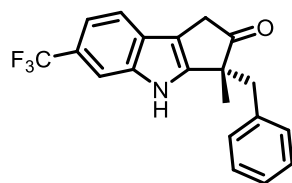

**3ac**

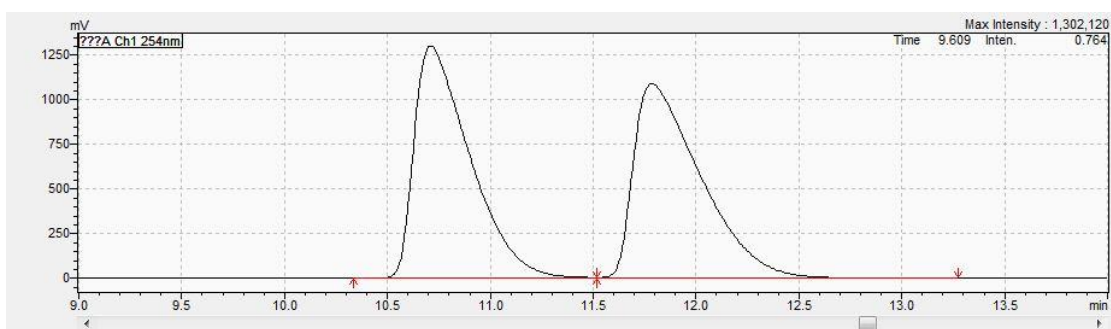

Results View - Peak Table

Peak Table Compound Group Calibration Curve

| Peak# | Ret. Time | Area     | Height  | Conc.   | Area%   |
|-------|-----------|----------|---------|---------|---------|
| 1     | 10.710    | 24580955 | 1301377 | 49.900  | 49.900  |
| 2     | 11.786    | 24679234 | 1090882 | 50.100  | 50.100  |
| Total |           | 49260189 | 2392259 | 100.000 | 100.000 |

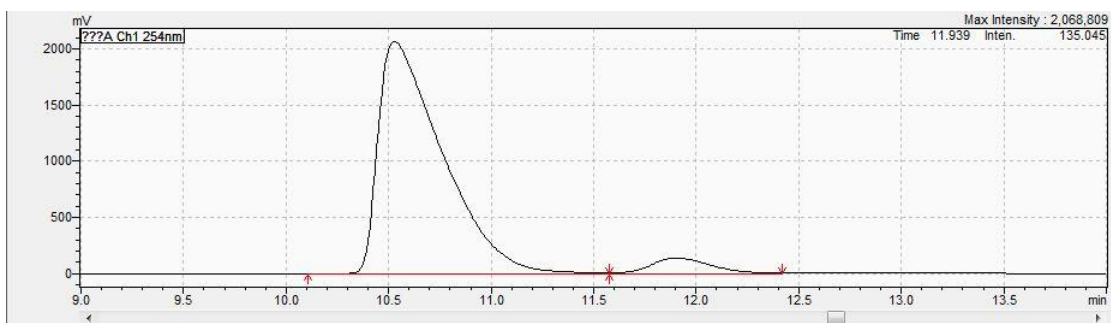

Results View - Peak Table

Peak Table Compound Group Calibration Curve

| Peak# | Ret. Time | Area     | Height  | Conc.   | Area%   |
|-------|-----------|----------|---------|---------|---------|
| 1     | 10.528    | 44886380 | 2068096 | 94.023  | 94.023  |
| 2     | 11.903    | 2853527  | 139529  | 5.977   | 5.977   |
| Total |           | 47739907 | 2207625 | 100.000 | 100.000 |

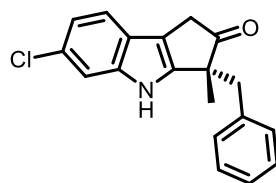

**3ad**

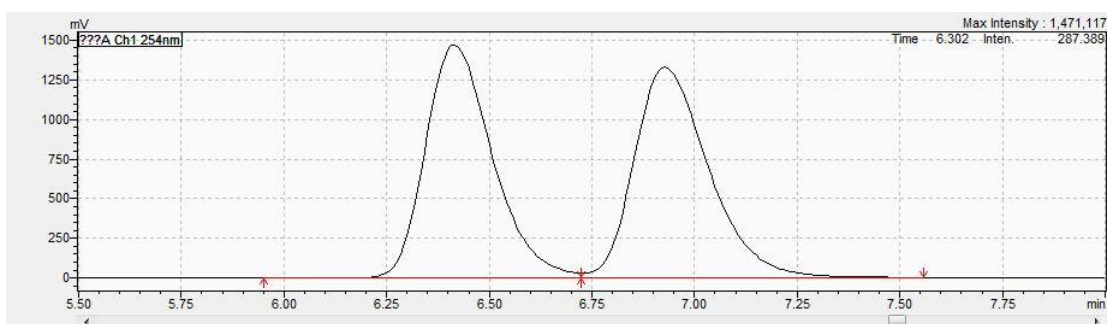

Results View - Peak Table

| Peak# | Ret. Time | Area     | Height  | Conc.   | Area%   |
|-------|-----------|----------|---------|---------|---------|
| 1     | 6.415     | 16619033 | 1469469 | 49.897  | 49.897  |
| 2     | 6.929     | 16687903 | 1325676 | 50.103  | 50.103  |
| Total |           | 33306936 | 2795144 | 100.000 | 100.000 |

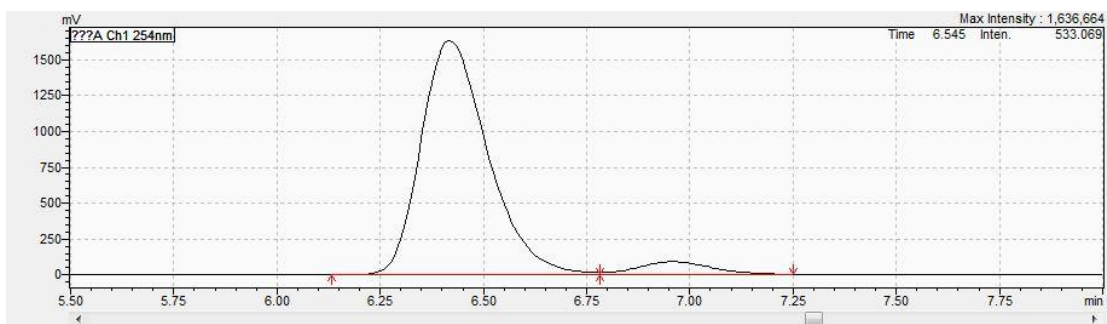

Results View - Peak Table

| Peak# | Ret. Time | Area     | Height  | Conc.   | Area%   |
|-------|-----------|----------|---------|---------|---------|
| 1     | 6.418     | 18431811 | 1835919 | 94.058  | 94.058  |
| 2     | 6.957     | 1164308  | 90944   | 5.942   | 5.942   |
| Total |           | 19596119 | 1726863 | 100.000 | 100.000 |

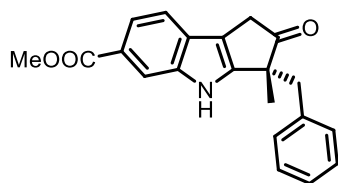

3ae

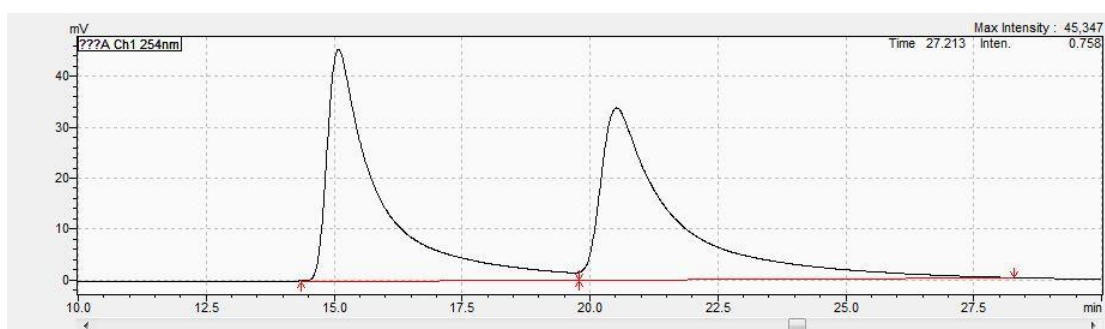

Results View - Peak Table

Peak Table Compound Group Calibration Curve

| Peak# | Ret. Time | Area    | Height | Conc.   | Area%   |
|-------|-----------|---------|--------|---------|---------|
| 1     | 15.085    | 3245918 | 45548  | 49.648  | 49.648  |
| 2     | 20.521    | 3292009 | 33768  | 50.352  | 50.352  |
| Total |           | 6537928 | 79315  | 100.000 | 100.000 |

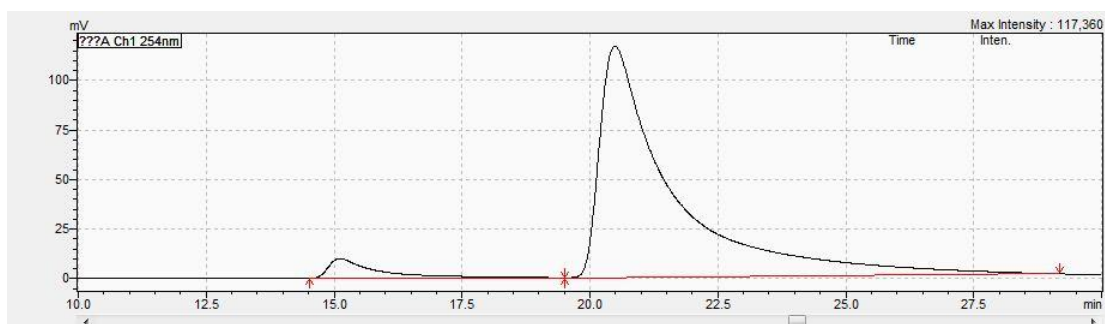

Results View - Peak Table

Peak Table Compound Group Calibration Curve

| Peak# | Ret. Time | Area     | Height | Conc.   | Area%   |
|-------|-----------|----------|--------|---------|---------|
| 1     | 15.110    | 659865   | 10037  | 5.397   | 5.397   |
| 2     | 20.490    | 11566112 | 116723 | 94.603  | 94.603  |
| Total |           | 12225977 | 126761 | 100.000 | 100.000 |

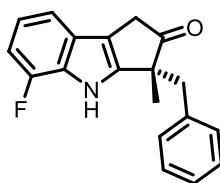

3af

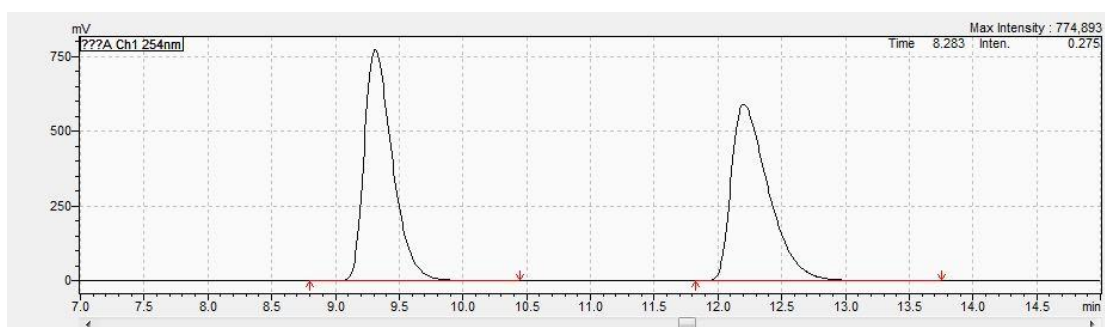

Results View - Peak Table

| Peak# | Ret. Time | Area     | Height  | Conc.   | Area%   |
|-------|-----------|----------|---------|---------|---------|
| 1     | 9.311     | 11964639 | 774815  | 49.890  | 49.890  |
| 2     | 12.203    | 12017618 | 590387  | 50.110  | 50.110  |
| Total |           | 23982257 | 1365202 | 100.000 | 100.000 |

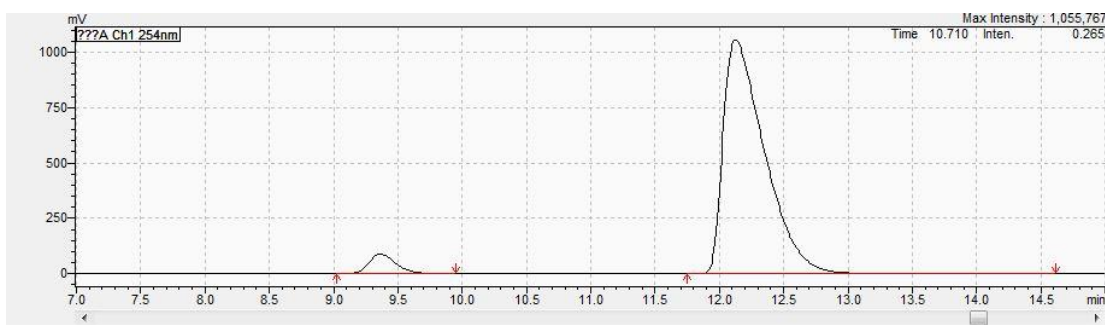

Results View - Peak Table

| Peak# | Ret. Time | Area     | Height  | Conc.   | Area%   |
|-------|-----------|----------|---------|---------|---------|
| 1     | 9.365     | 1317038  | 89190   | 5.261   | 5.261   |
| 2     | 12.126    | 23716638 | 1055818 | 94.739  | 94.739  |
| Total |           | 25033675 | 1145009 | 100.000 | 100.000 |

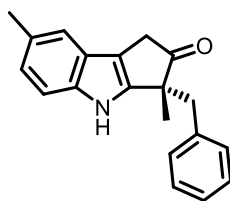

3ag

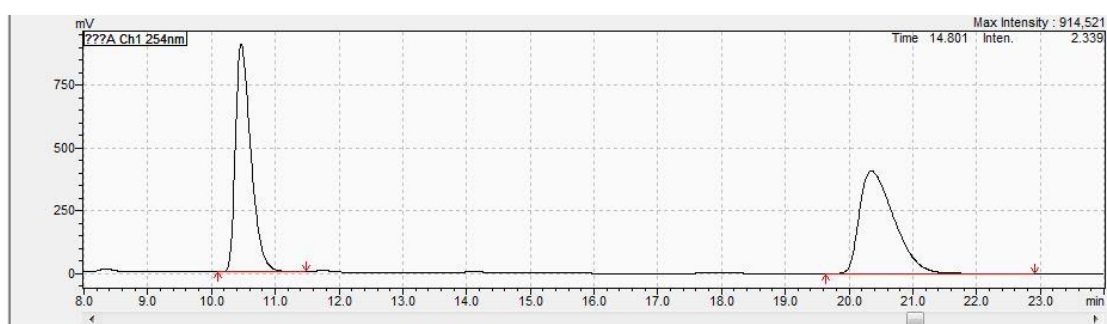

Results View - Peak Table

| Peak# | Ret. Time | Area     | Height  | Conc.   | Area%   |
|-------|-----------|----------|---------|---------|---------|
| 1     | 10.467    | 15342429 | 907885  | 50.010  | 50.010  |
| 2     | 20.350    | 15336099 | 408045  | 49.990  | 49.990  |
| Total |           | 30678528 | 1315929 | 100.000 | 100.000 |

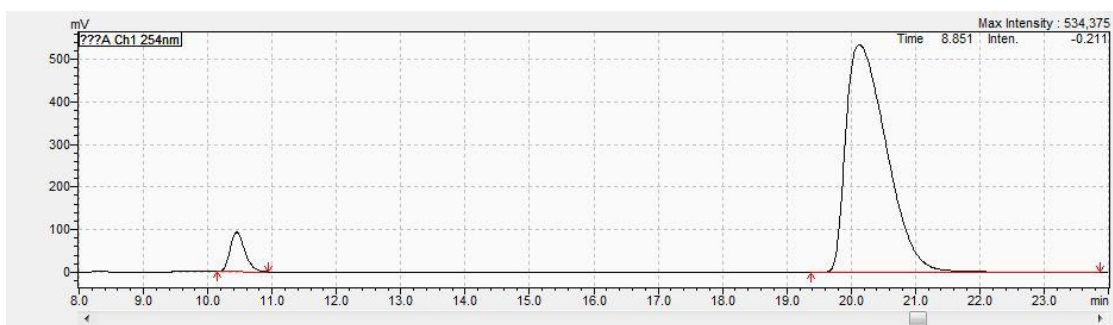

Results View - Peak Table

| Peak# | Ret. Time | Area     | Height | Conc.   | Area%   |
|-------|-----------|----------|--------|---------|---------|
| 1     | 10.449    | 1467734  | 92682  | 5.849   | 5.849   |
| 2     | 20.128    | 23627610 | 535687 | 94.151  | 94.151  |
| Total |           | 25095344 | 628369 | 100.000 | 100.000 |

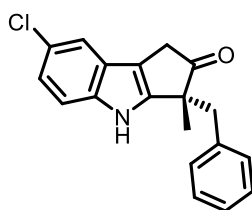

3ah

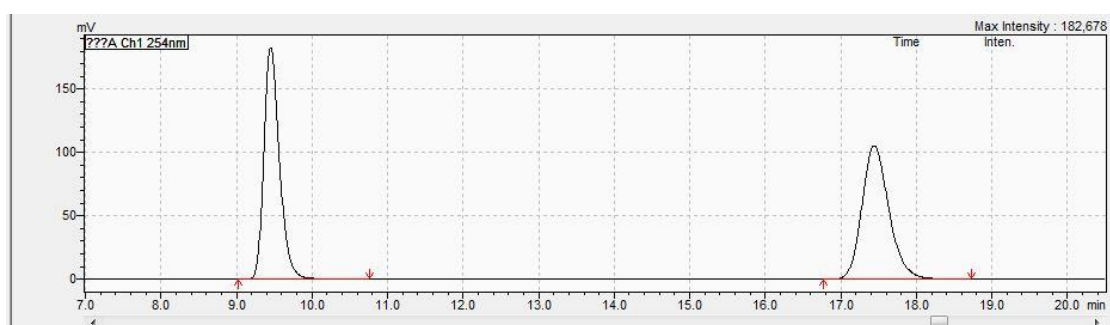

Results View - Peak Table

| Peak# | Ret. Time | Area    | Height | Conc.   | Area%   |
|-------|-----------|---------|--------|---------|---------|
| 1     | 9.452     | 2622829 | 182816 | 49.991  | 49.991  |
| 2     | 17.443    | 2623784 | 105492 | 50.009  | 50.009  |
| Total |           | 5246613 | 288308 | 100.000 | 100.000 |

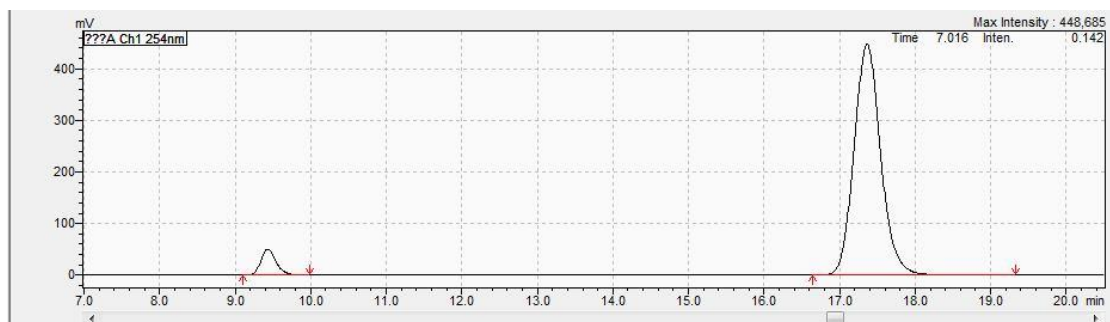

Results View - Peak Table

| Peak# | Ret. Time | Area     | Height | Conc.   | Area%   |
|-------|-----------|----------|--------|---------|---------|
| 1     | 9.431     | 706415   | 50237  | 6.033   | 6.033   |
| 2     | 17.365    | 11002769 | 448643 | 93.967  | 93.967  |
| Total |           | 11709184 | 498880 | 100.000 | 100.000 |

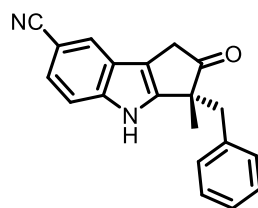

3ai

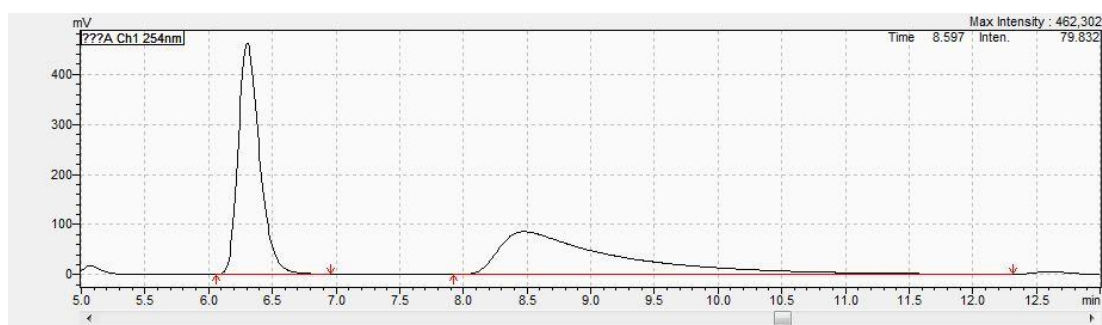

Results View - Peak Table

| Peak# | Ret. Time | Area     | Height | Conc.   | Area%   |
|-------|-----------|----------|--------|---------|---------|
| 1     | 6.303     | 5436135  | 462020 | 49.934  | 49.934  |
| 2     | 8.477     | 5450462  | 85413  | 50.066  | 50.066  |
| Total |           | 10886597 | 547433 | 100.000 | 100.000 |

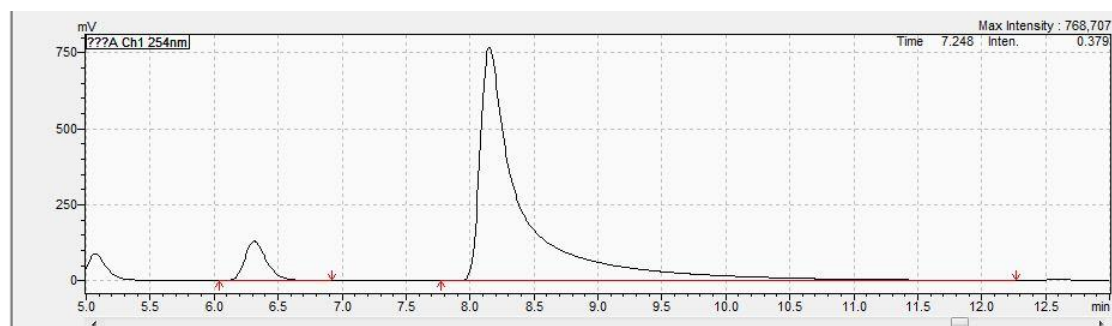

Results View - Peak Table

| Peak# | Ret. Time | Area     | Height | Conc.   | Area%   |
|-------|-----------|----------|--------|---------|---------|
| 1     | 6.314     | 1518824  | 129302 | 7.982   | 7.982   |
| 2     | 8.151     | 17509818 | 768545 | 92.018  | 92.018  |
| Total |           | 19028642 | 897847 | 100.000 | 100.000 |

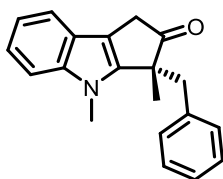

**3aa'**

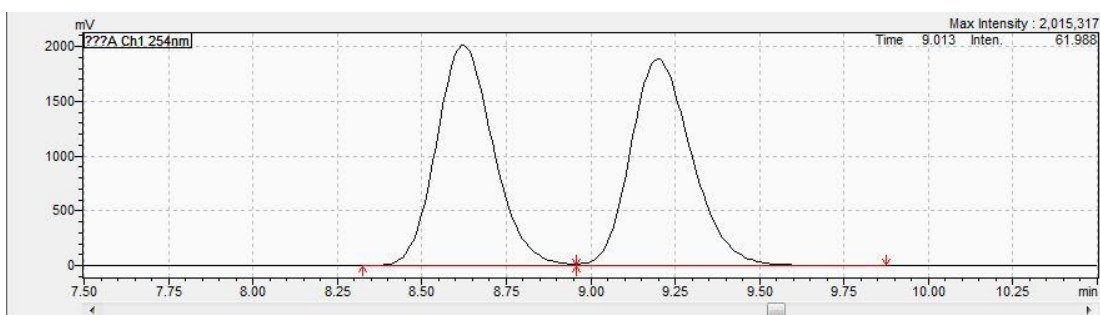

Results View - Peak Table

Peak Table Compound Group Calibration Curve

| Peak# | Ret. Time | Area     | Height  | Conc.   | Area%   |
|-------|-----------|----------|---------|---------|---------|
| 1     | 8.622     | 23618643 | 2014524 | 49.828  | 49.828  |
| 2     | 9.199     | 23781407 | 1896805 | 50.172  | 50.172  |
| Total |           | 47400050 | 3901329 | 100.000 | 100.000 |

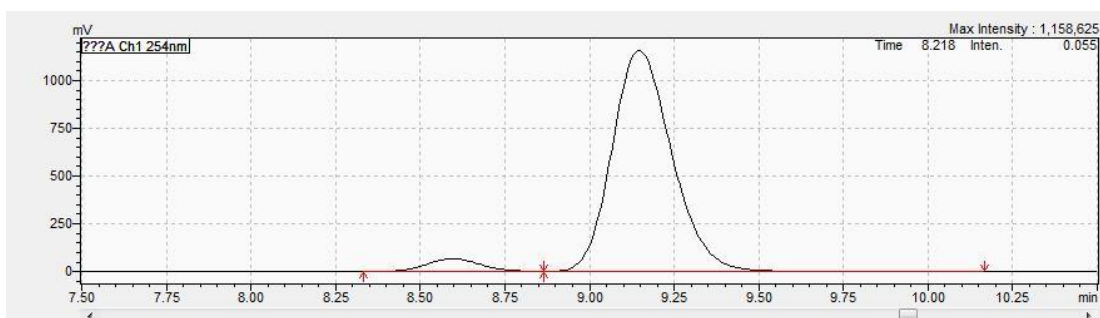

Results View - Peak Table

Peak Table Compound Group Calibration Curve

| Peak# | Ret. Time | Area     | Height  | Conc.   | Area%   |
|-------|-----------|----------|---------|---------|---------|
| 1     | 8.595     | 758721   | 67018   | 5.066   | 5.066   |
| 2     | 9.146     | 14219272 | 1158408 | 94.934  | 94.934  |
| Total |           | 14977993 | 1225426 | 100.000 | 100.000 |



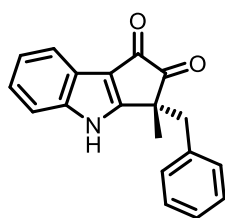

4

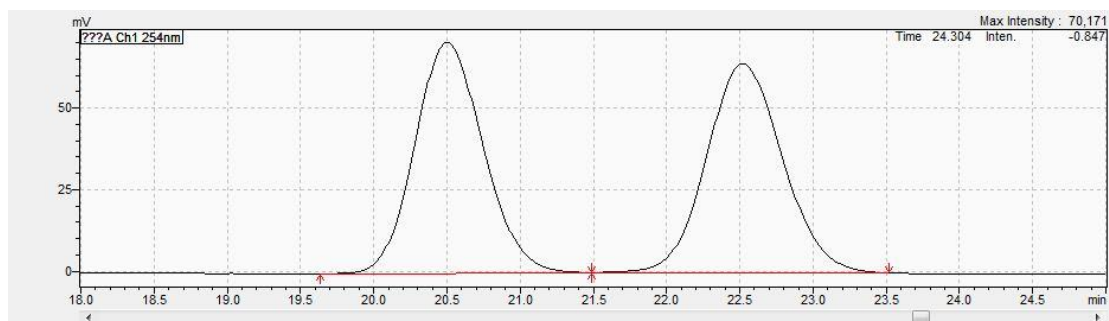

Results View - Peak Table

| Peak# | Ret. Time | Area    | Height | Conc.   | Area%   |
|-------|-----------|---------|--------|---------|---------|
| 1     | 20.501    | 2313382 | 70867  | 49.792  | 49.792  |
| 2     | 22.520    | 2332700 | 64223  | 50.208  | 50.208  |
| Total |           | 4646082 | 135090 | 100.000 | 100.000 |

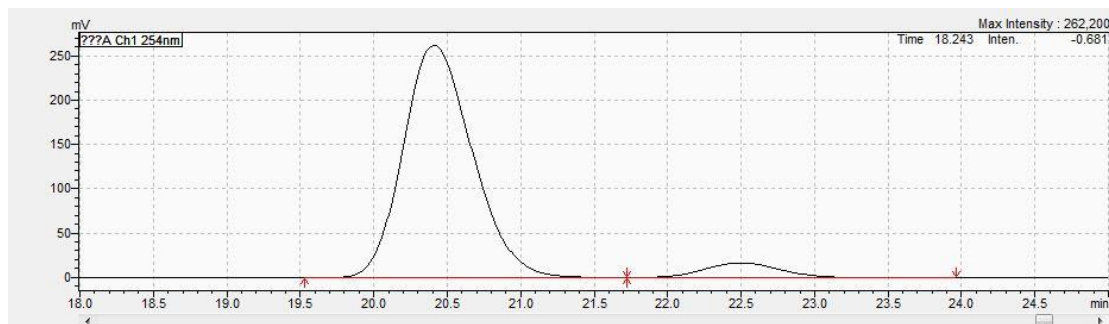

Results View - Peak Table

| Peak# | Ret. Time | Area    | Height | Conc.   | Area%   |
|-------|-----------|---------|--------|---------|---------|
| 1     | 20.412    | 8632331 | 262854 | 93.313  | 93.313  |
| 2     | 22.496    | 618587  | 17009  | 6.687   | 6.687   |
| Total |           | 9250919 | 279863 | 100.000 | 100.000 |

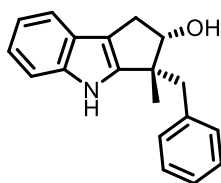

5

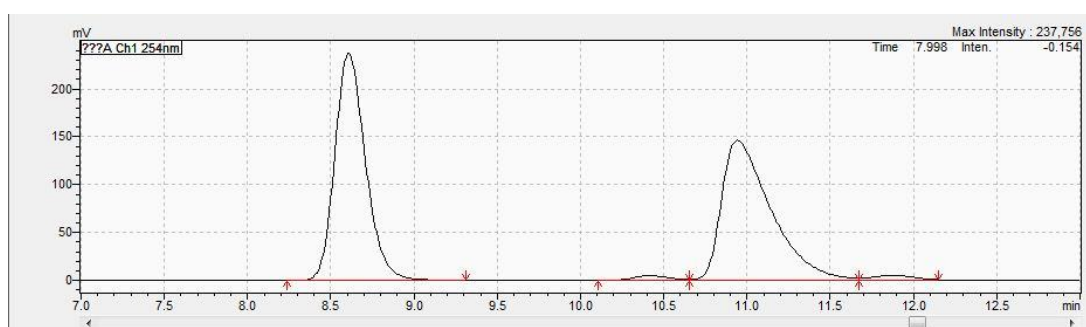

Results View - Peak Table

| Peak# | Ret. Time | Area    | Height | Conc.   | Area%   |
|-------|-----------|---------|--------|---------|---------|
| 1     | 8.607     | 3043986 | 237894 | 48.871  | 48.871  |
| 2     | 10.416    | 75021   | 4960   | 1.204   | 1.204   |
| 3     | 10.942    | 3028871 | 146445 | 48.626  | 48.626  |
| 4     | 11.877    | 80877   | 4809   | 1.298   | 1.298   |
| Total |           | 6228555 | 394108 | 100.000 | 100.000 |

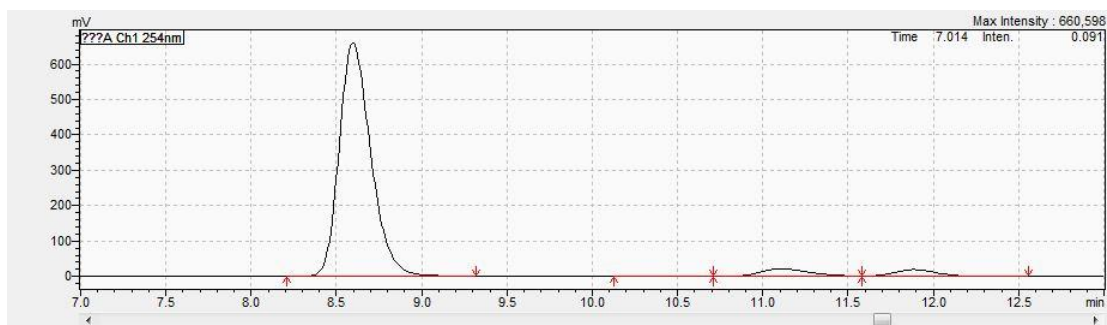

Results View - Peak Table

| Peak# | Ret. Time | Area    | Height | Conc.   | Area%   |
|-------|-----------|---------|--------|---------|---------|
| 1     | 8.597     | 8533765 | 660543 | 91.500  | 91.500  |
| 2     | 10.422    | 14334   | 970    | 0.154   | 0.154   |
| 3     | 11.107    | 440157  | 21397  | 4.719   | 4.719   |
| 4     | 11.868    | 338291  | 19487  | 3.627   | 3.627   |
| Total |           | 9326548 | 702398 | 100.000 | 100.000 |

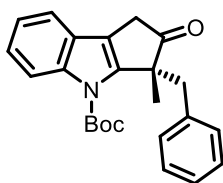

6

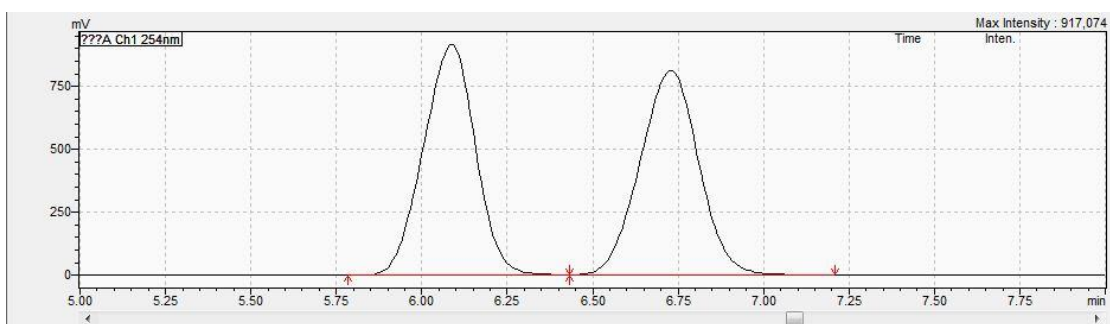

Results View - Peak Table

Peak Table Compound Group Calibration Curve

| Peak# | Ret. Time | Area     | Height  | Conc.   | Area%   |
|-------|-----------|----------|---------|---------|---------|
| 1     | 6.088     | 9709901  | 916621  | 49.924  | 49.924  |
| 2     | 6.729     | 9739633  | 813481  | 50.076  | 50.076  |
| Total |           | 19449533 | 1730102 | 100.000 | 100.000 |

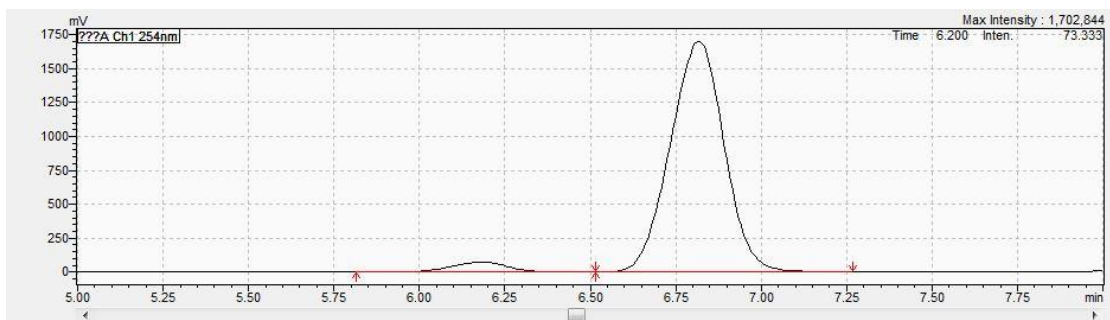

Results View - Peak Table

Peak Table Compound Group Calibration Curve

| Peak# | Ret. Time | Area     | Height  | Conc.   | Area%   |
|-------|-----------|----------|---------|---------|---------|
| 1     | 6.184     | 808858   | 74184   | 4.154   | 4.154   |
| 2     | 6.818     | 18661477 | 1701034 | 95.846  | 95.846  |
| Total |           | 19470336 | 1775217 | 100.000 | 100.000 |

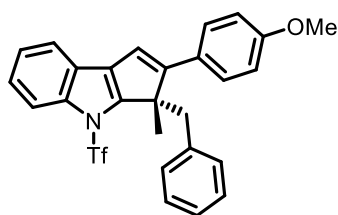

8

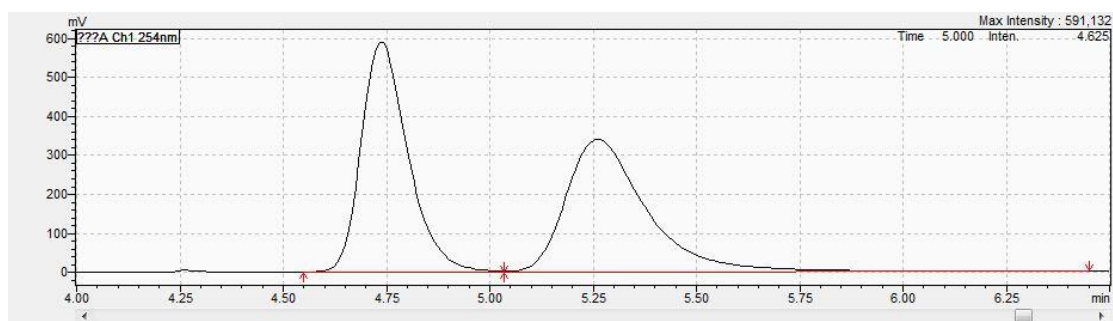

Results View - Peak Table

| Peak# | Ret. Time | Area    | Height | Conc.   | Area%   |
|-------|-----------|---------|--------|---------|---------|
| 1     | 4.738     | 4618004 | 589291 | 50.146  | 50.146  |
| 2     | 5.261     | 4591082 | 340715 | 49.854  | 49.854  |
| Total |           | 9209086 | 930007 | 100.000 | 100.000 |

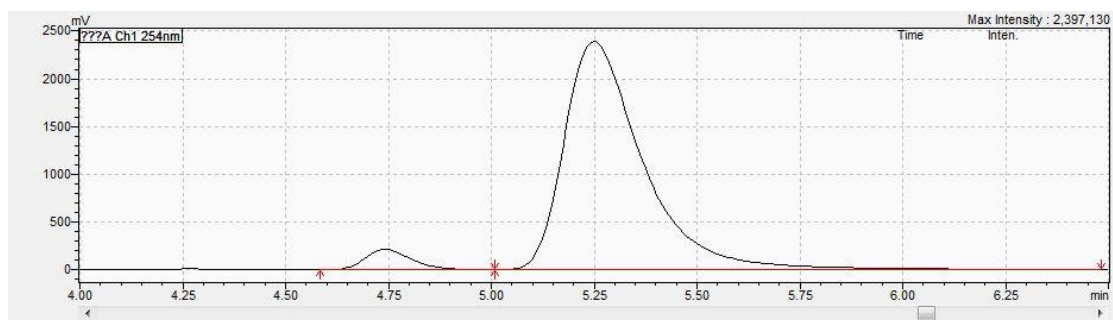

Results View - Peak Table

| Peak# | Ret. Time | Area     | Height  | Conc.   | Area%   |
|-------|-----------|----------|---------|---------|---------|
| 1     | 4.742     | 1657468  | 213437  | 4.956   | 4.956   |
| 2     | 5.249     | 31788788 | 2396122 | 95.044  | 95.044  |
| Total |           | 33446256 | 2609558 | 100.000 | 100.000 |

# 11. Cartesian Coordinates

|     |                                    |                   |                   |    |                   |                   |                   |
|-----|------------------------------------|-------------------|-------------------|----|-------------------|-------------------|-------------------|
| TS1 | -244.19 cm**1 ***imaginary mode*** |                   |                   | H  | 5.27458639665429  | -0.54990836192698 | -3.59962152089860 |
| H   | 1.12608260423783                   | -0.55165120448530 | 0.98167918222643  | H  | 3.99690474128331  | 0.70153381333633  | -3.60924541058939 |
| C   | -0.27744531377416                  | 3.01868026780233  | 1.52345283730398  | H  | 5.43451171883769  | 0.89414282627644  | -2.56854208851639 |
| C   | -0.85012493777562                  | 2.00456587284896  | 0.54817852394358  | H  | 3.66741895867854  | -2.37986483253240 | -3.01825547937578 |
| C   | 0.06758629169983                   | 2.10161293653530  | -0.64288196402478 | H  | 2.58240613737697  | -2.21175733962244 | -1.61048362434985 |
| H   | -0.30219362108695                  | 2.05473668516127  | -1.66979244873994 | H  | 2.31386637920851  | -1.21564081437532 | -3.06894386205390 |
| C   | 1.39006996111804                   | 1.77048836765786  | -0.35375050256149 | Rh | 0.96287955670576  | 3.97282500533857  | -0.06147784218489 |
| C   | 1.60998145852604                   | 1.53463512400926  | 1.12716738389917  | C  | 0.31148713158620  | 5.82798206196497  | 0.57093589458084  |
| C   | 1.06761963435712                   | 2.78705973173723  | 1.78243340290022  | C  | -0.75024774041864 | 6.15445947519453  | -0.28373118742008 |
| H   | 1.58505872068042                   | 3.26350565211781  | 2.61891933490498  | C  | -1.80599891474768 | 6.96213251137412  | 0.14105556019969  |
| C   | -0.71477444728561                  | 0.59593780881027  | 1.17763425757464  | C  | -1.75077051642776 | 7.51930327235439  | 1.41922547183559  |
| H   | -1.09768685107649                  | -0.15277945159375 | 0.46836708781465  | C  | -0.66788356515702 | 7.25942937175856  | 2.25329080910373  |
| H   | -1.36594369797692                  | 0.55922253424454  | 2.06513135851994  | C  | 0.38516647394946  | 6.41478021599266  | 1.85771049911267  |
| C   | 0.75355995267120                   | 0.30999199039094  | 1.56428431257336  | H  | -0.75737945903972 | 5.76407772841116  | -1.30655187905285 |
| C   | -1.20799487042115                  | 3.79525878574165  | 2.39292562791916  | H  | -2.63891587190583 | 7.17664287917838  | -0.53221380301128 |
| H   | -1.83853093032625                  | 3.07851829447610  | 2.94721709873432  | H  | -2.54791390880118 | 8.18224838755554  | 1.76591410069921  |
| H   | -1.87835650005774                  | 4.43853455013305  | 1.80407699107056  | H  | -0.62369599207744 | 7.70994143095945  | 3.24943206929240  |
| H   | -0.66627732701341                  | 4.41226463856287  | 3.11935801114323  | C  | 4.12090142975979  | 4.58134797454864  | -0.95736906071868 |
| C   | 0.91998298549191                   | -0.03707104608748 | 3.05316301386046  | C  | 3.08559550632265  | 4.35332404385624  | -2.06984001965509 |
| H   | 0.43473639478157                   | 0.76988847650109  | 3.63481426811321  | C  | 3.33734676461448  | 5.37259204718673  | 0.07259665512959  |
| C   | 0.20657560837214                   | -1.34663337742808 | 3.37735475218628  | C  | 1.83595985729427  | 5.03484382368071  | -1.72598188729185 |
| H   | -0.85858433439857                  | -1.31743742104296 | 3.10276950208707  | C  | 2.04024828639582  | 5.82596402870565  | -0.53461591511330 |
| H   | 0.26896449931410                   | -1.57426794070522 | 4.45285588313950  | H  | 1.15129695930985  | 5.32081452064516  | -2.52901843209596 |
| H   | 0.66979629310560                   | -2.18449314263392 | 2.82934320626961  | H  | 1.86081560718937  | 6.90105432574300  | -0.47621703126146 |
| C   | 2.38256104270673                   | -0.11459125498469 | 3.48051045796409  | O  | 3.34470672217882  | 3.76939786252741  | -3.10578147183066 |
| H   | 2.94269918389649                   | -0.81857254985524 | 2.84137203891779  | O  | 3.76519087788971  | 5.69282712395911  | 1.16796056177962  |
| H   | 2.46393321856516                   | -0.47106923855625 | 4.51899045316812  | C  | 5.21895096948687  | 5.49536912069324  | -1.51663596022561 |
| H   | 2.88943509887809                   | 0.86065755600796  | 3.43012786195584  | H  | 5.74478007818457  | 4.97652819273921  | -2.33182003573876 |
| C   | 2.18084339976146                   | 1.11127426448213  | -1.44728448664243 | H  | 4.79561932855510  | 6.42930408360160  | -1.91753671395792 |
| C   | 3.99969293663337                   | -0.57889053042395 | -1.85050636419724 | H  | 5.94262422803435  | 5.75074022881776  | -0.72968065156835 |
| O   | 1.82778385698286                   | 1.19178819536422  | -2.62043113067300 | C  | 4.67479858326615  | 3.24151282396355  | -0.45382007899707 |
| H   | 2.66859312699952                   | 1.39458138013638  | 1.37631016158652  | H  | 3.83127758511112  | 2.67851643435072  | -0.04041739118635 |
| H   | -1.89145764159280                  | 2.23645658327527  | 0.28987659497150  | H  | 5.01365665071783  | 2.69888077660429  | -1.34883913555817 |
| N   | 3.21250923532972                   | 0.34995113404162  | -1.02817732318995 | C  | 5.77902653782479  | 3.27759458128303  | 0.56270152795160  |
| H   | 3.40184358584892                   | 0.32643549623664  | -0.03416212787816 | C  | 7.12133802423009  | 3.35505324703717  | 0.16900823283277  |
| C   | 3.08209295165474                   | -1.66249182554889 | -2.42336944664998 | C  | 5.49180109457779  | 3.19244446096519  | 1.93147641500901  |
| C   | 4.71716002176845                   | 0.16644870639871  | -2.97745911350980 | C  | 8.14674836488482  | 3.36683624172810  | 1.11477111979245  |
| C   | 5.02700394137071                   | -1.20887616330059 | -0.91291988755130 | H  | 7.36629558259751  | 3.39643337598293  | -0.89603579251411 |
| H   | 5.65270697196275                   | -1.92508176231542 | -1.46442675606661 | C  | 6.51278790335599  | 3.20169183911833  | 2.88004722874167  |
| H   | 5.68462294147265                   | -0.43912987486462 | -0.47861907483548 | H  | 4.44960911009878  | 3.11716464987025  | 2.25350726200315  |
| H   | 4.53052410031812                   | -1.74905771000052 | -0.09069151834620 | C  | 7.84544453295632  | 3.29308112423449  | 2.47480955560281  |

|                                                |                   |                   |                   |    |                   |                   |                   |
|------------------------------------------------|-------------------|-------------------|-------------------|----|-------------------|-------------------|-------------------|
| H                                              | 9.18783599889528  | 3.42545147868086  | 0.78604908062143  | C  | 4.56094370401100  | 0.11523448654273  | -3.03564894649246 |
| H                                              | 6.26733362638025  | 3.13247339980551  | 3.94313061838070  | C  | 4.94640704497044  | -1.22199882530291 | -0.95813460965531 |
| H                                              | 8.64785841008006  | 3.29734968967719  | 3.21720591123315  | H  | 5.55641044847271  | -1.94830152400066 | -1.51401430637363 |
| N                                              | 1.41002116165678  | 6.11944217221740  | 2.72301116968149  | H  | 5.61491358608870  | -0.44127748640887 | -0.56232729216114 |
| H                                              | 2.31589392050171  | 5.93260139908758  | 2.28586905015389  | H  | 4.47919715432760  | -1.74589787418525 | -0.10860368732914 |
| H                                              | 1.48382371622352  | 6.73935044860413  | 3.52230116154697  | H  | 5.13966140395262  | -0.60034006271238 | -3.63901722005105 |
| <b>TS2 -240.39 cm**-1 ***imaginary mode***</b> |                   |                   |                   |    |                   |                   |                   |
| H                                              | 0.99072802022557  | -0.60451063316424 | 0.95475017190873  | H  | 5.24889485739830  | 0.88835872982675  | -2.66182044120500 |
| C                                              | -0.37572684300968 | 2.97549065784675  | 1.53173907861149  | H  | 3.53723304274101  | -2.43786796256142 | -3.00624919123680 |
| C                                              | -0.95850009887470 | 1.96860027341099  | 0.55488485379262  | H  | 2.49753711670121  | -2.26413800743437 | -1.56567226874185 |
| C                                              | -0.03885887830186 | 2.06081711581209  | -0.63437951588776 | H  | 2.16831971790578  | -1.29112301940075 | -3.02733835431733 |
| H                                              | -0.40808763972189 | 2.02207532742246  | -1.66176765904857 | Rh | 0.88329510118414  | 3.91746275901084  | -0.05111637494058 |
| C                                              | 1.28144106447406  | 1.71798614490369  | -0.34766032950373 | C  | 0.26621203206376  | 5.78650382634894  | 0.56723718801501  |
| C                                              | 1.49715882921812  | 1.47154847511996  | 1.13251786430319  | C  | -0.77362104511813 | 6.12619747115083  | -0.30843721057088 |
| C                                              | 0.96558310630570  | 2.72664375514059  | 1.79284279265131  | C  | -1.82833160210847 | 6.94599886932910  | 0.09654577757691  |
| H                                              | 1.48707713751513  | 3.19656943375090  | 2.63066057013123  | C  | -1.79103742166197 | 7.50138943979397  | 1.37610127447031  |
| C                                              | -0.83785524843774 | 0.55738112464360  | 1.18088961502862  | C  | -0.72698299265222 | 7.22990536964680  | 2.23060807052730  |
| H                                              | -1.23758555656167 | -0.18547556977658 | 0.47468470248751  | C  | 0.32421530320509  | 6.37371941079952  | 1.85458878785254  |
| H                                              | -1.48179329673296 | 0.52887961714425  | 2.07413091678319  | H  | -0.76465053046052 | 5.73612549660111  | -1.33155111755011 |
| C                                              | 0.62924883301710  | 0.24974202025547  | 1.55523213925575  | H  | -2.64590346652529 | 7.17052820936041  | -0.59208304012838 |
| C                                              | -1.29689166652289 | 3.76565004181231  | 2.39902470414212  | H  | -2.58802631267437 | 8.17173743608031  | 1.70876451487317  |
| H                                              | -1.93639857190869 | 3.05905350794357  | 2.95615530181288  | H  | -0.69780768229355 | 7.67828805213770  | 3.22827754175432  |
| H                                              | -1.95958870713888 | 4.41498710066487  | 1.80806079252155  | C  | 4.06675747083925  | 4.43388275073766  | -0.89001298217168 |
| H                                              | -0.74726701806987 | 4.37880134414540  | 3.12295982049615  | C  | 3.04123006149258  | 4.20506612309319  | -2.00682449749230 |
| C                                              | 0.79793602953564  | -0.12974672150952 | 3.03581257282629  | C  | 3.28064239402956  | 5.23578862004493  | 0.12861544350015  |
| H                                              | 0.32660340457765  | 0.67160425167505  | 3.63636267483985  | C  | 1.81529779498744  | 4.94647295642031  | -1.69996886937944 |
| C                                              | 0.06814749288599  | -1.43605151803732 | 3.33604246730828  | C  | 2.02075518044293  | 5.73867993746614  | -0.50888047637402 |
| H                                              | -0.99796742317855 | -1.38655311624461 | 3.06832256261530  | H  | 1.16167293383730  | 5.25184115939593  | -2.52140354965634 |
| H                                              | 0.13348229501294  | -1.68782366434945 | 4.40598513584295  | H  | 1.87162018127120  | 6.81837105642007  | -0.45506166669138 |
| H                                              | 0.51689497986428  | -2.26817345323299 | 2.76749929632492  | O  | 3.29499304365294  | 3.59657567442605  | -3.03044795535278 |
| C                                              | 2.26135670871099  | -0.23663069597175 | 3.45388156898464  | O  | 3.69149581679518  | 5.50194858949756  | 1.24666270324885  |
| H                                              | 2.80953321857317  | -0.93137110628357 | 2.79446315191934  | C  | 4.68735906420793  | 3.18144919711646  | -0.30028110255693 |
| H                                              | 2.34330000621892  | -0.61990835156882 | 4.48272962316901  | H  | 5.45047389085794  | 3.45727378504753  | 0.44176423380202  |
| H                                              | 2.77907566392254  | 0.73357019297714  | 3.42536629478794  | H  | 3.92911400597341  | 2.56568009748598  | 0.19621778056313  |
| C                                              | 2.06184296887337  | 1.05903664930294  | -1.44855859600218 | H  | 5.16289614952646  | 2.58285717911530  | -1.08940844255741 |
| C                                              | 3.88586542571679  | -0.61678347458259 | -1.87475137726072 | C  | 5.20298516599707  | 5.33171354032613  | -1.45995252232019 |
| O                                              | 1.68132550052773  | 1.11941444124846  | -2.61409038040650 | H  | 5.90663030370488  | 5.52435530057467  | -0.63504404039085 |
| H                                              | 2.55352083988005  | 1.31982293870275  | 1.38355854319214  | H  | 5.72725650380394  | 4.72266941748982  | -2.21251538314872 |
| H                                              | -1.99737618591975 | 2.21127451606647  | 0.29658286717827  | C  | 4.75818164869145  | 6.63205679491144  | -2.07016121192759 |
| N                                              | 3.11514061412108  | 0.31959240942753  | -1.04532268673183 | C  | 4.44280515595584  | 6.71512028763873  | -3.43273298299796 |
| H                                              | 3.31579748491555  | 0.29602112665354  | -0.05372952556076 | C  | 4.62602524700272  | 7.78402148805455  | -1.28334626277077 |
| C                                              | 2.96307979210062  | -1.71948780284479 | -2.40167856790781 | C  | 4.00018539818198  | 7.91298894798422  | -3.99205446103034 |
|                                                |                   |                   |                   | H  | 4.54544919528819  | 5.82573045164047  | -4.05980790284607 |

|            |                                            |                   |                   |    |                   |                   |                   |
|------------|--------------------------------------------|-------------------|-------------------|----|-------------------|-------------------|-------------------|
| C          | 4.18216883667222                           | 8.98347506334386  | -1.83926466051030 | N  | 2.31558989354441  | 0.21210414841671  | 2.90321599957774  |
| H          | 4.87886960420503                           | 7.73951877893304  | -0.22023142586174 | H  | 1.58350879587495  | 0.70733899154604  | 3.39940933079621  |
| C          | 3.86576767909608                           | 9.05135426089679  | -3.19647155749206 | C  | 3.50940285929632  | -1.88515123706768 | 3.36156352113805  |
| H          | 3.76368915432617                           | 7.95852262563296  | -5.05843397278388 | C  | 4.68656674140545  | 0.33646233513077  | 3.52954149359216  |
| H          | 4.09003695284706                           | 9.87225687912383  | -1.20955621362132 | C  | 2.90460034509813  | -0.27306543314770 | 5.17646664177533  |
| H          | 3.52225276469020                           | 9.99163146110763  | -3.63530862903890 | H  | 3.65304774280476  | -0.71462200270518 | 5.84980740193370  |
| N          | 1.32909916930324                           | 6.06667323642977  | 2.73699660993606  | H  | 2.77807363997310  | 0.78623274463456  | 5.45270020995174  |
| H          | 2.23538745736136                           | 5.84278883238168  | 2.31831878814376  | H  | 1.94701354822630  | -0.79293940895477 | 5.33671800515681  |
| H          | 1.40335846108249                           | 6.68599693687817  | 3.53636937890942  | H  | 5.47753405922837  | -0.13140567195123 | 4.13487937916259  |
|            |                                            |                   |                   | H  | 4.99126011626188  | 0.31444500329321  | 2.47451362981667  |
| <b>TS3</b> | <b>-244.90 cm**-1 ***imaginary mode***</b> |                   |                   | H  | 4.58805885605899  | 1.38689397095067  | 3.84383188221438  |
| H          | -0.57315046637262                          | -0.86164990843769 | 0.39217558372812  | H  | 4.26773980701205  | -2.35709540262374 | 4.00429253431169  |
| C          | -0.6644726579085                           | 3.01361934297315  | 0.21062294033685  | H  | 2.55419622807275  | -2.41290976459018 | 3.50673423997127  |
| C          | -0.05947258701986                          | 2.09512152463771  | -0.83834000313394 | H  | 3.81593472304737  | -1.99770049542451 | 2.31336298295936  |
| C          | 1.28214400115471                           | 1.73546191048057  | -0.25530909736864 | Rh | 1.27174126690993  | 3.19314560954316  | 1.40630442525900  |
| H          | 2.19360380330789                           | 1.68388158987481  | -0.85319726334048 | C  | 0.89452514629825  | 4.52732573885495  | 2.94914869084391  |
| C          | 1.18309987903705                           | 1.10444894871938  | 0.98164182217570  | C  | 1.32858028774176  | 3.80040061164219  | 4.06577193770245  |
| C          | -0.25559353499371                          | 0.96990904991007  | 1.46382891987133  | C  | 0.70801128856719  | 3.93303880149829  | 5.31021950871211  |
| C          | -0.75518780384190                          | 2.40464526544635  | 1.45415991176763  | C  | -0.31296869888621 | 4.87288031302569  | 5.44865624437233  |
| H          | -1.36864959311228                          | 2.81060616045252  | 2.26251442765004  | C  | -0.69077921506920 | 5.66786103312405  | 4.37058011217223  |
| C          | -0.93323259484863                          | 0.82382474958297  | -0.94333110944071 | C  | -0.08752670440277 | 5.53703431504109  | 3.10355941827828  |
| H          | -0.49450826883434                          | 0.15189263410667  | -1.69588318075540 | H  | 2.16415460390571  | 3.10072914806669  | 3.96500748625739  |
| H          | -1.92474985492089                          | 1.12166753546796  | -1.31948525490110 | H  | 1.04096405249251  | 3.32895894179142  | 6.15714819954009  |
| C          | -1.05757776463158                          | 0.13032459234507  | 0.43080498912085  | H  | -0.80588389971580 | 5.01235479834403  | 6.41453785041660  |
| C          | -1.40283535814689                          | 4.22992299950082  | -0.23073056446059 | H  | -1.47233485664518 | 6.42334584597162  | 4.49494548095017  |
| H          | -2.25749331240794                          | 3.91398862917820  | -0.85451804113434 | C  | 3.31307969855209  | 4.74885937052412  | -0.58254304539090 |
| H          | -0.76661208903674                          | 4.87405973798262  | -0.85552470536913 | C  | 2.26822540155774  | 5.39939621132956  | 0.31135413298647  |
| H          | -1.77154971875767                          | 4.82052351490474  | 0.61620885467196  | C  | 3.82542521291739  | 3.59898462899989  | 0.29749095893585  |
| C          | -2.5220849698229                           | -0.08311320155479 | 0.84887371844552  | C  | 2.50237606207459  | 4.96318704807510  | 1.73112811932717  |
| H          | -3.02644487043284                          | 0.89937118627697  | 0.77659749142055  | C  | 3.31687026923037  | 3.77101753917200  | 1.65584367758014  |
| C          | -3.21816754156530                          | -1.04238015178696 | -0.11285526190228 | H  | 2.63085104227888  | 5.76235734451479  | 2.46451650361643  |
| H          | -3.15736378704145                          | -0.70149056813239 | -1.15723991339856 | H  | 3.86419680537552  | 3.34850018131506  | 2.50171771988113  |
| H          | -4.28388635693019                          | -1.15009368990397 | 0.14216755251109  | O  | 1.45811966490820  | 6.23518193415561  | -0.05957116852051 |
| H          | -2.75784673913821                          | -2.04343765034552 | -0.06032846034404 | O  | 4.60137496898439  | 2.74810503048966  | -0.10296679026943 |
| C          | -2.66599343891166                          | -0.58351832853088 | 2.28269500748630  | C  | 4.49258313682728  | 5.72888372956607  | -0.71412780471329 |
| H          | -2.08286358954777                          | -1.50701403988190 | 2.43849446820440  | H  | 4.17503537981008  | 6.64926582703281  | -1.22328147019597 |
| H          | -3.71896202888611                          | -0.81468498466604 | 2.50626779209515  | H  | 4.90036153864770  | 5.99573211543159  | 0.27293842312285  |
| H          | -2.32998552001672                          | 0.15640067542286  | 3.02418251399281  | H  | 5.29228254167016  | 5.25805869390682  | -1.30485648927259 |
| C          | 2.33214149519189                           | 0.32828802973402  | 1.55998359086748  | C  | 2.80009072041220  | 4.26062224162363  | -1.94841070844279 |
| C          | 3.36230263886247                           | -0.40649602357703 | 3.72642820079561  | H  | 3.36356592950988  | 3.34354751112771  | -2.17897911055838 |
| O          | 3.20340437631166                           | -0.14617240428543 | 0.83833593145805  | H  | 1.74376277013164  | 3.97522937210683  | -1.83795751722717 |
| H          | -0.30460401246462                          | 0.52230979556292  | 2.46230702530061  | C  | 2.94361287484863  | 5.20600381944387  | -3.11141112652634 |
| H          | 0.02695494216292                           | 2.59747158569276  | -1.81031397979453 | C  | 2.15026333477720  | 6.35604263488236  | -3.22727514351788 |

|            |                                            |                   |                   |    |                   |                   |                   |
|------------|--------------------------------------------|-------------------|-------------------|----|-------------------|-------------------|-------------------|
| C          | 3.88192013962526                           | 4.94299831246260  | -4.11661378664761 | O  | 3.12591360647037  | -0.06924732242880 | 0.71732715473894  |
| C          | 2.29377148153448                           | 7.21453567997606  | -4.31602961896212 | H  | -0.31816802229978 | 0.46856494540471  | 2.49555427397914  |
| H          | 1.42769344535592                           | 6.58046265692779  | -2.43921656419165 | H  | -0.26344159178382 | 2.62676834184016  | -1.74667890041524 |
| C          | 4.02811719412474                           | 5.79931204011428  | -5.20887071507619 | N  | 2.32017264197056  | 0.26434357771853  | 2.82087766037853  |
| H          | 4.50625684703532                           | 4.04754692669821  | -4.04222663695885 | H  | 1.59783924781616  | 0.74403125373151  | 3.34569526461070  |
| C          | 3.23310837645591                           | 6.93996895936208  | -5.31223586343595 | C  | 3.60569587372594  | -1.78719255560950 | 3.23494327631324  |
| H          | 1.66645892552561                           | 8.10715319356195  | -4.38908586265912 | C  | 4.70841524383888  | 0.47465613191150  | 3.35376898397105  |
| H          | 4.76611327553715                           | 5.57126659961959  | -5.98266616761047 | C  | 3.01397503373011  | -0.19219461413842 | 5.06962911614955  |
| H          | 3.34334808851797                           | 7.61289709678004  | -6.16661464220752 | H  | 3.80173330614068  | -0.60680042678607 | 5.71466955460382  |
| N          | -0.4635733523810                           | 6.33853067201297  | 2.06620317775977  | H  | 2.86242515385583  | 0.86289702903078  | 5.34928769905875  |
| H          | -0.98465514047563                          | 7.17541170565609  | 2.29481243301968  | H  | 2.08095474999670  | -0.74311726172601 | 5.26679005891257  |
| H          | 0.16030566099077                           | 6.40976718156995  | 1.26013377273658  | H  | 5.53863366289055  | 0.03550695318281  | 3.92720741778876  |
|            |                                            |                   |                   | H  | 4.97235040268282  | 0.46152137283537  | 2.28752630953112  |
| <b>TS4</b> | <b>-244.50 cm**-1 ***imaginary mode***</b> |                   |                   | H  | 4.58720335125560  | 1.52150160586813  | 3.67219266104608  |
| H          | -0.62453782511627                          | -0.88291929306629 | 0.40423011605614  | H  | 4.40556984561445  | -2.22901321134482 | 3.84804523889793  |
| C          | -0.86112346964290                          | 2.98783210316639  | 0.31381890760458  | H  | 2.67698920849158  | -2.34897123440384 | 3.41903400347420  |
| C          | -0.28475949813798                          | 2.10527929536227  | -0.78117254466668 | H  | 3.87446512378386  | -1.89176805881246 | 2.17554434795237  |
| C          | 1.09566118244379                           | 1.77615756855396  | -0.27343311790123 | Rh | 1.12613127446918  | 3.20242606819713  | 1.41721679221196  |
| H          | 1.97709953847177                           | 1.77261417154379  | -0.91791823089532 | C  | 0.78599384699773  | 4.45068155061355  | 3.04002220432141  |
| C          | 1.07796619377052                           | 1.12376890302803  | 0.95640597854100  | C  | 1.29009808479884  | 3.69030327710349  | 4.10366117724924  |
| C          | -0.33072858137276                          | 0.93460963053626  | 1.50439453672577  | C  | 0.71009759654321  | 3.73484826690172  | 5.37337862571001  |
| C          | -0.87445203668477                          | 2.35354576111426  | 1.54764030176310  | C  | -0.34496055311799 | 4.62008647568053  | 5.59303312604572  |
| H          | -1.45745735834366                          | 2.72586306617332  | 2.39376314383956  | C  | -0.79110902972158 | 5.45216751612894  | 4.57017838041919  |
| C          | -1.12909206412553                          | 0.81365154827718  | -0.86637926520376 | C  | -0.22635520234647 | 5.41151551020538  | 3.27986807766865  |
| H          | -0.72221184217015                          | 0.17204207543954  | -1.66206087521821 | H  | 2.15228310330874  | 3.03745709424559  | 3.93773019295206  |
| H          | -2.14960182727871                          | 1.09459849540807  | -1.17150865653680 | H  | 1.09854649640599  | 3.10522066632542  | 6.17707477140124  |
| C          | -1.15027188259316                          | 0.08450216468074  | 0.49413995886326  | H  | -0.81084907873141 | 4.68865606122242  | 6.57972157784741  |
| C          | -1.64627438839158                          | 4.19496927594676  | -0.06796002654091 | H  | -1.59839334800426 | 6.16646891538625  | 4.75814091301985  |
| H          | -2.54153462398547                          | 3.87040922593458  | -0.62736063306992 | C  | 3.00798237385072  | 4.91406299335770  | -0.57939471735583 |
| H          | -1.06672876778335                          | 4.84565437308403  | -0.73978700741404 | C  | 2.04911390240525  | 5.52519273865178  | 0.42865937738680  |
| H          | -1.95722411289346                          | 4.78062627858334  | 0.80531041540936  | C  | 3.58998057780709  | 3.72525446226074  | 0.19084783070805  |
| C          | -2.57897162795932                          | -0.20706348404834 | 0.98212095767850  | C  | 2.34845534807501  | 4.97735027607927  | 1.79273031052219  |
| H          | -3.12898484071664                          | 0.75323374013026  | 0.96772479841551  | C  | 3.16690434379364  | 3.80343753327845  | 1.58697612460721  |
| C          | -3.28273051020311                          | -1.16880429254806 | 0.02842619970483  | H  | 2.51039109540386  | 5.71801347866428  | 2.57829613422022  |
| H          | -3.29551395664710                          | -0.79396250173070 | -1.00596578455672 | H  | 3.76685923305509  | 3.32977089200338  | 2.36714139100201  |
| H          | -4.32650058529678                          | -1.33534569499544 | 0.33689663043085  | O  | 1.24740328661564  | 6.40651949546950  | 0.16007813879075  |
| H          | -2.77441810184334                          | -2.14780392948765 | 0.02298774036533  | O  | 4.35150756222216  | 2.91249904816359  | -0.30933856357215 |
| C          | -2.62105946334027                          | -0.75516763205560 | 2.40497901213658  | C  | 2.35427325845853  | 4.55940939086927  | -1.90306221162460 |
| H          | -1.98522727623665                          | -1.65170748636679 | 2.49992952141734  | H  | 3.05521333011189  | 3.97625938917391  | -2.51819569975511 |
| H          | -3.64773031820480                          | -1.04565900061726 | 2.67641993577152  | H  | 1.44408285676591  | 3.96718155155249  | -1.74894623334191 |
| H          | -2.28182576345418                          | -0.02057890178308 | 3.15027738213773  | H  | 2.08205168286822  | 5.47234650106691  | -2.45215750619934 |
| C          | 2.27502402969290                           | 0.38002788371393  | 1.47796653491652  | C  | 4.16463976347275  | 5.92261199071244  | -0.84674170939259 |
| C          | 3.41990324345824                           | -0.31396055434911 | 3.60307569213492  | H  | 4.82218536880842  | 5.44707510164474  | -1.59079018934635 |



|            |                                  |                             |                   |    |                   |                   |                   |
|------------|----------------------------------|-----------------------------|-------------------|----|-------------------|-------------------|-------------------|
| H          | 3.71650275199585                 | 6.81168049462088            | -1.31749515083751 | H  | 2.09070048899803  | 0.14529782823964  | 3.43281101308074  |
| C          | 4.96593865159236                 | 6.31932227567394            | 0.36195022623910  | C  | 2.12323791567571  | 1.13055509220897  | -1.32649435867789 |
| C          | 4.58431643041195                 | 7.41011104387211            | 1.15382696155106  | C  | 4.30204780314221  | -0.12509920202402 | -1.49445712431416 |
| C          | 6.09639317092060                 | 5.58291922543405            | 0.74025865722747  | O  | 1.79332596695653  | 0.98644446886421  | -2.50030879471266 |
| C          | 5.30701210503765                 | 7.75076817039136            | 2.29739768342272  | H  | 2.15445092829522  | 1.00037419904236  | 1.49396831954948  |
| H          | 3.71031253302373                 | 8.00251122083406            | 0.86759062447583  | H  | -2.10696247914609 | 2.49219093900828  | -0.02801976331049 |
| C          | 6.82016254288090                 | 5.91960493407655            | 1.88300114139854  | N  | 3.30110390945938  | 0.71255983438611  | -0.82033826951971 |
| H          | 6.40742462275817                 | 4.73094437758505            | 0.13019933169905  | H  | 3.46164797293920  | 0.88632591096086  | 0.16330898560926  |
| C          | 6.42592723117503                 | 7.00407555281108            | 2.66761049331084  | C  | 3.67169415694552  | -1.46915492218959 | -1.86992908486297 |
| H          | 4.99729859322461                 | 8.60840337984047            | 2.90025590053979  | C  | 4.85585508794503  | 0.57107729977748  | -2.73795483018147 |
| H          | 7.70060660247918                 | 5.3371357088280             | 2.15989584739315  | C  | 5.42375618866740  | -0.34205235137505 | -0.4807377687052  |
| H          | 6.99447226289745                 | 7.27150531434631            | 3.56201313864883  | H  | 6.20490279892705  | -0.98426186521227 | -0.91185620967593 |
| N          | -0.67262169252215                | 6.24681357907665            | 2.29461918976449  | H  | 5.88516647954179  | 0.61625504248671  | -0.19408271737305 |
| H          | -1.20968537401744                | 7.05164912359221            | 2.59279961416107  | H  | 5.04052762049878  | -0.83167215687533 | 0.42897583535120  |
| H          | -0.05010039976985                | 6.41277016610159            | 1.50140421260918  | H  | 5.62160296530539  | -0.06436952018157 | -3.20790989882173 |
|            |                                  |                             |                   | H  | 4.05513264301729  | 0.76360351925594  | -3.46297975772795 |
| <b>TSS</b> | <b>-311.90 cm**<sup>-1</sup></b> | <b>***imaginary mode***</b> |                   | H  | 5.31593577210586  | 1.53468617095045  | -2.47367244636330 |
| H          | 0.48269263719537                 | -0.67286036849949           | 0.65075455714869  | H  | 4.41819333588222  | -2.11816511018028 | -2.35223907700446 |
| C          | -0.57542283911685                | 2.97024140309776            | 1.44630810148862  | H  | 3.29461320688704  | -1.98135439185732 | -0.97103105623180 |
| C          | -1.13708136388274                | 2.11517727848831            | 0.32170145320956  | H  | 2.83474413888352  | -1.32146293127384 | -2.56649612713243 |
| C          | -0.07079811092415                | 2.20253570266828            | -0.74321387856546 | Rh | 0.98020582458012  | 3.84798026733510  | 0.10958982593420  |
| H          | -0.31851940293694                | 2.27066058080078            | -1.80519888705988 | C  | 0.94493183361029  | 5.68098201327303  | 1.19653105861108  |
| C          | 1.17208032370166                 | 1.72059414994622            | -0.32253418614329 | C  | 1.76010121272174  | 5.73480166587195  | 2.33571118379486  |
| C          | 1.16310504242244                 | 1.29960619179213            | 1.13773474354652  | C  | 1.42743289359870  | 6.51297081567449  | 3.44102659564575  |
| C          | 0.68157764332892                 | 2.54220691722427            | 1.84936765229174  | C  | 0.26712860069652  | 7.29082945859980  | 3.40301037348731  |
| H          | 1.14378161649846                 | 2.89193677989031            | 2.77647780295226  | C  | -0.54990566987269 | 7.27173987257761  | 2.27820661015169  |
| C          | -1.23841380477504                | 0.65342614125773            | 0.81828736455210  | C  | -0.23401035372232 | 6.47088768872814  | 1.16961620857120  |
| H          | -1.63513542607788                | 0.02439710078715            | 0.00744817497587  | H  | 2.67441185511848  | 5.13830038304935  | 2.36800757913979  |
| H          | -1.97561575617009                | 0.62547414962626            | 1.63624707936658  | H  | 2.07602612669775  | 6.51995507899309  | 4.32010488472074  |
| C          | 0.13609759059397                 | 0.14513497457853            | 1.30834495858621  | H  | -0.00409937339257 | 7.91987312588152  | 4.25488805519954  |
| C          | -1.48509762388449                | 3.82946917059418            | 2.25669874722911  | H  | -1.45918100278986 | 7.87896875815106  | 2.24438551712484  |
| H          | -2.19800673802736                | 3.17773210319300            | 2.79162023245593  | C  | 4.07104891625452  | 4.92570211435790  | -1.00390569617030 |
| H          | -2.07452555819396                | 4.50755620714958            | 1.62370083901877  | C  | 3.02116452043248  | 4.36892578513721  | -1.97408809770083 |
| H          | -0.93352926670986                | 4.42187979057459            | 2.99854414360119  | C  | 3.28579033824004  | 6.00410769944486  | -0.27278683245905 |
| C          | 0.08139170626668                 | -0.40951029961406           | 2.74113863592947  | C  | 1.69261049639289  | 4.84092998702190  | -1.59210966322049 |
| H          | -0.36371967919665                | 0.37770438551214            | 3.37944234364500  | C  | 1.80182546458372  | 5.84217160739777  | -0.54362594590630 |
| C          | -0.82278434231155                | -1.63768272703722           | 2.80388817236643  | H  | 0.90649800424816  | 4.85965710104661  | -2.35451554258191 |
| H          | -1.83794889587293                | -1.42600025935018           | 2.43612820155669  | H  | 1.26273151575695  | 6.78559516028427  | -0.67796483471955 |
| H          | -0.91178451082995                | -2.00965695648578           | 3.83645155210213  | O  | 3.30802904227757  | 3.70775542626257  | -2.95576957339031 |
| H          | -0.40766727018682                | -2.45348941388892           | 2.18808331913679  | O  | 3.76926296683446  | 6.92170125230675  | 0.34510410245903  |
| C          | 1.46113693087483                 | -0.74658891007252           | 3.29771911464276  | C  | 5.23207387915050  | 5.53157975447986  | -1.78228371505091 |
| H          | 1.99660943771902                 | -1.43961642994266           | 2.62644835188025  | H  | 5.77176493910209  | 4.74156567935536  | -2.32397130706060 |
| H          | 1.37322189835719                 | -1.23608576489382           | 4.27997593337331  | H  | 4.87123546950586  | 6.26833799966336  | -2.51577961220064 |

|            |                                           |                   |                   |    |                   |                   |                   |
|------------|-------------------------------------------|-------------------|-------------------|----|-------------------|-------------------|-------------------|
| H          | 5.93003746578830                          | 6.03411775325938  | -1.09903633135922 | C  | 1.39714649270820  | -0.78368138579179 | 3.20941772421753  |
| C          | 4.53618713267818                          | 3.79168460467625  | -0.05181280734380 | H  | 1.93358097629830  | -1.46214295884479 | 2.52417396835956  |
| H          | 3.70508222215000                          | 3.53691531113795  | 0.62990664938399  | H  | 1.29376165853489  | -1.30051905851927 | 4.17602361415119  |
| H          | 4.69880916672300                          | 2.90670435268071  | -0.68277217812545 | H  | 2.03337720239134  | 0.09786516432046  | 3.37703822999609  |
| C          | 5.78930808822331                          | 4.07916194057624  | 0.72509255097288  | C  | 2.14634424330514  | 1.20854866915288  | -1.33912096776839 |
| C          | 7.02128848906902                          | 3.59392323632984  | 0.26639247385960  | C  | 4.35338478762190  | 0.01226153949257  | -1.49748026381931 |
| C          | 5.77130835903971                          | 4.83735647906630  | 1.90271909205377  | O  | 1.81832548204149  | 1.03605453241746  | -2.50964202429907 |
| C          | 8.20218311562761                          | 3.86231149936489  | 0.95798445806826  | H  | 2.12503382414237  | 1.00958303457973  | 1.46691036500140  |
| H          | 7.05122868349372                          | 2.99539056208795  | -0.64872158613856 | H  | -2.10261694022705 | 2.56735272478564  | -0.08609653857367 |
| C          | 6.94931420131465                          | 5.10955460593863  | 2.59646325613007  | N  | 3.33593711367892  | 0.83385893409454  | -0.82894463996168 |
| H          | 4.82411470184325                          | 5.22732296388402  | 2.27994840803925  | H  | 3.50150330629846  | 1.04360839072001  | 0.14687505901781  |
| C          | 8.17024869434746                          | 4.62454592104491  | 2.12569884385242  | C  | 3.74772252781110  | -1.34327948665525 | -1.87367384144124 |
| H          | 9.15206786326256                          | 3.47213367560809  | 0.58297490499229  | C  | 4.90008295404946  | 0.71705255452698  | -2.73918208171732 |
| H          | 6.91271803821546                          | 5.70406638140461  | 3.51313231477494  | C  | 5.47475362701981  | -0.18929344289693 | -0.48070456501790 |
| H          | 9.09386833027930                          | 4.83687694461432  | 2.67030906978164  | H  | 6.26218281578711  | -0.82647337133668 | -0.90793687691762 |
| N          | -1.01213971521092                         | 6.50742732439079  | 0.03315621201741  | H  | 5.92829054891472  | 0.77400506681091  | -0.19895452491345 |
| H          | -1.02209308536858                         | 5.66117238169185  | -0.52722127981458 | H  | 5.09494672700102  | -0.67783733560094 | 0.43098650040148  |
| H          | -1.92742693029016                         | 6.93246027594109  | 0.12563063037847  | H  | 5.68631308335941  | 0.09974032706923  | -3.19990702803955 |
|            |                                           |                   |                   | H  | 4.09982052212376  | 0.88531810199787  | -3.47052374653780 |
| <b>TS6</b> | <b>-312.46 cm**1 ***imaginary mode***</b> |                   |                   | H  | 5.3249775853451   | 1.69556121560110  | -2.47417402096093 |
| H          | 0.45437854502394                          | -0.62684152301975 | 0.55664142429793  | H  | 4.50858763085013  | -1.97968538702615 | -2.35034717027674 |
| C          | -0.59242148039659                         | 3.00279397383615  | 1.42333933672271  | H  | 3.37496525398219  | -1.86057202247880 | -0.97580691840727 |
| C          | -1.14099140036293                         | 2.17624395652180  | 0.27107756975935  | H  | 2.91224525560701  | -1.21203678691501 | -2.57501201551377 |
| C          | -0.05623644409802                         | 2.28007178735352  | -0.77377184808058 | Rh | 0.99300467309518  | 3.89717046651887  | 0.13493541761273  |
| H          | -0.28593441834567                         | 2.37468802125197  | -1.83782357470612 | C  | 0.97056943132751  | 5.71016493034884  | 1.25610541149384  |
| C          | 1.17679310684157                          | 1.78260708487674  | -0.34303811689753 | C  | 1.79675384314562  | 5.72896047980293  | 2.38931161578984  |
| C          | 1.14081059470075                          | 1.32675503684187  | 1.10643690937709  | C  | 1.47159407049449  | 6.47267959086113  | 3.52003167957827  |
| C          | 0.65445144131235                          | 2.55580302426692  | 1.83840869568370  | C  | 0.31289393506362  | 7.25443833164896  | 3.51285175976542  |
| H          | 1.10153814609472                          | 2.88093398940561  | 2.78181759747993  | C  | -0.50924126678039 | 7.27532420461252  | 2.39219902464451  |
| C          | -1.26048935677296                         | 0.70548126068575  | 0.73581194524846  | C  | -0.20304114919321 | 6.50705016308577  | 1.25756357716132  |
| H          | -1.65355494898862                         | 0.09565613456134  | -0.09133536825346 | H  | 2.71753336469855  | 5.13980995771131  | 2.39265376255714  |
| H          | -2.00700276567106                         | 0.66820817332202  | 1.54499089994576  | H  | 2.12590641209612  | 6.45334391895039  | 4.39471765754175  |
| C          | 0.10393702696643                          | 0.17547896947084  | 1.23126464552810  | H  | 0.04883050049710  | 7.85732911441216  | 4.38567467118353  |
| C          | -1.50835763548882                         | 3.84943817427524  | 2.24034314337450  | H  | -1.41559997717442 | 7.88783287022386  | 2.38237316293158  |
| H          | -2.23469672664028                         | 3.19156556169261  | 2.74902511647807  | C  | 4.11370743491482  | 4.99946805288609  | -0.82928120123344 |
| H          | -2.08242278443349                         | 4.54814936475033  | 1.61574905217707  | C  | 3.11451415692432  | 4.39461978357338  | -1.82059105666147 |
| H          | -0.96306507126215                         | 4.41923202522801  | 3.00425716944014  | C  | 3.28935578030669  | 6.09211523512304  | -0.16335342509520 |
| C          | 0.02685970753359                          | -0.41745964646483 | 2.64753849414658  | C  | 1.77093074842015  | 4.89552402307130  | -1.53130279066845 |
| H          | -0.41731283678683                         | 0.35693710383483  | 3.30201239276340  | C  | 1.82322819845483  | 5.90576821605624  | -0.48818034349605 |
| C          | -0.89035731626481                         | -1.63723854385678 | 2.66709549739849  | H  | 1.02327408087828  | 4.89583589336638  | -2.33135664634374 |
| H          | -1.89924380650246                         | -1.40439466813784 | 2.29498188650651  | H  | 1.26107023595655  | 6.83406250600221  | -0.63429532565579 |
| H          | -0.99388089889472                         | -2.03662684260563 | 3.68800717084297  | O  | 3.43865733328704  | 3.67074848712587  | -2.74429530088989 |
| H          | -0.47741042409410                         | -2.44008636477339 | 2.03308141052057  | O  | 3.74311672024928  | 7.00961570164198  | 0.47629791271293  |

|            |                                                      |                   |                   |    |                   |                   |                   |
|------------|------------------------------------------------------|-------------------|-------------------|----|-------------------|-------------------|-------------------|
| C          | 4.5562300373164                                      | 3.97587152969697  | 0.21955584745885  | H  | -2.99461655336892 | -0.97180190655203 | -0.67282861872790 |
| H          | 5.21388591136129                                     | 4.45379722282769  | 0.96128299372351  | H  | -3.91815912786461 | -1.49828198777167 | 0.75159820579312  |
| H          | 3.68779538516139                                     | 3.54399907329017  | 0.74499207809263  | H  | -2.35829019160428 | -2.26535734838647 | 0.36934869343081  |
| H          | 5.10324277209498                                     | 3.15518456443379  | -0.26665804601869 | C  | -2.11625036304936 | -0.77544403978871 | 2.68549573017690  |
| C          | 5.34440173785241                                     | 5.57654050582087  | -1.55411870431576 | H  | -1.44060998209045 | -1.64296118250258 | 2.77694101331399  |
| H          | 5.96153162552057                                     | 6.08197748170012  | -0.79488863589845 | H  | -3.11293064297884 | -1.09325697839412 | 3.02872565753773  |
| H          | 5.92499085845590                                     | 4.72407616033676  | -1.93753934285396 | H  | -1.76435852707225 | 0.00060588046189  | 3.38127091929241  |
| C          | 5.03844070806667                                     | 6.52434570266505  | -2.68563577463186 | C  | 2.65440529014020  | 0.47093328655979  | 1.43685518868096  |
| C          | 4.96710518877344                                     | 6.05855186705047  | -4.00586279498017 | C  | 3.90073461372491  | -0.19275374559811 | 3.51337598368664  |
| C          | 4.81404241937163                                     | 7.88826089725572  | -2.45134525610499 | O  | 3.46617026248553  | 0.00056997733872  | 0.64555935948167  |
| C          | 4.66885240988221                                     | 6.92299584444862  | -5.05793457705145 | H  | 0.13539627180552  | 0.52707288652889  | 2.59396234887938  |
| H          | 5.14125228550095                                     | 4.99879852655483  | -4.20440386483072 | H  | -0.12367562198471 | 2.52488652531009  | -1.72461287808084 |
| C          | 4.51283593369102                                     | 8.75587587181808  | -3.50145696744991 | N  | 2.77898905585178  | 0.40608809291865  | 2.77866498246881  |
| H          | 4.88091335326908                                     | 8.27381805673215  | -1.43140685060397 | H  | 2.10413101177444  | 0.93086648760506  | 3.32630224693983  |
| C          | 4.43602445749590                                     | 8.27599827003112  | -4.80907088294107 | C  | 4.03607124771934  | -1.67210244114495 | 3.14608807856153  |
| H          | 4.62012821138428                                     | 6.53688445420684  | -6.07971684350909 | C  | 5.19692079863348  | 0.56126989988571  | 3.20308643810029  |
| H          | 4.34364189570581                                     | 9.81635846812108  | -3.29655161509009 | C  | 3.56578765865594  | -0.05824631441940 | 4.99649221777995  |
| H          | 4.20226769518398                                     | 8.95525396970906  | -5.63307519262708 | H  | 4.37599379378921  | -0.48414445563329 | 5.60548606298373  |
| N          | -0.98839869999061                                    | 6.58217146812390  | 0.12761909325071  | H  | 3.44565469398364  | 1.00013128349474  | 5.27794908291961  |
| H          | -1.00999022418781                                    | 5.75242341777424  | -0.45671723279973 | H  | 2.63365619969131  | -0.59221661672964 | 5.23881174749701  |
| H          | -1.90040079029109                                    | 7.00930186755790  | 0.24063043951956  | H  | 6.04276540413093  | 0.09647528844533  | 3.73190073562090  |
|            |                                                      |                   |                   | H  | 5.40663558812839  | 0.54543836719163  | 2.12481651741512  |
| <b>TS7</b> | <b>-317.73 cm**<sub>1</sub> ***imaginary mode***</b> |                   |                   | H  | 5.12280932598348  | 1.60906089652659  | 3.53301984268686  |
| H          | -0.23720662549199                                    | -0.91165437683886 | 0.57277797411620  | H  | 4.84677415767513  | -2.13041870521429 | 3.73227197362471  |
| C          | -0.62826839266038                                    | 2.93704955921305  | 0.35463216456259  | H  | 3.10125574009301  | -2.20987590153615 | 3.36741147851371  |
| C          | -0.08029932556417                                    | 2.03642418817854  | -0.74241463473487 | H  | 4.26289736315588  | -1.78901812844301 | 2.07840365047648  |
| C          | 1.33925041840136                                     | 1.78042431403719  | -0.29647167936283 | Rh | 1.40562139289825  | 3.26905238587638  | 1.26762371601527  |
| H          | 2.18308166756505                                     | 1.79402974591505  | -0.99090147602731 | C  | 0.93561007763362  | 4.87420169036720  | 2.58096277234732  |
| C          | 1.41696162989293                                     | 1.17479987558336  | 0.95956944540867  | C  | 0.14283190570335  | 5.94797423286837  | 2.16580744800307  |
| C          | 0.04944259814277                                     | 0.95403728829409  | 1.58940390774045  | C  | -0.74502473215864 | 6.58037732388029  | 3.03427970597948  |
| C          | -0.53829842644348                                    | 2.35283383247303  | 1.61012590170948  | C  | -0.82735241123913 | 6.14602167196705  | 4.35749805809096  |
| H          | -1.07554579487093                                    | 2.74488155372439  | 2.47777346432567  | C  | -0.02601463056038 | 5.09780298133229  | 4.80186504171039  |
| C          | -0.87864834166799                                    | 0.71315746420675  | -0.72849164388107 | C  | 0.87294466498009  | 4.45566600859557  | 3.93734127810269  |
| H          | -0.49703967174218                                    | 0.05229002606317  | -1.5209958341274  | H  | 0.21379693532287  | 6.29376947939956  | 1.13367581426039  |
| H          | -1.92522377519561                                    | 0.94571158451108  | -0.98198154413861 | H  | -1.36183165935246 | 7.40887040389135  | 2.67852844878938  |
| C          | -0.79327980666010                                    | 0.03909386681554  | 0.65923312010166  | H  | -1.51012965028448 | 6.63432313941152  | 5.05773547198570  |
| C          | -1.48197943731862                                    | 4.10612376136812  | 0.00155569703719  | H  | -0.07923455764273 | 4.76592360053287  | 5.84304950394113  |
| H          | -2.36379411116798                                    | 3.75016329351064  | -0.55949115574094 | C  | 3.45476427672064  | 5.23703850376469  | -0.45346696180004 |
| H          | -0.94895558268773                                    | 4.81208975853532  | -0.65352944902727 | C  | 2.86486496007368  | 5.91067530309377  | 0.77897174842794  |
| H          | -1.83155259292953                                    | 4.64233252364548  | 0.89317703888867  | C  | 3.87455154664312  | 3.86339279832928  | 0.07939353905396  |
| C          | -2.17891417586360                                    | -0.28352641688513 | 1.24283459647436  | C  | 2.78401876542870  | 4.92580338868478  | 1.92724459505805  |
| H          | -2.76452927787802                                    | 0.65557968127466  | 1.22699636120192  | C  | 3.44138937592969  | 3.71567118687907  | 1.46441377093638  |
| C          | -2.90283218508530                                    | -1.30600116078149 | 0.37146611797014  | H  | 3.05939331669093  | 5.35483825507720  | 2.89586194622665  |

|            |                                                      |                   |                   |    |                   |                   |                   |
|------------|------------------------------------------------------|-------------------|-------------------|----|-------------------|-------------------|-------------------|
| H          | 3.97372347191434                                     | 3.02293792429470  | 2.12236309930378  | C  | -2.18738672956392 | -0.34587785917642 | 1.25110337457251  |
| O          | 2.60259028278205                                     | 7.08705563247981  | 0.86822257575617  | H  | -2.80268370054745 | 0.57391454428055  | 1.27728270413924  |
| O          | 4.52348533340043                                     | 3.06845682498497  | -0.58270059777205 | C  | -2.88565478874593 | -1.35568523939122 | 0.34438199728505  |
| C          | 4.70463855545215                                     | 5.99560650434315  | -0.89898841167392 | H  | -2.99803476235167 | -0.98272069008605 | -0.68468226695225 |
| H          | 4.44713703562908                                     | 7.02246246110157  | -1.19244296740475 | H  | -3.89057888730291 | -1.59710884575817 | 0.72412526290173  |
| H          | 5.44603345898106                                     | 6.04221564501573  | -0.08654571044047 | H  | -2.30942907303385 | -2.29527024254865 | 0.29853666835743  |
| H          | 5.16435595611569                                     | 5.48250316450187  | -1.75613952041784 | C  | -2.09641220476427 | -0.89239240670150 | 2.67219475421858  |
| C          | 2.43978231908493                                     | 5.04823905606797  | -1.60601775559433 | H  | -1.39912947968898 | -1.74611345304520 | 2.72291407618284  |
| H          | 2.88813181849755                                     | 4.30075182917502  | -2.27994227025694 | H  | -3.08118759565202 | -1.24815401367652 | 3.01265857946370  |
| H          | 1.52580295799656                                     | 4.59642966660497  | -1.18590452198631 | H  | -1.75528185567341 | -0.13556434596249 | 3.39396408213815  |
| C          | 2.10401510129251                                     | 6.28723179891519  | -2.38505975133252 | C  | 2.60435846019828  | 0.48539374271271  | 1.41131932392758  |
| C          | 1.06302233011189                                     | 7.13689781251810  | -1.99090084618698 | C  | 3.97406960440207  | -0.11738191358293 | 3.42347979367544  |
| C          | 2.84123577946478                                     | 6.62560162422272  | -3.52780150356212 | O  | 3.30275354990889  | -0.11144848691812 | 0.59687286675834  |
| C          | 0.77486280305858                                     | 8.29666317694737  | -2.70939100573304 | H  | 0.12853219523833  | 0.48714720633139  | 2.61196956733007  |
| H          | 0.46718846513136                                     | 6.88441170940306  | -1.11036470458515 | H  | -0.24395477240818 | 2.62850643527485  | -1.62934683159268 |
| C          | 2.55809954852554                                     | 7.78485960078979  | -4.24871092326172 | N  | 2.84758773379463  | 0.52789129717640  | 2.73652849018171  |
| H          | 3.64819824544168                                     | 5.96543210140410  | -3.85810429924301 | H  | 2.25329337773580  | 1.1399697864709   | 3.29123433180804  |
| C          | 1.52472087536841                                     | 8.62759246137324  | -3.83885511689730 | C  | 3.89956292089915  | -1.63331140999825 | 3.22545279023581  |
| H          | -0.04331345201326                                    | 8.94572858186570  | -2.38659420467093 | C  | 5.30284308773440  | 0.43097044378947  | 2.89517456371002  |
| H          | 3.14603107316574                                     | 8.02874952101826  | -5.13761597631988 | C  | 3.83311967865000  | 0.21589560830650  | 4.90624620307469  |
| H          | 1.29948024555411                                     | 9.53636479653143  | -4.40297510096230 | H  | 4.64084915689366  | -0.26525250661758 | 5.47613167808978  |
| N          | 1.64327300904584                                     | 3.40249533833048  | 4.40089536093337  | H  | 3.89829463205160  | 1.30230930708852  | 5.07404462725923  |
| H          | 2.50184682477863                                     | 3.21657509653358  | 3.89396491691523  | H  | 2.87010606919313  | -0.14300947086212 | 5.30213139831803  |
| H          | 1.78608444624993                                     | 3.37951927462912  | 5.40514230599943  | H  | 6.14399449582330  | -0.06060273674755 | 3.40699720856463  |
| <b>TS8</b> | <b>-314.45 cm**<sub>1</sub> ***imaginary mode***</b> |                   |                   | H  | 5.39415493780766  | 0.25187972247668  | 1.81556755384435  |
| H          | -0.23521097164301                                    | -0.88798380681824 | 0.54128687965728  | H  | 5.37627650859760  | 1.51413762380443  | 3.07895482935424  |
| C          | -0.72683554981514                                    | 2.95423835567066  | 0.46974913370614  | H  | 4.72307701128754  | -2.12527107849085 | 3.76483069062387  |
| C          | -0.17457766828336                                    | 2.10714321711246  | -0.66579991530861 | H  | 2.94696146714497  | -2.02486502754515 | 3.61449336124081  |
| C          | 1.25605607243251                                     | 1.86746343145319  | -0.24901655971102 | H  | 3.97488324570684  | -1.89000849901155 | 2.16030544530293  |
| H          | 2.08730479432510                                     | 1.92356748607275  | -0.95628631275423 | Rh | 1.31958608983806  | 3.29093666109617  | 1.37508268524517  |
| C          | 1.36515416153841                                     | 1.21884381014578  | 0.98285158067374  | C  | 0.85410259905449  | 4.83054968177093  | 2.76831763447341  |
| C          | 0.01098851194617                                     | 0.94494964739550  | 1.62410736399114  | C  | -0.02026417722640 | 5.86988215685398  | 2.44238306993516  |
| C          | -0.60878150088148                                    | 2.32791844676310  | 1.70153994482577  | C  | -0.91482762146922 | 6.38971229681748  | 3.37682737948102  |
| H          | -1.13939722792787                                    | 2.67944663262312  | 2.59039069581086  | C  | -0.92288805902367 | 5.87485958663970  | 4.67268400769527  |
| C          | -0.93887116171313                                    | 0.76426715486566  | -0.69073724098654 | C  | -0.03220671508292 | 4.86545329865893  | 5.02890986630411  |
| H          | -0.54924596234653                                    | 0.14409876272774  | -1.51177959934436 | C  | 0.87940752870077  | 4.34193422067107  | 4.10097226594127  |
| H          | -1.99423939188190                                    | 0.97775857526103  | -0.92371725298967 | H  | -0.01157686558232 | 6.27749591998211  | 1.43093789473624  |
| C          | -0.81812068780360                                    | 0.04169369643303  | 0.66964752577104  | H  | -1.59874021772142 | 7.19234705923725  | 3.09101442710155  |
| C          | -1.59825081780756                                    | 4.12413733139647  | 0.16832393501849  | H  | -1.61378505894274 | 6.27148961782453  | 5.42114467401610  |
| H          | -2.47231169387288                                    | 3.78119869972980  | -0.41255163180323 | H  | -0.02250377884751 | 4.47422047277292  | 6.05059322996802  |
| H          | -1.07268738272163                                    | 4.86758823640992  | -0.45126191052657 | C  | 3.25291046899200  | 5.25698892111101  | -0.41193186347895 |
| H          | -1.95908438342409                                    | 4.61265597467735  | 1.08243750968146  | C  | 2.59731187596391  | 5.91040071899186  | 0.79804346360970  |
|            |                                                      |                   |                   | C  | 3.70201452412284  | 3.89845974046829  | 0.12509456532668  |

|            |                                            |                   |                   |    |                   |                   |                   |
|------------|--------------------------------------------|-------------------|-------------------|----|-------------------|-------------------|-------------------|
| C          | 2.66122602076011                           | 4.98638449923835  | 1.99189887489711  | H  | -1.90595786799549 | 3.01969611625304  | 2.96535484089776  |
| C          | 3.34722510495251                           | 3.78978005209714  | 1.53441386566264  | H  | -1.78553541024883 | 4.48406062513606  | 1.96564191089800  |
| H          | 2.95823950018131                           | 5.47101010137732  | 2.92772486625174  | H  | -0.65671989681536 | 4.23793472860613  | 3.33074590122173  |
| H          | 3.91752167381948                           | 3.12143302089141  | 2.18521484785885  | C  | 0.68637018212486  | -0.27066532332870 | 2.90740173069931  |
| O          | 2.15698302570210                           | 7.03728236043856  | 0.80777346613190  | H  | 0.22052512864052  | 0.50211964184915  | 3.54851279014080  |
| O          | 4.32079649477720                           | 3.08506680201595  | -0.54739145993105 | C  | -0.11043851332847 | -1.56230751933941 | 3.07002468956009  |
| C          | 2.29940244458582                           | 5.14816109016496  | -1.59509129196827 | H  | -1.15976781887891 | -1.44573016535571 | 2.75962328679779  |
| H          | 2.79032302895937                           | 4.60818169953966  | -2.41844231721909 | H  | -0.10757665273614 | -1.89946434060395 | 4.11831105181837  |
| H          | 1.38652434485763                           | 4.60118112070916  | -1.31466943708699 | H  | 0.33106891503044  | -2.36664766259525 | 2.45745924498666  |
| H          | 2.01363478848823                           | 6.14994286360665  | -1.94897062085734 | C  | 2.12175979166254  | -0.47703717200961 | 3.38099568149163  |
| C          | 4.50531975970148                           | 6.07290974476808  | -0.81843872739507 | H  | 2.66894055674463  | -1.14612865018376 | 2.69530700647493  |
| H          | 4.94197415784491                           | 5.57092646704877  | -1.69547212960165 | H  | 2.13652441591105  | -0.93903186169178 | 4.38034901989237  |
| H          | 4.15912636885376                           | 7.06807447956227  | -1.13840395931276 | H  | 2.68276972629725  | 0.46680552035842  | 3.44809454951561  |
| C          | 5.54329171465548                           | 6.20694293651015  | 0.26435076643938  | C  | 2.30313755397014  | 1.08325331502187  | -1.2532566689097  |
| C          | 5.49210403307006                           | 7.26235519357638  | 1.18498510376155  | C  | 2.78556659795440  | 0.66379406587197  | -3.67802245823835 |
| C          | 6.57065017563491                           | 5.26193860258741  | 0.39233734206658  | O  | 3.01998011367875  | 0.17766733830207  | -0.82731603715168 |
| C          | 6.43544662514948                           | 7.36738366341686  | 2.20726921217674  | H  | 2.58963347760355  | 1.19183373736540  | 1.40429480147791  |
| H          | 4.70462441819001                           | 8.01520283556800  | 1.09467470495312  | H  | -1.86494971720155 | 2.41259680911327  | 0.25465638756666  |
| C          | 7.51485682265297                           | 5.36384754007544  | 1.41303631140905  | N  | 2.17226528301189  | 1.38680249918738  | -2.55419151633469 |
| H          | 6.62536759116192                           | 4.43421711178962  | -0.31904024291894 | H  | 1.69577982537483  | 2.25065477820667  | -2.78451672114087 |
| C          | 7.44906303559647                           | 6.41629528904526  | 2.32679503062305  | C  | 4.31261247981292  | 0.75543200924975  | -3.62457100171128 |
| H          | 6.38151280301748                           | 8.20190682847187  | 2.91136191555219  | C  | 2.33540596491166  | -0.79891203892090 | -3.65465707037342 |
| H          | 8.31070352505228                           | 4.61830290169501  | 1.49149182006609  | C  | 2.27462679489205  | 1.34028094273436  | -4.94794094016677 |
| H          | 8.19103470038800                           | 6.49919063252903  | 3.12522539181155  | H  | 2.70600953249643  | 0.85330263501680  | -5.83426059070642 |
| N          | 1.74397715232967                           | 3.32101241419466  | 4.47989085479970  | H  | 1.17744195149864  | 1.26984609464331  | -5.01545025143282 |
| H          | 2.64595042470088                           | 3.32247295056245  | 4.01445148373690  | H  | 2.56021288263401  | 2.40275816304093  | -4.95813949385138 |
| H          | 1.86407101868523                           | 3.22990555993561  | 5.48405777801263  | H  | 2.75278027492567  | -1.33265768001959 | -4.52177921068242 |
|            |                                            |                   |                   | H  | 2.67745109162244  | -1.29713231166575 | -2.73780524955788 |
| <b>TS9</b> | <b>-238.36 cm**-1 ***imaginary mode***</b> |                   |                   | H  | 1.23742831464376  | -0.86466464028394 | -3.70245446726439 |
| H          | 0.96503374905366                           | -0.58513525534308 | 0.80388374355845  | H  | 4.75110071784557  | 0.20759447001718  | -4.47249085895632 |
| C          | -0.27173826612174                          | 2.98071968407754  | 1.62469574301437  | H  | 4.63033642865993  | 1.80611098185726  | -3.68279964034265 |
| C          | -0.85203721744945                          | 2.09573701873736  | 0.53486576410516  | H  | 4.69584557358329  | 0.31941483672835  | -2.69211018952170 |
| C          | 0.12358775152018                           | 2.23350993329083  | -0.61136713481784 | Rh | 1.07136042073469  | 4.00830119049331  | 0.17692373759419  |
| H          | -0.23161827335016                          | 2.28363466785509  | -1.64465312557283 | C  | 0.60997974154212  | 5.81726696235388  | 1.05622358357609  |
| C          | 1.41147200736512                           | 1.80799499375285  | -0.28501971001865 | C  | -0.42688223809257 | 6.37055784761176  | 0.29397193381354  |
| C          | 1.54895838532322                           | 1.43870223042237  | 1.17291203999016  | C  | -1.37190682767096 | 7.22638331805891  | 0.86215918828363  |
| C          | 1.04418841952171                           | 2.65046870708770  | 1.91850547315062  | C  | -1.22412295965168 | 7.59435075038713  | 2.19988000824877  |
| H          | 1.54637013942629                           | 3.03565543058758  | 2.80953413354167  | C  | -0.15957502523905 | 7.10620556611792  | 2.95140009824023  |
| C          | -0.82605186067336                          | 0.63296441086968  | 1.04444880467616  | C  | 0.77994448548318  | 6.21195663682426  | 2.40665672917993  |
| H          | -1.22356838698453                          | -0.02769321383350 | 0.25956433474876  | H  | -0.50789111694359 | 6.1216727238796   | -0.76873159144601 |
| H          | -1.51450334924518                          | 0.56407693959253  | 1.90161896116502  | H  | -2.19096708960471 | 7.62037866802176  | 0.25637483608305  |
| C          | 0.60627286064290                           | 0.22947026579073  | 1.45596165647794  | H  | -1.93279141768095 | 8.28689478419652  | 2.66180777362302  |
| C          | -1.19633016640348                          | 3.73735327414183  | 2.51831692968655  | H  | -0.04103316973189 | 7.41015265223645  | 3.99579370104680  |

|             |                                             |                   |                   |    |                   |                   |                   |
|-------------|---------------------------------------------|-------------------|-------------------|----|-------------------|-------------------|-------------------|
| C           | 4.22448964597288                            | 4.41732385165760  | -0.82865018546731 | H  | -1.52694711688870 | 0.55244535062923  | 1.99699135677462  |
| C           | 3.10639114116136                            | 4.46073842401373  | -1.87970382983693 | C  | 0.56588687669547  | 0.17950149753822  | 1.45682057555334  |
| C           | 3.55851817622087                            | 5.05065652447441  | 0.38157895666009  | C  | -1.12190746188212 | 3.71310878660576  | 2.62013757462212  |
| C           | 1.97667406122071                            | 5.22017457959728  | -1.35938956099674 | H  | -1.82876626864830 | 3.00552576561630  | 3.08707292879514  |
| C           | 2.32409660634110                            | 5.77830535589696  | -0.07217770284249 | H  | -1.71570046645243 | 4.47858369475634  | 2.09913469898895  |
| H           | 1.29062611062544                            | 5.70120145420236  | -2.06143851803323 | H  | -0.53859132490830 | 4.19167213973099  | 3.41549260958215  |
| H           | 2.29170546421038                            | 6.84317329833624  | 0.16603692400386  | C  | 0.69959000049994  | -0.33681516938480 | 2.89853112779158  |
| O           | 3.22203668892193                            | 4.00113997597164  | -3.00382516147818 | H  | 0.28186266629232  | 0.44010773921619  | 3.56717387328807  |
| O           | 4.02492995300802                            | 5.05124905075799  | 1.50902828601434  | C  | -0.11876709727186 | -1.61162543255389 | 3.08572414266112  |
| C           | 5.31134640605872                            | 5.38470746832000  | -1.32767518471078 | H  | -1.17814914624898 | -1.46813294855293 | 2.82494018531273  |
| H           | 5.76019093453431                            | 4.97939475014319  | -2.24646150416315 | H  | -0.07563316580049 | -1.95959477190734 | 4.12956369972233  |
| H           | 4.89085009408705                            | 6.37642069154642  | -1.55477672878370 | H  | 0.27574485981204  | -2.41928968559578 | 2.44608189107607  |
| H           | 6.10049285049424                            | 5.50178627530072  | -0.57207320634586 | C  | 2.14960759763744  | -0.58142053064372 | 3.30461404731963  |
| C           | 4.76156153649276                            | 2.99486815345215  | -0.59446730776307 | H  | 2.64912183223184  | -1.25707553518427 | 2.58952163893884  |
| H           | 4.12184692410659                            | 2.50327097564702  | 0.15201365915555  | H  | 2.19808627494498  | -1.05352801822678 | 4.29817226052088  |
| H           | 4.62233044009856                            | 2.45259903550947  | -1.53788187953679 | H  | 2.73613822558909  | 0.34788299475806  | 3.35480463086781  |
| C           | 6.20429813119466                            | 2.86095192928618  | -0.18634341030850 | C  | 2.16454133265255  | 1.03874502188417  | -1.32368906165870 |
| C           | 7.15399213471329                            | 2.41694546738708  | -1.11488408699439 | C  | 2.57291742355886  | 0.69182398684619  | -3.77219303897692 |
| C           | 6.63364569181920                            | 3.15184777072103  | 1.11577551758901  | O  | 2.88365369428244  | 0.11337844120370  | -0.94609949289607 |
| C           | 8.49480024815143                            | 2.26641869927915  | -0.75853184097133 | H  | 2.56342218108642  | 1.10373855526750  | 1.32894903736473  |
| H           | 6.83369555846561                            | 2.17943105544505  | -2.13345573689044 | H  | -1.91139098483629 | 2.42001594037425  | 0.37843579375634  |
| C           | 7.97214182196140                            | 3.00283790454084  | 1.47585897369573  | N  | 1.98640467014131  | 1.37543972133778  | -2.61039723813104 |
| H           | 5.90442288974284                            | 3.51365226981332  | 1.84392074305164  | H  | 1.51175006560416  | 2.25041639545344  | -2.79860416351169 |
| C           | 8.90885499215496                            | 2.55881554567017  | 0.54033772217497  | C  | 4.10069936285242  | 0.77942795607960  | -3.74007515755098 |
| H           | 9.21786991307623                            | 1.91483732491901  | -1.49945567673822 | C  | 2.11640308909683  | -0.76862451244437 | -3.79415638420490 |
| H           | 8.28775939411673                            | 3.23295569167841  | 2.49715875638904  | C  | 2.04102138607748  | 1.41804592219148  | -5.00570916833222 |
| H           | 9.95754941987666                            | 2.43870357083714  | 0.82465100653367  | H  | 2.44811701022047  | 0.95954542916610  | -5.91832143582616 |
| N           | 1.78931717043674                            | 5.69731192760342  | 3.17845139065453  | H  | 0.94190514955398  | 1.35968049648710  | -5.05157441208030 |
| H           | 2.64295224268436                            | 5.42390963471892  | 2.68490248149307  | H  | 2.33707061255529  | 2.47730799422258  | -4.98323889573733 |
| H           | 1.96801754395429                            | 6.19038756499231  | 4.04592236338118  | H  | 2.51760991907225  | -1.27245262045935 | -4.68647186301911 |
| <b>TS10</b> | <b>-235.90 cm** -1 ***imaginary mode***</b> |                   |                   | H  | 2.47121599779069  | -1.30056124022407 | -2.90130128210876 |
| H           | 0.87876854289394                            | -0.63528229850256 | 0.78175080305473  | H  | 1.01750225609203  | -0.82894109250114 | -3.82645115827427 |
| C           | -0.25019626854712                           | 2.94761840538995  | 1.68185250790830  | H  | 4.52469212598121  | 0.28331970404340  | -4.62644489678359 |
| C           | -0.89395933634497                           | 2.08126824863801  | 0.61301723993845  | H  | 4.41143673579622  | 1.83342975861557  | -3.73626365302415 |
| C           | 0.03439138387333                            | 2.20907890008717  | -0.57211985456209 | H  | 4.49685587665442  | 0.28901885976841  | -2.84057939771710 |
| H           | -0.36337645378939                           | 2.27856121773036  | -1.58863297938426 | Rh | 1.05666047415986  | 3.95813211211384  | 0.18776189538469  |
| C           | 1.32608786655254                            | 1.75715456377367  | -0.30528202999450 | C  | 0.63242512678788  | 5.77214919849480  | 1.07513674627536  |
| C           | 1.51897969447547                            | 1.37231262651699  | 1.14293936170161  | C  | -0.41799249683150 | 6.32856977498812  | 0.33430018083877  |
| C           | 1.07064956634289                            | 2.58938175646210  | 1.91707032609365  | C  | -1.34551302862063 | 7.19145149614794  | 0.92084360218075  |
| H           | 1.61611163499373                            | 2.95817791054304  | 2.78949688285141  | C  | -1.16481359745954 | 7.56431922832854  | 2.25317800695732  |
| C           | -0.87480645647938                           | 0.61462747003689  | 1.11137667183699  | C  | -0.08488550745253 | 7.07418476461773  | 2.98121326044665  |
| H           | -1.31916854239307                           | -0.03254551593881 | 0.34048017263207  | C  | 0.83675895304697  | 6.17241778964443  | 2.41868932703289  |
|             |                                             |                   |                   | H  | -0.52419825952420 | 6.07582729084856  | -0.72543051469142 |

|             |                                                       |                   |                   |    |                   |                   |                   |
|-------------|-------------------------------------------------------|-------------------|-------------------|----|-------------------|-------------------|-------------------|
| H           | -2.17657846549000                                     | 7.58700508822690  | 0.33265476994307  | H  | -1.23859283735638 | 3.15262578782692  | 2.07541521748136  |
| H           | -1.85944769280911                                     | 8.26173347655637  | 2.72891191574649  | C  | -0.67393380965487 | 0.78244316822098  | -0.83687084727632 |
| H           | 0.05945405638534                                      | 7.38137542574769  | 4.02145730738601  | H  | -0.19880106633708 | 0.03728096458043  | -1.49225089555698 |
| C           | 4.19725732468653                                      | 4.32193991208158  | -0.85923107001533 | H  | -1.66989698711665 | 0.99067498457705  | -1.25892994734526 |
| C           | 3.08056417414908                                      | 4.38304875965849  | -1.90528818001374 | C  | -0.79258861741280 | 0.27111784647986  | 0.61478992764550  |
| C           | 3.55900012725909                                      | 4.99235743760080  | 0.34550885154124  | C  | -1.27384069344191 | 4.24450336850788  | -0.57842500749787 |
| C           | 1.95562575326445                                      | 5.14492596853260  | -1.37458255876549 | H  | -2.13142718557702 | 3.83241360264026  | -1.13895653631873 |
| C           | 2.32039031472514                                      | 5.71397229858430  | -0.09648994027439 | H  | -0.65600266206073 | 4.80289294006504  | -1.29774844364399 |
| H           | 1.26685759782437                                      | 5.62558467301375  | -2.07430211357923 | H  | -1.63841818695338 | 4.94323309226112  | 0.18389758335923  |
| H           | 2.29525097302055                                      | 6.78099952556732  | 0.13109505093290  | C  | -2.25351906260428 | 0.05220764226591  | 1.04067166456984  |
| O           | 3.18990787675536                                      | 3.94224002485213  | -3.03846830527441 | H  | -2.79705985024517 | 0.99332413002640  | 0.83052225084621  |
| O           | 4.06333748887131                                      | 5.01671638081846  | 1.45653392239142  | C  | -2.89392728888361 | -1.05643536173055 | 0.20981771556125  |
| C           | 4.73681993784186                                      | 2.93718534499593  | -0.54914837953332 | H  | -2.83098463229147 | -0.85557355931261 | -0.87026580680435 |
| H           | 5.57861069374615                                      | 3.01800245937275  | 0.15387102241687  | H  | -3.95816066553854 | -1.17596854204424 | 0.46593580628823  |
| H           | 3.97092508675945                                      | 2.29977429470577  | -0.09276617610029 | H  | -2.39260010733496 | -2.02033705830041 | 0.40050493848187  |
| H           | 5.09248111238890                                      | 2.44953758543077  | -1.46689178365640 | C  | -2.39900072629904 | -0.25430500416931 | 2.52753594909984  |
| C           | 5.37315072033578                                      | 5.21423755133377  | -1.35245763618023 | H  | -1.77713893247169 | -1.11935672467512 | 2.81431047910873  |
| H           | 6.14817765380635                                      | 5.18178642153758  | -0.57124586775404 | H  | -3.44414155086995 | -0.50175528151336 | 2.77030450277660  |
| H           | 5.78214106925268                                      | 4.72181603966676  | -2.24841019607426 | H  | -2.10735380287871 | 0.59518649704373  | 3.16267340352496  |
| C           | 5.01791516545162                                      | 6.64125085384862  | -1.66410938172387 | C  | 2.46457320477388  | 0.71669356730997  | 1.87059344364251  |
| C           | 4.58366231875098                                      | 7.01107400620570  | -2.94366542499965 | C  | 4.90619581924786  | 0.29402169685181  | 2.14222598436379  |
| C           | 5.09130648420016                                      | 7.62850598342227  | -0.67260430264326 | O  | 2.12944353040103  | 0.05270457663291  | 2.85217366649450  |
| C           | 4.22565234350806                                      | 8.32900437482375  | -3.22328606295252 | H  | -0.05651964578660 | 0.95362612395481  | 2.58066897590751  |
| H           | 4.52650097557976                                      | 6.25191225406039  | -3.72803546576885 | H  | 0.23209566975690  | 2.46116666410556  | -1.91819526741363 |
| C           | 4.73508722146650                                      | 8.94802959412089  | -0.94916146244828 | N  | 3.73490618028222  | 0.85568800409022  | 1.45309481167359  |
| H           | 5.43744821921787                                      | 7.35810630976772  | 0.32907495435608  | H  | 3.94270411148783  | 1.53476997296184  | 0.71660957404843  |
| C           | 4.29911817836019                                      | 9.30240276792575  | -2.22610277921626 | C  | 5.03086565153517  | 0.90200993887144  | 3.54228681138744  |
| H           | 3.89330668869161                                      | 8.59918536413544  | -4.22912019617775 | C  | 4.79687620068531  | -1.23045834329155 | 2.21898840729491  |
| H           | 4.80548633488292                                      | 9.70507769927708  | -0.16372551043225 | C  | 6.13004382270409  | 0.66911852680940  | 1.30881591471441  |
| H           | 4.02446157666156                                      | 10.33715713608301 | -2.44632417542534 | H  | 7.03879322006500  | 0.27031086439355  | 1.78221484336555  |
| N           | 1.85986702804066                                      | 5.65320605333521  | 3.17017355100097  | H  | 6.05646171306354  | 0.24987625546657  | 0.29322708764020  |
| H           | 2.70364515236302                                      | 5.38379715357522  | 2.65779985284138  | H  | 6.22957285300285  | 1.76051924149791  | 1.21938068981296  |
| H           | 2.05876354453284                                      | 6.14940250710045  | 4.03155230084824  | H  | 5.69655903016779  | -1.64532857422484 | 2.69822870375139  |
| <b>TS11</b> | <b>-242.98 cm**<sup>-1</sup> ***imaginary mode***</b> |                   |                   | H  | 3.91570682802916  | -1.53297031444496 | 2.79874782693567  |
| H           | -0.26655587957512                                     | -0.69502444701082 | 0.71275980475738  | H  | 4.71621042586024  | -1.65907413049762 | 1.20789188619085  |
| C           | -0.50923115333733                                     | 3.11610821611831  | 0.02195642081617  | H  | 5.91854962665612  | 0.50036599717858  | 4.05419981368404  |
| C           | 0.14673898704806                                      | 2.09072170362580  | -0.88878969809777 | H  | 5.13571845463541  | 1.99618157276754  | 3.47621929482385  |
| C           | 1.49566284821353                                      | 1.87853506787244  | -0.24505279378427 | H  | 4.14280127075349  | 0.66980338223670  | 4.14551024517258  |
| H           | 2.40821514897857                                      | 1.80396538692987  | -0.84190100489706 | Rh | 1.38843952591715  | 3.53715492677186  | 1.20051123979092  |
| C           | 1.39630618461804                                      | 1.40467144358440  | 1.06532611703731  | C  | 0.92625495084196  | 5.01376630624532  | 2.58693573918085  |
| C           | -0.04154034464291                                     | 1.27097083474472  | 1.53427418431708  | C  | 1.39085806250230  | 4.41327648105106  | 3.76321756974719  |
| C           | -0.59706660853215                                     | 2.66940338997535  | 1.33404410578333  | C  | 0.75757273226993  | 4.63091308510551  | 4.98927224906683  |
|             |                                                       |                   |                   | C  | -0.30741368056181 | 5.52992514661560  | 5.03861596661176  |

|             |                       |                             |                   |    |                   |                   |                   |
|-------------|-----------------------|-----------------------------|-------------------|----|-------------------|-------------------|-------------------|
| C           | -0.71989506152033     | 6.20026713587199            | 3.89096569399270  | C  | 1.27810937319688  | 1.42512563325276  | 1.03513089653821  |
| C           | -0.10608735780973     | 5.98090057207524            | 2.64173472879890  | C  | -0.11282101283601 | 1.20635260026897  | 1.60459536870348  |
| H           | 2.25775664419808      | 3.74397892306884            | 3.72593967112955  | C  | -0.75054294747178 | 2.58043510739475  | 1.49205449923079  |
| H           | 1.11362051435254      | 4.1257827955391             | 5.88968042101479  | H  | -1.34976250278335 | 3.01288997823498  | 2.29740534835555  |
| H           | -0.80982567821444     | 5.73611085834614            | 5.98748875746130  | C  | -0.90523855547370 | 0.75549794666129  | -0.72533398762057 |
| H           | -1.53814126897418     | 6.92474162091863            | 3.94370503826105  | H  | -0.45450524744299 | 0.05605031471483  | -1.44519088492639 |
| C           | 3.28321344858363      | 4.99475940270659            | -0.98765535915203 | H  | -1.94256125376048 | 0.92804062065400  | -1.05409672494958 |
| C           | 2.26686088619399      | 5.72900430188580            | -0.12510966357245 | C  | -0.87361491617304 | 0.19130347071288  | 0.71072179189611  |
| C           | 3.81439154420920      | 3.93601906365253            | -0.01863597703820 | C  | -1.62772505701433 | 4.18648748487263  | -0.31119341947228 |
| C           | 2.52909877907895      | 5.41137356310047            | 1.31969044372330  | H  | -2.51253840071966 | 3.76413311429464  | -0.81932215037261 |
| C           | 3.39676138094938      | 4.25791632132360            | 1.33845491752084  | H  | -1.08265638743441 | 4.78479508268279  | -1.05680746118931 |
| H           | 2.62294787806325      | 6.26835745028739            | 1.98936783628813  | H  | -1.95383056399876 | 4.85059404416950  | 0.49829226979900  |
| H           | 3.98593170395374      | 3.93705806871138            | 2.20017615057920  | C  | -2.27638514352080 | -0.14456675439679 | 1.24237712952125  |
| O           | 1.45128487533939      | 6.53119160109269            | -0.54687127551248 | H  | -2.89840296245866 | 0.76255373299127  | 1.11807798338276  |
| O           | 4.52657266416395      | 3.00199431063541            | -0.37612228383665 | C  | -2.90684551235549 | -1.26344937673903 | 0.41747908249667  |
| C           | 4.44713350984832      | 5.96063432659664            | -1.26944930444013 | H  | -2.94597262417483 | -1.01785033402667 | -0.65444831550822 |
| H           | 4.09511926716447      | 6.81377961654390            | -1.86615148694874 | H  | -3.93587943152300 | -1.46796342118423 | 0.75168195511450  |
| H           | 4.88584017932483      | 6.34186630729811            | -0.33469504077835 | H  | -2.32767155835108 | -2.19603398613027 | 0.52583714002584  |
| H           | 5.23248354249337      | 5.43715325213026            | -1.83447662092759 | C  | -2.27484513181232 | -0.51874835799779 | 2.72107584847204  |
| C           | 2.72110407389387      | 4.36497086831980            | -2.27281782864021 | H  | -1.56819461621580 | -1.34314352588846 | 2.91614405308080  |
| H           | 3.37239883195682      | 3.50518700424825            | -2.49510724388145 | H  | -3.27463311087679 | -0.85553317194707 | 3.03631405670451  |
| H           | 1.72219027800501      | 3.96720146808826            | -2.04846736620009 | H  | -1.99359239423824 | 0.32535044496668  | 3.36788964559472  |
| C           | 2.64753435215561      | 5.24275547040898            | -3.49258896801438 | C  | 2.43480367163397  | 0.78562611044367  | 1.75638833477638  |
| C           | 1.54556822113715      | 6.07526225295970            | -3.72745281136670 | C  | 4.90985376101244  | 0.53341388480168  | 1.89549252588687  |
| C           | 3.68030498291316      | 5.22629519826315            | -4.43901592967063 | O  | 2.20096452717499  | 0.09489324976339  | 2.74911073692059  |
| C           | 1.48318659448261      | 6.87459813734408            | -4.86803980598538 | H  | -0.03255086434207 | 0.85929959147037  | 2.63835616068271  |
| H           | 0.73338175499010      | 6.09975161289873            | -2.99787672041328 | H  | -0.16210450115725 | 2.50715667240932  | -1.81636632482416 |
| C           | 3.62337325681065      | 6.02599696064607            | -5.58044144881098 | N  | 3.66686651621087  | 1.00485552491453  | 1.26610993738027  |
| H           | 4.54089384780019      | 4.56966733226654            | -4.28046683935907 | H  | 3.78577891727488  | 1.69009115262101  | 0.51437008049038  |
| C           | 2.52313633096597      | 6.85490078130500            | -5.79876080149007 | C  | 5.05569078856042  | 1.13853530335630  | 3.29521474962028  |
| H           | 0.61312338733767      | 7.51559726087742            | -5.03403069666208 | C  | 4.92417099967405  | -0.99532629406902 | 1.96301588502100  |
| H           | 4.44022712349182      | 5.99557848647997            | -6.30654737438518 | C  | 6.06148433856620  | 1.01147261937476  | 1.01317592355333  |
| H           | 2.47267891537610      | 7.47941938864744            | -6.69452568364837 | H  | 7.01844115485550  | 0.67625470680796  | 1.43852190986663  |
| N           | -0.52704225567843     | 6.65684521577375            | 1.53132798125310  | H  | 5.97350638053656  | 0.60275050623220  | -0.00545723291306 |
| H           | -1.08902452929148     | 7.48353979509887            | 1.69184916918062  | H  | 6.07587346253665  | 2.10887826525798  | 0.94066665593783  |
| H           | 0.11646164652139      | 6.71945429352492            | 0.74033623341054  | H  | 5.87482634890914  | -1.34128695312237 | 2.39644471826375  |
| <b>TS12</b> | <b>-242.03 cm**-1</b> | <b>***imaginary mode***</b> |                   | H  | 4.09737295159613  | -1.36740648592888 | 2.58148037361132  |
| H           | -0.27971387228192     | -0.73988356313909           | 0.73025190611919  | H  | 4.82877691613522  | -1.42388332227821 | 0.95318870118977  |
| C           | -0.78244410820167     | 3.06876530597896            | 0.19326053599930  | H  | 5.99148266383314  | 0.79385791669774  | 3.76082714183291  |
| C           | -0.15196216218918     | 2.10232055964834            | -0.79652561115291 | H  | 5.08538093502145  | 2.23765792018854  | 3.23812548806144  |
| C           | 1.25198187763337      | 1.93736710310145            | -0.26471861450278 | H  | 4.21531244323057  | 0.84233784891776  | 3.93706163115071  |
| H           | 2.11715845084492      | 1.93730222052846            | -0.93257466618546 | Rh | 1.18429017935984  | 3.54508545250665  | 1.23694746109641  |
|             |                       |                             |                   | C  | 0.77126243847055  | 4.93498144139498  | 2.72669406678139  |



|             |                                                       |                   |                   |   |                   |                   |                   |
|-------------|-------------------------------------------------------|-------------------|-------------------|---|-------------------|-------------------|-------------------|
| C           | 1.33476667729830                                      | 4.29946540731702  | 3.84004847881184  | C | -0.89662879528984 | 2.14698839188207  | 0.41809659204831  |
| C           | 0.77055366847670                                      | 4.42464506988708  | 5.11181810479961  | C | 0.12261196965363  | 2.22526138088102  | -0.69780207139782 |
| C           | -0.33063998830487                                     | 5.26516676703788  | 5.27254048104444  | H | -0.19991257074360 | 2.31345808739498  | -1.73929991366158 |
| C           | -0.84215228523862                                     | 5.97306931069721  | 4.18888177373868  | C | 1.37071235288027  | 1.71602300798548  | -0.32398762844118 |
| C           | -0.29574378513357                                     | 5.84907171483595  | 2.89597409376376  | C | 1.42168234691603  | 1.29419346669572  | 1.12818654394844  |
| H           | 2.22737453206867                                      | 3.67647587143749  | 3.71603123048769  | C | 0.99379080173608  | 2.53610130189414  | 1.86831358133205  |
| H           | 1.20473793967352                                      | 3.89238547737643  | 5.96100995272339  | H | 1.49997447762821  | 2.87564329426495  | 2.77591868220529  |
| H           | -0.78414748154247                                     | 5.39589553987606  | 6.25872620825202  | C | -1.00062218121150 | 0.68266382540169  | 0.90791018902453  |
| H           | -1.68906880178869                                     | 6.65170559247080  | 4.32857632007568  | H | -1.42799495517924 | 0.06558852278230  | 0.10339382533502  |
| C           | 2.86000173159852                                      | 5.18227627604168  | -0.99052427451076 | H | -1.71519233588721 | 0.65698325643370  | 1.74578828624201  |
| C           | 1.92750006634590                                      | 5.86102342893194  | -0.00053476913514 | C | 0.38303138734068  | 0.15898263463045  | 1.35245243514082  |
| C           | 3.47091543792457                                      | 4.06993096680783  | -0.14530240286364 | C | -1.14515296791920 | 3.83557275462360  | 2.38520856024277  |
| C           | 2.29326789088218                                      | 5.44203650264643  | 1.39062257880274  | H | -1.84828007390925 | 3.17961989691016  | 2.92789952198834  |
| C           | 3.17173923672714                                      | 4.30452412487611  | 1.26171959445565  | H | -1.74753015014475 | 4.53561416889864  | 1.78896886471369  |
| H           | 2.42571799792718                                      | 6.24724605187703  | 2.11480212675864  | H | -0.5625540108732  | 4.40270218118030  | 3.12278988292395  |
| H           | 3.83542042917669                                      | 3.94235562900661  | 2.04897798225001  | C | 0.37501051318072  | -0.36982309913255 | 2.79599917128352  |
| O           | 1.08667909947419                                      | 6.68682822255609  | -0.31457755659959 | H | -0.04428805485084 | 0.43101420044384  | 3.43500102548440  |
| O           | 4.15402615051808                                      | 3.16604064515588  | -0.62194635590193 | C | -0.53198206568164 | -1.59176632020924 | 2.91422191281241  |
| C           | 2.15981318849358                                      | 4.71541804517008  | -2.25296374454659 | H | -1.55785168764597 | -1.38283551121621 | 2.57524703619433  |
| H           | 2.84883414038221                                      | 4.10952047523881  | -2.85899313707195 | H | -0.58933063408333 | -1.94176578416592 | 3.95674494821721  |
| H           | 1.27455260034430                                      | 4.11175290008803  | -2.01532119716681 | H | -0.14059807456872 | -2.42225410258366 | 2.30255916879347  |
| H           | 1.83483131062076                                      | 5.57988642628772  | -2.84945118316744 | C | 1.77190411505079  | -0.70183547181347 | 3.31036970937651  |
| C           | 3.99909505633973                                      | 6.17384170348423  | -1.38010938010771 | H | 2.27903167521005  | -1.41351557884602 | 2.63688837058902  |
| H           | 4.61661982701183                                      | 5.65589432238544  | -2.13003412698913 | H | 1.71733467380877  | -1.16665617835497 | 4.30706840245601  |
| H           | 3.52266679766083                                      | 7.03330560598483  | -1.87739789913601 | H | 2.40981213448391  | 0.18994292957802  | 3.39809324692497  |
| C           | 4.86189567163380                                      | 6.63696950218532  | -0.24002814285328 | C | 2.35628612849356  | 1.04186204835710  | -1.23763359831599 |
| C           | 4.51344054943824                                      | 7.76164510277038  | 0.51856597097228  | C | 2.98873786745428  | 0.58590952562012  | -3.61628937619936 |
| C           | 6.01323260532957                                      | 5.92183017844285  | 0.11494194010896  | O | 3.16416828419545  | 0.24611359625008  | -0.75712343560904 |
| C           | 5.28703020056823                                      | 8.15338773571777  | 1.61132060595846  | H | 2.43482690347802  | 0.96886601417809  | 1.38106993251646  |
| H           | 3.62418573681482                                      | 8.33893913780607  | 0.24841601546479  | H | -1.87378364999873 | 2.54300985759933  | 0.11260491247771  |
| C           | 6.78796563859212                                      | 6.30967158283527  | 1.20682517890196  | N | 2.23637528503368  | 1.27267249024083  | -2.55492444171328 |
| H           | 6.30110057469174                                      | 5.04542310928670  | -0.47184908738359 | H | 1.66375896338459  | 2.05547841018802  | -2.84688487402252 |
| C           | 6.42466546104213                                      | 7.42564359257155  | 1.96174166204567  | C | 4.48669885008256  | 0.87909987462811  | -3.49840349904130 |
| H           | 5.00159720556289                                      | 9.03556087865007  | 2.19029637351991  | C | 2.72765979689713  | -0.92094617781821 | -3.54176533741843 |
| H           | 7.68317881067915                                      | 5.73883394268951  | 1.46728870708134  | C | 2.45619463549185  | 1.12851043934571  | -4.9405332342962  |
| H           | 7.03193218246086                                      | 7.73260271112515  | 2.81709719868518  | H | 2.98416191787152  | 0.65346260604297  | -5.77997071558445 |
| N           | -0.81545622435365                                     | 6.55859775838961  | 1.84776055806363  | H | 1.38075671919498  | 0.91451437506798  | -5.04605457860564 |
| H           | -1.39764681708084                                     | 7.35106103247258  | 2.09007581240274  | H | 2.60696675344677  | 2.21606220172450  | -4.99971532652301 |
| H           | -0.20749756977589                                     | 6.70987126214232  | 1.04102447872313  | H | 3.26001947157290  | -1.43259529095432 | -4.35789123271392 |
|             |                                                       |                   |                   | H | 3.07394265070993  | -1.33259082264289 | -2.58474832417819 |
|             |                                                       |                   |                   | H | 1.65183476782784  | -1.13103855095109 | -3.64655635786493 |
| <b>TS13</b> | <b>-304.83 cm**<sup>-1</sup> ***imaginary mode***</b> |                   |                   | H | 5.03457487311077  | 0.36812632519060  | -4.30485741682032 |
| H           | 0.69296366968850                                      | -0.67276568015329 | 0.69522058729711  | H | 4.66285805940509  | 1.96090760754362  | -3.57764225748219 |
| C           | -0.27586373154938                                     | 2.98145431174581  | 1.52633771567999  |   |                   |                   |                   |

|    |                   |                  |                   |             |                                            |                   |                   |
|----|-------------------|------------------|-------------------|-------------|--------------------------------------------|-------------------|-------------------|
| H  | 4.87439448271132  | 0.52510222852951 | -2.53339194533191 | <b>TS14</b> | <b>-307.26 cm**-1 ***imaginary mode***</b> |                   |                   |
| Rh | 1.21759952707474  | 3.86534508080303 | 0.13188011960314  | H           | 2.77174363631844                           | 2.88688228812792  | 3.59966399980667  |
| C  | 1.29104191758876  | 5.63398892476963 | 1.30703028015825  | C           | 0.55554071683470                           | 1.09197863901139  | 0.98077209016460  |
| C  | 2.16615474827690  | 5.61406622708100 | 2.40024878507027  | C           | 1.82012816568753                           | 0.50952632229925  | 1.59130618656812  |
| C  | 1.92159780043549  | 6.36508861737371 | 3.54729239575428  | C           | 2.93066854328298                           | 1.17555794296351  | 0.80746590462507  |
| C  | 0.79181251030231  | 7.18527260960084 | 3.59729704866975  | H           | 3.81980525009432                           | 0.60894816968605  | 0.51525581553757  |
| C  | -0.07989676210326 | 7.24094588779611 | 2.51511626608163  | C           | 2.90909193353872                           | 2.57088629835271  | 0.92322864189402  |
| C  | 0.14944996365825  | 6.47401568427745 | 1.36243439408587  | C           | 1.73332027437880                           | 3.07347234570048  | 1.73270087694187  |
| H  | 3.05734792068575  | 4.98450780322724 | 2.35730013805506  | C           | 0.54405784172973                           | 2.47921608078260  | 1.02286184714721  |
| H  | 2.61468135033416  | 6.31705164712890 | 4.39044539256614  | H           | -0.36393964969810                          | 3.05601466143443  | 0.82713780059052  |
| H  | 0.58843569314295  | 7.79101840023997 | 4.48424957722960  | C           | 1.90394342382363                           | 0.95862620649945  | 3.06950065540561  |
| H  | -0.96345698112003 | 7.88523532646800 | 2.54947683787046  | H           | 2.83295870448563                           | 0.56664209408749  | 3.50998549334776  |
| C  | 4.20410182600058  | 4.76973731774316 | -1.25281147437286 | H           | 1.06915493555203                           | 0.49045727085817  | 3.61467999865854  |
| C  | 3.02182258933278  | 4.45493941078283 | -2.17322343129276 | C           | 1.82968796262786                           | 2.49834313792365  | 3.17338190293679  |
| C  | 3.60037883554426  | 5.80276322516009 | -0.31002802943670 | C           | -0.65185164717189                          | 0.23346719889619  | 0.81376725725431  |
| C  | 1.78740401718504  | 4.95152851214078 | -1.58353454076511 | H           | -0.97033750532815                          | -0.11533332610926 | 1.81182028802153  |
| C  | 2.09152246347991  | 5.83438466724285 | -0.47124131499495 | H           | -0.44127795393978                          | -0.65910771063475 | 0.20863089359558  |
| H  | 0.92217164779527  | 5.09852501315660 | -2.23844671420672 | H           | -1.48466808200046                          | 0.78541983547847  | 0.35929699837467  |
| H  | 1.65519866170370  | 6.83806034007511 | -0.47645648473534 | C           | 0.68081562698929                           | 2.96701245571528  | 4.08158963731436  |
| O  | 3.14284895717406  | 3.92662935818279 | -3.26622396451053 | H           | -0.24083421601043                          | 2.46943994244786  | 3.72315648021605  |
| O  | 4.23046136754755  | 6.55769942801060 | 0.39037843292954  | C           | 0.92309008850658                           | 2.52704865752335  | 5.52270795527470  |
| C  | 5.35753844576478  | 5.36841923302378 | -2.04724200454701 | H           | 1.07167944259668                           | 1.43981431487609  | 5.60589255127085  |
| H  | 5.77225051366574  | 4.61831544008677 | -2.73578818593171 | H           | 0.07264186279801                           | 2.79859276360274  | 6.16736931905410  |
| H  | 5.01897269614430  | 6.23065484047508 | -2.64125156487876 | H           | 1.82274857392085                           | 3.01895888789316  | 5.92965628902177  |
| H  | 6.15481213357429  | 5.70520308289863 | -1.37084940043003 | C           | 0.45663633762440                           | 4.47443576348078  | 4.02330839156716  |
| C  | 4.60894736486373  | 3.46778475647392 | -0.50729183545041 | H           | 1.38642843881276                           | 5.01927989787318  | 4.25964564846382  |
| H  | 3.79819475756796  | 3.20352632249512 | 0.19474149593390  | H           | -0.30462945357782                          | 4.78112332711508  | 4.75743234873747  |
| H  | 4.64605593341995  | 2.67240479275401 | -1.26496083178974 | H           | 0.11317965570841                           | 4.81035946190804  | 3.0338660078808   |
| C  | 5.92574931254290  | 3.51939456234609 | 0.21156436018935  | C           | 4.09231591644599                           | 3.49774650243413  | 0.85601051220380  |
| C  | 7.09051078215742  | 3.07136692672137 | -0.42574475265510 | C           | 6.54234826030473                           | 3.67974718772575  | 0.37548603787791  |
| C  | 6.02956537043535  | 4.01018145138797 | 1.51895615452751  | O           | 3.98876219027047                           | 4.63438043278230  | 1.31949124945904  |
| C  | 8.32617764651457  | 3.12311910479331 | 0.21772645804260  | H           | 1.73152832663090                           | 4.16689493042924  | 1.73275539014642  |
| H  | 7.02282124668848  | 2.67111499735445 | -1.44148826094515 | H           | 1.84810253653688                           | -0.58392903374428 | 1.49754381614535  |
| C  | 7.26309177016187  | 4.06383580256868 | 2.16653709007313  | N           | 5.24219006668725                           | 2.99280165781669  | 0.38223505273905  |
| H  | 5.13172011556240  | 4.35337715177261 | 2.03726853092260  | H           | 5.19697585637079                           | 2.11444316274841  | -0.11950589081726 |
| C  | 8.41700044622770  | 3.62345665175177 | 1.51694943008957  | C           | 6.48392841717482                           | 4.96293110925748  | -0.45761278124105 |
| H  | 9.22224416102179  | 2.76616503711098 | -0.29690382589691 | C           | 6.96145498356584                           | 3.99248764324640  | 1.81464411294139  |
| H  | 7.32271716134135  | 4.44882940279160 | 3.18788222201430  | C           | 7.53932887047718                           | 2.70413434098534  | -0.24641839308537 |
| H  | 9.38396637324104  | 3.66376514585132 | 2.02496258951981  | H           | 8.54120953896994                           | 3.15624144903533  | -0.27364704562561 |
| N  | -0.67390422684722 | 6.59805633844635 | 0.26334430799118  | H           | 7.59759999019352                           | 1.77546479578693  | 0.34330653915457  |
| H  | -0.76381925489942 | 5.77726786594074 | -0.32669400305304 | H           | 7.23987218391619                           | 2.45150008881063  | -1.27399727778693 |
| H  | -1.55828941137767 | 7.06849756640298 | 0.41675748162127  | H           | 7.95095127161342                           | 4.47430478048543  | 1.81994168269621  |
|    |                   |                  |                   | H           | 6.24050528526265                           | 4.66880437634682  | 2.29330970178481  |

|    |                   |                   |                   |             |                                            |                   |                   |
|----|-------------------|-------------------|-------------------|-------------|--------------------------------------------|-------------------|-------------------|
| H  | 7.02425969374091  | 3.06715853348412  | 2.40816941798637  | H           | 0.98911372375203                           | -0.62493758800714 | -1.85579394053214 |
| H  | 7.47660241950246  | 5.43802459613302  | -0.48128419802119 | H           | -0.35167557847115                          | -1.48879349294331 | -2.41843804597671 |
| H  | 6.17313273208443  | 4.72612498675517  | -1.48442768503412 |             |                                            |                   |                   |
| H  | 5.76549799602357  | 5.67170059262631  | -0.02465598218298 | <b>TS15</b> | <b>-316.60 cm**-1 ***imaginary mode***</b> |                   |                   |
| Rh | 1.68582001329875  | 1.89597036081719  | -0.76577907239547 | H           | -0.14175786097764                          | -0.76361643620343 | 0.88520551299734  |
| C  | -0.03319948437750 | 1.78181798032490  | -2.01238162374132 | C           | -0.68001179162374                          | 3.03175038344021  | 0.33502008087381  |
| C  | -0.83378773082192 | 2.93272933647624  | -2.00843911262765 | C           | -0.07080525057104                          | 2.06673325130888  | -0.66846985731358 |
| C  | -2.20950796810061 | 2.86573438966917  | -2.21116032934560 | C           | 1.34708831403242                           | 1.90435567357715  | -0.16995003823323 |
| C  | -2.80256511904529 | 1.62560685664159  | -2.46286821211590 | H           | 2.19060730709737                           | 1.89617563158916  | -0.86643759000176 |
| C  | -2.02485562252509 | 0.47372836623452  | -2.50491527052575 | C           | 1.41700999435279                           | 1.39353073116866  | 1.13126527002563  |
| C  | -0.63955646934118 | 0.52939477644263  | -2.28287095034242 | C           | 0.04487356713432                           | 1.18673621411381  | 1.74367855132062  |
| H  | -0.36958768833380 | 3.90668167904715  | -1.83155443066458 | C           | -0.59292114367406                          | 2.55812011790413  | 1.63581259016366  |
| H  | -2.81152896850245 | 3.77703482262198  | -2.18509548945473 | H           | -1.16374044719735                          | 3.00232838140024  | 2.45608933739399  |
| H  | -3.87964642809357 | 1.55469821011669  | -2.63557530561018 | C           | -0.81660433528691                          | 0.71657853758244  | -0.56364634260952 |
| H  | -2.48534761923463 | -0.49714832845373 | -2.70952564450694 | H           | -0.38587795450093                          | 0.01039946527314  | -1.28910966143878 |
| C  | 2.98777630939902  | 3.94768272566788  | -3.20786733398659 | H           | -1.86401810207093                          | 0.88300042502307  | -0.86216933724669 |
| C  | 3.81445602122544  | 2.79382859764008  | -2.63835738996524 | C           | -0.74039595508267                          | 0.16488755734078  | 0.87725153396525  |
| C  | 1.70293215436435  | 3.24104297620692  | -3.62534285928540 | C           | -1.55887831818333                          | 4.14025136708727  | -0.13079771955443 |
| C  | 2.95733379319495  | 1.63583401689493  | -2.42058018412323 | H           | -2.42596628840815                          | 3.71216785636864  | -0.66354448296721 |
| C  | 1.65119906223360  | 1.85497168132417  | -3.01559161627795 | H           | -1.03424472864919                          | 4.79477496553053  | -0.84344124413597 |
| H  | 3.42533259052790  | 0.64828218353567  | -2.35007986110191 | H           | -1.92771401225584                          | 4.74741981651871  | 0.70584156893947  |
| H  | 1.24318479495272  | 1.07739660996842  | -3.67013498474120 | C           | -2.12430745792942                          | -0.17395545936127 | 1.45433617932713  |
| O  | 5.02083225531282  | 2.84212847811166  | -2.46431372393908 | H           | -2.75358925607181                          | 0.73028172632104  | 1.34597493931152  |
| O  | 0.87876166736057  | 3.69226807497363  | -4.38276522450468 | C           | -2.77626731066804                          | -1.30028551924027 | 0.65692234309593  |
| C  | 2.67608579634740  | 4.98884034237592  | -2.12672026059866 | H           | -2.85301787283264                          | -1.06065323805215 | -0.41427756353017 |
| H  | 2.04509823474039  | 5.78742611529908  | -2.54544982435740 | H           | -3.79211836927822                          | -1.50876519452856 | 1.02704748303027  |
| H  | 2.14567769736460  | 4.53365160506201  | -1.27318593550448 | H           | -2.18839918099540                          | -2.22904408690225 | 0.75055846012847  |
| H  | 3.61106297054576  | 5.43232719151483  | -1.75419939220562 | C           | -2.07267055441059                          | -0.54091664604404 | 2.93411215828964  |
| C  | 3.68830343598050  | 4.62913684445504  | -4.39727615636788 | H           | -1.35536649412674                          | -1.36057317984385 | 3.10977362461148  |
| H  | 2.98171928826556  | 5.36683736687852  | -4.80869167397541 | H           | -3.05960691673644                          | -0.88160405107693 | 3.28370607164891  |
| H  | 4.54491197290805  | 5.18807436376782  | -3.99184556095158 | H           | -1.77511325531465                          | 0.30740325739754  | 3.56794652381224  |
| C  | 4.16406369132261  | 3.70604519692643  | -5.48910284521795 | C           | 2.57678743081112                           | 0.66987048662922  | 1.76066486280551  |
| C  | 5.48796209420255  | 3.24604893880046  | -5.50691265904714 | C           | 5.00537593543989                           | 0.10942386344279  | 1.58686407434000  |
| C  | 3.30317055357643  | 3.28756076491952  | -6.51333686469647 | O           | 2.37921261301567                           | 0.00450651596482  | 2.77863726789418  |
| C  | 5.93737405520827  | 2.38748361133530  | -6.50886258903858 | H           | 0.15174340304516                           | 0.84637178353295  | 2.77732916570896  |
| H  | 6.17179607961202  | 3.56635634847022  | -4.71770870944864 | H           | -0.10206871772412                          | 2.47076855960729  | -1.68865964375996 |
| C  | 3.74867915884786  | 2.42601229573271  | -7.51603803086439 | N           | 3.76600480650843                           | 0.76203678519593  | 1.13950988076526  |
| H  | 2.27191785988753  | 3.64809043695558  | -6.52610182811591 | H           | 3.88672920452123                           | 1.48498711261903  | 0.42365486531008  |
| C  | 5.06721222781960  | 1.97082803794834  | -7.51677931843947 | C           | 5.44214604470358                           | 0.66683989868169  | 2.94487737470884  |
| H  | 6.97563529858906  | 2.04458484758163  | -6.50394492399743 | C           | 4.80917944798894                           | -1.40642576493854 | 1.66200651891427  |
| H  | 3.06177603155548  | 2.11484296037798  | -8.30755991161456 | C           | 6.06756684828177                           | 0.42638562732033  | 0.53502589207746  |
| H  | 5.41827986415614  | 1.29947736515702  | -8.30483261939372 | H           | 7.02479619980506                           | -0.03432230550177 | 0.81901346091442  |
| N  | 0.13779133693836  | -0.60153229780833 | -2.40778210231921 | H           | 5.77298006974315                           | 0.03107241978259  | -0.44980829077537 |

|    |                   |                   |                   |              |                                             |                   |                   |
|----|-------------------|-------------------|-------------------|--------------|---------------------------------------------|-------------------|-------------------|
| H  | 6.21645483061817  | 1.51188565684011  | 0.43797350560816  | H            | 3.28779154533511                            | 8.08577917663546  | -5.24211323809357 |
| H  | 5.75666474853098  | -1.89078766392143 | 1.94317866679673  | H            | 1.33839309754575                            | 9.53087838304379  | -4.66607864398493 |
| H  | 4.04472099474625  | -1.66797948410171 | 2.40448293051888  | N            | 1.39885282774612                            | 4.09485675026185  | 4.36039301996823  |
| H  | 4.49737023120263  | -1.80090988975108 | 0.68238880904381  | H            | 1.66813935937885                            | 3.29119248109043  | 3.80035120755803  |
| H  | 6.37536575337479  | 0.18337391591101  | 3.27224563362033  | H            | 1.12132131472407                            | 3.84242294527540  | 5.30229711984691  |
| H  | 5.62284635700879  | 1.75089372593778  | 2.87627648850177  |              |                                             |                   |                   |
| H  | 4.66998150743881  | 0.48584840316772  | 3.70502459284992  | <b>TS15'</b> | <b>-314.28 cm** -1 ***imaginary mode***</b> |                   |                   |
| Rh | 1.32585984716164  | 3.52139945638107  | 1.25180331614369  | H            | -0.06399479243601                           | -0.81426325478058 | 0.90232879719447  |
| C  | 0.76381575655533  | 5.27396384443286  | 2.33299839344126  | C            | -0.65622235374523                           | 2.97014049002594  | 0.32578493346226  |
| C  | 0.02089934707934  | 6.29841538810263  | 1.73932303231200  | C            | -0.03554628889985                           | 2.00534319844071  | -0.67078958470328 |
| C  | -0.87743023572570 | 7.07168536851059  | 2.47232430722572  | C            | 1.38313124485569                            | 1.86655146003506  | -0.16923415309154 |
| C  | -1.02582125080845 | 6.82955238495319  | 3.83859223675812  | H            | 2.22939727823917                            | 1.84944739619671  | -0.86121649671769 |
| C  | -0.29080032765115 | 5.82170088558232  | 4.45648667805623  | C            | 1.46035281082258                            | 1.36546758022214  | 1.13477557606814  |
| C  | 0.61541578550767  | 5.03700420359476  | 3.72701231360295  | C            | 0.09200189752703                            | 1.14396189943196  | 1.74904375644554  |
| H  | 0.14434725471525  | 6.50041064201884  | 0.67502513313064  | C            | -0.56320096983838                           | 2.50649644651088  | 1.62997823613410  |
| H  | -1.45047159758417 | 7.85985896352593  | 1.97853435416923  | H            | -1.14096984485698                           | 2.94873995311600  | 2.44645337690113  |
| H  | -1.71926785315859 | 7.43006484398352  | 4.43322741979476  | C            | -0.76137769093204                           | 0.64550262698317  | -0.55649345767051 |
| H  | -0.40743141813882 | 5.62957667056342  | 5.52714725660119  | H            | -0.32030375568891                           | -0.05949530534007 | -1.27690823911259 |
| C  | 3.41637159584910  | 5.35102655673898  | -0.54510381025225 | H            | -1.81108971686290                           | 0.79443826934996  | -0.85619781222643 |
| C  | 2.81701614556516  | 6.14397613199792  | 0.61074640816661  | C            | -0.67728342649496                           | 0.10460823155027  | 0.88838006919550  |
| C  | 3.74746195528361  | 4.01023836034353  | 0.10661430840222  | C            | -1.54641554420715                           | 4.06619623031377  | -0.14774117705970 |
| C  | 2.65973920638084  | 5.25651340537774  | 1.82806850239789  | H            | -2.40750175029187                           | 3.62761788454870  | -0.68171465394082 |
| C  | 3.33584807619641  | 4.01576067561524  | 1.50166508336317  | H            | -1.02458845608200                           | 4.72312875511006  | -0.86051095562472 |
| H  | 2.87114538797264  | 5.74478995453726  | 2.78364208710136  | H            | -1.92310093943056                           | 4.67413696750967  | 0.68484731892795  |
| H  | 3.82566432740222  | 3.37284275540788  | 2.23733043072010  | C            | -2.05605454851592                           | -0.25325725281201 | 1.46607525802654  |
| O  | 2.59835646345117  | 7.33132594254749  | 0.59351829875572  | H            | -2.69881533741089                           | 0.64124868854652  | 1.35562227911039  |
| O  | 4.31480811580535  | 3.10255770103960  | -0.49827391344727 | C            | -2.69142177933914                           | -1.39129108359562 | 0.67172384248925  |
| C  | 4.72086140254476  | 6.01259391477958  | -0.99251334559493 | H            | -2.77287302681736                           | -1.15548830461679 | -0.39996214500497 |
| H  | 4.52573335874885  | 7.02818129606972  | -1.36305341672388 | H            | -3.70367522534454                           | -1.61430779265586 | 1.04323043635887  |
| H  | 5.43283878697365  | 6.08005286270999  | -0.15562705274154 | H            | -2.08948289352497                           | -2.31083559977057 | 0.76694442655862  |
| H  | 5.18397878061408  | 5.41952296306049  | -1.79432574488375 | C            | -1.99875422175875                           | -0.61590376611348 | 2.94665325049639  |
| C  | 2.43215308524613  | 5.12835307886942  | -1.71762256740578 | H            | -1.27067073721841                           | -1.42572103948707 | 3.12380423074941  |
| H  | 2.89218420497351  | 4.35553195127830  | -2.35380479056632 | H            | -2.98088914196407                           | -0.96879649246733 | 3.29767466708371  |
| H  | 1.50317590495328  | 4.69789842003524  | -1.30693380976719 | H            | -1.71191829747940                           | 0.23771734387886  | 3.57829986234788  |
| C  | 2.11789914453246  | 6.34295004151836  | -2.54309023787847 | C            | 2.63308758638602                            | 0.64813397764968  | 1.74421771834675  |
| C  | 1.01882137573638  | 7.15595934749020  | -2.24126571850410 | C            | 5.05982669839553                            | 0.09194574226892  | 1.50960173153075  |
| C  | 2.92205557720104  | 6.69320032812529  | -3.63621281740333 | O            | 2.45747665289105                            | -0.02767869505656 | 2.75892609821427  |
| C  | 0.73836298559772  | 8.29393102043940  | -2.99601698831291 | H            | 0.20160811202583                            | 0.81259612557789  | 2.78556751780606  |
| H  | 0.36850465543807  | 6.88849049041772  | -1.40519246400696 | H            | -0.07278455311901                           | 2.40172004489256  | -1.69393744073669 |
| C  | 2.64744835489543  | 7.83144715563789  | -4.39331000293456 | N            | 3.81144506373672                            | 0.75348574377308  | 1.10244337613661  |
| H  | 3.77319669805315  | 6.05952988392139  | -3.90044465329800 | H            | 3.91664875509411                            | 1.48693136970965  | 0.39592161294889  |
| C  | 1.55595194514417  | 8.63916560629746  | -4.07254814502570 | C            | 5.53262959909781                            | 0.62970553183062  | 2.86335533513479  |
| H  | -0.12607247207307 | 8.91348107367624  | -2.74347871443789 | C            | 4.86096597283277                            | -1.42424137416230 | 1.56984565274411  |

|    |                   |                   |                   |              |                     |                                |                   |
|----|-------------------|-------------------|-------------------|--------------|---------------------|--------------------------------|-------------------|
| C  | 6.09516428530045  | 0.42029440625056  | 0.43473945598933  | H            | 2.18432276229845    | 3.00514919669671               | -2.60890196035721 |
| H  | 7.05832818567832  | -0.04597097487989 | 0.68793192092318  | C            | 3.88142301849328    | 4.02325341422549               | -5.37753121748600 |
| H  | 5.77415570324836  | 0.03810176920474  | -0.54704565483239 | H            | 4.65064436734555    | 6.01879751775472               | -5.68997451926823 |
| H  | 6.24417000005862  | 1.50672890273058  | 0.34794212518815  | H            | 2.98277269788639    | 2.14739084392587               | -4.78953808213152 |
| H  | 5.81277812213373  | -1.91423442710295 | 1.82539310373409  | H            | 4.23404334383784    | 3.64743466773333               | -6.34152262352435 |
| H  | 4.11144372126685  | -1.69326182892237 | 2.32486009394937  | N            | 1.17045288666847    | 4.17709870622117               | 4.34590090652837  |
| H  | 4.52818095273978  | -1.80595836000435 | 0.59206402305943  | H            | 1.47293305170694    | 3.35083894328455               | 3.83776910031753  |
| H  | 6.47289795508579  | 0.13981187564186  | 3.15955158331213  | H            | 0.80662337213494    | 3.96556243980381               | 5.26800535948717  |
| H  | 5.71357040107673  | 1.71429169736511  | 2.80493221491334  |              |                     |                                |                   |
| H  | 4.78004531577767  | 0.43933646886523  | 3.64071179209786  | <b>TS15"</b> | <b>-315.07 cm**</b> | <b>-1 ***imaginary mode***</b> |                   |
| Rh | 1.34238272337852  | 3.49400936462172  | 1.23118146854230  | H            | 1.82621924925504    | -1.71424685730889              | 0.76672147757647  |
| C  | 0.75651981312656  | 5.28873311247955  | 2.23098036814057  | C            | -0.13842172002419   | 1.58971088587308               | 0.28573908588328  |
| C  | 0.10310166420816  | 6.30985174545895  | 1.53226296943140  | C            | 0.75862811751162    | 0.93487573229874               | -0.75149687650553 |
| C  | -0.83514456925961 | 7.13411869783100  | 2.14959935918595  | C            | 2.14848938365564    | 1.32965864290999               | -0.30587263433012 |
| C  | -1.11346816545961 | 6.95195722613350  | 3.50540596291990  | H            | 2.90465365587636    | 1.63890643152203               | -1.03322688619921 |
| C  | -0.46758514253181 | 5.95237679496132  | 4.22722030815903  | C            | 2.45774685548037    | 0.87619360743717               | 0.98257114658566  |
| C  | 0.47514872148897  | 5.11382441223482  | 3.61300186539642  | C            | 1.29140456888736    | 0.16399377559911               | 1.63966498176873  |
| H  | 0.32505882007292  | 6.46345578181257  | 0.47391316542584  | C            | 0.17721732714069    | 1.18806868765986               | 1.57416910166571  |
| H  | -1.33767724876436 | 7.91641657811200  | 1.57621067037278  | H            | -0.48986187363704   | 1.37500728535041               | 2.42060224883120  |
| H  | -1.83891283811846 | 7.59527546321100  | 4.01036191267360  | C            | 0.59630571974780    | -0.59892666056068              | -0.6438507553456  |
| H  | -0.68501479746006 | 5.80931737312119  | 5.28976396656549  | H            | 1.24541055780653    | -1.08171887052355              | -1.38981630653943 |
| C  | 3.54385130870469  | 5.45103254039080  | -0.41270965430968 | H            | -0.44207479360829   | -0.85014152094887              | -0.91355401921550 |
| C  | 2.96199761730699  | 6.17278336036775  | 0.80085793997447  | C            | 0.92163760256511    | -1.08024914593227              | 0.78724792694836  |
| C  | 3.80098445620603  | 4.04735369786333  | 0.13059063755338  | C            | -1.40437649334821   | 2.25961570831116               | -0.12128659307005 |
| C  | 2.69046942051142  | 5.19089514496409  | 1.91591051027854  | H            | -2.04809028849141   | 1.52926510987157               | -0.6423965866877  |
| C  | 3.34368127258716  | 3.96130171790838  | 1.51426228265997  | H            | -1.21517707483525   | 3.08325702540299               | -0.82497153171852 |
| H  | 2.85330392963651  | 5.57392329800789  | 2.92770263544247  | H            | -1.95244771542081   | 2.65161613548962               | 0.74540706001289  |
| H  | 3.80906457132454  | 3.26192510358457  | 2.21367001593533  | C            | -0.21272900269915   | -1.91576750300480              | 1.40147593639013  |
| O  | 2.81584040178893  | 7.36769214622114  | 0.87770416214128  | H            | -1.14176652844750   | -1.32027090250327              | 1.31358084573748  |
| O  | 4.36915190384618  | 3.16393462005924  | -0.50575859608578 | C            | -0.40794883422724   | -3.21081287598018              | 0.61763075887928  |
| C  | 4.87990280949645  | 6.09461746808704  | -0.78340313102751 | H            | -0.59399097618188   | -3.02514373710209              | -0.45095456390848 |
| H  | 4.72416873651849  | 7.13965188198180  | -1.08812943309482 | H            | -1.26076883280805   | -3.78565075827954              | 1.01113791429493  |
| H  | 5.56880252524980  | 6.08345030725554  | 0.07527845211427  | H            | 0.48957729086230    | -3.84779965085132              | 0.69450471363668  |
| H  | 5.35041572178239  | 5.54545586322410  | -1.61007126353670 | C            | 0.01378921618772    | -2.22435883002142              | 2.87800100440690  |
| C  | 2.50670343359937  | 5.51024831282668  | -1.56115516308006 | H            | 0.99424579794377    | -2.70622967992689              | 3.03218923404829  |
| H  | 1.60786792373847  | 4.95727341477748  | -1.23714071646187 | H            | -0.75861648476831   | -2.91386712011784              | 3.25278066884762  |
| H  | 2.21811650979896  | 6.56876406765363  | -1.66490141984899 | H            | -0.01941661003715   | -1.32213100176224              | 3.50642649217579  |
| C  | 2.97537287479656  | 4.99010977271035  | -2.89189126006901 | C            | 3.82913584901478    | 0.60122388938399               | 1.53479110039489  |
| C  | 3.66293500770569  | 5.82640277861496  | -3.78197114966248 | C            | 6.28687098795909    | 0.92382634568680               | 1.23855236221492  |
| C  | 2.73540655614777  | 3.66657922844997  | -3.27937355455816 | O            | 3.93676822184091    | -0.13405105399404              | 2.51799036679210  |
| C  | 4.11594681681702  | 5.34892910475017  | -5.01139758917948 | H            | 1.55886493606399    | -0.11119790290667              | 2.66375031734902  |
| H  | 3.84112620155911  | 6.86996510621229  | -3.50866901830139 | H            | 0.53706847058619    | 1.29775429993362               | -1.76146835830953 |
| C  | 3.18319879781295  | 3.18458351870227  | -4.50833345012073 | N            | 4.87631459074692    | 1.13626070795454               | 0.88141265523361  |

|    |                   |                   |                   |             |                       |                             |                   |
|----|-------------------|-------------------|-------------------|-------------|-----------------------|-----------------------------|-------------------|
| H  | 4.69890338791209  | 1.88836145947582  | 0.20915946540516  | C           | -0.45856257567610     | 4.92158545188845            | -2.78191094658776 |
| C  | 6.57954585232047  | 1.50442948159158  | 2.62494798534060  | H           | 0.35738994416709      | 6.60621073416762            | -1.70677243159063 |
| C  | 6.62331457285257  | -0.56883697930677 | 1.19663310269987  | C           | 1.12744490306826      | 3.23770265542116            | -3.46037706941392 |
| C  | 7.12057000772160  | 1.65363217323494  | 0.18648723455891  | H           | 3.18163171478407      | 3.58965951491281            | -2.89293029784637 |
| H  | 8.19083919600645  | 1.52124020718160  | 0.40132701981624  | C           | -0.18305502774738     | 3.71492656958431            | -3.42522018291836 |
| H  | 6.91830391058681  | 1.25285332152729  | -0.81924696407307 | H           | -1.48134784170463     | 5.30611655857361            | -2.75016326381665 |
| H  | 6.89522526878711  | 2.73002516118676  | 0.17811720865172  | H           | 1.35412178223278      | 2.29614088720845            | -3.96741809769648 |
| H  | 7.69195074773872  | -0.71671527172300 | 1.41441498768342  | H           | -0.98809816829355     | 3.14830186555264            | -3.89991440650866 |
| H  | 6.03215892061603  | -1.12624696106360 | 1.93408257134752  | N           | 1.05114643942118      | 3.40528027597848            | 4.2555477544560   |
| H  | 6.41485871634502  | -0.97904040185857 | 0.19626422509594  | H           | 1.64168913524005      | 2.72937694978293            | 3.77893165187304  |
| H  | 7.64089801470973  | 1.36337047306048  | 2.88130821006809  | H           | 0.74354388126309      | 3.08715274441513            | 5.16751175296206  |
| H  | 6.36106871228065  | 2.58357521698078  | 2.64419713956960  |             |                       |                             |                   |
| H  | 5.96574202177804  | 1.00644523661637  | 3.38799544019925  | <b>TS16</b> | <b>-316.21 cm**-1</b> | <b>***imaginary mode***</b> |                   |
| Rh | 1.56865292444052  | 2.81485153364241  | 1.12718843542954  | H           | -0.04433385814162     | -0.81725855824097           | 0.91659848987355  |
| C  | 0.36879088088278  | 4.27837059556997  | 2.10003914374679  | C           | -0.86205210934563     | 2.94947730327419            | 0.53257977110843  |
| C  | -0.56784795102182 | 4.99552496273578  | 1.34899803346686  | C           | -0.23091683182561     | 2.06947372967245            | -0.53334122716703 |
| C  | -1.76500138289345 | 5.44039493831779  | 1.90640623017192  | C           | 1.21532679654441      | 1.99485936745610            | -0.10137879852875 |
| C  | -2.02467133947181 | 5.18664804716639  | 3.25384726587527  | H           | 2.02551345977543      | 2.07775479765904            | -0.83165970983885 |
| C  | -1.10196757033288 | 4.48729835751171  | 4.02774642176171  | C           | 1.38083539037690      | 1.44084261482787            | 1.17384067896062  |
| C  | 0.10225636287227  | 4.02857087053257  | 3.47311065652791  | C           | 0.05573014877532      | 1.11302768254301            | 1.83552992337879  |
| H  | -0.36190933003513 | 5.20179174537847  | 0.29731781220579  | C           | -0.67884036282478     | 2.43912037853820            | 1.80897267340050  |
| H  | -2.48469025166143 | 5.98657088471606  | 1.29206036457975  | H           | -1.24230253321227     | 2.81172910297456            | 2.66913224429184  |
| H  | -2.95315648128063 | 5.53743622447535  | 3.71225541798205  | C           | -0.86695992936367     | 0.66298193487078            | -0.45332402106666 |
| H  | -1.30520948217079 | 4.28806340674471  | 5.08402021614104  | H           | -0.40605632949573     | 0.01863019495449            | -1.21685908048800 |
| C  | 3.35277013987924  | 5.71548841756806  | -0.17142565910673 | H           | -1.93338236174904     | 0.75575474465601            | -0.71362748609930 |
| C  | 2.22366620872613  | 5.95019877368955  | 0.82465348396288  | C           | -0.69875171251978     | 0.07154606915357            | 0.96397973498827  |
| C  | 3.81332055433547  | 4.30341822387856  | 0.15117619975261  | C           | -1.84368728696850     | 4.00246141038325            | 0.15172724707091  |
| C  | 2.23644951242721  | 4.84878471845901  | 1.86950852090203  | H           | -2.69810186512671     | 3.52827985234179            | -0.36240680661075 |
| C  | 3.27723034032659  | 3.92472816717154  | 1.45791652397786  | H           | -1.40572561668379     | 4.72611936704092            | -0.55268779126739 |
| H  | 2.22417968295160  | 5.19726355859097  | 2.90798584514508  | H           | -2.22096111935183     | 4.54530506058250            | 1.02796288949155  |
| H  | 3.90586170744049  | 3.37226979971947  | 2.16315411571430  | C           | -2.03659625758204     | -0.37192736203367           | 1.57764909854183  |
| O  | 1.51581727587399  | 6.92679234071611  | 0.83079548907090  | H           | -2.72554794739731     | 0.49261318804209            | 1.51857906235437  |
| O  | 4.58423202183160  | 3.66134243646231  | -0.55288464748431 | C           | -2.64361791152598     | -1.51504429836504           | 0.76831462684655  |
| C  | 4.51121513239034  | 6.63958959464572  | 0.26299217013336  | H           | -2.77443346718891     | -1.25053644281398           | -0.29181078816266 |
| H  | 4.20415827884440  | 7.69001321522289  | 0.15386358135277  | H           | -3.63010250217781     | -1.80003677294496           | 1.16590147822906  |
| H  | 4.80082418693942  | 6.46589269207857  | 1.31043021792471  | H           | -1.99420734328869     | -2.40572279627381           | 0.81244783939458  |
| H  | 5.38680598358514  | 6.45295949192265  | -0.37613359641814 | C           | -1.90997678161196     | -0.77629192052973           | 3.04275690407511  |
| C  | 3.00946227116209  | 5.99957077342194  | -1.63275739995373 | H           | -1.14366742383027     | -1.56000977981288           | 3.16952261967233  |
| H  | 2.76340769866394  | 7.06975714061739  | -1.71158911531094 | H           | -2.86344339538574     | -1.18085909268097           | 3.41650485281377  |
| H  | 3.92975679381819  | 5.83837543476095  | -2.21529807095453 | H           | -1.63603294990888     | 0.06961010202381            | 3.69027800409320  |
| C  | 1.89334639166637  | 5.18297698764296  | -2.22255741023594 | C           | 2.61944758047353      | 0.78653941890052            | 1.72240813708308  |
| C  | 0.57303230920894  | 5.64924447442135  | -2.18952266592559 | C           | 5.08235087453349      | 0.46877014717832            | 1.45597370504561  |
| C  | 2.15482518359317  | 3.96262962886916  | -2.85855452637458 | O           | 2.51861767998846      | 0.05671718262399            | 2.71037763850426  |

|    |                   |                   |                   |              |                       |                             |                   |
|----|-------------------|-------------------|-------------------|--------------|-----------------------|-----------------------------|-------------------|
| H  | 0.23216570219687  | 0.74245353633247  | 2.84931922113421  | C            | 5.52130779454535      | 6.28090321289071            | 0.17102451582935  |
| H  | -0.33685652255344 | 2.50592168436050  | -1.53489767865875 | C            | 5.62947522170473      | 7.18826063737740            | 1.23370992285913  |
| N  | 3.77324873716264  | 1.01705635221420  | 1.07159410198485  | C            | 6.47263687869895      | 5.25615789974523            | 0.07276237341280  |
| H  | 3.79496622318205  | 1.75946225358513  | 0.36447702809954  | C            | 6.64800293974302      | 7.06441040818162            | 2.17907595573535  |
| C  | 5.48739077407591  | 0.96868124201646  | 2.84591701752525  | H            | 4.90817117044987      | 8.00500880775871            | 1.31958329825331  |
| C  | 5.04177573789062  | -1.06091133876258 | 1.42402501416404  | C            | 7.49165610198602      | 5.12941035730618            | 1.01568678597453  |
| C  | 6.08814425927649  | 0.97046916088131  | 0.42101761427047  | H            | 6.40385445824193      | 4.54253343606405            | -0.75179912642058 |
| H  | 7.08912453760755  | 0.57918429316644  | 0.65380840199928  | C            | 7.58046589984801      | 6.03185596030495            | 2.07611782358465  |
| H  | 5.81267328027200  | 0.63318507005453  | -0.59045203077457 | H            | 6.71630440350455      | 7.78368868920172            | 2.99947521596900  |
| H  | 6.13663216590000  | 2.06946842575172  | 0.41557509849541  | H            | 8.22216315518096      | 4.32166014872487            | 0.91917050655889  |
| H  | 6.03436696529095  | -1.46745134631310 | 1.67090843032334  | H            | 8.37941756094483      | 5.93543505436896            | 2.81589727174433  |
| H  | 4.31184577038282  | -1.44738177252549 | 2.14708346996743  | N            | 1.15531973672764      | 4.12099221197232            | 4.51183522525357  |
| H  | 4.76367139253617  | -1.41568345725704 | 0.41936849321385  | H            | 1.48992800320049      | 3.34041413838462            | 3.95428267107550  |
| H  | 6.47144876337456  | 0.56085953445862  | 3.12337720310253  | H            | 0.86842326444589      | 3.84649044962135            | 5.44458431871231  |
| H  | 5.55790276953739  | 2.06761093527376  | 2.85604672460469  |              |                       |                             |                   |
| H  | 4.75342843933905  | 0.65526484242129  | 3.60053448322469  | <b>TS16*</b> | <b>-318.77 cm**-1</b> | <b>***imaginary mode***</b> |                   |
| Rh | 1.14984672803502  | 3.55422474553218  | 1.37345159589758  | H            | -0.17715322128574     | -0.79458981742522           | 0.86973201057292  |
| C  | 0.51359048709623  | 5.27020100665517  | 2.47301118491574  | C            | -0.79978805781525     | 3.00667951205049            | 0.47352477552486  |
| C  | -0.26267114693569 | 6.25862308739918  | 1.85924813886507  | C            | -0.20668840655859     | 2.09188174455823            | -0.58522285842418 |
| C  | -1.21956837888011 | 6.98150700332532  | 2.56847479834871  | C            | 1.23042281393038      | 1.94218276373652            | -0.14339980562352 |
| C  | -1.39221102334783 | 6.72825651551737  | 3.93031401609266  | H            | 2.05020621434105      | 1.98366294235790            | -0.86628480940778 |
| C  | -0.62214837872498 | 5.76013012908740  | 4.56833454144171  | C            | 1.35737104597420      | 1.38891912310220            | 1.13583965177542  |
| C  | 0.34213553950655  | 5.02444143327687  | 3.86212333923807  | C            | 0.01233489699172      | 1.12951919103120            | 1.78787476280094  |
| H  | -0.12551171011156 | 6.46487166267248  | 0.79559071270925  | C            | -0.65728911489162     | 2.49008903938615            | 1.75248545770172  |
| H  | -1.82078100460536 | 7.73935925421489  | 2.06084792476431  | H            | -1.20597857698666     | 2.89341846594058            | 2.60812127668667  |
| H  | -2.13266789291490 | 7.29009265388385  | 4.50581021277409  | C            | -0.92025015431974     | 0.72299294644651            | -0.50439803723585 |
| H  | -0.75786748350204 | 5.56011868584962  | 5.63528468048214  | H            | -0.49695226732464     | 0.05208386544300            | -1.26676951260619 |
| C  | 3.09778804729774  | 5.64469203446682  | -0.36130552038420 | H            | -1.97959866995743     | 0.87607445793532            | -0.76536924893260 |
| C  | 2.53551783975586  | 6.32282508943538  | 0.88308830132384  | C            | -0.78740949463059     | 0.12524606285830            | 0.91376896346444  |
| C  | 3.45630448367967  | 4.25257205070877  | 0.14702205377344  | C            | -1.71277654396468     | 4.11377384144917            | 0.07542665523414  |
| C  | 2.42191142871405  | 5.32691625061035  | 2.01288491253084  | H            | -2.57449988215782     | 3.69064886802944            | -0.46982519087239 |
| C  | 3.13240702468298  | 4.14500840911592  | 1.56322894118902  | H            | -1.21378285871637     | 4.8177793961932             | -0.60848858296209 |
| H  | 2.62659797163848  | 5.72640335901861  | 3.01071651761668  | H            | -2.08850211046229     | 4.66776507954474            | 0.94529735562344  |
| H  | 3.68206504121902  | 3.47090618038991  | 2.22422699870962  | C            | -2.14811942510089     | -0.24955571417207           | 1.52303367886155  |
| O  | 2.28914176573651  | 7.50166684143743  | 0.96801223360081  | H            | -2.79221892507272     | 0.64861593184265            | 1.46028445420521  |
| O  | 3.98478714768621  | 3.39794726214201  | -0.56265118685008 | C            | -2.80978623337222     | -1.36093914402567           | 0.71269175066225  |
| C  | 2.07153249283480  | 5.61633641734363  | -1.48999566217147 | H            | -2.92312775818724     | -1.09092971712310           | -0.34803223700357 |
| H  | 2.48332417131537  | 5.06804649046271  | -2.35022787279851 | H            | -3.81094680701324     | -1.59424850932728           | 1.10722220656625  |
| H  | 1.14474755484859  | 5.11322115455923  | -1.16936013186271 | H            | -2.20722563269667     | -2.28377142350865           | 0.76008073321584  |
| H  | 1.82464634314505  | 6.64038895495745  | -1.80728814379854 | C            | -2.04792777186773     | -0.65766546867203           | 2.9891799606849   |
| C  | 4.38811800442415  | 6.36752128468394  | -0.81816440244511 | H            | -1.32122535707426     | -1.47749602075615           | 3.12006795594557  |
| H  | 4.69310120861080  | 5.91832385185921  | -1.77509025683533 | H            | -3.02171434587686     | -1.01455960353514           | 3.35897302220104  |
| H  | 4.12117570014042  | 7.41849736755876  | -1.00991092833486 | H            | -1.73627168362900     | 0.17465088999118            | 3.63724486237676  |

|    |                   |                   |                   |              |                       |                             |                   |
|----|-------------------|-------------------|-------------------|--------------|-----------------------|-----------------------------|-------------------|
| C  | 2.56073605186567  | 0.69039363712663  | 1.71007890530058  | C            | 4.41455258096528      | 6.26095530197002            | -0.89816796184402 |
| C  | 5.00905619447704  | 0.26012977322017  | 1.47089213230929  | H            | 4.05598983924612      | 7.27087039279928            | -1.15271860420694 |
| O  | 2.41765271907357  | -0.01236748109433 | 2.71217859944474  | H            | 5.03080520794057      | 6.35849233003018            | 0.01020489842225  |
| H  | 0.16338850179027  | 0.75468478283721  | 2.80404754248291  | C            | 5.26141682770510      | 5.72107103047813            | -2.01642735920217 |
| H  | -0.28303820465860 | 2.53048299086687  | -1.58855759436040 | C            | 6.37676527803704      | 4.91718419484122            | -1.74709137391077 |
| N  | 3.72798282932406  | 0.85572077614546  | 1.06447143758682  | C            | 4.96975519040570      | 6.02647274269028            | -3.35236882812963 |
| H  | 3.79340707874378  | 1.59857679774056  | 0.36007706460192  | C            | 7.16929295926932      | 4.41979233471005            | -2.77990566555065 |
| C  | 5.43280406624673  | 0.78673407826223  | 2.84534571877621  | H            | 6.62613204219467      | 4.67900895518860            | -0.70961970071043 |
| C  | 4.90094683957391  | -1.26642878863000 | 1.48835546632763  | C            | 5.75792456970470      | 5.52790204126228            | -4.38991004894677 |
| C  | 6.03720194741929  | 0.68047237785481  | 0.42118314254918  | H            | 4.11841332633777      | 6.67293812365573            | -3.58208658399646 |
| H  | 7.02153477628382  | 0.25955439587503  | 0.67239397127399  | C            | 6.85967404360400      | 4.72029162085657            | -4.10723625272061 |
| H  | 5.74988025145566  | 0.31491413833985  | -0.57713309711908 | H            | 8.03641774952056      | 3.79595469135165            | -2.54693112215730 |
| H  | 6.12785220582911  | 1.77561206594640  | 0.37081697235396  | H            | 5.51462770304375      | 5.77933429949814            | -5.42566912164926 |
| H  | 5.87633644992721  | -1.70682307728818 | 1.74544118832936  | H            | 7.48118717190269      | 4.33298742980723            | -4.91884735660317 |
| H  | 4.15840156826975  | -1.59869092805481 | 2.22514792933429  | N            | 1.56582915482147      | 3.92838970467867            | 4.44140570983259  |
| H  | 4.60404248679444  | -1.64060466919518 | 0.49621856761512  | H            | 1.81733749038060      | 3.16772029609891            | 3.81682107134464  |
| H  | 6.39882707487704  | 0.34812772493199  | 3.13888843725143  | H            | 1.38434495613873      | 3.61077857423642            | 5.38700949743453  |
| H  | 5.54711147742064  | 1.88161318153003  | 2.82053945013358  |              |                       |                             |                   |
| H  | 4.68550032408140  | 0.52744696854029  | 3.60746250069059  |              |                       |                             |                   |
| Rh | 1.22771596352950  | 3.50780168309622  | 1.34004431481275  | <b>TS16"</b> | <b>-315.30 cm**-1</b> | <b>***imaginary mode***</b> |                   |
| C  | 0.67917841150199  | 5.17610001500984  | 2.55034102995969  | H            | -0.12754711038470     | -0.81967605910859           | 0.87373342427664  |
| C  | -0.17643609332094 | 6.17853209639368  | 2.08448161338181  | C            | -0.85672449421057     | 2.96580015035055            | 0.50525310116054  |
| C  | -1.05243795731506 | 6.84573442563125  | 2.93909340529975  | C            | -0.24736962129895     | 2.07424924114255            | -0.56406839511724 |
| C  | -1.06173301083658 | 6.51910245441101  | 4.29589282813445  | C            | 1.19659038635490      | 1.96112221480902            | -0.13454531146030 |
| C  | -0.21020280522910 | 5.53282843798293  | 4.78567202108399  | H            | 2.00834196589893      | 2.02459846585698            | -0.86543301374571 |
| C  | 0.67382089457878  | 4.85262031637313  | 3.93445750967062  | C            | 1.34904486930341      | 1.40287647109678            | 1.14012409612577  |
| H  | -0.15948948684956 | 6.44931967821372  | 1.02780164364465  | C            | 0.01691874052838      | 1.10370227098885            | 1.80130124493866  |
| H  | -1.71687426668362 | 7.61875118051832  | 2.54599737846034  | C            | -0.68827923316462     | 2.44592923576303            | 1.77972393243254  |
| H  | -1.73636305035523 | 7.03639367243909  | 4.98324288163959  | H            | -1.24112687485652     | 2.82907348511109            | 2.64199967201241  |
| H  | -0.21825275213090 | 5.27417422884529  | 5.84870728291885  | C            | -0.92044063691457     | 0.68474567777739            | -0.48702649755195 |
| C  | 3.14508633323060  | 5.43612950121110  | -0.53789241687652 | H            | -0.48122590800529     | 0.03120798681504            | -1.25546782162138 |
| C  | 2.49416207556811  | 6.16172226171235  | 0.63696074359114  | H            | -1.98521631080601     | 0.80782312646066            | -0.74159655473866 |
| C  | 3.54541743243831  | 4.09846676177490  | 0.07013663933470  | C            | -0.76192216303919     | 0.08319932420908            | 0.92700077161714  |
| C  | 2.51792983562966  | 5.28981469186280  | 1.87112227160923  | C            | -1.80752809618257     | 4.04702383031214            | 0.12495387684952  |
| C  | 3.23036853846798  | 4.08480967243312  | 1.49258438421639  | H            | -2.66662374041953     | 3.59989550561411            | -0.40519152442634 |
| H  | 2.77463532241965  | 5.80263244548239  | 2.80249531015152  | H            | -1.34265555377153     | 4.76681704646898            | -0.56634171319844 |
| H  | 3.79522922912835  | 3.46243601087387  | 2.19072930822366  | H            | -2.18294650865185     | 4.58884155169905            | 1.00265379771803  |
| O  | 2.09401288388147  | 7.30049400860175  | 0.59280964174888  | C            | -2.10758199915328     | -0.33218666053722           | 1.54313600821905  |
| O  | 4.07861691501310  | 3.19769370907404  | -0.57594152628598 | H            | -2.77690661996249     | 0.54797418104390            | 1.48960062739927  |
| C  | 2.18705585183583  | 5.28771840480250  | -1.71157849347038 | C            | -2.74313321074052     | -1.45760792601979           | 0.73114804793822  |
| H  | 2.65487135348871  | 4.69953348854937  | -2.51358510745349 | H            | -2.87129442758469     | -1.18539846216738           | -0.32734356515028 |
| H  | 1.26828805208900  | 4.77028563276281  | -1.39292581051946 | H            | -3.73457485383088     | -1.72139525683129           | 1.13097570627903  |
| H  | 1.91230792763150  | 6.27538516605779  | -2.11071564498359 | H            | -2.11425606898815     | -2.36316139711186           | 0.76934129810384  |
|    |                   |                   |                   | C            | -1.98577875567871     | -0.74503412966959           | 3.00630955335230  |



|    |                   |                   |                   |      |                   |                      |                   |
|----|-------------------|-------------------|-------------------|------|-------------------|----------------------|-------------------|
| H  | -1.23649731979567 | -1.54583319787658 | 3.12786487489504  | H    | 2.49866206386269  | 4.82923609382439     | -2.46737980368334 |
| H  | -2.94687762105064 | -1.12998380759852 | 3.38114386788981  | H    | 1.15125010384250  | 4.83831842328456     | -1.29430686979467 |
| H  | -1.69178041556048 | 0.09202648209833  | 3.65651603558894  | H    | 1.73702744517226  | 6.37507904918257     | -1.98958875985604 |
| C  | 2.57271958475129  | 0.72509768223951  | 1.69500168489822  | C    | 4.37513018256641  | 6.19645938582377     | -0.92348563061292 |
| C  | 5.02512038099946  | 0.34001749974539  | 1.42331428371645  | H    | 5.04456554074768  | 6.23316520471651     | -0.04905344492531 |
| O  | 2.45547421309505  | 0.00942788061256  | 2.69122688412243  | H    | 4.83372162832553  | 5.50492759823953     | -1.64769423898451 |
| H  | 0.18612078689027  | 0.72659451941875  | 2.81378783197056  | C    | 4.26877163745152  | 7.56678339432254     | -1.52918306791197 |
| H  | -0.34370377754610 | 2.51667097039382  | -1.56400423113163 | C    | 4.01065082464937  | 7.72674047338056     | -2.89729445295695 |
| N  | 3.72973437951173  | 0.91941338733765  | 1.03884843939227  | C    | 4.46150039760573  | 8.71466672397282     | -0.75021496915926 |
| H  | 3.77299609550978  | 1.66509377740037  | 0.33684532692368  | C    | 3.93364519724381  | 8.99662286241765     | -3.46837576826712 |
| C  | 5.45455936745657  | 0.85366199033472  | 2.80081332102682  | H    | 3.88287032916355  | 6.84149150037747     | -3.52623675814702 |
| C  | 4.94272597400268  | -1.18821127111795 | 1.41934910872038  | C    | 4.39065605128516  | 9.98592079149896     | -1.31776403215973 |
| C  | 6.03463739671482  | 0.79307542128991  | 0.36954908666075  | H    | 4.67527681978528  | 8.60707730219303     | 0.31655020984451  |
| H  | 7.02958736073351  | 0.38955350816664  | 0.60704416533003  | C    | 4.12250761531402  | 10.13172279813565    | -2.67955003730213 |
| H  | 5.74573371700386  | 0.43299757129629  | -0.63031667449548 | H    | 3.73585228923131  | 9.09953078941090     | -4.53866696770399 |
| H  | 6.10189816879845  | 1.89038107498128  | 0.33164541335866  | H    | 4.55135587085158  | 10.86901361334003    | -0.69369159714694 |
| H  | 5.92774225038471  | -1.61575850113116 | 1.66096952719895  | H    | 4.07044455918571  | 11.12766699440345    | -3.12698187809579 |
| H  | 4.21275371423817  | -1.54349792148657 | 2.15799674407683  | N    | 1.44015917095133  | 3.95577474941008     | 4.46768110358666  |
| H  | 4.64299668461476  | -1.55293516472439 | 0.42453487418001  | H    | 1.71334756187595  | 3.19608295256083     | 3.85086702330891  |
| H  | 6.43214465414304  | 0.42924268182341  | 3.07629318031814  | H    | 1.24576304892308  | 3.64081178324679     | 5.41159459004199  |
| H  | 5.54750679662486  | 1.95082262167939  | 2.79161072033831  |      |                   |                      |                   |
| H  | 4.72115890867924  | 0.56857821243043  | 3.56713086191903  | TS17 | -257.48 cm**-1    | ***imaginary mode*** |                   |
| Rh | 1.16582180897099  | 3.51701612310515  | 1.35581548569161  | H    | 1.41074483976829  | -0.15093613202128    | -0.62642997607787 |
| C  | 0.57911412805517  | 5.18148033231451  | 2.55306741621594  | C    | 0.56486507417953  | 3.52585594915734     | 0.26960335738839  |
| C  | -0.27686105511132 | 6.17147850386118  | 2.06226585221570  | C    | 1.65144964507869  | 3.07438210685375     | -0.69897714311143 |
| C  | -1.17578259793018 | 6.83671969849404  | 2.89428695994695  | C    | 2.78381972845794  | 2.65328906558774     | 0.21921574527353  |
| C  | -1.20728665737697 | 6.52142441441309  | 4.25356962020819  | H    | 3.81775195013799  | 2.92618544658170     | -0.00786586915795 |
| C  | -0.35607347102887 | 5.54750842323804  | 4.76814020118872  | C    | 2.41622740897468  | 1.64576080880688     | 1.10635623539722  |
| C  | 0.54966633079789  | 4.86853252309548  | 3.93906849921414  | C    | 0.96889585631239  | 1.23032302294764     | 0.95201677082095  |
| H  | -0.24411030832322 | 6.43163789850841  | 1.00295011700743  | C    | 0.21784106644856  | 2.52092780176628     | 1.16720648738376  |
| H  | -1.84079385120387 | 7.59922391993544  | 2.48209384874187  | H    | -0.69833356019113 | 2.57475665314925     | 1.75966274952640  |
| H  | -1.89969090310736 | 7.03793229652540  | 4.92363127860247  | C    | 1.14065886013516  | 1.83823446389835     | -1.47405451212287 |
| H  | -0.38202618990405 | 5.29788136921318  | 5.83302265396107  | H    | 1.92353678899817  | 1.50633838167689     | -2.17202689951346 |
| C  | 3.04661076119381  | 5.51584505086778  | -0.48856053167910 | H    | 0.27883965751964  | 2.15160399789244     | -2.08458774403084 |
| C  | 2.42864874139850  | 6.22402470527557  | 0.70973768275462  | C    | 0.73697010856334  | 0.71434433034077     | -0.49468503901083 |
| C  | 3.46224696676835  | 4.16581793081085  | 0.09198772703310  | C    | -0.24725162760591 | 4.75013608026377     | 0.00253919630279  |
| C  | 2.44027972504786  | 5.31081661163816  | 1.91719273499982  | H    | -0.86497856596373 | 4.59229198494586     | -0.89879220090349 |
| C  | 3.15713651007336  | 4.11816670191595  | 1.51326460853366  | H    | 0.39387994240043  | 5.62294855737932     | -0.19162129411833 |
| H  | 2.68156392703223  | 5.78885739932356  | 2.87081340828301  | H    | -0.91533077796330 | 4.97301147665921     | 0.84635806204529  |
| H  | 3.72886641551624  | 3.48374917961798  | 2.19481262441357  | C    | -0.70082738457979 | 0.22040327488379     | -0.72709059985904 |
| O  | 2.02507168198641  | 7.36214464574981  | 0.70646178944722  | H    | -1.35896594612376 | 1.11037982099126     | -0.70765288165021 |
| O  | 4.02993457198474  | 3.30348970184367  | -0.57733294648756 | C    | -0.82721235607778 | -0.42911439701296    | -2.10273389115497 |
| C  | 2.04755117248539  | 5.38359908512371  | -1.63093824912774 | H    | -0.51524626473133 | 0.24744250315134     | -2.91258863418928 |

|    |                   |                   |                   |             |                                            |                   |                   |
|----|-------------------|-------------------|-------------------|-------------|--------------------------------------------|-------------------|-------------------|
| H  | -1.86677465571786 | -0.73237580717596 | -2.30223402355357 | O           | -1.24936197776103                          | 4.37487829345034  | 3.48563758023396  |
| H  | -0.19736631173898 | -1.33288952875296 | -2.16142097687469 | C           | 0.10156537371772                           | 3.64638901842201  | 6.15439612078360  |
| C  | -1.17840353397685 | -0.74408755831992 | 0.35415129274621  | H           | 0.52539851647304                           | 2.97382603483605  | 6.91311290056347  |
| H  | -0.48349778932832 | -1.59488323607846 | 0.45645233555967  | H           | 0.50794495277069                           | 4.65630633534340  | 6.31748042064819  |
| H  | -2.16837796465668 | -1.15229546536351 | 0.09778228949030  | H           | -0.98975627041833                          | 3.68824176619238  | 6.28671876905473  |
| H  | -1.26787222340241 | -0.26286494294650 | 1.33937041751097  | C           | -0.20210596118910                          | 1.76574550705014  | 4.45257477181715  |
| C  | 3.32683403526507  | 0.69128885642548  | 1.82038740951342  | H           | -1.28219696311745                          | 1.95306565239801  | 4.33793854647909  |
| C  | 5.71692209994987  | 0.08777021023654  | 2.25751585606263  | H           | 0.16981993749430                           | 1.41607444539175  | 3.48158630153243  |
| O  | 2.85181962058094  | -0.31214710362693 | 2.35488185550342  | C           | 0.01134773941682                           | 0.67732021789944  | 5.46939500504782  |
| H  | 0.72906092626065  | 0.46257681026490  | 1.69322177882958  | C           | 1.03531638879956                           | -0.26554252604273 | 5.30343351392701  |
| H  | 1.95232904638073  | 3.88519893957517  | -1.37459079401464 | C           | -0.82962783659670                          | 0.55615158421554  | 6.58381387998387  |
| N  | 4.63925153773607  | 0.96366181014592  | 1.77776455604175  | C           | 1.22527861024153                           | -1.28437548852304 | 6.23640438816210  |
| H  | 4.92222792318365  | 1.84110181489528  | 1.35884872355102  | H           | 1.68457607413606                           | -0.20489230129319 | 4.42562394414946  |
| C  | 5.55731902990874  | -0.21739378808438 | 3.74892652399391  | C           | -0.64025444800660                          | -0.46009132495538 | 7.52045669221480  |
| C  | 5.71123010003551  | -1.20896441770010 | 1.44304124991586  | H           | -1.65314748309882                          | 1.26362688242665  | 6.71485922858075  |
| C  | 7.02199700391950  | 0.84274522126629  | 2.01893120852059  | C           | 0.39217567184347                           | -1.38315657429590 | 7.35187782569800  |
| H  | 7.87642480838177  | 0.22570526328444  | 2.33121831052966  | H           | 2.02826340752242                           | -2.01157163988615 | 6.08712549038943  |
| H  | 7.14586859215604  | 1.08526456628454  | 0.95149685460759  | H           | -1.30902014966186                          | -0.53635926115239 | 8.38207467016009  |
| H  | 7.03961238555914  | 1.77935325945952  | 2.59500993455800  | H           | 0.54005307295904                           | -2.18365838407266 | 8.08155388001010  |
| H  | 6.52681762629478  | -1.86950068356543 | 1.77425665736479  | N           | 5.16981583610700                           | 3.26644182429170  | 3.87992024158041  |
| H  | 4.75780628340389  | -1.74015125141783 | 1.56987214063816  | H           | 4.35931479426062                           | 2.89529642024824  | 4.37856396124358  |
| H  | 5.85304710187199  | -0.99103509609089 | 0.37325290794864  | H           | 6.07657026804948                           | 3.16141741693045  | 4.31244500013738  |
| H  | 6.41319913693744  | -0.81409132233622 | 4.09885424023691  | H           | 0.91271858116955                           | 6.04633026665532  | 2.97521555379725  |
| H  | 5.52034799749310  | 0.71530099911474  | 4.32758176223704  |             |                                            |                   |                   |
| H  | 4.63475765313723  | -0.78204936462856 | 3.93518847345636  | <b>TS18</b> | <b>-257.76 cm**-1 ***imaginary mode***</b> |                   |                   |
| Rh | 1.94319991947819  | 3.65717799567219  | 1.93898833600878  | H           | 1.39623422262816                           | -0.13588945297027 | -0.69153579407668 |
| C  | 3.74230921593306  | 4.60237308503493  | 2.43763523880655  | C           | 0.56384125221047                           | 3.53286994242941  | 0.25107595410069  |
| C  | 3.62975646062205  | 5.71654421564588  | 1.59683465380694  | C           | 1.66497729695268                           | 3.09175299602444  | -0.70604372900763 |
| C  | 4.75478981021378  | 6.33817756490593  | 1.04994777501549  | C           | 2.78001728786212                           | 2.65043795173045  | 0.22325107125175  |
| C  | 6.01671269060347  | 5.87491772052562  | 1.42452012048773  | H           | 3.81817838174620                           | 2.92610487927807  | 0.01990647048317  |
| C  | 6.14431649015058  | 4.83921314887039  | 2.34350829327298  | C           | 2.39479141349235                           | 1.62967073191823  | 1.08583941440622  |
| C  | 5.01766517534835  | 4.20425955945083  | 2.90977657785907  | C           | 0.94754113331629                           | 1.22514382301041  | 0.90394902477744  |
| H  | 2.63557862819503  | 6.10278103156130  | 1.34076640724011  | C           | 0.19891985408958                           | 2.51555533879071  | 1.12864247877166  |
| H  | 4.64099207994383  | 7.18279626570281  | 0.36695325689384  | H           | -0.72609626649013                          | 2.56224950121788  | 1.70775946679810  |
| H  | 6.91777320373784  | 6.34637473381954  | 1.02295795415990  | C           | 1.16203306436597                           | 1.87046008960991  | -1.50921236824828 |
| H  | 7.13701926292923  | 4.51402815203109  | 2.66885780429951  | H           | 1.95646529891316                           | 1.54366211987660  | -2.19648057371098 |
| C  | 0.42842171959165  | 3.13730969156063  | 4.73964272204249  | H           | 0.31456137541734                           | 2.19850887170040  | -2.13187284614395 |
| C  | 1.93777433001890  | 3.22349488616661  | 4.56884864507977  | C           | 0.73146738860976                           | 0.73549792369424  | -0.55457946115229 |
| C  | -0.07200280951694 | 4.21327892664634  | 3.76576196896793  | C           | -0.23938228404210                          | 4.76308217364505  | -0.01639768404613 |
| C  | 2.28468853177198  | 4.53437163254752  | 3.91194552450347  | H           | -0.84192370615824                          | 4.61730085147846  | -0.92997503831496 |
| C  | 1.06270539721462  | 5.02042844218957  | 3.32037458563129  | H           | 0.40906139294753                           | 5.63485403358601  | -0.19023523109461 |
| H  | 3.01769679378449  | 5.15385376562627  | 4.43414621300511  | H           | -0.92075134266842                          | 4.97993335758932  | 0.81814906815567  |
| O  | 2.73283755149534  | 2.41841532374799  | 5.02667625311295  | C           | -0.70957250735645                          | 0.26498843372000  | -0.81571038620279 |

|    |                   |                   |                   |             |                                                       |                  |                   |
|----|-------------------|-------------------|-------------------|-------------|-------------------------------------------------------|------------------|-------------------|
| H  | -1.35565439907397 | 1.16363072226705  | -0.79081535536090 | C           | 1.00745948205403                                      | 5.01670095872000 | 3.28496306995528  |
| C  | -0.82602731859546 | -0.36016949225035 | -2.20347536602399 | H           | 2.92537706503729                                      | 5.14036800530792 | 4.46402631591335  |
| H  | -0.49413868220237 | 0.32517221365829  | -2.99786906679120 | O           | 2.57598435933047                                      | 2.40359618656809 | 5.06799450186151  |
| H  | -1.86694763585449 | -0.64550895189227 | -2.42151291147744 | O           | -1.31678904274688                                     | 4.39884077799841 | 3.36860511729966  |
| H  | -0.20791667813404 | -1.27151920930550 | -2.26868701873351 | C           | -0.25134916222664                                     | 1.75281578965620 | 4.41281964356431  |
| C  | -1.21635437838996 | -0.70986633915253 | 0.24249241660272  | H           | -1.34726251052634                                     | 1.80013934635345 | 4.33076405426651  |
| H  | -0.53590362210018 | -1.57283033883642 | 0.33962288831874  | H           | 0.15372200789605                                      | 1.32529268042069 | 3.48764249192673  |
| H  | -2.20892486371784 | -1.09827313491435 | -0.03392476429479 | H           | 0.00690097805355                                      | 1.07899302434999 | 5.24230589407793  |
| H  | -1.31167435482763 | -0.24331607778260 | 1.23415102269429  | C           | -0.12932294357975                                     | 3.58726128961519 | 6.10331405425255  |
| C  | 3.29039524249876  | 0.66173132952260  | 1.80060206192143  | H           | -1.22935668931183                                     | 3.54074791941941 | 6.12222316572682  |
| C  | 5.67199107894968  | 0.03166355845401  | 2.24574870920576  | H           | 0.24812178401381                                      | 2.82704991184666 | 6.80470075045052  |
| O  | 2.80168871915622  | -0.34144492785761 | 2.32106841870328  | C           | 0.33744294071048                                      | 4.95280999440492 | 6.52173531172662  |
| H  | 0.69375734526427  | 0.44652807239726  | 1.62894004089808  | C           | 1.57101520852203                                      | 5.11989056095050 | 7.16399440066898  |
| H  | 1.98039462843200  | 3.91191459610043  | -1.36353733286189 | C           | -0.43156619618359                                     | 6.09060563367547 | 6.24516114542669  |
| N  | 4.60629367005313  | 0.923797979151897 | 1.77010727948207  | C           | 2.02903877435391                                      | 6.38998733045584 | 7.51317596188848  |
| H  | 4.89941347746329  | 1.80745923904840  | 1.37185474781709  | H           | 2.17929256785149                                      | 4.24023119167801 | 7.39300628916806  |
| C  | 5.49134524969203  | -0.30504080277813 | 3.72780313851947  | C           | 0.02335339835093                                      | 7.36181309902257 | 6.59188055109161  |
| C  | 5.66797171466782  | -1.24736827312687 | 1.40338311286857  | H           | -1.39840556335041                                     | 5.97468537252989 | 5.74823260956542  |
| C  | 6.98503903520820  | 0.78240622168987  | 2.04148096721510  | C           | 1.25729092690520                                      | 7.51599584759320 | 7.22524644706647  |
| H  | 7.83111819713351  | 0.15171082225845  | 2.34933409099257  | H           | 2.99252906349672                                      | 6.49999596767045 | 8.01765070027300  |
| H  | 7.12437273719640  | 1.04983090473168  | 0.98189326534633  | H           | -0.59178867661271                                     | 8.23764241790909 | 6.36914277529510  |
| H  | 7.00305274448493  | 1.70480963021846  | 2.64038638205419  | H           | 1.61359204200333                                      | 8.51213150771872 | 7.49987898522737  |
| H  | 6.47349000785771  | -1.92196446534695 | 1.73092988494829  | N           | 5.06209586479620                                      | 3.16594394381638 | 3.96445657993431  |
| H  | 4.70861773517038  | -1.77326410944622 | 1.50607018459055  | H           | 4.22977860169311                                      | 2.82341190350085 | 4.44690950226296  |
| H  | 5.82564699494968  | -1.00741935959306 | 0.34055141002479  | H           | 5.95484156413358                                      | 3.03250685087401 | 4.41790938524024  |
| H  | 6.33272275439854  | -0.92488063278903 | 4.07263228526646  | H           | 0.87973486463458                                      | 6.04046614629028 | 2.92523627897865  |
| H  | 5.46402147463513  | 0.61485852188806  | 4.32729726118391  |             |                                                       |                  |                   |
| H  | 4.55619357535983  | -0.85614565229240 | 3.88913714765288  | <b>TS19</b> | <b>-323.42 cm**<sup>-1</sup> ***imaginary mode***</b> |                  |                   |
| Rh | 1.91113191487919  | 3.63468894877558  | 1.94305618218394  | H           | 0.48090456916868                                      | 0.01309357678885 | -0.32069712135036 |
| C  | 3.70932702080668  | 4.55030077286851  | 2.49622239276137  | C           | 0.85427480992677                                      | 3.85076499426481 | 0.04936974518041  |
| C  | 3.64992579227111  | 5.67044463846220  | 1.65755999115823  | C           | 1.67322661393015                                      | 2.97409327012039 | -0.88484263280026 |
| C  | 4.80561823779957  | 6.26450838226521  | 1.14499800443540  | C           | 2.70857134701234                                      | 2.37462703608457 | 0.03893496338384  |
| C  | 6.04429323171089  | 5.76675616946517  | 1.55146528009256  | H           | 3.75510478071007                                      | 2.30255620426711 | -0.27025912483985 |
| C  | 6.11902486274315  | 4.72427919207681  | 2.46860212315689  | C           | 2.14222149522762                                      | 1.62465648366742 | 1.07326481271213  |
| C  | 4.96087454434235  | 4.11619692269219  | 2.99961420488711  | C           | 0.62540038007990                                      | 1.65257250174323 | 1.05255626869954  |
| H  | 2.67393215516149  | 6.08331535334491  | 1.37551715652879  | C           | 0.31468044380967                                      | 3.13059726954037 | 1.11245012061110  |
| H  | 4.73291632839699  | 7.11431831079068  | 0.46279615193036  | H           | -0.49243715373081                                     | 3.52969425614879 | 1.73366480404109  |
| H  | 6.96824844409354  | 6.21553976711318  | 1.17681614969279  | C           | 0.75983777957390                                      | 1.86028964708602 | -1.44341796295633 |
| H  | 7.09368363019941  | 4.37143211710398  | 2.81870263880396  | H           | 1.34786083287725                                      | 1.21277928419027 | -2.11101271679986 |
| C  | 0.30328809101439  | 3.14226378896846  | 4.67368909800632  | H           | -0.01643773225772                                     | 2.33748259789599 | -2.06259448915182 |
| C  | 1.81811613247612  | 3.22526329727127  | 4.57420181925796  | C           | 0.11921628260982                                      | 1.05666606561171 | -0.28960117849268 |
| C  | -0.15052564510109 | 4.22214069498789  | 3.68834856822350  | C           | 0.37344078289196                                      | 5.18065122189902 | -0.42108503721578 |
| C  | 2.20476120439554  | 4.52387152274892  | 3.92211988826214  | H           | -0.32257331404581                                     | 5.02568356880803 | -1.26447540461267 |

|    |                   |                   |                   |             |                                            |                   |                   |
|----|-------------------|-------------------|-------------------|-------------|--------------------------------------------|-------------------|-------------------|
| H  | 1.20126586155414  | 5.79934850744409  | -0.79720211754749 | C           | 1.70666303469273                           | 6.59620578515229  | 2.33968372764944  |
| H  | -0.15080598938062 | 5.73337049117044  | 0.36790559849983  | C           | 4.01265079094026                           | 6.30508839319175  | 2.85915847884036  |
| C  | -1.41520983965129 | 1.01696273951351  | -0.38682822893587 | C           | 1.87324534577876                           | 5.29369490156731  | 2.97605108175573  |
| H  | -1.76404761516699 | 2.06423207726985  | -0.47070673118991 | C           | 3.27320344619955                           | 5.04075230588143  | 3.26581818348362  |
| C  | -1.85366395291715 | 0.27287509010618  | -1.64526546859204 | H           | 1.05510237427751                           | 4.91170299808591  | 3.59735797703931  |
| H  | -1.42102241158496 | 0.70860362192348  | -2.55838350587726 | O           | 0.65572205034384                           | 7.15669615527443  | 2.07860113161763  |
| H  | -2.94946495089460 | 0.29128660023151  | -1.75309506011822 | O           | 5.14274416453304                           | 6.56720148766444  | 3.18973455093970  |
| H  | -1.53902051737190 | -0.78344724882551 | -1.59730394837655 | C           | 3.08877374551174                           | 8.62561599984016  | 2.77273675449793  |
| C  | -2.07184668455479 | 0.39764856093482  | 0.84276600403985  | H           | 2.37500259406070                           | 9.28737823096027  | 2.26121640218313  |
| H  | -1.66857667639792 | -0.61060750958935 | 1.03772259962369  | H           | 2.79913488886534                           | 8.55807394272489  | 3.83236100686697  |
| H  | -3.15826537342999 | 0.29843740819475  | 0.69299430328943  | H           | 4.09197557132925                           | 9.06927860056364  | 2.71530313278307  |
| H  | -1.91952902722252 | 1.00091718062172  | 1.74967260348399  | C           | 3.36461352127678                           | 7.32828432877137  | 0.59566523204766  |
| C  | 2.77511161473200  | 0.50680960350255  | 1.84906676817615  | H           | 3.46083219955501                           | 6.30627952189573  | 0.19381951687513  |
| C  | 4.80831362947469  | -0.93798093332199 | 2.05824811327919  | H           | 2.45997884341394                           | 7.76283585320885  | 0.14206176684103  |
| O  | 2.08389345520792  | -0.16327244063046 | 2.61780982220703  | C           | 4.55699591937058                           | 8.16104951835698  | 0.21373495834277  |
| H  | 0.23981719783355  | 1.10032480090145  | 1.91416571685883  | C           | 4.38459512824361                           | 9.50135584022318  | -0.15692142317066 |
| H  | 2.13102282202140  | 3.56482500798629  | -1.68880968083198 | C           | 5.85670475908900                           | 7.63873421100243  | 0.22817282769201  |
| N  | 4.07343667432658  | 0.25476855352599  | 1.60974827833677  | C           | 5.47597181344199                           | 10.30085722430171 | -0.49463568856122 |
| H  | 4.55342273531709  | 0.86107195292662  | 0.95612797099401  | H           | 3.37533500593292                           | 9.92214267252595  | -0.18322005292225 |
| C  | 4.85525139292634  | -1.01957070526914 | 3.58492883076534  | C           | 6.95070213095627                           | 8.43385966636033  | -0.11059411461601 |
| C  | 4.14139333629450  | -2.19039450192613 | 1.48165147160618  | H           | 6.01913505839065                           | 6.59682311637014  | 0.51123269640214  |
| C  | 6.22440448119541  | -0.80433168576805 | 1.50498039102944  | C           | 6.76527896377856                           | 9.76908082929619  | -0.47103982541769 |
| H  | 6.82693018077306  | -1.67637476242831 | 1.79671184808070  | H           | 5.31701976191409                           | 11.34360652354375 | -0.78205013693834 |
| H  | 6.21307131427066  | -0.74862537502780 | 0.40471158201986  | H           | 7.95635791324887                           | 8.00561680532683  | -0.09496015022131 |
| H  | 6.71079296903994  | 0.10175336847425  | 1.89613760507972  | H           | 7.62302547145495                           | 10.39167716081535 | -0.73824029674091 |
| H  | 4.70265781708511  | -3.08879139496941 | 1.77970973817743  | N           | 3.82581480779692                           | 2.38577126394508  | 4.47387835693108  |
| H  | 3.11026162680550  | -2.28527437423693 | 1.84871550567265  | H           | 2.85942686463918                           | 2.29393256126496  | 4.17766968692522  |
| H  | 4.11983577709837  | -2.14242816111509 | 0.38198153507090  | H           | 4.11748741327138                           | 1.64983449092763  | 5.10588819151957  |
| H  | 5.38758842456203  | -1.93328427751943 | 3.88937664044220  | H           | 3.53249552000683                           | 4.67198479322184  | 4.26486761785965  |
| H  | 5.39093270679961  | -0.15713703591345 | 4.00287928140123  |             |                                            |                   |                   |
| H  | 3.84157495831936  | -1.04493603676445 | 4.00459772257755  | <b>TS20</b> | <b>-323.36 cm**-1 ***imaginary mode***</b> |                   |                   |
| Rh | 2.31341833327371  | 3.69575175779779  | 1.70001476580323  | H           | 0.54838518668124                           | 0.06533702694885  | -0.34904402825050 |
| C  | 4.30563306691798  | 3.62530977241411  | 2.45686735495137  | C           | 0.77783607547179                           | 3.90051370860560  | 0.12673918446468  |
| C  | 5.25528614153772  | 4.00649878140861  | 1.49255465296061  | C           | 1.62981347610136                           | 3.08435872196546  | -0.83244775941628 |
| C  | 6.57516810164033  | 3.57466473725187  | 1.54070638925940  | C           | 2.69136654959168                           | 2.49879666994941  | 0.07060695452254  |
| C  | 6.98942259704081  | 2.78644661058402  | 2.61887804240979  | H           | 3.73859481457478                           | 2.47462596572881  | -0.24361772241977 |
| C  | 6.07627265504575  | 2.39344327450161  | 3.58909576870977  | C           | 2.15868366358743                           | 1.69709361180126  | 1.08405129505177  |
| C  | 4.72318048411016  | 2.76197643452089  | 3.50258151424364  | C           | 0.64249049216756                           | 1.66919870760624  | 1.07019314294794  |
| H  | 4.94391460179380  | 4.66819406142118  | 0.68045415342329  | C           | 0.27715941533964                           | 3.13140521501577  | 1.17397526789832  |
| H  | 7.28149749021833  | 3.87856247301579  | 0.76469058492642  | H           | -0.54242842336886                          | 3.48052370877169  | 1.80886348496716  |
| H  | 8.03350812994632  | 2.47433381681279  | 2.70495007488276  | C           | 0.75818041225052                           | 1.95171329042029  | -1.41997945453370 |
| H  | 6.40336125853426  | 1.78107845884605  | 4.43372032993127  | H           | 1.36917203780965                           | 1.34490945894577  | -2.10492468764382 |
| C  | 3.07537649277808  | 7.24691001962172  | 2.11618510234251  | H           | -0.03710470628286                          | 2.41501518340998  | -2.02538468520990 |

|    |                   |                   |                   |             |                                            |                   |                   |
|----|-------------------|-------------------|-------------------|-------------|--------------------------------------------|-------------------|-------------------|
| C  | 0.15096106734016  | 1.09448163061051  | -0.28679611370369 | H           | 7.98551200526797                           | 2.58912840000732  | 2.79619659006282  |
| C  | 0.22027803573725  | 5.21008370703015  | -0.31553075944732 | H           | 6.33675875470563                           | 1.83306269606763  | 4.48170106820618  |
| H  | -0.46920107039621 | 5.02755485134694  | -1.15872045362762 | C           | 2.94670968793975                           | 7.26346661787824  | 2.12792346128278  |
| H  | 1.00551753265047  | 5.88590038338088  | -0.68339480929956 | C           | 1.58777117697337                           | 6.61663049415066  | 2.40213720709467  |
| H  | -0.33297721381998 | 5.71475120258048  | 0.48546102663600  | C           | 3.89811948912149                           | 6.37748574890976  | 2.92075756933974  |
| C  | -1.38154361717473 | 1.00568571173542  | -0.37881437107812 | C           | 1.78260806787785                           | 5.33015749190801  | 3.06526281811622  |
| H  | -1.76580795082945 | 2.04254590479504  | -0.43359501074718 | C           | 3.18945139303752                           | 5.10734810857938  | 3.35205945212233  |
| C  | -1.80179061422456 | 0.28096708620644  | -1.65455870343324 | H           | 0.97276974310581                           | 4.93690700229241  | 3.6895954798997   |
| H  | -1.38721484924339 | 0.75415788056520  | -2.55734661267233 | O           | 0.52399399970225                           | 7.15368790497265  | 2.14236790264216  |
| H  | -2.89808771888277 | 0.26763137259881  | -1.75786460214035 | O           | 5.02556610563222                           | 6.67456998068916  | 3.22914953714390  |
| H  | -1.45382418222301 | -0.76573876606054 | -1.63561913531511 | C           | 3.28452862424356                           | 7.21133288021215  | 0.63522742935251  |
| C  | -2.01109668025865 | 0.33358751329454  | 0.83712206417599  | H           | 4.30080889157260                           | 7.59564247617691  | 0.46122434295578  |
| H  | -1.57269951809495 | -0.66469604496392 | 1.00603536605133  | H           | 3.22315694981880                           | 6.18328680865131  | 0.24535250513856  |
| H  | -3.09410512565396 | 0.20076586912150  | 0.68878549660677  | H           | 2.56967561337650                           | 7.83271100274778  | 0.07546181521843  |
| H  | -1.87568152886287 | 0.91913950932964  | 1.75822506827777  | C           | 2.98643680511964                           | 8.72297671209426  | 2.61913401151839  |
| C  | 2.83059304479698  | 0.57491265611857  | 1.81914220460420  | H           | 4.00082165750225                           | 9.10507620090205  | 2.42686340449482  |
| C  | 4.89546726943332  | -0.83106182106078 | 1.95187132708414  | H           | 2.29200091575903                           | 9.29186745575898  | 1.98264360915699  |
| O  | 2.16544926816846  | -0.13631051557740 | 2.57383978732820  | C           | 2.62703017530699                           | 8.92853720366825  | 4.06803010004958  |
| H  | 0.28153602800319  | 1.07847714554186  | 1.91663464726751  | C           | 1.30068017896674                           | 9.17790909070208  | 4.44751292833588  |
| H  | 2.06148829393337  | 3.71487379355876  | -1.62065055535371 | C           | 3.60572283931444                           | 8.87885932515658  | 5.07038517794913  |
| N  | 4.13160038609649  | 0.362541115250962 | 1.55701110222403  | C           | 0.96028521320356                           | 9.36227903225785  | 5.78691580084773  |
| H  | 4.58607859357876  | 0.99601924757062  | 0.91075414708572  | H           | 0.52769868418870                           | 9.22231337443193  | 3.67678188924238  |
| C  | 4.94631529765950  | -0.97983896686568 | 3.47348377309596  | C           | 3.26848064648368                           | 9.06250667624680  | 6.41123153962743  |
| C  | 4.25561808392304  | -2.07156807213422 | 1.32097628555365  | H           | 4.64645077410702                           | 8.69715269751486  | 4.79200983323971  |
| C  | 6.30706744390449  | -0.64154685752098 | 1.40402055750259  | C           | 1.94330655814707                           | 9.30251230651925  | 6.77519410607197  |
| H  | 6.92982750157367  | -1.51068041568857 | 1.65959155609190  | H           | -0.08006733764261                          | 9.55862186747602  | 6.05998921066878  |
| H  | 6.29288006187018  | -0.54165335663283 | 0.30683143422098  | H           | 4.04844549235892                           | 9.02433745102285  | 7.17643173571712  |
| H  | 6.77292356494761  | 0.25925027428012  | 1.83102527669161  | H           | 1.67806544362221                           | 9.44968560089762  | 7.82542835126156  |
| H  | 4.83643351692572  | -2.96999657121479 | 1.57893300846882  | N           | 3.75646549249574                           | 2.41541464880443  | 4.50348183622489  |
| H  | 3.22733908261415  | -2.20453873759439 | 1.68446331119237  | H           | 2.79327560334275                           | 2.33459844423235  | 4.19421725232244  |
| H  | 4.23144267058502  | -1.97622263325720 | 0.22440184174254  | H           | 4.04341857229505                           | 1.65579076071941  | 5.10928085645984  |
| H  | 5.51069537580617  | -1.88710682729246 | 3.73679244225896  | H           | 3.46382506230064                           | 4.74841573912658  | 4.35052191230449  |
| H  | 5.45002957135039  | -0.11844825048654 | 3.93153227219204  |             |                                            |                   |                   |
| H  | 3.93418634240890  | -1.05964454113041 | 3.88927472689566  | <b>TS21</b> | <b>-331.69 cm**-1 ***imaginary mode***</b> |                   |                   |
| Rh | 2.25815612291662  | 3.75642484594146  | 1.76782118670111  | H           | 1.33682553641201                           | -0.07508675061550 | -0.73622967587926 |
| C  | 4.25241990477598  | 3.72059812155954  | 2.53122715162196  | C           | 0.68568168061491                           | 3.57137858306515  | 0.42687008334277  |
| C  | 5.21387283611895  | 4.14500232988468  | 1.59640642415063  | C           | 1.75256044866841                           | 3.14048762646307  | -0.57181356492671 |
| C  | 6.53557484139846  | 3.71877179889071  | 1.64978820647292  | C           | 2.86134582885265                           | 2.61592336688240  | 0.32046486295284  |
| C  | 6.94047342218306  | 2.89713084477740  | 2.70616739957686  | H           | 3.90606159152216                           | 2.86967759550627  | 0.12003322716110  |
| C  | 6.01760205832709  | 2.46891226031785  | 3.65159586617931  | C           | 2.4507774286641                            | 1.55067481208061  | 1.12002982187913  |
| C  | 4.66308568866409  | 2.82993064583352  | 3.55690085642840  | C           | 0.98469790050666                           | 1.21266056055626  | 0.94386149324852  |
| H  | 4.91731516938656  | 4.84287607895129  | 0.80930372606375  | C           | 0.29760617067448                           | 2.51995012622426  | 1.25803607731947  |
| H  | 7.25199820941467  | 4.05536158920352  | 0.89697428183647  | H           | -0.60771550291804                          | 2.57066101850964  | 1.86976642118305  |

|    |                   |                   |                   |      |                   |                      |                   |
|----|-------------------|-------------------|-------------------|------|-------------------|----------------------|-------------------|
| C  | 1.18799263126566  | 1.98535404618399  | -1.43063028167654 | C    | 4.61463121495453  | 5.01312972572079     | 2.12853228581323  |
| H  | 1.95834001016162  | 1.66264528399164  | -2.14670527757664 | H    | 4.24298353829145  | 2.39844949357624     | 4.29589384034024  |
| H  | 0.34774513076803  | 2.38308100584890  | -2.02170409710405 | H    | 6.70154793263688  | 2.56663216530974     | 4.35112582980994  |
| C  | 0.71907180527215  | 0.81823349296289  | -0.53365434458692 | H    | 7.85136074454772  | 4.32142682464423     | 2.98274572720726  |
| C  | -0.09844410367138 | 4.82396489902955  | 0.21286749406860  | H    | 6.51536577227127  | 5.85295310497979     | 1.55994182873032  |
| H  | -0.69133832058433 | 4.73091379242621  | -0.71378224585685 | C    | 0.72657143752071  | 3.44368097695950     | 5.09784853611627  |
| H  | 0.56099437722033  | 5.69686283082693  | 0.09046417104528  | C    | 2.18157993849979  | 3.89805321211741     | 5.12355381104534  |
| H  | -0.78819745447108 | 5.00802672223764  | 1.04827968741223  | C    | 0.13817190846026  | 4.27632726136657     | 3.95275898709681  |
| C  | -0.74810747553986 | 0.43339476730613  | -0.78971745417401 | C    | 2.48384124458505  | 4.77839145726412     | 3.92455625730027  |
| H  | -1.34844575451291 | 1.35843386359974  | -0.69342192061228 | C    | 1.20508687601757  | 5.00960000204430     | 3.28001818303826  |
| C  | -0.92609117613649 | -0.09880475371983 | -2.20909987841844 | H    | 3.13275119113758  | 5.62899289284056     | 4.15373155138325  |
| H  | -0.57784997563774 | 0.61734177654060  | -2.96852475255645 | O    | 2.95427828980579  | 3.68268650387599     | 6.02667274873094  |
| H  | -1.98461796200931 | -0.31901038069262 | -2.41784221067190 | O    | -1.05726491850519 | 4.32236059184652     | 3.70145693674599  |
| H  | -0.35637566704201 | -1.03356408155803 | -2.34538325701536 | C    | 0.04392992925282  | 3.82496294179005     | 6.40930358666180  |
| C  | -1.27930125601627 | -0.57844034325593 | 0.22066758876740  | H    | 0.51426633070844  | 3.30189581245439     | 7.25316705802250  |
| H  | -0.63837123248515 | -1.47587032001444 | 0.25319917342072  | H    | 0.11532399611355  | 4.90834590736340     | 6.59034006528630  |
| H  | -2.29429086307242 | -0.90420389857084 | -0.05550899283450 | H    | -1.02024753674967 | 3.55139141057351     | 6.36599617476179  |
| H  | -1.33288229284457 | -0.16685762634653 | 1.23930136533832  | C    | 0.56502858371923  | 1.93906113670255     | 4.76862038844752  |
| C  | 3.30876572722264  | 0.51849970267746  | 1.78586079764788  | H    | -0.50824744925298 | 1.78341642404000     | 4.57323990896382  |
| C  | 5.65181011156588  | -0.30167314949844 | 2.11408005129242  | H    | 1.09769972764869  | 1.73873178532496     | 3.82275303520862  |
| O  | 2.77786098338322  | -0.43497863134258 | 2.35737845156336  | C    | 1.04119448694036  | 0.98024795015478     | 5.82082325545125  |
| H  | 0.71068947488605  | 0.41158994308833  | 1.63639393966278  | C    | 2.34001071715398  | 0.45975618794647     | 5.77316147232159  |
| H  | 2.08762693649277  | 3.98116792543970  | -1.19260838309959 | C    | 0.19938613375909  | 0.57231805882203     | 6.86416825687336  |
| N  | 4.63932414255945  | 0.66844121158013  | 1.67338986843683  | C    | 2.79338994532194  | -0.43108645057144    | 6.74421627816086  |
| H  | 4.97941486344621  | 1.49941219981085  | 1.20587267214827  | H    | 2.99619179008603  | 0.73907872216285     | 4.94621963390855  |
| C  | 5.56946452320403  | -0.52935730037388 | 3.62555587436724  | C    | 0.64843930432373  | -0.31759811633388    | 7.83957595173797  |
| C  | 5.45320647440425  | -1.62455945061827 | 1.36830346261293  | H    | -0.82597806266405 | 0.95005011194186     | 6.90543050952800  |
| C  | 7.00923181720744  | 0.29206999796564  | 1.74666125533383  | C    | 1.94917867297005  | -0.81966185204700    | 7.78518382763430  |
| H  | 7.81310372239798  | -0.39493277275910 | 2.04696544645171  | H    | 3.80966429044318  | -0.82936057070671    | 6.68223200184295  |
| H  | 7.08404404628534  | 0.45268224076614  | 0.65930104351031  | H    | -0.02503182037185 | -0.62652283533178    | 8.64348042623818  |
| H  | 7.16876317893735  | 1.25530823884374  | 2.25353606275692  | H    | 2.30014421179306  | -1.52054891356200    | 8.54702866104343  |
| H  | 6.22906754325175  | -2.34516774445737 | 1.66779940435347  | N    | 3.90850987996678  | 5.88145107612385     | 1.32914828392390  |
| H  | 4.46859559820702  | -2.05419948981724 | 1.59651804157026  | H    | 4.35505036381743  | 6.75829550706329     | 1.08787812239287  |
| H  | 5.52693176600251  | -1.46751600381881 | 0.28111702335105  | H    | 2.90675836424783  | 5.94626122684686     | 1.46580681947468  |
| H  | 6.35241750456457  | -1.23669028329221 | 3.93777989546136  | H    | 0.96610905421936  | 5.91383494276586     | 2.71296296061455  |
| H  | 5.71682576541136  | 0.41218071599583  | 4.17279355636387  |      |                   |                      |                   |
| H  | 4.59106502290917  | -0.94423439482119 | 3.90030326954563  | TS22 | -331.82 cm**-1    | ***imaginary mode*** |                   |
| Rh | 2.03636326264532  | 3.48890905139133  | 2.10744345296234  | H    | 1.34509230849211  | -0.03526526751519    | -0.83015103265479 |
| C  | 3.95500042353770  | 4.01737978409448  | 2.90540873413050  | C    | 0.67614955080948  | 3.58853061003420     | 0.39357415967486  |
| C  | 4.73573114008359  | 3.15266472875922  | 3.68211273343568  | C    | 1.74910378119981  | 3.18189294726768     | -0.60980617476661 |
| C  | 6.12395970556715  | 3.24653873853562  | 3.72124792177646  | C    | 2.86037924338823  | 2.65272005989101     | 0.27765203020340  |
| C  | 6.76272648939013  | 4.22466653799273  | 2.95757912886324  | H    | 3.90354936113043  | 2.92256909507397     | 0.090143359175972 |
| C  | 6.01731288490271  | 5.08700760231994  | 2.16159286539468  | C    | 2.45425817606997  | 1.57211256715618     | 1.05878211752917  |

|    |                   |                   |                   |            |                   |                   |                   |
|----|-------------------|-------------------|-------------------|------------|-------------------|-------------------|-------------------|
| C  | 0.99190212943623  | 1.22478218261693  | 0.87211535970054  | C          | 6.10532331451836  | 3.20116153011464  | 3.64493366584760  |
| C  | 0.29588120341956  | 2.52131645994159  | 1.20858130619641  | C          | 6.74520878472281  | 4.19837980846498  | 2.90711167721106  |
| H  | -0.60580359754006 | 2.55570274095875  | 1.82667836595634  | C          | 6.00079919567234  | 5.09357416240570  | 2.14726354433009  |
| C  | 1.19605995931059  | 2.03716086316687  | -1.48909355820415 | C          | 4.59739018934753  | 5.03224370430128  | 2.12551701941217  |
| H  | 1.97280710963090  | 1.72899904677447  | -2.20468785239729 | H          | 4.21889107164584  | 2.34641669183622  | 4.20607697284949  |
| H  | 0.35737873849316  | 2.43849367686910  | -2.07993158552545 | H          | 6.68487159478317  | 2.49542347422431  | 4.24369426960078  |
| C  | 0.72807406313567  | 0.85483322858963  | -0.61168005265323 | H          | 7.83499890125346  | 4.28364263867592  | 2.92399599859658  |
| C  | -0.11674666839779 | 4.83839799832080  | 0.19655704819994  | H          | 6.50041728811220  | 5.87366732790097  | 1.56538519766971  |
| H  | -0.69948859759304 | 4.75911890966176  | -0.73780674059305 | C          | 0.79380973366730  | 3.34256544275104  | 5.08943062394332  |
| H  | 0.53617902110270  | 5.71932092129136  | 0.09845815250490  | C          | 2.22180491000624  | 3.87670612190090  | 5.10817904449436  |
| H  | -0.81728721545379 | 4.99999928882569  | 1.02755054961675  | C          | 0.14890957189833  | 4.14499007930051  | 3.95492676745895  |
| C  | -0.74016696575505 | 0.47640544035248  | -0.87271152751470 | C          | 2.46533267256980  | 4.77007653147039  | 3.90961974596237  |
| H  | -1.33779454901081 | 1.40192741612484  | -0.76518245084674 | C          | 1.16502869802945  | 4.95744319729106  | 3.29338926195367  |
| C  | -0.92006313096711 | -0.03740792437154 | -2.29845406273909 | H          | 3.09324974555194  | 5.64111974651749  | 4.12035466855338  |
| H  | -0.56736892672058 | 0.68611092313661  | -3.04880581151486 | O          | 3.02138015891373  | 3.66937679201804  | 5.98948627469393  |
| H  | -1.97975762722551 | -0.24890183974031 | -2.51035699392492 | O          | -1.04813248738532 | 4.11518328679594  | 3.70274549591520  |
| H  | -0.35575794904342 | -0.97372009547948 | -2.44612637098109 | C          | 0.78370723211727  | 1.83949122211165  | 4.80818587182791  |
| C  | -1.27549927444388 | -0.54541342297155 | 0.12528278046596  | H          | -0.25311956228497 | 1.49590825278582  | 4.67436491204316  |
| H  | -0.63822818492404 | -1.44576063296506 | 0.14776612970675  | H          | 1.34824095032557  | 1.60143397436972  | 3.89220082145941  |
| H  | -2.29163270008492 | -0.86387222186295 | -0.15522779975418 | H          | 1.23503380227899  | 1.29197581245967  | 5.64927668756516  |
| H  | -1.32823257119135 | -0.14543780156484 | 1.14853930908862  | C          | 0.07858312850305  | 3.62773600952185  | 6.42638807352772  |
| C  | 3.30880350018560  | 0.54682491633284  | 1.73939105319990  | H          | -0.92731732568686 | 3.18776443907182  | 6.35089011330437  |
| C  | 5.64233501054169  | -0.32152846949306 | 2.01149136969716  | H          | 0.62244664040102  | 3.07932833742433  | 7.21089022884620  |
| O  | 2.77580531413468  | -0.36389388334218 | 2.37604482025219  | C          | -0.02975799136458 | 5.08351555613014  | 6.79659301276392  |
| H  | 0.72262665554990  | 0.41148587716296  | 1.55180379740978  | C          | 0.98592117604145  | 5.72047368066351  | 7.52274379316642  |
| H  | 2.07910006297102  | 4.03551433494176  | -1.21557894535227 | C          | -1.14884165113936 | 5.83819190570945  | 6.41813829701563  |
| N  | 4.63702519817857  | 0.65652569360240  | 1.57109671528724  | C          | 0.89020082443466  | 7.07188795748920  | 7.85422620881413  |
| H  | 4.97437725101679  | 1.43825854861002  | 1.02363109302651  | H          | 1.86006580299126  | 5.14500641993497  | 7.83733177068679  |
| C  | 5.58838278399145  | -0.51996058049497 | 3.52790917658625  | C          | -1.24836873499690 | 7.18890647519116  | 6.74912968122995  |
| C  | 5.40240717171218  | -1.65436281120922 | 1.29569597450897  | H          | -1.95030413837260 | 5.35477926043014  | 5.85436176506632  |
| C  | 7.00129490682365  | 0.24372411419090  | 1.60748629695244  | C          | -0.22724853009348 | 7.81206493515300  | 7.46730109180712  |
| H  | 7.80031937963380  | -0.45002559178132 | 1.90523471548222  | H          | 1.69115009571571  | 7.54779821986364  | 8.42616968081827  |
| H  | 7.05862035201052  | 0.38394794674102  | 0.51615732731121  | H          | -2.13291159477284 | 7.75694462465071  | 6.44852482990443  |
| H  | 7.18370358280362  | 1.21333085885903  | 2.09469448392480  | H          | -0.30616231533121 | 8.86974579784162  | 7.73193564281663  |
| H  | 6.16702895642813  | -2.38725635777662 | 1.59441406898973  | N          | 3.89002129186956  | 5.92844274588708  | 1.35873279397675  |
| H  | 4.41294382684955  | -2.05655397327700 | 1.55272851765008  | H          | 4.34237326971863  | 6.80729650211923  | 1.13625982880710  |
| H  | 5.45728219906469  | -1.52069857433169 | 0.20430979967515  | H          | 2.89093227398850  | 6.00042407123019  | 1.51041161975433  |
| H  | 6.35728307478874  | -1.24559948463708 | 3.83295785765692  | H          | 0.87441644873366  | 5.85776508795215  | 2.74486056084452  |
| H  | 5.77996745293076  | 0.42557289215427  | 4.05332254665133  |            |                   |                   |                   |
| H  | 4.60433143336662  | -0.89811445391518 | 3.83279020323555  | <b>EB1</b> |                   |                   |                   |
| Rh | 2.02292224529190  | 3.49122969321713  | 2.07427291073324  | H          | -0.01838514184427 | -0.98725859356865 | 0.45093968065355  |
| C  | 3.93737987923265  | 4.01957041674960  | 2.87877466309984  | C          | -0.87168860327878 | 2.75520983972144  | 0.95089347217810  |
| C  | 4.71564849884176  | 3.12171827415223  | 3.61950110294896  | C          | -1.31668898358777 | 1.89649268284865  | -0.21662927547319 |

|   |                   |                   |                   |            |                   |                   |                   |
|---|-------------------|-------------------|-------------------|------------|-------------------|-------------------|-------------------|
| C | -0.09699865442237 | 1.82859763836975  | -1.09718440885063 | Rh         | 0.96886333714741  | 3.50232676503157  | -0.05407009907902 |
| H | -0.16854342385797 | 1.90707584189299  | -2.18337895905194 | C          | 1.12157940086200  | 4.97339584426286  | 1.39213117410353  |
| C | 1.01805428959194  | 1.30116934468163  | -0.47039669842190 | C          | 0.31915400538482  | 6.11743018989851  | 1.39752360119514  |
| C | 0.74982094959601  | 0.94336419190791  | 0.98139680319901  | C          | 0.41187733523450  | 7.09901083395155  | 2.38775152319636  |
| C | 0.26470503056592  | 2.24315113327934  | 1.57719823459721  | C          | 1.35336566316093  | 6.94637014974527  | 3.40454140279646  |
| H | 0.56645728341927  | 2.55661924744637  | 2.57737981546161  | C          | 2.15558716196304  | 5.81049909371337  | 3.43685789531117  |
| C | -1.62505325542667 | 0.47832467737387  | 0.32392386659758  | C          | 2.04035878998934  | 4.80732054769591  | 2.45548308203747  |
| H | -1.96275254604410 | -0.15541394093891 | -0.50918374778668 | H          | -0.40871544270887 | 6.26357586339790  | 0.59332041006597  |
| H | -2.46834644274371 | 0.56112874492872  | 1.02769733438447  | H          | -0.23436859482312 | 7.97985406748966  | 2.35059536100451  |
| C | -0.38546199267642 | -0.11814127062673 | 1.02574726337124  | H          | 1.46448313590305  | 7.70972836205449  | 4.17963095175829  |
| C | -1.83359720379402 | 3.71151876137750  | 1.56526083947345  | H          | 2.88542815985365  | 5.67569778990059  | 4.24168242218981  |
| H | -2.72185928470053 | 3.14264482012882  | 1.89205634254824  | C          | 4.00043808122578  | 4.69329657332320  | -1.44416270124330 |
| H | -2.17911247691556 | 4.46124629566123  | 0.83791303040464  | C          | 3.10948506334504  | 3.73296400989862  | -2.23529820407183 |
| H | -1.40303233199093 | 4.22465530106079  | 2.43332886064701  | C          | 2.98681051845865  | 5.66960029086294  | -0.84557676886453 |
| C | -0.69319920878556 | -0.60208225606822 | 2.45276444451157  | C          | 1.68619889995275  | 4.06773503505805  | -2.00010603863133 |
| H | -1.16689213635837 | 0.24176374626323  | 2.99010322863320  | C          | 1.61376341413850  | 5.21620082347321  | -1.18820170386978 |
| C | -1.68927152224023 | -1.75807861789944 | 2.41904858073690  | H          | 0.93905562324906  | 3.77017606204153  | -2.73821358268689 |
| H | -2.61869828246214 | -1.4919495323578  | 1.89336457446033  | H          | 0.79368530225686  | 5.93578294288252  | -1.18820343673701 |
| H | -1.96044271668784 | -2.07366657174141 | 3.43849739459682  | O          | 3.52725003101562  | 2.89909352181492  | -3.00821978042867 |
| H | -1.25139580901955 | -2.62926817063637 | 1.90311945785199  | O          | 3.27303841110009  | 6.70615335003828  | -0.28680339877607 |
| C | 0.55858539126839  | -1.0096269902277  | 3.22348785085904  | C          | 4.90357478177214  | 5.44583177495517  | -2.42207122836975 |
| H | 1.13720825266005  | -1.76476417934546 | 2.66435886118198  | H          | 5.59389031709031  | 4.74275252518595  | -2.91084943457920 |
| H | 0.28698804839538  | -1.45177022768991 | 4.19453660731756  | H          | 4.31097860435900  | 5.94896347097166  | -3.20141072474784 |
| H | 1.22434104969084  | -0.15811798548231 | 3.42813215317024  | H          | 5.48726953659300  | 6.20660724870697  | -1.88551877605368 |
| C | 2.14331479385641  | 0.65744248613751  | -1.23480240525024 | C          | 4.81875837360807  | 3.89779868381282  | -0.40652567484811 |
| C | 4.45883041421583  | -0.27632370534217 | -0.90697367554346 | H          | 4.12385967083644  | 3.45035660843421  | 0.31797454158052  |
| O | 1.94966270559632  | 0.19985073874004  | -2.35586598044120 | H          | 5.28341178051475  | 3.06403216315523  | -0.95433243676492 |
| H | 1.65270893610152  | 0.57788342350877  | 1.48156792441626  | C          | 5.88883270202848  | 4.66531959483978  | 0.31844769835254  |
| H | -2.18069298009151 | 2.33131702720202  | -0.73481542247896 | C          | 7.22091433855500  | 4.58101801332938  | -0.10580714360097 |
| N | 3.30626389136698  | 0.56939387819492  | -0.56119443185948 | C          | 5.59249883849179  | 5.47087115194546  | 1.42585007272004  |
| H | 3.32457303308889  | 0.97892623980803  | 0.36453325394816  | C          | 8.23070878420771  | 5.28487239667700  | 0.55041335329060  |
| C | 4.02484578353105  | -1.74494606223387 | -0.88441118200468 | H          | 7.46864768870177  | 3.94739677393146  | -0.96242183299075 |
| C | 5.02877813284691  | 0.09213126681704  | -2.27657394681782 | C          | 6.59895871433619  | 6.17382844227360  | 2.08571751175328  |
| C | 5.50992862351969  | -0.02783982760521 | 0.17260951717112  | H          | 4.56132802982891  | 5.55189708833714  | 1.77314124233053  |
| H | 6.38832106365185  | -0.66446171778697 | -0.00475303603534 | C          | 7.92191222077916  | 6.08601305565698  | 1.64952738257346  |
| H | 5.84001489267804  | 1.02236992395240  | 0.16833372555603  | H          | 9.26407692293410  | 5.20296116661727  | 0.20317092940669  |
| H | 5.11195602847213  | -0.26515403907532 | 1.17233725948137  | H          | 6.34674525875043  | 6.79536784531900  | 2.94909737666562  |
| H | 5.92838645454250  | -0.51043165764497 | -2.47329729871303 | H          | 8.71065317178866  | 6.63714709218406  | 2.16820305668376  |
| H | 4.29293231986479  | -0.09625727573811 | -3.06829691327226 | N          | 2.79131363331927  | 3.64834869710679  | 2.59597818159481  |
| H | 5.29696499241868  | 1.15696975406046  | -2.31360020721368 | H          | 2.86230143568469  | 3.07535270252304  | 1.76370726564938  |
| H | 4.87950267378385  | -2.39910065560933 | -1.11403530750811 | H          | 3.66801546660052  | 3.73382385981124  | 3.09721385764000  |
| H | 3.63571200952828  | -2.01641923362111 | 0.10929529328086  | <b>EB2</b> |                   |                   |                   |
| H | 3.23800386032773  | -1.92690609416644 | -1.63024137036853 | H          | 0.28955097420246  | -0.76797791672489 | 0.45455041201269  |



|   |                   |                   |                   |    |                   |                   |                   |
|---|-------------------|-------------------|-------------------|----|-------------------|-------------------|-------------------|
| C | -0.83734033917109 | 2.89522227756898  | 0.97564470498882  | H  | 3.72282844119419  | -1.83173026707632 | -0.01749716013283 |
| C | -1.19479058229593 | 2.03128828834179  | -0.21704799154721 | H  | 3.38172533902798  | -1.60140851898268 | -1.75587264719986 |
| C | 0.04281309709121  | 2.06574922494322  | -1.07521347695046 | Rh | 0.96543018435817  | 3.78987612427288  | -0.01839706317410 |
| H | -0.01351005817064 | 2.14797906341087  | -2.16234204128084 | C  | 0.83411136639443  | 5.30911226243196  | 1.37553325471675  |
| C | 1.17662705661962  | 1.58926863922718  | -0.43760460145879 | C  | -0.12402346687544 | 6.31981586833051  | 1.27490426824249  |
| C | 0.91164719512297  | 1.20933617059391  | 1.00709299977672  | C  | -0.27852498004812 | 7.30457060304043  | 2.25466164442074  |
| C | 0.32811520864010  | 2.46532935215653  | 1.60440457497728  | C  | 0.56196018209927  | 7.28771385031763  | 3.36704904527947  |
| H | 0.60390186730573  | 2.80224368294430  | 2.60504798137262  | C  | 1.53060384759912  | 6.29605529203650  | 3.48873994832478  |
| C | -1.40950830391191 | 0.58437126669044  | 0.29193536721769  | C  | 1.68396386531196  | 5.30322720381024  | 2.50344809991767  |
| H | -1.67138565816392 | -0.05861832577164 | -0.56125654640621 | H  | -0.77963487124557 | 6.35116978640909  | 0.39846450442514  |
| H | -2.27874934415234 | 0.58869190496941  | 0.96842554161146  | H  | -1.04114139334307 | 8.07952490845769  | 2.14105792931656  |
| C | -0.14940204250433 | 0.07146148842720  | 1.02310574833831  | H  | 0.46987647452677  | 8.05142694145434  | 4.14437986189861  |
| C | -1.88842687687759 | 3.74197369719571  | 1.60416896553938  | H  | 2.19354935764774  | 6.27977052032854  | 4.35967654538858  |
| H | -2.71755454110602 | 3.07809336557712  | 1.90699722181607  | C  | 4.11294458302279  | 4.87755898299695  | -1.14865243155471 |
| H | -2.30134640891014 | 4.47482660079940  | 0.89601209902173  | C  | 3.23857077066682  | 4.00765567727697  | -2.04845209916495 |
| H | -1.51700928727805 | 4.26811711991712  | 2.49129262261699  | C  | 3.10283198354001  | 5.82708194839424  | -0.50470841665669 |
| C | -0.45439617689061 | -0.44013537533434 | 2.44088330481084  | C  | 1.81999633657248  | 4.40040734267254  | -1.88466544042404 |
| H | -0.98644288049402 | 0.37056366971711  | 2.97470478915706  | C  | 1.74745613244108  | 5.51675252465571  | -1.02492854577357 |
| C | -1.37944838110045 | -1.65277083431452 | 2.38289587057690  | H  | 1.10714669448892  | 4.17041187519347  | -2.67989352535642 |
| H | -2.31414099696726 | -1.43681644773577 | 1.84406445197397  | H  | 0.98240054377668  | 6.29283607859255  | -1.06114183479642 |
| H | -1.64760859083828 | -1.99170751661277 | 3.39560060185248  | O  | 3.66815908975148  | 3.20898743241711  | -2.85261949157996 |
| H | -0.88303965724731 | -2.4926337745090  | 1.86800498002238  | O  | 3.40248621153481  | 6.72944531864005  | 0.24744140078189  |
| C | 0.80630964224357  | -0.78020029829296 | 3.22991581043441  | C  | 4.90291740714477  | 4.07246360381987  | -0.12572928957806 |
| H | 1.43425291804231  | -1.49908726182600 | 2.67629436731205  | H  | 5.35217464428485  | 4.75122237930023  | 0.61418400047997  |
| H | 0.54542822907766  | -1.24143553521130 | 4.19493189007592  | H  | 4.26205129911954  | 3.35053138615452  | 0.39857354099421  |
| H | 1.42046440267332  | 0.10599957670050  | 3.44783899420000  | H  | 5.70651759615035  | 3.50740168339679  | -0.61999813798899 |
| C | 2.31209436234042  | 0.96457274844436  | -1.20257803972243 | C  | 5.08626722801454  | 5.70247563666864  | -2.02645981261483 |
| C | 4.60010806319553  | -0.03053315302138 | -0.86789671378619 | H  | 5.70286889874936  | 6.30802432094307  | -1.34453086011187 |
| O | 2.14424026831058  | 0.56928327879731  | -2.35108265693376 | H  | 5.74983391038921  | 4.98307190659855  | -2.53070402798495 |
| H | 1.82543716348381  | 0.90250566360355  | 1.52555936785659  | C  | 4.41556940942005  | 6.58914196538366  | -3.04212460195100 |
| H | -2.07849363423498 | 2.41249695981077  | -0.74413329728043 | C  | 4.09329466028176  | 6.10630349709673  | -4.31787771736971 |
| N | 3.44948627809765  | 0.80689749453979  | -0.49856968563932 | C  | 4.06974202192271  | 7.90937838213547  | -2.72346227037643 |
| H | 3.44744371121174  | 1.15907306649560  | 0.45077398588241  | C  | 3.43491440020320  | 6.91462281571490  | -5.24388458968749 |
| C | 4.14653084075042  | -1.48936240826679 | -0.97450508813328 | H  | 4.36295987370390  | 5.08170589582754  | -4.58569782337199 |
| C | 5.22351318755029  | 0.43605329469795  | -2.18321359951007 | C  | 3.41187100772059  | 8.72043102794844  | -3.64744326800552 |
| C | 5.61495395764516  | 0.11591143077191  | 0.26346817681927  | H  | 4.31973640182722  | 8.30321361652786  | -1.73516929410829 |
| H | 6.49239266687374  | -0.51607483777449 | 0.06592057252271  | C  | 3.08896086358148  | 8.22451764083976  | -4.91078080193217 |
| H | 5.95489849216708  | 1.15890443534437  | 0.35353672394411  | H  | 3.19489565405423  | 6.51941900971170  | -6.23452680299692 |
| H | 5.17906162560861  | -0.19489491730802 | 1.22654212466976  | H  | 3.15382091374907  | 9.74845654972440  | -3.37975350760884 |
| H | 6.11732459409566  | -0.16791395976017 | -2.40136057989690 | H  | 2.57525452750168  | 8.85980350096362  | -5.63694127023910 |
| H | 4.51018376809019  | 0.33117058439805  | -3.01008609321579 | N  | 2.63016014983565  | 4.30391451890152  | 2.68499213106988  |
| H | 5.51361503706865  | 1.49410955010570  | -2.12254010511618 | H  | 2.87201481099014  | 3.80227017879988  | 1.83690423638120  |
| H | 5.00012687981642  | -2.13616669786042 | -1.22770767437050 | H  | 3.44635688190262  | 4.56497475494774  | 3.22739172994953  |

|            |                   |                   |                   |    |                   |                   |                   |
|------------|-------------------|-------------------|-------------------|----|-------------------|-------------------|-------------------|
|            |                   |                   |                   | H  | 4.91570809657601  | 0.44365125078077  | 3.01108587811534  |
| <b>EB3</b> |                   |                   |                   | H  | 4.18494612026581  | 1.45306903381700  | 4.29208047063406  |
| H          | -0.51849150701179 | -0.89277075985813 | 0.39028446752327  | H  | 4.23654951589054  | -2.31677332108224 | 4.34705689245369  |
| C          | -0.41019793518155 | 2.97354375535808  | 0.11148020204595  | H  | 2.63067128118032  | -2.52014980668893 | 3.59395401849884  |
| C          | 0.17254896175997  | 1.98508617024943  | -0.88714675155200 | H  | 4.00700560494766  | -1.93514584385560 | 2.61684637458101  |
| C          | 1.46314850787217  | 1.53635111710475  | -0.25730915456688 | Rh | 1.41271964039810  | 3.18660020909753  | 1.39225647404524  |
| H          | 2.40543742220194  | 1.46694952693326  | -0.80259049864231 | C  | 0.68994647762719  | 4.30755527971434  | 2.93602107321377  |
| C          | 1.29737467162281  | 0.98218585887905  | 0.99422893592261  | C  | 0.88149883287689  | 3.59059613073415  | 4.12088480251541  |
| C          | -0.15740036939382 | 0.94532443345274  | 1.43352432985740  | C  | 0.40554083873174  | 4.04337869527661  | 5.35605934226802  |
| C          | -0.58329093563839 | 2.39902132123272  | 1.37223842148043  | C  | -0.27437537683632 | 5.25918964887688  | 5.40615590230766  |
| H          | -1.25505203256870 | 2.82549275365401  | 2.11870047118504  | C  | -0.44434641781091 | 6.00524339444376  | 4.24394915556645  |
| C          | -0.79148418574521 | 0.77707072300193  | -0.98083110283298 | C  | 0.04068519621727  | 5.55923160724445  | 2.99772478981149  |
| H          | -0.39895164387201 | 0.06614382271121  | -1.72229935282201 | H  | 1.41777185224421  | 2.63485809092307  | 4.09071271307737  |
| H          | -1.7562969506026  | 1.14318469835089  | -1.36601256472211 | H  | 0.56719122310437  | 3.44846666549867  | 6.25863549697935  |
| C          | -0.9694937296849  | 0.11556245088452  | 0.40072727796196  | H  | -0.66203315722538 | 5.64047580606952  | 6.35492780281287  |
| C          | -1.10929872153116 | 4.18687921420345  | -0.39298459680486 | H  | -0.95552208341669 | 6.97261242474240  | 4.28599172888788  |
| H          | -2.01213048142923 | 3.87065785044542  | -0.94533208716654 | C  | 3.60724294207731  | 4.60771742555055  | -0.79319123596630 |
| H          | -0.47465790679313 | 4.73765945207789  | -1.10241044958305 | C  | 2.75852954959460  | 5.36932576891062  | 0.21302895455421  |
| H          | -1.39581556041125 | 4.86548986838990  | 0.41996615492202  | C  | 4.02351089540246  | 3.35690637175804  | -0.00811716438025 |
| C          | -2.44885814005292 | -0.03807125697436 | 0.79137242970678  | C  | 2.88352250831191  | 4.71742981350762  | 1.53917585592601  |
| H          | -2.91805229950957 | 0.95958036561070  | 0.69414450352971  | C  | 3.55415557997206  | 3.48118884722823  | 1.38696073351674  |
| C          | -3.15514283761222 | -0.98693719526115 | -0.17337879528626 | H  | 2.83157332476841  | 5.30606564169716  | 2.45512729267771  |
| H          | -3.06256039347450 | -0.66081994804206 | -1.22011410838138 | H  | 4.03520152615088  | 2.91635594600084  | 2.18962784639455  |
| H          | -4.22851648707644 | -1.05788724105138 | 0.06112584853109  | O  | 2.13798311917087  | 6.39003161735972  | -0.02993734041103 |
| H          | -2.72742650142381 | -2.00098570560891 | -0.09948299943624 | O  | 4.71123390725251  | 2.47313508332508  | -0.47787520862404 |
| C          | -2.64153156559669 | -0.51270115828044 | 2.22810709223380  | C  | 4.88540034757064  | 5.42153967594106  | -1.04166146553729 |
| H          | -2.09263768721530 | -1.45205173591222 | 2.41100892919139  | H  | 4.64115899474149  | 6.38245976409881  | -1.51524044475898 |
| H          | -3.70647403887487 | -0.70676641453258 | 2.42868751173265  | H  | 5.41628127826334  | 5.62320050001977  | -0.09849919221855 |
| H          | -2.30115693549645 | 0.22707383685198  | 2.96786417840289  | H  | 5.55818805075661  | 4.85783273796565  | -1.70455187985370 |
| C          | 2.41559993414343  | 0.27161620011244  | 1.70629933232626  | C  | 2.88830348879517  | 4.22677451950290  | -2.09917884720599 |
| C          | 3.18829709902249  | -0.45487400344851 | 3.98295811927744  | H  | 3.47963747339914  | 3.41140823611498  | -2.54563343325946 |
| O          | 3.42365262703088  | -0.08214453617036 | 1.10649612108699  | H  | 1.90545117238463  | 3.81169364302424  | -1.83815078107177 |
| H          | -0.27776924280798 | 0.53505802955681  | 2.44107789880662  | C  | 2.71317662845549  | 5.32371490089649  | -3.11399936049604 |
| H          | 0.32261739144983  | 2.44393463923702  | -1.87188117736308 | C  | 1.58543153666737  | 6.15428733699009  | -3.10108496107934 |
| N          | 2.21720815529428  | 0.09390680387719  | 3.02724015970860  | C  | 3.67611630975718  | 5.52965263040490  | -4.11043798583474 |
| H          | 1.34445568572885  | 0.42591986607108  | 3.41833037351314  | C  | 1.42949628694092  | 7.16673082429947  | -4.04644158442189 |
| C          | 3.53759752543870  | -1.89629444024801 | 3.60851087059438  | H  | 0.82285779382347  | 6.00802738014458  | -2.33357585319816 |
| C          | 4.44255413418709  | 0.42247878067906  | 4.00215603919263  | C  | 3.52685278763565  | 6.54343916648898  | -5.05689911007876 |
| C          | 2.50971230522477  | -0.42074659793642 | 5.34995141521075  | H  | 4.55549632379573  | 4.88029241977328  | -4.14694621593257 |
| H          | 3.19089396399696  | -0.81401815731552 | 6.11781371251308  | C  | 2.40236275500223  | 7.36812436271361  | -5.02684262226446 |
| H          | 2.23755413892037  | 0.61009034733362  | 5.62865718585656  | H  | 0.53970868676630  | 7.80139651989206  | -4.01915936290011 |
| H          | 1.59634217426521  | -1.03634284895440 | 5.35222052238382  | H  | 4.29095611978582  | 6.68532600456174  | -5.82578667198630 |
| H          | 5.16802951408459  | 0.02948200587443  | 4.73006098274270  | H  | 2.28042861791279  | 8.16121958496515  | -5.76918709967313 |

|            |                   |                   |                   |    |                   |                   |                   |
|------------|-------------------|-------------------|-------------------|----|-------------------|-------------------|-------------------|
| N          | -0.15965479913790 | 6.33382472547209  | 1.86770500438952  | H  | 2.57468071833668  | 0.61647617584232  | 5.50012099704458  |
| H          | -0.39441271986549 | 7.30027036793447  | 2.06784196818141  | H  | 1.96132542254515  | -1.03562823497802 | 5.19436948133237  |
| H          | 0.57898337549583  | 6.27794857768973  | 1.16613430691217  | H  | 5.42870399800858  | 0.18827287930912  | 4.31193709334554  |
|            |                   |                   |                   | H  | 5.00203600958562  | 0.69180741665639  | 2.65204887409747  |
| <b>EB4</b> |                   |                   |                   | H  | 4.36135112529867  | 1.59481378632183  | 4.05474561090020  |
| H          | -0.50025533881178 | -0.86650671800380 | 0.34872122981316  | H  | 4.54722177718637  | -2.16435351380125 | 3.89755250619686  |
| C          | -0.75575703384944 | 3.00285220361826  | 0.35486422131881  | H  | 2.88741777805521  | -2.39550842605387 | 3.28272559980176  |
| C          | -0.15379133526722 | 2.14465907713512  | -0.74620449184967 | H  | 4.14719818101391  | -1.71306511806365 | 2.21583035409010  |
| C          | 1.20999498687688  | 1.77324715224594  | -0.23324561511227 | Rh | 1.11837712963691  | 3.29727001874248  | 1.54397232563218  |
| H          | 2.11398116385904  | 1.83028470252879  | -0.84105323397790 | C  | 0.40681850611982  | 4.25101457515172  | 3.19638550383243  |
| C          | 1.17998230626982  | 1.12331186820897  | 0.98122417185517  | C  | 0.75517175537567  | 3.49110979984423  | 4.31678279889443  |
| C          | -0.23375965982878 | 0.92199013039930  | 1.50589951667952  | C  | 0.32259224681023  | 3.81645724416981  | 5.60678840853987  |
| C          | -0.79524938135112 | 2.33004686707531  | 1.57752929225615  | C  | -0.47178401782829 | 4.94865776426254  | 5.77954782028952  |
| H          | -1.45487014850600 | 2.63611152251343  | 2.39107418504267  | C  | -0.79620103513518 | 5.74093742651265  | 4.68236814160483  |
| C          | -1.01213379569228 | 0.86241717217396  | -0.87231933141401 | C  | -0.35616770663165 | 5.42340960151577  | 3.38103379889351  |
| H          | -0.61136861826783 | 0.24534683030282  | -1.68956890943793 | H  | 1.38565946080426  | 2.60333451868288  | 4.18883043689184  |
| H          | -2.02924031656465 | 1.16587747091214  | -1.16648478458802 | H  | 0.60712225342326  | 3.19055659119327  | 6.45639239978587  |
| C          | -1.03657707105545 | 0.09240243669902  | 0.46320523889956  | H  | -0.82882425796782 | 5.23028272493540  | 6.77402924277286  |
| C          | -1.58687131284526 | 4.17815709264184  | -0.02545104195666 | H  | -1.39670976576495 | 6.64610262110592  | 4.82026331869740  |
| H          | -2.47599504855115 | 3.81720172915530  | -0.57266737657207 | C  | 3.02907735853733  | 5.00508074894751  | -0.66854266627470 |
| H          | -1.03617950820376 | 4.84317431031492  | -0.70737893902795 | C  | 2.14754662038075  | 5.62235470009789  | 0.40481489790342  |
| H          | -1.90604284613106 | 4.75909722763926  | 0.84852771281096  | C  | 3.60841180263401  | 3.77335549537069  | 0.03328800871731  |
| C          | -2.46700741204464 | -0.22425000950260 | 0.93096168066375  | C  | 2.43394812549644  | 4.95856909155483  | 1.69642170202335  |
| H          | -3.02377929724482 | 0.73212539160486  | 0.94639924882333  | C  | 3.21667209348856  | 3.80331560059948  | 1.45613385289532  |
| C          | -3.15747915222855 | -1.15467357190969 | -0.06299369651378 | H  | 2.37652465425782  | 5.50919571002065  | 2.63496963458041  |
| H          | -3.16993937789692 | -0.73992389255279 | -1.08199256104587 | H  | 3.79842021222503  | 3.26235794015818  | 2.20691565528531  |
| H          | -4.20089660985937 | -1.34167444712123 | 0.23457112835012  | O  | 1.38391620247294  | 6.55580874414921  | 0.21499726279717  |
| H          | -2.64065812528496 | -2.12824326238472 | -0.10414446836870 | O  | 4.35011859334938  | 2.97914377500166  | -0.51099627396510 |
| C          | -2.51727793028719 | -0.82338928067153 | 2.33270350771028  | C  | 2.29927129057379  | 4.70195668246987  | -1.96454352494102 |
| H          | -1.88103811322059 | -1.72201561895449 | 2.40007697797985  | H  | 2.96464312145108  | 4.16015844815886  | -2.65255972053226 |
| H          | -3.54552697745195 | -1.12476876454181 | 2.58540365549168  | H  | 1.40485205670095  | 4.09205293866241  | -1.78705859420965 |
| H          | -2.18600139499928 | -0.11563517414174 | 3.10699972426499  | H  | 1.98293555480616  | 5.63837456558319  | -2.44652010551326 |
| C          | 2.40056092120029  | 0.46232873481354  | 1.56155041624973  | C  | 4.20550185015865  | 5.98286928944825  | -0.95799633535380 |
| C          | 3.4055774332734   | -0.33018320171739 | 3.72325755136004  | H  | 4.84761246165487  | 5.48518581681602  | -1.70106993797535 |
| O          | 3.36785464814656  | 0.19279280031923  | 0.85961110787306  | H  | 3.77275350743934  | 6.87782700668751  | -1.43144885290090 |
| H          | -0.24661702535703 | 0.43174084980535  | 2.48484445814044  | C  | 5.01352960540733  | 6.36878259937774  | 0.25075016695838  |
| H          | -0.11299117712154 | 2.68250614821247  | -1.70108509015299 | C  | 4.64262211652251  | 7.46324836840487  | 1.04320713017774  |
| N          | 2.33309034871596  | 0.22310685098974  | 2.88589831899195  | C  | 6.12596783811468  | 5.61090393648464  | 0.63846011408168  |
| H          | 1.48296757026275  | 0.49252325782397  | 3.36506874939656  | C  | 5.35540803312626  | 7.78385358658366  | 2.19807477322331  |
| C          | 3.76948132652655  | -1.73770016638309 | 3.24651820292808  | H  | 3.78202980157376  | 8.07168390331829  | 0.75147109957260  |
| C          | 4.62517420285954  | 0.59391460057986  | 3.67911871195816  | C  | 6.84057374628064  | 5.92827163869624  | 1.79313566744553  |
| C          | 2.85166198128716  | -0.38900802464158 | 5.14462089054095  | H  | 6.43110283678627  | 4.75731533785762  | 0.02761942785219  |
| H          | 3.61065107998265  | -0.79597999822082 | 5.82767463581136  | C  | 6.45491050857915  | 7.01398391233295  | 2.57959204349470  |

|            |                   |                   |                   |    |                   |                   |                   |
|------------|-------------------|-------------------|-------------------|----|-------------------|-------------------|-------------------|
| H          | 5.05222256086313  | 8.64294551285131  | 2.80225733840876  | C  | 4.67385260527609  | 0.39450793048057  | -3.05449469284387 |
| H          | 7.70635647718020  | 5.32480734390872  | 2.07821972192506  | C  | 5.30016007557696  | -0.55151588376292 | -0.82917441280548 |
| H          | 7.01462068032766  | 7.26439656822021  | 3.48443618810072  | H  | 6.00817039585606  | -1.24733217473893 | -1.30125532098368 |
| N          | -0.70444484086370 | 6.24120491975509  | 2.32094528200587  | H  | 5.84317676979686  | 0.37278974002322  | -0.57472083277174 |
| H          | -1.01268660320056 | 7.16765103095061  | 2.59566748022591  | H  | 4.93683925587066  | -1.01205659566122 | 0.10372783659929  |
| H          | -0.02506266858884 | 6.28954792921614  | 1.56099231167314  | H  | 5.37310166997082  | -0.29425876013643 | -3.55238144892881 |
| <b>EBS</b> |                   |                   |                   |    |                   |                   |                   |
| H          | 0.58014545891285  | -0.64508298034762 | 0.60410965526890  | H  | 5.20003464131311  | 1.33097735930170  | -2.82276372715542 |
| C          | -0.48051669822671 | 2.98357774887621  | 1.44304519862477  | H  | 4.05703468431924  | -2.25131815281762 | -2.63460657726058 |
| C          | -1.07783287513520 | 2.13705941576661  | 0.33677282456547  | H  | 3.03340471653290  | -2.03398513309702 | -1.18751835486127 |
| C          | -0.06161699624855 | 2.23636799584614  | -0.76884759621790 | H  | 2.52741407935467  | -1.34023215416049 | -2.75473699730308 |
| H          | -0.35659341671742 | 2.34417579319042  | -1.81469591727597 | Rh | 1.04170284814309  | 3.93342396427567  | 0.09256477788164  |
| C          | 1.19302001836013  | 1.74756279515835  | -0.42484452652638 | C  | 0.91856213625263  | 5.50637438194194  | 1.41741878072841  |
| C          | 1.26620485641390  | 1.33808821725208  | 1.03461573469739  | C  | 1.79907564779854  | 5.58276819975716  | 2.49643949986542  |
| C          | 0.80909151734983  | 2.57266794459747  | 1.77298648828018  | C  | 1.68878345895057  | 6.57337789128953  | 3.47902161874357  |
| H          | 1.29448541709252  | 2.89678525069729  | 2.69641841953976  | C  | 0.66569860333509  | 7.51396611405459  | 3.37889405550028  |
| C          | -1.14179016044629 | 0.67086711467876  | 0.83107255323013  | C  | -0.22930730125914 | 7.45614866560765  | 2.31266451342115  |
| H          | -1.56046143868746 | 0.04226181523083  | 0.03141416936990  | C  | -0.11728447399149 | 6.46240096263451  | 1.32570753875635  |
| H          | -1.84848518444408 | 0.63017902402397  | 1.67479875733987  | H  | 2.60265042933095  | 4.84677023411356  | 2.59069483823633  |
| C          | 0.25638293272042  | 0.17791853198331  | 1.26660394403924  | H  | 2.39770705431151  | 6.60237628267038  | 4.31073438552713  |
| C          | -1.38670872240672 | 3.75753165095391  | 2.34017325822656  | H  | 0.55512396502383  | 8.29631928862541  | 4.13488201497990  |
| H          | -2.06729001493512 | 3.03667107375331  | 2.82646210908570  | H  | -1.03895847623306 | 8.18880860591444  | 2.23516446929229  |
| H          | -2.01092540208450 | 4.46708957288011  | 1.77977815831398  | C  | 4.07117443950366  | 4.86170395110213  | -1.00501671614933 |
| H          | -0.83585695039761 | 4.29733803834361  | 3.11973080789734  | C  | 3.19821285288018  | 4.11671775278037  | -2.01757829767257 |
| C          | 0.27311973043460  | -0.35550628349899 | 2.70885697507935  | C  | 3.12307143223114  | 5.97231056409745  | -0.54950433555027 |
| H          | -0.15704558405858 | 0.43311913017718  | 3.35557088546224  | C  | 1.77934525209859  | 4.50880104138230  | -1.83416424643392 |
| C          | -0.60653453313064 | -1.59724524636987 | 2.82851433644422  | C  | 1.74709766775295  | 5.65216140083170  | -1.00820299329777 |
| H          | -1.64034029509162 | -1.40910915508422 | 2.50213205113659  | H  | 1.04405540412698  | 4.26136970101258  | -2.60344024063582 |
| H          | -0.64444408336148 | -1.95376231104374 | 3.86955426310784  | H  | 0.97572043888837  | 6.42409505066458  | -1.02929101398416 |
| H          | -0.20362839168386 | -2.41553934145859 | 2.20804658413578  | O  | 3.63576237392379  | 3.40390523932666  | -2.89221408459275 |
| C          | 1.68110010216065  | -0.66268021086853 | 3.20894038026100  | O  | 3.45600471094092  | 6.98944741238358  | 0.01978861710298  |
| H          | 2.19907783757205  | -1.35526408383081 | 2.52367948171833  | C  | 5.31069739434514  | 5.43167246216535  | -1.67979081784449 |
| H          | 1.64296909839842  | -1.14163210923404 | 4.19949373031755  | H  | 5.95922608995588  | 4.61564824266005  | -2.03008966586846 |
| H          | 2.30117185862584  | 0.24064275873216  | 3.30773112201953  | H  | 5.03871841218545  | 6.05414209177158  | -2.54540213803691 |
| C          | 2.06894887472818  | 1.14737106944846  | -1.48949427144920 | H  | 5.87556464764118  | 6.05156474832064  | -0.97040353046466 |
| C          | 4.14101632172755  | -0.25584148535104 | -1.77872738365792 | C  | 4.43156159708382  | 3.86602311943662  | 0.13160544060045  |
| O          | 1.67245811109496  | 1.05994063218378  | -2.64741693027784 | H  | 3.52305713783013  | 3.68121006223931  | 0.73595269503915  |
| H          | 2.27723760703407  | 1.05221549747991  | 1.34333577537220  | H  | 4.67857612664014  | 2.90940337465607  | -0.35242202225161 |
| H          | -2.06477516683749 | 2.50710353804296  | 0.03127809345145  | C  | 5.58432198735474  | 4.26381972317643  | 1.01170909659915  |
| N          | 3.24318545665551  | 0.65227405054951  | -1.05093893279236 | C  | 6.79562119258614  | 3.56749165304590  | 0.91472195455044  |
| H          | 3.45053390275607  | 0.77582589160818  | -0.06855400328763 | C  | 5.49452688836811  | 5.31664824254581  | 1.93311258642377  |
| C          | 3.39180304434666  | -1.54953028241057 | -2.10918809019244 | C  | 7.88902213169648  | 3.90847605027531  | 1.71128006968427  |
|            |                   |                   |                   | H  | 6.88000129986322  | 2.74132242421422  | 0.20212996551478  |

|            |                   |                   |                   |    |                   |                   |                   |
|------------|-------------------|-------------------|-------------------|----|-------------------|-------------------|-------------------|
| C          | 6.58567281052178  | 5.66124072348360  | 2.72910311087549  | N  | 3.24831192328506  | 0.60707330514338  | -0.99807354920717 |
| H          | 4.56609398675220  | 5.88345541041859  | 2.01822902818425  | H  | 3.47484654104929  | 0.80672291108630  | -0.03240258285093 |
| C          | 7.78751825678219  | 4.95918982390386  | 2.62216480266630  | C  | 3.34168162343177  | -1.63709191879490 | -1.97089715957204 |
| H          | 8.82401395759718  | 3.34966644903405  | 1.61846895978021  | C  | 4.70139018617835  | 0.22808123901043  | -2.96565070683726 |
| H          | 6.49551156873604  | 6.48610458329286  | 3.44104564942992  | C  | 5.25958379318797  | -0.65587462272215 | -0.69639095173308 |
| H          | 8.64136691077686  | 5.23035531016756  | 3.24841935229723  | H  | 5.95523991436458  | -1.38621514640422 | -1.13353446019554 |
| N          | -0.99502817109464 | 6.45347843620383  | 0.24868740881760  | H  | 5.82532224628794  | 0.25965168645920  | -0.46131883418592 |
| H          | -1.12419219363072 | 5.54268657525760  | -0.18264187563205 | H  | 4.86645175822754  | -1.07629283512972 | 0.24325590511695  |
| H          | -1.87354472436983 | 6.93807332634090  | 0.39548065001541  | H  | 5.37645427287445  | -0.50464967408541 | -3.43339740500965 |
|            |                   |                   |                   | H  | 3.89718841633793  | 0.47536370121724  | -3.66980714085309 |
| <b>EB6</b> |                   |                   |                   | H  | 5.26320544656684  | 1.14869483960122  | -2.75624750081895 |
| H          | 0.53767946430695  | -0.62026101508416 | 0.62636309825993  | H  | 3.99363513550121  | -2.37947444667098 | -2.45557080504040 |
| C          | -0.48523595874917 | 3.03542016046442  | 1.38378037492351  | H  | 2.95150705204683  | -2.07312766132656 | -1.03799371836954 |
| C          | -1.07494041558715 | 2.17987991074298  | 0.28039819033733  | H  | 2.49602285494351  | -1.42675141208690 | -2.64017100431757 |
| C          | -0.03831868483575 | 2.24417866406221  | -0.80876346548264 | Rh | 1.07227010911908  | 3.94235781508230  | 0.03908262483750  |
| H          | -0.31457157631760 | 2.33336582906320  | -1.86148113221802 | C  | 0.94137778030150  | 5.53650230887353  | 1.33381402993177  |
| C          | 1.20281362825705  | 1.74414209639698  | -0.43351727121098 | C  | 1.81316527711277  | 5.62850716708368  | 2.41900958236000  |
| C          | 1.24450734575527  | 1.36043005108379  | 1.03393001561495  | C  | 1.68601467763035  | 6.62997685920188  | 3.38827095108752  |
| C          | 0.79311552935151  | 2.61412530339459  | 1.74225232492102  | C  | 0.66194031845638  | 7.56688833163008  | 3.26396585304764  |
| H          | 1.26871285364183  | 2.94981825452921  | 2.66670833601506  | C  | -0.21761673325714 | 7.49749727361460  | 2.18569381393153  |
| C          | -1.16940927200643 | 0.72325752431859  | 0.79737453113427  | C  | -0.09193828768546 | 6.49122688654254  | 1.21346019592928  |
| H          | -1.58184656674972 | 0.08718259622316  | 0.00038666697812  | H  | 2.62490347616259  | 4.90203241551639  | 2.52339834112771  |
| H          | -1.89218586833191 | 0.70629434120520  | 1.62812895624872  | H  | 2.38387904864582  | 6.67283962979189  | 4.22864280987576  |
| C          | 0.21328394879065  | 0.21919311887788  | 1.26755696458464  | H  | 0.54033334112032  | 8.35759965325667  | 4.00954839176679  |
| C          | -1.39632457546399 | 3.83139524515230  | 2.25653253152139  | H  | -1.02525083851338 | 8.22994914022347  | 2.08764072049933  |
| H          | -2.08892168385264 | 3.12324016582100  | 2.74458094872699  | C  | 4.13042055958733  | 4.84994036615080  | -0.97722919791375 |
| H          | -2.00775808252953 | 4.53778624138863  | 1.67835941334522  | C  | 3.29879525899927  | 4.03239962458031  | -1.96389270300059 |
| H          | -0.85116648840839 | 4.37786657621503  | 3.03549689678911  | C  | 3.15397792872849  | 5.95479309299180  | -0.57177798168774 |
| C          | 0.19550998294187  | -0.28920085021124 | 2.71893317028476  | C  | 1.87776163322421  | 4.45426449196981  | -1.87683883235158 |
| H          | -0.23363627860259 | 0.51686276152020  | 3.34454716669117  | C  | 1.80813587836525  | 5.62931157185741  | -1.09884757046537 |
| C          | -0.70591505399784 | -1.51477934410064 | 2.84370311704343  | H  | 1.17718872224884  | 4.17153059309017  | -2.66598217566923 |
| H          | -1.73069875034910 | -1.31575871123149 | 2.49600853726337  | H  | 1.03460189561391  | 6.39619414421713  | -1.17192896452932 |
| H          | -0.76774726449579 | -1.85284447346672 | 3.88975780285311  | O  | 3.75889923186604  | 3.23534492834698  | -2.75060987179841 |
| H          | -0.30556144572761 | -2.34987726910429 | 2.24433075341727  | O  | 3.46154358335252  | 6.95281017197285  | 0.04400797497732  |
| C          | 1.58936919021553  | -0.60950211075840 | 3.24955256721786  | C  | 4.51699122966790  | 3.99546251545220  | 0.23228417096058  |
| H          | 2.10841375071725  | -1.32163767866260 | 2.58542622050907  | H  | 5.00880119345489  | 4.62114264968245  | 0.99211059843918  |
| H          | 1.52633998962058  | -1.07055231556526 | 4.24731432528078  | H  | 3.62710425514327  | 3.52802339948453  | 0.68758416228928  |
| H          | 2.22154232799944  | 0.28588100770147  | 3.34368673813403  | H  | 5.20822906520981  | 3.19600705233037  | -0.07426807506098 |
| C          | 2.08325071065883  | 1.09488965311020  | -1.46550444779173 | C  | 5.39105367836530  | 5.43190635982779  | -1.64201339639548 |
| C          | 4.12722610945349  | -0.35618971423747 | -1.67605995444749 | H  | 5.91523470124037  | 6.02576834797645  | -0.87738273434159 |
| O          | 1.69016309854862  | 0.95479584085101  | -2.61993131019942 | H  | 6.04259392160406  | 4.58522815529955  | -1.90695127592919 |
| H          | 2.24529313919862  | 1.06246521600929  | 1.36290198179749  | C  | 5.13103975169376  | 6.27991349889988  | -2.85988247931326 |
| H          | -2.05071579250281 | 2.55898310006348  | -0.04909759173681 | C  | 5.11597827870277  | 5.71291576628314  | -4.14167980045586 |

|            |                   |                   |                   |    |                   |                   |                   |
|------------|-------------------|-------------------|-------------------|----|-------------------|-------------------|-------------------|
| C          | 4.88581989303674  | 7.65502587469462  | -2.74017468767169 | O  | 3.65016165331654  | 0.07425843986241  | 0.84756864700290  |
| C          | 4.85140963012019  | 6.49156847250031  | -5.26776844108338 | H  | 0.15878665783418  | 0.52719380045674  | 2.59566222332864  |
| H          | 5.31042988938491  | 4.64372716788928  | -4.25288040266486 | H  | 0.09508265618128  | 2.41563760112998  | -1.77452464528748 |
| C          | 4.62059856323085  | 8.43661319583493  | -3.86415046733463 | N  | 2.72806889289125  | 0.36858419398712  | 2.91023965102320  |
| H          | 4.90294739123766  | 8.11572705990315  | -1.74972411898511 | H  | 1.93627003347718  | 0.77526628637327  | 3.39677100117807  |
| C          | 4.59869123435433  | 7.85696549167350  | -5.13299409128982 | C  | 4.07096631726441  | -1.62903190980852 | 3.39826826172839  |
| H          | 4.84634688657882  | 6.02823538273992  | -6.25800183226811 | C  | 5.07552633474424  | 0.67588433611058  | 3.56453290574847  |
| H          | 4.43460921935457  | 9.50763300361591  | -3.74735945276318 | C  | 3.32398983303383  | -0.05704483419060 | 5.19412558535794  |
| H          | 4.39189584649493  | 8.46877109532071  | -6.01492424923652 | H  | 4.09078840203270  | -0.44717495877958 | 5.87831973134964  |
| N          | -0.95344777071745 | 6.46730705490592  | 0.12280196867967  | H  | 3.12342121795619  | 0.99102570279270  | 5.46719111341875  |
| H          | -1.07646069986120 | 5.54849545184013  | -0.29340675160010 | H  | 2.40135038633216  | -0.63989665421219 | 5.34198456656046  |
| H          | -1.83593497460800 | 6.94956709678137  | 0.25359110113754  | H  | 5.88049946116889  | 0.29499393904775  | 4.21070694242155  |
| <b>EB7</b> |                   |                   |                   |    |                   |                   |                   |
| H          | -0.18351747371401 | -0.95244163294447 | 0.60342401546041  | H  | 4.86276448616685  | -2.03394335577080 | 4.04622989516797  |
| C          | -0.47531995601776 | 2.89267732655001  | 0.27274177612711  | H  | 3.15969776302182  | -2.22796364463465 | 3.54876230044214  |
| C          | 0.09131939651114  | 1.95410373625431  | -0.77902203699276 | H  | 4.38787597457982  | -1.72766555983341 | 2.35163367874902  |
| C          | 1.48368351691963  | 1.65833411400521  | -0.28460252523962 | Rh | 1.51125408202099  | 3.29339192921576  | 1.25831132683606  |
| H          | 2.35097693608780  | 1.64962011102117  | -0.94648782346847 | C  | 0.71698928617949  | 4.72073794561272  | 2.50697034818735  |
| C          | 1.50802910439482  | 1.10526856276507  | 0.98659209287101  | C  | 0.09990636188786  | 5.89842825130294  | 2.09316459260092  |
| C          | 0.12337797585031  | 0.93103954176277  | 1.57936819501694  | C  | -0.56133224377250 | 6.74655366942725  | 2.98997905443990  |
| C          | -0.42629579120028 | 2.33973920152510  | 1.55033114261324  | C  | -0.58906915753109 | 6.41555339857566  | 4.34221081861695  |
| H          | -1.01128755610331 | 2.74490082163320  | 2.37797093328554  | C  | 0.05013270762824  | 5.25896965957089  | 4.78613931609373  |
| C          | -0.74622471994350 | 0.65416641177366  | -0.75639736042187 | C  | 0.71295606666933  | 4.40859495951381  | 3.88698797095438  |
| H          | -0.35934832317187 | -0.03370418409016 | -1.52247674169561 | H  | 0.12718570385773  | 6.17510406161960  | 1.03776713239506  |
| H          | -1.77794129814616 | 0.90971480838980  | -1.04554323085530 | H  | -1.04414354897898 | 7.65802953216541  | 2.62785757186202  |
| C          | -0.71639627456688 | 0.01410389360551  | 0.64809404990862  | H  | -1.09766988825789 | 7.06217131208993  | 5.06257703716678  |
| C          | -1.36023437658701 | 4.01458544609793  | -0.14484007025675 | H  | 0.04793966666691  | 5.00335403972932  | 5.85072366410274  |
| H          | -2.21041720592886 | 3.58834359455807  | -0.70580308017129 | C  | 3.49893417134082  | 5.10594218847710  | -0.73912469236075 |
| H          | -0.84520209219769 | 4.70840197613326  | -0.82527968498967 | C  | 3.07579190182272  | 5.68316562282968  | 0.61098934155654  |
| H          | -1.75465197952276 | 4.57207854879540  | 0.71301140679272  | C  | 3.88278798127091  | 3.66839200053348  | -0.38728121676187 |
| C          | -2.12667090150584 | -0.25648868487653 | 1.19980780909951  | C  | 3.15841396112543  | 4.61924606539442  | 1.64263174722405  |
| H          | -2.68852957937369 | 0.69485595274928  | 1.13671892936525  | C  | 3.63047773599557  | 3.42808324727119  | 1.05142245996389  |
| C          | -2.84743325105070 | -1.28813532008493 | 0.33637920819693  | H  | 3.26172763581527  | 4.88931183138833  | 2.69447148684295  |
| H          | -2.89428357801230 | -0.98648622307391 | -0.72071642441609 | H  | 4.14047987474588  | 2.61859589790000  | 1.57661916936985  |
| H          | -3.87987220611842 | -1.44136554856423 | 0.68673219173475  | O  | 2.81468824979628  | 6.85024387719446  | 0.81443265070141  |
| H          | -2.32921025750035 | -2.26072726740914 | 0.38429518810969  | O  | 4.36529021627256  | 2.88410297005471  | -1.17954400688584 |
| C          | -2.11951741250907 | -0.70598751267676 | 2.65763090076009  | C  | 4.74514075183647  | 5.84584942254259  | -1.22761052074056 |
| H          | -1.46275342033756 | -1.58150786015974 | 2.79601708971076  | H  | 4.51353787088932  | 6.90671424437545  | -1.39479271604425 |
| H          | -3.13243685137618 | -0.99665135636280 | 2.97624223630861  | H  | 5.55604048518873  | 5.78189946548140  | -0.48577527050526 |
| H          | -1.77750094807520 | 0.08456265672321  | 3.34205013195119  | H  | 5.10161149592550  | 5.40389875167897  | -2.16950739432561 |
| C          | 2.73236402295946  | 0.45786350608120  | 1.56559928352093  | C  | 2.37477307279691  | 5.07759699345448  | -1.79860773898604 |
| C          | 3.80940002196835  | -0.16360192857211 | 3.75069695125202  | H  | 2.73872533306689  | 4.42606402957390  | -2.60938253259279 |

|            |                   |                   |                   |    |                   |                   |                   |
|------------|-------------------|-------------------|-------------------|----|-------------------|-------------------|-------------------|
| H          | 1.49898348758966  | 4.57987202704789  | -1.35195956864346 | H  | -1.79859598136066 | 0.03880907950274  | 3.36548525451277  |
| C          | 1.97479266258416  | 6.41158967392540  | -2.36385082046222 | C  | 2.80624603490310  | 0.44377484726864  | 1.73194955214931  |
| C          | 0.94508708132622  | 7.16363729917636  | -1.78541238090444 | C  | 3.83352026531314  | -0.31657927821767 | 3.89451258285713  |
| C          | 2.62584081372429  | 6.93507878003374  | -3.48875788216741 | O  | 3.77646813008630  | 0.17873621178948  | 1.02769685145119  |
| C          | 0.58117754469024  | 8.40434812226864  | -2.30553811336617 | H  | 0.18074782005553  | 0.45667760829973  | 2.70442245740969  |
| H          | 0.42090633291672  | 6.76836848854978  | -0.91332782166712 | H  | 0.23766602328454  | 2.41080195555136  | -1.63930387940431 |
| C          | 2.26985645625846  | 8.17853977535300  | -4.01058524234864 | N  | 2.75456852043617  | 0.22893345177462  | 3.05984819257211  |
| H          | 3.42077024807625  | 6.35483644276773  | -3.96527411251072 | H  | 1.91517718958618  | 0.52171503310376  | 3.54537455534716  |
| C          | 1.24610443469802  | 8.91905223845044  | -3.41901379778658 | C  | 4.18118763005828  | -1.73481996509217 | 3.43782077368324  |
| H          | -0.22844021824633 | 8.97184056263965  | -1.83926934317033 | C  | 5.06124105230374  | 0.59504122738119  | 3.82235696306781  |
| H          | 2.79155438004603  | 8.56806992716808  | -4.88877935069531 | C  | 3.29453794941752  | -0.34682415301527 | 5.32233890129692  |
| H          | 0.96240599562755  | 9.89170089418097  | -3.82930669514219 | H  | 4.05604812857951  | -0.75147055388725 | 6.00391108093309  |
| N          | 1.31271896039226  | 3.23662675456064  | 4.35147184082858  | H  | 3.03144157921004  | 0.66690277355253  | 5.66459291140867  |
| H          | 2.14727609843099  | 2.97340661570714  | 3.83422306795372  | H  | 2.39801766582490  | -0.98304222666486 | 5.39038287161842  |
| H          | 1.50137244499519  | 3.23446175620869  | 5.34938246735241  | H  | 5.85504217509941  | 0.21013455486382  | 4.47990866598217  |
| <b>EB8</b> |                   |                   |                   | H  | 5.45088009411237  | 0.64410578954807  | 2.79653566988591  |
| H          | -0.08659647232228 | -1.00671420946917 | 0.69399677533325  | H  | 4.80268629164270  | 1.61376983111929  | 4.15066828143023  |
| C          | -0.42234088611738 | 2.83877510259652  | 0.39095006711059  | H  | 4.96691765296077  | -2.15442548344560 | 4.08379597530069  |
| C          | 0.20773526813947  | 1.93296842073148  | -0.65196935429275 | H  | 3.29607649098756  | -2.38647462058641 | 3.49990138543061  |
| C          | 1.58621665924946  | 1.66198153902972  | -0.10952656040014 | H  | 4.54311319179037  | -1.73104465946281 | 2.40112712439446  |
| H          | 2.47926414567366  | 1.68229445653660  | -0.73587922112285 | Rh | 1.52145118706762  | 3.27920304439232  | 1.44120038335131  |
| C          | 1.57884395212347  | 1.08241987493695  | 1.14971082495581  | C  | 0.62462074897526  | 4.73752004236234  | 2.58068940566661  |
| C          | 0.17935311717361  | 0.87395383852974  | 1.69272890029592  | C  | 0.05043855671748  | 5.89546974379869  | 2.06130641125882  |
| C          | -0.39635321309871 | 2.27209397132604  | 1.66355376762562  | C  | -0.66971304039637 | 6.79022838001452  | 2.86181649566380  |
| H          | -1.01944223081083 | 2.65309287965770  | 2.47496988344144  | C  | -0.79962180820601 | 6.52849552023198  | 4.22377408840367  |
| C          | -0.59054586053878 | 0.60827078281882  | -0.68108965664971 | C  | -0.21123659189084 | 5.39071737016274  | 4.77245147262155  |
| H          | -0.13705204889862 | -0.06136531976643 | -1.42656365545122 | C  | 0.50574748014208  | 4.4891106903815   | 3.96816211043525  |
| H          | -1.61153164439138 | 0.83168487078709  | -1.02835876853431 | H  | 0.16422775527846  | 6.12133560789964  | 0.99786155726899  |
| C          | -0.61897761109384 | -0.03940392167661 | 0.72060906841838  | H  | -1.11459149105465 | 7.68609936775591  | 2.42067258071041  |
| C          | -1.33516252228160 | 3.93203050027185  | -0.04252388980887 | H  | -1.35239586212078 | 7.21545573719885  | 4.87075279729095  |
| H          | -2.14816916692061 | 3.48049404267642  | -0.63783812531817 | H  | -0.29950008785088 | 5.18819895302197  | 5.84472174376243  |
| H          | -0.82558610287184 | 4.65689945237504  | -0.69481541860449 | C  | 3.51719562402700  | 5.28342375475792  | -0.31950047488344 |
| H          | -1.77888418259921 | 4.46129264828673  | 0.80890027345270  | C  | 3.10801983227291  | 5.72184689563706  | 1.08550068602514  |
| C          | -2.05255757811353 | -0.30811844152693 | 1.21081734672575  | C  | 3.86170330035550  | 3.80851003086374  | -0.13096581472446 |
| H          | -2.61034822783994 | 0.64336996157992  | 1.12028181579962  | C  | 3.17323187729888  | 4.55793250314385  | 1.99612331992183  |
| C          | -2.73645702320155 | -1.34104048575000 | 0.31949559653871  | C  | 3.63761440765442  | 3.43169693455993  | 1.28496662852328  |
| H          | -2.73350397145740 | -1.04379800552208 | -0.73989475931127 | H  | 3.24439874749347  | 4.70318934675073  | 3.07547524181372  |
| H          | -3.78462673512728 | -1.48853338763096 | 0.62243595764677  | H  | 4.14293749645001  | 2.56620979280338  | 1.71589342653142  |
| H          | -2.22489363459396 | -2.31532651768288 | 0.39518291841429  | O  | 2.83513837413955  | 6.86393033692121  | 1.39038704296429  |
| C          | -2.11086230660943 | -0.75336096386134 | 2.66880832712445  | O  | 4.29625650522646  | 3.09149040147116  | -1.01113035826643 |
| H          | -1.46243899804626 | -1.62943557143226 | 2.83906194855349  | C  | 2.38863170902159  | 5.48111758197102  | -1.32486681657965 |
| H          | -3.13747816041142 | -1.04168970532207 | 2.94256788930341  | H  | 2.70368214459190  | 5.13669084864110  | -2.32091190976372 |
|            |                   |                   |                   | H  | 1.49475673606814  | 4.91199114351731  | -1.02580559147901 |

|            |                   |                   |                   |    |                   |                   |                   |
|------------|-------------------|-------------------|-------------------|----|-------------------|-------------------|-------------------|
| H          | 2.12085834579277  | 6.54654268211566  | -1.38471007185591 | C  | 2.16651334642221  | -0.28132370408918 | 3.43214878598517  |
| C          | 4.77914199006113  | 6.06134599032971  | -0.75815718156278 | H  | 2.73181681705258  | -0.98525817888538 | 2.79829931404052  |
| H          | 5.04424493409481  | 5.71437220786953  | -1.76863304439006 | H  | 2.18079550883779  | -0.67304944523397 | 4.46101850205378  |
| H          | 4.49770620096425  | 7.12330867848198  | -0.82945480810215 | H  | 2.70863556942392  | 0.67580011348284  | 3.43911158871226  |
| C          | 5.95158650554589  | 5.89324765452475  | 0.17256423716649  | C  | 2.30571111264368  | 1.04608575442933  | -1.34207116418898 |
| C          | 6.12730739009919  | 6.74572342838493  | 1.27125131704717  | C  | 2.78114316203741  | 0.67533609097212  | -3.77750113767211 |
| C          | 6.86973937056677  | 4.85075310032582  | -0.01382860432733 | O  | 3.02240790107724  | 0.13967208127552  | -0.92041748254253 |
| C          | 7.18090362054923  | 6.55397970856301  | 2.16463959090887  | H  | 2.63373745198829  | 1.23910901270504  | 1.32487701028102  |
| H          | 5.42528994635656  | 7.56862636751901  | 1.42716331010978  | H  | -1.83804544899229 | 2.39922186819812  | 0.19186008462522  |
| C          | 7.92415625445428  | 4.65624202269506  | 0.87763857048372  | N  | 2.17217751917959  | 1.37259600113517  | -2.63556020681194 |
| H          | 6.75146880838066  | 4.18155901678224  | -0.86966394474409 | H  | 1.67660761338580  | 2.22974096147491  | -2.84940562517318 |
| C          | 8.08134697134309  | 5.50549608694215  | 1.97325642466077  | C  | 4.30789085992743  | 0.75888342875838  | -3.71652433059317 |
| H          | 7.30160449289287  | 7.23105678234272  | 3.01447681701668  | C  | 2.31974897659380  | -0.78342525017365 | -3.78964876005999 |
| H          | 8.62957599799742  | 3.83763189915884  | 0.71195995853185  | C  | 2.27440245349930  | 1.39087307417232  | -5.02768281516487 |
| H          | 8.90829552418860  | 5.35503217236565  | 2.67206561749495  | H  | 2.69904031946241  | 0.92465586525229  | -5.92807938045715 |
| N          | 1.04277317988427  | 3.33399200725481  | 4.53019178417897  | H  | 1.17634969233474  | 1.33280526639306  | -5.09428146026293 |
| H          | 1.85356275074189  | 2.97224736019362  | 4.03631126705073  | H  | 2.56993862641570  | 2.45050934896565  | -5.00925927458813 |
| H          | 1.20942188551978  | 3.38237808435185  | 5.53019645124181  | H  | 2.73585617165005  | -1.30069548795860 | -4.66710631979717 |
| <b>EB9</b> |                   |                   |                   |    |                   |                   |                   |
| H          | 1.02141069327529  | -0.57826125991515 | 0.85557467971280  | H  | 1.22143670954930  | -0.83892269992092 | -3.84209513073903 |
| C          | -0.26069762975631 | 2.98903574936847  | 1.57164243655159  | H  | 4.74637532951154  | 0.23988799325185  | -4.58214584478376 |
| C          | -0.82233887132134 | 2.09785148490616  | 0.47772610947914  | H  | 4.62791145465791  | 1.81018023184085  | -3.73578821209048 |
| C          | 0.14040809828222  | 2.17715806699227  | -0.68380638823675 | H  | 4.68661955982410  | 0.28894271796698  | -2.79873819310427 |
| H          | -0.22542202691606 | 2.25012664748534  | -1.71140302334183 | Rh | 1.01139589529894  | 4.13234757202960  | 0.20882183465335  |
| C          | 1.40834133282218  | 1.75221142144185  | -0.36874693917761 | C  | 0.23200094316264  | 5.70883878140737  | 1.16722297609952  |
| C          | 1.58871797561900  | 1.47553918236701  | 1.10163076294586  | C  | -0.83303422836766 | 6.26538759153333  | 0.46232174079856  |
| C          | 1.07817947646264  | 2.69235894226488  | 1.83715590290749  | C  | -1.62018544205377 | 7.28603808684725  | 1.01057117881370  |
| H          | 1.56378824397918  | 3.04235804415798  | 2.75146804554518  | C  | -1.30428477645357 | 7.77059293509843  | 2.27840350919408  |
| C          | -0.77974091046579 | 0.63893067717039  | 1.01275225928822  | C  | -0.21284292014487 | 7.25262787432778  | 2.97326592556355  |
| H          | -1.15123723013409 | -0.03932202966811 | 0.23055170148449  | C  | 0.58023689779348  | 6.22424969809983  | 2.43373612906156  |
| H          | -1.48184763734442 | 0.57361159956088  | 1.85810847953999  | H  | -1.07738319988968 | 5.88430042057156  | -0.53702576101596 |
| C          | 0.65180962991468  | 0.27105520250039  | 1.45461491919389  | H  | -2.46241243438400 | 7.69448471884033  | 0.44660433828091  |
| C          | -1.21421155799143 | 3.59531663859068  | 2.55038423463228  | H  | -1.89854747332541 | 8.57029765119336  | 2.72894709420941  |
| H          | -1.78404117158989 | 2.77832820256160  | 3.02632525982287  | H  | 0.04608668501114  | 7.64994357503629  | 3.96002076602038  |
| H          | -1.93593246702679 | 4.26611678218869  | 2.06376074346840  | C  | 4.30956992847122  | 4.34627607805127  | -0.83875757299928 |
| H          | -0.68820774648977 | 4.14836214340060  | 3.33773413160456  | C  | 3.18467228986999  | 4.41518243495112  | -1.88766496870112 |
| C          | 0.73133023175413  | -0.13448429166713 | 2.93667482496023  | C  | 3.66941350867246  | 5.00488937129463  | 0.37260540400293  |
| H          | 0.24608338421462  | 0.66629957970580  | 3.52651013574530  | C  | 2.07512792882708  | 5.21865386416243  | -1.35881090615694 |
| C          | -0.04307285759251 | -1.42774148350799 | 3.17525181738034  | C  | 2.42774009946840  | 5.68284730785708  | -0.06768314295541 |
| H          | -1.09269175116793 | -1.34834459727322 | 2.85436094840711  | H  | 1.37991076174317  | 5.71660955606444  | -2.04048602550867 |
| H          | -0.03947957634951 | -1.69742574804011 | 4.24282616969176  | H  | 2.15573569160566  | 6.65093841425012  | 0.35264601333020  |
| H          | 0.41506447624596  | -2.26118843761148 | 2.61646809577635  | O  | 3.28370187694473  | 3.96592645362030  | -3.01336430390642 |
|            |                   |                   |                   | O  | 4.12475219989957  | 5.01476074149717  | 1.50351007942782  |



|             |                   |                   |                   |    |                   |                   |                   |
|-------------|-------------------|-------------------|-------------------|----|-------------------|-------------------|-------------------|
| C           | 5.41092759657419  | 5.29113393950219  | -1.35004003350125 | H  | -1.15619263608871 | -1.33915836997434 | 2.91757892218967  |
| H           | 5.84160019965761  | 4.88153317665267  | -2.27553937620665 | H  | -0.08247539455399 | -1.68221840916592 | 4.29197670797445  |
| H           | 5.00889034428258  | 6.29278842886815  | -1.56700139099880 | H  | 0.33290732155235  | -2.27869973789309 | 2.66686160054700  |
| H           | 6.20960773907878  | 5.38878626687914  | -0.60176799736176 | C  | 2.12972549567439  | -0.31432353494337 | 3.41496281956976  |
| C           | 4.81910621207560  | 2.91404576546146  | -0.60935460189816 | H  | 2.67155567904162  | -1.03558829425810 | 2.78003708293126  |
| H           | 4.15829733491934  | 2.41940635821110  | 0.11648296268279  | H  | 2.15904037919487  | -0.69180904455731 | 4.44885251314729  |
| H           | 4.70032552681880  | 2.38195918733849  | -1.56159905474434 | H  | 2.68601026389338  | 0.63448399902408  | 3.39724436296704  |
| C           | 6.24989626696020  | 2.76701231875145  | -0.16495938632726 | C  | 2.18539495746873  | 0.93830808348596  | -1.38313490657186 |
| C           | 7.22349488028953  | 2.34458169910479  | -1.07831824809041 | C  | 2.57495028364133  | 0.48527392539552  | -3.81743024676326 |
| C           | 6.64471589280816  | 3.03328782121611  | 1.15316959757679  | O  | 2.91849891940063  | 0.04497367826672  | -0.95981033225948 |
| C           | 8.55587935197877  | 2.19427384206278  | -0.69204351109765 | H  | 2.58034875244674  | 1.15964146910904  | 1.26887698951738  |
| H           | 6.92925634922635  | 2.12654740458187  | -2.10913106668451 | H  | -1.89471525578364 | 2.39314465502528  | 0.22903786838195  |
| C           | 7.97471945511394  | 2.88404628299057  | 1.54300340614288  | N  | 2.00470627130507  | 1.22141804542304  | -2.68055654362889 |
| H           | 5.89726567503205  | 3.37997811264430  | 1.86981439831887  | H  | 1.49634322273113  | 2.06792840914983  | -2.90591259144796 |
| C           | 8.93634796532636  | 2.46391975641092  | 0.62200441187084  | C  | 4.10135392168832  | 0.59015089993087  | -3.81822407659842 |
| H           | 9.29894548088031  | 1.86166205579465  | -1.42173919235478 | C  | 2.13222472261880  | -0.97809900318653 | -3.75343656227821 |
| H           | 8.26376315515343  | 3.09623231109118  | 2.57598130069394  | C  | 2.00913790429167  | 1.14320884849227  | -5.07366100876658 |
| H           | 9.97862598018765  | 2.34507956852574  | 0.92936368585466  | H  | 2.40111644983864  | 0.64307735901041  | -5.97067100884503 |
| N           | 1.63791078149137  | 5.69789932765641  | 3.15647211320469  | H  | 0.90999776169081  | 1.07221833788860  | -5.09176953053519 |
| H           | 2.43147073743631  | 5.37579679305699  | 2.60118508657768  | H  | 2.29326598570111  | 2.20551262582877  | -5.11408342037606 |
| H           | 1.94751233069855  | 6.28440003237517  | 3.92435163227473  | H  | 2.51880169430961  | -1.52423867531094 | -4.62693159385053 |
| <b>EB10</b> |                   |                   |                   |    |                   |                   |                   |
| H           | 0.92213027464705  | -0.63429639817377 | 0.86716874718614  | H  | 4.51438430999796  | 0.05105842732399  | -4.68424804563966 |
| C           | -0.27151060056249 | 2.97016640175082  | 1.55964922895195  | H  | 4.40291318938446  | 1.64530841686102  | -3.87742977967879 |
| C           | -0.87831728699392 | 2.07507922967523  | 0.49357856599163  | H  | 4.52006666727503  | 0.15321722259071  | -2.90138691984467 |
| C           | 0.05723705004141  | 2.12333697873037  | -0.69133794041504 | Rh | 0.99806563650421  | 4.05514766388790  | 0.14088472377860  |
| H           | -0.33412416771332 | 2.18869575307090  | -1.70993343241165 | C  | 0.29805659699764  | 5.66902748244828  | 1.10301704645961  |
| C           | 1.32454232204011  | 1.67640255385688  | -0.40065935798609 | C  | -0.78433611871463 | 6.24319527323468  | 0.43913743124479  |
| C           | 1.53444635707191  | 1.41230274664677  | 1.06879712917117  | C  | -1.52296535842537 | 7.28800081280577  | 1.00907466978556  |
| C           | 1.06609219210094  | 2.64860367269226  | 1.79878944414254  | C  | -1.14111743619345 | 7.77830867122431  | 2.25638067866291  |
| H           | 1.58124069465684  | 3.00803645473344  | 2.69302920510812  | C  | -0.03195334644584 | 7.24292959093733  | 2.90866960884416  |
| C           | -0.85073900015472 | 0.62193118815814  | 1.04460544349315  | C  | 0.71365757790851  | 6.19180175866786  | 2.34584244318388  |
| H           | -1.25096145295779 | -0.05725626978445 | 0.27742881066181  | H  | -1.08258751640356 | 5.85620210336509  | -0.54311373657860 |
| H           | -1.53633458757076 | 0.57765155698353  | 1.90484791103940  | H  | -2.38007159701179 | 7.70941365191591  | 0.47791952491245  |
| C           | 0.58315326570704  | 0.23205164456868  | 1.46002623646801  | H  | -1.69757734012068 | 8.59562417392695  | 2.72337104763416  |
| C           | -1.18721429055830 | 3.61927419778808  | 2.54615179886965  | H  | 0.27910837766782  | 7.64496759349887  | 3.87825662416476  |
| H           | -1.76708083323610 | 2.82639877305346  | 3.05003297909917  | C  | 4.26953149829597  | 4.22676456680754  | -1.06443308373358 |
| H           | -1.90179228777638 | 4.29876528200685  | 2.06115946057199  | C  | 3.10595795399890  | 4.26268102883326  | -2.06494493679927 |
| H           | -0.63074896990950 | 4.17434327516877  | 3.31072031030357  | C  | 3.67858498343609  | 4.91401918841606  | 0.15590654868047  |
| C           | 0.68715493918364  | -0.15236987516088 | 2.94628599655386  | C  | 2.01069837553239  | 5.06773296467535  | -1.50507591271090 |
| H           | 0.22651389635470  | 0.66494440240352  | 3.53314259076721  | C  | 2.41775949053109  | 5.57758599761412  | -0.24709027331717 |
| C           | -0.10208525860051 | -1.42949962083463 | 3.22042936213499  | H  | 1.28649969565943  | 5.54288292308787  | -2.17284471562557 |

|             |                   |                   |                   |    |                   |                   |                   |
|-------------|-------------------|-------------------|-------------------|----|-------------------|-------------------|-------------------|
| H           | 2.17085313764244  | 6.56275072877275  | 0.14771248846646  | C  | -2.20639680906148 | 0.03466397617703  | 1.04839354959576  |
| O           | 3.16063434793037  | 3.80029281176390  | -3.18937705875134 | H  | -2.75242276240183 | 0.97778146164213  | 0.85513349277016  |
| O           | 4.19674551656106  | 4.94766189180413  | 1.25876862738533  | C  | -2.85545551523233 | -1.06391294221157 | 0.21066494695457  |
| C           | 4.84486241832667  | 2.85501647692367  | -0.76679516332797 | H  | -2.80623649554636 | -0.84872359818300 | -0.86733872009210 |
| H           | 5.67745240042990  | 2.95717224427377  | -0.05554581512977 | H  | -3.91621562943210 | -1.18755530894181 | 0.47864417396866  |
| H           | 4.09908788636149  | 2.18593125657915  | -0.32142291408189 | H  | -2.35107634894013 | -2.02967280947001 | 0.38263049891361  |
| H           | 5.22488477229187  | 2.38683806788568  | -1.68500495413551 | C  | -2.33495189680924 | -0.29017379509207 | 2.53290041148834  |
| C           | 5.40111383970393  | 5.14012379568118  | -1.6257771921969  | H  | -1.71016254607325 | -1.15868416351291 | 2.80198543317938  |
| H           | 6.23912210469887  | 5.08041274978017  | -0.91442041311700 | H  | -3.37739532695593 | -0.54099837087596 | 2.78337187274283  |
| H           | 5.73169574998559  | 4.68377346630607  | -2.57196624428641 | H  | -2.03722949972409 | 0.55152185007122  | 3.17558745723326  |
| C           | 5.01584755155260  | 6.57762782752246  | -1.84410018042360 | C  | 2.50838531154843  | 0.71093809809566  | 1.90053598448619  |
| C           | 4.46435118710885  | 7.00100251910937  | -3.06025736453435 | C  | 4.93970237387949  | 0.26485051990574  | 2.20824688263966  |
| C           | 5.16452895630922  | 7.51744884273361  | -0.81552365516442 | O  | 2.16014740599319  | 0.11476483040781  | 2.91938251750872  |
| C           | 4.06131339721587  | 8.32378509678086  | -3.23969556612507 | H  | -0.00187272472916 | 0.93222366573731  | 2.57574729486484  |
| H           | 4.34884483291483  | 6.28210820327749  | -3.87570673381216 | H  | 0.29629737518577  | 2.44744752349105  | -1.91711836091289 |
| C           | 4.76193614811282  | 8.84083089313210  | -0.99120209447070 | N  | 3.78037009055568  | 0.81115422913262  | 1.48489555711520  |
| H           | 5.60082760552883  | 7.20467116564827  | 0.13713873850517  | H  | 3.99808300409292  | 1.39705192557050  | 0.6764888950127   |
| C           | 4.20594781812015  | 9.24795727918031  | -2.20428171317932 | C  | 5.03994440262561  | 0.89792873883690  | 3.59898068648164  |
| H           | 3.63467631126805  | 8.63614630996733  | -4.19651273833577 | C  | 4.82317833315325  | -1.25738990131804 | 2.31282545431811  |
| H           | 4.88849452089424  | 9.55939723160825  | -0.17711878016181 | C  | 6.17782262391510  | 0.62640766879072  | 1.39106535712672  |
| H           | 3.89256902803796  | 10.28560656418320 | -2.34499640547550 | H  | 7.07685818349381  | 0.23246754471061  | 1.88630363224934  |
| N           | 1.79391289231350  | 5.65158267984286  | 3.02486643235724  | H  | 6.12272020479185  | 0.19418537373954  | 0.37989574944565  |
| H           | 2.55737321340890  | 5.31959570926345  | 2.43397644076037  | H  | 6.28335054409099  | 1.71669825672574  | 1.29157127946428  |
| H           | 2.14725552722152  | 6.24031893339980  | 3.77201619573919  | H  | 5.70600154576353  | -1.66597115755837 | 2.82737439808345  |
| <b>EB11</b> |                   |                   |                   | H  | 3.92453119254442  | -1.54350963695150 | 2.87464449753212  |
| H           | -0.22283670399095 | -0.71014757950190 | 0.69026305156089  | H  | 4.76928209424340  | -1.70731652495512 | 1.30938046441680  |
| C           | -0.45574127153404 | 3.10129651231645  | 0.02102997111486  | H  | 5.91899663800718  | 0.50235673671687  | 4.12982541398226  |
| C           | 0.20084804088077  | 2.07670323226304  | -0.88900282324504 | H  | 5.15002367941892  | 1.99039210441909  | 3.51774549699219  |
| C           | 1.54036264913154  | 1.80609763342038  | -0.25281121865531 | H  | 4.14281159541501  | 0.67746338071534  | 4.19238144548679  |
| H           | 2.45313765633171  | 1.74901658301910  | -0.84853525927083 | Rh | 1.36774076259152  | 3.59584183966700  | 1.22426868583094  |
| C           | 1.44541610587044  | 1.36059884114890  | 1.05166740694476  | C  | 0.56790962455824  | 4.81167812016933  | 2.6479472973600   |
| C           | 0.01064592082054  | 1.24998745089520  | 1.52989463340440  | C  | 0.77422689468439  | 4.19979921878138  | 3.88735575789809  |
| C           | -0.55180886167711 | 2.64222433982664  | 1.33452800669366  | C  | 0.28349686943649  | 4.74582552614560  | 5.07823055047489  |
| H           | -1.24354845722095 | 3.08240481838112  | 2.05426028946611  | C  | -0.42929952607341 | 5.94266733102052  | 5.02038718061515  |
| C           | -0.64863880589408 | 0.78184788878230  | -0.83957784289725 | C  | -0.62368823290780 | 6.57764440501614  | 3.79777001470850  |
| H           | -0.19906320964496 | 0.03722635255177  | -1.51252009209120 | C  | -0.12560933033730 | 6.03846103087788  | 2.59363108156787  |
| H           | -1.64652336371670 | 1.01786828346047  | -1.24158166850808 | H  | 1.32685648013526  | 3.25213009910550  | 3.93539686136658  |
| C           | -0.75023941871491 | 0.25658426824038  | 0.60730683981023  | H  | 0.45596714869017  | 4.23730938205430  | 6.03002735647532  |
| C           | -1.26827720028899 | 4.19985044408996  | -0.56960821882442 | H  | -0.82845680229498 | 6.39510988065536  | 5.93244005992412  |
| H           | -2.14019161126107 | 3.75884268223544  | -1.08473975582340 | H  | -1.16749335589857 | 7.52699113579561  | 3.75589267549397  |
| H           | -0.69524768918015 | 4.75684463082006  | -1.32494071897563 | C  | 3.47185989050238  | 4.87769978989427  | -1.11757598469048 |
| H           | -1.61586551868342 | 4.90510369253457  | 0.19529829349546  | C  | 2.54203672098515  | 5.70294264678396  | -0.23707993557900 |
|             |                   |                   |                   | C  | 3.90419621479333  | 3.75583056670500  | -0.17376593845163 |

|             |                   |                   |                   |    |                   |                   |                   |
|-------------|-------------------|-------------------|-------------------|----|-------------------|-------------------|-------------------|
| C           | 2.69852309341515  | 5.25871474383470  | 1.16962115995023  | H  | -2.61675518205573 | 3.68466190199505  | -0.66270476381087 |
| C           | 3.46651260691041  | 4.07063519029678  | 1.19413504723484  | H  | -1.24835369596994 | 4.77006182109650  | -0.97346477314409 |
| H           | 2.59544634499319  | 5.96548783664651  | 1.99272896499037  | H  | -2.03766315234343 | 4.79398735602602  | 0.62720124286817  |
| H           | 3.98112621857092  | 3.65930567415579  | 2.06554825293092  | C  | -2.19485871607778 | -0.21643567885733 | 1.22861341451394  |
| O           | 1.84053747783461  | 6.61835780177114  | -0.62915341269385 | H  | -2.8433209517898  | 0.67772939613432  | 1.15749946612468  |
| O           | 4.55929434797270  | 2.78844306087690  | -0.53239170379094 | C  | -2.81867340197986 | -1.31649410102843 | 0.37391412574510  |
| C           | 4.72417621037914  | 5.72630682710366  | -1.39274115057097 | H  | -2.89615762787260 | -1.02642451216229 | -0.68473832482411 |
| H           | 4.45889042363652  | 6.61254947915134  | -1.98583656112116 | H  | -3.83163387789218 | -1.56283398457122 | 0.72817883416474  |
| H           | 5.19058229210247  | 6.06182221976129  | -0.45384688725067 | H  | -2.21227352048621 | -2.23650411340813 | 0.42537649387510  |
| H           | 5.45987538724344  | 5.13020520938643  | -1.95246040382179 | C  | -2.14525635903821 | -0.64921950709998 | 2.69015762149811  |
| C           | 2.84260529580493  | 4.31707698957992  | -2.40383585098500 | H  | -1.41760905175673 | -1.46585936740087 | 2.83404736347913  |
| H           | 3.52194595893894  | 3.52452217565791  | -2.75596226576694 | H  | -3.12946179579481 | -1.01951037574135 | 3.01646648733767  |
| H           | 1.89174440912019  | 3.83457750521910  | -2.13871506327263 | H  | -1.86520539304667 | 0.17429901745552  | 3.36345790690922  |
| C           | 2.60122602590542  | 5.29878450031523  | -3.51803375181679 | C  | 2.49995713826713  | 0.87676783374991  | 1.740209202923890 |
| C           | 1.36433027358179  | 5.94039480109540  | -3.65845833567753 | C  | 4.98255993281392  | 0.72481560946670  | 1.88102907495603  |
| C           | 3.60386608662505  | 5.57960550382641  | -4.45535231710398 | O  | 2.29538269348268  | 0.22970494220841  | 2.76702471072269  |
| C           | 1.13956537497375  | 6.84725057931091  | -4.69270011495761 | H  | 0.04667044893599  | 0.80193001999215  | 2.61176233478633  |
| H           | 0.56770425360476  | 5.72491689315666  | -2.94339486994119 | H  | -0.18355174302071 | 2.59079500687483  | -1.78047631752068 |
| C           | 3.38560579065019  | 6.48927663474810  | -5.48993761647952 | N  | 3.71958269875606  | 1.11770760567622  | 1.23401569686699  |
| H           | 4.56919719407175  | 5.07191715308908  | -4.37709230074824 | H  | 3.81162810625530  | 1.72934490714632  | 0.41975979320821  |
| C           | 2.15227402497281  | 7.12961451903967  | -5.61041225816085 | C  | 5.09699860672901  | 1.38686490740595  | 3.25757231234642  |
| H           | 0.16529434426152  | 7.33466315104626  | -4.78436354917766 | C  | 5.06118100168969  | -0.79824475072827 | 2.00492611796669  |
| H           | 4.18215348253422  | 6.69359857754196  | -6.21027305846293 | C  | 6.11266551705884  | 1.22266063644595  | 0.98239116037941  |
| H           | 1.97739034338408  | 7.84038582386457  | -6.42228663792416 | H  | 7.08208183594013  | 0.94172586826778  | 1.41842816099941  |
| N           | -0.35758244137752 | 6.69676536043404  | 1.39942795015005  | H  | 6.04381652824814  | 0.77750986770262  | -0.02230400503336 |
| H           | -0.60937277669512 | 7.67379431442383  | 1.50431950394526  | H  | 6.08379875173156  | 2.31734468574248  | 0.87603823796419  |
| H           | 0.35273509936244  | 6.57647191304405  | 0.67776184442382  | H  | 6.02286696874402  | -1.08712550259363 | 2.45530915509079  |
| <b>EB12</b> |                   |                   |                   | H  | 4.24766535737253  | -1.18117057139615 | 2.63453919072689  |
| H           | -0.19634397724944 | -0.73872447840185 | 0.63947811003756  | H  | 4.98955092103061  | -1.26792618060897 | 1.01172081250541  |
| C           | -0.80380778812914 | 3.07043447548028  | 0.25246161195632  | H  | 6.04324002274922  | 1.09535996705106  | 3.73780178848334  |
| C           | -0.15822682828553 | 2.15468166731154  | -0.77450196460302 | H  | 5.08751679725479  | 2.48351649261970  | 3.16100941685502  |
| C           | 1.25042499140304  | 1.96219309005776  | -0.27517175074877 | H  | 4.26635141845615  | 1.08352046946464  | 3.90840454762007  |
| H           | 2.10588636912363  | 2.03207697794829  | -0.94867050411825 | Rh | 1.07040439863215  | 3.64491195384211  | 1.33256125282996  |
| C           | 1.31195705245192  | 1.44170764964399  | 1.00284574038593  | C  | 0.31192093482888  | 4.68390384788122  | 2.91138258138959  |
| C           | -0.06159680650152 | 1.17776420858944  | 1.59102938143435  | C  | 0.67946983847401  | 4.00747398907587  | 4.07810333788508  |
| C           | -0.75099759503178 | 2.52668164036817  | 1.53613080695256  | C  | 0.26247796799961  | 4.42755684980691  | 5.34556840853736  |
| H           | -1.40795616318533 | 2.86268194518747  | 2.33975438793350  | C  | -0.54198953716023 | 5.56197507540215  | 5.44302403351394  |
| C           | -0.89998691606019 | 0.79571043355318  | -0.73538129299463 | C  | -0.89886376344814 | 6.26105114962193  | 4.29395331420530  |
| H           | -0.46651251019867 | 0.13256297122527  | -1.49814228522773 | C  | -0.47557699204697 | 5.84943363679625  | 3.01350717761852  |
| H           | -1.94824366582537 | 0.97449954143080  | -1.02291723418287 | H  | 1.30410759368483  | 3.10758429617308  | 4.00450014749465  |
| C           | -0.81524442534539 | 0.17558775535788  | 0.67412688149829  | H  | 0.56230584104968  | 3.87040420569797  | 6.23662992161077  |
| C           | -1.72555649250062 | 4.14707552891234  | -0.20231553845683 | H  | -0.88656347855964 | 5.91534023860433  | 6.41883443598632  |
|             |                   |                   |                   | H  | -1.51403255951308 | 7.16343118514277  | 4.37222265044883  |

|             |                   |                   |                   |    |                   |                   |                   |
|-------------|-------------------|-------------------|-------------------|----|-------------------|-------------------|-------------------|
| C           | 2.82569051636079  | 5.24476788242737  | -1.08308915781707 | H  | -1.73615219529056 | 0.73232412996016  | 1.46709806800066  |
| C           | 1.93635961302419  | 5.93498065374572  | -0.05812623739607 | C  | 0.32715060421996  | 0.16149646509543  | 0.99464969868799  |
| C           | 3.42086438939666  | 4.09492278563379  | -0.27992847481147 | C  | -1.03582275225465 | 3.74719564799970  | 2.39145265111301  |
| C           | 2.26353948276446  | 5.41149937381411  | 1.28644564414774  | H  | -1.77106550030192 | 3.04486187021293  | 2.82177701629428  |
| C           | 3.11161444771622  | 4.28721478216052  | 1.14490990403377  | H  | -1.60231843401885 | 4.55234204255753  | 1.90409741617132  |
| H           | 2.18913394482445  | 6.04426850145414  | 2.17025686584932  | H  | -0.43790429120482 | 4.16865356723040  | 3.20852756078948  |
| H           | 3.73837010396296  | 3.85927349647223  | 1.92966591525104  | C  | 0.31102735492485  | -0.49256441459515 | 2.38632330164893  |
| O           | 1.13090111543306  | 6.80979997797906  | -0.32805038630279 | H  | -0.06254160459463 | 0.26693143642309  | 3.09975640313532  |
| O           | 4.09207453751707  | 3.20099058355502  | -0.77678002980215 | C  | -0.65206064165945 | -1.67620385465040 | 2.40931831054083  |
| C           | 2.08978887521221  | 4.81703402690866  | -2.33947880890673 | H  | -1.66925957205646 | -1.39109412862753 | 2.10127305641560  |
| H           | 2.75734061136326  | 4.22756681607704  | -2.98448137834079 | H  | -0.71739263760678 | -2.11142555194067 | 3.41863273220239  |
| H           | 1.20701681157783  | 4.21000049807822  | -2.09768052212540 | H  | -0.30476148799357 | -2.46815521704641 | 1.72443807118704  |
| H           | 1.75247386028722  | 5.70226918110217  | -2.89729761992600 | C  | 1.69587377671891  | -0.93327178907843 | 2.84857931489687  |
| C           | 3.98865270582270  | 6.20995515223354  | -1.46459111490239 | H  | 2.16051400532892  | -1.60895477635437 | 2.11047836190976  |
| H           | 4.59980087216774  | 5.68436402373330  | -2.21450249516298 | H  | 1.62905252315534  | -1.47846026372353 | 3.80281797792634  |
| H           | 3.53254210144008  | 7.08328324194702  | -1.95651722579216 | H  | 2.37738337780160  | -0.08387403527025 | 3.00291327656950  |
| C           | 4.84817619860611  | 6.64297928458647  | -0.30907353190907 | C  | 2.35399925274725  | 1.18561177184046  | -1.51836284839122 |
| C           | 4.51011780142438  | 7.76469208673963  | 0.45862707487601  | C  | 2.49517652186427  | 0.11620217364433  | -3.79212202282960 |
| C           | 5.97356800508228  | 5.89485558901690  | 0.06027992326518  | O  | 3.46102616425244  | 0.83014142057016  | -1.12076081449566 |
| C           | 5.26695028705362  | 8.12047825948230  | 1.57477418760738  | H  | 2.42160949356739  | 0.87841374419060  | 1.06568748958807  |
| H           | 3.64001226482581  | 8.36575600998736  | 0.17927941244917  | H  | -1.81794288756906 | 2.75250610887650  | -0.01050345614425 |
| C           | 6.73128630962667  | 6.24649373271283  | 1.17676996199971  | N  | 1.88441136854372  | 0.96776452228319  | -2.75993761626505 |
| H           | 6.25585843452825  | 5.02103196785680  | -0.53312949998233 | H  | 0.90999199890057  | 1.19674524292364  | -2.91440434746799 |
| C           | 6.37721563211495  | 7.35879571604099  | 1.94090489287279  | C  | 3.95228544623735  | 0.49115083177202  | -4.05881580525001 |
| H           | 4.98894594128145  | 9.00012773964388  | 2.16118794220680  | C  | 2.39634261754377  | -1.34607339044014 | -3.34528646430426 |
| H           | 7.6050927388845   | 5.64928775913953  | 1.44902485165742  | C  | 1.67483283828433  | 0.33878334047884  | -5.06098893629787 |
| H           | 6.97026152626227  | 7.63650513487836  | 2.81601226318428  | H  | 2.05238772853268  | -0.29952551581193 | -5.87254478824455 |
| N           | -0.86796128615457 | 6.56922021712815  | 1.89831007065071  | H  | 0.61404083532699  | 0.08883229855258  | -4.89662690087387 |
| H           | -1.18803250580372 | 7.50964354885481  | 2.10330410061643  | H  | 1.74018991384209  | 1.38882606417024  | -5.38541921542702 |
| H           | -0.21572860321560 | 6.56695215497518  | 1.11451155822327  | H  | 2.82872089034232  | -2.01203659918593 | -4.10762179978798 |
| <b>RB13</b> |                   |                   |                   | H  | 2.94508610394299  | -1.49615233540940 | -2.40388792709169 |
| H           | 0.58289884138935  | -0.62424847608112 | 0.26108134687035  | H  | 1.34551793322183  | -1.63519991426594 | -3.18824908729970 |
| C           | -0.19670923856804 | 2.98531187179928  | 1.42143632980221  | H  | 4.32895641705423  | -0.11244585128698 | -4.89834933199394 |
| C           | -0.86104716442823 | 2.28351981268053  | 0.25166941367029  | H  | 4.03745391603367  | 1.55530725353070  | -4.31313594230807 |
| C           | 0.15433756423682  | 2.40356814994215  | -0.85930218816574 | H  | 4.57472864330889  | 0.30031489991501  | -3.17645048033324 |
| H           | -0.16099328596290 | 2.66351472327345  | -1.87356271753901 | Rh | 1.37188054872782  | 3.93906684595016  | 0.13771986779980  |
| C           | 1.36892870407013  | 1.79711724374327  | -0.56150235240922 | C  | 1.45891244802431  | 5.36952811996062  | 1.62205234147255  |
| C           | 1.41846559517878  | 1.25990637000076  | 0.85286345084013  | C  | 2.39651282522270  | 5.23401805009506  | 2.64675446515009  |
| C           | 1.05983956302884  | 2.45205833430432  | 1.70155506620642  | C  | 2.44887719966243  | 6.11585710164657  | 3.73218607451958  |
| H           | 1.57620478564612  | 2.66180265477041  | 2.64085743176703  | C  | 1.52992852680060  | 7.16088575533439  | 3.79927137572245  |
| C           | -1.03399332034130 | 0.79066784339470  | 0.62056398543473  | C  | 0.57734165469237  | 7.31250662513993  | 2.79422322259675  |
| H           | -1.50527049874197 | 0.26583343945106  | -0.22358300344262 | C  | 0.52739989865265  | 6.42893086432599  | 1.70283018812107  |
|             |                   |                   |                   | H  | 3.11412052507782  | 4.40922263766002  | 2.61602040485798  |

|             |                   |                   |                   |    |                   |                   |                   |
|-------------|-------------------|-------------------|-------------------|----|-------------------|-------------------|-------------------|
| H           | 3.19998428281211  | 5.97840140143592  | 4.51450900595399  | H  | 1.53345920177719  | 2.65763893642549  | 2.64340803742772  |
| H           | 1.54494768625849  | 7.86118281849755  | 4.63897562332569  | C  | -1.11097836855067 | 0.88374666069828  | 0.57514213820978  |
| H           | -0.15201210677925 | 8.12696100723859  | 2.84778537388695  | H  | -1.58418251493666 | 0.37340503869397  | -0.27675987185473 |
| C           | 4.37242905038190  | 4.83706446440344  | -1.14294316499142 | H  | -1.83417743959940 | 0.86018173637171  | 1.40541674972267  |
| C           | 3.37170015221017  | 4.20470906329786  | -2.11276387421658 | C  | 0.21310839637873  | 0.20053448437349  | 0.98569087223149  |
| C           | 3.52582633583097  | 5.94037656676409  | -0.50787412033855 | C  | -1.02875559967902 | 3.83588562025830  | 2.33923705094161  |
| C           | 2.00049530782450  | 4.65379418366812  | -1.77451700980312 | H  | -1.79011628020650 | 3.15605929220720  | 2.76039357957902  |
| C           | 2.09954084902736  | 5.71825360683371  | -0.85534802666656 | H  | -1.56482969459604 | 4.65516324545369  | 1.84121218859891  |
| H           | 1.19473052178903  | 4.51870930065551  | -2.50021400776903 | H  | -0.43118137632986 | 4.24195696808651  | 3.16423316362077  |
| H           | 1.37505562273435  | 6.52713717203766  | -0.7460552733730  | C  | 0.13807366896521  | -0.44028779256289 | 2.38135588818925  |
| O           | 3.68086430527277  | 3.53196295152011  | -3.07060961904984 | H  | -0.21540176498000 | 0.34107986463159  | 3.08134501405417  |
| O           | 3.96041680735075  | 6.89236814730413  | 0.1039249891324   | C  | -0.87772077326415 | -1.57936559890134 | 2.39336363591600  |
| C           | 5.55457807273008  | 5.42028435635157  | -1.90522670419829 | H  | -1.87479648695207 | -1.25195772204281 | 2.0623633597170   |
| H           | 6.13020247666504  | 4.61455570401133  | -2.38339089246039 | H  | -0.98307255762079 | -2.00254030705162 | 3.40443713659038  |
| H           | 5.21536074500596  | 6.11593953780900  | -2.68745271196749 | H  | -0.55256092087428 | -2.39205346595110 | 1.72203282560858  |
| H           | 6.21379669393451  | 5.96692507271898  | -1.21728719404445 | C  | 1.49176889081306  | -0.93986186390489 | 2.87505791531233  |
| C           | 4.81407233993146  | 3.75842503729264  | -0.11730542868334 | H  | 1.94091169895372  | -1.63902554887698 | 2.14935493424759  |
| H           | 3.95389522556467  | 3.52653487005033  | 0.53754976901966  | H  | 1.37987024684852  | -1.47771955988732 | 3.82923434512697  |
| H           | 5.01682287696566  | 2.83937178222931  | -0.68652058046494 | H  | 2.20811906682424  | -0.12192249657816 | 3.04170038684814  |
| C           | 6.02403353412924  | 4.11156186802778  | 0.70328528714658  | C  | 2.31662632862875  | 1.10536150606782  | -1.49987853132063 |
| C           | 7.26128840066640  | 3.52607067923477  | 0.40617992702706  | C  | 2.42870750751130  | 0.00090972387727  | -3.75589858998233 |
| C           | 5.95906527919620  | 5.02351410161107  | 1.76555543656875  | O  | 3.40364628194484  | 0.70366653642707  | -1.09393489892059 |
| C           | 8.40334647816083  | 3.84277512387605  | 1.14206760027604  | H  | 2.33490768920594  | 0.82739647203900  | 1.09679142758113  |
| H           | 7.32682430182858  | 2.80815819908071  | -0.41653007774507 | H  | -1.79718886481348 | 2.87447792271777  | -0.08053896407553 |
| C           | 7.09802244400934  | 5.34312684185060  | 2.50279751462773  | N  | 1.83609623372046  | 0.88184504574417  | -2.73829840617046 |
| H           | 5.00748167647579  | 5.49560396481639  | 2.01330766615956  | H  | 0.87702023948041  | 1.16043874682473  | -2.94000134810592 |
| C           | 8.32572398541342  | 4.75559317470378  | 2.19344816940120  | C  | 3.80874602796793  | 0.49825566303621  | -4.18196305869404 |
| H           | 9.35813907315911  | 3.37225829585473  | 0.89272827393566  | C  | 2.51686563123371  | -1.42565411725443 | -3.20492554266984 |
| H           | 7.02499689303241  | 6.05653242056740  | 3.32815766809109  | C  | 1.48021875594513  | 0.03694646783685  | -4.95209004276219 |
| H           | 9.21801334764420  | 5.00599316654611  | 2.77309407830328  | H  | 1.85925150517232  | -0.61336846051480 | -5.75331799687813 |
| N           | -0.40531596044309 | 6.63180771121059  | 0.69251770215300  | H  | 0.47541156620589  | -0.31719752998306 | -4.67033185807385 |
| H           | -0.65133504711544 | 5.79265459420562  | 0.17561294050112  | H  | 1.39224061504209  | 1.05989232277104  | -5.35039099203863 |
| H           | -1.22116930139532 | 7.17474711701681  | 0.95362943195230  | H  | 2.92713466021670  | -2.10321862190953 | -3.96894996988250 |
| <b>EB14</b> |                   |                   |                   |    |                   |                   |                   |
| H           | 0.45188503511264  | -0.60121614727756 | 0.26386062634097  | H  | 1.51802618890643  | -1.79078163871802 | -2.91882953630905 |
| C           | -0.19931079097419 | 3.04341924752752  | 1.38532944590634  | H  | 4.22180280961387  | -0.17799775354933 | -4.94573726271534 |
| C           | -0.86701808693816 | 2.36608928499489  | 0.20357336814674  | H  | 3.74068849932121  | 1.51152600210033  | -4.60011131340078 |
| C           | 0.17708452108426  | 2.43965428055606  | -0.88361428819118 | H  | 4.49204105896762  | 0.53222784879077  | -3.32464302524461 |
| H           | -0.10276608688828 | 2.71077365749250  | -1.90561365334377 | Rh | 1.44274339715053  | 3.92012963534460  | 0.12668078359193  |
| C           | 1.35614928693426  | 1.77750148728748  | -0.55941265787917 | C  | 1.48734547055174  | 5.38757872932030  | 1.57543826245402  |
| C           | 1.35384760388856  | 1.25029026915607  | 0.85966933498419  | C  | 2.38312809151418  | 5.29054238725585  | 2.64052592200992  |
| C           | 1.02840440573678  | 2.46216766386681  | 1.69449282549495  | C  | 2.38244567340413  | 6.20791694834049  | 3.69732406350377  |
|             |                   |                   |                   | C  | 1.46131550142357  | 7.25311872600491  | 3.68677173263374  |

|             |                   |                   |                   |    |                   |                   |                   |
|-------------|-------------------|-------------------|-------------------|----|-------------------|-------------------|-------------------|
| C           | 0.55795444456591  | 7.37230514706744  | 2.63301792221977  | C  | 1.49904391733512  | 1.44360198865835  | 1.14874696942643  |
| C           | 0.55718027559373  | 6.45043881844529  | 1.57321609765910  | C  | 0.12144767842327  | 1.22231205834679  | 1.73502862096189  |
| H           | 3.11428162997644  | 4.47690510451189  | 2.65857428695131  | C  | -0.52339460103666 | 2.58788861550467  | 1.64760084560340  |
| H           | 3.09758354225374  | 6.10129764618166  | 4.51725570490701  | H  | -1.15659857037744 | 2.97700296460509  | 2.44826758214347  |
| H           | 1.43868566467926  | 7.98140040917263  | 4.50224605291684  | C  | -0.69018621588656 | 0.79944964497445  | -0.59770652713227 |
| H           | -0.17025808250726 | 8.18959178681379  | 2.62331360477657  | H  | -0.22921626534763 | 0.11224978282009  | -1.32232679026974 |
| C           | 4.55101041023668  | 4.74803183117708  | -0.85315420447426 | H  | -1.72777388392561 | 0.96560483025949  | -0.92798455702682 |
| C           | 3.66614618374071  | 4.01826231708271  | -1.86012456954503 | C  | -0.65582967092546 | 0.22325536404019  | 0.83441814031612  |
| C           | 3.63335714856600  | 5.86936469301232  | -0.36631218818261 | C  | -1.54028726310700 | 4.13384708965288  | -0.12481886189364 |
| C           | 2.27277897770389  | 4.51949520275390  | -1.74759686020784 | H  | -2.34963282803304 | 3.63313907821540  | -0.68481718643056 |
| C           | 2.26927559159308  | 5.64451510936451  | -0.89771733005292 | H  | -1.05474465770703 | 4.83340969196957  | -0.82136324185666 |
| H           | 1.56253606041686  | 4.32627695055794  | -2.55519297454402 | H  | -1.98432085326200 | 4.69704349259881  | 0.70435813675732  |
| H           | 1.53254346337051  | 6.45006971701009  | -0.90530753580973 | C  | -2.05993152614651 | -0.09592146437779 | 1.37555329081322  |
| O           | 4.07164705477070  | 3.22145581499050  | -2.67572733794288 | H  | -2.67296657409447 | 0.81757137042909  | 1.25381039796788  |
| O           | 3.99627356689665  | 6.80976177323001  | 0.30739820667502  | C  | -2.70860006264025 | -1.20839572488058 | 0.55632499708382  |
| C           | 4.93567329282842  | 3.81787344148572  | 0.29824656157970  | H  | -2.75028259646167 | -0.96465367172019 | -0.51591902521591 |
| H           | 5.48956458897028  | 4.37770012941420  | 1.06654839273778  | H  | -3.73837160612287 | -1.39822001661368 | 0.89663074884665  |
| H           | 4.04005065437220  | 3.37428054776774  | 0.76487871022276  | H  | -2.14110334832180 | -2.14807234080692 | 0.66423274372292  |
| H           | 5.56817689423550  | 2.99962778866841  | -0.07621864237572 | C  | -2.05424102445128 | -0.46785625275634 | 2.85498042522902  |
| C           | 5.81277802950600  | 5.31861073959005  | -1.52785681707130 | H  | -1.35652598028967 | -1.30024662635043 | 3.04780326366205  |
| H           | 6.36685374861061  | 5.87735986517520  | -0.75781270340627 | H  | -3.05637757992120 | -0.79241415917562 | 3.17531674753903  |
| H           | 6.43685707686956  | 4.46523094139511  | -1.83365153441962 | H  | -1.76087205388163 | 0.37375844005351  | 3.49975799145683  |
| C           | 5.54119874080273  | 6.20524453851697  | -2.71544430923104 | C  | 2.64795235079513  | 0.72659362819094  | 1.80571462109553  |
| C           | 5.49760467665449  | 5.67271323584150  | -4.01139836746134 | C  | 5.05299537897859  | 0.06888870055766  | 1.62248052867942  |
| C           | 5.30620664250430  | 7.57776049152822  | -2.55378572670334 | O  | 2.44909114710153  | 0.13751191965288  | 2.86780336609297  |
| C           | 5.21427916783812  | 6.48193986725821  | -5.11085515846920 | H  | 0.21387786072038  | 0.86107083261899  | 2.76307607053968  |
| H           | 5.68351413245543  | 4.60564043274493  | -4.15383183266151 | H  | 0.04340246013738  | 2.58152713585865  | -1.66728434458413 |
| C           | 5.02171241468502  | 8.38998374614290  | -3.65131075124525 | N  | 3.82666986324346  | 0.73796092598991  | 1.16071041736753  |
| H           | 5.34695727325806  | 8.01229539278706  | -1.55219266320146 | H  | 3.93817978056165  | 1.35445299240299  | 0.35540265262100  |
| C           | 4.97073567613034  | 7.84429868737440  | -4.93429615704439 | C  | 5.51608081629056  | 0.66181882869349  | 2.95604678251014  |
| H           | 5.18632100217143  | 6.04517345965851  | -6.11271477436610 | C  | 4.80912779534681  | -1.43573882184111 | 1.75508977108513  |
| H           | 4.84333440960860  | 9.45832989928906  | -3.50264405204610 | C  | 6.11119900698267  | 0.32263331124468  | 0.55091267635199  |
| H           | 4.74840915304949  | 8.48025039769552  | -5.79512204465663 | H  | 7.05879333268552  | -0.15355712315208 | 0.84072996782444  |
| N           | -0.32620360448590 | 6.61492202772800  | 0.51182508641703  | H  | 5.79640594284698  | -0.09618266477282 | -0.41784330705252 |
| H           | -0.54643430792867 | 5.75311137057164  | 0.02062318713271  | H  | 6.28898294761494  | 1.40051707129425  | 0.41935395069364  |
| H           | -1.15640100498251 | 7.16061457956529  | 0.71612796903041  | H  | 5.74042694711699  | -1.93970835181005 | 2.05468663445654  |
| <b>EB15</b> |                   |                   |                   |    |                   |                   |                   |
| H           | -0.07335273954783 | -0.71514251762379 | 0.84270982241042  | H  | 4.03848156221432  | -1.64275627690817 | 2.50884768485888  |
| C           | -0.59300343391306 | 3.08890527467172  | 0.35023892844470  | H  | 4.48173557010584  | -1.85708520659631 | 0.79206643198450  |
| C           | 0.05226105612555  | 2.15678798774278  | -0.65561902570057 | H  | 6.43305427711429  | 0.15653727749222  | 3.29513803679415  |
| C           | 1.45413184491550  | 1.97472967122411  | -0.13270702300631 | H  | 5.73725376702674  | 1.73499638393869  | 2.84698673296815  |
| H           | 2.30511734939996  | 1.99447419581659  | -0.81628820992339 | H  | 4.74316943824563  | 0.53761406064074  | 3.72648084146292  |
|             |                   |                   |                   | Rh | 1.35309319806567  | 3.65134494916476  | 1.36577309740974  |
|             |                   |                   |                   | C  | 0.41703128641299  | 5.16158924732021  | 2.39921492671219  |

|             |                   |                   |                   |   |                   |                   |                   |
|-------------|-------------------|-------------------|-------------------|---|-------------------|-------------------|-------------------|
| C           | -0.17418356895701 | 6.27840501530358  | 1.81700039173006  | C | -0.08050768102723 | 2.14850026385607  | -0.53729319223258 |
| C           | -0.87706233606016 | 7.22409516393890  | 2.57318242206450  | C | 1.34350112179177  | 2.01069315120405  | -0.06665472436157 |
| C           | -0.97742773942777 | 7.05082652961848  | 3.95169377857109  | H | 2.16982138569011  | 2.09789302197708  | -0.77419793815225 |
| C           | -0.37870773046210 | 5.94894830599935  | 4.56015523677753  | C | 1.45614628630345  | 1.44139852674251  | 1.19365117132279  |
| C           | 0.32799907941842  | 5.00099191675870  | 3.80197159002739  | C | 0.11013160612327  | 1.14193073185041  | 1.81781736276673  |
| H           | -0.08501492266894 | 6.43118850260253  | 0.73977160028372  | C | -0.59321833434296 | 2.48119246144062  | 1.79664346182814  |
| H           | -1.33430502760628 | 8.08771721087762  | 2.08343093372773  | H | -1.21696545168033 | 2.81585456282169  | 2.62885014337603  |
| H           | -1.52124868419299 | 7.77572197456442  | 4.56382615835135  | C | -0.76221233926288 | 0.75907272522640  | -0.50032272413440 |
| H           | -0.44987720114823 | 5.81213708543203  | 5.64394369739869  | H | -0.29276559923825 | 0.11488797951286  | -1.25828410587448 |
| C           | 3.45101090451140  | 5.27646213518674  | -0.62175420811034 | H | -1.81500669243273 | 0.88909689760137  | -0.79683140245773 |
| C           | 2.89196800663329  | 6.02321870531419  | 0.59099630403625  | C | -0.66096303505297 | 0.14282787006090  | 0.91199890411962  |
| C           | 3.83037850456611  | 3.92086647279369  | -0.03164628434113 | C | -1.73714635331243 | 4.03429103214356  | 0.10849282803527  |
| C           | 2.89043779640959  | 5.11308728190185  | 1.76383233506335  | H | -2.53321652473794 | 3.51668611124438  | -0.45511720092479 |
| C           | 3.46848221764661  | 3.88190929074757  | 1.39655636064364  | H | -1.30234641498345 | 4.78623821103616  | -0.56735874274882 |
| H           | 2.86662600522083  | 5.51654030348288  | 2.77588493097234  | H | -2.18945447829316 | 4.54068311157491  | 0.96924299471453  |
| H           | 3.93048351416138  | 3.17409181241612  | 2.08642742257331  | C | -2.03572572916813 | -0.23885075987094 | 1.48732592319957  |
| O           | 2.58507189767530  | 7.19579067904867  | 0.60035149644935  | H | -2.68309463603760 | 0.65578881298781  | 1.41038585129843  |
| O           | 4.37202316344176  | 3.02969062433585  | -0.66638619492054 | C | -2.67303250643291 | -1.35027197724202 | 0.65786903672871  |
| C           | 4.71909332577868  | 5.97565743890712  | -1.11212101713158 | H | -2.75874989351374 | -1.07893049747030 | -0.40511456162476 |
| H           | 4.48208780715083  | 6.99638451307783  | -1.44206029401767 | H | -3.68403678914321 | -1.58465412146970 | 1.02559471720838  |
| H           | 5.47001710090167  | 6.03688559667846  | -0.30954728089224 | H | -2.07106465897458 | -2.27244355789912 | 0.72043563159469  |
| H           | 5.15503793089270  | 5.41902300213104  | -1.95444338724862 | C | -1.97164216039954 | -0.64921200040664 | 2.95493651376803  |
| C           | 2.40902971357346  | 5.06934010386906  | -1.74547829803323 | H | -1.24533060213708 | -1.46615159585202 | 3.10373695167601  |
| H           | 2.82296981925917  | 4.30015239107868  | -2.41705542182050 | H | -2.95353965706459 | -1.01099741479444 | 3.29736205252360  |
| H           | 1.49833425593128  | 4.64779323082346  | -1.28915328577774 | H | -1.68199466397566 | 0.18335316477372  | 3.61296110020397  |
| C           | 2.05735537596687  | 6.29439494758210  | -2.54134421610313 | C | 2.66489013669603  | 0.77761803959787  | 1.79655721454272  |
| C           | 0.98289422512989  | 7.11251899952897  | -2.17214741972811 | C | 5.11104201675387  | 0.31894654984588  | 1.54851308187934  |
| C           | 2.79904906253562  | 6.64491084971575  | -3.67717194249669 | O | 2.53747257806060  | 0.15695366469717  | 2.85141060093797  |
| C           | 0.66453553869309  | 8.25384167163453  | -2.90647811639762 | H | 0.25248886800896  | 0.75308019039482  | 2.83011590404387  |
| H           | 0.38562556376964  | 6.84909938250991  | -1.29661207348824 | H | -0.14052297039573 | 2.60404385047506  | -1.53362086429814 |
| C           | 2.48717997587334  | 7.78738287142708  | -4.41346214494279 | N | 3.82102791003196  | 0.88188206934819  | 1.11865118151797  |
| H           | 3.63049960233832  | 6.00824783658480  | -3.99193920376771 | H | 3.86220928461744  | 1.51776860973977  | 0.32103642997419  |
| C           | 1.41963629203110  | 8.59855083877091  | -4.02816470420591 | C | 5.54530246628644  | 0.92988962719226  | 2.88436783809445  |
| H           | -0.18053990317684 | 8.87683019744884  | -2.60200301009789 | C | 5.00592137168971  | -1.20349308288506 | 1.65953953402615  |
| H           | 3.07894268930079  | 8.04212342289209  | -5.29664297297572 | C | 6.12417711480268  | 0.68628804566977  | 0.46628987984531  |
| H           | 1.17162960659571  | 9.49304425316563  | -4.60539482086203 | H | 7.11326686474092  | 0.28459729395561  | 0.72903968606845  |
| N           | 0.98281968662457  | 3.94821049907453  | 4.43024615867465  | H | 5.82861260268381  | 0.26658135911759  | -0.50804160181805 |
| H           | 1.10129489011147  | 3.12196472682377  | 3.84993959084179  | H | 6.20992461597809  | 1.77848322277980  | 0.36114926884946  |
| H           | 0.64264734530416  | 3.71543675385585  | 5.35722686716238  | H | 5.98370490644641  | -1.62723297371791 | 1.93414430249513  |
| <b>EB16</b> |                   |                   |                   | H | 4.27105053031574  | -1.48989581855810 | 2.42312251427851  |
| H           | -0.04735444521076 | -0.77468134359633 | 0.87165290412424  | H | 4.69857264438234  | -1.63734401160780 | 0.69548361463880  |
| C           | -0.72917313191735 | 3.01963501920781  | 0.51930195788848  | H | 6.50607759736139  | 0.49684477916364  | 3.20141670605298  |
|             |                   |                   |                   | H | 5.67986534065436  | 2.01877253777318  | 2.78906826158016  |

|    |                   |                  |                   |            |                   |                   |                   |
|----|-------------------|------------------|-------------------|------------|-------------------|-------------------|-------------------|
| H  | 4.79914768641826  | 0.73245151634822 | 3.66580052878888  | <b>CRI</b> |                   |                   |                   |
| Rh | 1.22196503881038  | 3.63466834567640 | 1.49211745842903  | H          | 0.88665006377124  | -0.65896259091283 | 0.74249507924078  |
| C  | 0.24470490516391  | 5.07302844948552 | 2.58479981101943  | C          | -0.52051279811227 | 2.85831248184093  | 1.55861393801347  |
| C  | -0.40429522392815 | 6.17361734524474 | 2.03335665019837  | C          | -1.07334209083808 | 1.91981437960418  | 0.50213561529278  |
| C  | -1.14062750658683 | 7.06715038212703 | 2.82097037092946  | C          | -0.12477181505342 | 2.12671464615372  | -0.64983581417377 |
| C  | -1.21396677950593 | 6.85777512381650 | 4.19622088557454  | H          | -0.47183405067357 | 2.09897318734643  | -1.68599826984609 |
| C  | -0.55638131856155 | 5.77222221167329 | 4.77238885437427  | C          | 1.21073691410462  | 1.77486727670309  | -0.34112582719371 |
| C  | 0.18376090273628  | 4.87550733978338 | 3.98383325068087  | C          | 1.36708771481995  | 1.39135599538618  | 1.12190139793863  |
| H  | -0.33514403458133 | 6.35527403020290 | 0.95804421229830  | C          | 0.80906744394895  | 2.59929646392488  | 1.84054612204665  |
| H  | -1.64469572466383 | 7.91961767793092 | 2.35807620406530  | H          | 1.30961002492472  | 3.02565119088333  | 2.71533498162857  |
| H  | -1.78322622661426 | 7.54223288169536 | 4.83142817246648  | C          | -0.95827055050237 | 0.46611973021880  | 1.02154556006523  |
| H  | -0.60583070853368 | 5.60900522208180 | 5.85373187984058  | H          | -1.33586805185459 | -0.22408563016970 | 0.25210301657778  |
| C  | 3.19334235049388  | 5.45730235915690 | -0.46133150376181 | H          | -1.62303129851842 | 0.36364895880149  | 1.89431407886313  |
| C  | 2.61954762550388  | 6.09981057181725 | 0.80263536969095  | C          | 0.50150674359783  | 0.13460028599127  | 1.40895290406222  |
| C  | 3.60604100497694  | 4.07289241967321 | 0.02142113099728  | C          | -1.45932574102865 | 3.56700817274512  | 2.47256132001178  |
| C  | 2.71883607661077  | 5.13782331180838 | 1.92355253470061  | H          | -2.00025811248414 | 2.80473718599614  | 3.06167465199089  |
| C  | 3.32499316558989  | 3.95269600092669 | 1.46348584373274  | H          | -2.21132375495835 | 4.15124225405540  | 1.92634090562069  |
| H  | 2.71052535454045  | 5.48080300691118 | 2.95797873401342  | H          | -0.93329517743008 | 4.22843087416048  | 3.17240423793729  |
| H  | 3.83955957371335  | 3.22565608926639 | 2.09207190374894  | C          | 0.62975518593869  | -0.38298273873294 | 2.85128904575339  |
| O  | 2.21031095499531  | 7.24020951216295 | 0.86070876503246  | H          | 0.14433244284723  | 0.36151479896128  | 3.51116607229575  |
| O  | 4.11949575455757  | 3.22334709462919 | -0.69101633499094 | C          | -0.10836972577889 | -1.70932830661954 | 3.01198287348148  |
| C  | 2.16453268687513  | 5.40430187425858 | -1.58336614695827 | H          | -1.16703160775928 | -1.63348579570286 | 2.72193252770693  |
| H  | 2.58011365974880  | 4.88110092050155 | -2.45711004658276 | H          | -0.07164737790965 | -2.05879147128553 | 4.05563973460831  |
| H  | 1.25497582228200  | 4.87696484940814 | -1.25488848135320 | H          | 0.35528225537132  | -2.48711246505391 | 2.38156951866406  |
| H  | 1.88420420143096  | 6.42544125957766 | -1.88087324446032 | C          | 2.08136702521723  | -0.53554228339714 | 3.29643755227710  |
| C  | 4.45520150195248  | 6.23581502983886 | -0.90652316237571 | H          | 2.64343294143457  | -1.17261465586019 | 2.59191635342660  |
| H  | 4.83076463438484  | 5.75925733789343 | -1.82506801994247 | H          | 2.13441493832521  | -1.01075450966194 | 4.28828804162003  |
| H  | 4.13251766159518  | 7.25641994087255 | -1.16438462532384 | H          | 2.60499636288350  | 0.42914633130980  | 3.36856585290106  |
| C  | 5.53700693619226  | 6.27444680329286 | 0.14065471769427  | C          | 2.02813735423977  | 1.12463156097771  | -1.42276393639722 |
| C  | 5.55748202194344  | 7.27949542678940 | 1.11682705949367  | C          | 4.05083759243698  | -0.34492103221145 | -1.77421257505380 |
| C  | 6.51512740408242  | 5.27219806741762 | 0.19590757362136  | O          | 1.61685592197503  | 1.05371391393875  | -2.57764040806408 |
| C  | 6.51922396433349  | 7.27583760517913 | 2.12677106942709  | H          | 2.41468121792397  | 1.23155372947817  | 1.40356466078349  |
| H  | 4.80739994175512  | 8.07379091375939 | 1.08333847487800  | H          | -2.11043555989233 | 2.17076811846590  | 0.24194846003489  |
| C  | 7.47657674494294  | 5.26424607923519 | 1.20589182874860  | N          | 3.17754430788889  | 0.55048146698387  | -1.00534963579905 |
| H  | 6.51878343571711  | 4.48616263433042 | -0.56346006832226 | H          | 3.39555292655717  | 0.63025325488527  | -0.02098364417664 |
| C  | 7.47917069716570  | 6.26477373728741 | 2.17827631131537  | C          | 3.27329384450822  | -1.59847638067914 | -2.18407610027633 |
| H  | 6.51992193421751  | 8.07048022229674 | 2.87752929755161  | C          | 4.61245432865249  | 0.36401978496631  | -3.00691913682048 |
| H  | 8.23030654097115  | 4.47270175929964 | 1.23000344263421  | C          | 5.19373055692199  | -0.72720796280361 | -0.83534832809053 |
| H  | 8.23268139284613  | 6.26101979868411 | 2.97006799774920  | H          | 5.88604986661464  | -1.41506477299084 | -1.34137720847758 |
| N  | 0.89677862442660  | 3.84205574388137 | 4.58007262471474  | H          | 5.75997899698821  | 0.16452724929778  | -0.52246198505589 |
| H  | 1.05154001929972  | 3.03569466025695 | 3.98072018428858  | H          | 4.80878223979630  | -1.23007093211524 | 0.06656509253486  |
| H  | 0.5798527201747   | 3.57167011387813 | 5.50516321479783  | H          | 5.29649638308108  | -0.31112875462852 | -3.54307015751525 |
|    |                   |                  |                   | H          | 3.80236089997186  | 0.66293648736754  | -3.68353405100235 |



|    |                   |                   |                   |            |                   |                   |                   |
|----|-------------------|-------------------|-------------------|------------|-------------------|-------------------|-------------------|
| H  | 5.16946034272135  | 1.26774176872059  | -2.71745685479031 | H          | 3.28352620244883  | 6.77163401802626  | 1.71289518049097  |
| H  | 3.92728732555153  | -2.28790564797270 | -2.73941853781998 | H          | 2.54821178057210  | 6.89915151764116  | 3.24432896013155  |
| H  | 2.89339565726554  | -2.12313550409529 | -1.29350178206396 |            |                   |                   |                   |
| H  | 2.42164827532440  | -1.33163803455692 | -2.82508445280543 |            |                   |                   |                   |
| Rh | 0.86968193735866  | 3.84245003260023  | 0.01602693237551  | <b>CR2</b> |                   |                   |                   |
| C  | 1.05292095447517  | 6.11787406410907  | 0.36988537747175  | H          | 0.83964476399169  | -0.62985029338238 | 0.83367287050451  |
| C  | -0.28764220222517 | 6.11164466204171  | -0.11009641461383 | C          | -0.49669773683936 | 2.92030783178918  | 1.65408522590192  |
| C  | -1.37837604046336 | 6.40535478300498  | 0.70351165465751  | C          | -1.10385328923542 | 1.94381349964482  | 0.66084783843890  |
| C  | -1.14815063507756 | 6.71782632153361  | 2.04074243736451  | C          | -0.20043186236434 | 2.12288064947516  | -0.53201134749675 |
| C  | 0.14120194089711  | 6.72279238585051  | 2.55145093455620  | H          | -0.58697484592789 | 2.09782675738532  | -1.55432486258225 |
| C  | 1.26627081622307  | 6.45102452762690  | 1.74780028532126  | C          | 1.15019501001048  | 1.77937158339119  | -0.27830594156857 |
| H  | -0.45568593615752 | 5.99068915560973  | -1.18123922285065 | C          | 1.36212320818691  | 1.41148270376799  | 1.18246180766144  |
| H  | -2.38730052892441 | 6.41112496180808  | 0.28704785828047  | C          | 0.84325322586666  | 2.64597361428842  | 1.88820538115875  |
| H  | -1.98441863897726 | 6.96003907509624  | 2.70170907218473  | H          | 1.39204082715343  | 3.10118865796824  | 2.71880968071917  |
| H  | 0.31230084716590  | 6.97745585650505  | 3.60086952874922  | C          | -0.97425792934016 | 0.50845447936350  | 1.22045128159583  |
| C  | 4.15756907658074  | 4.68770042547791  | -1.15615684737399 | H          | -1.41214975100572 | -0.20387906292387 | 0.50502310879027  |
| C  | 3.01268803399923  | 4.270151331312445 | -2.09155608795007 | H          | -1.58056377048771 | 0.44929842070888  | 2.13870515715747  |
| C  | 3.59552566597111  | 5.90401782811988  | -0.46420114060918 | C          | 0.50248198039042  | 0.16564598920193  | 1.52328600443819  |
| C  | 1.75706763004129  | 4.85077598749531  | -1.62842365381073 | C          | -1.37108189774239 | 3.71244229384354  | 2.56406322711088  |
| C  | 2.10241719435788  | 6.05656276214718  | -0.75469212196777 | H          | -1.90564279835713 | 3.01739029645114  | 3.23591406059529  |
| H  | 1.02538489134631  | 4.99658001752149  | -2.43350098861830 | H          | -2.12861214029128 | 4.28391143902503  | 2.01129885054876  |
| H  | 2.06642597388416  | 7.02300881846197  | -1.29967378464196 | H          | -0.79135512326505 | 4.40898991017423  | 3.18480548032143  |
| O  | 3.20342337509379  | 3.59613470293329  | -3.09061019597020 | C          | 0.71204136178553  | -0.35853001689448 | 2.95333416443042  |
| O  | 4.26952982690628  | 6.69857451358496  | 0.15852000681457  | H          | 0.28917445994910  | 0.39473267571730  | 3.64553955616856  |
| C  | 5.43737562468108  | 4.98741183582850  | -1.91800693473092 | C          | -0.04409439429227 | -1.66850111910637 | 3.15884833057338  |
| H  | 5.80318302790617  | 4.07271307204983  | -2.40605074135045 | H          | -1.11865293978600 | -1.56666480737579 | 2.94562502387781  |
| H  | 5.25985054771105  | 5.74291306335004  | -2.69791613691110 | H          | 0.05897162491876  | -2.02656367005365 | 4.19508513018157  |
| H  | 6.21570701124932  | 5.36395292998968  | -1.24043657085273 | H          | 0.35545194372701  | -2.45194864767135 | 2.49250375916778  |
| C  | 4.34507546656839  | 3.55443553196247  | -0.10350315122444 | C          | 2.18613524484582  | -0.54666535726490 | 3.30117435630510  |
| H  | 3.39967026396707  | 3.44438560878471  | 0.45887996433408  | H          | 2.68653001338106  | -1.19161594723274 | 2.55822620023885  |
| H  | 4.46895514314733  | 2.62864768728042  | -0.68202667688222 | H          | 2.29340272338261  | -1.02960734118843 | 4.28487432884751  |
| C  | 5.49541063430020  | 3.70854637476428  | 0.84661687311292  | H          | 2.73566541224390  | 0.40531505628957  | 3.34423290954741  |
| C  | 6.75838635782392  | 3.20164560024739  | 0.51011415295873  | C          | 1.90915074134357  | 1.13861274067443  | -1.40536805100371 |
| C  | 5.33748764148088  | 4.33527062735771  | 2.08926588776984  | C          | 3.76272436611114  | -0.50015609214002 | -1.87590621578127 |
| C  | 7.83774601147450  | 3.32844822561434  | 1.38325643503676  | O          | 1.49001692260191  | 1.18164731858849  | -2.55942459134149 |
| H  | 6.89149871173600  | 2.69327655596542  | -0.44902463203984 | H          | 2.41968377397934  | 1.25012223928722  | 1.42408384292448  |
| C  | 6.41474139619208  | 4.46208174225111  | 2.96575810973538  | H          | -2.14893623327380 | 2.19386681604051  | 0.43423712498214  |
| H  | 4.35773911101702  | 4.73032117682285  | 2.37198398030607  | N          | 3.00355771702964  | 0.43770783899137  | -1.03851843651842 |
| C  | 7.66959069710675  | 3.96321803484037  | 2.61452829035305  | H          | 3.22762386676154  | 0.41884581631569  | -0.05249887997588 |
| H  | 8.81415982510793  | 2.92448533385751  | 1.10291746665843  | C          | 2.84338172352411  | -1.62787514282241 | -2.35460625164487 |
| H  | 6.27221581789686  | 4.95226698874122  | 3.93253979323994  | C          | 4.39139747519291  | 0.21924233767581  | -3.06950553184501 |
| H  | 8.51337837390118  | 4.06160728122422  | 3.30247651770152  | C          | 4.86086153378634  | -1.07288647760149 | -0.98218042936163 |
| N  | 2.50831814199161  | 6.49969303634054  | 2.31414456250408  | H          | 5.46182484077962  | -1.80419177840916 | -1.54150127713353 |
|    |                   |                   |                   | H          | 5.53187087520157  | -0.27568804372661 | -0.62542888137180 |

|    |                   |                   |                   |            |                   |                   |                   |
|----|-------------------|-------------------|-------------------|------------|-------------------|-------------------|-------------------|
| H  | 4.42842105952864  | -1.58328844071142 | -0.10632973580807 | H          | 4.69483182969112  | 9.96981158236309  | -1.12159499890725 |
| H  | 4.97418723631815  | -0.49592334281081 | -3.66969206064509 | H          | 3.67242763411764  | 10.11108632385704 | -3.39264077146554 |
| H  | 3.61520818579527  | 0.66928659272797  | -3.70083805336182 | N          | 1.76909669225453  | 6.92610374884793  | 2.49328472705909  |
| H  | 5.06430080839397  | 1.02054406197262  | -2.73020146488950 | H          | 2.69257304728921  | 6.59345181985856  | 2.21047513876334  |
| H  | 3.40947534441207  | -2.34683128381103 | -2.96622912329554 | H          | 1.62887427403446  | 7.26949229374575  | 3.43336967063959  |
| H  | 2.41471006377943  | -2.16674560909232 | -1.49520452920166 |            |                   |                   |                   |
| H  | 2.02117105756496  | -1.22316477349265 | -2.96027363345946 | <b>CR3</b> |                   |                   |                   |
| Rh | 0.80230483509851  | 3.84838115198660  | 0.06457201313953  | H          | -0.50788071151435 | -1.05733541178630 | 0.51504685941720  |
| C  | 0.78662125841217  | 6.10814095861016  | 0.40450697720098  | C          | -0.60645305942990 | 2.80767702526766  | 0.15229413420175  |
| C  | -0.42389850827526 | 6.00397749986685  | -0.34283733048525 | C          | 0.02106253284452  | 1.83324064642638  | -0.83639866073425 |
| C  | -1.67042359149462 | 6.35008442123593  | 0.17395677159998  | C          | 1.34832473944217  | 1.52830318248475  | -0.17613329484542 |
| C  | -1.73742274919709 | 6.86643326638338  | 1.46653232861448  | H          | 2.27473991741335  | 1.42602831703731  | -0.74739883846156 |
| C  | -0.58655275682546 | 7.02155081645932  | 2.22003041149309  | C          | 1.19723808303643  | 0.95516482230786  | 1.10188659572251  |
| C  | 0.69152554593537  | 6.67393353257917  | 1.72592767849558  | C          | -0.26090864831543 | 0.82258711521538  | 1.51691254786304  |
| H  | -0.37326960256818 | 5.74445856923194  | -1.39873069800866 | C          | -0.74180094519495 | 2.25710584380505  | 1.41895469694967  |
| H  | -2.56409082517805 | 6.25293959862685  | -0.44506499533084 | H          | -1.35926821394969 | 2.71500574997316  | 2.19573979573701  |
| H  | -2.69981893586956 | 7.15907518600014  | 1.89528149452600  | C          | -0.84295174187638 | 0.55802131452681  | -0.90988240097643 |
| H  | -0.64399841251397 | 7.43873132236098  | 3.22894774137401  | H          | -0.38061642086613 | -0.14921255415101 | -1.61509618217162 |
| C  | 4.12408009873647  | 4.54663956709029  | -0.76423855689856 | H          | -1.82485526815053 | 0.83037167714002  | -1.32920362487452 |
| C  | 3.07295110371350  | 4.23863775689513  | -1.83281902902334 | C          | -1.00893051371031 | -0.07279268549444 | 0.49238428426663  |
| C  | 3.38108388537938  | 5.43891080056737  | 0.20516641543288  | C          | -1.29764942724975 | 4.03777662497341  | -0.33701107311746 |
| C  | 1.82456304253698  | 4.89905237974278  | -1.50157804953622 | H          | -2.13110084964007 | 3.74697144883412  | -1.00044204205005 |
| C  | 2.08515816070112  | 5.95739261708765  | -0.43098621931172 | H          | -0.62380348968257 | 4.67259519553416  | -0.93273309518368 |
| H  | 1.20935174044184  | 5.15561150434710  | -2.37035944859575 | H          | -1.70432670178530 | 4.63241811558410  | 0.49147834113064  |
| H  | 2.36839835220211  | 6.95649693181045  | -0.83292944736290 | C          | -2.48566927439073 | -0.29946810887811 | 0.85691472295199  |
| O  | 3.33274177322738  | 3.58508075720714  | -2.83342615546955 | H          | -3.00428884670144 | 0.66934605761000  | 0.72417669321653  |
| O  | 3.83651505104669  | 5.72124684083112  | 1.29638720236303  | C          | -3.12281405459742 | -1.31060739023325 | -0.09280603159943 |
| C  | 4.68604727584957  | 3.31447512979568  | -0.06939132294213 | H          | -3.02706728969030 | -1.00966635023776 | -1.14679097638921 |
| H  | 5.43823524577538  | 3.61338501194909  | 0.67486064249247  | H          | -4.19552159367529 | -1.43351624494444 | 0.12354043514713  |
| H  | 3.88974215772741  | 2.76072217614745  | 0.44546516176185  | H          | -2.64356812089629 | -2.29814607159997 | 0.01736112565698  |
| H  | 5.15773020798132  | 2.64779198634245  | -0.80493550109095 | C          | -2.68188928611018 | -0.74549355593950 | 2.30213649439449  |
| C  | 5.28609111723117  | 5.34095563605628  | -1.41970447264884 | H          | -2.09330148744274 | -1.65352225289572 | 2.51788869913951  |
| H  | 6.06591206645538  | 5.48368226996694  | -0.65596608174338 | H          | -3.73992025195461 | -0.98409725465682 | 2.49226823328891  |
| H  | 5.69504343978322  | 4.68559582981040  | -2.20450908699452 | H          | -2.38517635823409 | 0.02792976837021  | 3.02585898950452  |
| C  | 4.88632842339907  | 6.67071702913778  | -1.99666906855373 | C          | 2.27840354164694  | 0.14601740141647  | 1.75486888054038  |
| C  | 4.32406524381884  | 6.76584276610649  | -3.27676826936015 | C          | 3.29540506795773  | -0.36400281132882 | 3.99559297975910  |
| C  | 5.01731455334305  | 7.83988818989040  | -1.23574531329822 | O          | 3.02961844878825  | -0.56969711085479 | 1.09792282937250  |
| C  | 3.88934509638986  | 7.99346633595767  | -3.77456182131765 | H          | -0.34604620179517 | 0.42719051065656  | 2.53536435758212  |
| H  | 4.22132605438105  | 5.86313355969829  | -3.88405088042700 | H          | 0.15018248210230  | 2.29261242901067  | -1.82563950607318 |
| C  | 4.58419455713997  | 9.06929500135537  | -1.73129485072518 | N          | 2.32198913380964  | 0.26575984161728  | 3.09693062712769  |
| H  | 5.45962378212294  | 7.78147579072669  | -0.23714191245566 | H          | 1.71393874720953  | 0.97116948422000  | 3.49914848448292  |
| C  | 4.01353670259534  | 9.14896927524641  | -3.00191716640113 | C          | 3.20036109631856  | -1.88701321380215 | 3.88467256340320  |
| H  | 3.45223492338093  | 8.04824484117196  | -4.77507783050325 | C          | 4.70923161947341  | 0.11613459786596  | 3.65587809574978  |

|    |                   |                   |                   |            |                   |                   |                   |
|----|-------------------|-------------------|-------------------|------------|-------------------|-------------------|-------------------|
| C  | 2.92340801141714  | 0.07757377981049  | 5.40850356533840  | H          | 3.84053741733089  | 4.76305871777004  | -3.96200604095878 |
| H  | 3.62416433097160  | -0.35431082093350 | 6.13722668578834  | C          | 2.08181610595159  | 7.65686469804716  | -4.33303086959281 |
| H  | 2.96829968112806  | 1.17489078446029  | 5.49956756585543  | H          | 0.69290116293021  | 8.45323313343244  | -2.88097494611493 |
| H  | 1.90584210096704  | -0.25345698868750 | 5.66895019323759  | H          | 3.50141176018326  | 6.60997787626126  | -5.58256280232169 |
| H  | 5.44432391654269  | -0.36455295684951 | 4.31899071305923  | H          | 1.92732073750525  | 8.46897216244714  | -5.04826060989803 |
| H  | 4.96196914922700  | -0.12874848040205 | 2.61518042160586  | N          | 0.73009962010424  | 6.90262527666307  | 1.17397652538214  |
| H  | 4.78829003683379  | 1.20627353634538  | 3.78799036916380  | H          | 0.01030366804254  | 7.61281159560555  | 1.12720262478342  |
| H  | 3.90215006185817  | -2.36011650670482 | 4.58804599905560  | H          | 1.67174889226041  | 7.23025631393864  | 0.97822386825227  |
| H  | 2.18178310699490  | -2.22639622851923 | 4.12865368401081  |            |                   |                   |                   |
| H  | 3.44493268342187  | -2.21713900567085 | 2.86633450363997  | <b>CR4</b> |                   |                   |                   |
| Rh | 1.30478986997367  | 3.03556646185798  | 1.28710564127417  | H          | -0.61821435913396 | -0.92958484191032 | 0.35036163518394  |
| C  | 1.59320468678730  | 4.97945574164421  | 2.42510541920251  | C          | -0.94823422118267 | 2.93180848859151  | 0.61161810655180  |
| C  | 1.33952654683963  | 4.05707145271479  | 3.48540291561061  | C          | -0.40498104371533 | 2.15807591969897  | -0.58383667946510 |
| C  | 0.11899916531140  | 4.00753691091530  | 4.16046571122321  | C          | 1.00972004241367  | 1.85439776158053  | -0.13496241996346 |
| C  | -0.89147112325296 | 4.88953918956528  | 3.78301941494280  | H          | 1.86466626726467  | 1.90176694580004  | -0.81429315952556 |
| C  | -0.67095378935041 | 5.82454210267855  | 2.78198652012115  | C          | 1.04085630111083  | 1.09554932239701  | 1.05167524880047  |
| C  | 0.56503759759366  | 5.92618684657099  | 2.10986200584496  | C          | -0.34747960482755 | 0.79317542846157  | 1.59918235235203  |
| H  | 2.16704669303919  | 3.45206850988110  | 3.86044158492773  | C          | -0.90703599399431 | 2.19021002916848  | 1.78632152425708  |
| H  | -0.02608941860565 | 3.29550470880246  | 4.97520415662714  | H          | -1.44287005137252 | 2.48723324499379  | 2.69163339558869  |
| H  | -1.86082896508914 | 4.86627011826545  | 4.28773354040136  | C          | -1.20656095623682 | 0.85292249632515  | -0.75666234648461 |
| H  | -1.45755131168845 | 6.53515666029379  | 2.51452264400277  | H          | -0.80008413513101 | 0.29294068089616  | -1.61245456555444 |
| C  | 3.82740828395492  | 4.65223725765818  | -0.47362689196564 | H          | -2.24487016594854 | 1.11817698184818  | -1.01293093698670 |
| C  | 3.40158383283688  | 5.64952463892294  | 0.58164537009743  | C          | -1.16723128575151 | 0.01057538089509  | 0.53906690900397  |
| C  | 3.97893355035898  | 3.34899640514993  | 0.32381292914031  | C          | -1.71646357423857 | 4.19462274332987  | 0.40830252357877  |
| C  | 3.04489742009350  | 4.95457806713527  | 1.90136490336832  | H          | -2.59331152913697 | 3.99682718780342  | -0.23277957150459 |
| C  | 3.35374056144012  | 3.48776995917765  | 1.62143516735063  | H          | -1.10538431685739 | 4.95271943487514  | -0.10713618740677 |
| H  | 3.70610914998998  | 5.43824182064579  | 2.64791555751045  | H          | -2.06492494179761 | 4.61317319812319  | 1.36160309863110  |
| H  | 3.75778661515209  | 2.85795147862741  | 2.42156860613883  | C          | -2.57524029198400 | -0.36790217186862 | 1.02867883681117  |
| O  | 3.44203249348824  | 6.85201511369890  | 0.42879098242499  | H          | -3.15481574750170 | 0.57220002541656  | 1.10584252511907  |
| O  | 4.55271700739929  | 2.36922404162114  | -0.14089374609998 | C          | -3.27148737783198 | -1.26904231896326 | 0.01190653378765  |
| C  | 5.14250736491928  | 5.05148392837429  | -1.12790379851736 | H          | -3.31797881867526 | -0.81065408873549 | -0.98727157159397 |
| H  | 5.04188247088302  | 6.01438889557218  | -1.64703191772104 | H          | -4.30305811962346 | -1.49396858254736 | 0.32492979190467  |
| H  | 5.94242071272813  | 5.14249995851517  | -0.37774843010872 | H          | -2.73435818751424 | -2.22769489559081 | -0.08555751918743 |
| H  | 5.43865373131690  | 4.28132409485675  | -1.85447297231164 | C          | -2.57344561918805 | -1.03267936960557 | 2.40133211160989  |
| C  | 2.69171267446871  | 4.44453810551412  | -1.51641849639751 | H          | -1.92045701329074 | -1.92205483396551 | 2.40887058394494  |
| H  | 2.95182357771865  | 3.52133678076294  | -2.05816010416115 | H          | -3.58827033542464 | -1.36516512473663 | 2.67003036008711  |
| H  | 1.75777654258014  | 4.23447185759971  | -0.96607196918711 | H          | -2.22984193925459 | -0.35537011310280 | 3.19702606046967  |
| C  | 2.47557846643038  | 5.56368583980895  | -2.49336667502053 | C          | 2.25457218481437  | 0.33938359222599  | 1.50531188607527  |
| C  | 1.58774446626827  | 6.60951071002325  | -2.20966354163430 | C          | 3.49145717991394  | -0.32386247472393 | 3.59310787567142  |
| C  | 3.15554874457974  | 5.58008255582135  | -3.71866915392352 | O          | 3.04397294886662  | -0.16091975152465 | 0.70967187154841  |
| C  | 1.39222022935757  | 7.64745773523832  | -3.11997044074929 | H          | -0.28800977168490 | 0.24215758064097  | 2.54423485497615  |
| H  | 1.04683558174203  | 6.60850439986532  | -1.25945810466820 | H          | -0.42821472198185 | 2.76681143489704  | -1.49774032048379 |
| C  | 2.96346870792158  | 6.61710173395436  | -4.63084355170094 | N          | 2.37341523706105  | 0.26309617963159  | 2.84791002962172  |

|    |                   |                   |                   |            |                   |                   |                   |
|----|-------------------|-------------------|-------------------|------------|-------------------|-------------------|-------------------|
| H  | 1.72215316540500  | 0.82890592981355  | 3.38180686726777  | C          | 5.81044002999633  | 7.87761696916283  | 2.19421867124225  |
| C  | 3.63599500452704  | -1.80566322440386 | 3.24169991961181  | H          | 4.37652234515293  | 8.27501158638877  | 0.63069822213419  |
| C  | 4.78237955432858  | 0.43799078568043  | 3.27981909207648  | C          | 6.87545146716719  | 5.71542450862102  | 2.12427211338347  |
| C  | 3.14485528703078  | -0.17418338127641 | 5.07239436805506  | H          | 6.27955810203962  | 4.41834916858793  | 0.50545989690992  |
| H  | 3.95007525083619  | -0.59042781674040 | 5.69450914474172  | C          | 6.70799765160506  | 6.95808797250187  | 2.73700318515893  |
| H  | 3.01898625648725  | 0.88750025917747  | 5.34027174813792  | H          | 5.67970700765422  | 8.85728471105533  | 2.66123848138115  |
| H  | 2.21145691474161  | -0.70714041113756 | 5.31232350961520  | H          | 7.58267917802674  | 4.99150708015781  | 2.53766164442057  |
| H  | 5.62915466152161  | -0.00154376446501 | 3.82841674452547  | H          | 7.28119298120682  | 7.21160597546605  | 3.63249008057389  |
| H  | 5.00319743832065  | 0.40017601940987  | 2.20403192773187  | N          | -0.14042273541998 | 6.88131375790474  | 2.30604925722956  |
| H  | 4.68760403039616  | 1.49299133584863  | 3.58012579927753  | H          | -1.03611573848641 | 7.34559642935917  | 2.36713750251738  |
| H  | 4.44816306286033  | -2.25406186248627 | 3.83352888901125  | H          | 0.51854584493988  | 7.16426528767258  | 1.58081584200859  |
| H  | 2.70358522764324  | -2.34619056243974 | 3.46680525399621  |            |                   |                   |                   |
| H  | 3.86387013706579  | -1.93099795530959 | 2.17515753720208  | <b>CR5</b> |                   |                   |                   |
| Rh | 1.04811530642635  | 3.13254263617948  | 1.53393587864816  | H          | 0.17918476415436  | -0.72589456040531 | 0.50822245579418  |
| C  | 1.23471043792352  | 4.93249708188213  | 2.87031290149592  | C          | -0.90226307658425 | 2.87840083302454  | 1.43982743152416  |
| C  | 1.38656724864473  | 3.85798379455321  | 3.80333037950599  | C          | -1.30407839587438 | 2.13420252776544  | 0.17646228814319  |
| C  | 0.39361026432914  | 3.49598379345104  | 4.71344722686061  | C          | -0.07921358004780 | 2.29568477126005  | -0.69323692538099 |
| C  | -0.79522260231761 | 4.22541053821828  | 4.73068607358028  | H          | -0.16163738533518 | 2.43402954760942  | -1.77500262609908 |
| C  | -0.95744099973367 | 5.31848721214398  | 3.89673918876276  | C          | 1.07743803662814  | 1.73314089385327  | -0.11376377198707 |
| C  | 0.04781468587089  | 5.73768555948519  | 2.99156331140256  | C          | 0.81494174137169  | 1.17322255373775  | 1.27689115307041  |
| H  | 2.35458022609520  | 3.36447234368754  | 3.88657331665578  | C          | 0.25332997565952  | 2.36972067151368  | 2.01198123155778  |
| H  | 0.56389487709113  | 2.66762019200203  | 5.40382403940213  | H          | 0.56830403921029  | 2.63031576506219  | 3.02587457360777  |
| H  | -1.60003366775325 | 3.95343347477719  | 5.41895299100430  | C          | -1.51610923633681 | 0.64232038947915  | 0.51726695304490  |
| H  | -1.87676962220116 | 5.90857783302193  | 3.94181449377324  | H          | -1.78693690563399 | 0.09945908871029  | -0.40107077034437 |
| C  | 3.11821558566170  | 5.12392994335130  | -0.43159814493224 | H          | -2.37813987613210 | 0.56312762454690  | 1.19936519272280  |
| C  | 2.32600341132316  | 5.86645607970420  | 0.62450027044046  | C          | -0.24983505079144 | 0.04606385130945  | 1.17273417338343  |
| C  | 3.52724198120551  | 3.83082625888320  | 0.27047959346585  | C          | -1.91076462088202 | 3.73764926440662  | 2.12509915200690  |
| C  | 2.49115549769824  | 5.21605387250288  | 2.00446038613332  | H          | -2.78865873814273 | 3.11518805787374  | 2.37347062207350  |
| C  | 3.05607724619288  | 3.84582670658255  | 1.63340544456809  | H          | -2.26596509332001 | 4.54922730736808  | 1.47162325017280  |
| H  | 3.19389317456387  | 5.88359436097556  | 2.54957148943510  | H          | -1.52143893484798 | 4.17145319577272  | 3.05293705701154  |
| H  | 3.66224772820735  | 3.28648877921913  | 2.35262533990618  | C          | -0.55066324169466 | -0.62787445420781 | 2.52193130659313  |
| O  | 1.72036477620669  | 6.88835207915621  | 0.36992179390390  | H          | -1.09374404336511 | 0.11179649564880  | 3.14094871308795  |
| O  | 4.18624559562157  | 2.96195954277890  | -0.29603437791382 | C          | -1.45994210393115 | -1.83836908563617 | 2.32535683918829  |
| C  | 2.31234094330470  | 4.89781989398533  | -1.70352162503604 | H          | -2.39272640888821 | -1.57855642301146 | 1.80237660094021  |
| H  | 2.90790005756688  | 4.30766522421495  | -2.41512117088635 | H          | -1.73334088985984 | -2.28877084291068 | 3.29236304029705  |
| H  | 1.38335114146832  | 4.35045803139454  | -1.48824092636841 | H          | -0.94769537890500 | -2.61207820353586 | 1.72853173697175  |
| H  | 2.05201893322014  | 5.85900194715358  | -2.17011473164820 | C          | 0.70999138092960  | -1.03931980490045 | 3.27577332103631  |
| C  | 4.39838014711637  | 5.93688144482463  | -0.76532018316580 | H          | 1.35054525166241  | -1.68413305068499 | 2.64985705753065  |
| H  | 4.98224408063232  | 5.32050006590202  | -1.46673738726761 | H          | 0.45044877391250  | -1.60912632963268 | 4.18167337935830  |
| H  | 4.08251816217984  | 6.84791556799198  | -1.29651195950717 | H          | 1.31171063160583  | -0.17522949395910 | 3.59419001622196  |
| C  | 5.23286997311556  | 6.30386167643492  | 0.43201080861593  | C          | 2.14842080917182  | 1.09551436626971  | -0.95485908014451 |
| C  | 5.08015366840304  | 7.55107869404731  | 1.05143524483174  | C          | 4.44342981255300  | 0.08307523845505  | -0.79381695073974 |
| C  | 6.14604427872491  | 5.39317461262016  | 0.98101485870444  | O          | 1.87934376704030  | 0.63953424688034  | -2.06293747372148 |

|    |                   |                   |                   |            |                   |                   |                   |
|----|-------------------|-------------------|-------------------|------------|-------------------|-------------------|-------------------|
| H  | 1.73722594692382  | 0.80251802091728  | 1.73795749561227  | C          | 6.20892085038295  | 4.38528447086487  | 0.24873803344648  |
| H  | -2.20084641005006 | 2.57441051723741  | -0.28006319128886 | C          | 7.36908758583798  | 4.10255273368176  | -0.48513701763860 |
| N  | 3.35376802904943  | 0.97117679196857  | -0.36214526679857 | C          | 6.34601260392278  | 5.02062362999276  | 1.48954248402397  |
| H  | 3.44463856555810  | 1.37925391611344  | 0.56065773604219  | C          | 8.62839648309274  | 4.45710738651108  | -0.00301295607166 |
| C  | 3.94844035286649  | -1.36673629019823 | -0.77190749534842 | H          | 7.27953641017171  | 3.59014695946213  | -1.44720635086305 |
| C  | 4.93658682027370  | 0.45367425509892  | -2.19356688030744 | C          | 7.60303404937974  | 5.37668608310683  | 1.97568331841029  |
| C  | 5.57516394980887  | 0.25637097504020  | 0.21651339929062  | H          | 5.45672250321212  | 5.23976793813736  | 2.08511111066412  |
| H  | 6.41153844841792  | -0.40972331870413 | -0.03948437555267 | C          | 8.74921199714404  | 5.09953683364735  | 1.22946884149033  |
| H  | 5.95196812498695  | 1.29051803032560  | 0.22142453313541  | H          | 9.52040125006547  | 4.22471884947217  | -0.59073636415074 |
| H  | 5.23699343515697  | 0.00381647931080  | 1.23429876534796  | H          | 7.68801925997733  | 5.87088480174436  | 2.94712695016391  |
| H  | 5.75082960535152  | -0.22409002881265 | -2.49105539805912 | H          | 9.73512161823819  | 5.37621807572735  | 1.61184233395520  |
| H  | 4.12048488476202  | 0.37548955755039  | -2.92264090145482 | N          | -0.58202407638126 | 7.18803188751599  | 0.31232280715950  |
| H  | 5.32205068746064  | 1.48379969190163  | -2.21665232396704 | H          | -0.42958756249672 | 6.91447081839200  | -0.64973862016772 |
| H  | 4.75751726603940  | -2.05311159684673 | -1.06424221297633 | H          | -1.53909179428745 | 7.44443687346095  | 0.52118950266350  |
| H  | 3.60863852415283  | -1.64045095525958 | 0.23919140090888  |            |                   |                   |                   |
| H  | 3.11030073566352  | -1.49896990772185 | -1.47029814565974 | <b>CR6</b> |                   |                   |                   |
| Rh | 0.88201116744713  | 3.76906192560129  | 0.41097232558583  | H          | -0.19279515846200 | -0.74124787485064 | 0.33755280227181  |
| C  | 1.39220521450882  | 5.95690333957671  | 1.01806660307231  | C          | -0.95111563625569 | 2.91519337010152  | 1.35535996491246  |
| C  | 2.08860757074652  | 5.32546454083752  | 2.07499104971435  | C          | -1.29390584986745 | 2.25627476182967  | 0.02804749325663  |
| C  | 1.60230270545094  | 5.32812590115172  | 3.38256236465157  | C          | 0.03433112905458  | 2.28546597098087  | -0.69430529161163 |
| C  | 0.40186535920144  | 5.98383307915960  | 3.64876521606212  | H          | 0.09406934237060  | 2.46316052370317  | -1.77188770081441 |
| C  | -0.32615139034710 | 6.58211810217467  | 2.62772619322688  | C          | 1.04261172113685  | 1.58149915403954  | -0.00293756230223 |
| C  | 0.12879069364319  | 6.56350951244615  | 1.29737985782468  | C          | 0.54934181748947  | 1.00960714531791  | 1.31970989297496  |
| H  | 3.07260110145270  | 4.89575754800265  | 1.88167035134355  | C          | 0.05201273617127  | 2.24510825427251  | 2.03882478344460  |
| H  | 2.16916334271207  | 4.84447595672960  | 4.17989192157531  | H          | 0.27893530212209  | 2.44026925815686  | 3.09022378023863  |
| H  | 0.01201027432345  | 6.01900225892200  | 4.66949931735751  | C          | -1.72838154046010 | 0.79884819222563  | 0.29163039072615  |
| H  | -1.27732355629294 | 7.07353427299697  | 2.84765595324767  | H          | -1.99110431493916 | 0.32041377525375  | -0.6641146524109  |
| C  | 4.13792475770760  | 5.05629164036472  | -1.16395408825075 | H          | -2.64702723104203 | 0.81880343735118  | 0.90058449385205  |
| C  | 2.90651978823496  | 4.38803159056619  | -1.79791385326653 | C          | -0.61098782251361 | 0.01994896914674  | 1.02115224444046  |
| C  | 3.54547358976422  | 6.16751307005420  | -0.31892990867637 | C          | -1.90892702780884 | 3.89950683821508  | 1.93976459446199  |
| C  | 1.68639964588836  | 4.89206203949027  | -1.19081861112478 | H          | -2.89953008200145 | 3.41881406967658  | 2.02347853606388  |
| C  | 2.01925556435123  | 6.11612562799772  | -0.36104284552900 | H          | -2.0334543282034  | 4.77854008857614  | 1.28802965965743  |
| H  | 0.82839970022931  | 4.93991075266325  | -1.87757778157121 | H          | -1.60082118778131 | 4.23584688828521  | 2.93642237440504  |
| H  | 1.69614084826535  | 7.07820724227681  | -0.80048364404921 | C          | -1.12282621092883 | -0.72353851358407 | 2.26467805801232  |
| O  | 3.01011691403676  | 3.57926310552131  | -2.71049320844641 | H          | -1.61985314352652 | 0.02342086684604  | 2.91309070425525  |
| O  | 4.17803277768030  | 7.00368683869358  | 0.28163083860104  | C          | -2.15995701480036 | -1.77314809041931 | 1.87227447500531  |
| C  | 5.03977798638521  | 5.62862457047358  | -2.25305133520357 | H          | -3.00440297733598 | -1.33741807210300 | 1.31760799442935  |
| H  | 5.41563158104996  | 4.81245267041798  | -2.88700126210367 | H          | -2.56910771295543 | -2.27711157205161 | 2.76188862739701  |
| H  | 4.48361177384251  | 6.33194920365206  | -2.89168778349190 | H          | -1.70331434709971 | -2.54609852802479 | 1.23087149636556  |
| H  | 5.89258266646006  | 6.16110900285450  | -1.80976421766476 | C          | 0.00066598860228  | -1.37482159009555 | 3.06479053610269  |
| C  | 4.86452967268709  | 3.99797994458592  | -0.29530584921405 | H          | 0.60124001998823  | -2.04385580686843 | 2.42462628302983  |
| H  | 4.19481730443877  | 3.68913191770448  | 0.52257628977665  | H          | -0.40970654304253 | -1.98242158247948 | 3.88634881559286  |
| H  | 4.97358385607561  | 3.11854403638265  | -0.94437933563947 | H          | 0.68202506592931  | -0.63623953655051 | 3.51203611358775  |

|    |                   |                   |                   |            |                   |                   |                   |
|----|-------------------|-------------------|-------------------|------------|-------------------|-------------------|-------------------|
| C  | 2.15017358720389  | 0.84425458513584  | -0.69806168652683 | C          | 5.22109204775441  | 5.51238573029519  | -2.12389152375795 |
| C  | 4.39177552338775  | -0.19613346230103 | -0.27327571199152 | H          | 6.12781690567159  | 5.99501131526387  | -1.72692070832073 |
| O  | 1.93836199844324  | 0.27302111385650  | -1.76483788133266 | H          | 5.53329720836310  | 4.74222628267942  | -2.8459164383929  |
| H  | 1.36612989788368  | 0.51858119669799  | 1.86082054747019  | C          | 4.34118564036358  | 6.53344306951534  | -2.79499471543183 |
| H  | -2.07099997922281 | 2.81809057640901  | -0.50762035528023 | C          | 3.49234313342090  | 6.17018173130576  | -3.84922736080912 |
| N  | 3.30350306856044  | 0.75534412362673  | -0.00782669020276 | C          | 4.31497789676769  | 7.86021383202235  | -2.34528912813887 |
| H  | 3.34766371521688  | 1.27886947641288  | 0.85959658794299  | C          | 2.63269439895515  | 7.10254493992324  | -4.42833455285602 |
| C  | 3.85146924566416  | -1.62650858028786 | -0.17467770918055 | H          | 3.50359623957941  | 5.13925452598189  | -4.21145449615282 |
| C  | 5.00509748062832  | 0.04311761031994  | -1.65458874309388 | C          | 3.45526590537009  | 8.79523907191834  | -2.92133194169684 |
| C  | 5.44455964150968  | 0.03065794992519  | 0.80844716853143  | H          | 4.97793499357227  | 8.16282714389178  | -1.53001843539703 |
| H  | 6.27078864801670  | -0.68376318349043 | 0.68408627075994  | C          | 2.60746913130920  | 8.41778372556421  | -3.96299047909776 |
| H  | 5.85816204185929  | 1.04842104767276  | 0.75051624669652  | H          | 1.97868831956707  | 6.79989876034533  | -5.25049301036479 |
| H  | 5.01366532334037  | -0.11484193287325 | 1.81195572740948  | H          | 3.45089540448130  | 9.82550397306986  | -2.55586410529793 |
| H  | 5.8553055986708   | -0.63837266940102 | -1.80728445464351 | H          | 1.93334978800941  | 9.14901019161384  | -4.41655868634091 |
| H  | 4.26217916381770  | -0.13235257894240 | -2.44315240378151 | N          | 0.00673587431421  | 7.14990894538634  | 0.76323962051096  |
| H  | 5.36232902521494  | 1.07830860844488  | -1.74671102531645 | H          | 0.13901586652763  | 6.96066215024280  | -0.22198444905192 |
| H  | 4.65878617722271  | -2.35181222749776 | -0.35769229262955 | H          | -0.92543458673406 | 7.47071048343305  | 0.99488804927093  |
| H  | 3.43630800548890  | -1.81506207482607 | 0.82780091137490  |            |                   |                   |                   |
| H  | 3.06006441134226  | -1.79221820372441 | -0.91866679776403 |            |                   |                   |                   |
| Rh | 1.03397892645404  | 3.59773250549400  | 0.56999923448910  | <b>CR7</b> |                   |                   |                   |
| C  | 1.81914095445129  | 5.63132434746626  | 1.33491821033228  | H          | -0.25314176009006 | -0.89108587305946 | 0.68296302897244  |
| C  | 2.42879994258378  | 4.81424820824654  | 2.31876234068625  | C          | -0.75579372272153 | 2.93842064646899  | 0.33787292193789  |
| C  | 1.92601838250918  | 4.73228139790957  | 3.61750764001378  | C          | -0.16024396710999 | 2.01541830093410  | -0.71455317886133 |
| C  | 0.79634265088507  | 5.47922641117665  | 3.94841714540493  | C          | 1.25430256998408  | 1.84053402832013  | -0.21258460383422 |
| C  | 0.15595605361532  | 6.26354940198016  | 2.99761040788985  | H          | 2.11418720642843  | 1.82514748158334  | -0.88742118979166 |
| C  | 0.62999077463620  | 6.34367805362818  | 1.67504385549397  | C          | 1.30375216890134  | 1.26438680853956  | 1.07505442513024  |
| H  | 3.36561096557570  | 4.30577958313424  | 2.08029920581874  | C          | -0.08067414832619 | 1.00977826547528  | 1.65580364802238  |
| H  | 2.42428416119361  | 4.10726878240181  | 4.36067035326921  | C          | -0.69514141693900 | 2.39760527369551  | 1.61505454685934  |
| H  | 0.39437574386019  | 5.44233800379776  | 4.96431648937065  | H          | -1.25868750922754 | 2.81103395463906  | 2.45622983058816  |
| H  | -0.73948861180227 | 6.82995945979864  | 3.26580581808678  | C          | -0.91385659510899 | 0.66940824791189  | -0.68446997043330 |
| C  | 4.53745242710529  | 4.76415941366150  | -0.95063642219684 | H          | -0.48543312236450 | -0.00197235434493 | -1.44396191429037 |
| C  | 3.27824403589049  | 4.07274524498037  | -1.49391675946032 | H          | -1.95955424886606 | 0.85631954455953  | -0.97805569321075 |
| C  | 3.99843406805440  | 5.77273469357177  | 0.04721470381931  | C          | -0.85167840924810 | 0.03702145237359  | 0.72491013895568  |
| C  | 2.08381318411496  | 4.66394133339809  | -0.91107655528723 | C          | -1.61026682560846 | 4.08202572105538  | -0.09743168697158 |
| C  | 2.47850225994626  | 5.82792860753973  | -0.02483371949740 | H          | -2.44587459712206 | 3.69095134149572  | -0.70398631451085 |
| H  | 1.27181342357282  | 4.81395397164532  | -1.63844194224713 | H          | -1.04963458599982 | 4.78026624494018  | -0.73866855693259 |
| H  | 2.23043905020756  | 6.82688919428092  | -0.42758284463016 | H          | -2.02706445204801 | 4.63524558525395  | 0.75238559301063  |
| O  | 3.33503514588359  | 3.20643922126536  | -2.35719792988041 | C          | -2.24211166161557 | -0.33872370976219 | 1.26350782528620  |
| O  | 4.67803348790517  | 6.43545425171133  | 0.79484696312219  | H          | -2.87019192659918 | 0.57121328750123  | 1.20948426183526  |
| C  | 5.52618143620805  | 3.81485820743659  | -0.28889756385405 | C          | -2.88656757353330 | -1.40900252893080 | 0.38642615316267  |
| H  | 6.35937534248299  | 4.38607589614124  | 0.14637538640303  | H          | -2.95385036163203 | -1.09860181723334 | -0.66703109988176 |
| H  | 5.04244269608746  | 3.23663445284440  | 0.51185563512643  | H          | -3.90587003072687 | -1.64135228586353 | 0.73227580849743  |
| H  | 5.93034632661726  | 3.10846360192830  | -1.02770564845768 | H          | -2.29974728307668 | -2.34254045383646 | 0.42285422207345  |
|    |                   |                   |                   | C          | -2.20947635749010 | -0.80479812699270 | 2.71568228671979  |

|    |                   |                   |                   |            |                   |                   |                   |
|----|-------------------|-------------------|-------------------|------------|-------------------|-------------------|-------------------|
| H  | -1.49971937686516 | -1.63988935253485 | 2.84427617034039  | H          | 4.70457155464961  | 6.89690491939044  | -1.45440268058837 |
| H  | -3.20239188308931 | -1.16241711631243 | 3.02988124107647  | H          | 5.66223165383422  | 5.84203551208711  | -0.38361577926881 |
| H  | -1.91577169015708 | -0.00331367920882 | 3.40952364191911  | H          | 5.14843549391228  | 5.24197398951469  | -1.98088419720005 |
| C  | 2.51687495515676  | 0.53750870918893  | 1.57773075298960  | C          | 2.40367388305171  | 5.22270609153737  | -1.55372168949035 |
| C  | 3.73201974055298  | -0.11518402905286 | 3.67629175838593  | H          | 2.72052922142867  | 4.45372000765997  | -2.27683211575777 |
| O  | 3.30886621209565  | 0.00348197783888  | 0.80586559607127  | H          | 1.51250470442255  | 4.82343523264566  | -1.03956915570742 |
| H  | -0.01653893750799 | 0.61815475682525  | 2.67706259831565  | C          | 2.05381771310014  | 6.49010483461744  | -2.27842453940927 |
| H  | -0.19089999472095 | 2.47364067847743  | -1.71207339584227 | C          | 0.98447151374773  | 7.29206184371791  | -1.86000187124350 |
| N  | 2.63856053684645  | 0.50882345196430  | 2.92138415362382  | C          | 2.78090340430285  | 6.89297273982255  | -3.40761306738319 |
| H  | 1.99451019248137  | 1.09096440865062  | 3.44573852329781  | C          | 0.66233036706072  | 8.47013005664065  | -2.53317976885833 |
| C  | 3.82261616893983  | -1.60458370528971 | 3.33594745232576  | H          | 0.38297779437269  | 6.98093282088882  | -1.00185390934710 |
| C  | 5.05421719579205  | 0.59193013204964  | 3.36485649228936  | C          | 2.46555830798115  | 8.07152325285752  | -4.08193665618970 |
| C  | 3.38886451837354  | 0.04931336214870  | 5.15444248090751  | H          | 3.60021510516140  | 6.26623046886606  | -3.76908924315038 |
| H  | 4.17495085535978  | -0.40158107386689 | 5.77684801442047  | C          | 1.40691784111227  | 8.86803980804577  | -3.64365315780811 |
| H  | 3.30925518182705  | 1.11404109696688  | 5.42355216895588  | H          | -0.17930452128592 | 9.07795330785385  | -2.19087512358735 |
| H  | 2.43351057889384  | -0.44383613897158 | 5.39261684514262  | H          | 3.04582053069433  | 8.36600638757457  | -4.96039715575203 |
| H  | 5.87890744702385  | 0.12382664391694  | 3.92352339742181  | H          | 1.15583606216830  | 9.79068584881245  | -4.17324480799513 |
| H  | 5.28027919072157  | 0.53303994389546  | 2.29126665427806  | N          | 2.53597298743355  | 3.93922177210885  | 4.46792952376660  |
| H  | 5.00195297212757  | 1.65285208408647  | 3.65470284297540  | H          | 3.34087943510079  | 3.63185706995269  | 3.93882631120708  |
| H  | 4.61186709366094  | -2.07795806581929 | 3.93922347263174  | H          | 2.31921653561698  | 3.35550703714121  | 5.26629596902634  |
| H  | 2.86851555963125  | -2.1073480627524  | 3.55771766461669  |            |                   |                   |                   |
| H  | 4.05500514901645  | -1.74792696071977 | 2.27303314426142  | <b>CR8</b> |                   |                   |                   |
| Rh | 1.25593441332718  | 3.32741732607774  | 1.26443592978151  | H          | -0.25550173630629 | -0.90333189661784 | 0.71715711101875  |
| C  | 1.67131496808832  | 5.17622371558793  | 2.55381172698511  | C          | -0.90333996069236 | 2.91192193207619  | 0.43902420121262  |
| C  | 0.56895383184534  | 5.85261121658868  | 1.98781349313617  | C          | -0.32457259845244 | 2.02397296621311  | -0.65139520495828 |
| C  | -0.66755595418304 | 5.91942767139653  | 2.62834768522328  | C          | 1.11749769415950  | 1.89717738903498  | -0.21755840979941 |
| C  | -0.83549248674406 | 5.26242390358185  | 3.84530725591267  | H          | 1.94639089675897  | 1.92149313345349  | -0.93030116780559 |
| C  | 0.21293210784599  | 4.55227042806379  | 4.41618305012241  | C          | 1.24712039173134  | 1.30597976514287  | 1.05910086790715  |
| C  | 1.48329163844968  | 4.50838633317220  | 3.80860845655240  | C          | -0.09952934287805 | 0.99326087901440  | 1.70027397303012  |
| H  | 0.71032893366252  | 6.40100037750424  | 1.05684897072728  | C          | -0.76327960689588 | 2.35826549038149  | 1.70359225525345  |
| H  | -1.48783891227360 | 6.47704283164236  | 2.17365967757875  | H          | -1.29694902800689 | 2.74289844837401  | 2.57695828320958  |
| H  | -1.79923629842804 | 5.29661930788841  | 4.35997436136524  | C          | -1.02233965934394 | 0.64788547175914  | -0.60513057890177 |
| H  | 0.07737990953969  | 4.04405509936129  | 5.37453356239563  | H          | -0.59578688869593 | 0.00186206447390  | -1.38745596840920 |
| C  | 3.55833895276094  | 5.30682665595906  | -0.51923012361003 | H          | -2.08551034021243 | 0.79297358003779  | -0.85677868752726 |
| C  | 3.18595312367344  | 6.10194995062310  | 0.71914892043603  | C          | -0.87993888273208 | 0.00501468922825  | 0.79410954098430  |
| C  | 3.79179232440310  | 3.89070797210462  | 0.02449152290908  | C          | -1.80445265333049 | 4.04050080932201  | 0.06403536036025  |
| C  | 3.06949754689689  | 5.19051297934711  | 1.94195216189213  | H          | -2.64416186870308 | 3.64591789468444  | -0.53441403711413 |
| C  | 3.32568329820094  | 3.79519352097751  | 1.39425428555776  | H          | -1.28171816454108 | 4.77799691426681  | -0.56585564627147 |
| H  | 3.80459215208270  | 5.55649745265099  | 2.68603519072843  | H          | -2.21411500441525 | 4.55268448233756  | 0.94304795764851  |
| H  | 3.83470071013622  | 3.04402648715321  | 2.01073775003254  | C          | -2.23514416493158 | -0.41679970460565 | 1.38601930614288  |
| O  | 3.04924944759398  | 7.30231908037286  | 0.75619015173497  | H          | -2.89513469104910 | 0.47139881981733  | 1.35506369197533  |
| O  | 4.30757727262489  | 3.01569600342899  | -0.66325943231541 | C          | -2.87503227441530 | -1.51005750184062 | 0.53418745044329  |
| C  | 4.84628889701814  | 5.85913325843098  | -1.12239844336542 | H          | -2.99213392016390 | -1.20412154856281 | -0.51626696469452 |

|    |                   |                   |                   |            |                   |                   |                   |
|----|-------------------|-------------------|-------------------|------------|-------------------|-------------------|-------------------|
| H  | -3.87214797167140 | -1.77695179470731 | 0.91784646078488  | O          | 2.94022427647574  | 7.33534253727262  | 1.00611926454816  |
| H  | -2.25518807486548 | -2.42261568353105 | 0.54899204101211  | O          | 4.03652712296551  | 3.10796489716041  | -0.76272966979091 |
| C  | -2.13321851063980 | -0.87832343891372 | 2.83626439260910  | C          | 2.66608014092118  | 5.73222094176042  | -1.52647531740334 |
| H  | -1.39724135317183 | -1.69412969700596 | 2.93918584440284  | H          | 3.01158416452338  | 5.18978230956340  | -2.41898863551235 |
| H  | -3.10337431375644 | -1.26165330362330 | 3.18911439903912  | H          | 1.64406034274352  | 5.39411146756952  | -1.29088165898814 |
| H  | -1.8345533871572  | -0.06740427165212 | 3.51683874203349  | H          | 2.63649537931232  | 6.80875305173213  | -1.75150378760344 |
| C  | 2.46863958471222  | 0.53497224958145  | 1.47183462969764  | C          | 5.05101379912958  | 5.90959045347315  | -0.69466396412471 |
| C  | 4.00397878316094  | 0.04296695824576  | 3.38695618968274  | H          | 5.38637921042304  | 5.30527465066625  | -1.55188005818627 |
| O  | 3.00639242829300  | -0.24072601153100 | 0.68411342750663  | H          | 5.00829014899304  | 6.96205841290153  | -1.01490194628867 |
| H  | 0.03662095513875  | 0.59785057227048  | 2.71336809064570  | C          | 6.00246562661659  | 5.76005097146278  | 0.46445435867794  |
| H  | -0.41996650477867 | 2.49149707098062  | -1.64056830707157 | C          | 6.24474917332765  | 6.83585948246678  | 1.32880286719992  |
| N  | 2.86511422685060  | 0.71726795378179  | 2.74745169535923  | C          | 6.61617925867057  | 4.53083591845662  | 0.74439572789294  |
| H  | 2.44317756208029  | 1.49566432574409  | 3.25279496802190  | C          | 7.06294941779702  | 6.68696708484937  | 2.44847893932984  |
| C  | 3.77130516535575  | -1.46960426410418 | 3.39447885291826  | H          | 5.77862002150220  | 7.80310204524856  | 1.12227189725176  |
| C  | 5.30406970527113  | 0.38730425297251  | 2.65322360294162  | C          | 7.43229731406991  | 4.37777505377128  | 1.86426374696502  |
| C  | 4.07469249951787  | 0.55505899163649  | 4.82266675180074  | H          | 6.44213459610516  | 3.68241483467072  | 0.07830065942290  |
| H  | 4.89420586666057  | 0.05424574885921  | 5.35780859692346  | C          | 7.65585318843821  | 5.45469067191438  | 2.72332577973528  |
| H  | 4.26227700902600  | 1.63858213120200  | 4.84587428973185  | H          | 7.23819701097660  | 7.53998800430221  | 3.10931173718728  |
| H  | 3.13584152207340  | 0.35243640322583  | 5.36162095418689  | H          | 7.89926715439381  | 3.40980261140885  | 2.06522418696294  |
| H  | 6.15687866460873  | -0.11086619147589 | 3.13900176882428  | H          | 8.29604174776363  | 5.33533466434475  | 3.60121783602023  |
| H  | 5.25417973594331  | 0.05893124640942  | 1.60651728565842  | N          | 2.42736895373971  | 3.62848437719859  | 4.42205161757730  |
| H  | 5.48392318621641  | 1.47376773310822  | 2.67227556642854  | H          | 3.37817549358203  | 3.89687402060779  | 4.19617741815379  |
| H  | 4.61009432338048  | -1.97741928229014 | 3.89416584450426  | H          | 2.31082022042139  | 3.37051942548738  | 5.39515012739629  |
| H  | 2.84570883910604  | -1.71183890824978 | 3.93936525086213  |            |                   |                   |                   |
| H  | 3.68607575461532  | -1.85485409733636 | 2.37000443114002  | <b>CR9</b> |                   |                   |                   |
| Rh | 1.14153929487202  | 3.35264331034325  | 1.28097180265478  | H          | 0.86711178475527  | -0.58668190331236 | 0.78062729012967  |
| C  | 1.61598577603900  | 5.12110426498993  | 2.66561985940778  | C          | -0.47547141419354 | 2.94876777397244  | 1.61317425162803  |
| C  | 0.51489967767093  | 5.81408555814912  | 2.11592266599390  | C          | -1.01983622179873 | 2.03514438588136  | 0.52881311600636  |
| C  | -0.72572747391221 | 5.84977839442020  | 2.75603722255512  | C          | -0.02348391805921 | 2.24596128855495  | -0.58475936335708 |
| C  | -0.89886693914382 | 5.14379303581836  | 3.94264879569134  | H          | -0.35426334314902 | 2.27115659388506  | -1.62780649989405 |
| C  | 0.14431893088952  | 4.39578906120803  | 4.47744280509763  | C          | 1.29261384689013  | 1.86472510529543  | -0.22743052404213 |
| C  | 1.40992344562289  | 4.36663007233971  | 3.86556246370659  | C          | 1.38646330691825  | 1.43506992637787  | 1.22299708676066  |
| H  | 0.65837685932172  | 6.40137912821996  | 1.20768033078298  | C          | 0.83577549461625  | 2.63958260790112  | 1.94844008271493  |
| H  | -1.54412624069066 | 6.42717441688895  | 2.32304805859424  | H          | 1.31496718452176  | 3.04522207254964  | 2.84507392846905  |
| H  | -1.86142870227154 | 5.16429473608136  | 4.45989162926165  | C          | -0.96139240395708 | 0.57258789706803  | 1.02687881041420  |
| H  | 0.00196801630535  | 3.83506488035615  | 5.40501561729547  | H          | -1.33555737805101 | -0.09518282453102 | 0.23602592838428  |
| C  | 3.60904303311958  | 5.45421042619709  | -0.36194721240181 | H          | -1.65562214033384 | 0.47826369216234  | 1.87751628815686  |
| C  | 3.15056555458050  | 6.14920697303159  | 0.90880689943205  | C          | 0.47612683193440  | 0.19734138922943  | 1.45193312132733  |
| C  | 3.64322414995047  | 3.97044368004743  | 0.02065065756747  | C          | -1.41382343103627 | 3.72188977476217  | 2.47358731334452  |
| C  | 3.01173520093945  | 5.14764430655491  | 2.04983534778086  | H          | -2.02478659287499 | 3.00854397770202  | 3.05469495637477  |
| C  | 3.21176817739296  | 3.79622538499228  | 1.38961155357316  | H          | -2.10383704647131 | 4.33843045091941  | 1.88127513859032  |
| H  | 3.77148153104410  | 5.43106723572232  | 2.80626655426035  | H          | -0.87924757277080 | 4.37038301128480  | 3.17981014276941  |
| H  | 3.69325434408256  | 2.98764540476174  | 1.94766080897369  | C          | 0.54372846403758  | -0.35205415479744 | 2.88611904338450  |



|    |                   |                   |                   |             |                   |                   |                   |
|----|-------------------|-------------------|-------------------|-------------|-------------------|-------------------|-------------------|
| H  | 0.05084865909938  | 0.38769278679173  | 3.54611926135343  | C           | 2.43154261967615  | 5.93221630846229  | -0.02769410197010 |
| C  | -0.22528108776647 | -1.66645636303485 | 2.99316363001924  | H           | 1.35300766648046  | 5.60635790598417  | -2.00663972039305 |
| H  | -1.27268023472224 | -1.56412323658096 | 2.67138255530739  | H           | 2.85287205006734  | 6.93895319807938  | -0.25074412000578 |
| H  | -0.22912015563387 | -2.04025822512879 | 4.02910405192489  | O           | 3.27075882041129  | 3.99726725278904  | -2.93791559864630 |
| H  | 0.24382557695561  | -2.43890894539150 | 2.36018021631503  | O           | 4.05272369830081  | 4.93555725539351  | 1.55646768028375  |
| C  | 1.97574968974522  | -0.54413087829631 | 3.37598826086197  | C           | 5.34778576849997  | 5.45181701028565  | -1.31912437226294 |
| H  | 2.54719638081833  | -1.17841467966936 | 2.67699967533002  | H           | 5.78394393309436  | 5.04044954363109  | -2.24135947753886 |
| H  | 1.98620673295647  | -1.03894515713263 | 4.35970254719641  | H           | 4.90440820809293  | 6.43104049242888  | -1.55515086530658 |
| H  | 2.51544728885699  | 0.40840302555908  | 3.48188934481068  | H           | 6.15042994810009  | 5.59616812712098  | -0.58239613661327 |
| C  | 2.20804846080851  | 1.15283442148510  | -1.18372738653407 | C           | 4.85683020593864  | 3.05547228126361  | -0.54981948278685 |
| C  | 2.69003172721966  | 0.70988076684733  | -3.60410993733644 | H           | 4.23116270403116  | 2.55578938625729  | 0.20403783800969  |
| O  | 2.94862560326735  | 0.26730304871925  | -0.75357691567825 | H           | 4.71322971995303  | 2.50827015872173  | -1.49006546293841 |
| H  | 2.42804035017168  | 1.21947698587923  | 1.48138815504936  | C           | 6.30760563398800  | 2.95040345643511  | -0.16319754297200 |
| H  | -2.03853964818770 | 2.32074859582220  | 0.23413401898384  | C           | 7.25268615643104  | 2.54072480745841  | -1.11229176752949 |
| N  | 2.07031588596080  | 1.43845492168257  | -2.48905144592917 | C           | 6.75243632423050  | 3.23964002506890  | 1.13403933902266  |
| H  | 1.59892411053949  | 2.30412960074672  | -2.72386453931038 | C           | 8.60334365162090  | 2.42484711759427  | -0.78163131141049 |
| C  | 4.21628503250276  | 0.81867605300919  | -3.56038243911207 | H           | 6.92044604267175  | 2.30329795399587  | -2.12725216167419 |
| C  | 2.25719394009226  | -0.75792185569747 | -3.55933164469050 | C           | 8.10081238555502  | 3.12471215730167  | 1.46888288222737  |
| C  | 2.16468525805230  | 1.36241233772614  | -4.88059693540255 | H           | 6.02581180783053  | 3.57037478465890  | 1.87893352726015  |
| H  | 2.59385313220513  | 0.86670827506737  | -5.76323020895490 | C           | 9.03268523463980  | 2.71706469435126  | 0.51244321078590  |
| H  | 1.06762069501566  | 1.28160428368976  | -4.93891934516221 | H           | 9.32221832218974  | 2.10072841777827  | -1.53895073394216 |
| H  | 2.44093424265874  | 2.42715914166833  | -4.90772296817491 | H           | 8.42784895626641  | 3.35310269941005  | 2.48700368712653  |
| H  | 2.68041718738100  | -1.30038010319214 | -4.41827232570586 | H           | 10.08943740962238 | 2.62495209213016  | 0.77655854135414  |
| H  | 2.60586274162422  | -1.23745087845752 | -2.63498274146569 | N           | 2.35114312537639  | 6.42919932532489  | 3.00636313911458  |
| H  | 1.15997519753440  | -0.83789937130384 | -3.60499413914763 | H           | 3.15716837482300  | 5.90941422990285  | 2.65494783682002  |
| H  | 4.65679822505357  | 0.27497680224542  | -4.41007194291897 | H           | 2.28195686552717  | 6.59220195412815  | 4.00219860799215  |
| H  | 4.51716248368323  | 1.87388912245215  | -3.61805172770429 |             |                   |                   |                   |
| H  | 4.60824587638807  | 0.38848020822546  | -2.62891510411483 | <b>CR10</b> |                   |                   |                   |
| Rh | 0.95428515650001  | 3.93119550014940  | 0.19338833391305  | H           | 0.69632913021482  | -0.67300599255445 | 0.77045210260580  |
| C  | 1.18732340478680  | 6.10744549506056  | 0.87730868925865  | C           | -0.56388705816515 | 2.88835480485107  | 1.61430142594215  |
| C  | -0.04746104402152 | 6.29119916971627  | 0.19094476445508  | C           | -1.11498061318722 | 2.00598949449654  | 0.50893585554582  |
| C  | -1.21115332987378 | 6.72415312582795  | 0.82106362763062  | C           | -0.09810971968167 | 2.20067698359688  | -0.5887051061780  |
| C  | -1.15982162990216 | 7.03652829377759  | 2.17750330653042  | H           | -0.41596755216880 | 2.24183976419847  | -1.63523846805089 |
| C  | 0.02405635062675  | 6.90249463037583  | 2.88379401764244  | C           | 1.19969662378953  | 1.77882034691688  | -0.21400633833176 |
| C  | 1.21757934365058  | 6.45620046569769  | 2.27462028710907  | C           | 1.26245288017599  | 1.33457780089220  | 1.23362075790332  |
| H  | -0.07426490410817 | 6.18098394449344  | -0.89137369325391 | C           | 0.73340528136385  | 2.54418150234516  | 1.96692533852286  |
| H  | -2.13049394201859 | 6.84576657031708  | 0.24557437834337  | H           | 1.20664009424834  | 2.92465092268172  | 2.87762391469591  |
| H  | -2.05393391569481 | 7.39226626377285  | 2.69661449071242  | C           | -1.10382546765000 | 0.53613597326748  | 0.98886835686887  |
| H  | 0.05992390491324  | 7.15922105402601  | 3.94598508787231  | H           | -1.47910507497915 | -0.11165565177151 | 0.18202332007842  |
| C  | 4.29083786005626  | 4.46766049049354  | -0.78920534319673 | H           | -1.81681251165119 | 0.44872729646538  | 1.82456301964314  |
| C  | 3.14998973890953  | 4.46396401328291  | -1.81228892330399 | C           | 0.31505029836138  | 0.11989147464195  | 1.43755008455227  |
| C  | 3.63173214285882  | 5.08413775530120  | 0.42569865967131  | C           | -1.50423373301798 | 3.66200105339811  | 2.47150552927564  |
| C  | 1.99913703698036  | 5.13671433096141  | -1.25786480125654 | H           | -2.15937308874464 | 2.94663593724015  | 2.99984866984668  |

|    |                   |                   |                   |             |                   |                   |                   |
|----|-------------------|-------------------|-------------------|-------------|-------------------|-------------------|-------------------|
| H  | -2.15330708114993 | 4.32543190222800  | 1.88281491481593  | C           | 3.02017931883816  | 4.38035236169634  | -1.94031857460426 |
| H  | -0.97368031474702 | 4.26033895968965  | 3.22233870178492  | C           | 3.80174064135002  | 5.25142146385124  | 0.14179554804625  |
| C  | 0.33964812940668  | -0.43577685116903 | 2.87080706058745  | C           | 1.90637111851605  | 5.01267695700614  | -1.27152273791434 |
| H  | -0.14826230453561 | 0.31460656916037  | 3.52237328768266  | C           | 2.43943062486147  | 5.88248176914499  | -0.13327907816010 |
| C  | -0.46358208863417 | -1.73102369360659 | 2.95807898664292  | H           | 1.17100131817803  | 5.44058936898235  | -1.96267085827744 |
| H  | -1.50144256833975 | -1.60231137695315 | 2.61539374823715  | H           | 2.70957544512984  | 6.91387268856459  | -0.45326633127470 |
| H  | -0.49782138546029 | -2.10716758319505 | 3.99262088977519  | O           | 3.02808301888082  | 3.88236772675587  | -3.06110443099804 |
| H  | -0.00072411851094 | -2.51325171067985 | 2.3325564838202   | O           | 4.49023529861692  | 5.37229698909109  | 1.13486599362044  |
| C  | 1.75556835087014  | -0.66430742359404 | 3.39036803346530  | C           | 4.88071672053443  | 3.14433436283359  | -0.68302114711833 |
| H  | 2.32540531486808  | -1.31265537581707 | 2.70305214684802  | H           | 5.73833875239899  | 3.30937990042274  | -0.01472966985671 |
| H  | 1.73288291276564  | -1.15951183005353 | 4.37372074409365  | H           | 4.15041975629211  | 2.51096237879566  | -0.16096854341979 |
| H  | 2.31667136483645  | 0.27438024931667  | 3.50827359291863  | H           | 5.22714004529820  | 2.60825730495306  | -1.57669963477095 |
| C  | 2.12723212649041  | 1.06312538470101  | -1.15604619757611 | C           | 5.34263122155026  | 5.32696147033984  | -1.83198063134969 |
| C  | 2.60597261449575  | 0.56639788014283  | -3.56606732991716 | H           | 6.26156364479687  | 5.31944423565168  | -1.22602140233643 |
| O  | 2.89769446333904  | 0.21170446872023  | -0.70775155250261 | H           | 5.55197390838142  | 4.78805369073966  | -2.76933282400482 |
| H  | 2.29424669316778  | 1.08688824558733  | 1.50145703701602  | C           | 4.92956749520011  | 6.74484914446008  | -2.11614312973165 |
| H  | -2.12137459719635 | 2.32304081424821  | 0.20397678225361  | C           | 4.12623763003533  | 7.05784944131299  | -3.22098824153826 |
| N  | 1.97030014012878  | 1.30574214058287  | -2.46773859784979 | C           | 5.29593748659530  | 7.77680262366184  | -1.24215729139272 |
| H  | 1.48392157877241  | 2.15700275375854  | -2.72407821156629 | C           | 3.68896805950784  | 8.36399817938929  | -3.43691556752020 |
| C  | 4.12632424552059  | 0.73778704462781  | -3.54133182760237 | H           | 3.83846020621592  | 6.26387447274983  | -3.91440748098835 |
| C  | 2.23138193185581  | -0.91482413729020 | -3.47063696849183 | C           | 4.86060749816062  | 9.08428141339491  | -1.45590113810444 |
| C  | 2.04131545574989  | 1.15484493464399  | -4.85715031853505 | H           | 5.92738697763143  | 7.54836203844727  | -0.37885947021693 |
| H  | 2.48294627431614  | 0.64857708259217  | -5.72761485124586 | C           | 4.05102832243918  | 9.38103716835831  | -2.55254584100045 |
| H  | 0.94823873751193  | 1.02549917481394  | -4.90104981372464 | H           | 3.06275615003783  | 8.58968094575127  | -4.30407664060759 |
| H  | 2.27103840855306  | 2.22879519835135  | -4.92213415346746 | H           | 5.15684033844415  | 9.87558088118540  | -0.76237495880639 |
| H  | 2.66669605297608  | -1.46653443974982 | -4.3175377757180  | H           | 3.70841079139031  | 10.40507722388247 | -2.72170831135168 |
| H  | 2.60688403020223  | -1.35212848961023 | -2.53604750974566 | N           | 2.61849780697375  | 5.85353855943774  | 3.00937200740845  |
| H  | 1.13765244775732  | -1.03791885756900 | -3.50209591398882 | H           | 3.48706091819783  | 5.74770324714952  | 2.48225628664073  |
| H  | 4.58272176407599  | 0.18013761405288  | -4.37351759893772 | H           | 2.67880863246698  | 6.10597949189959  | 3.98675523859374  |
| H  | 4.38202633162685  | 1.80173289631202  | -3.64097718795779 |             |                   |                   |                   |
| H  | 4.54106440646054  | 0.36079602119294  | -2.59653571709583 | <b>CR11</b> |                   |                   |                   |
| Rh | 0.92199339989449  | 3.84604695106776  | 0.22207321692341  | H           | -0.16139495900495 | -0.83886494630103 | 0.87835658241504  |
| C  | 1.31994269840672  | 5.99216360993885  | 0.92952995378721  | C           | -0.54841230544490 | 2.93979480701789  | 0.09626126842269  |
| C  | 0.04900871335782  | 6.32239947381900  | 0.37594792172927  | C           | 0.13925517230616  | 1.90650974845058  | -0.78484998096876 |
| C  | -1.02823118664822 | 6.75242671959812  | 1.14092618943781  | C           | 1.48998842569375  | 1.77147368414416  | -0.11206684317233 |
| C  | -0.85432501861535 | 6.88881520069707  | 2.51815666532660  | H           | 2.40640445293307  | 1.67634839448712  | -0.70206385197169 |
| C  | 0.35812667855870  | 6.57464018467559  | 3.10601504218408  | C           | 1.38778835552681  | 1.32655533488296  | 1.22529620240844  |
| C  | 1.47141940998054  | 6.13209729961835  | 2.35419953495931  | C           | -0.05094976194881 | 1.14777456568655  | 1.66422580101842  |
| H  | -0.06041409086439 | 6.33449278284158  | -0.70795444087411 | C           | -0.62927035749103 | 2.52689702843382  | 1.41895063887088  |
| H  | -1.97533723360022 | 7.00615248366893  | 0.66164175711242  | H           | -1.27051594525783 | 3.02586254044962  | 2.15000391270769  |
| H  | -1.67702594003485 | 7.24051576155923  | 3.14646978155790  | C           | -0.63828121035132 | 0.57734931649340  | -0.70720225193529 |
| H  | 0.48677563551629  | 6.68279684971509  | 4.18639691355958  | H           | -0.14124429243265 | -0.16913548157492 | -1.34529827708617 |
| C  | 4.27794726104633  | 4.48685845678931  | -1.07748804987593 | H           | -1.64187888853627 | 0.74156524244336  | -1.13183778800575 |

|    |                   |                   |                   |             |                   |                   |                   |
|----|-------------------|-------------------|-------------------|-------------|-------------------|-------------------|-------------------|
| C  | -0.74097347398089 | 0.09387979069660  | 0.75684541688813  | H           | -1.89699470751351 | 5.42340746000477  | 3.94622713361610  |
| C  | -1.33249528251023 | 4.05303692358610  | -0.51592081293348 | H           | -1.63561721725249 | 6.87812520888805  | 1.96994260364482  |
| H  | -2.15239080987035 | 3.62815722679816  | -1.12155476127287 | C           | 3.67618993682500  | 4.99371647585448  | -0.88581557108116 |
| H  | -0.71655396980554 | 4.65985105264659  | -1.19704942837249 | C           | 3.23514532848502  | 6.09318655674716  | 0.05723178247054  |
| H  | -1.76950571227787 | 4.70993097809885  | 0.24734043579907  | C           | 3.88998934694113  | 3.80342667695733  | 0.04997565794333  |
| C  | -2.19004721078573 | -0.21064461296463 | 1.16924881049095  | C           | 2.96087491827028  | 5.55217919170591  | 1.46449409155016  |
| H  | -2.78939687103536 | 0.69250947877333  | 0.94426274795318  | C           | 3.37051220027225  | 4.08828874037032  | 1.36109407108071  |
| C  | -2.75047629285062 | -1.36565050717440 | 0.34299446357068  | H           | 3.59537786369261  | 6.16991284211567  | 2.12958721842563  |
| H  | -2.69051681662004 | -1.17113502949393 | -0.73838928219771 | H           | 3.83789404987842  | 3.58225626168171  | 2.21176022510261  |
| H  | -3.80697297091077 | -1.55307429494550 | 0.59076816779829  | O           | 3.20277538640448  | 7.26642931323005  | -0.24567680730892 |
| H  | -2.18906976974962 | -2.29329291592352 | 0.54666155873788  | O           | 4.43125785760106  | 2.76363961344093  | -0.34386965470810 |
| C  | -2.33323128399340 | -0.51337047600499 | 2.65707154985225  | C           | 4.97402531161756  | 5.36208611092669  | -1.59504397246360 |
| H  | -1.66298291739205 | -1.33675670776657 | 2.95738916652390  | H           | 4.83459187401992  | 6.26301220074424  | -2.20784701826298 |
| H  | -3.36393039199487 | -0.82213920890056 | 2.89170689596362  | H           | 5.77549265062255  | 5.55715951251985  | -0.86662236422406 |
| H  | -2.09863649770129 | 0.35734745778840  | 3.28693731280011  | H           | 5.29012679936343  | 4.53192500875416  | -2.24260964483393 |
| C  | 2.45456012007564  | 0.65686594093648  | 2.04296165170634  | C           | 2.53879718715905  | 4.63161774371703  | -1.88243751205705 |
| C  | 4.89300175802664  | 0.23356301328030  | 2.31720063193178  | H           | 2.83227695312761  | 3.66794442397633  | -2.32820936393738 |
| O  | 2.12629605160639  | 0.02599181502743  | 3.05129257983402  | H           | 1.62270855186843  | 4.44399249034625  | -1.29679139424973 |
| H  | -0.08108240004896 | 0.85557664243767  | 2.71780411620042  | C           | 2.26056557386988  | 5.62836529150522  | -2.97042891322663 |
| H  | 0.23429932128153  | 2.25944432153677  | -1.8205699919716  | C           | 1.29272112346250  | 6.62753251416164  | -2.80559547214873 |
| N  | 3.72282919041351  | 0.77350567146213  | 1.61187255781976  | C           | 2.95647869480567  | 5.56872506294224  | -4.18559923202156 |
| H  | 3.92613550684970  | 1.42430134531860  | 0.84258879891654  | C           | 1.03405297949061  | 7.54653897490779  | -3.82184784867093 |
| C  | 5.00453897870504  | 0.85361496834536  | 3.71365260601103  | H           | 0.73913256843102  | 6.68533277193008  | -1.86448099770633 |
| C  | 4.79710580721132  | -1.29127986425907 | 2.41016317323693  | C           | 2.70269031786336  | 6.48774733472651  | -5.20285396108490 |
| C  | 6.12142278089848  | 0.61263667987277  | 1.49222520845574  | H           | 3.70233820363506  | 4.78368614194515  | -4.33790511808562 |
| H  | 7.02926726036792  | 0.22347154133969  | 1.97558637356600  | C           | 1.74042111209445  | 7.48234347957100  | -5.02333372451248 |
| H  | 6.06054257401514  | 0.18876586547736  | 0.47785819021994  | H           | 0.27206826846540  | 8.31682309250768  | -3.67521643517868 |
| H  | 6.21508473193734  | 1.70452083273763  | 1.39877476690830  | H           | 3.25481898148098  | 6.42232106222735  | -6.14412242760747 |
| H  | 5.68971849754129  | -1.69484695408911 | 2.91211524908261  | H           | 1.53649045748362  | 8.20125782751824  | -5.82111825119386 |
| H  | 3.90645121176644  | -1.59234663219795 | 2.97664064676677  | N           | 0.49944257536619  | 7.22454109236099  | 0.54894479252374  |
| H  | 4.73858330186964  | -1.73265812117035 | 1.40298181549785  | H           | -0.27407692487794 | 7.86595431635744  | 0.42715720057398  |
| H  | 5.89251045995680  | 0.46302197644610  | 4.23372953246264  | H           | 1.40906352507537  | 7.59236817534166  | 0.28684578191085  |
| H  | 5.10158415784503  | 1.94806883948663  | 3.64052261631166  |             |                   |                   |                   |
| H  | 4.11424100460853  | 0.61890838047151  | 4.31207868392390  | <b>CR12</b> |                   |                   |                   |
| Rh | 1.35263481920757  | 3.43345346799912  | 1.15873921608436  | H           | -0.06670563263508 | -0.82434912642258 | 0.79851796790053  |
| C  | 1.51741459051675  | 5.53919465601581  | 2.01189414349034  | C           | -1.04052099122426 | 2.92285077058925  | 0.54731772449939  |
| C  | 1.34407361514803  | 4.74462815014166  | 3.18590330062141  | C           | -0.34090280628233 | 2.10724808110894  | -0.53003961495689 |
| C  | 0.13849731526692  | 4.69564863425722  | 3.88583605841817  | C           | 1.08994837608244  | 2.10359633235025  | -0.03511633355832 |
| C  | -0.93792690977631 | 5.45081127595338  | 3.42247830738192  | H           | 1.92825314316724  | 2.21717835055080  | -0.72841885751847 |
| C  | -0.79703634043133 | 6.26378122437815  | 2.30837000434551  | C           | 1.22218715670006  | 1.50162160525107  | 1.23718395517119  |
| C  | 0.42059811133317  | 6.36472480220649  | 1.60202653415999  | C           | -0.11135834765127 | 1.06274348884884  | 1.80825881980241  |
| H  | 2.21520668124988  | 4.24691515090729  | 3.61569203549522  | C           | -0.89479115792515 | 2.36072306323244  | 1.80870320869699  |
| H  | 0.05394157992810  | 4.08310134142634  | 4.78530720170212  | H           | -1.49791918497974 | 2.67788075997455  | 2.66357602341749  |

|    |                   |                   |                   |             |                   |                   |                   |
|----|-------------------|-------------------|-------------------|-------------|-------------------|-------------------|-------------------|
| C  | -0.91133763064608 | 0.6747693329071   | -0.53776654229696 | C           | -0.40295817404682 | 6.21651499669396  | 2.30672137042849  |
| H  | -0.39260181620879 | 0.08697657258699  | -1.31048628078237 | H           | 1.98507501216125  | 4.31312457349202  | 3.86975607007328  |
| H  | -1.97090008876017 | 0.72780217087061  | -0.83627845417887 | H           | 0.07368466671661  | 3.68652722842908  | 5.28745742017399  |
| C  | -0.76908511425417 | 0.02656233337110  | 0.85767992071738  | H           | -2.17206777892929 | 4.72366759981967  | 4.84059765685302  |
| C  | -2.02705560472498 | 3.97689318015594  | 0.17017179530825  | H           | -2.44034851614059 | 6.32943546018902  | 2.98866242077911  |
| H  | -2.81227267445332 | 3.53129970227571  | -0.46535235346173 | C           | 2.77983220707159  | 5.67826818463411  | -0.65960220806466 |
| H  | -1.55667994082964 | 4.78126682364423  | -0.41727984212978 | C           | 2.19324485942207  | 6.56335929401763  | 0.42237841659651  |
| H  | -2.50273684398586 | 4.42163724176711  | 1.05378718926676  | C           | 3.19200213765274  | 4.41877863633917  | 0.09328209820764  |
| C  | -2.10661436252213 | -0.51868184480456 | 1.38448765089498  | C           | 2.20536441382502  | 5.87097184956480  | 1.78400045479881  |
| H  | -2.83762369188829 | 0.31133199382429  | 1.33661476636907  | C           | 2.80696323281210  | 4.50471637061498  | 1.47631161797806  |
| C  | -2.61406868490526 | -1.64738047708907 | 0.49025081892557  | H           | 2.83327063320458  | 6.52585077448296  | 2.42106527829628  |
| H  | -2.71419819365016 | -1.33411883440685 | -0.55986011705202 | H           | 3.44037167463173  | 3.99767058610222  | 2.21132417882283  |
| H  | -3.59891059623688 | -2.00744761668652 | 0.82681067960433  | O           | 1.83388956099380  | 7.70329142258825  | 0.21825538631750  |
| H  | -1.91783136373336 | -2.50284425855823 | 0.51777151925897  | O           | 3.78551329803201  | 3.49374271012412  | -0.47682674974509 |
| C  | -2.02622458838173 | -0.99434844620889 | 2.83107977593247  | C           | 1.73231309985588  | 5.40048520339149  | -1.73747887258489 |
| H  | -1.23117506935921 | -1.74973169584718 | 2.95279936496554  | H           | 2.14804200038365  | 4.70532443600463  | -2.48175305106356 |
| H  | -2.97576909413960 | -1.45914536461585 | 3.13949231818333  | H           | 0.83094742359192  | 4.94153617943863  | -1.30223424728509 |
| H  | -1.81872565205701 | -0.17270603207958 | 3.53209020351118  | H           | 1.44692812871109  | 6.33549494807763  | -2.24152549360830 |
| C  | 2.46472704455297  | 0.91026021175033  | 1.83931547589334  | C           | 4.02545453575902  | 6.34926513248423  | -1.28147958218737 |
| C  | 4.95379785478528  | 0.83013844750956  | 1.78992074023625  | H           | 4.38259596564862  | 5.68546305606016  | -2.08307853667596 |
| O  | 2.35186046196151  | 0.11712605661626  | 2.77832329565480  | H           | 3.69589607039110  | 7.29246505883092  | -1.74410970884380 |
| H  | 0.03577256529347  | 0.65448819644447  | 2.81236207499575  | C           | 5.13234613622946  | 6.60635254909691  | -0.29316500615945 |
| H  | -0.42829885966444 | 2.58268001027737  | -1.51617619220800 | C           | 5.16619755213760  | 7.78600700887661  | 0.46290854079418  |
| N  | 3.64167350175798  | 1.27473158877444  | 1.30230847110345  | C           | 6.13202226657456  | 5.64815894620020  | -0.07709641517449 |
| H  | 3.65486656889729  | 2.02659473623684  | 0.59946734238443  | C           | 6.16201258156083  | 7.99575949335129  | 1.41726539460465  |
| C  | 5.15855757461278  | 1.26540867768378  | 3.24433117113483  | H           | 4.40194876257273  | 8.55034819252413  | 0.29987130673718  |
| C  | 5.07662033442195  | -0.69013121955309 | 1.65738782745781  | C           | 7.12870318472304  | 5.85486701038264  | 0.87545676026542  |
| C  | 6.00621244451661  | 1.50279882180036  | 0.91018456600557  | H           | 6.11640811390996  | 4.72351576515096  | -0.65870225605206 |
| H  | 7.01126020927688  | 1.18949050182786  | 1.22819284086690  | C           | 7.14499432008242  | 7.02890691438790  | 1.62960705216364  |
| H  | 5.87552262796659  | 1.22264398840252  | -0.14661161044554 | H           | 6.17174267525782  | 8.92363527538085  | 1.99520576892614  |
| H  | 5.94273114952447  | 2.59877636613552  | 0.98318128113140  | H           | 7.89837634970615  | 5.09350364990170  | 1.02826828619161  |
| H  | 6.07115914704313  | -1.02151942921382 | 1.99332017645456  | H           | 7.92593172098128  | 7.19311747077606  | 2.37659006723974  |
| H  | 4.31202236816994  | -1.19550466562608 | 2.26190714844449  | N           | -0.63752897349581 | 7.12737912617773  | 1.32650367648588  |
| H  | 4.94918947046411  | -0.99200825012420 | 0.60607587097085  | H           | -1.52690373366953 | 7.60925255693570  | 1.35327984504268  |
| H  | 6.15415384971209  | 0.95607685907986  | 3.59765733393079  | H           | 0.14368168674098  | 7.65763098538143  | 0.95178153568754  |
| H  | 5.08878356382723  | 2.36131691938625  | 3.32883025219639  |             |                   |                   |                   |
| H  | 4.39838963050722  | 0.81345224749236  | 3.89503775431465  | <b>CR13</b> |                   |                   |                   |
| Rh | 0.89509217218920  | 3.57149449995593  | 1.44366345285914  | H           | 0.45613435116951  | -0.64887280673397 | 0.66132667917024  |
| C  | 0.86819122439693  | 5.58103244309970  | 2.50403800595940  | C           | -0.61196364139390 | 2.97342414274211  | 1.53279457399786  |
| C  | 0.99254508431398  | 4.68536621578813  | 3.60992147035019  | C           | -1.05661489646116 | 2.19156212980711  | 0.30718549174311  |
| C  | -0.07375695175679 | 4.36939417498031  | 4.44882269413630  | C           | 0.13508436118536  | 2.34194349167273  | -0.61451301750311 |
| C  | -1.31555578646509 | 4.95608015898744  | 4.20242675024719  | H           | -0.01536415170731 | 2.46706410362154  | -1.69139148347786 |
| C  | -1.47103622988030 | 5.85347465941015  | 3.15958959341505  | C           | 1.31527625248587  | 1.79043913333332  | -0.05987342127237 |

|    |                   |                   |                   |             |                   |                   |                   |
|----|-------------------|-------------------|-------------------|-------------|-------------------|-------------------|-------------------|
| C  | 1.10515994091201  | 1.27415486275075  | 1.34925160613080  | C           | 2.13309258952736  | 5.26485838914653  | 3.39553239720373  |
| C  | 0.56651762854858  | 2.48422690008959  | 2.07624237692365  | C           | 0.97381074527017  | 5.94249997172773  | 3.77071313664333  |
| H  | 0.91929708693807  | 2.77578336082538  | 3.06887344824054  | C           | 0.19388868160559  | 6.60043023156074  | 2.82861741952668  |
| C  | -1.24861045761543 | 0.70934997475570  | 0.69492167325140  | C           | 0.55496040107925  | 6.62267329831491  | 1.46869934880240  |
| H  | -1.55174257483375 | 0.14106098443245  | -0.19771848498422 | H           | 3.47197025531454  | 4.83849515511224  | 1.77572771175479  |
| H  | -2.08481385426517 | 0.64639326908925  | 1.41010390279744  | H           | 2.74205266593573  | 4.73934236214479  | 4.13303207576666  |
| C  | 0.04533039215591  | 0.13919958647263  | 1.31840569034420  | H           | 0.66052555467459  | 5.95090997213889  | 4.81805380253651  |
| C  | -1.59253904984653 | 3.86547996461835  | 2.21709601996080  | H           | -0.72085906597707 | 7.11475020810504  | 3.13382393489055  |
| H  | -2.47614313780710 | 3.26574847128821  | 2.49835287278919  | C           | 4.19950020038195  | 4.95970534742916  | -1.42391582715664 |
| H  | -1.94772891043836 | 4.66581173870161  | 1.54918310152520  | C           | 2.84996282532040  | 4.52360534275646  | -2.01143951507004 |
| H  | -1.17736948862060 | 4.31701106710833  | 3.12515507323645  | C           | 3.81416938881644  | 6.06288685057405  | -0.45491577812006 |
| C  | -0.19858362793793 | -0.49704330630237 | 2.69668339340268  | C           | 1.76635526378541  | 5.04532231353325  | -1.20772946065553 |
| H  | -0.71560074227306 | 0.25965180057641  | 3.31766073356275  | C           | 2.29405378795995  | 6.17006114340158  | -0.34067246758633 |
| C  | -1.11447162416389 | -1.71204224086460 | 2.57313271713310  | H           | 0.82335364502256  | 5.19494934508125  | -1.75431678984633 |
| H  | -2.06981899973098 | -1.46501411231824 | 2.08599613170175  | H           | 2.03760558802476  | 7.18788371485726  | -0.69316414724509 |
| H  | -1.34401259151017 | -2.13719602155769 | 3.56279983237739  | O           | 2.76343289982848  | 3.84020974030382  | -3.02683487126763 |
| H  | -0.62917009347827 | -2.50127375055473 | 1.97403230292381  | O           | 4.59025901346742  | 6.78569039356247  | 0.12337696462743  |
| C  | 1.09452963404455  | -0.88632460648616 | 3.40566642722530  | C           | 5.13164093044047  | 5.48121689956728  | -2.50993028085009 |
| H  | 1.70617830297760  | -1.54968327573321 | 2.77064188799014  | H           | 5.38212559979316  | 4.67295649226801  | -3.21212994531020 |
| H  | 0.87713965010475  | -1.42768321574467 | 4.33969445405550  | H           | 4.65206376557501  | 6.29291666532683  | -3.07781043291011 |
| H  | 1.70904668227721  | -0.01251391608447 | 3.66735585276302  | H           | 6.06011989706795  | 5.86897444152331  | -2.06861461898106 |
| C  | 2.43203818566157  | 1.12059080519543  | -0.81831803376171 | C           | 4.79623512284865  | 3.74090854474346  | -0.66307415159575 |
| C  | 3.20827409007173  | 0.42860234651529  | -3.10206341032030 | H           | 4.10915480010940  | 3.45822406437304  | 0.15076983856691  |
| O  | 3.27058900290214  | 0.45685415019165  | -0.20665430519394 | H           | 4.78082029059567  | 2.90907729278755  | -1.37902727024622 |
| H  | 2.05837089788560  | 0.92170635918337  | 1.75384826704234  | C           | 6.19282197733736  | 3.91050812787574  | -0.13664228490185 |
| H  | -1.97053067389322 | 2.61584866365344  | -0.12998486352290 | C           | 7.29240952784472  | 3.58348281818134  | -0.94250253862852 |
| N  | 2.37280691048595  | 1.1859999447295   | -2.16019755696487 | C           | 6.43890295892006  | 4.38102403067202  | 1.15940175903876  |
| H  | 1.82086949070329  | 1.93610425499856  | -2.56298312801100 | C           | 8.59707611119419  | 3.73460065078346  | -0.47481363972530 |
| C  | 4.67635405302189  | 0.84961818678068  | -3.01429590844138 | H           | 7.11888670979401  | 3.19546003560282  | -1.94996486057892 |
| C  | 3.06379220233578  | -1.07008165186795 | -2.82478748517572 | C           | 7.74150788604051  | 4.53293349172587  | 1.63236579545074  |
| C  | 2.66714786374937  | 0.74142642941185  | -4.49588225915614 | H           | 5.60048794247493  | 4.62897576793179  | 1.81412516194539  |
| H  | 3.25166002459329  | 0.20428263152179  | -5.25676659441080 | C           | 8.82639849759751  | 4.21392777571781  | 0.81531099741748  |
| H  | 1.61464640853058  | 0.42961455422305  | -4.58599974353912 | H           | 9.43930264600057  | 3.47004918660738  | -1.11958379906376 |
| H  | 2.73301046225831  | 1.82023604380821  | -4.70215878599328 | H           | 7.90942417404691  | 4.89976728208226  | 2.64838645858738  |
| H  | 3.64317082107468  | -1.64416681278487 | -3.56362799968403 | H           | 9.84795033100506  | 4.33102611267667  | 1.18612765347989  |
| H  | 3.42845821815902  | -1.31929816749042 | -1.81986069758102 | N           | -0.19494483386537 | 7.31780177287850  | 0.56544237210214  |
| H  | 2.00802354616602  | -1.37318782354699 | -2.90064779792810 | H           | -0.10908626810482 | 7.10315249789926  | -0.41931670665650 |
| H  | 5.28070462706465  | 0.26155935418825  | -3.72158664483438 | H           | -1.12348121607327 | 7.60366430265563  | 0.84998154980745  |
| H  | 4.77956009546544  | 1.91408248922127  | -3.26885124833981 |             |                   |                   |                   |
| H  | 5.06587206423775  | 0.68535762805308  | -2.00036984322224 | <b>CR14</b> |                   |                   |                   |
| Rh | 1.11364486993192  | 3.85169665187206  | 0.42380945452603  | H           | -0.00319529531023 | -0.60137029656224 | 0.39234833001602  |
| C  | 1.76944754751809  | 5.97940424390070  | 1.07533768015058  | C           | -0.75243843454431 | 3.05403865162232  | 1.44125332156675  |
| C  | 2.52051416610077  | 5.29067700588020  | 2.05661158617612  | C           | -1.12528852526640 | 2.40680453664837  | 0.11459097012218  |

|   |                   |                   |                   |    |                   |                   |                   |
|---|-------------------|-------------------|-------------------|----|-------------------|-------------------|-------------------|
| C | 0.18660838472476  | 2.46524424572280  | -0.63963964936069 | Rh | 1.19799369465512  | 3.76152569994042  | 0.63148082711760  |
| H | 0.21680043921079  | 2.69304086755877  | -1.70984620073488 | C  | 2.13380803303413  | 5.68091550237758  | 1.50446532712688  |
| C | 1.21432361357633  | 1.75625152389132  | 0.02535453105981  | C  | 2.69806027865449  | 4.77805501385845  | 2.43862769879570  |
| C | 0.75778978360739  | 1.16033862571293  | 1.34671717816208  | C  | 2.20037342073195  | 4.66605898524812  | 3.73752365588923  |
| C | 0.27004075421513  | 2.38128078424344  | 2.09492050812542  | C  | 1.11618165798360  | 5.45747994775245  | 4.11446265022191  |
| H | 0.52092597403386  | 2.56525903974151  | 3.14261584043187  | C  | 0.51444061024763  | 6.32260174506200  | 3.20913220188368  |
| C | -1.53961903431919 | 0.94268708492894  | 0.36426197105628  | C  | 0.99127250315680  | 6.44625763565180  | 1.89095654084965  |
| H | -1.80431620007790 | 0.47371116268913  | -0.59581320012307 | H  | 3.59869050927987  | 4.22464935482036  | 2.16450593031196  |
| H | -2.45368755607162 | 0.94294516866219  | 0.98009469356939  | H  | 2.66509192513179  | 3.97691417535355  | 4.44495906504237  |
| C | -0.40601801241942 | 0.16880073419736  | 1.07567891526838  | H  | 0.71891121963605  | 5.39271394806449  | 5.13084900954073  |
| C | -1.68654024610962 | 4.04280132504147  | 2.05637502407497  | H  | -0.34512681204537 | 6.92575660430067  | 3.51237600146322  |
| H | -2.67866280717648 | 3.57209957470350  | 2.17180139831212  | C  | 4.62789944971584  | 4.77944105220201  | -1.07772353090009 |
| H | -1.82292652753882 | 4.92424918902144  | 1.40985140969130  | C  | 3.26373462272200  | 4.32317747405820  | -1.61214312731484 |
| H | -1.34189571442250 | 4.37618607179586  | 3.04226905964752  | C  | 4.27493773808214  | 5.65070504651931  | 0.11562175656526  |
| C | -0.89587155802092 | -0.55534801927467 | 2.34002922503342  | C  | 2.19441034728212  | 4.91667435062888  | -0.83098584304698 |
| H | -1.38433746998747 | 0.20342297334788  | 2.98118924720443  | C  | 2.77709834044829  | 5.91788969552373  | 0.14604588171713  |
| C | -1.93756201032530 | -1.61342139605879 | 1.98484207638196  | H  | 1.32230954983333  | 5.21625104122528  | -1.43277528904164 |
| H | -2.79038194863387 | -1.18966999519322 | 1.43369301587443  | H  | 2.65888873595921  | 6.97853685383116  | -0.14827324463066 |
| H | -2.33330570673720 | -2.09838964389126 | 2.89092973207788  | O  | 3.15156408604504  | 3.62204712322079  | -2.61083142259319 |
| H | -1.48994077823305 | -2.39959438245557 | 1.35328921200951  | O  | 5.07119336946165  | 6.07605173500295  | 0.91876528987735  |
| C | 0.23983002833869  | -1.18836553829045 | 3.13709027450508  | C  | 5.54965626701522  | 3.63481319177492  | -0.67842246479507 |
| H | 0.82769272950055  | -1.87550634038333 | 2.50470050043159  | H  | 6.44949744183910  | 4.03530659262862  | -0.18837169631993 |
| H | -0.15823676626723 | -1.77304424347861 | 3.98105085224470  | H  | 5.04409320940360  | 2.94069904785149  | 0.00836835177096  |
| H | 0.93005993086978  | -0.43982054068048 | 3.55286103722174  | H  | 5.85438446006646  | 3.06691020002061  | -1.56894787598976 |
| C | 2.42246643295620  | 1.11297450716659  | -0.58690802664252 | C  | 5.30450619628167  | 5.65626557846773  | -2.16448823023677 |
| C | 3.17301033126310  | -0.16620031513920 | -2.61973575493327 | H  | 6.28895517455905  | 5.96343027772247  | -1.77795261989575 |
| O | 3.44723779879578  | 0.93770268890810  | 0.07296298042503  | H  | 5.47028290146968  | 5.00334488155583  | -3.03543382563915 |
| H | 1.60271582521479  | 0.67557452217277  | 1.84739146726920  | C  | 4.50414758059494  | 6.86756656815886  | -2.56483564200959 |
| H | -1.91911287379223 | 2.96997978615210  | -0.39450017107856 | C  | 3.52477646960234  | 6.78567291308283  | -3.56420300735842 |
| N | 2.24445906877471  | 0.66394833898554  | -1.84113833091708 | C  | 4.68410046107617  | 8.09201850019688  | -1.90784382157880 |
| H | 1.33347659827925  | 0.82762441087000  | -2.25161724428431 | C  | 2.73821014325711  | 7.89046943532084  | -3.88708365966417 |
| C | 4.54222986612458  | 0.50409532274488  | -2.73935327919675 | H  | 3.37418940696663  | 5.83791390971843  | -4.08687071546589 |
| C | 3.30217746560238  | -1.53844146400165 | -1.95260497434557 | C  | 3.89822754977358  | 9.19914703699440  | -2.22749763757445 |
| C | 2.55137674265889  | -0.31220062607530 | -4.00666386141971 | H  | 5.44872011339003  | 8.17560073724582  | -1.13050865190257 |
| H | 3.18308699818459  | -0.95221049036742 | -4.63908286471151 | C  | 2.91868215855104  | 9.10052955641959  | -3.21596564733395 |
| H | 1.55202097288842  | -0.77245021897936 | -3.94496290836981 | H  | 1.97922430660963  | 7.80542597711164  | -4.66944932579457 |
| H | 2.45454866920379  | 0.66978785257032  | -4.49556626788894 | H  | 4.05390948475360  | 10.14532033590477 | -1.70267014600402 |
| H | 3.99163761362773  | -2.17891701623721 | -2.52351673648656 | H  | 2.30214381115819  | 9.96708140022311  | -3.46839775891782 |
| H | 3.69143859131785  | -1.43197553439479 | -0.93009858721379 | N  | 0.42343796518437  | 7.34308495146545  | 1.02946356193878  |
| H | 2.32256757283065  | -2.03910215877586 | -1.90473536311034 | H  | 0.55311367569624  | 7.21403665429640  | 0.03431183826066  |
| H | 5.18511109134042  | -0.08757681592717 | -3.40845390588883 | H  | -0.48595517727039 | 7.71125955399769  | 1.27982513869033  |
| H | 4.43466813361676  | 1.52026321240791  | -3.14389415005262 |    |                   |                   |                   |
| H | 5.02441481450249  | 0.57830995985834  | -1.75652775807957 |    |                   |                   |                   |

CR15

|   |                   |                   |                   |    |                   |                  |                   |
|---|-------------------|-------------------|-------------------|----|-------------------|------------------|-------------------|
| H | -0.26789052325780 | -0.72070365878085 | 0.90584706305241  | H  | 6.10045879439835  | 0.41413518290722 | 3.59116637638103  |
| C | -0.79367211665750 | 3.07229155322711  | 0.29334527662343  | H  | 5.31197229712467  | 1.94441984583877 | 3.12982566681606  |
| C | -0.15916393095322 | 2.09475041715454  | -0.68253419311359 | H  | 4.35647040848802  | 0.64504586120016 | 3.89967484132640  |
| C | 1.24580263583921  | 1.97681551007177  | -0.13532056884972 | Rh | 1.19424710307379  | 3.55255111270582 | 1.24199607615699  |
| H | 2.10883624831158  | 1.93940952334260  | -0.80672886527868 | C  | 1.53995697869663  | 5.51381246304426 | 2.38453967500545  |
| C | 1.27103683604827  | 1.47138306750459  | 1.18602655361122  | C  | 0.45170124366808  | 6.14841225441038 | 1.74599905758910  |
| C | -0.12087898547971 | 1.24177972992561  | 1.74333109411609  | C  | -0.80480704647636 | 6.23871923959796 | 2.34069949637308  |
| C | -0.74928461814985 | 2.61526846084584  | 1.60326863338303  | C  | -1.00749861258782 | 5.64659493271166 | 3.5865596973892   |
| H | -1.33531979445313 | 3.07486788843594  | 2.40428715280725  | C  | 0.02699059959196  | 4.98316101640672 | 4.23187701884213  |
| C | -0.88992594861328 | 0.73895928871989  | -0.58875448047450 | C  | 1.32008267900926  | 4.92328198042968 | 3.67318522267847  |
| H | -0.42042955847218 | 0.02881654824095  | -1.28634476832608 | H  | 0.61975043830818  | 6.64153762074743 | 0.78876099521234  |
| H | -1.92691684244149 | 0.88377808652036  | -0.93258229262292 | H  | -1.61479600669531 | 6.76028520496391 | 1.82851980733461  |
| C | -0.86701632690168 | 0.20664571637687  | 0.86199734540316  | H  | -1.98895982372203 | 5.69664232807504 | 4.06513822734698  |
| C | -1.65393939063659 | 4.17354306504491  | -0.22936161625553 | H  | -0.13621440164741 | 4.52951771799378 | 5.21299262093807  |
| H | -2.46933422663599 | 3.73352898367742  | -0.82994513500187 | C  | 3.48582313555537  | 5.37644905966688 | -0.63835390059907 |
| H | -1.08974917433303 | 4.84264899754707  | -0.89782036827570 | C  | 3.09486277927682  | 6.29049533893266 | 0.51250466247893  |
| H | -2.09780438981995 | 4.76801385879728  | 0.57761673354718  | C  | 3.67464928496160  | 4.01816776050992 | 0.03967019725764  |
| C | -2.27294667433322 | -0.13167945296971 | 1.38473076241539  | C  | 2.95796084240571  | 5.50561559103137 | 1.81727049063906  |
| H | -2.90159591953598 | 0.76687864978666  | 1.23383694280580  | C  | 3.25091796808855  | 4.07226985568463 | 1.41525612909678  |
| C | -2.88485772748143 | -1.27490903684154 | 0.57926629340578  | H  | 3.66371154684373  | 5.95524926923936 | 2.54309393567633  |
| H | -2.91222089135279 | -1.05556934374612 | -0.49869535631949 | H  | 3.73645971171839  | 3.37852055048804 | 2.10934803284635  |
| H | -3.91644803063399 | -1.48045242616369 | 0.90521244060611  | O  | 2.96097977903495  | 7.48791305675194 | 0.42620880375096  |
| H | -2.29973455672687 | -2.19996678516892 | 0.71706169506456  | O  | 4.13139464537743  | 3.04552536306499 | -0.57286670038637 |
| C | -2.28636482816651 | -0.47310268769219 | 2.87149660224850  | C  | 4.80971294485803  | 5.84809936746984 | -1.23686829428289 |
| H | -1.57399367466693 | -1.28567706777964 | 3.09394454569303  | H  | 4.70354007560567  | 6.85989093954481 | -1.65186149689164 |
| H | -3.28655790810029 | -0.81338087701398 | 3.18212267025017  | H  | 5.60016321445671  | 5.87126305886056 | -0.47104584655701 |
| H | -2.02123507426055 | 0.38783928238403  | 3.50273607982423  | H  | 5.12408423190429  | 5.16079801376003 | -2.03557191522151 |
| C | 2.41276097618203  | 0.76253827712681  | 1.85743015967991  | C  | 2.36749536929639  | 5.23473372197554 | -1.70346159161787 |
| C | 4.85615066177697  | 0.27005399183125  | 1.81375546218063  | H  | 2.69968019013848  | 4.42458440348303 | -2.37241917337006 |
| O | 2.19379644216460  | 0.11414542422181  | 2.88359473319561  | H  | 1.45893722291838  | 4.87217673168047 | -1.19288720557950 |
| H | -0.04841749020946 | 0.91123109500709  | 2.78348054875478  | C  | 2.04599169704095  | 6.46096524251655 | -2.50821173786532 |
| H | -0.16644049512347 | 2.48894712903048  | -1.70750297736076 | C  | 0.96529920255605  | 7.28306271481680 | -2.16551169459063 |
| N | 3.62226579574837  | 0.86056290394991  | 1.27693188116589  | C  | 2.80842091510890  | 6.80487972032053 | -3.63344303102894 |
| H | 3.74762112945019  | 1.54005751645697  | 0.51699696263153  | C  | 0.66569504054024  | 8.42488069988267 | -2.90748451666996 |
| C | 5.17241650021308  | 0.85387652124342  | 3.19472998232961  | H  | 0.33766979369775  | 7.01694323810581 | -1.31116020564986 |
| C | 4.72273193677835  | -1.25303734877566 | 1.88962898198728  | C  | 2.51547620682229  | 7.94746789368411 | -4.37673531197083 |
| C | 5.97554597572860  | 0.63138599607790  | 0.83948006593906  | H  | 3.63782185498572  | 6.16091705644534 | -3.93746323198384 |
| H | 6.92904346234428  | 0.21448416054300  | 1.19473674181934  | C  | 1.44517761514927  | 8.76560755455985 | -4.01292526409208 |
| H | 5.77115750119177  | 0.22290298945840  | -0.16251454788110 | H  | -0.18499064983396 | 9.04949142411315 | -2.62254010250983 |
| H | 6.08239350710403  | 1.72231671452217  | 0.74766655354608  | H  | 3.12337240864054  | 8.19628140633880 | -5.25063202852227 |
| H | 5.66626108234419  | -1.69647512645331 | 2.24280953534826  | H  | 1.21276112922133  | 9.66000050300260 | -4.59670631066581 |
| H | 3.91751485198939  | -1.54092366959217 | 2.57763414535150  | N  | 2.35357066502551  | 4.41137939239753 | 4.40258664232615  |
| H | 4.49812154926612  | -1.66630191022409 | 0.89405292521345  | H  | 3.20117863660547  | 4.12758258806863 | 3.93130453419173  |

|             |                   |                   |                   |    |                   |                   |                   |
|-------------|-------------------|-------------------|-------------------|----|-------------------|-------------------|-------------------|
| H           | 2.12017536055398  | 3.85092679363056  | 5.21294923280116  | H  | 5.83550755022813  | -1.40513955420676 | 1.88712760470772  |
|             |                   |                   |                   | H  | 4.11790987730046  | -1.33350747928418 | 2.37746948823323  |
| <b>CR16</b> |                   |                   |                   | H  | 4.55170432407193  | -1.42422254750011 | 0.64809559639787  |
| H           | -0.17297370991635 | -0.74796559974123 | 0.89889233501723  | H  | 6.28780429457081  | 0.71095173615780  | 3.21355083604582  |
| C           | -1.00590803490417 | 3.01970243159559  | 0.52219832764465  | H  | 5.40495424706918  | 2.21041177416407  | 2.83023694684713  |
| C           | -0.35335840645150 | 2.14624532557380  | -0.53696138653125 | H  | 4.56969495453346  | 0.87188878193671  | 3.67199116999224  |
| C           | 1.08455845944726  | 2.10754897329474  | -0.07212617096472 | Rh | 0.99955467229801  | 3.60060437402865  | 1.38933049108977  |
| H           | 1.90939632387293  | 2.17441379307075  | -0.78773478847077 | C  | 1.29533832105537  | 5.52080040680081  | 2.61185951837964  |
| C           | 1.22065228960416  | 1.53657795300410  | 1.21574695720701  | C  | 0.16870181938681  | 6.09638379629567  | 1.98275723871684  |
| C           | -0.11728284587063 | 1.17680629511395  | 1.83290265660233  | C  | -1.08354614529393 | 6.11866860088457  | 2.59671222963178  |
| C           | -0.85161732795576 | 2.50405429313664  | 1.80114534079074  | C  | -1.24071556034800 | 5.50946682127406  | 3.83970401181839  |
| H           | -1.42327746358171 | 2.87758379362188  | 2.65575813294943  | C  | -0.16882102007072 | 4.88253118322276  | 4.46248564890635  |
| C           | -0.97476139864570 | 0.73455911921052  | -0.48107545761533 | C  | 1.11618004945112  | 4.88852510082849  | 3.88561276230656  |
| H           | -0.48866824806352 | 0.09909753035004  | -1.23692036669685 | H  | 0.29623208682686  | 6.60331388431747  | 1.02494497052696  |
| H           | -2.03575571799740 | 0.81524407251352  | -0.76788588234117 | H  | -1.92535382374267 | 6.60302512152958  | 2.09983506629751  |
| C           | -0.83683323454116 | 0.13461347712436  | 0.93668486359410  | H  | -2.21674369401094 | 5.51048195766053  | 4.33178856138735  |
| C           | -1.97985159826160 | 4.06980736476246  | 0.10518779701584  | H  | -0.29928120111862 | 4.40390533133100  | 5.43659033951806  |
| H           | -2.77219480545941 | 3.59917334158798  | -0.50296415276860 | C  | 3.25796991372721  | 5.71409431338695  | -0.40654026562029 |
| H           | -1.50301730189091 | 4.83513903878617  | -0.52737240617854 | C  | 2.80067363837024  | 6.50094687583515  | 0.81283733524613  |
| H           | -2.44806393353414 | 4.56240450489424  | 0.96527907742058  | C  | 3.41850142139889  | 4.28956179589165  | 0.12296822850245  |
| C           | -2.18548267010048 | -0.33073465335963 | 1.50999675834624  | C  | 2.70741928456911  | 5.60032400732909  | 2.03786397655223  |
| H           | -2.88314513782640 | 0.52599766672839  | 1.43994270816733  | C  | 3.02928098095757  | 4.21518743836084  | 1.50912485301445  |
| C           | -2.75721197115193 | -1.47433169962368 | 0.67567251800585  | H  | 3.40945450578612  | 6.00063104577420  | 2.79491215162767  |
| H           | -2.86259905113105 | -1.20319667333128 | -0.38562100018043 | H  | 3.55790871719466  | 3.48764307870789  | 2.13404330705810  |
| H           | -3.75053897670080 | -1.77503043260325 | 1.04395314582965  | O  | 2.55250015306078  | 7.68322604694314  | 0.81021091928825  |
| H           | -2.09851772938408 | -2.35768440084281 | 0.73039088675438  | O  | 3.85400737615185  | 3.37792230789842  | -0.59126280224119 |
| C           | -2.09477832124533 | -0.74671526623982 | 2.97450519204068  | C  | 2.23195139446119  | 5.80186879195521  | -1.53247851725020 |
| H           | -1.32511610106394 | -1.52480523154535 | 3.11529332246931  | H  | 2.57382514301494  | 5.20791059373324  | -2.39289810437179 |
| H           | -3.05417579130455 | -1.16326269828357 | 3.31918196371953  | H  | 1.25630167007242  | 5.40820619278700  | -1.20495777786962 |
| H           | -1.84541917083070 | 0.09600133782299  | 3.63584594114980  | H  | 2.10230130035215  | 6.84725704579210  | -1.84974191158558 |
| C           | 2.44606449897205  | 0.88276564569567  | 1.78928575932283  | C  | 4.63149847681865  | 6.24646448556303  | -0.87799076633192 |
| C           | 4.90218883370660  | 0.52251429515074  | 1.54828856820922  | H  | 4.93959376599317  | 5.62952457531298  | -1.73605349687600 |
| O           | 2.33943677833732  | 0.20418694278233  | 2.81367413391530  | H  | 4.48325549891637  | 7.27660492660590  | -1.23731285918814 |
| H           | 0.03832245099287  | 0.80129601951629  | 2.84860554502131  | C  | 5.68756347935288  | 6.21486517170285  | 0.19584087296778  |
| H           | -0.44779724831969 | 2.58935358479371  | -1.53728484214340 | C  | 5.87794341602695  | 7.30969492803178  | 1.04961186650359  |
| N           | 3.60181111779659  | 1.06013839979923  | 1.12387364624876  | C  | 6.46801034746663  | 5.06898398947197  | 0.39978678402136  |
| H           | 3.63565031017557  | 1.78375639804978  | 0.39479682933908  | C  | 6.81013433165152  | 7.25548063615932  | 2.08598042001883  |
| C           | 5.31288297533127  | 1.11509016325873  | 2.90039241455253  | H  | 5.28551607368099  | 8.21617186113768  | 0.89997184950471  |
| C           | 4.84450490749050  | -1.00525585067850 | 1.62343131859359  | C  | 7.39827887630162  | 5.00980826399845  | 1.43625803244975  |
| C           | 5.91519956118210  | 0.93528619248031  | 0.48226308189801  | H  | 6.33475724684386  | 4.21124120367255  | -0.26333246765567 |
| H           | 6.91264829339148  | 0.55472184466579  | 0.74581705803314  | C  | 7.57028907754624  | 6.10308758615040  | 2.28624334142345  |
| H           | 5.63804286547349  | 0.52684435431171  | -0.50214411148811 | H  | 6.94426320867360  | 8.12117092127469  | 2.73995618820789  |
| H           | 5.97151478188927  | 2.02993584984254  | 0.39607926556334  | H  | 7.99385260692047  | 4.10401870421706  | 1.57851117973671  |



|                                                 |                   |                   |                   |                                                 |                   |                   |                   |
|-------------------------------------------------|-------------------|-------------------|-------------------|-------------------------------------------------|-------------------|-------------------|-------------------|
| H                                               | 8.30013285424040  | 6.05971910420409  | 3.09880264757938  | C                                               | -0.84692225782622 | 7.06203641715675  | 2.52785218060383  |
| N                                               | 2.18432110462701  | 4.39743960972258  | 4.58262779553083  | C                                               | -0.97718830364682 | 6.80508140687110  | 3.89327040746939  |
| H                                               | 3.01843959570782  | 4.13213951384003  | 4.07634841577190  | C                                               | -0.24048094020877 | 5.78508232600227  | 4.48886512263133  |
| H                                               | 1.98228446637677  | 3.80395880880872  | 5.37803289863903  | C                                               | 0.65024104657052  | 5.00327636589473  | 3.73767902939540  |
| <b>TS23 -315.32 cm**-1 ***imaginary mode***</b> |                   |                   |                   | H                                               | 0.14618622071193  | 6.50572012053248  | 0.70951390188077  |
| H                                               | -0.15578286691190 | -0.76135784031699 | 0.83808800031208  | H                                               | -1.42171430827545 | 7.85963420978420  | 2.05157649245753  |
| C                                               | -0.67901703785857 | 3.04110070757334  | 0.3284468353789   | H                                               | -1.65786991326772 | 7.40316097313069  | 4.50484328766827  |
| C                                               | -0.07750465960216 | 2.08211851087877  | -0.68631763642999 | H                                               | -0.34347111320666 | 5.58104221411331  | 5.55873174926947  |
| C                                               | 1.34123182367054  | 1.90878925343790  | -0.19361539816460 | C                                               | 3.41702331814461  | 5.33557128438440  | -0.56284819168337 |
| H                                               | 2.18463028935477  | 1.90348116177609  | -0.89016327929524 | C                                               | 2.82301073579946  | 6.12905112713257  | 0.59623128453789  |
| C                                               | 1.40972558568552  | 1.38861673800833  | 1.10374822509387  | C                                               | 3.75663922408297  | 3.99759808274129  | 0.09009057360503  |
| C                                               | 0.03977112988466  | 1.17866256785157  | 1.71761915787400  | C                                               | 2.67369387246729  | 5.24283228090767  | 1.81529568789804  |
| C                                               | -0.59115861620607 | 2.55479831766721  | 1.62472481860509  | C                                               | 3.34599330472447  | 4.00198087314324  | 1.48540351658680  |
| H                                               | -1.15712533657219 | 2.99412018341775  | 2.45092100247526  | H                                               | 2.89199475631307  | 5.73202391933756  | 2.76869095161273  |
| C                                               | -0.83211921679769 | 0.73622159735033  | -0.59118336891920 | H                                               | 3.83835188735545  | 3.35948907978167  | 2.22003524732201  |
| H                                               | -0.41150301629225 | 0.03425911248495  | -1.32656979938369 | O                                               | 2.60263913681420  | 7.31604418694223  | 0.57913151032936  |
| H                                               | -1.87991650351905 | 0.91415739583098  | -0.88156108419352 | O                                               | 4.33101933749016  | 3.09212780018644  | -0.51264543933435 |
| C                                               | -0.75192290013652 | 0.16879033340014  | 0.84338633655402  | C                                               | 4.71447458493579  | 6.00034272904679  | -1.02514307747562 |
| C                                               | -1.55502223433767 | 4.15728977491200  | -0.12421167225428 | H                                               | 4.51173641256020  | 7.01441656708945  | -1.39571355442281 |
| H                                               | -2.42543080422916 | 3.73730930979054  | -0.65795223393508 | H                                               | 5.43570636926444  | 6.07184407404439  | -0.19662743000158 |
| H                                               | -1.03044900226402 | 4.81646204971547  | -0.83244650444117 | H                                               | 5.17023756724071  | 5.40740674092979  | -1.83129179896854 |
| H                                               | -1.91913668153799 | 4.75794095245579  | 0.71921471798398  | C                                               | 2.42242603669219  | 5.10903369189988  | -1.72630372447805 |
| C                                               | -2.13407090947321 | -0.17248382570565 | 1.42302553067032  | H                                               | 2.87530439889357  | 4.33352806578834  | -2.36433073829456 |
| H                                               | -2.75995382495576 | 0.73597809759632  | 1.33154581504157  | H                                               | 1.49644860490828  | 4.68172617140822  | -1.30583007214948 |
| C                                               | -2.79556120241853 | -1.28428855292978 | 0.61322430356263  | C                                               | 2.10281080810930  | 6.32178364098556  | -2.55266957916032 |
| H                                               | -2.87973089068645 | -1.02793374166147 | -0.45353017519060 | C                                               | 1.01762012750753  | 7.14700490519990  | -2.23393470897586 |
| H                                               | -3.80926691634788 | -1.49513636794680 | 0.98783765381263  | C                                               | 2.88901252410595  | 6.65866057699925  | -3.66286726435634 |
| H                                               | -2.21010774749887 | -2.21628167838359 | 0.68805726868026  | C                                               | 0.73354220242343  | 8.28364321202650  | -2.98929296709288 |
| C                                               | -2.07529296787243 | -0.56136620605361 | 2.89691417666394  | H                                               | 0.38142793593881  | 6.89095221606150  | -1.38360906423421 |
| H                                               | -1.36242124333367 | -1.38832079451006 | 3.05577167302548  | C                                               | 2.61040608862024  | 7.79532592269057  | -4.42097992519510 |
| H                                               | -3.06214855846668 | -0.90076648589744 | 3.24792245024890  | H                                               | 3.72933642720119  | 6.01586944863064  | -3.93953109185311 |
| H                                               | -1.76809111947990 | 0.27548962484578  | 3.54125859538741  | C                                               | 1.53314067686885  | 8.61519107904260  | -4.08355992348790 |
| C                                               | 2.57843260539012  | 0.69545667220926  | 1.73785738700220  | H                                               | -0.11966031790425 | 8.91299370272874  | -2.72314999175218 |
| C                                               | 4.95445344171885  | 0.24278055444663  | 1.73729261785861  | H                                               | 3.23652498978089  | 8.03903498007972  | -5.28340563374510 |
| O                                               | 2.41497530028865  | 0.02333278738624  | 2.75666794628732  | H                                               | 1.31254477944387  | 9.50584868863625  | -4.67756576543308 |
| H                                               | 0.14921075862156  | 0.82851648068884  | 2.74791231109656  | N                                               | 1.43584870664738  | 4.04825603954159  | 4.34920303260652  |
| H                                               | -0.11026664644205 | 2.49592851292175  | -1.70252256750729 | H                                               | 1.68960335572769  | 3.24830926172562  | 3.77668782300532  |
| N                                               | 3.77697468612390  | 0.82212555116444  | 1.14279098796842  | H                                               | 1.16910147515621  | 3.78708399146927  | 5.29188323113875  |
| H                                               | 3.92424199983191  | 1.53540200800293  | 0.42080831446348  | H                                               | 5.80616674438114  | 0.39901213174864  | 1.06288947230812  |
| Rh                                              | 1.33005335182636  | 3.51542644221636  | 1.24183788948675  | H                                               | 4.82284903005811  | -0.83804359420635 | 1.89628166482482  |
| C                                               | 0.78087327264140  | 5.25646876822892  | 2.34467066715127  | H                                               | 5.19179522768732  | 0.69757480290608  | 2.71482819060207  |
| C                                               | 0.035822238791110 | 6.29166459263116  | 1.77300083321172  | <b>TS24 -316.02 cm**-1 ***imaginary mode***</b> |                   |                   |                   |

|    |                   |                   |                   |      |                                     |                   |                   |
|----|-------------------|-------------------|-------------------|------|-------------------------------------|-------------------|-------------------|
| H  | -0.09067115954148 | -0.81918570503686 | 0.85925507365810  | H    | -2.08232873455749                   | 7.26023230090341  | 4.58924187050770  |
| C  | -0.85526135126884 | 2.96321880012186  | 0.53009950799151  | H    | -0.72311523458968                   | 5.49989063559758  | 5.68987720999416  |
| C  | -0.22473842124563 | 2.09141689553375  | -0.54341111379148 | C    | 3.11272077145470                    | 5.57605570498327  | -0.32814879740824 |
| C  | 1.21539643529046  | 1.98934870909752  | -0.09729202875602 | C    | 2.55591251319812                    | 6.27145738197327  | 0.90965800682232  |
| H  | 2.03540587904495  | 2.06975294100572  | -0.81691571520713 | C    | 3.49970429325049                    | 4.20115008331982  | 0.20772200929207  |
| C  | 1.35623924230866  | 1.41440528551464  | 1.17147456341022  | C    | 2.43656818847433                    | 5.28797170565321  | 2.05053569963383  |
| C  | 0.02121754074793  | 1.09278281860313  | 1.81324973408997  | C    | 3.14724528337474                    | 4.10042460863617  | 1.61665986741734  |
| C  | -0.69339486432055 | 2.43007102150412  | 1.80030210434799  | H    | 2.63893026250707                    | 5.6984902540357   | 3.04419387985439  |
| H  | -1.26138909620072 | 2.7962552377180   | 2.66004292632781  | H    | 3.68495426741979                    | 3.42796145799969  | 2.28985451824482  |
| C  | -0.88290194640859 | 0.69357590033874  | -0.49200264375402 | O    | 2.31345808366111                    | 7.45184791686462  | 0.98219933448593  |
| H  | -0.42590709603617 | 0.05481840347541  | -1.26253659921827 | O    | 4.06459054965987                    | 3.35047187673655  | -0.47964061165334 |
| H  | -1.94550411403234 | 0.80772744481503  | -0.75942193092037 | C    | 2.06010315459413                    | 5.49634796312931  | -1.43226844192823 |
| C  | -0.73610703037915 | 0.07563354168102  | 0.91632646528987  | H    | 2.46225482668153                    | 4.93150220216576  | -2.28637808832653 |
| C  | -1.82203297732439 | 4.03210168300189  | 0.15531668885151  | H    | 1.15076344813994                    | 4.98621479411083  | -1.07545795393068 |
| H  | -2.67599549006401 | 3.57328509842085  | -0.37324745068601 | H    | 1.78719375182565                    | 6.50671320797548  | -1.77145803129660 |
| H  | -1.37077675562207 | 4.76101667831897  | -0.53496658787945 | C    | 4.37037276894335                    | 6.31296185649744  | -0.84232752581813 |
| H  | -2.20248740784531 | 4.56610881690800  | 1.03557777233947  | H    | 4.66627480204732                    | 5.82930702993401  | -1.78519415092805 |
| C  | -2.08419748050708 | -0.36455735935099 | 1.50924143815870  | H    | 4.06714822121772                    | 7.34520551515530  | -1.07686770436120 |
| H  | -2.76329071593137 | 0.50841460512023  | 1.46152622013104  | C    | 5.53290121033389                    | 6.31260661732944  | 0.11583509625952  |
| C  | -2.69611234271700 | -1.48464909706010 | 0.67201014891207  | C    | 5.64782946114444                    | 7.28526900017279  | 1.11847035284050  |
| H  | -2.81622427120296 | -1.19697972634657 | -0.38332869346155 | C    | 6.51906501068304                    | 5.31957087515212  | 0.03681537271734  |
| H  | -3.68828564182930 | -1.76807473488123 | 1.05629649040343  | C    | 6.71089950208077                    | 7.26010725020873  | 2.02132137400691  |
| H  | -2.05563134866330 | -2.38237376248348 | 0.70242914657531  | H    | 4.89718688332653                    | 8.07663328479611  | 1.18742660768956  |
| C  | -1.97460215977660 | -0.79947543682590 | 2.96695271380268  | C    | 7.58348592392666                    | 5.29263077836170  | 0.93657761984703  |
| H  | -1.21907084758920 | -1.59509302254165 | 3.08406089448452  | H    | 6.44393513798198                    | 4.55511836369067  | -0.74039647163055 |
| H  | -2.93595912755661 | -1.19959384921104 | 3.32486323531317  | C    | 7.68215711470930                    | 6.26241887500980  | 1.93477257025183  |
| H  | -1.69559107671909 | 0.02981053843405  | 3.63349453372243  | H    | 6.78449057345088                    | 8.03038794352121  | 2.79356834758385  |
| C  | 2.58388256292173  | 0.75987462158772  | 1.72995224219992  | H    | 8.34356197796439                    | 4.51097276905351  | 0.85453380674400  |
| C  | 4.98424293930415  | 0.46627477007588  | 1.63207348846463  | H    | 8.51788197712496                    | 6.24468075223308  | 2.63918124178184  |
| O  | 2.49598011474894  | 0.02288286483855  | 2.71275136369020  | N    | 1.16764913384820                    | 4.05270879098601  | 4.53968393341433  |
| H  | 0.18259748210117  | 0.70463319197778  | 2.82312481602040  | H    | 1.48799042388311                    | 3.27353668041629  | 3.97191841644680  |
| H  | -0.31387564470422 | 2.54534281274409  | -1.53879873843314 | H    | 0.88222701128668                    | 3.77142252257216  | 5.47091574452736  |
| N  | 3.75149607749994  | 0.99579363566984  | 1.10765087537015  | H    | 5.80904540125438                    | 0.77844012612480  | 0.97882204613875  |
| H  | 3.82460482285909  | 1.74773774533651  | 0.41323799025766  | H    | 5.18786337571238                    | 0.82993011350576  | 2.65390529728914  |
| Rh | 1.15516945476462  | 3.52727999694029  | 1.40108543333042  | H    | 4.96125636269159                    | -0.63371743426593 | 1.66968760616332  |
| C  | 0.52915143432861  | 5.23478652724230  | 2.51801338374821  |      |                                     |                   |                   |
| C  | -0.23951465033587 | 6.23844127119941  | 1.91990425620149  | TS25 | -313.03 cm**-1 ***imaginary mode*** |                   |                   |
| C  | -1.18384670732568 | 6.96404602139339  | 2.64311113634552  | H    | 0.11226140816162                    | -0.63177707720291 | 0.08762183228673  |
| C  | -1.35194681335008 | 6.69656474767595  | 4.00279022354647  | C    | -0.81026052346127                   | 3.11080561157812  | 0.48712792651856  |
| C  | -0.59052293821876 | 5.71129608298144  | 4.62473490822930  | C    | -0.06414001443514                   | 2.50527402721470  | -0.69065651032909 |
| C  | 0.36162227212001  | 4.97316715047378  | 3.90479540617072  | C    | 1.34416008693531                    | 2.35830359706238  | -0.16343223068659 |
| H  | -0.10455457793951 | 6.4544667195830   | 0.85837238890314  | H    | 2.20510013395653                    | 2.61532146622090  | -0.78697777073565 |
| H  | -1.77868748209037 | 7.73501038006813  | 2.14789250914629  | C    | 1.42116555526372                    | 1.53560636532674  | 0.96669362960180  |

|    |                   |                   |                   |   |                   |                   |                   |
|----|-------------------|-------------------|-------------------|---|-------------------|-------------------|-------------------|
| C  | 0.06070861840666  | 1.04199974338040  | 1.41964881796489  | C | 3.0464333474933   | 4.13539895369749  | 2.1031087114859   |
| C  | -0.71791012658182 | 2.32643028213571  | 1.62672144497958  | H | 2.36048619871262  | 5.47869732150683  | 3.70754447963104  |
| H  | -1.36131237815390 | 2.48415528156635  | 2.49679886037005  | H | 3.57649724976030  | 3.39536711112162  | 2.70728532621486  |
| C  | -0.65137864790634 | 1.10568293855926  | -0.98393729757101 | O | 1.94628195823246  | 7.47340076440272  | 1.89805254858460  |
| H  | -0.10528206439300 | 0.66073747118050  | -1.82914958481114 | O | 4.18760617284340  | 3.80507227593576  | 0.00875182537658  |
| H  | -1.69598741821927 | 1.23407243268532  | -1.30921834343045 | C | 4.29415140197716  | 6.77783605479987  | 0.21975048845383  |
| C  | -0.57758706819282 | 0.21108264299577  | 0.27333458775812  | H | 4.00221242090295  | 7.82524258125708  | 0.06301821042254  |
| C  | -1.79026376781331 | 4.21043743802117  | 0.26950595840776  | H | 4.95085548255464  | 6.72817666376670  | 1.10212364157702  |
| H  | -2.59037468677760 | 3.84865064785540  | -0.39983690002793 | H | 4.86314632287602  | 6.42961261540271  | -0.65442156160368 |
| H  | -1.32371734416558 | 5.07561680006137  | -0.22599545788713 | C | 2.15432159497365  | 5.85266009919787  | -0.84171105631106 |
| H  | -2.24756905162776 | 4.54053470640124  | 1.21114957065230  | H | 2.71796065237017  | 5.27350735883010  | -1.59051340812820 |
| C  | -1.94340874690162 | -0.38433018783344 | 0.65114166583646  | H | 1.25389615839124  | 5.26654327073993  | -0.59146066884694 |
| H  | -2.65756191051933 | 0.45847634848947  | 0.72112662879691  | C | 1.75748647486247  | 7.17820253690518  | -1.42450004842772 |
| C  | -2.43308362116406 | -1.33027305699028 | -0.44203801192792 | C | 0.56052129613721  | 7.80269535472792  | -1.05295804341980 |
| H  | -2.48122083579262 | -0.83912590646583 | -1.42557943243700 | C | 2.57725968803232  | 7.81770719907127  | -2.36416354708842 |
| H  | -3.43845132440681 | -1.71511346076456 | -0.21066276186370 | C | 0.19703167936103  | 9.03548198813028  | -1.59348165126455 |
| H  | -1.75505857019412 | -2.19566072101481 | -0.53375317578636 | H | -0.09851439428262 | 7.31018581390467  | -0.33349507752914 |
| C  | -1.92407627249077 | -1.10186104291612 | 1.99716211260563  | C | 2.21989629589584  | 9.05184976469121  | -2.90541725544117 |
| H  | -1.13796414796619 | -1.87571123693938 | 2.01859300541788  | H | 3.50600956724877  | 7.33472652637060  | -2.67986983098414 |
| H  | -2.88765483877894 | -1.60115436558806 | 2.18318593327698  | C | 1.02826633504348  | 9.66669098942734  | -2.51962247004475 |
| H  | -1.74280849699731 | -0.41530826304384 | 2.83719663242883  | H | -0.74361336200603 | 9.50406951765855  | -1.29274582952898 |
| C  | 2.63451175601299  | 0.83669778594017  | 1.50228916427119  | H | 2.87317477366161  | 9.53279419435371  | -3.63832869863574 |
| C  | 5.11104230850987  | 0.62095862219495  | 1.30313661859209  | H | 0.74438645569086  | 10.63211409944801 | -2.9464663201634  |
| O  | 2.51876476656740  | 0.04571251957665  | 2.43283152371769  | N | 1.08610939394617  | 3.31430784679322  | 4.77001338083326  |
| H  | 0.16870816994462  | 0.45889687435628  | 2.33859606063770  | H | 1.44664881175615  | 2.70585417814749  | 4.04044790649083  |
| H  | -0.10639351444870 | 3.15478158423002  | -1.57460552086338 | H | 0.82983948964235  | 2.80652451207461  | 5.60918458323749  |
| N  | 3.80110810015448  | 1.10169482871397  | 0.86919112708381  | C | 6.08868242476400  | 0.75264046517917  | 0.12468130714763  |
| H  | 3.85672339070406  | 1.98901696688931  | 0.35560617679115  | C | 7.4624833096247   | 0.59074213237064  | 0.34906071267735  |
| Rh | 1.10489416322455  | 3.53424614408522  | 1.62319517555064  | C | 5.64546380932601  | 0.93409367676769  | -1.18751840425127 |
| C  | 0.33370466310899  | 4.88961450596002  | 3.07782625408228  | C | 8.36844968681349  | 0.62783740646875  | -0.70603391451920 |
| C  | -0.51169632633282 | 5.94746929660494  | 2.73184363698211  | H | 7.83144958179954  | 0.43242694672481  | 1.36495672366203  |
| C  | -1.49984416240843 | 6.40664116253590  | 3.60104876333208  | C | 6.55324755485931  | 0.96876320658651  | -2.24825998419470 |
| C  | -1.63592870870464 | 5.80791867119367  | 4.85426643746630  | H | 4.58035288102609  | 1.03999803295046  | -1.39763986185135 |
| C  | -0.79618781906418 | 4.76231415029933  | 5.22781134952937  | C | 7.91726187648835  | 0.81896055226314  | -2.01394169855582 |
| C  | 0.20233870352161  | 4.29264061644298  | 4.36091975168696  | H | 9.43575111525271  | 0.50391551385545  | -0.50567239219343 |
| H  | -0.39862818286410 | 6.42693520681926  | 1.75844268960082  | H | 6.18300784589618  | 1.11286631188439  | -3.26657721597232 |
| H  | -2.15314362198431 | 7.22930738874284  | 3.30134126006927  | H | 8.62744583139389  | 0.84663564256957  | -2.84423936656566 |
| H  | -2.40133176778906 | 6.15768485227065  | 5.55206868360055  | C | 5.09270085859103  | -0.88644697792464 | 1.57954022778035  |
| H  | -0.90155898381437 | 4.29297082679739  | 6.21044179749304  | C | 5.93939828021087  | -1.46440343028556 | 2.52794671685309  |
| C  | 3.05425136990816  | 5.90385232432366  | 0.41478481267710  | C | 4.32758625014595  | -1.72701704135746 | 0.76215656849918  |
| C  | 2.31729080905120  | 6.34613212537064  | 1.67409425949027  | C | 6.00163634744842  | -2.85155966592319 | 2.67490607762590  |
| C  | 3.50665588225993  | 4.48985266118006  | 0.77016105982658  | H | 6.56324151138731  | -0.83179428724008 | 3.16220176264834  |
| C  | 2.23349481690501  | 5.19871932236599  | 2.65816765470452  | C | 4.38606470693890  | -3.10918138127632 | 0.90897477214230  |

|                                                  |                   |                   |                   |    |                   |                   |                   |
|--------------------------------------------------|-------------------|-------------------|-------------------|----|-------------------|-------------------|-------------------|
| H                                                | 3.68127206737962  | -1.28932441531690 | -0.00214377501788 | H  | -2.78489726891986 | -1.56562170303213 | 2.81298701257095  |
| C                                                | 5.22279040732141  | -3.68013364299669 | 1.87065103663579  | H  | -1.61734150547534 | -0.31611928117263 | 3.28223296020844  |
| H                                                | 6.66815011078869  | -3.28355901829179 | 3.42593291041200  | C  | 2.66886511457878  | 0.78253401219921  | 1.57538561597675  |
| H                                                | 3.77494940736159  | -3.74734719686334 | 0.26527536181950  | C  | 5.12551641484519  | 0.55871576629041  | 1.34341218259344  |
| H                                                | 5.27003842419507  | -4.76585738196751 | 1.98677808822009  | O  | 2.58865741631431  | -0.04585121811710 | 2.47722992182197  |
| C                                                | 5.52142446835637  | 1.49208971787542  | 2.49839009173282  | H  | 0.25231794837157  | 0.51198340967874  | 2.60857579556323  |
| C                                                | 6.26359406065074  | 2.66352218170274  | 2.30980852984481  | H  | -0.23955632685706 | 2.78196343258085  | -1.54679777925770 |
| C                                                | 5.00674760709460  | 1.22749917508429  | 3.77522311397934  | N  | 3.82407118771125  | 1.08434945933853  | 0.93899991270104  |
| C                                                | 6.49464585278342  | 3.54273153448972  | 3.36675844462901  | H  | 3.86197921230707  | 1.95311069984149  | 0.38827120056386  |
| H                                                | 6.65125813750654  | 2.90759811990131  | 1.32019409854772  | Rh | 1.08460103091326  | 3.51896551349748  | 1.53194541804483  |
| C                                                | 5.23436694088994  | 2.10744532041022  | 4.83208486700080  | C  | 0.31583771510272  | 5.10093598896827  | 2.73776401205292  |
| H                                                | 4.40258281822867  | 0.33393340945744  | 3.93125843351261  | C  | -0.40864106999309 | 6.14531833143816  | 2.15283878932073  |
| C                                                | 5.98134527107142  | 3.26901827541685  | 4.63357053885295  | C  | -1.43661193977766 | 6.79321925055443  | 2.83390073707652  |
| H                                                | 7.07583419564293  | 4.45219851224835  | 3.19358126561834  | C  | -1.73515334982961 | 6.40586000935576  | 4.14130507894365  |
| H                                                | 4.82159440739545  | 1.88268142866310  | 5.81893076670111  | C  | -1.01860386481145 | 5.38058281321315  | 4.75203810971241  |
| H                                                | 6.16057017844863  | 3.95848347534093  | 5.46242934814785  | C  | 0.01743922590193  | 4.71985498673077  | 4.07357196876761  |
| <b>TS26 -311.50 cm** -1 ***imaginary mode***</b> |                   |                   |                   |    |                   |                   |                   |
| H                                                | 0.11703939916551  | -0.81256210382753 | 0.49561459550999  | H  | -2.53288981405272 | 6.90702093899359  | 4.69588684013615  |
| C                                                | -0.86359069412611 | 2.93855715703269  | 0.53463528005376  | H  | -1.25318515431170 | 5.07727384798370  | 5.77660918897000  |
| C                                                | -0.14918409758670 | 2.22876932824287  | -0.60311125346778 | C  | 3.05515923660914  | 5.85030548947145  | 0.19129167301171  |
| C                                                | 1.28139526096326  | 2.16911040555500  | -0.12018245114712 | C  | 2.46031134750226  | 6.36983420996193  | 1.49744352884359  |
| H                                                | 2.11333878864031  | 2.38318005055152  | -0.79710841016961 | C  | 3.44009043827203  | 4.42147169445829  | 0.55435313911614  |
| C                                                | 1.42650428887129  | 1.46159863091377  | 1.07983056423643  | C  | 2.26143633823290  | 5.22737203260622  | 2.46705565357622  |
| C                                                | 0.09612455640183  | 0.99610189840907  | 1.64020391519648  | C  | 3.03044845354394  | 4.12766519533518  | 1.92040056279406  |
| C                                                | -0.70232053679819 | 2.28028368131341  | 1.74470525526730  | H  | 2.37477476603155  | 5.48510791383804  | 3.52409422157221  |
| H                                                | -1.32051865407137 | 2.51061867629145  | 2.61716647039850  | H  | 3.55190322881813  | 3.38453690303057  | 2.52745734443918  |
| C                                                | -0.71221365461088 | 0.79369403802348  | -0.72385430422595 | O  | 2.25110085207018  | 7.53221771679518  | 1.74446854004529  |
| H                                                | -0.18512355741367 | 0.27068598513307  | -1.53581037681674 | O  | 4.03980924675318  | 3.67335936917329  | -0.21654898661694 |
| H                                                | -1.76965820173022 | 0.86658890531482  | -1.02381931246735 | C  | 2.01759357348599  | 5.90422827241897  | -0.92987498724800 |
| C                                                | -0.57542704089940 | 0.03953646419862  | 0.61808804847083  | H  | 2.44391277282524  | 5.46953625110868  | -1.84610239915725 |
| C                                                | -1.88375580523920 | 3.98446142972873  | 0.24757464439443  | H  | 1.11499040174546  | 5.32970378939955  | -0.66447832254858 |
| H                                                | -2.69728227651076 | 3.53802574773440  | -0.35078649828338 | H  | 1.72835918843770  | 6.94616760498551  | -1.13290582290740 |
| H                                                | -1.45950553356762 | 4.80741876478386  | -0.34744666994658 | C  | 4.31234897062426  | 6.65547740255944  | -0.20816768402914 |
| H                                                | -2.31337392866996 | 4.39794950936033  | 1.16923709810896  | H  | 4.55459804939924  | 6.39368021233638  | -1.24852378838129 |
| C                                                | -1.91729257011819 | -0.52161550345746 | 1.11685074335019  | H  | 4.03058244345078  | 7.72028941250307  | -0.19277513618114 |
| H                                                | -2.63764778676893 | 0.31881423692071  | 1.12673564523793  | C  | 5.52139165093126  | 6.41296609282726  | 0.65776485400497  |
| C                                                | -2.44394243052706 | -1.58334933753935 | 0.15542822837893  | C  | 5.67266940873235  | 7.04478794529968  | 1.89941935592948  |
| H                                                | -2.54454510333959 | -1.20106536043203 | -0.87149130099792 | C  | 6.51950122827827  | 5.52255328769898  | 0.23920805649241  |
| H                                                | -3.43218123346507 | -1.94962747604954 | 0.47441679432418  | C  | 6.78724380834354  | 6.79016798252253  | 2.69914057544952  |
| H                                                | -1.75983410144428 | -2.44831391195354 | 0.12433472182665  | H  | 4.91372618009921  | 7.75436506935888  | 2.23913178501788  |
| C                                                | -1.83334317790953 | -1.08917678019809 | 2.53021745154846  | C  | 7.63462594733343  | 5.26595144055953  | 1.03491852771225  |
| H                                                | -1.04315242393074 | -1.85607582793482 | 2.59965883196771  | H  | 6.41232475631589  | 5.01602459788579  | -0.72314990958677 |

|                    |                  |                   |                   |   |                    |                   |                   |
|--------------------|------------------|-------------------|-------------------|---|--------------------|-------------------|-------------------|
| C                  | 7.77215754372618 | 5.89997955324722  | 2.27016296472815  | C | 0.99551643877470   | 2.02405035392220  | -0.48155150529984 |
| H                  | 6.89018891181098 | 7.29679654997701  | 3.66232666213134  | C | 0.54038175386651   | 1.72098560493476  | 0.93756566579366  |
| H                  | 8.39903214642799 | 4.56567601974974  | 0.68770980231142  | C | -0.88973378718642  | 1.24286155662633  | 0.90766001611486  |
| H                  | 8.64651161025647 | 5.70344428772880  | 2.89590597807209  | H | -1.62934431604218  | 1.63573991355086  | 1.59387776443949  |
| N                  | 0.77803264214894 | 3.76080374389000  | 4.70628682840698  | C | -1.09851713472822  | 0.23445769887292  | 0.05939564063118  |
| H                  | 1.17170054292314 | 3.03794434805089  | 4.11040931142176  | C | 0.14795132081329   | -0.20390162044247 | -0.67729229224159 |
| H                  | 0.41320598201067 | 3.39894069166717  | 5.58006537221946  | C | 0.78619635168937   | 1.00729092773613  | -1.31379524264925 |
| C                  | 6.15809809686230 | 0.97235510435545  | 0.28151094463066  | H | 1.07737959664728   | 1.01042740054506  | -2.35654954452312 |
| C                  | 7.51324919924700 | 1.0888862053392   | 0.61154717935936  | C | 1.39299501779036   | 0.48666399676167  | 1.39685193008997  |
| C                  | 5.78293769830071 | 1.13275672405756  | -1.05605728275948 | H | 1.1418422303622    | 0.23475132685150  | 2.42779708682312  |
| C                  | 8.46319767654922 | 1.38646178041195  | -0.36316616295114 | H | 2.44537648200759   | 0.77542952140697  | 1.37994284974892  |
| H                  | 7.83602885214410 | 0.95373386345854  | 1.64548278468221  | C | 1.13518434717508   | -0.70754608688680 | 0.4451793053859   |
| C                  | 6.73137863563363 | 1.43383672292945  | -2.03276020024375 | C | 1.6509777576819    | 3.32659194988276  | -0.79768950373139 |
| H                  | 4.73733800326416 | 1.02057032986587  | -1.34780489472318 | H | 2.53889658139147   | 3.48104862816895  | -0.17552444366306 |
| C                  | 8.07621221718505 | 1.56736941248456  | -1.69121555965866 | H | 0.97783499359359   | 4.16657301763443  | -0.59742248194599 |
| H                  | 9.51474775573242 | 1.47891050804603  | -0.07961997855786 | H | 1.95621647229961   | 3.37534174820860  | -1.84368483194282 |
| H                  | 6.41248101434419 | 1.56276758911596  | -3.07024799269266 | C | 2.43827347461023   | -1.31528715129194 | -0.10294476303143 |
| H                  | 8.81980631377792 | 1.80571572614892  | -2.45586511653172 | H | 3.02097626234046   | -0.50174405169006 | -0.55009479695855 |
| C                  | 5.15345291677700 | -0.97459929800645 | 1.29049619136729  | C | 3.26460312377922   | -1.92176360366382 | 1.03669159899842  |
| C                  | 6.16393502825995 | -1.68761591565480 | 1.94503759772972  | H | 3.48652980882044   | -1.19227000307779 | 1.81723788549130  |
| C                  | 4.26127336669533 | -1.67919071219137 | 0.47680415802386  | H | 4.21526311325561   | -2.30964812586971 | 0.66443045221289  |
| C                  | 6.26102312321400 | -3.07212823510953 | 1.81470072830770  | H | 2.72625233289865   | -2.75262330697554 | 1.50203839298319  |
| H                  | 6.89138122204032 | -1.15966017470878 | 2.56499166829330  | C | 2.18813733061116   | -2.37292009127129 | -1.18052955377957 |
| C                  | 4.35618084901327 | -3.06336214390820 | 0.34459568923867  | H | 1.50700148091213   | -3.14755244562270 | -0.81748997420947 |
| H                  | 3.48424106824546 | -1.13795681032750 | -0.06622230753346 | H | 3.12443438353956   | -2.85857649323324 | -1.46422320182485 |
| C                  | 5.35399297505861 | -3.76878861170566 | 1.01683648424592  | H | 1.75382376758805   | -1.94624565170548 | -2.08493833675210 |
| H                  | 7.05540257299730 | -3.60833196494238 | 2.34040365812317  | C | -2.34527607758513  | -0.55424952299943 | -0.09058346239784 |
| H                  | 3.64247317973934 | -3.59390028067233 | -0.29114970476548 | C | -4.79028283796578  | -0.56838919611608 | 0.04371723493111  |
| H                  | 5.42766796413919 | -4.85451815404570 | 0.91538996093450  | O | -2.32262886013110  | -1.73104287947027 | -0.43143698910351 |
| C                  | 5.45041919888940 | 1.15244142125223  | 2.72231231126320  | H | -0.08506778797841  | -0.99771650981891 | -1.37771067770806 |
| C                  | 5.90757956629422 | 2.47432427426473  | 2.80497389286360  | H | 0.68745613589335   | 2.56587083991790  | 1.60927832732349  |
| C                  | 5.17363020747744 | 0.47073901827752  | 3.91102175373557  | N | -3.50912172799483  | 0.09425285150551  | 0.19678287896337  |
| C                  | 6.10143510461341 | 3.09272887602995  | 4.03774530258915  | H | -3.48520999578056  | 1.09713069281613  | 0.25517604028450  |
| H                  | 6.10929577681717 | 3.03813415945294  | 1.89175695136619  | H | -5.56099549630321  | 0.03399595869994  | 0.52293900306980  |
| C                  | 5.36785102290227 | 1.08665848524906  | 5.14793213534933  | H | -5.05305053384522  | -0.71655277047956 | -1.00782419365939 |
| H                  | 4.78912525928588 | -0.54791065962258 | 3.87190716854671  | H | -4.75333167105722  | -1.54678393129523 | 0.51956992630826  |
| C                  | 5.83516332343463 | 2.3980008247947   | 5.21781044555764  |   |                    |                   |                   |
| H                  | 6.46082541896673 | 4.12411816240516  | 4.06857554763190  |   | <b>Ligand R=Et</b> |                   |                   |
| H                  | 5.14758278233063 | 0.53340839031521  | 6.06464937830430  | H | 0.70217874143319   | -1.56085621370522 | 0.87332340524497  |
| H                  | 5.98942812161849 | 2.87798604727513  | 6.18760318988902  | C | 1.58066775358704   | 1.96508049971792  | -0.35518252456693 |
|                    |                  |                   |                   | C | 0.98217955800132   | 1.64321205315782  | 1.00539128531664  |
|                    |                  |                   |                   | C | -0.48333514505598  | 1.32767560296013  | 0.83558376654543  |
| <b>Ligand R=Me</b> |                  |                   |                   | H | -1.23143086447991  | 1.76802919562047  | 1.48295473352024  |
| H                  | 0.60672145019608 | -1.49782678613234 | 0.98507186767575  |   |                    |                   |                   |

|                     |                   |                   |                   |                     |                   |                   |                   |
|---------------------|-------------------|-------------------|-------------------|---------------------|-------------------|-------------------|-------------------|
| C                   | -0.72504273964722 | 0.39174950149991  | -0.08379939425872 | C                   | 0.83980766445100  | -0.12320718349726 | -0.74099400729998 |
| C                   | 0.52625898197023  | -0.14610446573141 | -0.74296210727051 | C                   | 1.56216160525773  | 1.10674393019988  | -1.23490054260097 |
| C                   | 1.33829979995552  | 1.01797962751178  | -1.25772535248241 | H                   | 1.90847633416680  | 1.18623485945374  | -2.25758035183435 |
| H                   | 1.71093609266023  | 1.04216932481128  | -2.27393033163257 | C                   | 1.99622743455479  | 0.32944190920269  | 1.44659352825824  |
| C                   | 1.65866672880026  | 0.30250931334072  | 1.45783036056752  | H                   | 1.68123922625475  | 0.00387598054700  | 2.43868465823087  |
| H                   | 1.29724097883622  | 0.03055074590887  | 2.45020701453279  | H                   | 3.05937539352730  | 0.56924861940161  | 1.50516284371833  |
| H                   | 2.73335161509170  | 0.47458576714849  | 1.53893743667628  | C                   | 1.73729904762744  | -0.76766960857812 | 0.38455715666021  |
| C                   | 1.35572761595900  | -0.80911056426906 | 0.42280305310351  | C                   | 2.48174980448346  | 3.33629974512023  | -0.47751676751485 |
| C                   | 2.38005082420436  | 3.20940823458510  | -0.55002612760747 | H                   | 2.83766811044890  | 3.46278466350536  | -1.50073833528615 |
| H                   | 1.77623891805795  | 4.10082889085258  | -0.35071365882677 | H                   | 3.34424566413256  | 3.40232707300828  | 0.19423676606893  |
| H                   | 2.76501289939033  | 3.27928340762138  | -1.56817059231692 | H                   | 1.82971695622844  | 4.18176143493960  | -0.23483909911946 |
| H                   | 3.23041330935316  | 3.24610579211431  | 0.13923267664841  | C                   | 3.03731195797704  | -1.39714456780984 | -0.14530730024048 |
| C                   | 2.62687259217451  | -1.53168067962971 | -0.05760596725620 | H                   | 3.67876452730061  | -0.58277187663100 | -0.50141517083620 |
| H                   | 3.32447734794073  | -0.76774614469984 | -0.41971140682751 | C                   | 3.77414370366745  | -2.12974991052371 | 0.98141097652022  |
| C                   | 3.29284814105034  | -2.27439493572174 | 1.10587848196041  | H                   | 3.99103443820557  | -1.47447769752871 | 1.82639556660514  |
| H                   | 3.53077915786346  | -1.60935174782694 | 1.93751332437612  | H                   | 4.72243633910407  | -2.53821612647711 | 0.62543762131871  |
| H                   | 4.2220944818143   | -2.74893676773391 | 0.78348374295459  | H                   | 3.17213847780686  | -2.96398421027499 | 1.35327168999337  |
| H                   | 2.63402484590749  | -3.06035257515633 | 1.48677149506365  | C                   | 2.79235272256121  | -2.35893589892688 | -1.31071219300729 |
| C                   | 2.35099127393226  | -2.50998880266824 | -1.20214482622803 | H                   | 2.05702586299078  | -3.12141763093307 | -1.03933513188284 |
| H                   | 2.03453143580567  | -2.00215258888990 | -2.11347469748924 | H                   | 3.71760819146448  | -2.87029846574587 | -1.58541214410610 |
| H                   | 1.56636752352036  | -3.22030737301121 | -0.92730120799756 | H                   | 2.42544885007211  | -1.84622054515767 | -2.20010819049972 |
| H                   | 3.25023617261978  | -3.08207740491894 | -1.44109043737087 | C                   | -1.69085768132500 | -0.41792568395657 | -0.30720213946714 |
| C                   | -2.03118432932735 | -0.24654886863153 | -0.37672596447186 | C                   | -4.15851521774042 | -0.35637535133627 | -0.18785132691433 |
| C                   | -4.48032565362779 | 0.00566571685033  | -0.37224398093915 | O                   | -1.68312079323527 | -1.57237076281422 | -0.72245476283818 |
| O                   | -2.10205335236661 | -1.41115442622699 | -0.75448009066666 | H                   | 0.61430085092357  | -0.84381496473018 | -1.51862960145005 |
| H                   | 0.27112233289971  | -0.87587747188756 | -1.50267990864350 | H                   | 1.36672688220885  | 2.41327755691720  | 1.80424612956995  |
| H                   | 1.16089562121294  | 2.43328382428127  | 1.73376122452081  | N                   | -2.84215873359381 | 0.26263389600167  | -0.06524477994755 |
| N                   | -3.13454774903720 | 0.52933554032117  | -0.19855822990749 | H                   | -2.78038584940137 | 1.22493056872419  | 0.22031013708254  |
| H                   | -3.00533435733622 | 1.49550320625836  | 0.04405071625429  | C                   | -4.51340538394519 | -1.15184290495134 | 1.06872336679517  |
| C                   | -5.01985082499301 | -0.68153883633512 | 0.87904511669566  | C                   | -5.19318784871187 | 0.71637163743545  | -0.50563075829301 |
| H                   | -5.12565869986834 | 0.83597286627077  | -0.66527769754271 | H                   | -4.08731827429136 | -1.05290212714762 | -1.02525900741099 |
| H                   | -4.45069430217527 | -0.70329161115020 | -1.20002259219323 | H                   | -4.59157711542690 | -0.49102833626111 | 1.93618077132175  |
| H                   | -4.37820403750819 | -1.51867099813233 | 1.15531904425606  | H                   | -5.46981472868883 | -1.66413446029010 | 0.94206133159770  |
| H                   | -5.06595212917153 | 0.01266082465901  | 1.72106207335764  | H                   | -3.74801652579080 | -1.90134539723696 | 1.26902812449713  |
| H                   | -6.02624293294458 | -1.06634384916551 | 0.69868289490126  | H                   | -6.18025746073937 | 0.26815394058858  | -0.62589953645053 |
| <b>Ligand R=iPr</b> |                   |                   |                   | H                   | -5.26023421494198 | 1.44828150359702  | 0.30535358858645  |
| H                   | 1.14117827397628  | -1.57075067584562 | 0.82594011195321  | H                   | -4.94268805141128 | 1.24477063841848  | -1.42708576250777 |
| C                   | 1.76525376114310  | 2.03893741613975  | -0.30745076626396 | <b>Ligand R=nBu</b> |                   |                   |                   |
| C                   | 1.22203665405993  | 1.63640690860588  | 1.05444680632755  | H                   | 1.13324212206770  | -1.57077537183655 | 0.73257956531227  |
| C                   | -0.22329613969981 | 1.22921479027401  | 0.90880264032589  | C                   | 2.32675499160816  | 1.96796394094468  | -0.13727199086562 |
| H                   | -0.98109036530580 | 1.59609299618213  | 1.58987073146944  | C                   | 1.46634731769592  | 1.61148891930360  | 1.06496010019362  |
| C                   | -0.42661670034601 | 0.30821371839148  | -0.03465113112890 | C                   | 0.05437491800211  | 1.35365933809666  | 0.60124159428371  |

|   |                   |                   |                   |                     |                   |                   |                   |
|---|-------------------|-------------------|-------------------|---------------------|-------------------|-------------------|-------------------|
| H | -0.79293616681587 | 1.79358371185081  | 1.11235603002128  | <b>Ligand R=tBu</b> |                   |                   |                   |
| C | -0.02918157515542 | 0.46496979384272  | -0.39009389930923 | H                   | -1.39255343746208 | -1.49854872704645 | -0.97109814933641 |
| C | 1.312180692229698 | -0.08714747172123 | -0.82078296136545 | C                   | -2.03857686142655 | 1.99834434031747  | 0.46242219488392  |
| C | 2.23827549214186  | 1.06870087796115  | -1.11382286485958 | C                   | -1.54351524982428 | 1.71534903840166  | -0.94712728852978 |
| H | 2.80187806464890  | 1.12171190855978  | -2.03669764110192 | C                   | -0.08535990183861 | 1.33311847944362  | -0.89157730960532 |
| C | 2.00829750160315  | 0.23131512153031  | 1.57595224515309  | H                   | 0.63663930539138  | 1.76893293227954  | -1.57073182059587 |
| H | 1.45597950681620  | -0.06919428151667 | 2.46701095931374  | C                   | 0.17676217350880  | 0.34725949675727  | -0.03206358153473 |
| H | 3.05119319880407  | 0.36331556659031  | 1.86952198228272  | C                   | -1.04959695400586 | -0.16758808591892 | 0.6889241359694   |
| C | 1.88218792139126  | -0.82568762989882 | 0.45116476539608  | C                   | -1.77590099921843 | 1.00339989099439  | 1.30585802086996  |
| C | 3.18420726171648  | 3.1885706558389   | -0.11117735499390 | H                   | -2.08211724754690 | 0.99532942809422  | 2.34430511437701  |
| H | 3.88539736580811  | 3.16039223512280  | 0.72963529438666  | C                   | -2.30636195165954 | 0.42461201820114  | -1.40847878792328 |
| H | 2.57918566851690  | 4.09236356016277  | 0.01518842438257  | H                   | -2.02561725650970 | 0.18331573723763  | -2.43432613676516 |
| H | 3.76124272514440  | 3.28990589878382  | -1.03118114628307 | H                   | -3.37582035609011 | 0.64267998364631  | -1.40666091739771 |
| C | 3.20331237369832  | -1.57167441311985 | 0.19383345518094  | C                   | -1.98260669998138 | -0.74367594906519 | -0.44475435208075 |
| H | 3.97970151087362  | -0.81826929524550 | 0.01727394769203  | C                   | -2.78112812573083 | 3.25799148420120  | 0.75836145737569  |
| C | 3.60211435414320  | -2.39062839172732 | 1.42625322862713  | H                   | -3.66928345370177 | 3.34878408381224  | 0.12408498526379  |
| H | 3.69350192749546  | -1.77219212003139 | 2.32064772909138  | H                   | -2.16131847674362 | 4.13807798606780  | 0.55797784395840  |
| H | 4.56062861896581  | -2.88987549455105 | 1.26857896842215  | H                   | -3.10174288302588 | 3.29635217497741  | 1.80017997525995  |
| H | 2.85502842198286  | -3.16299258215133 | 1.63092783666999  | C                   | -3.25021037913646 | -1.43584011547489 | 0.08652712818503  |
| C | 3.13730749112435  | -2.48381588456890 | -1.03298511624452 | H                   | -3.89674672229449 | -0.66053505621426 | 0.51339076162524  |
| H | 2.29926439788761  | -3.18245433943093 | -0.95815709175173 | C                   | -4.00789036354497 | -2.11107184726761 | -1.06225977228926 |
| H | 4.05382098913187  | -3.07132293687962 | -1.12185223627723 | H                   | -4.26279778040094 | -1.40738446752827 | -1.85626125187127 |
| H | 3.01847305419303  | -1.92139887353053 | -1.95935080418356 | H                   | -4.93688760386519 | -2.56102708842421 | -0.70548111782660 |
| C | -1.26975743642809 | -0.11651541155574 | -0.95775179816201 | H                   | -3.40168518413258 | -2.90681137510463 | -1.50480446009603 |
| C | -3.66825584098801 | 0.21058305835832  | -1.40431930382141 | C                   | -2.94908792363065 | -2.46278785137337 | 1.18064623484134  |
| O | -1.29209447358666 | -1.25712684946188 | -1.40807863693000 | H                   | -2.20604625135362 | -3.18975132630718 | 0.84123446119359  |
| H | 1.19152006100284  | -0.77507791578413 | -1.64971978447910 | H                   | -3.85447655523966 | -3.01163176355765 | 1.44916324325934  |
| H | 1.51921995383664  | 2.36479237358363  | 1.85007312227440  | H                   | -2.56692624917029 | -1.99768180652863 | 2.08973257850556  |
| N | -2.37148471289360 | 0.68085838867377  | -0.94152290778803 | C                   | 1.46949117968626  | -0.36604668557692 | 0.13186680836515  |
| H | -2.26715551820126 | 1.63189775933404  | -0.63728579741995 | C                   | 3.97527635148097  | -0.10507430030734 | -0.02811537077004 |
| C | -4.43243533885215 | -0.59879728190332 | -0.35618633427493 | O                   | 1.49595671984491  | -1.55613744524190 | 0.43005514724457  |
| H | -4.24833401788394 | 1.08629797091272  | -1.70484728979605 | H                   | -0.77749216919845 | -0.94029683569529 | 1.39885509309617  |
| H | -3.50237022385701 | -0.40371743142494 | -2.29002900036728 | H                   | -1.73550984836051 | 2.54392702688820  | -1.62783263295328 |
| C | -4.78322959550347 | 0.19242128280757  | 0.90141934457639  | N                   | 2.58385345445748  | 0.38164233232900  | -0.08709060854211 |
| H | -5.35038885005272 | -0.97418454021337 | -0.82131295799105 | H                   | 2.44719083401968  | 1.37312542430862  | -0.18401132473636 |
| H | -3.83462537641926 | -1.47541516961281 | -0.09313137755253 | C                   | 4.30142883577971  | -0.61243434321242 | 1.38284287267978  |
| C | -5.54973372752306 | -0.63782778654912 | 1.92852822708478  | C                   | 4.18443142655432  | -1.21748350719301 | -1.06259622649234 |
| H | -3.86393732939638 | 0.57297542630593  | 1.35680165496485  | C                   | 4.86235593150314  | 1.09398297133905  | -0.37121910324471 |
| H | -5.37767298241608 | 1.07091677571526  | 0.62396176426177  | H                   | 5.91302770368290  | 0.80452134674435  | -0.34386108210207 |
| H | -4.96490127642741 | -1.50452559093940 | 2.24629142333638  | H                   | 4.64129984532311  | 1.46990304376535  | -1.37295082584512 |
| H | -5.78849604640578 | -0.05233296001225 | 2.81883199597646  | H                   | 4.72000370869244  | 1.90629660511405  | 0.34645697124105  |
| H | -6.48961241379159 | -1.00963550035792 | 1.51257554693377  | H                   | 5.22435124812027  | -1.54986034702276 | -1.04561039986179 |
|   |                   |                   |                   | H                   | 3.54170427645113  | -2.06851814732731 | -0.84764778748227 |

|                      |                   |                   |                   |                    |                   |                   |                   |
|----------------------|-------------------|-------------------|-------------------|--------------------|-------------------|-------------------|-------------------|
| H                    | 3.95659525301495  | -0.85257850367914 | -2.06604453186547 | C                  | -4.35544208204960 | 1.34258908590573  | -1.83228371395968 |
| H                    | 5.33911725535924  | -0.94933783324489 | 1.42912976527033  | H                  | -5.64976705758919 | 0.10971049773835  | -0.62433591448523 |
| H                    | 4.16646062066957  | 0.18489236222476  | 2.11669266997583  | H                  | -4.71021251993995 | 1.26008429304993  | 0.29709333494925  |
| H                    | 3.65139042155303  | -1.44368602883306 | 1.64856227867912  | H                  | -5.09988793411223 | 2.12130766124091  | -2.00831154764430 |
| <b>Ligand R=CHE2</b> |                   |                   |                   |                    |                   |                   |                   |
| H                    | 1.78554457096258  | -1.72287167025837 | 0.51099772594154  | H                  | -5.02098912822585 | -1.96439022204309 | 0.56398920680423  |
| C                    | 2.13928573366302  | 2.07267216178613  | 0.08241697758407  | H                  | -3.33930441620854 | -2.28420957981160 | 0.93861571489145  |
| C                    | 1.66350881421254  | 1.38478047993050  | 1.35242311395885  | C                  | -4.25994145599441 | -0.83127889264439 | 2.23780109575409  |
| C                    | 0.24129643113683  | 0.92122624319125  | 1.15716309631776  | H                  | -4.52118142154588 | -1.57539778946820 | 2.99224779761120  |
| H                    | -0.51801352036193 | 1.10952579538320  | 1.90596303089511  | H                  | -3.33622125958452 | -0.34781119183239 | 2.56400172163893  |
| C                    | 0.06533950328482  | 0.18370808267194  | 0.05985719404231  | H                  | -5.05151890791641 | -0.07914390574214 | 2.23367703726055  |
| C                    | 1.33401585473109  | -0.02475005899283 | -0.73832389693789 | <b>Ligand R=Cy</b> |                   |                   |                   |
| C                    | 1.96321908846419  | 1.32246252162652  | -1.00235078187847 | H                  | -2.16294845032705 | -1.42525515463190 | -1.13190042165471 |
| H                    | 2.27263344366070  | 1.61653001526370  | -1.99731698087981 | C                  | -2.69084141230938 | 1.92565294983009  | 0.65634867891634  |
| C                    | 2.52591781836357  | 0.08094737548070  | 1.47469759059261  | C                  | -2.27802712044424 | 1.77394635751350  | -0.79941918736640 |
| H                    | 2.25682267235198  | -0.44815404560580 | 2.38957088991741  | C                  | -0.82288110013027 | 1.38201479581010  | -0.86090983858829 |
| H                    | 3.57366858529762  | 0.37317371452786  | 1.56403411907744  | H                  | -0.13365789855488 | 1.87852575618719  | -1.53226456824995 |
| C                    | 2.30817313536609  | -0.80644996561109 | 0.22408720581793  | C                  | -0.52327801180495 | 0.31836530756912  | -0.11375954000725 |
| C                    | 2.77093187888702  | 3.42256572408598  | 0.15087906272893  | C                  | -1.71293978544624 | -0.25726212319160 | 0.62232878519850  |
| H                    | 3.08163384192379  | 3.76717602912259  | -0.83623514515669 | C                  | -2.39122166920025 | 0.85468104233855  | 1.38686744636361  |
| H                    | 3.65197029945558  | 3.41416153924509  | 0.80145215690933  | H                  | -2.63802295213444 | 0.75045024678083  | 2.43587820151159  |
| H                    | 2.07918601699875  | 4.16080104790982  | 0.56958158148525  | C                  | -3.07829163669833 | 0.53625080197633  | -1.33580217729902 |
| C                    | 3.63411531876256  | -1.21929109002943 | -0.44010730755786 | H                  | -2.85688187486283 | 0.39061715035948  | -2.39371956401784 |
| H                    | 4.21073001083124  | -0.30514084941489 | -0.62223176295960 | H                  | -4.14351605535963 | 0.75946527759570  | -1.25413963822414 |
| C                    | 4.44495225932848  | -2.11598291431943 | 0.50156230155565  | C                  | -2.71434857964734 | -0.71920700742582 | -0.50520607983972 |
| H                    | 4.64292941547068  | -1.63516551085700 | 1.46105545147865  | C                  | -3.39926727980520 | 3.15744266593191  | 1.11126067156349  |
| H                    | 5.40757056598619  | -2.37779505566254 | 0.05681336172393  | H                  | -4.32004745889065 | 3.31697541785402  | 0.54011630021997  |
| H                    | 3.90743392094365  | -3.04759909289397 | 0.70149869196900  | H                  | -2.77923092082430 | 4.04732988533015  | 0.96085862707949  |
| C                    | 3.42829248108532  | -1.93001340793932 | -1.77971887245656 | H                  | -3.66131594264442 | 3.09913118564071  | 2.16845578991499  |
| H                    | 2.75417781662019  | -2.78388435976882 | -1.66934523024375 | C                  | -3.95779254336727 | -1.44985533791391 | 0.03141999063669  |
| H                    | 4.37968319014913  | -2.30365534639629 | -2.16477791513849 | H                  | -4.56592525142543 | -0.71496680933603 | 0.57133977880351  |
| H                    | 3.00593667541263  | -1.26887343973274 | -2.53686484262945 | C                  | -4.79393891865685 | -2.00212313184608 | -1.12808692498749 |
| C                    | -1.17091207860449 | -0.53584688593279 | -0.33507695386472 | H                  | -5.70328241598977 | -2.48132971564819 | -0.75892391527431 |
| C                    | -3.64594287604077 | -0.53721831505461 | -0.25385810503043 | H                  | -4.22708371271641 | -2.75224073989321 | -1.68747441978010 |
| O                    | -1.12291198535317 | -1.59823119388036 | -0.94641583145908 | H                  | -5.09167614612602 | -1.22127403143498 | -1.82978117343008 |
| H                    | 1.12912216891963  | -0.59806408291754 | -1.63529897338303 | C                  | -3.60512892407003 | -2.58069193822964 | 1.00010290608420  |
| H                    | 1.78337558033118  | 2.01321370932974  | 2.23411561667435  | H                  | -3.15748209765685 | -2.20843282314136 | 1.92184539902724  |
| N                    | -2.34175928372177 | 0.05421383431498  | 0.02387284118167  | H                  | -4.50066123481109 | -3.14284505805542 | 1.27403441748867  |
| H                    | -2.29915212942940 | 0.96388229104009  | 0.44991640475830  | H                  | -2.89823083928908 | -3.27973830999174 | 0.5447225591368   |
| C                    | -4.08447746704942 | -1.48834656184266 | 0.87073818733139  | C                  | 0.77514734358114  | -0.39822445275309 | -0.0748566604072  |
| C                    | -4.66028496900793 | 0.56903536228629  | -0.55134885511731 | O                  | 0.83073161253058  | -1.60654611425308 | 0.12847019714055  |
| H                    | -3.51075391191085 | -1.14117730615435 | -1.15371110613699 |                    |                   |                   |                   |



|                      |                   |                   |                    |   |                   |                   |                   |
|----------------------|-------------------|-------------------|--------------------|---|-------------------|-------------------|-------------------|
| H                    | -1.40911439645386 | -1.09374008182239 | 1.24140157953602   | C | 3.85439534791821  | 0.60171122533839  | -2.17113240744542 |
| H                    | -2.49879470765202 | 2.66369461647756  | -1.38789720846342  | C | 3.84162688798085  | -0.93405374956176 | -2.11371038674416 |
| N                    | 1.88245932635508  | 0.36126388805483  | -0.30064070560101  | C | 5.16311934810515  | -1.56221659494604 | -1.65234414530814 |
| H                    | 1.77780422047704  | 1.36178562799697  | -0.26829303200470  | C | 5.54980625175772  | -1.24197262712354 | -0.20247916419628 |
| C                    | 5.18499609751007  | -0.86643321767397 | 1.19021226561960   | C | 4.59714576927971  | -1.81313612712703 | 0.85354504483272  |
| C                    | 3.75947545711363  | -0.31153079069085 | 1.17142953558705   | C | 4.78332645821029  | -1.19599168886947 | 2.24647545420497  |
| C                    | 3.22905917246517  | -0.19039432236699 | -0.26186579848593  | C | 4.28365413302627  | 0.25120413828618  | 2.34996052083316  |
| C                    | 4.16315439093367  | 0.65331456870647  | -1.12853331061492  | H | -4.39613878599131 | 2.03807398187591  | -1.87162496125767 |
| C                    | 5.59271470851390  | 0.10742422266890  | -1.10432753136922  | H | -1.90644829065233 | 1.91348580797659  | -1.98774635158460 |
| C                    | 6.12370165613429  | -0.02291508088754 | 0.32501106163461   | H | -2.31853285287677 | -0.72574493047291 | 1.33275638236103  |
| H                    | 5.17437746641234  | -1.89598752030811 | 0.81534283947999   | H | -4.01823281155246 | 0.90056331998252  | 2.23480093995924  |
| H                    | 5.55399073938114  | -0.91453986152606 | 2.21774598586152   | H | -4.09967875894719 | -0.39154256718629 | -2.43706403888549 |
| H                    | 3.74340826861656  | 0.68129030861919  | 1.63695323111793   | H | -5.44656141426789 | -0.18566881367436 | -1.32618281054988 |
| H                    | 3.08582338638419  | -0.94961480885685 | 1.74536145382957   | H | -2.93978294329454 | -1.68384446973525 | -0.90258997190464 |
| H                    | 3.15758022179232  | -1.19551000441702 | -0.68354803682668  | H | -6.33408414782490 | 2.51458130680893  | -0.00653880917383 |
| H                    | 3.78104910102998  | 0.68784352060809  | -2.15188235319318  | H | -5.64536452143266 | 2.79215676401799  | 1.60020523666183  |
| H                    | 4.16463761240131  | 1.68474900471481  | -0.75243103610257  | H | -5.05651597372692 | 3.70224510386456  | 0.19977031980327  |
| H                    | 5.60712166525721  | -0.87656717829162 | -1.58599115620249  | H | -5.45284061907057 | -1.35378362948365 | 0.75682175970810  |
| H                    | 6.24644117320914  | 0.75272710606906  | -1.69652824166495  | H | -3.13835233563539 | -3.32518491716796 | 1.10300555896392  |
| H                    | 6.22127768927379  | 0.97601701367279  | 0.76601504466378   | H | -3.68975995276306 | -2.13720335516728 | 2.28400800843104  |
| H                    | 7.12606984792655  | -0.45876542371892 | 0.31502126209653   | H | -4.71802008223902 | -3.50420403327236 | 1.87200705723145  |
| <b>Ligand R=Cy12</b> |                   |                   |                    |   |                   |                   |                   |
| C                    | -4.38421031153280 | 1.66697653405907  | 0.27815208272833   | H | -4.55395925271417 | -3.59980064599997 | -1.11789702754252 |
| C                    | -3.93947125069536 | 1.36731799919094  | -1.14485047595236  | H | 2.04865871515602  | 0.07420675424756  | -0.27312492131260 |
| C                    | -2.43285136988604 | 1.38309000857522  | -1.20425513548027  | H | 0.05786307931600  | 2.16238318844538  | -0.81090635259071 |
| C                    | -1.85355802609138 | 0.60003775568780  | -0.29308835422444  | H | 2.20415751039990  | 3.07898665885691  | 0.16094306646545  |
| C                    | -2.83979599856000 | -0.13240755026891 | 0.59027665102778   | H | 3.61977044465357  | 2.06439674034325  | 0.22705950392895  |
| C                    | -3.80409852960701 | 0.87223578633101  | 1.17386363858016   | H | 1.15667750947310  | 1.78827656148716  | 2.01653878519518  |
| C                    | -4.36068509883000 | -0.11915965573926 | -1.41373691512989  | H | 2.66945825994460  | 2.53570113473057  | 2.48235071691750  |
| C                    | -3.66788691399971 | -1.05066176847543 | -0.38844035049896  | H | 2.30781765519862  | -0.40075445099109 | 1.71977502036457  |
| C                    | -5.40683499447244 | 2.72162316382644  | 0.53819642229912   | H | 2.37545024730513  | 0.19690945990185  | 3.34703386267182  |
| C                    | -4.66276242756236 | -1.98072847963543 | 0.32776298716992   | H | 2.49213187904534  | 2.28354911353263  | -2.31516598769217 |
| C                    | -4.01343859328534 | -2.77682567716035 | 1.46253572387244   | H | 1.77213710772505  | 0.73277594525622  | -2.72101983975533 |
| C                    | -5.30884094519485 | -2.94420817532456 | -0.67373010641486  | H | 4.50411269159169  | 1.00150002821680  | -1.38988066388610 |
| C                    | -0.40867030205305 | 0.27997168759465  | -0.19581625206698  | H | 4.30162016658444  | 0.92268926678720  | -3.11603486790704 |
| C                    | 1.89192975809145  | 1.09590812025643  | -0.60812426976145  | H | 3.58931265935837  | -1.32138577522519 | -3.10517747933033 |
| O                    | -0.02838012791380 | -0.81209294448340 | 0.21710078077848   | H | 3.03790866007949  | -1.27471837132097 | -1.45806353720060 |
| N                    | 0.44504790688864  | 1.25775408394736  | -0.59991559764778  | H | 5.96947716744835  | -1.23065846146904 | -2.31561427660336 |
| C                    | 2.54077514719483  | 2.06102930271173  | 0.39031283696788   | H | 5.09720594884318  | -2.64862795168630 | -1.77296760460031 |
| C                    | 2.23813260135264  | 1.74431390778094  | 1.86010564159243   | H | 5.62424318678133  | -0.15830924174312 | -0.08409167688884 |
| C                    | 2.75353277667432  | 0.38079194779213  | 2.33707809355754   | H | 6.55724763830921  | -1.62499591781199 | -0.01111988228425 |
| C                    | 2.46118440772555  | 1.22594304836313  | -0.202944730399650 | H | 4.74384544135209  | -2.89607646650897 | 0.91195149497268  |

|                       |                   |                   |                   |                       |                   |                   |                   |
|-----------------------|-------------------|-------------------|-------------------|-----------------------|-------------------|-------------------|-------------------|
| H                     | 3.55993082636308  | -1.67472569259236 | 0.54168463107044  | C                     | -5.66587004960847 | -0.73786516950238 | 1.49959428597427  |
| H                     | 5.84419498111897  | -1.23534599820573 | 2.51612737738253  | C                     | -5.93733562791662 | 0.44613583836606  | 0.82825298884650  |
| H                     | 4.25708561625955  | -1.80775249882895 | 2.98644955536629  | C                     | -5.07285332337378 | 0.89516290505629  | -0.16534111050305 |
| H                     | 4.71622161731871  | 0.83137003234589  | 1.53157831650916  | C                     | -3.93478283430469 | 0.16804832851457  | -0.49988487244492 |
| H                     | 4.67207993091841  | 0.70695037014308  | 3.26572218936305  | C                     | -3.67020435535279 | -1.02332193354289 | 0.17843490099682  |
|                       |                   |                   |                   | C                     | -4.52942995533494 | -1.47193455211874 | 1.17083356878519  |
| <b>Ligand R=CH2Ph</b> |                   |                   |                   |                       |                   |                   |                   |
| H                     | 1.65922895776630  | -1.72877053887796 | 0.31770384988980  | H                     | -6.33619640750918 | -1.09062673458650 | 2.27324378036818  |
| C                     | 2.95461483936814  | 1.88125400943611  | 0.37561244876430  | H                     | -6.81983207138551 | 1.02249327285129  | 1.07655202272998  |
| C                     | 2.00752913306872  | 1.28487878180709  | 1.40506731509927  | H                     | -5.28864052136164 | 1.82054005382305  | -0.68769388972447 |
| C                     | 0.62731272523111  | 1.18449499819299  | 0.80541866459327  | H                     | -2.79020073428742 | -1.59851005905799 | -0.08244007362715 |
| H                     | -0.24788912972814 | 1.51565351007401  | 1.35051021860133  | H                     | -4.31675629707335 | -2.39961795865854 | 1.68753203858354  |
| C                     | 0.59976851779614  | 0.55018228263914  | -0.36768391385590 | <b>Ligand R=CHPh2</b> |                   |                   |                   |
| C                     | 1.95858527805680  | 0.07152173398611  | -0.82972052347106 | H                     | -3.06032921533056 | 1.32899185598339  | -0.90417204710501 |
| C                     | 2.92004282587155  | 1.23473253613342  | -0.78681426542786 | C                     | -3.46307887764370 | -1.61239266688716 | 1.52491917513922  |
| H                     | 3.54790630805059  | 1.48073578472168  | -1.63373880889497 | C                     | -2.94277515655926 | -0.23536216181252 | 1.90618909144333  |
| C                     | 2.48886388811358  | -0.19318290953009 | 1.61560795870255  | C                     | -1.52528650643663 | -0.09259971927331 | 1.41222240228234  |
| H                     | 1.86633625855557  | -0.67302017286929 | 2.37155480163983  | H                     | -0.74551059621187 | 0.30064210897510  | 2.05275966650640  |
| H                     | 3.50892250237219  | -0.16681121605734 | 2.00278718132589  | C                     | -1.38128217006788 | -0.37086702347489 | 0.11532215040114  |
| C                     | 2.43165913361792  | -0.95664157675459 | 0.26888504378871  | C                     | -2.67319093954732 | -0.76358086372954 | -0.56707670243779 |
| C                     | 3.83013050824782  | 3.03314679467882  | 0.73967480830179  | C                     | -3.31980859685973 | -1.87259104011838 | 0.22785833226694  |
| H                     | 4.46603355487436  | 2.78851849242640  | 1.59710235024488  | H                     | -3.66024495827831 | -2.78409650599882 | -0.24683301054830 |
| H                     | 3.23465599553599  | 3.90502947762554  | 1.02941913014960  | C                     | -3.79127889741220 | 0.78470191918521  | 1.06964654266784  |
| H                     | 4.47574396783423  | 3.32132724031737  | -0.09080372520371 | H                     | -3.49004021086775 | 1.80157422406097  | 1.32343325180723  |
| C                     | 3.76121419190242  | -1.65460060611956 | -0.06827259195928 | H                     | -4.83778373029763 | 0.67313531679549  | 1.35878364135994  |
| H                     | 4.55565695580179  | -0.90231638754331 | -0.00399613588732 | C                     | -3.60511984097209 | 0.50183309484723  | -0.44146559508589 |
| C                     | 4.05807859824229  | -2.75420475820567 | 0.95708953633787  | C                     | -4.09034635523350 | -2.48823204484898 | 2.55699586573996  |
| H                     | 4.07429002427542  | -2.37137300567053 | 1.97876721435331  | H                     | -4.94666772330127 | -1.99388551830698 | 3.02790358919282  |
| H                     | 5.02674963243845  | -3.21904500158023 | 0.76113250511843  | H                     | -3.38168308084507 | -2.71863304564925 | 3.35913046262708  |
| H                     | 3.29696227534149  | -3.53832157887874 | 0.90799651451580  | H                     | -4.43557313882080 | -3.42858092120205 | 2.12560617008623  |
| C                     | 3.77789057118156  | -2.24584495103532 | -1.47986177547600 | C                     | -4.94585844603101 | 0.35917941146482  | -1.18346948923485 |
| H                     | 2.92408540044059  | -2.91095788103695 | -1.63607172547373 | H                     | -5.54032788477808 | -0.39230760226303 | -0.65122313222256 |
| H                     | 4.68806545393520  | -2.82806926748691 | -1.63964219298678 | C                     | -5.71356655361643 | 1.68518642631054  | -1.15427030430821 |
| H                     | 3.74378356806906  | -1.47483508406288 | -2.25008066234574 | H                     | -5.87896404267881 | 2.04301905252672  | -0.13675376870050 |
| C                     | -0.61295102600026 | 0.14059562599180  | -1.11443330035093 | H                     | -6.68971952817793 | 1.58073698837848  | -1.63288218954610 |
| C                     | -2.98561066546856 | 0.65974325117849  | -1.56739031452434 | H                     | -5.16037672645642 | 2.45994386933782  | -1.69307626482987 |
| O                     | -0.64597978678502 | -0.90801166442022 | -1.74989454877040 | C                     | -4.77374093577364 | -0.10568352557940 | -2.63158435634300 |
| H                     | 1.88715329973108  | -0.40365550071889 | -1.80144771335819 | H                     | -4.08413919742737 | 0.54794890338124  | -3.17289123196297 |
| H                     | 2.01821297646941  | 1.83396985584598  | 2.34577525258750  | H                     | -5.73214149730438 | -0.08605720974586 | -3.15503612322209 |
| N                     | -1.67024687849893 | 0.99652827284427  | -1.04559747235772 | H                     | -4.38689917028473 | -1.12301974119702 | -2.69563651330336 |
| H                     | -1.57351171990600 | 1.82082412140822  | -0.47766505812196 | C                     | -0.16329534322448 | -0.14839992783177 | -0.69706692395611 |
| H                     | -2.82629201368103 | -0.10984452677256 | -2.32228013285888 | C                     | 2.28747582532518  | 0.12984946619118  | -0.60803279697980 |
| H                     | -3.40418399461345 | 1.53755105716937  | -2.06308300267426 | O                     | -0.23458444781505 | 0.17617322736143  | -1.87656761530914 |

|                      |                   |                   |                   |   |                   |                   |                   |
|----------------------|-------------------|-------------------|-------------------|---|-------------------|-------------------|-------------------|
| H                    | -2.49474336544661 | -1.01352737568751 | -1.60662744588923 | H | -4.16296338996146 | 4.24358029426490  | 0.45098884716254  |
| H                    | -3.03796817552705 | -0.03680421842800 | 2.97296346766665  | H | -5.10719290142183 | 3.41045858947161  | 1.69605378063369  |
| N                    | 1.02348716727415  | -0.33188269293263 | -0.04930157468860 | H | -5.67620818076571 | 3.46231606180524  | 0.02042935108388  |
| H                    | 0.99019752065493  | -0.52778406792148 | 0.93756168565990  | C | -5.27385123908323 | -1.33305706102936 | -0.00661404123479 |
| H                    | 2.06131883697180  | 0.33929683545956  | -1.65465230027438 | H | -5.91791061981244 | -0.55705892750032 | 0.42270993169818  |
| C                    | 5.38873323473468  | -2.87766125452210 | -0.56534436239975 | C | -6.03538322965223 | -2.00497718203004 | -1.15482927713303 |
| C                    | 4.07829127291710  | -3.23228814339957 | -0.27923284767025 | H | -6.29208989388254 | -1.29942115196855 | -1.94659138318217 |
| C                    | 3.07443352721206  | -2.26877379289658 | -0.27996276597645 | H | -6.96369559682846 | -2.45482085336596 | -0.79628576062368 |
| C                    | 3.36744726004208  | -0.93804822591858 | -0.56074318862692 | H | -5.43140600608423 | -2.80052973629575 | -1.60082013154094 |
| C                    | 4.68765955401922  | -0.59156833017326 | -0.85327825829602 | C | -4.97180370882412 | -2.36216615819859 | 1.08517131319215  |
| C                    | 5.68909055444462  | -1.55093201884346 | -0.85683694216918 | H | -4.23185142625786 | -3.09077254067542 | 0.74253285901403  |
| H                    | 6.17063429721089  | -3.62644100119200 | -0.56390948150463 | H | -5.87772501594153 | -2.90899075796458 | 1.35581818016576  |
| H                    | 3.83038828063785  | -4.26273216427747 | -0.05687264977342 | H | -4.58510892604997 | -1.89959519684015 | 1.99354690067590  |
| H                    | 2.05328008669535  | -2.55776184651020 | -0.07248518482152 | C | -0.55570987403093 | -0.26789998059654 | 0.05468312566483  |
| H                    | 4.93353527587011  | 0.43984608248969  | -1.07206838779213 | C | 1.95488202232002  | 0.02923436165116  | -0.02728046621400 |
| H                    | 6.70744352121992  | -1.26250077085090 | -1.08562610331899 | O | -0.52307547066846 | -1.42997919105150 | 0.43382871333058  |
| C                    | 3.25051042978121  | 3.85292590529621  | 1.34371123811849  | H | -2.80011098300615 | -0.83630538252665 | 1.30495455792836  |
| C                    | 3.58888423367114  | 2.64602587629898  | 1.94649027612501  | H | -3.74958033274804 | 2.64110364282029  | -1.73170542982116 |
| C                    | 3.30878631089155  | 1.44560129200317  | 1.30769470783265  | N | 0.55971188233474  | 0.45663851513892  | -0.25168567878160 |
| C                    | 2.68359061632920  | 1.43491791827423  | 0.06164254450072  | H | 0.42535896621693  | 1.44070524144276  | -0.40467660141371 |
| C                    | 2.34658587542064  | 2.64689956526146  | -0.53478978140182 | C | 4.30664290578853  | 3.64933503390936  | -0.50005888086381 |
| C                    | 2.63015101937178  | 3.85025463802573  | 0.10054205428182  | C | 4.42971394532164  | 2.90072499902544  | 0.66071248953929  |
| H                    | 3.47428498781981  | 4.78953326904685  | 1.83856459774046  | C | 3.67589211339379  | 1.74382581419106  | 0.83848749414627  |
| H                    | 4.07774271860958  | 2.64087540456931  | 2.91280099625010  | C | 2.79118703424246  | 1.31854094446087  | -0.14526339413422 |
| H                    | 3.59420057468568  | 0.50985781099867  | 1.77315848584011  | C | 2.68816618198879  | 2.06911841441198  | -1.31987364227463 |
| H                    | 1.85218228362067  | 2.64466010675192  | -1.49859604921431 | C | 3.42993631291708  | 3.22686113029899  | -1.49414613428888 |
| H                    | 2.36663644379641  | 4.78581220219729  | -0.37676677662326 | H | 4.89209222476992  | 4.54986667697120  | -0.63508736260929 |
| <b>Ligand R=CPh3</b> |                   |                   |                   | H | 5.11534511038896  | 3.21324527567798  | 1.43834953682601  |
| H                    | -3.41780184210237 | -1.39891771721997 | -1.06544863090483 | H | 3.78526890973820  | 1.17298738697321  | 1.74845811082497  |
| C                    | -4.05300715772346 | 2.10321775984199  | 0.36080941725575  | H | 2.04178385428327  | 1.72503984744803  | -2.11777073475438 |
| C                    | -3.56035044215953 | 1.81392404423951  | -1.04869089500498 | H | 3.33496797458211  | 3.79297617383958  | -2.41229499482079 |
| C                    | -2.10364106479639 | 1.42749282584797  | -0.99260225420433 | C | 3.39419477339729  | -2.68802328725482 | -3.09219811315183 |
| H                    | -1.38155848114668 | 1.86500791322283  | -1.67063152605573 | C | 2.03038537248463  | -2.53572459313286 | -2.88712666514369 |
| C                    | -1.84475953868379 | 0.44397582363939  | -0.12905170453338 | C | 1.55501393436430  | -1.66655514995629 | -1.91083898801946 |
| C                    | -3.07225569979478 | -0.06570904713541 | 0.59312877204618  | C | 2.43672757708242  | -0.93203721296227 | -1.12557281455923 |
| C                    | -3.79437174977624 | 1.10939150382502  | 1.20670771605324  | C | 3.80680740107036  | -1.08657286732178 | -1.34414659221807 |
| H                    | -4.09922319301976 | 1.10533996665969  | 2.24552260559379  | C | 4.28342358424038  | -1.95781979155756 | -2.31262999211611 |
| C                    | -4.32874114478585 | 0.52472463947039  | -1.50486726693020 | H | 3.76185996255145  | -3.36547920030039 | -3.85254678187262 |
| H                    | -4.05295490883932 | 0.28017767754659  | -2.53130528062734 | H | 1.32499529437359  | -3.09874414707505 | -3.48558288817028 |
| H                    | -5.39724647052578 | 0.74694518300496  | -1.49967483761269 | H | 0.49188049315249  | -1.58396652344920 | -1.75630105563107 |
| C                    | -4.00621272819813 | -0.64227819091735 | -0.53926419986135 | H | 4.51155941960201  | -0.51572203587387 | -0.75450418184340 |
| C                    | -4.78797374241999 | 3.36785022183399  | 0.65399621494440  | H | 5.35092610043928  | -2.05996693926263 | -2.46283738057166 |
|                      |                   |                   |                   | C | 2.30643984369225  | -1.59384336800917 | 3.98148171126845  |

|                    |                   |                   |                   |                         |                   |                   |                   |
|--------------------|-------------------|-------------------|-------------------|-------------------------|-------------------|-------------------|-------------------|
| C                  | 2.88052039406240  | -2.26729726171876 | 2.91427295852170  | N                       | -2.07846909170016 | 0.47478719366533  | 0.03517613874449  |
| C                  | 2.76468545906410  | -1.76759571321402 | 1.62085485461061  | H                       | -1.87955334240183 | 1.45431105211847  | 0.15266005202486  |
| C                  | 2.07659788604170  | -0.58685324569269 | 1.37536440678615  | C                       | -6.18931745858027 | -0.37646398406695 | 0.03738439771680  |
| C                  | 1.49778095571317  | 0.08089094952940  | 2.45512298211996  | C                       | -5.27596294530245 | -1.41108550378721 | -0.11898169472276 |
| C                  | 1.60870316481545  | -0.41411894864866 | 3.74406035918228  | C                       | -3.90745455707917 | -1.17236267209539 | -0.1286335323318  |
| H                  | 2.39234986110615  | -1.98564288190610 | 4.98711094957311  | C                       | -3.43972282092677 | 0.13561375428705  | 0.02262653874722  |
| H                  | 3.41558829447656  | -3.19394619759192 | 3.08030186462520  | C                       | -4.35864082457653 | 1.17843761916256  | 0.18030012574181  |
| H                  | 3.20280639596904  | -2.31910003578556 | 0.80299509325420  | C                       | -5.71986193635710 | 0.92368081655293  | 0.18752665352157  |
| H                  | 0.94762652293610  | 0.99722304365506  | 2.28499976007491  | H                       | -7.25238253521611 | -0.57846905225036 | 0.04192057439521  |
| H                  | 1.14648717038967  | 0.11930554991033  | 4.56537018492695  | H                       | -5.62856124093134 | -2.42808983061797 | -0.23742022098345 |
| <b>Ligand R=Ph</b> |                   |                   |                   |                         |                   |                   |                   |
| H                  | 1.84019609991967  | -1.49310790284040 | 1.01935207039268  | H                       | -6.41489295514884 | 1.74463038352869  | 0.31059714108548  |
| C                  | 2.58037153485720  | 1.94355311069179  | -0.51482030484619 | <b>Ligand R=Ph(Me)2</b> |                   |                   |                   |
| C                  | 2.06138854843230  | 1.71616495900496  | 0.89659262907465  | H                       | -2.14969018185345 | -1.70986461381898 | -0.50493275589217 |
| C                  | 0.59634171291152  | 1.36604567198533  | 0.83200858163082  | C                       | -2.89539939418299 | 2.02424458033759  | -0.04963126380981 |
| H                  | -0.12175371221373 | 1.84118253668615  | 1.48903212900014  | C                       | -2.42685578195919 | 1.38116429481315  | -1.34581819702663 |
| C                  | 0.32303656065221  | 0.35887059022633  | -0.00056529748905 | C                       | -0.95511579049658 | 1.07184051035924  | -1.23936122378461 |
| C                  | 1.54695439112129  | -0.20695716142391 | -0.68632070532082 | H                       | -0.26769286719739 | 1.32691379160933  | -2.0359332930672  |
| C                  | 2.30647284178352  | 0.92829743747949  | -1.32976561763971 | C                       | -0.63429858711883 | 0.36674823045904  | -0.15214687636038 |
| H                  | 2.62467360048803  | 0.88025936530856  | -2.36336980308899 | C                       | -1.82086157013199 | 0.03186905239292  | 0.72349007127768  |
| C                  | 2.78754188168753  | 0.42363937768710  | 1.40950521732563  | C                       | -2.57616069819860 | 1.30464319612812  | 1.02295922828708  |
| H                  | 2.48637769279933  | 0.22104664683563  | 2.43781601752741  | H                       | -2.85580861311807 | 1.57089099165672  | 2.03437309975098  |
| H                  | 3.86121295062920  | 0.61871135912638  | 1.41720404281423  | C                       | -3.15213194545965 | -0.00840250280491 | -1.41047411049441 |
| C                  | 2.45211032672905  | -0.76689643584191 | 0.47764281438395  | H                       | -2.89225890424666 | -0.51194346372268 | -2.34225312441340 |
| C                  | 3.35253721938749  | 3.17790857478472  | -0.84006555417656 | H                       | -4.22821632147295 | 0.17234667070660  | -1.42769962738910 |
| H                  | 4.23398683434181  | 3.27081333173269  | -0.19695606089107 | C                       | -2.75670491103223 | -0.86068533110770 | -0.17903457662293 |
| H                  | 2.74823575565631  | 4.07606521333014  | -0.67617821458290 | C                       | -3.67060934535227 | 3.29866920175016  | -0.08264804679049 |
| H                  | 3.68720268999251  | 3.17653854683036  | -1.87807344581787 | H                       | -4.57928685095023 | 3.19177092874525  | -0.68442278725446 |
| C                  | 3.71202769025772  | -1.50058972384396 | -0.01544963346526 | H                       | -3.96230535966798 | 3.61380968784217  | 0.91992742575663  |
| H                  | 4.38077059715754  | -0.75130975039121 | -0.45436948911870 | H                       | -3.08552534854094 | 4.10394615210532  | -0.53873177033872 |
| C                  | 4.43883020374864  | -2.15850615099533 | 1.16284797188839  | C                       | -3.97845351916327 | -1.42606405971872 | 0.56548371547785  |
| H                  | 4.69773319991027  | -1.43808088541780 | 1.94043602746904  | H                       | -4.63813533854354 | -0.58462523743494 | 0.80720685745905  |
| H                  | 5.36287845991876  | -2.63743217891178 | 0.83217589730140  | C                       | -4.75272910411356 | -2.39455386690248 | -0.33516260805468 |
| H                  | 3.80999359455030  | -2.92865852372561 | 1.61880797365831  | H                       | -5.06641038530135 | -1.92636610486589 | -1.26943796015279 |
| C                  | 3.40513114062466  | -2.55047324196989 | -1.08569606247300 | H                       | -5.64867542348818 | -2.76257924493258 | 0.16934660089727  |
| H                  | 2.64394282303924  | -3.25439785359584 | -0.73792886442603 | H                       | -4.13506559627217 | -3.26104389259382 | -0.58904199984612 |
| H                  | 4.30319415738104  | -3.12333158186431 | -1.32681826332311 | C                       | -3.59925935985185 | -2.12682142161548 | 1.87205235430230  |
| H                  | 3.04483512033942  | -2.10241606771954 | -2.01212076908458 | H                       | -2.85149301096028 | -2.90521902502390 | 1.69621848885589  |
| C                  | -0.98103920968112 | -0.32625790768672 | -0.16705073958983 | H                       | -4.47526233291125 | -2.60190334584749 | 2.31910118464396  |
| O                  | -1.04286447276941 | -1.51231553092469 | -0.45597502169189 | H                       | -3.19134439702042 | -1.43477156657604 | 2.60899329515874  |
| H                  | 1.26725803876391  | -0.99455207699787 | -1.37651982940849 | C                       | 0.68902947819120  | -0.21561953306043 | 0.16924989195240  |
| H                  | 2.26212155264157  | 2.56131235174998  | 1.55368179339770  |                         |                   |                   |                   |

|                                     |                   |                   |                   |   |                   |                   |                   |
|-------------------------------------|-------------------|-------------------|-------------------|---|-------------------|-------------------|-------------------|
| O                                   | 0.79804673205009  | -1.21695585881481 | 0.85997527154731  | C | -5.41797821882448 | -2.04135347873904 | 0.96339396138190  |
| H                                   | -1.50033098969036 | -0.50703214541311 | 1.60752959727439  | H | -5.74302115281675 | -2.07259684777717 | -0.07781896091360 |
| H                                   | -2.66647577467236 | 1.98591288135753  | -2.21946616664748 | H | -6.31193576180022 | -2.05419925527881 | 1.59068050894167  |
| N                                   | 1.76566942330919  | 0.44175765511056  | -0.37780754796378 | H | -4.85842505560177 | -2.95962521828514 | 1.16414584921402  |
| H                                   | 1.58615492002470  | 1.38390254814125  | -0.68335409791429 | C | -4.16562041358117 | -0.80383416478678 | 2.74416745771113  |
| C                                   | 5.79634636338420  | -0.52293880078553 | 0.23819112904204  | H | -3.46581990358935 | -1.61382648110188 | 2.96784766877909  |
| C                                   | 4.95264899800503  | -1.44224493671748 | -0.36465889419096 | H | -5.04770990422204 | -0.94230180430296 | 3.37312320237995  |
| C                                   | 3.60729081533078  | -1.15520196032269 | -0.58752423137703 | H | -3.69526064833428 | 0.13334815053311  | 3.04272036875982  |
| C                                   | 3.12269742908437  | 0.08782538903088  | -0.16225360704580 | C | 0.16405125228771  | -0.25858091049275 | 0.24795303135866  |
| C                                   | 3.96144444618218  | 1.03151379732175  | 0.44728248225039  | O | 0.26321228055744  | -0.93728324528403 | 1.25891612416257  |
| C                                   | 5.30157745262350  | 0.71147776358136  | 0.63344602461893  | H | -1.97515471410970 | 0.29517579646563  | 1.70760412982904  |
| H                                   | 6.83992053550632  | -0.76488633569813 | 0.39487315777883  | H | -3.19768131594224 | 0.75958974761621  | -2.82206258024283 |
| H                                   | 5.34175551756067  | -2.40086132820968 | -0.68590343028809 | N | 1.24420383131198  | 0.13864086239449  | -0.49722710260461 |
| C                                   | 2.72746596979719  | -2.15218586545262 | -1.28289845225943 | H | 1.07287648764470  | 0.87401114986725  | -1.16223795913177 |
| C                                   | 3.41933148598042  | 2.35886592433112  | 0.90239529927606  | C | 5.23992244432904  | -0.54097053765767 | 0.55623892501200  |
| H                                   | 5.95743908028983  | 1.43342829560716  | 1.10474458217970  | C | 4.48297253791721  | -1.57160189664211 | 0.01929591988182  |
| H                                   | 3.33060843060299  | -2.89612017397465 | -1.80324252427213 | C | 3.14974686443095  | -1.37612188744993 | -0.32871291439889 |
| H                                   | 2.07879609026772  | -2.66120727858219 | -0.56810436100640 | C | 2.59796416804213  | -0.10643965306281 | -0.11508320286540 |
| H                                   | 2.07719565759719  | -1.66337213338228 | -2.01126567390284 | C | 3.33608009697771  | 0.93985352883492  | 0.45341391743927  |
| H                                   | 4.18590383576576  | 2.92639002068847  | 1.42869488322069  | C | 4.67087624767170  | 0.70327792946897  | 0.77184863281820  |
| H                                   | 3.07966888728218  | 2.97569297304328  | 0.06326007989342  | H | 6.27697810951075  | -0.71271765867442 | 0.81688702076442  |
| H                                   | 2.56682628413312  | 2.23224216026019  | 1.57363652350406  | H | 4.94038809115497  | -2.53943877737321 | -0.12995668321629 |
| <b>Ligand R=Ph(iPr)<sub>2</sub></b> |                   |                   |                   | C | 2.32517972088287  | -2.47816375829475 | -0.96818469349561 |
| H                                   | -2.79718711689769 | -1.71308647946813 | 0.44562424199282  | C | 2.69663505362262  | 2.29541940213629  | 0.68817306076979  |
| C                                   | -3.31991741894803 | 1.83203359376140  | -0.92565907830766 | H | 5.26846405182270  | 1.49154391723531  | 1.20874507329154  |
| C                                   | -2.9450177226685  | 0.62441475931085  | -1.77109864079949 | C | 2.29386797362022  | -2.30103662040548 | -2.49430638719156 |
| C                                   | -1.48566999411302 | 0.31137492649817  | -1.55881623208542 | C | 2.79339783157285  | -3.88674233056563 | -0.59880877414653 |
| H                                   | -0.82032921722203 | 0.12235792251139  | -2.39166560150745 | H | 1.30545035895151  | -2.37862685824811 | -0.59733632498619 |
| C                                   | -1.15002634866108 | 0.18141558992142  | -0.27414491350440 | C | 2.82373393352746  | 3.17919281188796  | -0.56303461786843 |
| C                                   | -2.30864221408988 | 0.37418554408124  | 0.67895641056687  | H | 1.63336776724509  | 2.12315237284946  | 0.86789834844186  |
| C                                   | -2.98247172152861 | 1.68621147981893  | 0.35326798526766  | C | 3.24358423094358  | 3.02474702462198  | 1.91766680856146  |
| H                                   | -3.19782013497737 | 2.41725452162955  | 1.12224812979558  | H | 2.65832562172610  | 3.92726734500077  | 2.10543810865310  |
| C                                   | -3.73674641485859 | -0.58262436743356 | -1.15706753631344 | H | 3.19049870232402  | 2.39460217945767  | 2.80662524737968  |
| H                                   | -3.53578125438113 | -1.48240264268218 | -1.73959462064910 | H | 4.28177443477077  | 3.33490998658966  | 1.78207868516528  |
| H                                   | -4.80341182862291 | -0.36990110056265 | -1.24695100506849 | H | 2.31287089369513  | 4.13389520529864  | -0.41844389204241 |
| C                                   | -3.33586766215868 | -0.76917866748327 | 0.32724614406150  | H | 3.87444218383748  | 3.38420194464948  | -0.78067777872459 |
| C                                   | -4.03676884120601 | 2.98581151130561  | -1.54287689809894 | H | 2.39691287177001  | 2.70137510314271  | -1.44803350378996 |
| H                                   | -4.97659893147888 | 2.66431103336845  | -2.00398923116184 | H | 1.65958867888461  | -3.06804786433840 | -2.95732251637209 |
| H                                   | -3.43798933569059 | 3.44227598393879  | -2.33770959666544 | H | 1.90446013881528  | -1.32058127155211 | -2.77077520055087 |
| H                                   | -4.26636515555246 | 3.75415714247590  | -0.80360084239054 | H | 3.29813120725059  | -2.39573844706794 | -2.91466120055173 |
| C                                   | -4.55614339935969 | -0.81060621714086 | 1.26453725951452  | H | 2.08654192535252  | -4.62362294877683 | -0.98511685648561 |
| H                                   | -5.15547775989576 | 0.08478252287438  | 1.06439581504262  | H | 3.77040856895264  | -4.12077275676969 | -1.02782031891573 |
|                                     |                   |                   |                   | H | 2.85538810932692  | -4.01324649184828 | 0.48311724810908  |

| Ligand R=Fr |                   |                   |                   |   |                  |                   |                   |
|-------------|-------------------|-------------------|-------------------|---|------------------|-------------------|-------------------|
| H           | -3.06367132871097 | -1.63965010020010 | 0.19182490118987  | H | 6.37351059896030 | 0.71217823010901  | -0.71875970406796 |
| C           | -3.63018303565387 | 1.98375785340514  | -0.93104043187496 | H | 6.46313659326827 | 3.03587512711765  | 0.12333183332373  |
| C           | -2.97835525894473 | 0.90345801061699  | -1.77969503956061 | H | 4.53864241056890 | 4.01649184721025  | 1.30761671778341  |
| C           | -1.57275618061852 | 0.66967069326092  | -1.28699527204821 | H | 2.48230276613220 | 2.67565827719017  | 1.68674400703830  |
| H           | -0.74044337076359 | 0.61036913201276  | -1.97717295696759 | C | 4.02228939597585 | -0.97769335384369 | -0.38722360040428 |
| C           | -1.49851686798069 | 0.42827710589803  | 0.02315186175059  | C | 2.72382162340920 | -1.25419697374718 | 0.05851055827804  |
| C           | -2.84267760436825 | 0.43984387925317  | 0.71736874611756  | C | 2.12565196458708 | -2.47350699405433 | -0.19722366855570 |
| C           | -3.55420026200769 | 1.72569041895800  | 0.37195472059805  | C | 2.84344828895532 | -3.42927510449859 | -0.91434591556629 |
| H           | -3.99148640392801 | 2.35268654542993  | 1.13854062692544  | C | 4.13806113452497 | -3.16147900395001 | -1.35457674724123 |
| C           | -3.76614802567679 | -0.41520211694992 | -1.46138625597917 | C | 4.73978361015939 | -1.93448049495910 | -1.09403618077697 |
| H           | -3.36955790345551 | -1.23055156524689 | -2.06749027983907 | H | 1.12457312798628 | -2.68112749832824 | 0.15888026856377  |
| H           | -4.80685339607904 | -0.26829787593548 | -1.7552231473349  | H | 2.39431500617419 | -4.39112730047774 | -1.12703234044766 |
| C           | -3.65948604743330 | -0.73390453833879 | 0.05059305176203  | H | 4.68173024589022 | -3.91817168333618 | -1.90614946412142 |
| C           | -4.30670236454685 | 3.14313895703760  | -1.58219969496335 | H | 5.74630098665020 | -1.73476068611442 | -1.44033774914121 |
| H           | -5.09596924088352 | 2.80720730331267  | -2.26305306367148 |   |                  |                   |                   |
| H           | -3.60059789616108 | 3.72475077757938  | -2.18371521828314 |   |                  |                   |                   |
| H           | -4.75536869640185 | 3.80853787800138  | -0.84363298935816 |   |                  |                   |                   |
| C           | -5.03203183664217 | -0.97983106404652 | 0.70119627056813  |   |                  |                   |                   |
| H           | -5.66584682303744 | -0.11502083275487 | 0.47407010286055  |   |                  |                   |                   |
| C           | -5.69159234288789 | -2.22634006413597 | 0.10163404258867  |   |                  |                   |                   |
| H           | -6.68481962293204 | -2.38421037822272 | 0.52757425890573  |   |                  |                   |                   |
| H           | -5.09363801413406 | -3.11716147941735 | 0.31537455829650  |   |                  |                   |                   |
| H           | -5.80310237991049 | -2.15424437966730 | -0.98148654689762 |   |                  |                   |                   |
| C           | -4.94522130875523 | -1.12359700258714 | 2.2244265567840   |   |                  |                   |                   |
| H           | -4.64150942439908 | -0.19574247373056 | 2.70764664949244  |   |                  |                   |                   |
| H           | -4.22376848278223 | -1.89658900482919 | 2.50128985482774  |   |                  |                   |                   |
| H           | -5.91530356663987 | -1.40768263512366 | 2.63610624409555  |   |                  |                   |                   |
| C           | -0.29744751722704 | -0.01231301679215 | 0.76929633820516  |   |                  |                   |                   |
| O           | -0.38609412833943 | -0.74481835724454 | 1.74901289276743  |   |                  |                   |                   |
| H           | -2.72316759154078 | 0.27573796557845  | 1.78214888364375  |   |                  |                   |                   |
| H           | -3.01696480451605 | 1.13204716682551  | -2.84393865936075 |   |                  |                   |                   |
| N           | 0.89949856474249  | 0.43911335715092  | 0.30182150132341  |   |                  |                   |                   |
| H           | 0.91511742210969  | 1.01764250491417  | -0.52097038818918 |   |                  |                   |                   |
| H           | 1.98061923489149  | -0.33471090045546 | 1.85541337989249  |   |                  |                   |                   |
| C           | 2.16237883106953  | -0.06226094446897 | 0.81236826618001  |   |                  |                   |                   |
| C           | 3.28310374761643  | 0.94746287605254  | 0.69635690993810  |   |                  |                   |                   |
| C           | 4.37092528393655  | 0.38902096312989  | 0.01111708904599  |   |                  |                   |                   |
| C           | 5.52444359411156  | 1.13425775854684  | -0.19572044275858 |   |                  |                   |                   |
| C           | 5.57153359164395  | 2.44146485923626  | 0.27850608793648  |   |                  |                   |                   |
| C           | 4.48393944692285  | 2.99680249056034  | 0.94835016516311  |   |                  |                   |                   |
| C           | 3.32868572707126  | 2.24691374506911  | 1.16397153006764  |   |                  |                   |                   |
